# Supplementary material for: The Genetic and Epigenetic Mechanisms Involved in Irreversible Pulp Neural Inflammation
Source: Dis Markers. 2021 Mar 8;2021:8831948. doi: 10.1155/2021/8831948 (PMC7968449; doi:10.1155/2021/8831948)
Supplement: Supplementary 1 — File S1: the topological characteristics of all DEG nodes in the PPI network shown in Figure 4. [file 8831948.f1.txt]

SUID	AverageShortestPathLength	BetweennessCentrality	ClosenessCentrality	ClusteringCoefficient	Degree	Eccentricity	IsSingleNode	name	NeighborhoodConnectivity	NumberOfDirectedEdges	NumberOfUndirectedEdges	PartnerOfMultiEdgedNodePairs	Radiality	regulate	selected	SelfLoops	shared name	Stress	TopologicalCoefficient
100	4.47189022	0.00283095	0.22361909	0	19	8	FALSE	A4GNT	1.89473684	19	0	0	0.68437362	mRNAup	FALSE	0	A4GNT	9442186	0.05263158
101	5.47177955	0	0.1827559	0	1	9	FALSE	PDXDC1	19	1	0	0	0.59347459		FALSE	0	PDXDC1	0	0
103	3.85579903	7.34E-04	0.25934962	0.0952381	7	8	FALSE	BLK	40.28571429	7	0	0	0.74038191		FALSE	0	BLK	2167652	0.17873158
105	5.47177955	0	0.1827559	0	1	9	FALSE	POMT1	19	1	0	0	0.59347459		FALSE	0	POMT1	0	0
107	5.47177955	0	0.1827559	0	1	9	FALSE	GLB1L2	19	1	0	0	0.59347459		FALSE	0	GLB1L2	0	0
109	3.76759628	7.07E-04	0.26542122	0	3	7	FALSE	GP1BB	100	3	0	0	0.74840034		FALSE	0	GP1BB	1912120	0.34375
111	3.98671979	5.28E-04	0.25083278	0	4	9	FALSE	POTEF	64.25	4	0	0	0.72848002		FALSE	0	POTEF	2332924	0.253
113	5.47177955	0	0.1827559	0	1	9	FALSE	FAM3C	19	1	0	0	0.59347459		FALSE	0	FAM3C	0	0
115	5.47177955	0	0.1827559	0	1	9	FALSE	RNF167	19	1	0	0	0.59347459		FALSE	0	RNF167	0	0
117	5.47177955	0	0.1827559	0	1	9	FALSE	IMPA2	19	1	0	0	0.59347459		FALSE	0	IMPA2	0	0
119	5.47177955	0	0.1827559	0	1	9	FALSE	COMMD3	19	1	0	0	0.59347459		FALSE	0	COMMD3	0	0
121	3.84528552	7.17E-04	0.26005871	0	3	7	FALSE	HOXD13	118	3	0	0	0.74133768		FALSE	0	HOXD13	2104026	0.33428571
123	5.47177955	0	0.1827559	0	1	9	FALSE	FAM69A	19	1	0	0	0.59347459		FALSE	0	FAM69A	0	0
125	5.47177955	0	0.1827559	0	1	9	FALSE	ARF5	19	1	0	0	0.59347459		FALSE	0	ARF5	0	0
127	3.95905268	2.91E-04	0.25258568	0	2	8	FALSE	ICK	107.5	2	0	0	0.73099521		FALSE	0	ICK	1226868	0.5
129	5.47177955	0	0.1827559	0	1	9	FALSE	LMF2	19	1	0	0	0.59347459		FALSE	0	LMF2	0	0
131	5.33543603	3.82E-06	0.18742611	0	2	9	FALSE	JMJD8	11	2	0	0	0.60586945		FALSE	0	JMJD8	7202	0.5
133	5.47177955	0	0.1827559	0	1	9	FALSE	FAM213A	19	1	0	0	0.59347459		FALSE	0	FAM213A	0	0
135	4.06263834	2.52E-04	0.24614546	0	3	9	FALSE	TMEM206	40.33333333	3	0	0	0.72157833		FALSE	0	TMEM206	672946	0.34202899
137	3.20141656	5.68E-04	0.31236173	0	6	8	FALSE	ABRACL	79.5	6	0	0	0.79987122	mRNAup	FALSE	0	ABRACL	504424	0.17065217
138	2.20362992	0.30969899	0.45379671	0.00409207	460	7	FALSE	UBC	39.61086957	460	0	0	0.8905791		FALSE	0	UBC	352592252	0.00555138
140	3.04493139	0.0042203	0.32841463	0.01008065	32	7	FALSE	ACADVL	38.84375	32	0	0	0.81409715	mRNAup	FALSE	0	ACADVL	2644896	0.03584472
141	3.96370075	2.22E-05	0.25228948	0	3	8	FALSE	KIF2A	25	3	0	0	0.73057266		FALSE	0	KIF2A	10396	0.33802817
143	4.04482072	0	0.24722975	0	1	8	FALSE	DENR	32	1	0	0	0.72319812		FALSE	0	DENR	0	0
146	3.61376715	6.23E-05	0.27671954	0.16666667	4	8	FALSE	ATP5L	186	4	0	0	0.7623848		FALSE	0	ATP5L	86986	0.27279412
148	4.0336432	8.93E-06	0.24791484	0	2	8	FALSE	INTS9	24.5	2	0	0	0.72421425		FALSE	0	INTS9	18210	0.5
150	3.65172643	3.40E-05	0.27384308	0	5	7	FALSE	EIF4A3	105.4	5	0	0	0.75893396		FALSE	0	EIF4A3	100226	0.22695652
152	3.28995131	0.00120336	0.30395587	0.02105263	20	7	FALSE	CDK1	101.6	20	0	0	0.79182261		FALSE	0	CDK1	2648348	0.06550941
154	4.04482072	0	0.24722975	0	1	8	FALSE	GPHN	32	1	0	0	0.72319812		FALSE	0	GPHN	0	0
156	3.37859672	0.00202225	0.29598087	0.02371542	23	7	FALSE	ALB	65.91304348	23	0	0	0.78376393		FALSE	0	ALB	3357032	0.05159604
158	3.43348827	2.38E-04	0.29124899	0.10714286	8	7	FALSE	RPSA	194.25	8	0	0	0.77877379		FALSE	0	RPSA	703070	0.14972952
160	3.01206286	0.00286009	0.33199838	0.01505376	31	6	FALSE	ACSL4	48.58064516	31	0	0	0.81708519	mRNAup	FALSE	0	ACSL4	2978374	0.0398324
161	2.88025675	0.03055787	0.34719127	0.00434174	120	6	FALSE	APP	39.73333333	120	0	0	0.82906757		FALSE	0	APP	53134826	0.01244689
163	3.16998672	0.00245141	0.31545873	0.01960784	34	7	FALSE	YWHAZ	82.79411765	34	0	0	0.80272848		FALSE	0	YWHAZ	5426162	0.04029325
165	4.01195219	0	0.24925521	0	1	7	FALSE	DSE	31	1	0	0	0.72618616		FALSE	0	DSE	0	0
167	2.70008853	0.09213592	0.37035823	0.00156395	656	7	FALSE	UBD	8.69054878	656	0	0	0.8454465	mRNAup	FALSE	0	UBD	195876538	0.00370169
169	3.06706507	0.00860765	0.3260446	2.02E-04	100	8	FALSE	ACTA2	14.7	100	0	0	0.81208499	mRNAup	FALSE	0	ACTA2	18498674	0.02069382
171	3.47587428	1.09E-04	0.2876974	0.19047619	7	7	FALSE	RPL18	222.5714286	7	0	0	0.77492052		FALSE	0	RPL18	681582	0.19741182
173	3.62439132	3.50E-05	0.2759084	0.2	5	7	FALSE	RPL17	163.8	5	0	0	0.76141897		FALSE	0	RPL17	144360	0.25099846
175	4.03718459	4.20E-05	0.24769737	0	2	9	FALSE	MRPS7	67	2	0	0	0.72389231		FALSE	0	MRPS7	124684	0.5
177	3.46491811	1.26E-04	0.28860711	0.17857143	8	8	FALSE	MYO1C	199.375	8	0	0	0.77591654		FALSE	0	MYO1C	717054	0.16035455
179	3.17972554	0.00408372	0.31449255	0.02325581	44	7	FALSE	JUN	70.61363636	44	0	0	0.80184313		FALSE	0	JUN	10271252	0.0355922
181	3.6689907	1.86E-05	0.27255452	0	2	8	FALSE	MYL12B	378	2	0	0	0.75736448		FALSE	0	MYL12B	73456	0.51292517
183	3.51106684	4.31E-04	0.28481372	0.01098901	14	7	FALSE	GABARAPL2	78.14285714	14	0	0	0.7717212		FALSE	0	GABARAPL2	1251872	0.09612651
185	3.86443116	6.97E-06	0.2587703	0	2	8	FALSE	UBAP1	164.5	2	0	0	0.73959717		FALSE	0	UBAP1	32114	0.52572347
187	3.38424081	6.40E-04	0.29548725	0.04395604	14	7	FALSE	SPTAN1	133.0714286	14	0	0	0.78325084		FALSE	0	SPTAN1	1554478	0.09246336
189	3.70075255	8.39E-05	0.27021531	0	6	8	FALSE	ZYX	92.83333333	6	0	0	0.75447704		FALSE	0	ZYX	200710	0.18184818
191	3.61498451	1.94E-04	0.27662636	0.2	5	7	FALSE	RPL14	200.4	5	0	0	0.76227414		FALSE	0	RPL14	491120	0.24213075
193	3.42153608	2.69E-04	0.29226639	0.07142857	8	8	FALSE	MYH10	245.75	8	0	0	0.77986036		FALSE	0	MYH10	1522938	0.16448692
195	3.89043825	5.61E-05	0.25704045	0.1	5	7	FALSE	ACTN2	51.4	5	0	0	0.73723289		FALSE	0	ACTN2	84202	0.20566802
197	4.0669544	0	0.24588424	0	1	9	FALSE	MRPL47	100	1	0	0	0.72118596		FALSE	0	MRPL47	0	0
199	3.61000443	1.53E-04	0.27700797	0.06666667	6	7	FALSE	AARS	171.6666667	6	0	0	0.76272687		FALSE	0	AARS	309986	0.18037975
201	3.32934927	0.00175203	0.30035899	0.02910053	28	7	FALSE	CREBBP	74.28571429	28	0	0	0.78824098		FALSE	0	CREBBP	5254066	0.05176311
203	3.99424524	3.46E-06	0.25036019	0	2	8	FALSE	ALOX12	60	2	0	0	0.72779589		FALSE	0	ALOX12	6108	0.5042735
205	3.69555113	7.97E-05	0.27059563	0.16666667	4	7	FALSE	RPL10A	146	4	0	0	0.7549499		FALSE	0	RPL10A	144616	0.28641732
207	4.0501328	4.14E-06	0.24690548	0	2	9	FALSE	MRPS2	67	2	0	0	0.7227152		FALSE	0	MRPS2	9136	0.515625
209	3.55588756	7.41E-05	0.28122374	0.2	6	7	FALSE	RPS16	186.8333333	6	0	0	0.76764659		FALSE	0	RPS16	348612	0.21736597
211	3.21414343	0.00180876	0.31112488	0.07189542	18	7	FALSE	MYH9	140.3888889	18	0	0	0.79871423		FALSE	0	MYH9	4083594	0.07373258
213	3.32270916	0.00189369	0.30095923	0.01587302	28	7	FALSE	EP300	66.85714286	28	0	0	0.78884462		FALSE	0	EP300	5108580	0.04966727
215	3.43204958	1.79E-04	0.29137108	0.19047619	7	7	FALSE	RPS4X	256	7	0	0	0.77890458		FALSE	0	RPS4X	909540	0.18719933
217	3.49667995	1.06E-04	0.28598557	0	5	7	FALSE	GSTP1	259	5	0	0	0.7730291		FALSE	0	GSTP1	548114	0.22994652
219	3.46569278	2.28E-04	0.2885426	0.0952381	7	7	FALSE	RPL7A	201.5714286	7	0	0	0.77584611		FALSE	0	RPL7A	809194	0.18223028
221	3.8832448	2.86E-05	0.2575166	0	5	7	FALSE	SHBG	40.4	5	0	0	0.73788684		FALSE	0	SHBG	124988	0.20846561
223	3.31684374	0.00219401	0.30149144	0.01846154	26	7	FALSE	NFKB1	79.88461538	26	0	0	0.78937784		FALSE	0	NFKB1	4204606	0.05161614
225	4.0669544	0	0.24588424	0	1	9	FALSE	CNN2	100	1	0	0	0.72118596		FALSE	0	CNN2	0	0
227	3.61111111	1.05E-04	0.27692308	0.16666667	4	7	FALSE	RPS26	210.5	4	0	0	0.76262626		FALSE	0	RPS26	251308	0.273794
229	3.65095175	1.89E-05	0.27390118	0.33333333	4	7	FALSE	RPS23	173.5	4	0	0	0.75900439		FALSE	0	RPS23	96488	0.30992844
231	3.63623285	1.85E-04	0.27500989	0	5	8	FALSE	FSCN1	159.8	5	0	0	0.76034247		FALSE	0	FSCN1	378408	0.21344086
233	3.50664011	1.66E-04	0.28517326	0	6	8	FALSE	TPM1	204.6666667	6	0	0	0.77212363		FALSE	0	TPM1	522608	0.18805786
235	3.79791943	5.82E-05	0.26330206	0	3	8	FALSE	MYH11	198	3	0	0	0.74564369		FALSE	0	MYH11	180716	0.34929078
237	3.71768482	1.02E-04	0.26898461	0	4	7	FALSE	ACTC1	166.5	4	0	0	0.75293774		FALSE	0	ACTC1	259416	0.264377
239	3.92220009	2.49E-04	0.25495895	0	7	9	FALSE	TFAP2A	55.85714286	7	0	0	0.73434545		FALSE	0	TFAP2A	656054	0.16326531
241	3.53829128	5.80E-05	0.28262229	0.33333333	4	7	FALSE	RPS15A	315	4	0	0	0.76924625		FALSE	0	RPS15A	317224	0.28718066
243	3.18990704	3.17E-04	0.31348876	0.16666667	4	8	FALSE	ADAMTS5	120.75	4	0	0	0.80091754	mRNAup	FALSE	0	ADAMTS5	350156	0.25369198
245	3.98959717	3.39E-05	0.25065187	0.05555556	9	8	FALSE	MMP13	7	9	0	0	0.72821844	mRNAup	FALSE	0	MMP13	31208	0.13151927
247	3.97620629	1.28E-04	0.25149601	0.04761905	7	8	FALSE	TIMP3	25.71428571	7	0	0	0.72943579		FALSE	0	TIMP3	277980	0.16666667
249	4.49656928	0.00102117	0.22239177	0.1	5	8	FALSE	ADM	6.2	5	0	0	0.68213007	mRNAup	FALSE	0	ADM	1213782	0.21538462
250	5.49601594	4.43E-04	0.18194998	0	3	9	FALSE	DPYS	2.33333333	3	0	0	0.59127128	mRNAdown	FALSE	0	DPYS	477230	0.33333333
252	3.18038955	0.00124991	0.31442689	0.13333333	6	8	FALSE	AIF1	88	6	0	0	0.80178277	mRNAup	FALSE	0	AIF1	444354	0.17463479
254	3.08930943	0.00101133	0.32369694	0.02898551	24	8	FALSE	LCP1	40.45833333	24	0	0	0.81006278	mRNAup	FALSE	0	LCP1	1325120	0.05397471
256	3.58255865	6.88E-04	0.27913011	0.01515152	12	7	FALSE	PHB	73.83333333	12	0	0	0.76522194		FALSE	0	PHB	1059076	0.09170854
258	3.479305	6.66E-04	0.28741372	0.02857143	15	7	FALSE	ACTA1	79.66666667	15	0	0	0.77460864		FALSE	0	ACTA1	1080686	0.07700813
260	3.28939796	0.00667227	0.304007	0	109	8	FALSE	AIM2	5.9266055	109	0	0	0.79187291	mRNAup	FALSE	0	AIM2	15132458	0.02096428
261	3.7647189	3.04E-04	0.26562408	0	7	7	FALSE	APPBP2	63.14285714	7	0	0	0.74866192		FALSE	0	APPBP2	427836	0.14795918
263	3.8313413	9.17E-06	0.2610052	0	2	7	FALSE	POPDC3	272.5	2	0	0	0.74260534		FALSE	0	POPDC3	69098	0.53550296
265	3.48517043	3.66E-04	0.28693001	0.04761905	7	7	FALSE	EIF2AK2	175.2857143	7	0	0	0.77407542		FALSE	0	EIF2AK2	867388	0.16269471
267	3.63711819	1.95E-04	0.27494295	0.04761905	7	7	FALSE	PYCARD	118	7	0	0	0.76026198		FALSE	0	PYCARD	558994	0.15596505
269	3.51693227	2.62E-04	0.28433871	0	5	8	FALSE	DDX39A	236	5	0	0	0.77118798		FALSE	0	DDX39A	574108	0.21799629
271	3.43824701	3.82E-04	0.29084589	0.04761905	7	7	FALSE	PES1	271.7142857	7	0	0	0.77834118		FALSE	0	PES1	1522516	0.18587106
273	3.49734396	0.00154659	0.28593127	0	16	7	FALSE	SDCBP	81.5625	16	0	0	0.77296873		FALSE	0	SDCBP	3976724	0.07148403
275	4.17850819	5.68E-04	0.23931986	0.01282051	13	8	FALSE	AKR1C2	3.92307692	13	0	0	0.71104471	mRNAdown	FALSE	0	AKR1C2	1302524	0.1025641
276	3.95152722	6.59E-05	0.25306671	0	3	7	FALSE	IPO8	63.66666667	3	0	0	0.73167934		FALSE	0	IPO8	116604	0.33873874
278	3.91423196	6.45E-05	0.25547796	0	5	8	FALSE	LAMTOR5	27.2	5	0	0	0.73506982		FALSE	0	LAMTOR5	122676	0.20793651
280	3.81319168	5.09E-05	0.2622475	0	3	8	FALSE	MIF	124	3	0	0	0.7442553		FALSE	0	MIF	164934	0.33884298
282	5.17839752	0	0.19310993	0	1	9	FALSE	ZFP1	13	1	0	0	0.62014568		FALSE	0	ZFP1	0	0
284	3.88036742	7.17E-04	0.25770755	0.04761905	7	8	FALSE	AKR1C1	13.14285714	7	0	0	0.73814842	mRNAdown	FALSE	0	AKR1C1	1588900	0.14795918
286	4.12118194	9.97E-06	0.24264884	0	2	7	FALSE	C11orf54	15.5	2	0	0	0.71625619		FALSE	0	C11orf54	34850	0.5
288	5.17839752	0	0.19310993	0	1	9	FALSE	AKR1C4	13	1	0	0	0.62014568		FALSE	0	AKR1C4	0	0
290	4.78397521	0	0.20903118	1	2	9	FALSE	AKR1C3	10	2	0	0	0.65600225		FALSE	0	AKR1C3	0	0.55555556
292	4.75409473	0	0.21034499	0	1	8	FALSE	ANKRD20A1	8	1	0	0	0.65871866	mRNAup	FALSE	0	ANKRD20A1	0	0
293	3.7542054	2.80E-04	0.26636795	0.10714286	8	7	FALSE	NFATC1	76.625	8	0	0	0.74961769		FALSE	0	NFATC1	821354	0.15255511
295	4.29305002	2.27E-06	0.23293463	0	2	8	FALSE	ANKRD22	10	2	0	0	0.70063182	mRNAup	FALSE	0	ANKRD22	5352	0.52941176
296	3.29858344	0.00156833	0.30316044	0.00735294	17	7	FALSE	HDAC3	119.4117647	17	0	0	0.79103787		FALSE	0	HDAC3	3483560	0.07205435
298	3.1002656	7.46E-04	0.32255301	0.05494505	14	6	FALSE	ANKS1B	60.14285714	14	0	0	0.80906676	mRNAdown	FALSE	0	ANKS1B	991498	0.09015152
301	4.10015494	0	0.24389322	0	1	7	FALSE	ITGB7	14	1	0	0	0.71816773		FALSE	0	ITGB7	0	0
303	2.98052236	0.0051551	0.33551166	0.02696986	62	7	FALSE	ITGB2	30.25806452	62	0	0	0.81995251	mRNAup	FALSE	0	ITGB2	5707552	0.02420664
305	3.64475432	6.11E-05	0.27436692	0.13333333	6	7	FALSE	ITGB3	99.33333333	6	0	0	0.75956779		FALSE	0	ITGB3	110374	0.19839679
307	3.89154493	1.18E-04	0.25696735	0.04761905	7	7	FALSE	LRP2	31.14285714	7	0	0	0.73713228		FALSE	0	LRP2	155072	0.16359447
309	3.55998229	8.47E-04	0.28090027	0.04761905	15	7	FALSE	ITGB1	61.26666667	15	0	0	0.76727434		FALSE	0	ITGB1	1109718	0.0781491
311	3.96436476	5.07E-06	0.25224722	0	3	7	FALSE	EPHA8	23	3	0	0	0.73051229		FALSE	0	EPHA8	12260	0.33333333
313	2.98671979	0.01086052	0.33481547	0.01115545	149	7	FALSE	ANLN	13.15436242	149	0	0	0.81938911	mRNAup	FALSE	0	ANLN	18683314	0.01257895
314	3.66157592	1.62E-04	0.27310645	0.14285714	8	7	FALSE	PPP1CB	104.125	8	0	0	0.75803855		FALSE	0	PPP1CB	348848	0.15917819
316	3.6479637	9.53E-04	0.27412553	0.06666667	6	7	FALSE	SSFA2	141.5	6	0	0	0.75927603		FALSE	0	SSFA2	1215150	0.19109
318	3.43691899	7.79E-04	0.29095827	0.02205882	17	7	FALSE	SNW1	86.29411765	17	0	0	0.77846191		FALSE	0	SNW1	1425934	0.07448933
320	2.7955954	0.03364977	0.35770555	0.01333197	243	6	FALSE	LYN	19.53497942	243	0	0	0.83676405	mRNAup	FALSE	0	LYN	43635306	0.00893141
322	3.85967242	6.89E-06	0.25908935	0	2	8	FALSE	ARPC5	174	2	0	0	0.74002978		FALSE	0	ARPC5	30728	0.51488095
324	3.73240372	4.43E-05	0.26792386	0	4	8	FALSE	SORBS2	143.5	4	0	0	0.75159966		FALSE	0	SORBS2	119900	0.2673546
326	3.76328021	1.90E-05	0.26572563	0.16666667	4	7	FALSE	ARPC4	112.5	4	0	0	0.74879271		FALSE	0	ARPC4	52426	0.33234421
328	3.20639664	0.00162663	0.31187657	0.01169591	19	7	FALSE	ACTG1	157.5789474	19	0	0	0.79941849		FALSE	0	ACTG1	4586664	0.07488621
330	3.08366534	2.51E-04	0.32428941	0.19166667	16	8	FALSE	ARHGAP11A	78.1875	16	0	0	0.81057588	mRNAup	FALSE	0	ARHGAP11A	565672	0.08031121
332	3.66888004	7.36E-04	0.27256274	0.025	16	7	FALSE	PPP1CA	48.0625	16	0	0	0.75737454		FALSE	0	PPP1CA	1515160	0.07848837
334	3.38313413	4.11E-04	0.29558391	0.06666667	10	7	FALSE	ACTN4	174.7	10	0	0	0.78335144		FALSE	0	ACTN4	953642	0.12498205
336	3.84716689	1.09E-04	0.25993154	0	6	7	FALSE	TCEA2	49.5	6	0	0	0.74116665		FALSE	0	TCEA2	119444	0.16958042
338	3.87383798	0	0.25814193	1	2	8	FALSE	TPRN	161	2	0	0	0.738742		FALSE	0	TPRN	0	0.70305677
340	3.81164232	1.43E-05	0.2623541	0	2	8	FALSE	CIT	225	2	0	0	0.74439615		FALSE	0	CIT	53388	0.51141553
342	3.76781762	1.68E-04	0.26540563	0.1	5	8	FALSE	WDR1	88.2	5	0	0	0.74838022		FALSE	0	WDR1	425882	0.2568915
344	3.87383798	0	0.25814193	1	2	8	FALSE	H7BYY1	161	2	0	0	0.738742		FALSE	0	H7BYY1	0	0.70305677
346	3.98395308	8.40E-07	0.25100697	0	2	8	FALSE	FEM1A	76.5	2	0	0	0.72873154		FALSE	0	FEM1A	836	0.50333333
350	3.44289509	4.30E-04	0.29045323	0.05454545	11	7	FALSE	AP2B1	161.3636364	11	0	0	0.77791863		FALSE	0	AP2B1	1522518	0.11287028
352	3.32315184	4.14E-04	0.30091914	0.05555556	9	7	FALSE	PLEC	222.7777778	9	0	0	0.78880438		FALSE	0	PLEC	1493806	0.13804295
354	3.79194334	7.60E-05	0.26371702	0.19047619	7	7	FALSE	MYO18A	65.42857143	7	0	0	0.74618697		FALSE	0	MYO18A	270634	0.20061728
356	3.666556	1.40E-04	0.2727355	0.06666667	6	8	FALSE	AP2A1	129.1666667	6	0	0	0.75758582		FALSE	0	AP2A1	390546	0.20172684
358	3.49169987	1.39E-04	0.28639346	0.0952381	7	8	FALSE	SPTBN1	219	7	0	0	0.77348183		FALSE	0	SPTBN1	643034	0.18263258
361	3.583444	4.13E-04	0.27906115	0.02222222	10	8	FALSE	TPM3	112.8	10	0	0	0.76514145		FALSE	0	TPM3	1102090	0.12403101
363	3.62549801	1.06E-04	0.27582418	0	4	7	FALSE	UACA	224.75	4	0	0	0.76131836		FALSE	0	UACA	365016	0.26510664
365	3.75719345	1.11E-04	0.26615611	0	4	8	FALSE	CALML3	148.25	4	0	0	0.74934605		FALSE	0	CALML3	192754	0.26061947
367	3.8481629	9.92E-06	0.25986426	0.33333333	3	8	FALSE	CLINT1	119	3	0	0	0.7410761		FALSE	0	CLINT1	20346	0.45817246
369	3.80931828	3.06E-05	0.26251416	0.33333333	3	8	FALSE	NEXN	173.3333333	3	0	0	0.74460743		FALSE	0	NEXN	97778	0.4178744
371	3.87383798	0	0.25814193	1	2	8	FALSE	PLEKHG3	161	2	0	0	0.738742		FALSE	0	PLEKHG3	0	0.70305677
373	3.87383798	0	0.25814193	1	2	8	FALSE	MICAL3	161	2	0	0	0.738742		FALSE	0	MICAL3	0	0.70305677
375	3.95241257	9.86E-06	0.25301002	0	2	8	FALSE	TNFAIP1	88	2	0	0	0.73159886		FALSE	0	TNFAIP1	8192	0.50289017
377	3.98660912	0	0.25083974	0	1	8	FALSE	43534	149	1	0	0	0.72849008		FALSE	0	43534	0	0
379	3.64088092	7.73E-05	0.2746588	0.1	5	7	FALSE	ARPC2	157.6	5	0	0	0.75991992		FALSE	0	ARPC2	214954	0.24116743
381	3.84019478	1.19E-05	0.26040346	0.33333333	3	8	FALSE	CORO2A	122.6666667	3	0	0	0.74180047		FALSE	0	CORO2A	21770	0.45308642
383	3.80876494	1.31E-05	0.2625523	0	2	8	FALSE	ARHGEF17	222.5	2	0	0	0.74465773		FALSE	0	ARHGEF17	49854	0.51392111
385	3.8166224	3.94E-06	0.26201177	0.33333333	3	8	FALSE	MYL6B	144	3	0	0	0.74394342		FALSE	0	MYL6B	26966	0.47103825
387	3.87383798	0	0.25814193	1	2	8	FALSE	MISP	161	2	0	0	0.738742		FALSE	0	MISP	0	0.70305677
389	3.87383798	0	0.25814193	1	2	8	FALSE	AFAP1	161	2	0	0	0.738742		FALSE	0	AFAP1	0	0.70305677
391	3.45905268	4.73E-04	0.28909649	0.02564103	13	7	FALSE	NR3C1	95	13	0	0	0.77644976		FALSE	0	NR3C1	987836	0.08888567
393	3.78740593	1.50E-05	0.26403296	0.33333333	4	7	FALSE	DAB2	104.25	4	0	0	0.74659946		FALSE	0	DAB2	31754	0.33629032
395	2.9354803	0.01479984	0.34065975	0.01068692	173	8	FALSE	MYO19	13.35260116	173	0	0	0.82404725	mRNAup	FALSE	0	MYO19	18679902	0.00917023
397	3.66965471	8.56E-05	0.2725052	0.16666667	4	7	FALSE	FLII	206.75	4	0	0	0.75730412		FALSE	0	FLII	258002	0.29464286
399	3.66888004	7.08E-05	0.27256274	0.16666667	4	8	FALSE	PIK3C2A	222.25	4	0	0	0.75737454		FALSE	0	PIK3C2A	349534	0.30335157
401	3.87383798	0	0.25814193	1	2	8	FALSE	MYLK	161	2	0	0	0.738742		FALSE	0	MYLK	0	0.70305677
403	3.4747676	2.05E-04	0.28778903	0.13333333	6	7	FALSE	FLNB	245.3333333	6	0	0	0.77502113		FALSE	0	FLNB	678082	0.19970092
405	3.77456839	9.33E-05	0.26493095	0.04761905	7	8	FALSE	EPS15	72	7	0	0	0.74776651		FALSE	0	EPS15	212858	0.18612458
407	3.43216025	3.76E-04	0.29136169	0.12727273	11	7	FALSE	ACTR2	154.2727273	11	0	0	0.77889452		FALSE	0	ACTR2	743744	0.11323529
409	3.57536521	3.00E-04	0.27969171	0.03636364	11	8	FALSE	CFL1	110.8181818	11	0	0	0.76587589		FALSE	0	CFL1	798558	0.11709014
411	3.98660912	0	0.25083974	0	1	8	FALSE	E7EW69	149	1	0	0	0.72849008		FALSE	0	E7EW69	0	0
413	3.98660912	0	0.25083974	0	1	8	FALSE	ZWILCH	149	1	0	0	0.72849008		FALSE	0	ZWILCH	0	0
415	3.61088977	6.89E-05	0.27694005	0.16666667	4	8	FALSE	ARHGAP21	246.75	4	0	0	0.76264638		FALSE	0	ARHGAP21	348328	0.30552109
417	3.37594068	0.00112639	0.29621374	0.03030303	12	8	FALSE	AP2M1	144.8333333	12	0	0	0.78400539		FALSE	0	AP2M1	2228878	0.10061685
419	3.72576361	3.33E-05	0.26840135	0.33333333	3	8	FALSE	ST5	206	3	0	0	0.75220331		FALSE	0	ST5	108378	0.40406025
421	3.49313856	2.87E-04	0.2862755	0.13333333	6	7	FALSE	SVIL	175.6666667	6	0	0	0.77335104		FALSE	0	SVIL	478562	0.18957431
423	3.54703409	7.91E-05	0.28192568	0.2	5	8	FALSE	MYL12A	245.6	5	0	0	0.76845145		FALSE	0	MYL12A	297468	0.2444666
425	3.4438911	9.88E-04	0.29036923	0.004329	22	7	FALSE	CDC5L	72.81818182	22	0	0	0.77782808		FALSE	0	CDC5L	2502174	0.05982453
427	3.98660912	0	0.25083974	0	1	8	FALSE	SORD	149	1	0	0	0.72849008		FALSE	0	SORD	0	0
429	3.72742364	9.50E-05	0.26828182	0.06666667	6	7	FALSE	ARPC3	87.83333333	6	0	0	0.7520524		FALSE	0	ARPC3	134328	0.21846282
431	3.98660912	0	0.25083974	0	1	8	FALSE	J3QRU1	149	1	0	0	0.72849008		FALSE	0	J3QRU1	0	0
433	3.90836653	1.35E-05	0.25586137	0	2	7	FALSE	APOB	109.5	2	0	0	0.73560304		FALSE	0	APOB	23502	0.50465116
435	3.55965029	7.79E-05	0.28092647	0.3	5	7	FALSE	CORO1B	245.8	5	0	0	0.76730452		FALSE	0	CORO1B	198326	0.23390476
437	3.7310757	3.83E-05	0.26801922	0.16666667	4	7	FALSE	TWF1	124.75	4	0	0	0.75172039		FALSE	0	TWF1	81176	0.31940874
439	3.72576361	3.33E-05	0.26840135	0.33333333	3	8	FALSE	ABLIM1	206	3	0	0	0.75220331		FALSE	0	ABLIM1	108378	0.40406025
441	3.25	0.00214676	0.30769231	0.01994302	27	7	FALSE	CALM3	94.11111111	27	0	0	0.79545455		FALSE	0	CALM3	6291768	0.0513431
443	3.55976096	2.74E-04	0.28091774	0.03571429	8	7	FALSE	PPP1R12A	145.125	8	0	0	0.76729446		FALSE	0	PPP1R12A	758450	0.15778689
445	3.87383798	0	0.25814193	1	2	8	FALSE	COBL	161	2	0	0	0.738742		FALSE	0	COBL	0	0.70305677
447	3.79714475	7.17E-05	0.26335578	0.16666667	4	8	FALSE	PPP1R12B	100	4	0	0	0.74571411		FALSE	0	PPP1R12B	64750	0.33056478
449	3.92474546	3.01E-06	0.25479359	0	2	8	FALSE	DST	102.5	2	0	0	0.73411405		FALSE	0	DST	12048	0.51262626
451	3.09705622	0.00396659	0.32288726	0.0242915	39	8	FALSE	ITPR3	29.51282051	39	0	0	0.80935853	mRNAup	FALSE	0	ITPR3	4101974	0.03829105
453	3.51715361	2.34E-04	0.28432082	0.04761905	7	7	FALSE	EEF1D	163	7	0	0	0.77116785		FALSE	0	EEF1D	590790	0.16115761
455	3.13767154	0.00651196	0.31870767	0.00680272	49	7	FALSE	MYC	61.20408163	49	0	0	0.80566622		FALSE	0	MYC	13309198	0.02856372
457	3.42806552	3.14E-04	0.29170971	0.14285714	8	7	FALSE	ACTR3	208.625	8	0	0	0.77926677		FALSE	0	ACTR3	905334	0.14969468
461	3.79869411	2.16E-05	0.26324836	0.33333333	3	8	FALSE	CPM	121.6666667	3	0	0	0.74557326		FALSE	0	CPM	21068	0.44938272
463	3.68824701	6.99E-05	0.27113151	0.33333333	3	7	FALSE	INF2	252.6666667	3	0	0	0.75561391		FALSE	0	INF2	195502	0.38524173
465	3.62173528	2.47E-05	0.27611074	0.16666667	4	7	FALSE	43715	228.5	4	0	0	0.76166043		FALSE	0	43715	81920	0.26729191
467	3.98660912	0	0.25083974	0	1	8	FALSE	43714	149	1	0	0	0.72849008		FALSE	0	43714	0	0
469	3.87383798	0	0.25814193	1	2	8	FALSE	ZBTB20	161	2	0	0	0.738742		FALSE	0	ZBTB20	0	0.70305677
471	3.60104028	3.22E-04	0.27769753	0.13888889	9	8	FALSE	CAPZA2	100.5555556	9	0	0	0.76354179		FALSE	0	CAPZA2	476744	0.13586957
473	3.52788845	1.84E-04	0.28345567	0.04761905	7	8	FALSE	CAPZA1	195	7	0	0	0.77019196		FALSE	0	CAPZA1	709814	0.18468224
475	3.74324923	2.66E-05	0.26714759	0.33333333	3	8	FALSE	MYO1E	136.3333333	3	0	0	0.75061371		FALSE	0	MYO1E	37110	0.43450479
477	3.23705179	0.00145282	0.30892308	0.06493506	22	7	FALSE	FLNA	129.9545455	22	0	0	0.79663166		FALSE	0	FLNA	3775534	0.06874849
479	3.59617087	1.93E-05	0.27807355	0.33333333	4	8	FALSE	MYO1B	272	4	0	0	0.76398447		FALSE	0	MYO1B	112984	0.30329241
481	3.29459938	5.44E-04	0.30352704	0.07272727	11	7	FALSE	ACTN1	198.3636364	11	0	0	0.79140006		FALSE	0	ACTN1	1639398	0.11561554
483	3.88169544	2.57E-05	0.25761939	0	3	8	FALSE	NUMB	78.33333333	3	0	0	0.73802769		FALSE	0	NUMB	29910	0.33770015
485	3.57403718	3.46E-05	0.27979563	0.33333333	4	8	FALSE	TPM4	294.25	4	0	0	0.76599662		FALSE	0	TPM4	198180	0.3006135
487	3.7250996	8.97E-05	0.2684492	0	5	7	FALSE	LMO7	125.6	5	0	0	0.75226367		FALSE	0	LMO7	203706	0.21262799
489	3.49701195	1.05E-04	0.28595842	0.1	5	8	FALSE	43710	294	5	0	0	0.77299891		FALSE	0	43710	474782	0.22939797
491	3.98660912	0	0.25083974	0	1	8	FALSE	TRIOBP	149	1	0	0	0.72849008		FALSE	0	TRIOBP	0	0
493	3.18116423	0.00915314	0.31435032	0.00324675	56	7	FALSE	NRF1	49.26785714	56	0	0	0.80171234		FALSE	0	NRF1	22879220	0.0241027
495	3.86133245	5.84E-05	0.25897796	0	5	7	FALSE	CAMK2G	56.6	5	0	0	0.73987887		FALSE	0	CAMK2G	66202	0.20746269
497	3.87383798	0	0.25814193	1	2	8	FALSE	H0YEF7	161	2	0	0	0.738742		FALSE	0	H0YEF7	0	0.70305677
499	3.44046038	3.66E-04	0.29065878	0.09090909	11	7	FALSE	DBN1	127.7272727	11	0	0	0.77813997		FALSE	0	DBN1	1022750	0.11817338
501	3.71392209	2.09E-05	0.26925713	0.33333333	3	8	FALSE	ARPC5L	230.3333333	3	0	0	0.75327981		FALSE	0	ARPC5L	131164	0.40636042
503	3.70872067	2.65E-04	0.26963476	0.06666667	6	7	FALSE	PICALM	101.1666667	6	0	0	0.75375267		FALSE	0	PICALM	501364	0.20262097
505	3.83078796	8.30E-05	0.2610429	0	5	7	FALSE	CEP162	67.8	5	0	0	0.74265564		FALSE	0	CEP162	97746	0.20745342
507	3.39353696	2.08E-04	0.2946778	0.14285714	8	7	FALSE	MYL6	265.125	8	0	0	0.78240573		FALSE	0	MYL6	1158626	0.16852323
509	3.60535635	2.69E-04	0.27736509	0	5	8	FALSE	CLIC1	191.4	5	0	0	0.76314942		FALSE	0	CLIC1	547958	0.21784897
511	3.69610447	1.51E-04	0.27055512	0.06666667	6	7	FALSE	TMOD1	94.33333333	6	0	0	0.75489959		FALSE	0	TMOD1	171078	0.20861173
513	3.71779548	7.79E-05	0.2689766	0.06666667	6	8	FALSE	CAPZB	116.5	6	0	0	0.75292768		FALSE	0	CAPZB	205046	0.21814187
515	3.8856795	1.25E-04	0.25735524	0	4	7	FALSE	ELP3	74.75	4	0	0	0.7376655		FALSE	0	ELP3	291822	0.25431034
517	3.87383798	0	0.25814193	1	2	8	FALSE	SPECC1	161	2	0	0	0.738742		FALSE	0	SPECC1	0	0.70305677
519	3.71392209	2.09E-05	0.26925713	0.33333333	3	8	FALSE	CLTB	230.3333333	3	0	0	0.75327981		FALSE	0	CLTB	131164	0.40636042
521	3.8166224	3.94E-06	0.26201177	0.33333333	3	8	FALSE	BASP1	144	3	0	0	0.74394342		FALSE	0	BASP1	26966	0.47103825
523	3.98660912	0	0.25083974	0	1	8	FALSE	E9PEB9	149	1	0	0	0.72849008		FALSE	0	E9PEB9	0	0
525	3.92950421	2.66E-06	0.25448503	0	2	8	FALSE	MMGT1	83	2	0	0	0.73368144		FALSE	0	MMGT1	4346	0.50306748
527	3.83322266	5.53E-06	0.2608771	0.33333333	3	7	FALSE	SIPA1	130.3333333	3	0	0	0.7424343		FALSE	0	SIPA1	26076	0.46099291
529	3.84594954	2.86E-05	0.26001381	0.16666667	4	8	FALSE	STON2	95	4	0	0	0.74127731		FALSE	0	STON2	45046	0.33992806
531	3.33444002	0.00112031	0.29990043	0.02614379	18	7	FALSE	CLTC	119.9444444	18	0	0	0.78777818		FALSE	0	CLTC	2791232	0.07679108
533	3.81850376	1.54E-05	0.26188268	0.33333333	3	8	FALSE	TPM2	121.6666667	3	0	0	0.74377239		FALSE	0	TPM2	17496	0.45105328
535	3.13169544	0.00315804	0.31931585	0.01515152	33	7	FALSE	SUMO1	97.12121212	33	0	0	0.80620951		FALSE	0	SUMO1	8009416	0.04402438
537	3.87383798	0	0.25814193	1	2	8	FALSE	SSH2	161	2	0	0	0.738742		FALSE	0	SSH2	0	0.70305677
539	3.25243471	0.00480873	0.30746198	0.0505279	52	7	FALSE	FYN	56.28846154	52	0	0	0.79523321		FALSE	0	FYN	7055230	0.03034188
542	3.98660912	0	0.25083974	0	1	8	FALSE	BLMH	149	1	0	0	0.72849008		FALSE	0	BLMH	0	0
544	3.58266932	1.97E-04	0.27912149	0.06666667	6	7	FALSE	MPRIP	164.3333333	6	0	0	0.76521188		FALSE	0	MPRIP	475872	0.20280876
546	3.64497565	9.82E-06	0.27435026	0	2	8	FALSE	MEN1	402.5	2	0	0	0.75954767		FALSE	0	MEN1	43806	0.51739691
548	3.98660912	0	0.25083974	0	1	8	FALSE	UBAP2L	149	1	0	0	0.72849008		FALSE	0	UBAP2L	0	0
550	3.80765826	1.65E-05	0.26262861	0.16666667	4	8	FALSE	SPECC1L	116	4	0	0	0.74475834		FALSE	0	SPECC1L	53310	0.3489426
552	3.61299247	1.43E-04	0.27677888	0	4	8	FALSE	MRPL38	220.75	4	0	0	0.76245523		FALSE	0	MRPL38	201246	0.26129608
554	3.87383798	0	0.25814193	1	2	8	FALSE	LUZP1	161	2	0	0	0.738742		FALSE	0	LUZP1	0	0.70305677
556	3.75464807	3.40E-05	0.26633655	0.4	6	8	FALSE	SYNPO	79.16666667	6	0	0	0.74957745		FALSE	0	SYNPO	109410	0.23303835
558	3.6812749	1.77E-04	0.27164502	0.1	5	8	FALSE	CLTA	164.8	5	0	0	0.75624774		FALSE	0	CLTA	329344	0.2393586
560	3.98660912	0	0.25083974	0	1	8	FALSE	AAK1	149	1	0	0	0.72849008		FALSE	0	AAK1	0	0
562	3.89298362	3.76E-06	0.25687239	0	2	8	FALSE	ANPEP	152	2	0	0	0.73700149	mRNAup	FALSE	0	ANPEP	4606	0.50166113
563	3.16533865	2.75E-04	0.31592196	0	8	8	FALSE	TM4SF1	72.875	8	0	0	0.80315103	mRNAup	FALSE	0	TM4SF1	552244	0.14461771
565	4.24546259	0	0.23554559	0	1	8	FALSE	AOAH	87	1	0	0	0.70495795	mRNAup	FALSE	0	AOAH	0	0
566	3.24557326	0.00752055	0.30811198	0.00668271	87	7	FALSE	IGHG1	9.14942529	87	0	0	0.79585698	mRNAup	FALSE	0	IGHG1	8432790	0.02116906
568	3.05090748	9.72E-04	0.32777133	0.03508772	19	8	FALSE	APMAP	73.36842105	19	0	0	0.81355387	mRNAup	FALSE	0	APMAP	1154146	0.06275828
569	4.05079681	0	0.24686501	0	1	9	FALSE	RASA4	19	1	0	0	0.72265484		FALSE	0	RASA4	0	0
571	3.81728641	7.09E-06	0.2619662	0	3	8	FALSE	HNRNPDL	99	3	0	0	0.74388305		FALSE	0	HNRNPDL	20410	0.36296296
573	3.42297477	3.50E-04	0.29214355	0.17857143	8	7	FALSE	SRPK1	216.25	8	0	0	0.77972957		FALSE	0	SRPK1	1340986	0.14774282
575	3.10469234	0.00306706	0.32209311	0.01422475	38	8	FALSE	CLGN	25.89473684	38	0	0	0.80866433	mRNAdown	FALSE	0	CLGN	3109746	0.03220487
578	3.45495795	8.58E-04	0.28943912	0.03267974	18	7	FALSE	SMAD3	70.05555556	18	0	0	0.776822		FALSE	0	SMAD3	1966680	0.07066078
580	3.45185923	6.17E-04	0.28969895	0.01282051	13	7	FALSE	CANX	89.84615385	13	0	0	0.77710371		FALSE	0	CANX	955164	0.08674464
583	3.6230633	0.00146028	0.27600953	0	24	8	FALSE	APOD	9.70833333	24	0	0	0.7615397	mRNAup	FALSE	0	APOD	4472338	0.05476939
584	3.5270031	4.34E-04	0.28352683	0.04444444	10	7	FALSE	VAPA	101.4	10	0	0	0.77027245		FALSE	0	VAPA	713688	0.11238839
586	3.98849048	2.99E-05	0.25072142	0	4	7	FALSE	APOA2	29.25	4	0	0	0.72831905		FALSE	0	APOA2	70102	0.25917431
588	3.68182824	9.70E-04	0.2716042	0.01904762	15	7	FALSE	A2M	42.73333333	15	0	0	0.75619743		FALSE	0	A2M	2136174	0.07526882
590	4.52202302	1.02E-06	0.22113996	0	2	9	FALSE	GRINL1A	17	2	0	0	0.67981609		FALSE	0	GRINL1A	2256	0.53333333
592	3.79670208	1.70E-04	0.26338648	0	11	7	FALSE	CREB3	26.81818182	11	0	0	0.74575436		FALSE	0	CREB3	260454	0.09892024
594	4.62295263	0	0.21631197	0	1	9	FALSE	A8KA83	24	1	0	0	0.67064067		FALSE	0	A8KA83	0	0
600	3.10258964	0.00440173	0.3223114	0.02702703	38	7	FALSE	SUMO2	96.94736842	38	0	0	0.80885549		FALSE	0	SUMO2	8288832	0.03856352
604	3.46159805	5.86E-04	0.28888392	0.05454545	11	8	FALSE	IQGAP1	133.7272727	11	0	0	0.77621836		FALSE	0	IQGAP1	1016156	0.10715854
607	3.20285525	5.20E-06	0.31222142	0	2	8	FALSE	ARL11	235	2	0	0	0.79974043	mRNAup	FALSE	0	ARL11	16506	0.50869565
609	4.97908367	0.00110644	0.20084017	0	6	8	FALSE	ASIP	1.5	6	0	0	0.63826512	mRNAdown	FALSE	0	ASIP	778060	0.16666667
610	5.978973	0	0.1672528	0	1	9	FALSE	MC3R	6	1	0	0	0.54736609		FALSE	0	MC3R	0	0
612	5.978973	0	0.1672528	0	1	9	FALSE	MC1R	6	1	0	0	0.54736609		FALSE	0	MC1R	0	0
614	5.978973	0	0.1672528	0	1	9	FALSE	MC4R	6	1	0	0	0.54736609		FALSE	0	MC4R	0	0
616	3.07459053	0.00431235	0.32524656	0.0042517	49	7	FALSE	ASPM	21.79591837	49	0	0	0.81140086	mRNAup	FALSE	0	ASPM	5146734	0.02785402
617	3.75011067	1.28E-04	0.2666588	0.08333333	9	7	FALSE	PRKAA1	53.22222222	9	0	0	0.74998994		FALSE	0	PRKAA1	189592	0.12392157
619	3.87760071	1.10E-05	0.25789143	0	2	8	FALSE	F8W118	111	2	0	0	0.73839994		FALSE	0	F8W118	13012	0.50458716
621	3.53497123	5.69E-04	0.28288773	0	8	7	FALSE	RCN2	180	8	0	0	0.76954807		FALSE	0	RCN2	1295970	0.16169828
623	3.895529	2.49E-05	0.25670455	0	4	7	FALSE	CALU	46.5	4	0	0	0.73677009		FALSE	0	CALU	34002	0.26
625	4.02556441	1.40E-05	0.24841237	0	2	8	FALSE	RPP38	48	2	0	0	0.72494869		FALSE	0	RPP38	4904	0.5
627	3.80101815	2.46E-05	0.2630874	0	4	7	FALSE	RCN1	61.25	4	0	0	0.74536199		FALSE	0	RCN1	41436	0.25638298
629	3.5498008	3.45E-04	0.28170595	0.02777778	9	7	FALSE	NUMA1	149.2222222	9	0	0	0.76819993		FALSE	0	NUMA1	1025740	0.13581376
631	3.59428951	1.40E-04	0.2782191	0	6	7	FALSE	CDK4	126.1666667	6	0	0	0.7641555		FALSE	0	CDK4	284760	0.17703913
633	3.833112	1.33E-04	0.26088463	0	8	8	FALSE	PLK1	41.875	8	0	0	0.74244436		FALSE	0	PLK1	259948	0.13670569
636	4.0080788	1.66E-05	0.24949609	0	4	7	FALSE	LIMS1	24.75	4	0	0	0.72653829		FALSE	0	LIMS1	39752	0.25537634
638	3.02999115	0.00366697	0.33003397	0.03743316	34	7	FALSE	p53	123.7058824	34	0	0	0.81545535		FALSE	0	p53	10310464	0.04423361
640	4.02954847	3.60E-06	0.24816676	0	3	7	FALSE	CRYZ	25	3	0	0	0.7245865		FALSE	0	CRYZ	4550	0.34782609
642	3.62660469	3.10E-04	0.27574001	0	10	7	FALSE	RPS6KA1	74.6	10	0	0	0.76121776		FALSE	0	RPS6KA1	689312	0.11219512
644	4.05810093	1.29E-05	0.24642068	0	2	8	FALSE	CEP78	27.5	2	0	0	0.72199082		FALSE	0	CEP78	39060	0.5
646	3.70540062	1.15E-04	0.26987635	0	5	7	FALSE	MTOR	82.6	5	0	0	0.75405449		FALSE	0	MTOR	135582	0.20763359
649	4.03275786	3.05E-06	0.24796926	0	2	8	FALSE	ELL	32.5	2	0	0	0.72429474		FALSE	0	ELL	2838	0.50806452
651	3.7896193	2.64E-05	0.26387875	0	3	8	FALSE	PACS2	141.3333333	3	0	0	0.74639825		FALSE	0	PACS2	66166	0.34311328
653	4.07447986	0	0.2454301	0	1	8	FALSE	C9JA28	49	1	0	0	0.72050183		FALSE	0	C9JA28	0	0
655	3.67419212	6.23E-05	0.27216867	0	4	7	FALSE	CENPB	161	4	0	0	0.75689163		FALSE	0	CENPB	139450	0.2601626
657	3.70108455	2.59E-04	0.27019107	0	6	7	FALSE	IPO7	123.3333333	6	0	0	0.75444686		FALSE	0	IPO7	366888	0.1745126
659	3.67718017	2.18E-04	0.27194751	0.06666667	6	7	FALSE	EIF6	124.1666667	6	0	0	0.75661998		FALSE	0	EIF6	748400	0.18460389
661	3.67120407	2.11E-05	0.2723902	0	2	8	FALSE	PSMD8	352.5	2	0	0	0.75716327		FALSE	0	PSMD8	41412	0.50502874
664	4.07447986	0	0.2454301	0	1	8	FALSE	B4DLN1	49	1	0	0	0.72050183		FALSE	0	B4DLN1	0	0
666	3.20064188	1.60E-04	0.31243733	0	2	8	FALSE	ATP6V0A4	231	2	0	0	0.79994165	mRNAup	FALSE	0	ATP6V0A4	147750	0.5
668	4.15526782	1.88E-06	0.24065837	0	2	9	FALSE	PFKM	19.5	2	0	0	0.71315747		FALSE	0	PFKM	23158	0.5
670	4.01549358	3.46E-04	0.24903539	0	9	8	FALSE	ATP6V0D2	9.55555556	9	0	0	0.72586422	mRNAup	FALSE	0	ATP6V0D2	363502	0.1125731
671	4.35734838	3.74E-06	0.22949737	0	2	7	FALSE	AGO3	13	2	0	0	0.69478651		FALSE	0	AGO3	5146	0.52173913
673	3.42673749	3.41E-04	0.29182276	0.05555556	9	7	FALSE	RPS3	173.3333333	9	0	0	0.7793875		FALSE	0	RPS3	1089712	0.15053763
675	5.01538291	0	0.19938657	0	1	9	FALSE	RBM15B	9	1	0	0	0.63496519		FALSE	0	RBM15B	0	0
677	3.99856131	3.17E-05	0.25008995	0	3	9	FALSE	NDUFB8	42	3	0	0	0.72740352		FALSE	0	NDUFB8	46902	0.33606557
679	3.69057105	8.14E-05	0.27096078	0	2	8	FALSE	ADRM1	332.5	2	0	0	0.75540263		FALSE	0	ADRM1	81880	0.5
681	3.50188136	8.06E-04	0.28556079	0.13960114	27	7	FALSE	BATF	22.40740741	27	0	0	0.77255624	mRNAup	FALSE	0	BATF	909584	0.05362748
682	3.90615317	1.31E-06	0.25600635	0.66666667	4	7	FALSE	CEBPE	94.75	4	0	0	0.73580426		FALSE	0	CEBPE	3908	0.30271565
684	3.72775564	1.63E-04	0.26825793	0.17777778	10	7	FALSE	ATF4	65	10	0	0	0.75202221		FALSE	0	ATF4	671256	0.12543689
686	3.60258964	2.28E-04	0.2775781	0.05454545	11	7	FALSE	CEBPB	65.09090909	11	0	0	0.76340094		FALSE	0	CEBPB	353896	0.10983556
688	3.46569278	2.23E-04	0.2885426	0.09090909	12	7	FALSE	c-Jun	108.4166667	12	0	0	0.77584611		FALSE	0	c-Jun	757574	0.10889674
691	3.47587428	0.00107443	0.2876974	0.02197802	14	7	FALSE	KDM1A	97.71428571	14	0	0	0.77492052		FALSE	0	KDM1A	2021994	0.08050546
693	2.94344843	0.02578955	0.33973756	0.00468043	226	6	FALSE	FOS	11.09292035	226	0	0	0.82332287	mRNAup	FALSE	0	FOS	50004674	0.01026461
695	3.854471	4.86E-04	0.25943897	0.14285714	14	8	FALSE	HLF	13	14	0	0	0.74050264	mRNAdown	FALSE	0	HLF	1751962	0.12394958
697	3.66733068	2.84E-05	0.27267789	0	2	8	FALSE	SNAPC5	341.5	2	0	0	0.75751539		FALSE	0	SNAPC5	24616	0.50073529
699	3.05588756	0.00413418	0.32723717	0.02987013	56	7	FALSE	JUNB	24.28571429	56	0	0	0.81310113	mRNAup	FALSE	0	JUNB	4972930	0.02658597
701	3.82193448	1.46E-04	0.2616476	0.33333333	7	7	FALSE	CREB5	88.14285714	7	0	0	0.7434605		FALSE	0	CREB5	454804	0.16993645
703	3.82625055	8.73E-05	0.26135246	0	6	7	FALSE	GOPC	35.33333333	6	0	0	0.74306813		FALSE	0	GOPC	164642	0.17606838
705	3.82658256	7.34E-05	0.26132979	0.38095238	7	7	FALSE	CEBPG	57	7	0	0	0.74303795		FALSE	0	CEBPG	123246	0.17657498
707	3.44477645	9.18E-04	0.2902946	0.04166667	16	7	FALSE	ATF2	79.9375	16	0	0	0.7777476		FALSE	0	ATF2	2089884	0.07489377
709	4.25287738	4.60E-07	0.23513492	0	2	8	FALSE	CEBPD	43	2	0	0	0.70428387		FALSE	0	CEBPD	814	0.54545455
711	4.36077911	0	0.22931682	1	3	8	FALSE	TEF	18.66666667	3	0	0	0.69447463		FALSE	0	TEF	0	0.51851852
713	3.77368305	5.90E-05	0.26499311	0.23809524	7	7	FALSE	JUND	68.57142857	7	0	0	0.747847		FALSE	0	JUND	159084	0.176906
715	3.05245684	0.00361947	0.32760496	0.02035278	67	7	FALSE	ATF3	24.05970149	67	0	0	0.81341301	mRNAup	FALSE	0	ATF3	8924970	0.02938433
717	3.82425852	4.92E-05	0.2614886	0.16666667	9	7	FALSE	CEBPA	50.22222222	9	0	0	0.74324923		FALSE	0	CEBPA	68264	0.13982522
719	3.57447986	3.92E-04	0.27976098	0.2	15	7	FALSE	DBP	44.86666667	15	0	0	0.76595638	mRNAdown	FALSE	0	DBP	430290	0.07756522
721	4.50177069	0	0.22213481	0	1	8	FALSE	ATF5	27	1	0	0	0.68165721		FALSE	0	ATF5	0	0
723	4.50177069	0	0.22213481	0	1	8	FALSE	IFI35	27	1	0	0	0.68165721		FALSE	0	IFI35	0	0
725	3.13601151	0.00248752	0.31887638	0.00645161	31	8	FALSE	BCAT1	21.03225806	31	0	0	0.80581714	mRNAup	FALSE	0	BCAT1	2681356	0.03804017
726	3.64696768	9.48E-05	0.2742004	0	8	7	FALSE	LRIF1	54.5	8	0	0	0.75936657		FALSE	0	LRIF1	178730	0.14005236
729	4.0936255	4.39E-06	0.24428224	0	2	9	FALSE	SNF8	39.5	2	0	0	0.71876132		FALSE	0	SNF8	6200	0.50657895
731	3.86620186	9.52E-05	0.25865178	0	4	8	FALSE	PJA1	90.5	4	0	0	0.73943619		FALSE	0	PJA1	333976	0.25426136
733	3.98395308	1.89E-05	0.25100697	0	3	7	FALSE	SERPINE2	31	3	0	0	0.72873154		FALSE	0	SERPINE2	16324	0.34090909
735	3.93492696	8.27E-06	0.25413432	0	2	8	FALSE	ARNT	102.5	2	0	0	0.73318846		FALSE	0	ARNT	15882	0.50497512
737	3.76394422	6.01E-05	0.26567875	0	5	7	FALSE	PSAP	52.6	5	0	0	0.74873234		FALSE	0	PSAP	59288	0.20722892
740	3.95064188	4.24E-05	0.25312342	0	3	7	FALSE	PRR14L	65.33333333	3	0	0	0.73175983		FALSE	0	PRR14L	37862	0.34402852
742	3.95064188	9.93E-05	0.25312342	0	6	8	FALSE	PRMT6	42.66666667	6	0	0	0.73175983		FALSE	0	PRMT6	268220	0.16937669
744	3.85303232	2.94E-04	0.25953585	0	9	7	FALSE	USP15	36.66666667	9	0	0	0.74063343		FALSE	0	USP15	698052	0.11849391
746	3.90615317	9.86E-05	0.25600635	0	3	8	FALSE	AGL	106	3	0	0	0.73580426		FALSE	0	AGL	72614	0.33546326
748	3.06219566	0.00315655	0.32656306	0.02063492	36	7	FALSE	PER1	30.19444444	36	0	0	0.81252767	mRNAdown	FALSE	0	PER1	3061438	0.03504274
750	4.13590084	0	0.24178529	0	1	9	FALSE	RAB3GAP1	31	1	0	0	0.71491811		FALSE	0	RAB3GAP1	0	0
752	4.13590084	0	0.24178529	0	1	9	FALSE	YEATS2	31	1	0	0	0.71491811		FALSE	0	YEATS2	0	0
754	4.13590084	0	0.24178529	0	1	9	FALSE	FLYWCH2	31	1	0	0	0.71491811		FALSE	0	FLYWCH2	0	0
756	4.07226649	2.04E-05	0.2455635	0	3	7	FALSE	FBXO7	17	3	0	0	0.72070305		FALSE	0	FBXO7	80922	0.34042553
758	4.13590084	0	0.24178529	0	1	9	FALSE	ARID3B	31	1	0	0	0.71491811		FALSE	0	ARID3B	0	0
760	3.83598938	2.20E-05	0.26068894	0	2	7	FALSE	HELZ	233.5	2	0	0	0.74218278		FALSE	0	HELZ	28124	0.50215983
762	3.82259849	4.41E-05	0.26160215	0	3	7	FALSE	TRIP12	170	3	0	0	0.74340014		FALSE	0	TRIP12	69554	0.33867735
764	3.76106684	4.13E-05	0.26588201	0	3	7	FALSE	GTF2F1	154	3	0	0	0.74899392		FALSE	0	GTF2F1	99928	0.34693878
766	4.00652944	1.35E-05	0.24959258	0	2	9	FALSE	EIF4G3	114.5	2	0	0	0.72667914		FALSE	0	EIF4G3	19088	0.50444444
768	3.97642762	1.22E-05	0.25148201	0	3	7	FALSE	TRMT44	45.33333333	3	0	0	0.72941567		FALSE	0	TRMT44	9702	0.34635417
770	3.98837981	3.02E-06	0.25072838	0	2	9	FALSE	PPP2R5D	36.5	2	0	0	0.72832911		FALSE	0	PPP2R5D	4726	0.50714286
772	3.70883134	3.43E-04	0.26962671	0	8	7	FALSE	ATXN2	86.75	8	0	0	0.75374261		FALSE	0	ATXN2	369870	0.13212635
774	3.97941567	5.42E-06	0.25129318	0	2	7	FALSE	ZNHIT2	64.5	2	0	0	0.72914403		FALSE	0	ZNHIT2	7042	0.51626016
776	3.43636565	0.00173536	0.29100512	0.02941176	17	6	FALSE	BDNF	21.41176471	17	0	0	0.77851221	mRNAup	FALSE	0	BDNF	1060294	0.06490872
777	3.98030102	0.00133416	0.25123728	0	4	7	FALSE	F11R	18.25	4	0	0	0.72906354		FALSE	0	F11R	938288	0.25
779	4.04758743	5.19E-06	0.24706075	0	3	7	FALSE	SORT1	11	3	0	0	0.7229466		FALSE	0	SORT1	8220	0.33333333
782	4.25586543	9.51E-06	0.23496984	0	2	7	FALSE	CPE	21.5	2	0	0	0.70401223		FALSE	0	CPE	5628	0.5
784	4.43625498	0	0.22541536	0	1	7	FALSE	CADPS2	17	1	0	0	0.68761318		FALSE	0	CADPS2	0	0
786	3.96757415	1.17E-05	0.25204318	0	2	7	FALSE	INPP5K	63.5	2	0	0	0.73022053		FALSE	0	INPP5K	7194	0.5
790	3.0375166	0.00293971	0.32921631	0.03173077	65	7	FALSE	BID	24.33846154	65	0	0	0.81477122	mRNAup	FALSE	0	BID	6029484	0.02677233
791	3.73616645	2.70E-04	0.26765403	0.04761905	7	8	FALSE	TLE1	80.14285714	7	0	0	0.7512576		FALSE	0	TLE1	972270	0.15453029
793	3.49900398	2.20E-04	0.28579562	0.01818182	11	7	FALSE	RPA1	117.9090909	11	0	0	0.77281782		FALSE	0	RPA1	843128	0.1181543
795	3.26626826	0.00277681	0.30615979	0.04273504	27	7	FALSE	IKBKG	75.03703704	27	0	0	0.79397561		FALSE	0	IKBKG	4987212	0.04762243
797	3.56961045	2.16E-04	0.28014261	0.11111111	10	7	FALSE	MAPK8	90.3	10	0	0	0.76639905		FALSE	0	MAPK8	750998	0.124
799	3.68204958	3.55E-05	0.27158787	0	5	7	FALSE	RBM48	87	5	0	0	0.75617731		FALSE	0	RBM48	100126	0.22513089
801	3.0143869	0.00510801	0.33174242	0.0122177	74	7	FALSE	MCL1	21.02702703	74	0	0	0.81687392	mRNAup	FALSE	0	MCL1	8283134	0.022805
803	3.49878265	6.14E-04	0.2858137	0.14166667	16	7	FALSE	TNFRSF1A	90	16	0	0	0.77283794		FALSE	0	TNFRSF1A	2281230	0.08930348
805	3.68614431	2.35E-04	0.27128618	0.13888889	9	7	FALSE	BCL2	78	9	0	0	0.75580506		FALSE	0	BCL2	731380	0.13363879
807	3.79681275	8.12E-06	0.2633788	0	2	7	FALSE	CRNKL1	250.5	2	0	0	0.7457443		FALSE	0	CRNKL1	33166	0.50814664
809	3.38379814	6.49E-04	0.2955259	0.02941176	17	7	FALSE	GAPDH	108	17	0	0	0.78329108		FALSE	0	GAPDH	2007712	0.07876225
811	3.58886676	1.75E-04	0.27863949	0.01818182	11	7	FALSE	RPA2	77.90909091	11	0	0	0.76464848		FALSE	0	RPA2	473802	0.11370341
813	4.03740593	0	0.24768379	0	1	8	FALSE	PLEKHM1	65	1	0	0	0.72387219		FALSE	0	PLEKHM1	0	0
815	3.80101815	3.88E-05	0.2630874	0	4	8	FALSE	ZHX1	55	4	0	0	0.74536199		FALSE	0	ZHX1	102138	0.27835052
817	3.57436919	3.07E-04	0.27976965	0.07575758	12	7	FALSE	FASLG	75.25	12	0	0	0.76596644		FALSE	0	FASLG	370568	0.1127451
819	3.92563081	1.90E-07	0.25473613	0.66666667	3	7	FALSE	BAK1	52.33333333	3	0	0	0.73403356		FALSE	0	BAK1	724	0.39949109
821	3.88202745	8.15E-05	0.25759735	0	4	8	FALSE	UBQLN2	62	4	0	0	0.7379975		FALSE	0	UBQLN2	65146	0.25523013
823	3.37560868	3.48E-04	0.29624287	0.03921569	18	6	FALSE	BCL2A1	26.66666667	18	0	0	0.78403557	mRNAup	FALSE	0	BCL2A1	398994	0.06513889
825	3.96746348	2.52E-06	0.25205021	0	2	8	FALSE	GBP2	79.5	2	0	0	0.73023059		FALSE	0	GBP2	10762	0.53401361
828	3.72011952	6.20E-05	0.26880857	0.35714286	8	7	FALSE	FADD	88.625	8	0	0	0.75271641		FALSE	0	FADD	122878	0.15974729
830	3.92186808	2.67E-05	0.25498053	0	4	8	FALSE	AHCYL1	57.25	4	0	0	0.73437563		FALSE	0	AHCYL1	56674	0.26658768
832	3.833112	2.01E-06	0.26088463	0.7	5	7	FALSE	TNFRSF10B	82.6	5	0	0	0.74244436		FALSE	0	TNFRSF10B	6066	0.26559486
834	3.82779991	7.79E-05	0.26124668	0	6	8	FALSE	CRMP1	51	6	0	0	0.74292728		FALSE	0	CRMP1	203774	0.18382353
836	3.80168216	2.32E-05	0.26304145	0	5	7	FALSE	C14orf1	52	5	0	0	0.74530162		FALSE	0	C14orf1	78118	0.22566372
838	3.96392209	2.78E-05	0.25227539	0	3	8	FALSE	SETDB1	54.66666667	3	0	0	0.73055254		FALSE	0	SETDB1	66772	0.35540839
840	3.65869854	7.76E-05	0.27332123	0.13888889	9	7	FALSE	BCL2L11	54	9	0	0	0.75830013		FALSE	0	BCL2L11	152760	0.12873932
842	3.45484728	0.00122457	0.2894484	0	17	7	FALSE	YWHAB	82.82352941	17	0	0	0.77683207		FALSE	0	YWHAB	3573810	0.07065935
844	4.03740593	0	0.24768379	0	1	8	FALSE	FBN3	65	1	0	0	0.72387219		FALSE	0	FBN3	0	0
846	3.62848606	2.52E-04	0.27559704	0	7	7	FALSE	TUBB2B	124.8571429	7	0	0	0.76104672		FALSE	0	TUBB2B	496478	0.16851312
848	3.6143205	5.03E-04	0.27667718	0	11	7	FALSE	REL	65.72727273	11	0	0	0.7623345		FALSE	0	REL	1029928	0.09942745
850	3.09849491	5.21E-04	0.32273734	0.06593407	14	6	FALSE	BIK	58.35714286	14	0	0	0.80922774	mRNAup	FALSE	0	BIK	754364	0.08520934
853	3.82558654	2.41E-04	0.26139782	0	5	7	FALSE	NR2F2	77.6	5	0	0	0.7431285		FALSE	0	NR2F2	174474	0.22397661
855	3.65250111	1.01E-04	0.273785	0.1	5	7	FALSE	TANK	126.4	5	0	0	0.75886354		FALSE	0	TANK	188216	0.21916376
859	3.60336432	7.95E-05	0.27751843	0.18095238	15	7	FALSE	CRKL	68.06666667	15	0	0	0.76333052		FALSE	0	CRKL	195930	0.10554692
861	3.77954847	5.17E-05	0.26458187	0.26666667	6	7	FALSE	BCL2L1	76	6	0	0	0.74731378		FALSE	0	BCL2L1	101156	0.19595177
863	2.98627711	0.00632634	0.33486511	0.01736695	85	6	FALSE	SOCS3	22.32941176	85	0	0	0.81942935	mRNAup	FALSE	0	SOCS3	9114664	0.02194343
865	3.95717131	3.34E-05	0.25270576	0	5	7	FALSE	FATE1	17.2	5	0	0	0.73116624		FALSE	0	FATE1	72224	0.20769231
868	3.09915892	0.00175104	0.32266819	0.00885936	43	8	FALSE	BIRC5	23.39534884	43	0	0	0.80916737	mRNAup	FALSE	0	BIRC5	3559700	0.03681539
869	3.78530323	5.65E-05	0.26417963	0	5	7	FALSE	MDC1	89.8	5	0	0	0.74679062		FALSE	0	MDC1	149170	0.23005181
871	3.55234617	2.87E-04	0.2815041	0.01515152	12	7	FALSE	XPO1	82.33333333	12	0	0	0.76796853		FALSE	0	XPO1	722934	0.09622196
873	3.37782205	6.76E-04	0.29604875	0.02564103	13	7	FALSE	H2AFX	154.9230769	13	0	0	0.78383436		FALSE	0	H2AFX	1800506	0.09670881
875	3.60590969	1.33E-04	0.27732253	0	10	7	FALSE	BECN1	72.5	10	0	0	0.76309912		FALSE	0	BECN1	318484	0.11721311
877	3.53917663	1.91E-04	0.28255159	0.13636364	12	7	FALSE	RASA1	107.1666667	12	0	0	0.76916576		FALSE	0	RASA1	528710	0.1159971
879	3.29360336	0.00137715	0.30361883	0.02173913	24	7	FALSE	CDK2	89.16666667	24	0	0	0.7914906		FALSE	0	CDK2	3834762	0.05533854
881	3.58919876	1.80E-04	0.27861371	0	8	7	FALSE	UFD1L	122.875	8	0	0	0.76461829		FALSE	0	UFD1L	492450	0.14024741
883	3.2145861	0.00204492	0.31108204	0.02371542	23	7	FALSE	XRCC6	125.5217391	23	0	0	0.79867399		FALSE	0	XRCC6	4844250	0.05995204
885	3.2145861	9.29E-04	0.31108204	0.02941176	17	7	FALSE	PRKDC	140.7647059	17	0	0	0.79867399		FALSE	0	PRKDC	2796814	0.07759492
887	4.07016379	2.41E-06	0.24569036	0	2	9	FALSE	AIP	34	2	0	0	0.7208942		FALSE	0	AIP	4274	0.50769231
890	3.67906153	2.26E-04	0.27180845	0.03571429	8	8	FALSE	USP9X	76.625	8	0	0	0.75644895		FALSE	0	USP9X	381886	0.13671171
892	3.41910137	0.00156937	0.29247451	0.07666667	25	7	FALSE	CASP3	64.24	25	0	0	0.78008169		FALSE	0	CASP3	3054380	0.05411168
894	3.57226649	3.22E-04	0.27993432	0.14545455	11	7	FALSE	CASP7	85.90909091	11	0	0	0.76615759		FALSE	0	CASP7	720104	0.11052384
896	3.61952191	1.12E-04	0.27627958	0.19444444	9	7	FALSE	CASP9	91	9	0	0	0.76186164		FALSE	0	CASP9	242426	0.13716591
898	3.00154936	0.0038403	0.33316127	0.01329787	48	7	FALSE	BRE	36.27083333	48	0	0	0.81804097	mRNAup	FALSE	0	BRE	5096232	0.02936933
899	3.61974325	1.93E-04	0.27626269	0	8	7	FALSE	OPTN	72.875	8	0	0	0.76184152		FALSE	0	OPTN	300668	0.13285582
901	3.57326251	1.42E-04	0.27985629	0.13333333	6	8	FALSE	RPN2	184.5	6	0	0	0.76606704		FALSE	0	RPN2	429584	0.19047619
903	3.68614431	0	0.27128618	1	2	8	FALSE	DHRS7B	352	2	0	0	0.75580506		FALSE	0	DHRS7B	0	0.50940666
905	2.99568393	0.00727696	0.33381359	0.03966155	62	7	FALSE	EGFR	69.75806452	62	0	0	0.81857419		FALSE	0	EGFR	13048516	0.02738185
907	3.32027446	8.21E-04	0.30117992	0.05454545	11	8	FALSE	LRPPRC	206.7272727	11	0	0	0.78906596		FALSE	0	LRPPRC	2344120	0.1127412
910	3.58056662	2.39E-05	0.27928541	0.33333333	3	8	FALSE	SLC25A13	332.6666667	3	0	0	0.76540303		FALSE	0	SLC25A13	173452	0.36480059
912	4.00143869	0	0.24991011	0	1	8	FALSE	ATG2A	48	1	0	0	0.72714194		FALSE	0	ATG2A	0	0
914	4.00143869	0	0.24991011	0	1	8	FALSE	FAM175A	48	1	0	0	0.72714194		FALSE	0	FAM175A	0	0
916	3.53131917	3.03E-04	0.28318029	0.08333333	9	7	FALSE	UBE2D1	131.1111111	9	0	0	0.76988008		FALSE	0	UBE2D1	935690	0.13545633
918	3.53596724	1.56E-04	0.28280805	0.13333333	10	7	FALSE	FAS	95.8	10	0	0	0.76945752		FALSE	0	FAS	337480	0.12565789
920	3.9873838	2.26E-04	0.25079101	0	3	8	FALSE	CHI3L1	17.33333333	3	0	0	0.72841965	mRNAup	FALSE	0	CHI3L1	166748	0.33333333
922	3.77301903	3.92E-05	0.26503974	0	6	7	FALSE	BARD1	55.66666667	6	0	0	0.74790736		FALSE	0	BARD1	124320	0.18041804
925	3.39962373	9.72E-04	0.2941502	0.08333333	9	7	FALSE	TFG	173.6666667	9	0	0	0.78185239		FALSE	0	TFG	1903684	0.12487992
927	4.00143869	0	0.24991011	0	1	8	FALSE	SSR3	48	1	0	0	0.72714194		FALSE	0	SSR3	0	0
929	4.00143869	0	0.24991011	0	1	8	FALSE	TMX3	48	1	0	0	0.72714194		FALSE	0	TMX3	0	0
931	3.31706507	7.13E-04	0.30147132	0.03636364	11	7	FALSE	HNRNPA2B1	183.2727273	11	0	0	0.78935772		FALSE	0	HNRNPA2B1	1714006	0.11350924
933	3.95219124	0	0.25302419	1	2	7	FALSE	BABAM1	41.5	2	0	0	0.73161898		FALSE	0	BABAM1	0	0.52531646
936	3.26416556	9.60E-04	0.30635701	0.03921569	18	7	FALSE	UBB	138.6111111	18	0	0	0.79416677		FALSE	0	UBB	3034486	0.0774043
938	2.98649845	0.00649543	0.33484029	0.0255102	49	7	FALSE	TP53	99.95918367	49	0	0	0.81940923		FALSE	0	TP53	17373184	0.03259294
940	4.00143869	0	0.24991011	0	1	8	FALSE	UGGT2	48	1	0	0	0.72714194		FALSE	0	UGGT2	0	0
942	3.19400177	0.0044404	0.31308686	0.01851852	28	7	FALSE	BRCA1	103.2142857	28	0	0	0.80054529		FALSE	0	BRCA1	10119752	0.04880952
945	3.90227977	3.83E-06	0.25626046	0	2	8	FALSE	RAD51	96	2	0	0	0.73615638		FALSE	0	RAD51	10050	0.51912568
948	3.51405489	1.37E-04	0.28457154	0.19047619	7	7	FALSE	MMS19	195.8571429	7	0	0	0.77144956		FALSE	0	MMS19	283598	0.16176297
950	3.48727313	7.56E-04	0.28675701	0.01052632	20	7	FALSE	CUL1	73.2	20	0	0	0.77388426		FALSE	0	CUL1	1842528	0.06373239
952	3.58056662	2.39E-05	0.27928541	0.33333333	3	8	FALSE	FKBP8	332.6666667	3	0	0	0.76540303		FALSE	0	FKBP8	173452	0.36480059
954	4.00143869	0	0.24991011	0	1	8	FALSE	C19orf62	48	1	0	0	0.72714194		FALSE	0	C19orf62	0	0
956	3.89077025	4.17E-05	0.25701852	0.1	5	7	FALSE	FAM175B	40	5	0	0	0.7372027		FALSE	0	FAM175B	50744	0.22134831
958	3.95219124	0	0.25302419	1	2	7	FALSE	BRCC3	41.5	2	0	0	0.73161898		FALSE	0	BRCC3	0	0.52531646
960	3.59650288	5.77E-04	0.27804788	0.02197802	14	8	FALSE	SHMT2	69.28571429	14	0	0	0.76395428		FALSE	0	SHMT2	1451666	0.08068316
962	3.7980301	9.08E-06	0.26329439	0	2	8	FALSE	TTC28	193	2	0	0	0.74563363		FALSE	0	TTC28	16940	0.50659631
964	3.87405932	4.43E-04	0.25812718	0.16666667	4	8	FALSE	BTLA	43.5	4	0	0	0.73872188	mRNAup	FALSE	0	BTLA	299442	0.28104575
965	3.49756529	0.00145657	0.28591318	0.07308378	34	7	FALSE	PTPN11	38.02941176	34	0	0	0.77294861		FALSE	0	PTPN11	1558770	0.04631632
967	2.91168659	0.01415916	0.34344356	0.03110124	138	7	FALSE	PTPN6	24.10869565	138	0	0	0.82621031	mRNAup	FALSE	0	PTPN6	15235414	0.01512929
969	3.08565737	0.00601826	0.32408005	0.00324594	90	7	FALSE	BUB1B	12.58888889	90	0	0	0.81039478	mRNAup	FALSE	0	BUB1B	11083246	0.01894265
970	3.80765826	2.04E-05	0.26262861	0.33333333	3	8	FALSE	HSPH1	148	3	0	0	0.74475834		FALSE	0	HSPH1	52422	0.34745098
972	3.89508632	7.26E-06	0.25673372	0	2	8	FALSE	ZW10	117	2	0	0	0.73681033		FALSE	0	ZW10	20900	0.51101322
974	3.95208057	3.81E-06	0.25303128	0	2	8	FALSE	CCNA2	82.5	2	0	0	0.73162904		FALSE	0	CCNA2	13310	0.51910828
976	3.11775122	0.00240961	0.320744	0.03977273	33	8	FALSE	CASC5	26.33333333	33	0	0	0.80747716	mRNAup	FALSE	0	CASC5	3529492	0.04114629
978	3.97200089	1.00E-05	0.25176228	0.33333333	4	8	FALSE	NUF2	55.5	4	0	0	0.7298181		FALSE	0	NUF2	29752	0.29078947
981	3.85945108	6.90E-05	0.2591042	0.2	5	7	FALSE	NDC80	55	5	0	0	0.7400499		FALSE	0	NDC80	63756	0.23135593
983	3.55588756	2.45E-04	0.28122374	0.04444444	10	7	FALSE	TRIP13	115.3	10	0	0	0.76764659		FALSE	0	TRIP13	404870	0.11103582
985	4.03519256	6.09E-06	0.24781965	0	2	7	FALSE	PSMB5	57	2	0	0	0.7240734		FALSE	0	PSMB5	9034	0.5045045
987	3.94366977	4.22E-06	0.25357093	0	2	8	FALSE	BRCA2	69	2	0	0	0.73239366		FALSE	0	BRCA2	8626	0.50746269
989	3.94687915	6.39E-06	0.25336474	0	2	8	FALSE	CENPE	115	2	0	0	0.7321019		FALSE	0	CENPE	19978	0.51818182
991	3.93282426	4.07E-05	0.2542702	0	4	8	FALSE	CDC27	45	4	0	0	0.73337961		FALSE	0	CDC27	140228	0.27848101
993	3.52744577	1.23E-04	0.28349125	0.1	5	8	FALSE	PSMD6	253.4	5	0	0	0.7702322		FALSE	0	PSMD6	324376	0.22551293
995	3.68813634	1.18E-04	0.27113965	0.1	5	7	FALSE	MAP3K4	83.2	5	0	0	0.75562397		FALSE	0	MAP3K4	104508	0.20806045
997	3.91832669	7.64E-06	0.25521098	0	3	8	FALSE	CCT2	73.33333333	3	0	0	0.73469757		FALSE	0	CCT2	23968	0.34444444
999	3.66389996	3.28E-04	0.27293322	0	10	7	FALSE	PSMA3	45.3	10	0	0	0.75782728		FALSE	0	PSMA3	327310	0.10472813
1001	4.0855467	0	0.24476528	0	1	8	FALSE	MAD2L1BP	90	1	0	0	0.71949575		FALSE	0	MAD2L1BP	0	0
1003	3.70905268	6.11E-05	0.26961062	0	4	7	FALSE	UGP2	105	4	0	0	0.75372248		FALSE	0	UGP2	101252	0.25615764
1006	4.05267818	1.68E-06	0.24675041	0.66666667	3	8	FALSE	DSN1	51.66666667	3	0	0	0.7224838		FALSE	0	DSN1	4570	0.39141414
1008	3.55478088	2.23E-04	0.28131129	0	5	8	FALSE	PSMA4	205	5	0	0	0.76774719		FALSE	0	PSMA4	360482	0.21473684
1010	3.71724214	3.72E-04	0.26901664	0	7	7	FALSE	SKIV2L2	133.7142857	7	0	0	0.75297799		FALSE	0	SKIV2L2	534266	0.17837942
1012	3.21104471	9.15E-04	0.31142512	0.04166667	16	7	FALSE	TUBB	162.5	16	0	0	0.79899594		FALSE	0	TUBB	3175246	0.08719053
1014	3.54448871	1.18E-04	0.28212814	0.1	5	8	FALSE	PSMA6	244	5	0	0	0.76868284		FALSE	0	PSMA6	282730	0.22391904
1016	3.79006197	8.40E-06	0.26384793	0	2	7	FALSE	RPL39	149	2	0	0	0.746358		FALSE	0	RPL39	30144	0.50511945
1018	3.93326693	6.52E-06	0.25424158	0	3	8	FALSE	ANAPC4	59	3	0	0	0.73333937		FALSE	0	ANAPC4	18540	0.36942675
1020	3.83410801	1.52E-05	0.26081686	0.33333333	4	8	FALSE	TP73	75.5	4	0	0	0.74235382		FALSE	0	TP73	35420	0.27068345
1022	3.7622842	6.05E-05	0.26579598	0	6	7	FALSE	BAG2	90.5	6	0	0	0.74888325		FALSE	0	BAG2	198610	0.19164882
1024	3.70119522	2.69E-04	0.27018299	0.02222222	10	8	FALSE	APC	62.7	10	0	0	0.7544368		FALSE	0	APC	499780	0.1084063
1026	3.08842408	0.0028826	0.32378973	0.01724138	29	7	FALSE	MDM2	123.2758621	29	0	0	0.81014327		FALSE	0	MDM2	7483320	0.04861481
1028	4.0855467	0	0.24476528	0	1	8	FALSE	MXI1	90	1	0	0	0.71949575		FALSE	0	MXI1	0	0
1030	3.92994688	7.27E-05	0.25445637	0	3	8	FALSE	PNMA2	84.66666667	3	0	0	0.73364119		FALSE	0	PNMA2	71392	0.33601071
1032	3.57381585	5.30E-05	0.27981296	0.1	5	8	FALSE	MAD2L1	190	5	0	0	0.76601674		FALSE	0	MAD2L1	195948	0.21473923
1034	3.97465693	9.97E-06	0.25159404	0.33333333	4	7	FALSE	NSL1	49.25	4	0	0	0.72957664		FALSE	0	NSL1	28428	0.29518072
1036	3.83233732	1.60E-04	0.26093736	0	6	8	FALSE	ZFC3H1	73.33333333	6	0	0	0.74251479		FALSE	0	ZFC3H1	299906	0.17263325
1038	3.56131031	1.32E-04	0.28079553	0	6	7	FALSE	UBR5	143	6	0	0	0.76715361		FALSE	0	UBR5	395762	0.17997465
1040	3.52290837	7.40E-04	0.28385638	0.04545455	12	8	FALSE	HSPB1	91.08333333	12	0	0	0.77064469		FALSE	0	HSPB1	1493140	0.09496327
1042	3.42264276	3.52E-04	0.29217189	0.05555556	9	8	FALSE	EEF2	195.1111111	9	0	0	0.77975975		FALSE	0	EEF2	1307022	0.13492063
1044	4.05267818	1.68E-06	0.24675041	0.66666667	3	8	FALSE	PMF1	51.66666667	3	0	0	0.7224838		FALSE	0	PMF1	4570	0.39141414
1046	4.05256751	2.17E-06	0.24675715	0	2	8	FALSE	ANAPC1	67.5	2	0	0	0.72249386		FALSE	0	ANAPC1	7320	0.54065041
1048	4.01339088	4.02E-06	0.24916586	0	2	8	FALSE	ANAPC2	60	2	0	0	0.72605537		FALSE	0	ANAPC2	6704	0.50862069
1050	3.82027446	6.07E-05	0.2617613	0	4	8	FALSE	AP1B1	123.5	4	0	0	0.74361141		FALSE	0	AP1B1	203830	0.25627615
1052	4.0855467	0	0.24476528	0	1	8	FALSE	COMMD4	90	1	0	0	0.71949575		FALSE	0	COMMD4	0	0
1054	4.23240372	2.25E-04	0.23627236	0	3	8	FALSE	C10orf55	14.66666667	3	0	0	0.70614512	mRNAup	FALSE	0	C10orf55	590758	0.33333333
1055	5.23229305	0	0.19112079	0	1	9	FALSE	SHPK	3	1	0	0	0.61524609		FALSE	0	SHPK	0	0
1057	3.92651616	2.04E-05	0.25467869	0	2	8	FALSE	ERCC4	73.5	2	0	0	0.73395308		FALSE	0	ERCC4	58232	0.5
1059	4.42208942	1.08E-06	0.22613744	0	2	8	FALSE	C15orf48	13.5	2	0	0	0.68890096	mRNAup	FALSE	0	C15orf48	644	0.5
1060	3.53585657	0.00130533	0.2828169	0.004329	22	8	FALSE	TSSK3	13.13636364	22	0	0	0.76946758	mRNAdown	FALSE	0	TSSK3	1053130	0.05822511
1062	3.0999336	5.50E-04	0.32258755	0.03571429	8	6	FALSE	C1orf112	116.5	8	0	0	0.80909695	mRNAup	FALSE	0	C1orf112	596916	0.13617647
1065	3.85823373	7.87E-04	0.25918596	0	13	8	FALSE	C1orf186	4.30769231	13	0	0	0.74016057	mRNAup	FALSE	0	C1orf186	386680	0.08481262
1066	4.85812306	0	0.20584081	0	1	9	FALSE	WDR47	13	1	0	0	0.64926154		FALSE	0	WDR47	0	0
1068	3.94300575	2.99E-05	0.25361363	0	3	7	FALSE	SBF1	61.66666667	3	0	0	0.73245402		FALSE	0	SBF1	33788	0.35477583
1070	4.85812306	0	0.20584081	0	1	9	FALSE	TMTC4	13	1	0	0	0.64926154		FALSE	0	TMTC4	0	0
1072	3.52047366	6.79E-04	0.28405269	0	11	7	FALSE	DYNLL1	105.1818182	11	0	0	0.77086603		FALSE	0	DYNLL1	1196874	0.09718453
1074	3.14807437	0.00135987	0.3176545	0	14	8	FALSE	FIGNL1	49.64285714	14	0	0	0.80472051	mRNAdown	FALSE	0	FIGNL1	1485162	0.09390513
1076	4.10768039	9.51E-06	0.2434464	0	3	8	FALSE	SNX17	11.66666667	3	0	0	0.7174836		FALSE	0	SNX17	11574	0.33333333
1078	3.79991147	9.46E-05	0.26316403	0	5	8	FALSE	PLD1	62.2	5	0	0	0.74546259		FALSE	0	PLD1	83292	0.20606061
1080	3.78242585	1.62E-04	0.2643806	0	5	8	FALSE	PKN1	74	5	0	0	0.7470522		FALSE	0	PKN1	130494	0.20621469
1082	3.88125277	6.11E-05	0.25764877	0	3	7	FALSE	JPH1	83.66666667	3	0	0	0.73806793		FALSE	0	JPH1	52678	0.33879781
1084	3.96480744	2.74E-04	0.25221906	0	4	8	FALSE	DIP2A	36.75	4	0	0	0.73047205		FALSE	0	DIP2A	559302	0.2535461
1086	4.06795042	3.37E-05	0.24582404	0	3	7	FALSE	SENP5	52.66666667	3	0	0	0.72109542		FALSE	0	SENP5	29542	0.34444444
1088	4.54614874	2.95E-06	0.21996641	0	2	9	FALSE	PLXDC2	15.5	2	0	0	0.67762284		FALSE	0	PLXDC2	2470	0.5
1090	4.85812306	0	0.20584081	0	1	9	FALSE	ZBTB9	13	1	0	0	0.64926154		FALSE	0	ZBTB9	0	0
1092	4.18105356	0	0.23917417	0	1	8	FALSE	C1orf53	56	1	0	0	0.71081331	mRNAdown	FALSE	0	C1orf53	0	0
1094	3.07613988	0.00430581	0.32508275	0.02657807	43	7	FALSE	C3	24.23255814	43	0	0	0.81126001	mRNAup	FALSE	0	C3	3253556	0.03042289
1095	3.00542275	0.00952821	0.33273189	0.0031122	111	6	FALSE	TGM2	15.24324324	111	0	0	0.81768884	mRNAup	FALSE	0	TGM2	19176064	0.01809724
1097	4.07602922	0	0.24533681	0	1	8	FALSE	CR2	43	1	0	0	0.72036098		FALSE	0	CR2	0	0
1099	3.77501107	0.0010642	0.26489989	0.02105263	20	7	FALSE	PITX3	25	20	0	0	0.74772627		FALSE	0	PITX3	2195442	0.06072319
1102	3.96403276	1.85E-05	0.25226835	0.16666667	4	8	FALSE	CTSL	38.25	4	0	0	0.73054248		FALSE	0	CTSL	18268	0.26584507
1104	3.81440903	2.20E-04	0.26216381	0	9	7	FALSE	LRP1	43.88888889	9	0	0	0.74414463		FALSE	0	LRP1	303384	0.1265159
1106	4.07602922	0	0.24533681	0	1	8	FALSE	CFHR3	43	1	0	0	0.72036098		FALSE	0	CFHR3	0	0
1108	3.74181054	5.28E-05	0.2672503	0.13333333	6	8	FALSE	CFP	25.5	6	0	0	0.7507445	mRNAup	FALSE	0	CFP	57518	0.18248175
1110	4.07602922	0	0.24533681	0	1	8	FALSE	IGM	43	1	0	0	0.72036098		FALSE	0	IGM	0	0
1112	4.05666224	4.81E-06	0.24650808	0.16666667	4	8	FALSE	CR1	17.75	4	0	0	0.72212161		FALSE	0	CR1	18440	0.30803571
1114	3.88014608	0	0.25772226	0	1	7	FALSE	C3orf36	120	1	0	0	0.73816854	mRNAup	FALSE	0	C3orf36	0	0
1116	4.00121735	2.43E-04	0.24992394	0	4	8	FALSE	C3orf52	22.5	4	0	0	0.72716206	mRNAup	FALSE	0	C3orf52	738892	0.25
1117	4.06463037	9.45E-05	0.24602483	0	5	9	FALSE	SYNE4	14.4	5	0	0	0.72139724		FALSE	0	SYNE4	272754	0.20615385
1119	3.1833776	0.00112736	0.31413176	0	13	8	FALSE	C9orf9	40.46153846	13	0	0	0.80151113	mRNAdown	FALSE	0	C9orf9	818484	0.08204062
1120	4.18326693	0	0.23904762	0	1	9	FALSE	NXN	13	1	0	0	0.7106121		FALSE	0	NXN	0	0
1122	3.85148296	9.31E-05	0.25964025	0	10	8	FALSE	KRTAP10-7	28.3	10	0	0	0.74077428		FALSE	0	KRTAP10-7	162314	0.13252427
1124	3.73472776	5.89E-04	0.26775713	0	13	7	FALSE	KRTAP10-3	33.46153846	13	0	0	0.75138839		FALSE	0	KRTAP10-3	958712	0.09464005
1126	3.78142984	9.80E-05	0.26445023	0.02222222	10	7	FALSE	KRTAP10-9	37.4	10	0	0	0.74714274		FALSE	0	KRTAP10-9	150546	0.13309091
1128	3.7998008	5.12E-05	0.26317169	0.1	5	7	FALSE	DDX24	148	5	0	0	0.74547265		FALSE	0	DDX24	71692	0.25996473
1131	3.92961487	1.67E-05	0.25447786	0	4	8	FALSE	KRTAP10-5	47.25	4	0	0	0.73367138		FALSE	0	KRTAP10-5	22428	0.29458599
1133	4.18326693	0	0.23904762	0	1	9	FALSE	MINA	13	1	0	0	0.7106121		FALSE	0	MINA	0	0
1135	4.02799911	1.60E-05	0.24826222	0	3	9	FALSE	SEPHS1	47	3	0	0	0.72472735		FALSE	0	SEPHS1	15454	0.33823529
1137	3.94057105	5.19E-04	0.25377033	0	9	8	FALSE	MUCL1	6.88888889	9	0	0	0.73267536	mRNAup	FALSE	0	MUCL1	239838	0.11111111
1139	4.02589641	3.01E-06	0.24839189	0	4	8	FALSE	KRTAP10-8	24.25	4	0	0	0.72491851		FALSE	0	KRTAP10-8	6474	0.40086207
1141	3.1710934	0.00102975	0.31534864	0	21	8	FALSE	CAPG	30.0952381	21	0	0	0.80262787	mRNAup	FALSE	0	CAPG	1501126	0.05999018
1143	3.62350598	3.04E-04	0.27597581	0.04761905	7	7	FALSE	TKT	132.1428571	7	0	0	0.76149946		FALSE	0	TKT	750482	0.15264642
1145	4.03142984	3.71E-06	0.24805095	0	4	7	FALSE	ADK	22.75	4	0	0	0.72441547		FALSE	0	ADK	7500	0.27884615
1147	3.63457282	2.37E-04	0.2751355	0.03571429	8	7	FALSE	PRDX6	79.125	8	0	0	0.76049338		FALSE	0	PRDX6	610768	0.14354396
1150	3.70506861	3.65E-04	0.26990053	0	6	7	FALSE	SNX3	94.16666667	6	0	0	0.75408467		FALSE	0	SNX3	456772	0.17253086
1152	4.08023462	4.50E-07	0.24508395	0	2	7	FALSE	UFM1	20.5	2	0	0	0.71997867		FALSE	0	UFM1	1282	0.51315789
1154	3.77357238	7.78E-05	0.26500088	0	6	7	FALSE	SIAH1	39.66666667	6	0	0	0.74785706		FALSE	0	SIAH1	115878	0.16959064
1156	3.84340416	8.11E-06	0.26018601	0	2	8	FALSE	ETFB	157.5	2	0	0	0.74150871		FALSE	0	ETFB	11554	0.50160256
1158	4.17098274	0	0.23975165	0	1	9	FALSE	UFC1	21	1	0	0	0.71172884		FALSE	0	UFC1	0	0
1160	3.98306773	1.08E-05	0.25106277	0	4	7	FALSE	PIR	34.5	4	0	0	0.72881202		FALSE	0	PIR	25186	0.25968992
1162	4.17098274	0	0.23975165	0	1	9	FALSE	CRIP1	21	1	0	0	0.71172884		FALSE	0	CRIP1	0	0
1164	3.93570164	1.08E-05	0.2540843	0	3	8	FALSE	FUBP1	49.33333333	3	0	0	0.73311803		FALSE	0	FUBP1	11882	0.3427896
1166	3.87970341	2.19E-05	0.25775166	0	3	8	FALSE	DAZAP1	111.3333333	3	0	0	0.73820878		FALSE	0	DAZAP1	32074	0.33535968
1169	3.4607127	7.33E-04	0.28895782	0.01515152	12	7	FALSE	PML	143.5	12	0	0	0.77629885		FALSE	0	PML	2057602	0.10630899
1174	4.11764055	0	0.24285753	0	1	9	FALSE	K7EJH0	33	1	0	0	0.71657813		FALSE	0	K7EJH0	0	0
1176	4.07536521	2.00E-06	0.24537678	0	2	9	FALSE	TCTE1	36.5	2	0	0	0.72042134		FALSE	0	TCTE1	3704	0.51449275
1180	4.11764055	0	0.24285753	0	1	9	FALSE	CD97	33	1	0	0	0.71657813		FALSE	0	CD97	0	0
1183	3.97133687	2.66E-05	0.25180438	0	4	7	FALSE	COL4A5	31	4	0	0	0.72987847		FALSE	0	COL4A5	26078	0.27777778
1186	3.96945551	9.49E-06	0.25192372	0.1	5	8	FALSE	CASP5	7.6	5	0	0	0.7300495	mRNAup	FALSE	0	CASP5	11790	0.21875
1187	3.64099159	1.19E-04	0.27465046	0	8	7	FALSE	MAX	71.5	8	0	0	0.75990986		FALSE	0	MAX	210126	0.14358452
1189	3.81119965	1.91E-04	0.26238458	0.01818182	11	8	FALSE	MEFV	9.90909091	11	0	0	0.7444364	mRNAup	FALSE	0	MEFV	381770	0.11223345
1191	2.90670651	0.02046224	0.34403198	0.00879121	196	6	FALSE	CASP8	14.68367347	196	0	0	0.82666304	mRNAup	FALSE	0	CASP8	35819654	0.01060657
1192	3.35048694	0.00229178	0.29846408	0.07474747	45	7	FALSE	PIK3R1	56.48888889	45	0	0	0.78631937		FALSE	0	PIK3R1	5143802	0.03811676
1194	3.90659584	0	0.25597734	0	1	7	FALSE	CDC2L2	196	1	0	0	0.73576401		FALSE	0	CDC2L2	0	0
1196	3.58001328	1.23E-04	0.27932857	0.1	5	7	FALSE	PRKCI	182	5	0	0	0.76545334		FALSE	0	PRKCI	361004	0.20731429
1198	3.55666224	1.01E-04	0.28116249	0.13333333	6	7	FALSE	SNRPD3	161.6666667	6	0	0	0.76757616		FALSE	0	SNRPD3	350304	0.19394304
1200	3.71314741	1.03E-04	0.2693133	0.29090909	11	7	FALSE	RIPK1	83.45454545	11	0	0	0.75335024		FALSE	0	RIPK1	226340	0.12785834
1202	3.19842851	0.00167248	0.31265354	0.03	25	7	FALSE	MAPK3	100.76	25	0	0	0.80014286		FALSE	0	MAPK3	4469788	0.05461287
1204	3.75697211	4.27E-05	0.26617179	0.16666667	4	7	FALSE	RALBP1	100.25	4	0	0	0.74936617		FALSE	0	RALBP1	39820	0.26671123
1206	3.85148296	1.01E-05	0.25964025	0.33333333	3	7	FALSE	RNF34	106	3	0	0	0.74077428		FALSE	0	RNF34	34580	0.39281289
1208	3.89475432	7.02E-06	0.2567556	0	2	7	FALSE	SCGB2A2	107	2	0	0	0.73684052		FALSE	0	SCGB2A2	8848	0.50717703
1210	3.60934042	1.61E-04	0.27705893	0.07142857	8	7	FALSE	UBE2V1	127.5	8	0	0	0.76278723		FALSE	0	UBE2V1	510214	0.14481186
1212	3.82304117	6.16E-05	0.26157186	0	3	7	FALSE	SORBS1	95.66666667	3	0	0	0.74335989		FALSE	0	SORBS1	66560	0.33930705
1214	3.81197432	9.64E-06	0.26233125	0	2	7	FALSE	BCL2L10	160.5	2	0	0	0.74436597		FALSE	0	BCL2L10	32728	0.51785714
1216	3.90659584	0	0.25597734	0	1	7	FALSE	PRDM14	196	1	0	0	0.73576401		FALSE	0	PRDM14	0	0
1218	3.6938911	3.09E-04	0.27071724	0.21212121	12	7	FALSE	BIRC2	79.58333333	12	0	0	0.75510081		FALSE	0	BIRC2	861946	0.11232909
1220	3.74037185	9.24E-05	0.2673531	0.13333333	6	7	FALSE	TRADD	88.16666667	6	0	0	0.75087529		FALSE	0	TRADD	126678	0.1845614
1222	3.80754759	4.63E-05	0.26263624	0	4	7	FALSE	CARD11	74.5	4	0	0	0.7447684		FALSE	0	CARD11	40956	0.26727273
1224	3.45495795	4.22E-04	0.28943912	0.06666667	10	7	FALSE	RB1	165.6	10	0	0	0.776822		FALSE	0	RB1	1441864	0.13333333
1226	3.90659584	0	0.25597734	0	1	7	FALSE	CDK11B	196	1	0	0	0.73576401		FALSE	0	CDK11B	0	0
1229	3.8916556	6.26E-06	0.25696005	0	2	7	FALSE	CLIP3	103	2	0	0	0.73712222		FALSE	0	CLIP3	13856	0.5049505
1231	3.90659584	0	0.25597734	0	1	7	FALSE	QDPR	196	1	0	0	0.73576401		FALSE	0	QDPR	0	0
1233	3.46956618	2.04E-04	0.28822047	0	6	7	FALSE	PIAS1	212	6	0	0	0.77549398		FALSE	0	PIAS1	735780	0.18476357
1235	3.80920761	5.22E-05	0.26252179	0	3	7	FALSE	CASC3	129	3	0	0	0.74461749		FALSE	0	CASC3	76326	0.33773087
1237	3.90659584	0	0.25597734	0	1	7	FALSE	EPSTI1	196	1	0	0	0.73576401		FALSE	0	EPSTI1	0	0
1239	3.87704737	4.83E-04	0.25792824	0.33333333	3	7	FALSE	MAVS	95	3	0	0	0.73845024		FALSE	0	MAVS	1397274	0.36835279
1241	3.50675077	0.00108872	0.28516426	0.06315789	20	7	FALSE	TRAF2	70.7	20	0	0	0.77211357		FALSE	0	TRAF2	2549596	0.0669532
1243	3.82990261	4.19E-05	0.26110325	0	3	7	FALSE	ST14	80	3	0	0	0.74273613		FALSE	0	ST14	24192	0.33333333
1245	3.90659584	0	0.25597734	0	1	7	FALSE	SMPD1	196	1	0	0	0.73576401		FALSE	0	SMPD1	0	0
1247	3.66135458	1.42E-04	0.27312296	0	4	7	FALSE	BCAP31	140.75	4	0	0	0.75805867		FALSE	0	BCAP31	214948	0.25317029
1249	3.7065073	1.00E-04	0.26979577	0	4	7	FALSE	ERRFI1	145.25	4	0	0	0.75395388		FALSE	0	ERRFI1	156254	0.26037906
1252	3.90659584	0	0.25597734	0	1	7	FALSE	IL13RA2	196	1	0	0	0.73576401		FALSE	0	IL13RA2	0	0
1254	3.73649845	2.12E-04	0.26763025	0.04761905	7	7	FALSE	PSEN1	83.71428571	7	0	0	0.75122741		FALSE	0	PSEN1	345742	0.15689981
1256	3.86177512	6.52E-06	0.25894827	0	2	7	FALSE	PSEN2	129	2	0	0	0.73983863		FALSE	0	PSEN2	19290	0.512
1258	3.86077911	3.93E-05	0.25901508	0	3	7	FALSE	KLK5	91.66666667	3	0	0	0.73992917		FALSE	0	KLK5	42354	0.33705081
1260	3.59860558	1.31E-04	0.27788541	0.2	6	7	FALSE	TBK1	119.1666667	6	0	0	0.76376313		FALSE	0	TBK1	187558	0.19232847
1262	3.90659584	0	0.25597734	0	1	7	FALSE	PLIN4	196	1	0	0	0.73576401		FALSE	0	PLIN4	0	0
1264	3.68083223	8.33E-05	0.27167769	0	5	7	FALSE	BLM	102	5	0	0	0.75628798		FALSE	0	BLM	178068	0.21535181
1266	3.90659584	0	0.25597734	0	1	7	FALSE	KLK9	196	1	0	0	0.73576401		FALSE	0	KLK9	0	0
1268	3.67507747	7.33E-05	0.27210311	0	7	7	FALSE	SOX2	67.85714286	7	0	0	0.75681114		FALSE	0	SOX2	153740	0.15404872
1271	3.86166445	4.20E-05	0.25895569	0	3	7	FALSE	USP2	106.3333333	3	0	0	0.73984869		FALSE	0	USP2	66924	0.34310532
1273	3.81341301	9.30E-05	0.26223228	0.1	5	7	FALSE	SPARC	76	5	0	0	0.74423518		FALSE	0	SPARC	237658	0.21239437
1275	3.44112439	1.44E-04	0.29060269	0	5	7	FALSE	PDIA6	275.8	5	0	0	0.7780796		FALSE	0	PDIA6	624102	0.22842893
1277	3.90659584	0	0.25597734	0	1	7	FALSE	ANGPTL4	196	1	0	0	0.73576401		FALSE	0	ANGPTL4	0	0
1279	3.58222665	3.87E-04	0.27915598	0.08333333	9	7	FALSE	HDAC7	114.2222222	9	0	0	0.76525212		FALSE	0	HDAC7	566698	0.12475634
1282	3.4831784	7.68E-04	0.28709411	0	14	7	FALSE	PARK2	90.85714286	14	0	0	0.77425651		FALSE	0	PARK2	1328332	0.08429376
1285	3.70307658	6.71E-05	0.27004572	0	4	7	FALSE	PARK7	140	4	0	0	0.75426577		FALSE	0	PARK7	169178	0.26577438
1287	3.88634351	2.69E-06	0.25731127	0	2	7	FALSE	BIRC6	119.5	2	0	0	0.73760514		FALSE	0	BIRC6	8652	0.51521739
1289	3.78065516	2.83E-05	0.26450442	0.33333333	3	7	FALSE	UBE2L3	167	3	0	0	0.74721317		FALSE	0	UBE2L3	93062	0.36231884
1291	3.76693227	5.97E-05	0.26546801	0.3	5	7	FALSE	CFLAR	99.8	5	0	0	0.7484607		FALSE	0	CFLAR	87162	0.22798165
1294	3.77113767	8.82E-06	0.26517197	0	2	7	FALSE	HIP1	212.5	2	0	0	0.74807839		FALSE	0	HIP1	41832	0.52351485
1298	3.74922532	3.72E-05	0.26672177	0	3	7	FALSE	BAP1	174.3333333	3	0	0	0.75007043		FALSE	0	BAP1	138016	0.35738832
1301	3.36874723	9.68E-04	0.29684625	0.03684211	20	7	FALSE	CTNNB1	88.35	20	0	0	0.78465934		FALSE	0	CTNNB1	2185102	0.06545048
1303	3.7773351	1.25E-05	0.2647369	0.33333333	3	7	FALSE	EDA2R	134	3	0	0	0.74751499		FALSE	0	EDA2R	40384	0.37758945
1305	3.87018592	7.62E-06	0.25838552	0.16666667	4	7	FALSE	DDX58	84.25	4	0	0	0.73907401		FALSE	0	DDX58	20236	0.29283217
1307	3.89475432	7.02E-06	0.2567556	0	2	7	FALSE	GREB1	107	2	0	0	0.73684052		FALSE	0	GREB1	8848	0.50717703
1309	3.88435148	1.74E-05	0.25744323	0	2	7	FALSE	GMNN	117.5	2	0	0	0.73778623		FALSE	0	GMNN	43254	0.504329
1311	3.73229305	3.85E-05	0.2679318	0	3	7	FALSE	RALGDS	193.3333333	3	0	0	0.75160972		FALSE	0	RALGDS	115264	0.34284017
1313	3.78607791	6.68E-05	0.26412557	0	4	7	FALSE	CRYAB	70.75	4	0	0	0.74672019		FALSE	0	CRYAB	116290	0.25738007
1315	3.02467906	0.00559686	0.33061359	0.00383653	110	7	FALSE	RIPK3	15.82727273	110	0	0	0.81593827	mRNAup	FALSE	0	RIPK3	14323326	0.01807216
1317	3.01848163	0.00637689	0.33129239	0.01836796	82	7	FALSE	TNFAIP3	20.64634146	82	0	0	0.81650167	mRNAup	FALSE	0	TNFAIP3	10118800	0.02112622
1319	3.82768924	5.20E-04	0.26125423	0	5	7	FALSE	PARP2	89.2	5	0	0	0.74293734		FALSE	0	PARP2	1007218	0.225
1325	3.69245241	3.05E-05	0.27082272	0	3	7	FALSE	WHSC1L1	145	3	0	0	0.7552316		FALSE	0	WHSC1L1	83780	0.34042553
1327	3.71381142	2.52E-05	0.26926515	0.2	5	7	FALSE	TICAM1	119.4	5	0	0	0.75328987		FALSE	0	TICAM1	83116	0.22666667
1329	3.55301018	2.45E-04	0.28145149	0	4	7	FALSE	USO1	247.25	4	0	0	0.76790817		FALSE	0	USO1	441966	0.25839454
1331	3.6002656	1.04E-04	0.27775729	0.04761905	7	7	FALSE	PRKCZ	94	7	0	0	0.76361222		FALSE	0	PRKCZ	212456	0.15946276
1333	3.44034971	0.00137002	0.29066812	0.03676471	17	7	FALSE	TRAF1	81.29411765	17	0	0	0.77815003		FALSE	0	TRAF1	2789702	0.07374488
1335	3.86177512	6.52E-06	0.25894827	0	2	7	FALSE	UMPS	129	2	0	0	0.73983863		FALSE	0	UMPS	19290	0.512
1337	3.64187694	5.32E-04	0.27458369	0.02222222	10	7	FALSE	COPS6	91.4	10	0	0	0.75982937		FALSE	0	COPS6	734712	0.11089351
1339	3.8394201	5.81E-05	0.260456	0	4	7	FALSE	SERPINB5	89	4	0	0	0.7418709		FALSE	0	SERPINB5	100730	0.25360231
1341	3.60491368	7.79E-05	0.27739915	0	4	7	FALSE	CNBP	207.75	4	0	0	0.76318967		FALSE	0	CNBP	292106	0.26677419
1343	3.09904825	0.00250641	0.32267971	0.00689655	30	7	FALSE	GRIA1	29.53333333	30	0	0	0.80917743	mRNAdown	FALSE	0	GRIA1	2447236	0.04009324
1346	3.27324037	0.00142836	0.30550766	0.03157895	20	7	FALSE	VIM	121	20	0	0	0.79334178		FALSE	0	VIM	3784542	0.06782095
1348	3.46325808	5.94E-04	0.28874545	0.01666667	16	7	FALSE	PARP1	84.625	16	0	0	0.77606745		FALSE	0	PARP1	1367326	0.0795185
1351	3.89752103	1.35E-05	0.25657334	0	2	7	FALSE	PRSS50	107.5	2	0	0	0.736589		FALSE	0	PRSS50	16116	0.50235849
1353	3.33034529	0.00151549	0.30026917	0.00229885	30	7	FALSE	CUL3	58.53333333	30	0	0	0.78815043		FALSE	0	CUL3	3970768	0.04507042
1355	3.90659584	0	0.25597734	0	1	7	FALSE	AGR3	196	1	0	0	0.73576401		FALSE	0	AGR3	0	0
1357	3.90659584	0	0.25597734	0	1	7	FALSE	ATG4D	196	1	0	0	0.73576401		FALSE	0	ATG4D	0	0
1359	3.82591855	1.31E-04	0.26137514	0.0952381	7	7	FALSE	STK24	62.42857143	7	0	0	0.74309831		FALSE	0	STK24	282568	0.1606679
1361	3.63667552	4.88E-04	0.27497642	0	4	7	FALSE	ATP1A3	190.5	4	0	0	0.76030223		FALSE	0	ATP1A3	997702	0.25747283
1363	3.90659584	0	0.25597734	0	1	7	FALSE	PCYT1A	196	1	0	0	0.73576401		FALSE	0	PCYT1A	0	0
1366	3.89475432	7.02E-06	0.2567556	0	2	7	FALSE	IL24	107	2	0	0	0.73684052		FALSE	0	IL24	8848	0.50717703
1368	3.43238158	2.21E-04	0.2913429	0.0952381	7	7	FALSE	CDKN1B	175.8571429	7	0	0	0.7788744		FALSE	0	CDKN1B	666372	0.16334131
1370	3.57658256	7.95E-04	0.27959651	0.12380952	15	7	FALSE	CASP1	75.53333333	15	0	0	0.76576522		FALSE	0	CASP1	2131966	0.08406122
1372	3.90659584	0	0.25597734	0	1	7	FALSE	HBP1	196	1	0	0	0.73576401		FALSE	0	HBP1	0	0
1374	3.90659584	0	0.25597734	0	1	7	FALSE	VPS45	196	1	0	0	0.73576401		FALSE	0	VPS45	0	0
1376	3.79050465	5.86E-06	0.26381711	0	2	7	FALSE	PLEC1	148	2	0	0	0.74631776		FALSE	0	PLEC1	19448	0.51578947
1378	3.85325365	8.32E-06	0.25952094	0	2	7	FALSE	BEX1	127.5	2	0	0	0.7406133		FALSE	0	BEX1	14622	0.51422764
1380	3.61686587	4.59E-04	0.27648247	0	9	7	FALSE	CDH1	70.11111111	9	0	0	0.7621031		FALSE	0	CDH1	609198	0.118952
1382	3.90659584	0	0.25597734	0	1	7	FALSE	BLID	196	1	0	0	0.73576401		FALSE	0	BLID	0	0
1384	3.85325365	8.32E-06	0.25952094	0	2	7	FALSE	S100A14	127.5	2	0	0	0.7406133		FALSE	0	S100A14	14622	0.51422764
1386	3.18138557	0.00311503	0.31432845	0.03557312	23	7	FALSE	HSPA5	147.7826087	23	0	0	0.80169222		FALSE	0	HSPA5	9257158	0.06352928
1388	3.74977866	1.63E-05	0.26668241	0.33333333	4	7	FALSE	CASP6	117.5	4	0	0	0.75002012		FALSE	0	CASP6	62696	0.29987212
1390	3.73760514	6.75E-05	0.267551	0	4	7	FALSE	TSC22D3	134.75	4	0	0	0.75112681		FALSE	0	TSC22D3	153708	0.26021401
1392	3.16854803	0.00933755	0.31560197	0.00131579	96	7	FALSE	SPP1	10.46875	96	0	0	0.80285927	mRNAup	FALSE	0	SPP1	9110904	0.01475694
1394	3.64342629	1.78E-04	0.27446692	0	4	7	FALSE	ATAD2	219	4	0	0	0.75968852		FALSE	0	ATAD2	418874	0.25860024
1396	3.77777778	6.93E-06	0.26470588	0	2	7	FALSE	TOPORS	148	2	0	0	0.74747475		FALSE	0	TOPORS	22054	0.50865052
1398	3.62616202	1.71E-04	0.27577367	0	6	7	FALSE	MAPT	104.8333333	6	0	0	0.761258		FALSE	0	MAPT	299706	0.1759887
1400	3.90659584	0	0.25597734	0	1	7	FALSE	PSMC3IP	196	1	0	0	0.73576401		FALSE	0	PSMC3IP	0	0
1402	3.90659584	0	0.25597734	0	1	7	FALSE	CDH13	196	1	0	0	0.73576401		FALSE	0	CDH13	0	0
1404	3.32857459	0.00118133	0.3004289	0.03296703	14	7	FALSE	SQSTM1	147	14	0	0	0.7883114		FALSE	0	SQSTM1	3249328	0.08605042
1406	3.43525896	2.68E-04	0.29109887	0.07692308	13	7	FALSE	CHUK	117.3076923	13	0	0	0.77861282		FALSE	0	CHUK	943068	0.1024068
1409	3.48871182	7.12E-04	0.28663875	0.02222222	10	7	FALSE	CHD3	117.1	10	0	0	0.77375347		FALSE	0	CHD3	1369948	0.11357422
1411	3.28685259	4.69E-04	0.30424242	0	10	7	FALSE	YBX1	214.5	10	0	0	0.79210431		FALSE	0	YBX1	1959494	0.12970838
1413	3.77401505	4.00E-05	0.2649698	0.13333333	6	7	FALSE	CASP4	77.5	6	0	0	0.74781681		FALSE	0	CASP4	84994	0.20478723
1415	3.15128375	0.00135938	0.31733099	0.03333333	16	7	FALSE	NCL	189.8125	16	0	0	0.80442875		FALSE	0	NCL	4199978	0.08747687
1417	3.33200531	9.66E-04	0.30011957	0.09150327	18	7	FALSE	AR	119.2222222	18	0	0	0.78799952		FALSE	0	AR	2284912	0.07606838
1419	3.90659584	0	0.25597734	0	1	7	FALSE	PLA2G4B	196	1	0	0	0.73576401		FALSE	0	PLA2G4B	0	0
1421	3.6914564	3.73E-05	0.27089579	0.4	5	7	FALSE	CASP2	128	5	0	0	0.75532215		FALSE	0	CASP2	147868	0.24482759
1423	3.74479858	2.61E-04	0.26703706	0.19444444	9	7	FALSE	XIAP	69.33333333	9	0	0	0.75047286		FALSE	0	XIAP	769184	0.13939394
1425	3.73627711	3.40E-04	0.2676461	0	7	7	FALSE	TFCP2	59.85714286	7	0	0	0.75124754		FALSE	0	TFCP2	578980	0.14938361
1428	3.19953519	0.00190845	0.3125454	0.01587302	28	7	FALSE	MAPK1	99.17857143	28	0	0	0.80004226		FALSE	0	MAPK1	4823774	0.04958618
1431	3.85325365	8.32E-06	0.25952094	0	2	7	FALSE	GLCE	127.5	2	0	0	0.7406133		FALSE	0	GLCE	14622	0.51422764
1433	3.11077911	7.82E-04	0.32146288	0.09166667	16	7	FALSE	NLRC4	50.375	16	0	0	0.80811099	mRNAup	FALSE	0	NLRC4	728704	0.07022472
1435	3.88302346	1.77E-05	0.25753128	0	3	7	FALSE	LYPD3	77	3	0	0	0.73790696		FALSE	0	LYPD3	24092	0.33928571
1437	3.51217353	0.00248811	0.28472397	0	40	8	FALSE	CBX7	7.7	40	0	0	0.77162059	mRNAup	FALSE	0	CBX7	8015204	0.04110429
1438	3.91312528	2.70E-05	0.25555021	0	4	8	FALSE	CBX8	53.75	4	0	0	0.73517043		FALSE	0	CBX8	99040	0.25857843
1440	3.64995573	8.61E-05	0.27397593	0.14285714	7	7	FALSE	BMI1	107.7142857	7	0	0	0.75909493		FALSE	0	BMI1	378990	0.17910804
1442	4.51206286	0	0.22162812	0	1	9	FALSE	PCGF5	40	1	0	0	0.68072156		FALSE	0	PCGF5	0	0
1444	4.0897521	6.15E-06	0.2445136	0	3	9	FALSE	HMGA1	24	3	0	0	0.71911345		FALSE	0	HMGA1	33106	0.33333333
1446	4.09915892	4.74E-06	0.24395248	0	2	9	FALSE	RAD17	37.5	2	0	0	0.71825828		FALSE	0	RAD17	24618	0.50694444
1448	3.7208942	1.03E-04	0.2687526	0	4	8	FALSE	PCGF2	127.5	4	0	0	0.75264598		FALSE	0	PCGF2	251230	0.26190476
1450	3.65061974	5.72E-05	0.27392609	0.06666667	6	7	FALSE	HIST1H3A	120.5	6	0	0	0.75903457		FALSE	0	HIST1H3A	364620	0.19677066
1452	3.94643648	1.30E-05	0.25339316	0	3	8	FALSE	UBE4A	34.66666667	3	0	0	0.73214214		FALSE	0	UBE4A	33142	0.34006734
1454	3.41821602	0.0012934	0.29255026	0.01666667	16	7	FALSE	CSNK2B	90.125	16	0	0	0.78016218		FALSE	0	CSNK2B	3187772	0.0732582
1456	4.51206286	0	0.22162812	0	1	9	FALSE	SRBD1	40	1	0	0	0.68072156		FALSE	0	SRBD1	0	0
1458	3.43404161	0.00166391	0.29120206	0.00790514	23	7	FALSE	MOV10	65.08695652	23	0	0	0.77872349		FALSE	0	MOV10	3677138	0.05493361
1460	4.51206286	0	0.22162812	0	1	9	FALSE	PHC3	40	1	0	0	0.68072156		FALSE	0	PHC3	0	0
1462	3.73583444	8.66E-05	0.26767781	0	3	8	FALSE	USP20	169.3333333	3	0	0	0.75128778		FALSE	0	USP20	194938	0.34494536
1464	4.51206286	0	0.22162812	0	1	9	FALSE	PCGF3	40	1	0	0	0.68072156		FALSE	0	PCGF3	0	0
1466	3.26615759	0.00160589	0.30617016	0.01754386	19	7	FALSE	HDAC2	120.3157895	19	0	0	0.79398567		FALSE	0	HDAC2	4404270	0.07037152
1468	3.71735281	8.08E-05	0.26900863	0	4	8	FALSE	DCAF7	161	4	0	0	0.75296793		FALSE	0	DCAF7	280396	0.27164686
1470	3.16589199	0.00442987	0.31586675	0.01587302	28	7	FALSE	CSNK2A1	100.0357143	28	0	0	0.80310073		FALSE	0	CSNK2A1	7928684	0.04735248
1472	4.13966357	8.40E-07	0.24156552	0	2	9	FALSE	PCGF6	21.5	2	0	0	0.71457604		FALSE	0	PCGF6	16210	0.5125
1474	4.51206286	0	0.22162812	0	1	9	FALSE	SUV39H2	40	1	0	0	0.68072156		FALSE	0	SUV39H2	0	0
1476	4.51206286	0	0.22162812	0	1	9	FALSE	BCOR	40	1	0	0	0.68072156		FALSE	0	BCOR	0	0
1478	4.51206286	0	0.22162812	0	1	9	FALSE	PCGF1	40	1	0	0	0.68072156		FALSE	0	PCGF1	0	0
1480	3.52999115	5.15E-04	0.28328683	0.02197802	14	7	FALSE	UCHL5	67.71428571	14	0	0	0.7700008		FALSE	0	UCHL5	1246750	0.08567775
1482	3.76173085	3.69E-05	0.26583507	0	3	8	FALSE	HIST1H4A	190	3	0	0	0.74893356		FALSE	0	HIST1H4A	190570	0.35130112
1484	4.51206286	0	0.22162812	0	1	9	FALSE	CDC42SE1	40	1	0	0	0.68072156		FALSE	0	CDC42SE1	0	0
1486	3.96657813	4.15E-05	0.25210647	0	5	8	FALSE	PHC2	42.4	5	0	0	0.73031108		FALSE	0	PHC2	67586	0.24352941
1488	3.91345728	1.57E-05	0.25552853	0	3	8	FALSE	RING1	85	3	0	0	0.73514025		FALSE	0	RING1	92852	0.3559322
1490	3.43902169	6.01E-04	0.29078037	0.07352941	17	7	FALSE	RNF2	103.2352941	17	0	0	0.77827076		FALSE	0	RNF2	1821930	0.07426311
1492	3.56164232	3.53E-04	0.28076935	0.03571429	8	7	FALSE	TPR	141.625	8	0	0	0.76712343		FALSE	0	TPR	972856	0.14201109
1494	3.85878707	6.01E-04	0.25914879	0	11	8	FALSE	CCDC114	10.81818182	11	0	0	0.74011027	mRNAdown	FALSE	0	CCDC114	1884758	0.10121837
1495	4.85867641	0	0.20581737	0	1	9	FALSE	C1orf216	11	1	0	0	0.64921124		FALSE	0	C1orf216	0	0
1497	4.51770695	2.62E-06	0.22135123	0	2	9	FALSE	Q5VU62	25	2	0	0	0.68020846		FALSE	0	Q5VU62	6920	0.5106383
1499	3.8997344	2.89E-05	0.25642772	0	3	7	FALSE	HAUS1	46.66666667	3	0	0	0.73638778		FALSE	0	HAUS1	53014	0.3382716
1502	4.11376715	4.51E-06	0.24308619	0	2	9	FALSE	CCDC151	22	2	0	0	0.71693026		FALSE	0	CCDC151	17176	0.5
1504	3.88014608	0	0.25772226	0	1	7	FALSE	CCDC144NL	120	1	0	0	0.73816854	mRNAdown	FALSE	0	CCDC144NL	0	0
1506	3.65692784	0.00129453	0.27345358	0	39	8	FALSE	CCDC146	7.02564103	39	0	0	0.75846111	mRNAup	FALSE	0	CCDC146	2742364	0.04496747
1507	3.72399292	2.36E-04	0.26852897	0	7	7	FALSE	TSC22D4	70.28571429	7	0	0	0.75236428		FALSE	0	TSC22D4	301974	0.15396825
1509	3.75852147	5.18E-05	0.26606207	0	4	7	FALSE	H3BTW2	102.5	4	0	0	0.74922532		FALSE	0	H3BTW2	150320	0.27581522
1511	3.70894201	5.41E-04	0.26961867	0.01515152	12	7	FALSE	USHBP1	48.66666667	12	0	0	0.75373254		FALSE	0	USHBP1	1130838	0.09509609
1513	4.65681718	0	0.21473894	0	1	9	FALSE	A1L306	39	1	0	0	0.66756207		FALSE	0	A1L306	0	0
1515	3.93614431	7.29E-05	0.25405573	0	6	8	FALSE	DTNBP1	35.83333333	6	0	0	0.73307779		FALSE	0	DTNBP1	133288	0.17681895
1517	4.16301461	7.99E-06	0.24021054	0	3	8	FALSE	CCDC136	53.66666667	3	0	0	0.71245322		FALSE	0	CCDC136	22192	0.3872549
1519	3.91954405	7.35E-05	0.25513172	0	7	8	FALSE	CEP44	42.71428571	7	0	0	0.7345869		FALSE	0	CEP44	102016	0.18961039
1521	3.57248783	2.56E-04	0.27991698	0.01098901	14	7	FALSE	KRT40	50.35714286	14	0	0	0.76613747		FALSE	0	KRT40	572324	0.09252336
1523	3.87317397	4.91E-05	0.25818618	0	3	8	FALSE	RAB3IP	117.3333333	3	0	0	0.73880237		FALSE	0	RAB3IP	75172	0.33622351
1525	4.12450199	5.37E-05	0.24245351	0	4	8	FALSE	RINT1	46	4	0	0	0.71595436		FALSE	0	RINT1	56904	0.28125
1527	4.03607791	4.44E-06	0.24776529	0.33333333	3	8	FALSE	SPERT	49.66666667	3	0	0	0.72399292		FALSE	0	SPERT	17674	0.38242894
1530	4.03486056	2.59E-05	0.24784004	0	4	8	FALSE	CEP170P1	31.5	4	0	0	0.72410359		FALSE	0	CEP170P1	37758	0.25847458
1532	3.18559097	6.63E-05	0.3139135	0	5	8	FALSE	CCDC42	98.6	5	0	0	0.80130991	mRNAdown	FALSE	0	CCDC42	131638	0.20634249
1535	4.28209385	1.36E-04	0.23353061	0	4	8	FALSE	CCL17	10.75	4	0	0	0.70162783	mRNAup	FALSE	0	CCL17	237318	0.26351351
1536	3.32027446	0.00180372	0.30117992	0.01	25	7	FALSE	VCAM1	70.2	25	0	0	0.78906596		FALSE	0	VCAM1	4944378	0.05384019
1538	3.72598495	0.00102255	0.26838541	0.04137931	30	8	FALSE	CCL2	9.43333333	30	0	0	0.75218319	mRNAup	FALSE	0	CCL2	1251238	0.05741935
1539	4.00498008	1.10E-05	0.24968913	0	3	7	FALSE	CDC45	39.66666667	3	0	0	0.72681999		FALSE	0	CDC45	33882	0.36137072
1541	3.41766268	5.23E-04	0.29259763	0.05555556	9	7	FALSE	MCM7	133.7777778	9	0	0	0.78021248		FALSE	0	MCM7	881982	0.12325103
1543	4.01726428	2.88E-05	0.24892562	0	3	7	FALSE	CDC6	32.33333333	3	0	0	0.72570325		FALSE	0	CDC6	91560	0.35606061
1545	4.39065958	2.11E-06	0.22775621	0	3	9	FALSE	ACKR1	19.33333333	3	0	0	0.69175822		FALSE	0	ACKR1	3424	0.35947712
1547	3.97310757	1.41E-04	0.25169215	0	9	8	FALSE	MMP12	26.11111111	9	0	0	0.72971749		FALSE	0	MMP12	108362	0.13356974
1549	3.82027446	3.48E-04	0.2617613	0.1	16	7	FALSE	VCAN	22.75	16	0	0	0.74361141		FALSE	0	VCAN	492694	0.08035714
1551	4.29426737	7.80E-07	0.23286859	0.33333333	3	9	FALSE	ACKR2	29.66666667	3	0	0	0.70052115		FALSE	0	ACKR2	3912	0.45128205
1553	4.02965914	4.09E-06	0.24815995	0	2	7	FALSE	ORC4	42	2	0	0	0.72457644		FALSE	0	ORC4	15802	0.53947368
1555	3.43736166	4.07E-04	0.2909208	0.04761905	7	7	FALSE	MCM3	236.1428571	7	0	0	0.77842167		FALSE	0	MCM3	1073554	0.16852439
1557	4.1938911	2.65E-05	0.23844205	0.10714286	8	9	FALSE	DARC	18	8	0	0	0.70964626	mRNAup	FALSE	0	DARC	52900	0.19021739
1559	4.02965914	4.09E-06	0.24815995	0	2	7	FALSE	ORC2	42	2	0	0	0.72457644		FALSE	0	ORC2	15802	0.53947368
1561	3.92208942	1.67E-04	0.25496614	0	5	7	FALSE	MCM2	60.4	5	0	0	0.73435551		FALSE	0	MCM2	159402	0.20989399
1563	3.48085436	3.75E-04	0.28728579	0.06666667	10	7	FALSE	PCNA	139.9	10	0	0	0.77446779		FALSE	0	PCNA	639130	0.11371429
1565	4.85402833	0	0.20601445	0	1	8	FALSE	CCL24	20	1	0	0	0.64963379	mRNAup	FALSE	0	CCL24	0	0
1566	3.854139	0.00125469	0.25946132	0.02631579	20	7	FALSE	CCR3	14.95	20	0	0	0.74053282	mRNAup	FALSE	0	CCR3	1841470	0.07409326
1568	3.82447986	6.38E-04	0.26147346	0.01428571	21	8	FALSE	CCL7	14.0952381	21	0	0	0.7432291	mRNAup	FALSE	0	CCL7	661062	0.06666667
1569	3.69433378	4.11E-04	0.2706848	0	11	8	FALSE	UBQLN1	50.90909091	11	0	0	0.75506057		FALSE	0	UBQLN1	1115238	0.10311796
1571	4.27932714	2.23E-06	0.2336816	0.16666667	4	8	FALSE	ACKR4	18.75	4	0	0	0.70187935		FALSE	0	ACKR4	6818	0.35096154
1573	4.3643205	6.57E-06	0.22913074	0	2	7	FALSE	FEZ1	20	2	0	0	0.69415268		FALSE	0	FEZ1	5332	0.5
1576	3.61066844	6.67E-04	0.27695703	0.12087912	14	8	FALSE	CCR2	25.71428571	14	0	0	0.76266651	mRNAup	FALSE	0	CCR2	694622	0.09348739
1577	4.44909252	6.40E-07	0.22476494	0	3	8	FALSE	CCL26	22	3	0	0	0.68644613		FALSE	0	CCL26	1522	0.47727273
1580	4.31673307	7.26E-06	0.23165667	0.2	5	8	FALSE	CCL11	21.4	5	0	0	0.69847881		FALSE	0	CCL11	7716	0.2625
1584	3.46403276	0.00241205	0.28868087	0.02418208	38	8	FALSE	CCL5	12.5	38	0	0	0.77599702	mRNAup	FALSE	0	CCL5	3505660	0.03849429
1589	4.43271359	2.23E-05	0.22559545	0.06666667	6	8	FALSE	CXCL10	14.33333333	6	0	0	0.68793513	mRNAup	FALSE	0	CXCL10	22836	0.22043011
1591	2.94687915	0.00822825	0.33934205	0.02686869	100	6	FALSE	HCK	25.33	100	0	0	0.82301099	mRNAup	FALSE	0	HCK	13343204	0.02005632
1593	4.47277556	1.59E-06	0.22357482	0	4	8	FALSE	CCL3L3	17	4	0	0	0.68429313	mRNAup	FALSE	0	CCL3L3	3092	0.36363636
1595	3.02401505	0.00182949	0.33068618	0.04804805	37	6	FALSE	FGR	42.54054054	37	0	0	0.81599863	mRNAup	FALSE	0	FGR	3123992	0.04333788
1597	3.78939796	3.94E-04	0.26389416	0.09090909	12	7	FALSE	CCL3	22.66666667	12	0	0	0.74641837	mRNAup	FALSE	0	CCL3	257494	0.09549356
1599	3.89198761	1.23E-05	0.25693813	0	5	8	FALSE	CD163	13.4	5	0	0	0.73709204	mRNAup	FALSE	0	CD163	42736	0.21754386
1600	3.76870297	8.48E-05	0.26534328	0.06666667	6	7	FALSE	HP	68.83333333	6	0	0	0.74829973		FALSE	0	HP	161160	0.17891514
1603	3.66555998	2.32E-04	0.27280961	0	8	8	FALSE	CD1D	15.75	8	0	0	0.75767637	mRNAup	FALSE	0	CD1D	126602	0.13785047
1604	3.7166888	2.81E-05	0.26905669	0.2	5	7	FALSE	B2M	88.8	5	0	0	0.75302829		FALSE	0	B2M	29164	0.21047619
1606	2.93182824	0.00488155	0.3410841	0.04701754	76	7	FALSE	PTPRC	34.13157895	76	0	0	0.82437925	mRNAup	FALSE	0	PTPRC	6240454	0.02334846
1608	4.66544931	0	0.21434163	0	1	9	FALSE	P4HTM	8	1	0	0	0.66677734		FALSE	0	P4HTM	0	0
1610	3.50874281	2.29E-04	0.28500237	0.04761905	7	7	FALSE	CALR	181.8571429	7	0	0	0.77193247		FALSE	0	CALR	624298	0.15945674
1612	3.7187915	6.56E-05	0.26890456	0.33333333	6	8	FALSE	TRB	101.8333333	6	0	0	0.75283714		FALSE	0	TRB	123036	0.18288288
1614	3.6518371	2.79E-04	0.27383478	0.08888889	10	8	FALSE	CD74	52.9	10	0	0	0.7589239		FALSE	0	CD74	264310	0.10962343
1617	3.08499336	0.00200977	0.32414981	0.03988604	27	7	FALSE	CD2	37.44444444	27	0	0	0.81045515	mRNAup	FALSE	0	CD2	1562584	0.04671931
1618	3.7335104	7.69E-05	0.26784444	0.02222222	10	8	FALSE	CD53	11.4	10	0	0	0.75149905	mRNAup	FALSE	0	CD53	88254	0.12045455
1621	3.39884905	6.45E-04	0.29421724	0.06432749	19	7	FALSE	CD4	63.89473684	19	0	0	0.78192281		FALSE	0	CD4	892760	0.06555863
1623	3.48483842	0.00113509	0.28695735	0.01818182	11	8	FALSE	LGALS1	100.0909091	11	0	0	0.7741056		FALSE	0	LGALS1	2846086	0.10202747
1625	2.96469677	0.02480771	0.33730262	0.00538985	196	7	FALSE	CD247	11.47959184	196	0	0	0.8213912	mRNAup	FALSE	0	CD247	31794012	0.01040203
1627	3.26604692	0.00143554	0.30618054	0.13650794	36	7	FALSE	LCK	67.33333333	36	0	0	0.79399573		FALSE	0	LCK	2053258	0.04477364
1629	4.08488269	0	0.24480507	0	1	8	FALSE	kbp-3	27	1	0	0	0.71955612		FALSE	0	kbp-3	0	0
1631	3.63191678	5.20E-05	0.27533671	0	4	7	FALSE	LYAR	209.75	4	0	0	0.76073484		FALSE	0	LYAR	148220	0.30698529
1633	4.08488269	0	0.24480507	0	1	8	FALSE	CD58	27	1	0	0	0.71955612		FALSE	0	CD58	0	0
1635	4.03906596	6.21E-06	0.24758199	0	2	8	FALSE	CD59	30.5	2	0	0	0.72372128		FALSE	0	CD59	37458	0.50862069
1637	3.73804781	1.56E-04	0.26751932	0.23809524	7	8	FALSE	CD5	74.14285714	7	0	0	0.75108656		FALSE	0	CD5	324630	0.16742081
1639	4.08488269	0	0.24480507	0	1	8	FALSE	LINC00311	27	1	0	0	0.71955612		FALSE	0	LINC00311	0	0
1641	3.58145197	3.84E-04	0.27921636	0.09090909	12	7	FALSE	CD48	28.66666667	12	0	0	0.76532255	mRNAup	FALSE	0	CD48	245094	0.09683908
1643	3.6686587	3.49E-05	0.27257919	0.38095238	7	7	FALSE	ITK	85.71428571	7	0	0	0.75739466		FALSE	0	ITK	72974	0.17753408
1646	3.52379371	0.0033125	0.28378506	9.25E-04	47	7	FALSE	CD274	5.44680851	47	0	0	0.77056421	mRNAup	FALSE	0	CD274	2440812	0.02672239
1647	4.36686587	3.12E-06	0.22899719	0	2	8	FALSE	TTI1	31	2	0	0	0.69392128		FALSE	0	TTI1	4446	0.52631579
1649	4.52368305	0	0.22105881	0	1	8	FALSE	INTS2	47	1	0	0	0.67966518		FALSE	0	INTS2	0	0
1652	3.79836211	1.25E-04	0.26327137	0	4	7	FALSE	CDK5RAP3	87	4	0	0	0.74560344		FALSE	0	CDK5RAP3	115956	0.26139818
1654	3.89862771	3.04E-05	0.25650051	0	3	8	FALSE	ATR	75.33333333	3	0	0	0.73648839		FALSE	0	ATR	38292	0.35566188
1656	3.89309429	2.30E-04	0.25686509	0	7	7	FALSE	SAAL1	35.42857143	7	0	0	0.73699143		FALSE	0	SAAL1	311562	0.15508366
1658	3.68260292	6.34E-05	0.27154706	0	2	8	FALSE	XPO7	351.5	2	0	0	0.75612701		FALSE	0	XPO7	72772	0.502149
1660	4.45208057	8.13E-06	0.22461408	0	2	8	FALSE	VAC14	28	2	0	0	0.68617449		FALSE	0	VAC14	3944	0.5
1662	4.12372731	1.04E-06	0.24249906	0	2	8	FALSE	COG1	31.5	2	0	0	0.71602479		FALSE	0	COG1	1596	0.54464286
1664	3.68714033	4.67E-04	0.27121289	0.03571429	8	7	FALSE	ATM	93.75	8	0	0	0.75571452		FALSE	0	ATM	629800	0.14155251
1666	4.12372731	1.04E-06	0.24249906	0	2	8	FALSE	COG2	31.5	2	0	0	0.71602479		FALSE	0	COG2	1596	0.54464286
1668	4.52368305	0	0.22105881	0	1	8	FALSE	FAM114A2	47	1	0	0	0.67966518		FALSE	0	FAM114A2	0	0
1670	4.06363435	8.82E-06	0.24608513	0	2	8	FALSE	USP22	40.5	2	0	0	0.72148779		FALSE	0	USP22	9302	0.5
1672	4.10325365	6.92E-06	0.24370904	0	3	8	FALSE	COG5	24.66666667	3	0	0	0.71788603		FALSE	0	COG5	12664	0.35858586
1674	4.52368305	0	0.22105881	0	1	8	FALSE	TNPO3	47	1	0	0	0.67966518		FALSE	0	TNPO3	0	0
1676	4.52368305	0	0.22105881	0	1	8	FALSE	XPO6	47	1	0	0	0.67966518		FALSE	0	XPO6	0	0
1679	3.80544489	7.94E-05	0.26278136	0	3	7	FALSE	UTP20	217	3	0	0	0.74495956		FALSE	0	UTP20	103820	0.41538462
1682	4.3106463	3.47E-06	0.23198377	0	2	8	FALSE	SLC39A11	31.5	2	0	0	0.69903215		FALSE	0	SLC39A11	4566	0.50833333
1685	4.52368305	0	0.22105881	0	1	8	FALSE	EXOC7	47	1	0	0	0.67966518		FALSE	0	EXOC7	0	0
1687	3.97067286	2.16E-05	0.25184648	0.33333333	3	8	FALSE	STAG1	42	3	0	0	0.72993883		FALSE	0	STAG1	13582	0.34722222
1689	3.62051793	1.50E-04	0.27620358	0.16666667	4	7	FALSE	HIP1R	235.25	4	0	0	0.7617711		FALSE	0	HIP1R	163296	0.26645857
1691	4.03463922	1.44E-05	0.24785364	0	2	8	FALSE	THADA	48	2	0	0	0.72412371		FALSE	0	THADA	8908	0.5
1693	4.27368305	8.36E-05	0.23399021	0	3	8	FALSE	MINPP1	46.66666667	3	0	0	0.70239245		FALSE	0	MINPP1	83682	0.33578431
1695	4.12372731	1.04E-06	0.24249906	0	2	8	FALSE	COG3	31.5	2	0	0	0.71602479		FALSE	0	COG3	1596	0.54464286
1697	4.52368305	0	0.22105881	0	1	8	FALSE	DOLK	47	1	0	0	0.67966518		FALSE	0	DOLK	0	0
1699	3.80942895	1.13E-04	0.26250654	0	3	7	FALSE	NUP85	176.6666667	3	0	0	0.74459737		FALSE	0	NUP85	122622	0.33978079
1701	3.05068614	0.00387417	0.32779511	0.0058072	42	6	FALSE	NF1	28.26190476	42	0	0	0.81357399	mRNAup	FALSE	0	NF1	5805536	0.03665204
1703	4.28618858	6.44E-06	0.23330751	0	2	7	FALSE	XPO4	47	2	0	0	0.70125558		FALSE	0	XPO4	9484	0.53488372
1705	4.12372731	1.04E-06	0.24249906	0	2	8	FALSE	COG4	31.5	2	0	0	0.71602479		FALSE	0	COG4	1596	0.54464286
1707	3.68072156	8.60E-05	0.27168586	0	3	8	FALSE	EXOC1	237.6666667	3	0	0	0.75629804		FALSE	0	EXOC1	142842	0.33522191
1709	3.88424081	2.96E-05	0.25745057	0	2	8	FALSE	PDCD1	92.5	2	0	0	0.73779629		FALSE	0	PDCD1	29280	0.50274725
1711	4.12372731	1.04E-06	0.24249906	0	2	8	FALSE	COG7	31.5	2	0	0	0.71602479		FALSE	0	COG7	1596	0.54464286
1713	3.58787074	2.21E-04	0.27871684	0	5	8	FALSE	GCN1L1	217.8	5	0	0	0.76473902		FALSE	0	GCN1L1	549378	0.22145046
1715	3.97288623	2.96E-05	0.25170618	0	4	7	FALSE	TNPO2	32.75	4	0	0	0.72973762		FALSE	0	TNPO2	30214	0.2690678
1717	3.90648517	1.61E-05	0.25598459	0	2	7	FALSE	KIAA1524	65	2	0	0	0.73577408		FALSE	0	KIAA1524	13742	0.5
1719	4.52368305	0	0.22105881	0	1	8	FALSE	SLC7A3	47	1	0	0	0.67966518		FALSE	0	SLC7A3	0	0
1721	3.97996901	6.26E-06	0.25125824	0	2	8	FALSE	PDS5B	45	2	0	0	0.72909373		FALSE	0	PDS5B	5670	0.50574713
1723	3.58499336	4.21E-04	0.27894054	0	5	7	FALSE	HEATR1	213.2	5	0	0	0.7650006		FALSE	0	HEATR1	698092	0.21586979
1725	3.98959717	1.83E-05	0.25065187	0	3	8	FALSE	KIF14	45.33333333	3	0	0	0.72821844		FALSE	0	KIF14	21872	0.34908136
1727	4.46181939	9.21E-06	0.22412382	0	2	8	FALSE	TMEM160	30	2	0	0	0.68528915		FALSE	0	TMEM160	12464	0.5
1729	3.8001328	5.49E-05	0.2631487	0	2	8	FALSE	PI4KA	192.5	2	0	0	0.74544247		FALSE	0	PI4KA	46554	0.5013089
1732	4.0396193	2.18E-05	0.24754808	0	2	8	FALSE	TNPO1	60	2	0	0	0.72367097		FALSE	0	TNPO1	14194	0.5
1734	3.66788402	1.08E-05	0.27263676	0.27777778	9	7	FALSE	CD38	42.11111111	9	0	0	0.75746509	mRNAup	FALSE	0	CD38	14196	0.14444444
1736	3.08023462	0.0020826	0.32465059	0.05832148	38	7	FALSE	CD3E	32.5	38	0	0	0.81088776	mRNAup	FALSE	0	CD3E	2303176	0.03784254
1738	3.62793271	1.58E-04	0.27563907	0.02777778	9	8	FALSE	CD9	65.55555556	9	0	0	0.76109703		FALSE	0	CD9	199348	0.11973711
1740	3.55987162	1.71E-04	0.28090901	0.18421053	20	7	FALSE	ZAP70	50.55	20	0	0	0.7672844		FALSE	0	ZAP70	219328	0.07659574
1742	3.12195662	8.99E-04	0.32031195	0.08421053	20	8	FALSE	CD3D	44.2	20	0	0	0.80709485	mRNAup	FALSE	0	CD3D	923530	0.06196884
1743	3.10546702	0.0032799	0.32201276	0.02365591	31	7	FALSE	VCP	122.6451613	31	0	0	0.80859391		FALSE	0	VCP	7691618	0.04760707
1745	3.7394865	9.29E-05	0.2674164	0	5	8	FALSE	AMFR	78.4	5	0	0	0.75095577		FALSE	0	AMFR	76184	0.20806452
1747	4.12184595	0	0.24260975	0	1	9	FALSE	PDIA2	20	1	0	0	0.71619582		FALSE	0	PDIA2	0	0
1750	3.9210934	1.93E-05	0.25503091	0	5	8	FALSE	DERL1	33	5	0	0	0.73444605		FALSE	0	DERL1	30080	0.21333333
1754	4.12184595	0	0.24260975	0	1	9	FALSE	CD8B	20	1	0	0	0.71619582		FALSE	0	CD8B	0	0
1756	3.12616202	4.93E-04	0.31988105	0.21818182	11	7	FALSE	CD3G	69.36363636	11	0	0	0.80671254	mRNAup	FALSE	0	CD3G	329504	0.10775984
1758	4.12605135	0	0.24236247	0	1	8	FALSE	TRD	11	1	0	0	0.71581351		FALSE	0	TRD	0	0
1765	4.12605135	0	0.24236247	0	1	8	FALSE	O45629	11	1	0	0	0.71581351		FALSE	0	O45629	0	0
1767	3.72421425	4.22E-05	0.26851302	0.33333333	4	8	FALSE	TRA	141.25	4	0	0	0.75234416		FALSE	0	TRA	94974	0.26503759
1769	2.95562196	0.0079163	0.33833826	0.01204819	84	7	FALSE	CD44	24.72619048	84	0	0	0.82221619	mRNAup	FALSE	0	CD44	10541276	0.02024308
1770	3.44588313	0.00103905	0.29020137	0.02339181	19	7	FALSE	CAV1	59.15789474	19	0	0	0.77764699		FALSE	0	CAV1	1663556	0.06487148
1772	3.87649402	2.38E-05	0.25796506	0	4	8	FALSE	WASL	40.25	4	0	0	0.73850054		FALSE	0	WASL	75362	0.26883562
1774	3.73505976	1.29E-05	0.26773333	0	2	8	FALSE	GARS	211	2	0	0	0.7513582		FALSE	0	GARS	29530	0.50847458
1776	3.95551129	0	0.25281182	0	1	8	FALSE	E9PJ24	84	1	0	0	0.73131716		FALSE	0	E9PJ24	0	0
1778	3.83787074	6.51E-05	0.26056115	0	6	8	FALSE	HGF	46.5	6	0	0	0.74201175		FALSE	0	HGF	82758	0.1743295
1780	3.88556884	5.26E-06	0.25736257	0	2	8	FALSE	BAG1	61.5	2	0	0	0.73767556		FALSE	0	BAG1	12734	0.51709402
1782	3.28220452	0.00126455	0.30467328	0.05789474	20	7	FALSE	MSN	114.5	20	0	0	0.79252686		FALSE	0	MSN	2227200	0.06547278
1788	3.85712705	5.65E-05	0.25926032	0.1	5	7	FALSE	LGALS9	42.4	5	0	0	0.74026118		FALSE	0	LGALS9	90162	0.21218274
1790	3.12859672	0.00313715	0.31963212	0.05347594	34	7	FALSE	STAT3	94.44117647	34	0	0	0.80649121		FALSE	0	STAT3	6123600	0.04420744
1794	3.73992917	2.88E-05	0.26738474	0	3	8	FALSE	ARHGEF12	170	3	0	0	0.75091553		FALSE	0	ARHGEF12	83760	0.34560327
1796	3.19820717	0.00588325	0.31267518	0.01352657	46	7	FALSE	FN1	53.39130435	46	0	0	0.80016298		FALSE	0	FN1	12205160	0.03131777
1799	3.55146082	1.47E-04	0.28157427	0.19166667	16	7	FALSE	MET	77.6875	16	0	0	0.76804902		FALSE	0	MET	316010	0.10607877
1801	3.95551129	0	0.25281182	0	1	8	FALSE	MADCAM1	84	1	0	0	0.73131716		FALSE	0	MADCAM1	0	0
1803	3.5669544	6.35E-04	0.28035121	0.0952381	7	8	FALSE	FLOT2	142.2857143	7	0	0	0.76664051		FALSE	0	FLOT2	660262	0.15189098
1805	3.03286853	0.00730163	0.32972085	0.03771044	55	7	FALSE	SRC	75.69090909	55	0	0	0.81519377		FALSE	0	SRC	12515500	0.02881279
1807	3.47565294	0.00140197	0.28771572	0.06333333	25	7	FALSE	ERBB2	46.32	25	0	0	0.77494064		FALSE	0	ERBB2	3360874	0.0613369
1809	3.43404161	9.16E-04	0.29120206	0.025	16	7	FALSE	CD81	83	16	0	0	0.77872349		FALSE	0	CD81	1443350	0.07245819
1811	4	3.60E-06	0.25	0.16666667	4	9	FALSE	IL4	20.25	4	0	0	0.72727273		FALSE	0	IL4	3600	0.27054795
1813	4.04050465	1.09E-06	0.24749384	0	2	9	FALSE	IL2	24.5	2	0	0	0.72359049		FALSE	0	IL2	1320	0.51086957
1815	3.4561753	0.00125394	0.28933718	0.04285714	21	7	FALSE	PRKCA	62.85714286	21	0	0	0.77671134		FALSE	0	PRKCA	2766366	0.06399882
1817	3.90925188	4.17E-05	0.25580342	0.28571429	7	8	FALSE	CD82	23.28571429	7	0	0	0.73552256		FALSE	0	CD82	34224	0.17270789
1820	3.1791722	6.00E-04	0.31454729	0.07142857	8	8	FALSE	CD86	64	8	0	0	0.80189344	mRNAup	FALSE	0	CD86	402714	0.1306701
1822	4.08787074	2.15E-06	0.24462613	0	2	9	FALSE	43525	27	2	0	0	0.71928448		FALSE	0	43525	1598	0.50980392
1824	3.97941567	2.33E-04	0.25129318	0.2	5	8	FALSE	CD80	16.4	5	0	0	0.72914403	mRNAup	FALSE	0	CD80	123728	0.21333333
1827	3.39298362	3.70E-04	0.29472586	0.07894737	20	7	FALSE	CTLA4	36.2	20	0	0	0.78245603	mRNAup	FALSE	0	CTLA4	389622	0.06792453
1829	4.05046481	8.20E-07	0.24688525	0	2	8	FALSE	ECE2	28.5	2	0	0	0.72268502		FALSE	0	ECE2	764	0.50925926
1831	3.75830013	6.19E-05	0.26607774	0.13333333	6	8	FALSE	CD28	70.5	6	0	0	0.74924544		FALSE	0	CD28	51876	0.19276557
1833	3.16987605	0.00147889	0.31546975	0	17	8	FALSE	CD99L2	33.52941176	17	0	0	0.80273854	mRNAup	FALSE	0	CD99L2	1583620	0.06693295
1836	3.87892873	5.54E-05	0.25780314	0	5	7	FALSE	KLC3	36.8	5	0	0	0.73827921		FALSE	0	KLC3	49038	0.21058824
1838	4.16976538	0	0.23982165	0	1	9	FALSE	KIF21A	17	1	0	0	0.71183951		FALSE	0	KIF21A	0	0
1840	4.16976538	0	0.23982165	0	1	9	FALSE	VPS26A	17	1	0	0	0.71183951		FALSE	0	VPS26A	0	0
1844	3.88081009	7.14E-05	0.25767816	0	3	8	FALSE	LLGL2	93.33333333	3	0	0	0.73810817		FALSE	0	LLGL2	287696	0.33698297
1846	3.14674635	8.40E-04	0.31778856	0.01470588	17	7	FALSE	CDC42EP1	38.88235294	17	0	0	0.80484124	mRNAup	FALSE	0	CDC42EP1	1238260	0.07208111
1847	3.91699867	5.67E-06	0.25529751	0	3	8	FALSE	RHOQ	53.33333333	3	0	0	0.7348183		FALSE	0	RHOQ	10724	0.3536036
1849	3.67175741	2.68E-05	0.27234915	0.16666667	4	7	FALSE	MAPKAP1	163	4	0	0	0.75711296		FALSE	0	MAPKAP1	85758	0.27730375
1851	3.34805224	0.00246149	0.29868112	0.01176471	35	6	FALSE	DEF6	13.34285714	35	0	0	0.78654071	mRNAup	FALSE	0	DEF6	1858286	0.03618502
1855	3.87649402	2.23E-05	0.25796506	0	5	7	FALSE	PTBP3	45.4	5	0	0	0.73850054		FALSE	0	PTBP3	47696	0.21553398
1857	3.78773794	1.15E-04	0.26400982	0	7	7	FALSE	FHL3	38.28571429	7	0	0	0.74656928		FALSE	0	FHL3	184684	0.14737436
1859	3.95462594	6.72E-05	0.25286842	0.03571429	8	7	FALSE	PLSCR1	17.375	8	0	0	0.73139764		FALSE	0	PLSCR1	239612	0.13739669
1861	3.99756529	5.08E-05	0.25015226	0	4	8	FALSE	KRTAP4-12	28.25	4	0	0	0.72749406		FALSE	0	KRTAP4-12	139546	0.25707547
1863	3.73804781	3.23E-04	0.26751932	0	9	7	FALSE	MDFI	44	9	0	0	0.75108656		FALSE	0	MDFI	756900	0.125
1865	3.73727313	2.82E-04	0.26757477	0	9	7	FALSE	RBPMS	44.11111111	9	0	0	0.75115699		FALSE	0	RBPMS	510762	0.1204221
1867	3.91699867	5.67E-06	0.25529751	0	3	8	FALSE	RHOJ	53.33333333	3	0	0	0.7348183		FALSE	0	RHOJ	10724	0.3536036
1869	3.19079239	3.03E-04	0.31340178	0	8	8	FALSE	CDKN3	66	8	0	0	0.80083706	mRNAup	FALSE	0	CDKN3	374312	0.13829787
1870	3.86874723	4.87E-06	0.25848161	0	2	9	FALSE	CDK3	188.5	2	0	0	0.7392048		FALSE	0	CDK3	5880	0.5013369
1873	3.9039398	2.39E-05	0.25615149	0	5	7	FALSE	CDC25A	37	5	0	0	0.73600547		FALSE	0	CDC25A	43546	0.21176471
1878	3.16810536	0.00216206	0.31564607	0.03333333	21	8	FALSE	CENPP	27.80952381	21	0	0	0.80289951	mRNAdown	FALSE	0	CENPP	1802768	0.05169292
1879	3.97100487	3.81E-05	0.25182543	0.16666667	4	8	FALSE	ITGB3BP	48.5	4	0	0	0.72990865		FALSE	0	ITGB3BP	44008	0.26519337
1881	4.16799469	0	0.23992353	0	1	9	FALSE	INA	21	1	0	0	0.71200048		FALSE	0	INA	0	0
1883	4.12959274	0	0.24215463	1	2	8	FALSE	CENPH	34	2	0	0	0.71549157		FALSE	0	CENPH	0	0.56666667
1885	4.12959274	0	0.24215463	1	2	8	FALSE	CENPQ	34	2	0	0	0.71549157		FALSE	0	CENPQ	0	0.56666667
1887	4.0459274	3.56E-06	0.24716212	0	2	7	FALSE	Q5T203	40	2	0	0	0.72309751		FALSE	0	Q5T203	6684	0.51315789
1889	4.12959274	0	0.24215463	1	2	8	FALSE	CENPI	34	2	0	0	0.71549157		FALSE	0	CENPI	0	0.56666667
1892	3.48627711	0.00327021	0.28683893	0.00647549	47	7	FALSE	CENPU	5.25531915	47	0	0	0.77397481	mRNAup	FALSE	0	CENPU	2571256	0.0273181
1894	4.48616645	0	0.22290747	0	1	8	FALSE	STRA13	47	1	0	0	0.68307578		FALSE	0	STRA13	0	0
1896	3.84727756	2.55E-05	0.25992406	0	2	7	FALSE	KPNA6	126	2	0	0	0.74115659		FALSE	0	KPNA6	36068	0.50403226
1898	4.48616645	0	0.22290747	0	1	8	FALSE	NHS	47	1	0	0	0.68307578		FALSE	0	NHS	0	0
1900	3.94864985	6.73E-05	0.25325112	0	3	8	FALSE	LAMC1	122.3333333	3	0	0	0.73194092		FALSE	0	LAMC1	97500	0.34082397
1902	3.50453741	0.00193697	0.28534436	0.01230769	26	8	FALSE	ROBO2	13.46153846	26	0	0	0.77231478	mRNAdown	FALSE	0	ROBO2	1169888	0.04134302
1905	3.98638778	3.44E-05	0.25085367	0	4	8	FALSE	GIT1	41	4	0	0	0.7285102		FALSE	0	GIT1	55148	0.25806452
1907	4.48616645	0	0.22290747	0	1	8	FALSE	CENPK	47	1	0	0	0.68307578		FALSE	0	CENPK	0	0
1909	4.00531208	1.89E-05	0.24966844	0	2	8	FALSE	GOLGA3	122.5	2	0	0	0.72678981		FALSE	0	GOLGA3	25242	0.50625
1912	3.60602036	2.53E-04	0.27731402	0	5	8	FALSE	EIF4G1	191.8	5	0	0	0.76308906		FALSE	0	EIF4G1	384408	0.21129568
1915	4.48616645	0	0.22290747	0	1	8	FALSE	SPTY2D1	47	1	0	0	0.68307578		FALSE	0	SPTY2D1	0	0
1917	3.79526339	7.23E-05	0.26348632	0.16666667	4	8	FALSE	CENPM	118.5	4	0	0	0.74588515		FALSE	0	CENPM	100806	0.25877193
1919	4.48616645	0	0.22290747	0	1	8	FALSE	CENPL	47	1	0	0	0.68307578		FALSE	0	CENPL	0	0
1922	3.69754316	1.16E-04	0.27044985	0.33333333	3	8	FALSE	PGRMC1	226.3333333	3	0	0	0.7547688		FALSE	0	PGRMC1	84040	0.353125
1924	3.55909695	1.99E-04	0.28097015	0.16666667	4	8	FALSE	NDUFS2	272.25	4	0	0	0.76735482		FALSE	0	NDUFS2	360110	0.27229459
1926	4.12959274	0	0.24215463	1	2	8	FALSE	CENPN	34	2	0	0	0.71549157		FALSE	0	CENPN	0	0.56666667
1928	4.02335104	4.70E-05	0.24854903	0	3	8	FALSE	ZMYM1	47.66666667	3	0	0	0.72514991		FALSE	0	ZMYM1	60684	0.33333333
1930	3.73262506	3.68E-04	0.26790797	0	4	8	FALSE	SIPA1L1	136	4	0	0	0.75157954		FALSE	0	SIPA1L1	233600	0.25519849
1932	3.93536963	1.61E-04	0.25410574	0	4	8	FALSE	PLXNB1	31.75	4	0	0	0.73314822		FALSE	0	PLXNB1	227804	0.25204918
1934	4.08753873	6.77E-06	0.244646	0	2	8	FALSE	SPTBN4	46	2	0	0	0.71931466		FALSE	0	SPTBN4	7962	0.50561798
1936	4.48616645	0	0.22290747	0	1	8	FALSE	METTL2B	47	1	0	0	0.68307578		FALSE	0	METTL2B	0	0
1938	4.4042718	5.18E-05	0.22705229	0	3	8	FALSE	PLXNB2	27.66666667	3	0	0	0.69052075		FALSE	0	PLXNB2	79422	0.33755274
1940	3.84915892	3.78E-05	0.25979702	0	2	8	FALSE	CENPF	208	2	0	0	0.74098555		FALSE	0	CENPF	51882	0.50242718
1942	3.34030544	6.70E-04	0.29937382	0.06666667	10	7	FALSE	RPL10	173.2	10	0	0	0.78724496		FALSE	0	RPL10	1468124	0.12230878
1945	3.69134573	3.59E-04	0.27090391	0.06060606	12	8	FALSE	CFB	15.33333333	12	0	0	0.75533221	mRNAup	FALSE	0	CFB	276340	0.10845588
1946	4.69123506	0	0.21316348	0	1	9	FALSE	CFD	12	1	0	0	0.66443318		FALSE	0	CFD	0	0
1950	4.34539619	9.90E-07	0.23012861	0	2	7	FALSE	LAMC3	23.5	2	0	0	0.69587307		FALSE	0	LAMC3	1590	0.52325581
1952	3.97144754	1.01E-04	0.25179736	0.04761905	7	8	FALSE	C4B	11.14285714	7	0	0	0.72986841	mRNAup	FALSE	0	C4B	60672	0.16294643
1956	3.1710934	5.25E-05	0.31534864	0	7	8	FALSE	CGNL1	84.71428571	7	0	0	0.80262787	mRNAdown	FALSE	0	CGNL1	301984	0.1733215
1959	3.20329792	8.64E-05	0.31217827	0	2	8	FALSE	CHAC1	231	2	0	0	0.79970019	mRNAdown	FALSE	0	CHAC1	109438	0.50108932
1961	3.20219124	2.35E-05	0.31228616	0	2	8	FALSE	CHI3L2	232	2	0	0	0.7998008	mRNAup	FALSE	0	CHI3L2	38482	0.50217391
1962	3.91611332	1.21E-05	0.25535523	0.16666667	4	7	FALSE	ETS1	74.25	4	0	0	0.73489879		FALSE	0	ETS1	12178	0.26818182
1965	4.86985392	8.85E-04	0.20534497	0	5	10	FALSE	CHP2	1.2	5	0	0	0.6481951	mRNAdown	FALSE	0	CHP2	2060788	0.2
1966	3.87084993	0.00110619	0.2583412	0	2	9	FALSE	SLC9A5	187	2	0	0	0.73901364		FALSE	0	SLC9A5	2575960	0.5
1968	5.86974325	0	0.1703652	0	1	11	FALSE	SLC9A3	5	1	0	0	0.55729607		FALSE	0	SLC9A3	0	0
1970	5.86974325	0	0.1703652	0	1	11	FALSE	SLC9A2	5	1	0	0	0.55729607		FALSE	0	SLC9A2	0	0
1972	5.86974325	0	0.1703652	0	1	11	FALSE	SLC9A4	5	1	0	0	0.55729607		FALSE	0	SLC9A4	0	0
1974	5.86974325	0	0.1703652	0	1	11	FALSE	SLC9A1	5	1	0	0	0.55729607		FALSE	0	SLC9A1	0	0
1976	5.55787959	7.00E-04	0.17992473	0	7	9	FALSE	CHRDL2	4	7	0	0	0.58564731	mRNAup	FALSE	0	CHRDL2	2516002	0.15
1977	4.98472776	2.81E-04	0.20061276	0	4	8	FALSE	BMP5	3.5	4	0	0	0.63775202	mRNAdown	FALSE	0	BMP5	363990	0.27777778
1979	5.46956618	4.89E-05	0.18282986	0	2	9	FALSE	BMP2	5	2	0	0	0.5936758		FALSE	0	BMP2	27178	0.5
1981	6.55776892	0	0.15249089	0	1	10	FALSE	BMP7	7	1	0	0	0.49474828		FALSE	0	BMP7	0	0
1983	4.63081009	0.00195798	0.21594494	0	17	8	FALSE	INHBA	2.64705882	17	0	0	0.66992636	mRNAup	FALSE	0	INHBA	7726270	0.08235294
1985	5.75088535	2.41E-05	0.17388627	0	2	9	FALSE	BMP4	4.5	2	0	0	0.56810133		FALSE	0	BMP4	7204	0.5
1987	6.55776892	0	0.15249089	0	1	10	FALSE	GDF5	7	1	0	0	0.49474828		FALSE	0	GDF5	0	0
1989	6.55776892	0	0.15249089	0	1	10	FALSE	BMP6	7	1	0	0	0.49474828		FALSE	0	BMP6	0	0
1991	3.69588313	2.96E-04	0.27057133	0.01515152	12	8	FALSE	CHRM3	11.75	12	0	0	0.75491972	mRNAdown	FALSE	0	CHRM3	471420	0.09251412
1992	3.39431164	5.33E-04	0.29461054	0.03030303	12	7	FALSE	SET	136.6666667	12	0	0	0.78233531		FALSE	0	SET	1165516	0.09784173
1994	3.6935591	1.38E-05	0.27074157	0	2	8	FALSE	ARF1	334	2	0	0	0.75513099		FALSE	0	ARF1	31200	0.50150602
1996	4.69577247	0	0.21295751	0	1	9	FALSE	NALCN	12	1	0	0	0.66402068		FALSE	0	NALCN	0	0
1998	4.16279327	6.90E-04	0.24022332	0	7	8	FALSE	CHRNA4	6.14285714	7	0	0	0.71247334	mRNAdown	FALSE	0	CHRNA4	2368518	0.14693878
1999	5.1626826	0	0.19369775	0	1	9	FALSE	CHRNB2	7	1	0	0	0.62157431		FALSE	0	CHRNB2	0	0
2001	3.63833555	8.73E-04	0.27485096	0	10	7	FALSE	YWHAH	89	10	0	0	0.76015131		FALSE	0	YWHAH	2529432	0.10931677
2003	3.19721116	4.72E-05	0.31277259	0	5	8	FALSE	CKAP2L	100.2	5	0	0	0.80025353	mRNAup	FALSE	0	CKAP2L	108450	0.21471861
2005	5.55533422	0	0.18000717	0	1	10	FALSE	CLEC10A	2	1	0	0	0.58587871	mRNAup	FALSE	0	CLEC10A	0	0
2006	4.55544489	2.21E-04	0.21951753	0	2	9	FALSE	C4orf32	17.5	2	0	0	0.67677774		FALSE	0	C4orf32	636264	0.5
2008	4.36741921	0.00274289	0.22896817	0	25	8	FALSE	CLEC12A	1.72	25	0	0	0.69387098	mRNAup	FALSE	0	CLEC12A	7151068	0.05538462
2009	5.36730854	0	0.18631312	0	1	9	FALSE	TARSL2	25	1	0	0	0.60297195		FALSE	0	TARSL2	0	0
2011	4.06961045	1.10E-04	0.24572376	0	3	7	FALSE	DNAJC1	21.33333333	3	0	0	0.7209445		FALSE	0	DNAJC1	252938	0.33333333
2013	4.10070828	7.05E-05	0.24386031	0	2	7	FALSE	ADAMTS2	18.5	2	0	0	0.71811743		FALSE	0	ADAMTS2	214822	0.5
2015	4.08809208	6.93E-05	0.24461289	0	2	8	FALSE	STX6	34	2	0	0	0.71926436		FALSE	0	STX6	260560	0.54098361
2017	5.36730854	0	0.18631312	0	1	9	FALSE	GOSR2	25	1	0	0	0.60297195		FALSE	0	GOSR2	0	0
2019	5.36730854	0	0.18631312	0	1	9	FALSE	COLEC12	25	1	0	0	0.60297195		FALSE	0	COLEC12	0	0
2021	5.36730854	0	0.18631312	0	1	9	FALSE	IKBIP	25	1	0	0	0.60297195		FALSE	0	IKBIP	0	0
2023	3.84738822	5.11E-04	0.25991658	0	2	7	FALSE	SUN1	230.5	2	0	0	0.74114653		FALSE	0	SUN1	1331300	0.5
2025	5.36730854	0	0.18631312	0	1	9	FALSE	STX5	25	1	0	0	0.60297195		FALSE	0	STX5	0	0
2027	3.68061089	9.72E-04	0.27169403	0	3	8	FALSE	SNAP47	241.3333333	3	0	0	0.7563081		FALSE	0	SNAP47	2607738	0.33754682
2029	4.08388668	1.13E-04	0.24486478	0	2	8	FALSE	TMEM57	29.5	2	0	0	0.71964667		FALSE	0	TMEM57	221264	0.5
2031	5.36730854	0	0.18631312	0	1	9	FALSE	MESDC2	25	1	0	0	0.60297195		FALSE	0	MESDC2	0	0
2033	4.03021248	1.46E-04	0.24812588	0	3	7	FALSE	VTI1B	38.33333333	3	0	0	0.72452614		FALSE	0	VTI1B	352082	0.34890966
2035	4.00166003	2.39E-04	0.24989629	0	2	8	FALSE	XPO5	78	2	0	0	0.72712182		FALSE	0	XPO5	876010	0.5
2037	3.94333776	3.57E-04	0.25359228	0	3	8	FALSE	MAN2A2	60	3	0	0	0.73242384		FALSE	0	MAN2A2	532942	0.33333333
2039	4.08809208	6.93E-05	0.24461289	0	2	8	FALSE	VTI1A	34	2	0	0	0.71926436		FALSE	0	VTI1A	260560	0.54098361
2041	5.36730854	0	0.18631312	0	1	9	FALSE	BNIP1	25	1	0	0	0.60297195		FALSE	0	BNIP1	0	0
2043	5.36730854	0	0.18631312	0	1	9	FALSE	STX10	25	1	0	0	0.60297195		FALSE	0	STX10	0	0
2045	5.36730854	0	0.18631312	0	1	9	FALSE	GAS6	25	1	0	0	0.60297195		FALSE	0	GAS6	0	0
2047	4.08809208	6.93E-05	0.24461289	0	2	8	FALSE	STX18	34	2	0	0	0.71926436		FALSE	0	STX18	260560	0.54098361
2049	5.36730854	0	0.18631312	0	1	9	FALSE	GOSR1	25	1	0	0	0.60297195		FALSE	0	GOSR1	0	0
2051	5.36730854	0	0.18631312	0	1	9	FALSE	VAMP4	25	1	0	0	0.60297195		FALSE	0	VAMP4	0	0
2053	5.36730854	0	0.18631312	0	1	9	FALSE	SOX13	25	1	0	0	0.60297195		FALSE	0	SOX13	0	0
2055	4.08809208	6.93E-05	0.24461289	0	2	8	FALSE	STX8	34	2	0	0	0.71926436		FALSE	0	STX8	260560	0.54098361
2057	4.0750332	2.43E-04	0.24539677	0	3	7	FALSE	PBXIP1	49.66666667	3	0	0	0.72045153		FALSE	0	PBXIP1	383032	0.33796296
2059	1	0	1	0	1	1	FALSE	CLEC4D	1	1	0	0	1	mRNAup	FALSE	0	CLEC4D	0	0
2060	1	0	1	0	1	1	FALSE	CLEC6A	1	1	0	0	1		FALSE	0	CLEC6A	0	0
2062	3.15615317	0.00284945	0.3168414	0	25	8	FALSE	CLEC7A	25	25	0	0	0.80398608	mRNAup	FALSE	0	CLEC7A	2235862	0.04469274
2063	4.1560425	0	0.24061352	0	1	9	FALSE	TMEM79	25	1	0	0	0.71308705		FALSE	0	TMEM79	0	0
2065	4.1560425	0	0.24061352	0	1	9	FALSE	SMIM3	25	1	0	0	0.71308705		FALSE	0	SMIM3	0	0
2068	4.1560425	0	0.24061352	0	1	9	FALSE	Q9BRL5	25	1	0	0	0.71308705		FALSE	0	Q9BRL5	0	0
2070	3.34240815	7.00E-04	0.29918548	0.01515152	12	7	FALSE	HSPD1	149.75	12	0	0	0.7870538		FALSE	0	HSPD1	1914610	0.10151102
2072	4.1560425	0	0.24061352	0	1	9	FALSE	JAGN1	25	1	0	0	0.71308705		FALSE	0	JAGN1	0	0
2075	4.1560425	0	0.24061352	0	1	9	FALSE	ADAM33	25	1	0	0	0.71308705		FALSE	0	ADAM33	0	0
2077	3.75940682	3.17E-04	0.26599941	0.05555556	9	8	FALSE	RANBP9	42.44444444	9	0	0	0.74914483		FALSE	0	RANBP9	505402	0.12212504
2079	4.1560425	0	0.24061352	0	1	9	FALSE	Q9BU27	25	1	0	0	0.71308705		FALSE	0	Q9BU27	0	0
2081	4.10458167	0	0.24363019	0	1	9	FALSE	ABCC1	38	1	0	0	0.7177653		FALSE	0	ABCC1	0	0
2083	3.23550243	8.59E-04	0.30907101	0.01282051	13	7	FALSE	HSP90B1	157.3846154	13	0	0	0.79677251		FALSE	0	HSP90B1	2095982	0.09202731
2085	3.93359894	1.30E-05	0.25422012	0	4	7	FALSE	GDE1	32.25	4	0	0	0.73330919		FALSE	0	GDE1	23680	0.26260504
2087	4.10458167	0	0.24363019	0	1	9	FALSE	ADAM1A	38	1	0	0	0.7177653		FALSE	0	ADAM1A	0	0
2091	4.03452855	1.54E-06	0.24786043	0	2	8	FALSE	XK	27	2	0	0	0.72413377		FALSE	0	XK	1610	0.50980392
2094	4.10458167	0	0.24363019	0	1	9	FALSE	ADAM2	38	1	0	0	0.7177653		FALSE	0	ADAM2	0	0
2096	3.75664011	3.73E-05	0.26619532	0	6	8	FALSE	RAB1A	40.16666667	6	0	0	0.74939635		FALSE	0	RAB1A	47298	0.17884323
2099	4.10458167	0	0.24363019	0	1	9	FALSE	KDSR	38	1	0	0	0.7177653		FALSE	0	KDSR	0	0
2101	3.14497565	0.00195938	0.31796749	0.00336134	35	8	FALSE	CLSPN	21.37142857	35	0	0	0.80500221	mRNAup	FALSE	0	CLSPN	3069774	0.03867135
2103	4.09683488	2.29E-06	0.24409087	0	2	9	FALSE	MYH7	33.5	2	0	0	0.71846956		FALSE	0	MYH7	4854	0.51587302
2105	4.02058433	6.15E-06	0.24872007	0.33333333	3	8	FALSE	TIMELESS	34.66666667	3	0	0	0.72540142		FALSE	0	TIMELESS	7624	0.35395189
2110	4.03939796	2.26E-06	0.24756164	0	2	7	FALSE	CDC7	44.5	2	0	0	0.72369109		FALSE	0	CDC7	5504	0.51176471
2112	3.75475874	6.13E-05	0.2663287	0	5	8	FALSE	CHEK1	105.8	5	0	0	0.74956739		FALSE	0	CHEK1	154290	0.21563786
2115	3.54072598	3.27E-04	0.28242796	0.05454545	11	7	FALSE	RPA3	109.7272727	11	0	0	0.76902491		FALSE	0	RPA3	1081634	0.11314178
2117	3.80976096	1.05E-05	0.26248366	0	2	8	FALSE	LTN1	186.5	2	0	0	0.74456719		FALSE	0	LTN1	20028	0.50407609
2120	3.94654714	1.19E-05	0.25338605	0	4	7	FALSE	HERC2	26.5	4	0	0	0.73213208		FALSE	0	HERC2	26902	0.2628866
2122	4.14486498	0	0.24126238	0	1	9	FALSE	MPP1	35	1	0	0	0.71410318		FALSE	0	MPP1	0	0
2124	3.92153608	2.25E-06	0.25500212	0	2	8	FALSE	RAD9A	89.5	2	0	0	0.73440581		FALSE	0	RAD9A	9240	0.53636364
2126	3.84063745	7.49E-05	0.26037344	0.1	5	7	FALSE	LTA	62	5	0	0	0.74176023		FALSE	0	LTA	383236	0.2154386
2128	4.14486498	0	0.24126238	0	1	9	FALSE	PRIMPOL	35	1	0	0	0.71410318		FALSE	0	PRIMPOL	0	0
2130	4.03131917	6.50E-06	0.24805776	0	2	8	FALSE	GJB2	39	2	0	0	0.72442553		FALSE	0	GJB2	3794	0.5
2133	3.16179726	6.74E-04	0.31627581	0	17	6	FALSE	CMBL	35.05882353	17	0	0	0.80347298	mRNAdown	FALSE	0	CMBL	1014854	0.06852882
2134	3.95517928	1.79E-05	0.25283304	0	4	7	FALSE	SAP30	33.5	4	0	0	0.73134734		FALSE	0	SAP30	22342	0.25390625
2137	3.84285082	3.32E-05	0.26022348	0	4	7	FALSE	SMS	98.75	4	0	0	0.74155902		FALSE	0	SMS	59146	0.25522193
2139	3.68238158	1.87E-04	0.27156338	0.07142857	8	7	FALSE	SNCA	67	8	0	0	0.75614713		FALSE	0	SNCA	425734	0.15329099
2141	3.61299247	7.61E-04	0.27677888	0.03296703	14	7	FALSE	TRIP6	56.85714286	14	0	0	0.76245523		FALSE	0	TRIP6	803296	0.07785912
2143	4.42839752	1.35E-04	0.22581532	0	7	8	FALSE	CNTNAP4	3.57142857	7	0	0	0.6883275	mRNAdown	FALSE	0	CNTNAP4	184644	0.16071429
2144	4.01239486	1.20E-04	0.24922771	0	6	8	FALSE	CASK	18.33333333	6	0	0	0.72614592		FALSE	0	CASK	182844	0.17333333
2146	4.08587871	5.23E-05	0.2447454	0	3	8	FALSE	MAST3	44	3	0	0	0.71946557		FALSE	0	MAST3	53038	0.3359375
2148	4.77921647	2.82E-06	0.20923932	0	2	9	FALSE	APBA1	17.5	2	0	0	0.65643487		FALSE	0	APBA1	3146	0.53225806
2150	4.93359894	4.10E-06	0.20269179	0	2	9	FALSE	FBXO21	10	2	0	0	0.6424001		FALSE	0	FBXO21	4732	0.5
2152	3.8187251	1.37E-04	0.2618675	0	5	7	FALSE	TIAM1	52.6	5	0	0	0.74375226		FALSE	0	TIAM1	212158	0.21061224
2154	4.77921647	2.82E-06	0.20923932	0	2	9	FALSE	MACF1	17.5	2	0	0	0.65643487		FALSE	0	MACF1	3146	0.53225806
2156	4.31053564	2.36E-04	0.23198973	0	4	8	FALSE	COA6	8	4	0	0	0.69904221	mRNAdown	FALSE	0	COA6	638992	0.28
2157	3.54426737	7.96E-04	0.28214576	0.01282051	13	7	FALSE	GABARAP	82.46153846	13	0	0	0.76870297		FALSE	0	GABARAP	2184880	0.09263948
2160	3.19400177	0.00157865	0.31308686	0	16	8	FALSE	COG8	31.1875	16	0	0	0.80054529	mRNAup	FALSE	0	COG8	1176166	0.06491935
2162	4.1938911	0	0.23844205	0	1	9	FALSE	Q8IX85	16	1	0	0	0.70964626		FALSE	0	Q8IX85	0	0
2164	3.20307658	2.65E-04	0.31219984	0	3	8	FALSE	COL11A1	154.6666667	3	0	0	0.79972031	mRNAdown	FALSE	0	COL11A1	209780	0.33478577
2165	4.20296591	0	0.23792722	0	1	9	FALSE	FBXL19	3	1	0	0	0.70882128		FALSE	0	FBXL19	0	0
2168	3.19001771	3.86E-05	0.31347788	0.66666667	3	8	FALSE	COL12A1	171.6666667	3	0	0	0.80090748	mRNAup	FALSE	0	COL12A1	82696	0.33660131
2169	4.05544489	5.54E-06	0.24658207	0.33333333	3	7	FALSE	MYBPC2	51	3	0	0	0.72223228		FALSE	0	MYBPC2	14652	0.36190476
2172	3.13756087	0.00434507	0.31871892	0.00226244	52	8	FALSE	DYSF	13.48076923	52	0	0	0.80567628	mRNAup	FALSE	0	DYSF	5630606	0.02470908
2174	4.03198318	2.31E-05	0.24801691	0	3	8	FALSE	COL15A1	28.33333333	3	0	0	0.72436517	mRNAup	FALSE	0	COL15A1	34520	0.34166667
2176	4.68492696	1.36E-05	0.2134505	0	4	8	FALSE	COL23A1	3.5	4	0	0	0.66500664	mRNAup	FALSE	0	COL23A1	37646	0.27777778
2177	4.49645861	7.85E-06	0.22239724	0	2	8	FALSE	NAA38	19	2	0	0	0.68214013		FALSE	0	NAA38	19098	0.51428571
2179	4.03441788	7.00E-05	0.24786723	0	6	7	FALSE	FURIN	14.33333333	6	0	0	0.72414383		FALSE	0	FURIN	130894	0.17094017
2181	4.02324037	9.75E-04	0.24855587	0	13	8	FALSE	COLEC11	6	13	0	0	0.72515997	mRNAup	FALSE	0	COLEC11	3243428	0.0877193
2182	3.72166888	2.23E-04	0.26869666	0	5	8	FALSE	KLHDC2	128.4	5	0	0	0.75257556		FALSE	0	KLHDC2	657932	0.20953947
2186	3.67651616	1.23E-04	0.27199663	0	5	7	FALSE	RPL23	97.8	5	0	0	0.75668035		FALSE	0	RPL23	431504	0.22511628
2188	5.0231297	0	0.19907907	0	1	9	FALSE	NELL2	13	1	0	0	0.63426094		FALSE	0	NELL2	0	0
2190	4.31750775	3.37E-05	0.2316151	0	4	9	FALSE	TRIM68	16.75	4	0	0	0.69840839		FALSE	0	TRIM68	51590	0.25403226
2192	4.8292386	5.27E-06	0.20707198	0	2	9	FALSE	COLGALT2	15.5	2	0	0	0.6518874		FALSE	0	COLGALT2	4240	0.5
2194	5.0231297	0	0.19907907	0	1	9	FALSE	COL6A1	13	1	0	0	0.63426094		FALSE	0	COL6A1	0	0
2198	4.65050907	8.37E-06	0.21503022	0	2	9	FALSE	MTFR1	12	2	0	0	0.66813554		FALSE	0	MTFR1	4376	0.5
2200	3.68503763	1.25E-04	0.27136765	0	3	8	FALSE	ASB7	226.3333333	3	0	0	0.75590567		FALSE	0	ASB7	401734	0.33382716
2203	3.14088092	0.00364803	0.31838202	0	40	8	FALSE	CPVL	18.65	40	0	0	0.80537446	mRNAup	FALSE	0	CPVL	4267616	0.03274583
2204	4.14077025	0	0.24150096	0	1	9	FALSE	NT5C3A	40	1	0	0	0.71447543		FALSE	0	NT5C3A	0	0
2206	3.54316069	1.28E-04	0.28223388	0	7	7	FALSE	MAP3K3	92.28571429	7	0	0	0.76880357		FALSE	0	MAP3K3	260520	0.15445975
2209	3.92164675	8.56E-05	0.25499492	0	4	7	FALSE	CYB5R3	52.75	4	0	0	0.73439575		FALSE	0	CYB5R3	80338	0.25492611
2213	3.96569278	2.90E-05	0.25216275	0	2	8	FALSE	MANEA	74.5	2	0	0	0.73039157		FALSE	0	MANEA	14076	0.5
2215	3.79703409	5.62E-05	0.26336345	0.14285714	7	7	FALSE	STK25	44.28571429	7	0	0	0.74572417		FALSE	0	STK25	91220	0.17670683
2217	3.68625498	4.72E-05	0.27127803	0	2	8	FALSE	OCIAD1	348	2	0	0	0.755795		FALSE	0	OCIAD1	45980	0.5007215
2219	4.14077025	0	0.24150096	0	1	9	FALSE	NAT14	40	1	0	0	0.71447543		FALSE	0	NAT14	0	0
2221	3.90980522	1.21E-05	0.25576722	0	3	7	FALSE	QSOX2	59	3	0	0	0.73547225		FALSE	0	QSOX2	22820	0.34117647
2223	3.60756972	0.00268621	0.27719492	0.00356506	34	8	FALSE	TMEM177	7.5	34	0	0	0.76294821	mRNAdown	FALSE	0	TMEM177	2201486	0.03344282
2225	3.83576804	2.01E-05	0.26070398	0	2	8	FALSE	FAM162A	167	2	0	0	0.74220291		FALSE	0	FAM162A	27944	0.5030303
2227	4.12029659	8.59E-06	0.24270097	0	2	9	FALSE	MICU1	26.5	2	0	0	0.71633667		FALSE	0	MICU1	25490	0.5
2229	4.23959717	1.00E-05	0.23587147	0	3	8	FALSE	CRABP1	11.66666667	3	0	0	0.70549117	mRNAdown	FALSE	0	CRABP1	16384	0.35555556
2230	3.61498451	2.16E-04	0.27662636	0.07142857	8	7	FALSE	TRA2A	104.75	8	0	0	0.76227414		FALSE	0	TRA2A	503482	0.15178571
2232	4.10524568	6.35E-06	0.24359078	0	3	9	FALSE	MPP3	17	3	0	0	0.71770494		FALSE	0	MPP3	14578	0.33333333
2234	3.17596282	4.83E-04	0.31486515	0	10	8	FALSE	CRABP2	58	10	0	0	0.8021852	mRNAdown	FALSE	0	CRABP2	710058	0.11924686
2236	3.28829128	0.00131785	0.30410931	0.04575163	18	7	FALSE	UBE2I	129.1111111	18	0	0	0.79197352		FALSE	0	UBE2I	3315426	0.07245696
2238	3.91578132	4.17E-04	0.25537688	0	9	8	FALSE	CCDC155	21.11111111	9	0	0	0.73492897		FALSE	0	CCDC155	853618	0.1155811
2240	4.0084108	3.52E-06	0.24947543	0	3	7	FALSE	CCND3	26.33333333	3	0	0	0.72650811		FALSE	0	CCND3	5952	0.34703196
2242	3.52877379	8.33E-05	0.28338456	0.16363636	11	7	FALSE	CSF2RA	46	11	0	0	0.77011147	mRNAup	FALSE	0	CSF2RA	108264	0.11352329
2245	2.9477645	0.00714738	0.33924013	0.04717531	102	7	FALSE	KIT	29.1372549	102	0	0	0.8229305	mRNAdown	FALSE	0	KIT	8632032	0.02075128
2247	3.43481629	6.40E-04	0.29113639	0.08571429	15	7	FALSE	IKBKB	102.8666667	15	0	0	0.77865306		FALSE	0	IKBKB	1175488	0.08661595
2250	2.99690128	0.00120953	0.33367799	0.11740891	39	7	FALSE	CSF2RB	52.1025641	39	0	0	0.81846352	mRNAup	FALSE	0	CSF2RB	1963342	0.04313225
2253	3.95761399	7.10E-07	0.2526775	0.33333333	4	8	FALSE	CSF2	23.5	4	0	0	0.731126		FALSE	0	CSF2	900	0.34701493
2256	3.02191235	0.00123081	0.33091628	0.11666667	25	7	FALSE	CSF3R	63.48	25	0	0	0.81618979	mRNAup	FALSE	0	CSF3R	1118500	0.06104449
2257	3.02512174	0.00169443	0.33056521	0.06291591	58	7	FALSE	INPP5D	31.55172414	58	0	0	0.81589802	mRNAup	FALSE	0	INPP5D	3097084	0.03204993
2260	3.96724214	3.83E-06	0.25206427	0	2	8	FALSE	LAMC2	35.5	2	0	0	0.73025071		FALSE	0	LAMC2	4444	0.5
2262	4.02180168	0	0.24864478	0	1	8	FALSE	WSB1	25	1	0	0	0.72529076		FALSE	0	WSB1	0	0
2264	3.66168659	1.16E-04	0.2730982	0	10	8	FALSE	FBXW7	68.3	10	0	0	0.75802849		FALSE	0	FBXW7	343736	0.12169982
2266	3.8313413	5.16E-06	0.2610052	0	2	8	FALSE	WSB2	163	2	0	0	0.74260534		FALSE	0	WSB2	6796	0.5046729
2268	3.51582559	0.00127664	0.28442822	0.004329	22	7	FALSE	GSK3B	46.90909091	22	0	0	0.77128858		FALSE	0	GSK3B	3802054	0.05609756
2271	4.02180168	0	0.24864478	0	1	8	FALSE	PLA2G1B	25	1	0	0	0.72529076		FALSE	0	PLA2G1B	0	0
2273	3.72819832	1.95E-04	0.26822607	0	10	7	FALSE	FZR1	44.2	10	0	0	0.75198197		FALSE	0	FZR1	351450	0.1119171
2275	3.04515272	0.00903747	0.32839075	0.03298246	76	7	FALSE	GRB2	58.90789474	76	0	0	0.81407703		FALSE	0	GRB2	18431962	0.02295666
2277	3.88866755	2.76E-06	0.25715749	0.2	5	8	FALSE	CISH	46.4	5	0	0	0.73739386		FALSE	0	CISH	6466	0.2804878
2279	4.03320053	1.75E-05	0.24794205	0	6	8	FALSE	CTNNA3	7.5	6	0	0	0.7242545	mRNAdown	FALSE	0	CTNNA3	27432	0.18571429
2280	3.59373617	2.06E-04	0.27826194	0.14285714	8	8	FALSE	JUP	128.25	8	0	0	0.7642058		FALSE	0	JUP	472454	0.13530655
2282	3.55765826	2.62E-04	0.28108377	0	5	8	FALSE	CTNNA1	219.2	5	0	0	0.76748561		FALSE	0	CTNNA1	811348	0.21841842
2285	3.89663568	2.12E-05	0.25663164	0	4	8	FALSE	EPS8	30.25	4	0	0	0.73666948		FALSE	0	EPS8	31856	0.25884956
2287	4.19012838	2.89E-04	0.23865617	0	10	8	FALSE	CTSS	6.9	10	0	0	0.70998833	mRNAup	FALSE	0	CTSS	623432	0.10535714
2288	3.94964586	2.21E-05	0.25318726	0	3	7	FALSE	BGLAP	29.66666667	3	0	0	0.73185038		FALSE	0	BGLAP	59268	0.3495935
2290	3.94378043	1.73E-04	0.25356381	0	13	8	FALSE	SLPI	7	13	0	0	0.7323836	mRNAup	FALSE	0	SLPI	143964	0.08571429
2292	3.72576361	1.00E-04	0.26840135	0	5	7	FALSE	OCLN	73.2	5	0	0	0.75220331		FALSE	0	OCLN	203374	0.20687679
2294	3.81927844	2.23E-04	0.26182956	0.01282051	13	8	FALSE	CXCL1	15.07692308	13	0	0	0.74370196	mRNAup	FALSE	0	CXCL1	266624	0.09882479
2295	3.63512616	8.91E-04	0.27509362	0.07246377	24	8	FALSE	CXCR1	10.375	24	0	0	0.76044308	mRNAup	FALSE	0	CXCR1	1027972	0.05747126
2298	3.47521027	0.00172183	0.28775237	0.03030303	33	8	FALSE	CXCR2	10.12121212	33	0	0	0.77498088	mRNAup	FALSE	0	CXCR2	1348804	0.04280473
2302	4.33621071	1.41E-06	0.2306161	0.33333333	3	9	FALSE	CXCL3	22	3	0	0	0.69670812	mRNAup	FALSE	0	CXCL3	2232	0.47101449
2304	5.10325365	0	0.19595342	0	1	10	FALSE	CXorf21	2	1	0	0	0.62697694	mRNAup	FALSE	0	CXorf21	0	0
2305	4.10336432	2.21E-04	0.24370247	0	2	9	FALSE	SLC15A4	27.5	2	0	0	0.71787597		FALSE	0	SLC15A4	173396	0.5
2307	3.19023904	6.65E-04	0.31345613	0	10	8	FALSE	CYTIP	49.9	10	0	0	0.80088736	mRNAup	FALSE	0	CYTIP	761346	0.10448718
2308	3.77368305	1.86E-05	0.26499311	0	3	8	FALSE	CYTH1	147	3	0	0	0.747847		FALSE	0	CYTH1	41150	0.34032634
2310	4.19012838	0	0.23865617	0	1	9	FALSE	CYTH3	10	1	0	0	0.70998833		FALSE	0	CYTH3	0	0
2313	3.69223108	6.99E-05	0.27083895	0.15555556	10	7	FALSE	SOCS1	56.7	10	0	0	0.75525172		FALSE	0	SOCS1	124208	0.14547804
2315	4.19012838	0	0.23865617	0	1	9	FALSE	EDEM2	10	1	0	0	0.70998833		FALSE	0	EDEM2	0	0
2318	3.66434263	5.15E-05	0.27290024	0	4	8	FALSE	CYTH2	184.25	4	0	0	0.75778703		FALSE	0	CYTH2	181514	0.26948529
2320	3.91456397	1.26E-05	0.25545629	0.2	5	7	FALSE	HBB	27	5	0	0	0.73503964		FALSE	0	HBB	23514	0.21626016
2322	3.19422311	0.00139819	0.31306517	0	12	8	FALSE	DAZ1	41.08333333	12	0	0	0.80052517	mRNAup	FALSE	0	DAZ1	1208108	0.08620072
2323	4.19411244	0	0.23842947	0	1	9	FALSE	QK3	12	1	0	0	0.70962614		FALSE	0	QK3	0	0
2325	4.19411244	0	0.23842947	0	1	9	FALSE	DAZL	12	1	0	0	0.70962614		FALSE	0	DAZL	0	0
2328	4.19411244	0	0.23842947	0	1	9	FALSE	BOLL	12	1	0	0	0.70962614		FALSE	0	BOLL	0	0
2330	4.1938911	1.10E-07	0.23844205	0	2	9	FALSE	PUM2	7	2	0	0	0.70964626		FALSE	0	PUM2	44	0.54545455
2332	4.13689686	5.10E-07	0.24172708	0	2	9	FALSE	DAZAP2	11.5	2	0	0	0.71482756		FALSE	0	DAZAP2	1800	0.525
2334	3.91854803	7.97E-06	0.25519657	0	3	8	FALSE	DZIP3	49.66666667	3	0	0	0.73467745		FALSE	0	DZIP3	17812	0.342723
2336	4.19411244	0	0.23842947	0	1	9	FALSE	DZIP1L	12	1	0	0	0.70962614		FALSE	0	DZIP1L	0	0
2338	3.85037627	2.34E-04	0.25971488	0	7	8	FALSE	QKI	48.71428571	7	0	0	0.74087488		FALSE	0	QKI	554044	0.14726631
2342	3.20329792	1.06E-04	0.31217827	0	2	8	FALSE	DAZ3	231	2	0	0	0.79970019	mRNAup	FALSE	0	DAZ3	140236	0.50108932
2347	3.99048251	3.20E-07	0.25059626	0	2	8	FALSE	BATF2	35.5	2	0	0	0.72813795		FALSE	0	BATF2	368	0.5390625
2351	3.6851483	1.25E-04	0.2713595	0.26666667	10	7	FALSE	DDIT3	67.1	10	0	0	0.75589561		FALSE	0	DDIT3	392004	0.12767176
2356	3.12804338	0.00151141	0.31968866	0.00653595	18	6	FALSE	DCXR	40.27777778	18	0	0	0.80654151	mRNAdown	FALSE	0	DCXR	1825514	0.06922476
2357	3.72100487	3.07E-05	0.26874461	0	4	7	FALSE	GOT1	124.5	4	0	0	0.75263592		FALSE	0	GOT1	57990	0.26054852
2359	4.12793271	0	0.24225201	0	1	7	FALSE	CAB39L	18	1	0	0	0.71564248		FALSE	0	CAB39L	0	0
2364	4.06739708	8.20E-06	0.24585748	0	2	7	FALSE	CAB39	40.5	2	0	0	0.72114572		FALSE	0	CAB39	10454	0.50641026
2367	4.45728198	2.54E-06	0.22435197	0	2	8	FALSE	DEFA1B	12.5	2	0	0	0.68570164	mRNAup	FALSE	0	DEFA1B	4786	0.5
2368	3.88899956	2.54E-04	0.25713554	0	3	8	FALSE	PFDN1	101.3333333	3	0	0	0.73736368		FALSE	0	PFDN1	500148	0.33333333
2371	3.04825144	9.80E-04	0.32805693	0.05833333	16	7	FALSE	DHFR	84.875	16	0	0	0.81379532	mRNAup	FALSE	0	DHFR	857442	0.07273707
2372	3.86321381	9.13E-05	0.25885184	0	3	8	FALSE	GKAP1	64.66666667	3	0	0	0.73970784		FALSE	0	GKAP1	227080	0.34229391
2377	4.04814077	0	0.24702698	0	1	8	FALSE	ASGR1	16	1	0	0	0.72289629		FALSE	0	ASGR1	0	0
2380	3.13800354	0.00110526	0.31867396	0.00395257	23	8	FALSE	DHRS2	30.69565217	23	0	0	0.80563604	mRNAdown	FALSE	0	DHRS2	1473842	0.05566843
2381	3.23273572	0.00259139	0.30933552	0.01218162	43	7	FALSE	HBA2	22.88372093	43	0	0	0.79702403	mRNAup	FALSE	0	HBA2	2766216	0.03008465
2383	3.36409916	8.73E-04	0.2972564	0.00526316	20	7	FALSE	HNRNPA1	87.65	20	0	0	0.78508189		FALSE	0	HNRNPA1	1990974	0.06667948
2388	3.99845064	4.30E-07	0.25009687	0	2	8	FALSE	ZHX2	31	2	0	0	0.72741358		FALSE	0	ZHX2	1108	0.51724138
2391	3.39508632	2.73E-04	0.29454332	0.10714286	8	7	FALSE	RPS3A	235.75	8	0	0	0.78226488		FALSE	0	RPS3A	1104588	0.16014295
2393	3.66744135	6.35E-05	0.27266966	0	6	7	FALSE	VDAC2	96.83333333	6	0	0	0.75750533		FALSE	0	VDAC2	141108	0.17846058
2395	3.17297477	0.00158346	0.31516166	0.03557312	23	7	FALSE	ACTB	121	23	0	0	0.80245684		FALSE	0	ACTB	4514336	0.06106349
2397	3.49169987	6.25E-04	0.28639346	0.02564103	13	7	FALSE	VDAC1	97.76923077	13	0	0	0.77348183		FALSE	0	VDAC1	1290054	0.09047244
2399	3.68238158	7.40E-05	0.27156338	0.16666667	4	8	FALSE	EEF1B2	191	4	0	0	0.75614713		FALSE	0	EEF1B2	159336	0.27021277
2402	3.9249668	1.13E-04	0.25477923	0	5	8	FALSE	EXOSC5	40.6	5	0	0	0.73409393		FALSE	0	EXOSC5	208564	0.20518135
2405	4.54305002	0.00155177	0.22011644	0	10	8	FALSE	DHRS9	2	10	0	0	0.67790454	mRNAup	FALSE	0	DHRS9	4183502	0.1
2406	3.82779991	0.00145948	0.26124668	0	7	7	FALSE	ATP2B2	61.85714286	7	0	0	0.74292728		FALSE	0	ATP2B2	4001106	0.14807091
2408	5.54293935	0	0.1804097	0	1	9	FALSE	NAGLT1	10	1	0	0	0.58700551		FALSE	0	NAGLT1	0	0
2410	5.54293935	0	0.1804097	0	1	9	FALSE	CHIC2	10	1	0	0	0.58700551		FALSE	0	CHIC2	0	0
2412	5.54293935	0	0.1804097	0	1	9	FALSE	GALNT11	10	1	0	0	0.58700551		FALSE	0	GALNT11	0	0
2414	5.54293935	0	0.1804097	0	1	9	FALSE	EMB	10	1	0	0	0.58700551		FALSE	0	EMB	0	0
2416	3.77965914	5.98E-04	0.26457412	0	3	7	FALSE	TTYH3	95.66666667	3	0	0	0.74730371		FALSE	0	TTYH3	1219640	0.3356974
2418	5.54293935	0	0.1804097	0	1	9	FALSE	SLC2A8	10	1	0	0	0.58700551		FALSE	0	SLC2A8	0	0
2420	5.54293935	0	0.1804097	0	1	9	FALSE	KIAA1919	10	1	0	0	0.58700551		FALSE	0	KIAA1919	0	0
2423	5.54293935	0	0.1804097	0	1	9	FALSE	C1orf85	10	1	0	0	0.58700551		FALSE	0	C1orf85	0	0
2425	3.12782205	0.00165538	0.31971128	0.03908046	30	8	FALSE	DLGAP1	32	30	0	0	0.80656163	mRNAup	FALSE	0	DLGAP1	2619060	0.05461361
2426	4.12771138	0	0.242265	0	1	9	FALSE	SHANK2	30	1	0	0	0.7156626		FALSE	0	SHANK2	0	0
2428	3.85635237	2.62E-05	0.2593124	0.13333333	6	8	FALSE	DLG1	43.83333333	6	0	0	0.7403316		FALSE	0	DLG1	41240	0.1969697
2430	4.08300133	2.43E-06	0.24491787	0	2	7	FALSE	DYNLL2	20.5	2	0	0	0.71972715		FALSE	0	DYNLL2	9980	0.5
2432	4.05998229	2.17E-06	0.24630649	0	2	9	FALSE	GRIN2C	32.5	2	0	0	0.72181979		FALSE	0	GRIN2C	4972	0.50806452
2434	3.75719345	5.69E-05	0.26615611	0.1	5	7	FALSE	MYO5A	88	5	0	0	0.74934605		FALSE	0	MYO5A	81858	0.26167665
2437	4.10867641	0	0.24338738	1	2	9	FALSE	DLGAP2	27.5	2	0	0	0.71739305		FALSE	0	DLGAP2	0	0.63953488
2439	4.01759628	3.27E-06	0.24890505	0.33333333	3	8	FALSE	SHANK1	37.33333333	3	0	0	0.72567307		FALSE	0	SHANK1	8476	0.38947368
2441	3.68448429	3.23E-04	0.2714084	0.04444444	10	7	FALSE	DLG4	48.9	10	0	0	0.75595597		FALSE	0	DLG4	562418	0.11341176
2443	3.53021248	0.00134449	0.28326907	0.04347826	24	8	FALSE	KCNA4	14.25	24	0	0	0.76998068	mRNAdown	FALSE	0	KCNA4	1081220	0.05263995
2447	3.10723772	5.91E-04	0.32182926	0	16	6	FALSE	DLGAP5	52.875	16	0	0	0.80843293	mRNAup	FALSE	0	DLGAP5	1698106	0.09037456
2451	4.10712705	0	0.2434792	0	1	7	FALSE	H7C5Q0	16	1	0	0	0.7175339		FALSE	0	H7C5Q0	0	0
2454	3.31629039	3.43E-04	0.30154175	0.05454545	11	7	FALSE	KPNB1	180.5454546	11	0	0	0.78942815		FALSE	0	KPNB1	1325006	0.11428571
2457	3.54127933	7.47E-04	0.28238382	0	18	7	FALSE	BTRC	57.61111111	18	0	0	0.76897461		FALSE	0	BTRC	2088484	0.0635366
2459	3.73970784	3.19E-04	0.26740057	0	13	7	FALSE	MTUS2	37	13	0	0	0.75093565		FALSE	0	MTUS2	723296	0.1037464
2461	3.63656485	4.45E-04	0.27498478	0	14	7	FALSE	AURKA	39.07142857	14	0	0	0.76031229		FALSE	0	AURKA	1103792	0.07849779
2463	4.62605135	5.12E-06	0.21616708	0	3	8	FALSE	DLX1	6	3	0	0	0.67035897	mRNAdown	FALSE	0	DLX1	5308	0.33333333
2464	3.78098716	4.24E-04	0.26448119	0.01098901	14	7	FALSE	SMAD4	26.64285714	14	0	0	0.74718299		FALSE	0	SMAD4	966790	0.08238247
2466	3.88069942	5.20E-05	0.25768551	0	2	7	FALSE	FOXA1	37	2	0	0	0.73811823		FALSE	0	FOXA1	69084	0.5
2468	3.46414343	1.42E-04	0.28867165	0	15	8	FALSE	DLX4	30.13333333	15	0	0	0.77598696	mRNAdown	FALSE	0	DLX4	581276	0.12503577
2469	3.50564409	0.0010067	0.28525429	0.13793103	30	7	FALSE	PLCG1	57.53333333	30	0	0	0.77221417		FALSE	0	PLCG1	2514636	0.06006289
2471	3.62970341	1.31E-05	0.2755046	0.33333333	3	7	FALSE	MAGED1	292	3	0	0	0.76093605		FALSE	0	MAGED1	33128	0.34394654
2474	3.54924745	5.65E-04	0.28174987	0.01666667	16	7	FALSE	SMAD2	57.875	16	0	0	0.76825023		FALSE	0	SMAD2	1529506	0.07410714
2478	3.90294378	2.08E-05	0.25621686	0	3	7	FALSE	LSM3	61.66666667	3	0	0	0.73609602		FALSE	0	LSM3	66564	0.33333333
2482	3.51106684	4.98E-04	0.28481372	0.01515152	12	7	FALSE	SP1	87.08333333	12	0	0	0.7717212		FALSE	0	SP1	1033664	0.09385201
2485	3.56772908	5.49E-04	0.28029034	0.05026455	28	7	FALSE	NCK1	47.14285714	28	0	0	0.76657008		FALSE	0	NCK1	2474834	0.05652963
2487	3.35690571	0.00148964	0.29789338	0.00689655	30	7	FALSE	CRK	61.66666667	30	0	0	0.78573584		FALSE	0	CRK	3251782	0.04301531
2489	3.41135458	0.00114012	0.29313869	0.05026455	28	7	FALSE	ABL1	65.21428571	28	0	0	0.78078595		FALSE	0	ABL1	3026230	0.05149568
2491	3.92452413	5.13E-06	0.25480796	0	4	8	FALSE	DMRTA1	24.25	4	0	0	0.73413417	mRNAup	FALSE	0	DMRTA1	17992	0.40789474
2492	3.53375387	3.08E-04	0.28298519	0.12380952	15	7	FALSE	STAT5B	80.4	15	0	0	0.76965874		FALSE	0	STAT5B	688384	0.08874123
2494	3.69665781	8.06E-05	0.27051462	0	3	8	FALSE	ORC5	223	3	0	0	0.75484929		FALSE	0	ORC5	176026	0.33433735
2496	3.00907481	0.00544857	0.33232806	0.01393728	42	7	FALSE	HSP90AB1	96.47619048	42	0	0	0.81735684		FALSE	0	HSP90AB1	13044196	0.03606364
2498	3.0603143	0.0017862	0.32676382	0.04354354	37	7	FALSE	DOK2	35.59459459	37	0	0	0.8126987	mRNAup	FALSE	0	DOK2	2145406	0.04274885
2501	3.59307216	5.14E-05	0.27831336	0	4	8	FALSE	DNAJB11	170.5	4	0	0	0.76426617		FALSE	0	DNAJB11	143094	0.2623839
2503	3.07990261	0.00156511	0.32468559	0.03218391	30	6	FALSE	TEK	38.53333333	30	0	0	0.81091794	mRNAup	FALSE	0	TEK	2466584	0.05416072
2506	4.01106684	9.24E-06	0.24931023	0	3	8	FALSE	RET	30.33333333	3	0	0	0.72626665		FALSE	0	RET	7474	0.34108527
2510	3.6584772	1.76E-05	0.27333777	0	2	8	FALSE	KIAA1279	346.5	2	0	0	0.75832025		FALSE	0	KIAA1279	25670	0.50145138
2512	3.61310314	1.01E-04	0.2767704	0	4	7	FALSE	HSPA4L	214.75	4	0	0	0.76244517		FALSE	0	HSPA4L	281456	0.26130807
2514	3.76328021	2.31E-05	0.26572563	0.5	4	7	FALSE	DOK3	92.25	4	0	0	0.74879271		FALSE	0	DOK3	30958	0.28220859
2518	3.9607127	1.49E-05	0.25247981	0	4	8	FALSE	RAB10	22.75	4	0	0	0.7308443		FALSE	0	RAB10	8630	0.26851852
2520	3.03242585	0.00154237	0.32976899	0.05533597	23	8	FALSE	DPH1	67.52173913	23	0	0	0.81523401	mRNAdown	FALSE	0	DPH1	1757888	0.0518511
2527	3.57934927	0.00271491	0.27938039	0.02822581	32	8	FALSE	DPP4	11.46875	32	0	0	0.7655137	mRNAup	FALSE	0	DPP4	2264838	0.03962862
2528	2.92784418	0.00535812	0.34154823	0.03365385	65	7	FALSE	CXCR4	37.16923077	65	0	0	0.82474144	mRNAup	FALSE	0	CXCR4	5700458	0.0228005
2531	4.40659584	6.96E-04	0.22693254	0	9	8	FALSE	CXCL9	9.33333333	9	0	0	0.69030947	mRNAup	FALSE	0	CXCL9	1125618	0.13227513
2534	3.14486498	0.00198611	0.31797867	0.004329	22	8	FALSE	ADA	32.40909091	22	0	0	0.80501227	mRNAup	FALSE	0	ADA	2661986	0.05844156
2536	4.38545817	6.83E-06	0.22802635	0	3	8	FALSE	CCL3L1	28	3	0	0	0.69223108		FALSE	0	CCL3L1	6206	0.40909091
2539	3.76007083	9.54E-05	0.26595244	0	7	7	FALSE	BCL10	46.85714286	7	0	0	0.74908447		FALSE	0	BCL10	122188	0.15544794
2543	4.17087207	6.04E-05	0.23975801	0	6	8	FALSE	CXCL11	17	6	0	0	0.7117389	mRNAup	FALSE	0	CXCL11	77972	0.19512195
2545	3.85856574	7.75E-05	0.25916366	0.1	5	8	FALSE	CXCL12	33.2	5	0	0	0.74013039		FALSE	0	CXCL12	73482	0.21168831
2547	4.12682603	3.17E-04	0.24231698	0.03571429	8	8	FALSE	CCL22	10.25	8	0	0	0.71574309	mRNAup	FALSE	0	CCL22	549590	0.13571429
2550	3.16367862	0.00312983	0.31608773	0.00215054	31	8	FALSE	DPP9	20.67741935	31	0	0	0.80330194	mRNAup	FALSE	0	DPP9	3144900	0.03848331
2552	3.45241257	3.47E-04	0.28965252	0.07142857	8	8	FALSE	NPLOC4	207.25	8	0	0	0.7770534		FALSE	0	NPLOC4	1096010	0.14704836
2554	4.04305002	9.02E-06	0.24733802	0	2	9	FALSE	NIF3L1	62.5	2	0	0	0.72335909		FALSE	0	NIF3L1	9014	0.50826446
2556	3.77954847	2.46E-05	0.26458187	0	3	7	FALSE	TP53RK	104	3	0	0	0.74731378		FALSE	0	TP53RK	55538	0.34680135
2558	3.24026118	0.00190103	0.3086171	0.02105263	20	7	FALSE	CSNK2A2	112.35	20	0	0	0.79633989		FALSE	0	CSNK2A2	3843000	0.06313559
2561	4.16356795	0	0.24017862	0	1	9	FALSE	LPP	31	1	0	0	0.71240291		FALSE	0	LPP	0	0
2563	4.06938911	3.86E-06	0.24573713	0	2	8	FALSE	GRIA2	30.5	2	0	0	0.72096463		FALSE	0	GRIA2	4430	0.50862069
2565	4.12771138	3.95E-05	0.242265	0	3	9	FALSE	TOM1L1	15.66666667	3	0	0	0.7156626		FALSE	0	TOM1L1	78992	0.34108527
2567	4.04869411	4.26E-06	0.24699322	0	2	8	FALSE	RPRD1B	40	2	0	0	0.72284599		FALSE	0	RPRD1B	5344	0.50649351
2569	3.979305	2.82E-05	0.25130016	0	2	8	FALSE	SURF2	70	2	0	0	0.72915409		FALSE	0	SURF2	12170	0.5
2571	4.08742807	2.29E-06	0.24465262	0	2	9	FALSE	SAE1	25	2	0	0	0.71932472		FALSE	0	SAE1	2916	0.5
2573	3.02224436	0.00909339	0.33087993	0.0043871	125	8	FALSE	DSP	14.552	125	0	0	0.8161596	mRNAup	FALSE	0	DSP	18943706	0.01770844
2575	3.521027	4.69E-04	0.28400805	0.04444444	10	7	FALSE	VTN	95.7	10	0	0	0.77081573		FALSE	0	VTN	601044	0.1197733
2577	3.64984506	6.25E-05	0.27398423	0	5	7	FALSE	RELB	162.6	5	0	0	0.75910499		FALSE	0	RELB	271706	0.22954545
2580	3.93824701	3.38E-06	0.25392008	0	2	8	FALSE	GH1	86	2	0	0	0.73288664		FALSE	0	GH1	9224	0.50595238
2582	4.02213369	0	0.24862426	0	1	9	FALSE	C9JRY4	125	1	0	0	0.72526057		FALSE	0	C9JRY4	0	0
2586	3.88590084	4.82E-06	0.25734059	0	2	7	FALSE	RAB5B	96	2	0	0	0.73764538		FALSE	0	RAB5B	15330	0.51912568
2588	3.63556884	4.22E-05	0.27506012	0.33333333	3	8	FALSE	DSC1	272.3333333	3	0	0	0.76040283		FALSE	0	DSC1	88884	0.34474018
2591	3.56518371	2.50E-04	0.28049045	0.04761905	7	7	FALSE	KRT5	144.5714286	7	0	0	0.76680148		FALSE	0	KRT5	675626	0.16440816
2593	4.02213369	0	0.24862426	0	1	9	FALSE	HNMT	125	1	0	0	0.72526057		FALSE	0	HNMT	0	0
2595	3.82392652	4.83E-05	0.2615113	0.16666667	4	7	FALSE	PKP4	65.75	4	0	0	0.74327941		FALSE	0	PKP4	156110	0.26204819
2597	3.82802125	2.49E-05	0.26123157	0.33333333	3	8	FALSE	SEC16A	96.66666667	3	0	0	0.74290716		FALSE	0	SEC16A	35758	0.35286935
2599	3.56263834	1.43E-04	0.28069085	0.06666667	6	7	FALSE	NFKB2	166.3333333	6	0	0	0.76703288		FALSE	0	NFKB2	295996	0.17756342
2601	3.62660469	2.01E-04	0.27574001	0.03571429	8	7	FALSE	KRT18	97.25	8	0	0	0.76121776		FALSE	0	KRT18	474722	0.14275148
2603	3.73804781	3.47E-04	0.26751932	0	7	7	FALSE	CENPA	47.71428571	7	0	0	0.75108656		FALSE	0	CENPA	642452	0.15835351
2605	4.02213369	0	0.24862426	0	1	9	FALSE	AK2	125	1	0	0	0.72526057		FALSE	0	AK2	0	0
2607	4.00520142	0	0.24967533	1	2	9	FALSE	IVL	77.5	2	0	0	0.72679987		FALSE	0	IVL	0	0.53819444
2609	3.87704737	5.69E-05	0.25792824	0	3	8	FALSE	KRT6A	136.6666667	3	0	0	0.73845024		FALSE	0	KRT6A	116128	0.34433164
2611	3.55455954	4.17E-04	0.28132881	0	11	8	FALSE	SSSCA1	80.81818182	11	0	0	0.76776731		FALSE	0	SSSCA1	618726	0.09939998
2613	3.86088977	5.57E-05	0.25900765	0	4	7	FALSE	ENO3	88	4	0	0	0.73991911		FALSE	0	ENO3	107454	0.26283988
2615	3.94289509	6.76E-06	0.25362075	0	2	7	FALSE	TECR	93.5	2	0	0	0.73246408		FALSE	0	TECR	18642	0.50546448
2617	3.76792829	1.31E-05	0.26539783	0	4	7	FALSE	FOXE1	64	4	0	0	0.74837016		FALSE	0	FOXE1	38634	0.27272727
2619	4.02213369	0	0.24862426	0	1	9	FALSE	OVCA2	125	1	0	0	0.72526057		FALSE	0	OVCA2	0	0
2621	3.76372289	1.46E-05	0.26569438	0	2	8	FALSE	AKR1B1	231.5	2	0	0	0.74875246		FALSE	0	AKR1B1	37976	0.50995575
2624	3.9519699	7.17E-06	0.25303836	0	2	8	FALSE	KRT16	106	2	0	0	0.7316391		FALSE	0	KRT16	18138	0.51980198
2626	3.62206729	1.02E-04	0.27608543	0.04761905	7	7	FALSE	IKBKE	93.14285714	7	0	0	0.76163025		FALSE	0	IKBKE	245724	0.16446365
2630	3.84119079	5.21E-05	0.26033594	0.06666667	6	8	FALSE	PSTPIP1	53.83333333	6	0	0	0.74170993		FALSE	0	PSTPIP1	106622	0.17841163
2633	3.1731961	1.84E-05	0.31513968	0	4	8	FALSE	DUSP5	145.75	4	0	0	0.80243672	mRNAup	FALSE	0	DUSP5	193056	0.29242424
2636	3.63933156	5.99E-04	0.27477573	0	16	8	FALSE	EAF2	15.25	16	0	0	0.76006077	mRNAup	FALSE	0	EAF2	445314	0.0656682
2637	3.52346171	1.04E-04	0.2838118	0.16666667	4	8	FALSE	PSME3	326.5	4	0	0	0.77059439		FALSE	0	PSME3	339872	0.27958834
2639	4.02113767	2.57E-06	0.24868584	0	2	7	FALSE	TFPT	37.5	2	0	0	0.72535112		FALSE	0	TFPT	2318	0.50694444
2641	3.48118637	3.77E-04	0.28725839	0.03571429	8	8	FALSE	RBBP7	201.375	8	0	0	0.7744376		FALSE	0	RBBP7	1106312	0.14762693
2643	4.33997344	1.65E-05	0.23041616	0	2	9	FALSE	TCEA1	39.5	2	0	0	0.69636605		FALSE	0	TCEA1	6216	0.5
2646	4.01372289	5.26E-05	0.24914525	0	3	7	FALSE	BEND7	27.66666667	3	0	0	0.72602519		FALSE	0	BEND7	142310	0.34188034
2648	3.41124391	6.46E-04	0.2931482	0.03030303	12	7	FALSE	RBBP4	151.1666667	12	0	0	0.78079601		FALSE	0	RBBP4	1321128	0.10061315
2650	3.78696326	8.24E-04	0.26406382	0.01818182	11	8	FALSE	EDN1	8	11	0	0	0.7466397	mRNAup	FALSE	0	EDN1	453760	0.10115237
2652	3.6956618	7.38E-04	0.27058753	0	13	7	FALSE	UBQLN4	34.38461538	13	0	0	0.75493984		FALSE	0	UBQLN4	1034764	0.08346154
2655	3.06352368	0.00338919	0.3264215	0.01322751	28	8	FALSE	EDNRA	39.64285714	28	0	0	0.81240694	mRNAup	FALSE	0	EDNRA	2353944	0.04133739
2657	3.521027	0.00112238	0.28400805	0	14	7	FALSE	BAG6	78.78571429	14	0	0	0.77081573		FALSE	0	BAG6	1376740	0.07701556
2659	4.10646304	1.66E-05	0.24351857	0	4	9	FALSE	BAT3	18	4	0	0	0.71759427		FALSE	0	BAT3	41742	0.265625
2661	3.11963258	0.00171163	0.32055057	0.00307692	26	7	FALSE	EFEMP1	28	26	0	0	0.80730613	mRNAdown	FALSE	0	EFEMP1	1928676	0.04775471
2662	3.97189022	3.33E-06	0.2517693	0	2	7	FALSE	TXNDC5	68.5	2	0	0	0.72982816		FALSE	0	TXNDC5	6440	0.50373134
2664	4.11952191	0	0.24274662	0	1	8	FALSE	RIC8A	26	1	0	0	0.7164071		FALSE	0	RIC8A	0	0
2666	3.4768703	2.98E-04	0.28761499	0.04444444	10	8	FALSE	RAF1	136.7	10	0	0	0.77482997		FALSE	0	RAF1	790772	0.12383985
2668	3.95429394	2.12E-05	0.25288965	0	3	8	FALSE	GFI1B	29.66666667	3	0	0	0.73142782		FALSE	0	GFI1B	15778	0.35390947
2670	3.6605799	2.68E-04	0.27318076	0.03571429	8	7	FALSE	TNIP1	79.75	8	0	0	0.7581291		FALSE	0	TNIP1	286824	0.13884007
2672	3.43691899	5.91E-04	0.29095827	0.16483516	14	7	FALSE	KHDRBS1	119.1428571	14	0	0	0.77846191		FALSE	0	KHDRBS1	1333222	0.09448104
2674	4.06330235	4.47E-06	0.24610524	0	2	8	FALSE	PROP1	26	2	0	0	0.72151797		FALSE	0	PROP1	3878	0.5
2676	3.84251881	2.69E-05	0.26024596	0	3	8	FALSE	ARAF	140.6666667	3	0	0	0.7415892		FALSE	0	ARAF	53318	0.34570957
2679	3.55323152	9.68E-04	0.28143396	0	14	8	FALSE	SGTA	56	14	0	0	0.76788804		FALSE	0	SGTA	1685466	0.07746479
2681	3.91279327	4.53E-06	0.2555719	0	2	8	FALSE	SOCS6	64	2	0	0	0.73520061		FALSE	0	SOCS6	5366	0.504
2686	3.1062417	0.00153079	0.32193245	0	29	6	FALSE	EFHD2	29.55172414	29	0	0	0.80852348	mRNAup	FALSE	0	EFHD2	2520688	0.04931213
2688	3.94278442	8.88E-06	0.25362787	0.33333333	3	7	FALSE	RAD51D	72.66666667	3	0	0	0.73247414		FALSE	0	RAD51D	10212	0.37870855
2692	3.72819832	1.63E-05	0.26822607	0.16666667	4	7	FALSE	GMPS	110.25	4	0	0	0.75198197		FALSE	0	GMPS	26262	0.25884434
2695	4.0459274	7.23E-06	0.24716212	0	2	7	FALSE	IDH1	62.5	2	0	0	0.72309751		FALSE	0	IDH1	19044	0.50826446
2702	3.31252767	6.06E-04	0.30188427	0.05555556	9	7	FALSE	VARS	224	9	0	0	0.78977021		FALSE	0	VARS	1673118	0.13082227
2705	4.10613103	0	0.24353826	0	1	7	FALSE	ARPC4-TTLL3	29	1	0	0	0.71762445		FALSE	0	ARPC4-TTLL3	0	0
2707	4.10613103	0	0.24353826	0	1	7	FALSE	TSTA3	29	1	0	0	0.71762445		FALSE	0	TSTA3	0	0
2711	3.54282869	1.01E-04	0.28226033	0.06666667	6	7	FALSE	ENO2	170.5	6	0	0	0.76883376		FALSE	0	ENO2	271802	0.18261649
2713	3.96779548	1.54E-05	0.25202912	0	3	7	FALSE	GLRX3	47	3	0	0	0.73020041		FALSE	0	GLRX3	14938	0.34074074
2715	4.0273351	5.88E-06	0.24830315	0	4	8	FALSE	EPDR1	12.75	4	0	0	0.72478772	mRNAup	FALSE	0	EPDR1	16946	0.26111111
2718	3.75199203	8.99E-05	0.26652509	0	5	7	FALSE	EEF2K	56.6	5	0	0	0.74981891		FALSE	0	EEF2K	105654	0.20516605
2720	3.4351483	6.64E-04	0.29110825	0.01169591	19	7	FALSE	GABARAPL1	72.94736842	19	0	0	0.77862288		FALSE	0	GABARAPL1	1806200	0.07172753
2722	3.67175741	6.49E-05	0.27234915	0.1	5	8	FALSE	EREG	28.8	5	0	0	0.75711296	mRNAup	FALSE	0	EREG	59972	0.21044776
2723	4.0038734	2.38E-06	0.24975815	0	2	7	FALSE	RAB4A	39.5	2	0	0	0.7269206		FALSE	0	RAB4A	1378	0.5
2725	3.05112882	0.00388458	0.32774755	0.01040253	67	7	FALSE	ERBB4	23.67164179	67	0	0	0.81353374	mRNAdown	FALSE	0	ERBB4	7677376	0.02994804
2727	4.12605135	2.58E-06	0.24236247	0	2	9	FALSE	TMX4	30.5	2	0	0	0.71581351		FALSE	0	TMX4	1714	0.5
2731	2.89154493	0.03077442	0.34583588	0.0020598	301	7	FALSE	EZH2	10.69435216	301	0	0	0.82804137	mRNAup	FALSE	0	EZH2	76191338	0.00808344
2733	3.72189022	3.91E-05	0.26868068	0	3	7	FALSE	SYNE1	249.3333333	3	0	0	0.75255543		FALSE	0	SYNE1	156688	0.35274621
2735	3.50177069	6.65E-05	0.28556981	0.16666667	4	7	FALSE	EFTUD2	352.25	4	0	0	0.7725663		FALSE	0	EFTUD2	546150	0.28831967
2737	3.6914564	5.60E-05	0.27089579	0	3	8	FALSE	ATP5C1	215.6666667	3	0	0	0.75532215		FALSE	0	ATP5C1	167098	0.34905149
2739	3.33189464	0.00119082	0.30012954	0.00952381	15	8	FALSE	ILF3	151.2666667	15	0	0	0.78800958		FALSE	0	ILF3	3860466	0.09005988
2741	3.10922975	0.00165075	0.32162306	0.06666667	16	7	FALSE	GNB2L1	215	16	0	0	0.80825184		FALSE	0	GNB2L1	5594240	0.08838514
2743	3.64420097	8.58E-05	0.27440858	0	4	7	FALSE	LUC7L2	193.5	4	0	0	0.75961809		FALSE	0	LUC7L2	245696	0.27150917
2747	3.6293714	1.01E-04	0.27552981	0	5	7	FALSE	PHB2	150.8	5	0	0	0.76096624		FALSE	0	PHB2	222574	0.21836735
2749	3.54194334	2.64E-04	0.28233089	0	5	7	FALSE	ZNF638	265.4	5	0	0	0.76891424		FALSE	0	ZNF638	921152	0.22636986
2752	3.75619743	8.54E-05	0.26622669	0	4	8	FALSE	KLC1	159.5	4	0	0	0.7494366		FALSE	0	KLC1	288976	0.2659396
2754	3.87007525	3.71E-05	0.25839291	0	2	8	FALSE	ASPSCR1	184	2	0	0	0.73908407		FALSE	0	ASPSCR1	59750	0.50274725
2756	3.40272244	3.39E-04	0.29388233	0.12727273	11	7	FALSE	LIMA1	146.8181818	11	0	0	0.78157069		FALSE	0	LIMA1	1121012	0.11791831
2758	3.8877822	6.32E-06	0.25721605	0	2	8	FALSE	KDM5B	153.5	2	0	0	0.73747435		FALSE	0	KDM5B	20532	0.50164474
2760	3.89143426	0	0.25697466	0	1	8	FALSE	HIST1H2AB	301	1	0	0	0.73714234		FALSE	0	HIST1H2AB	0	0
2762	3.63523683	2.46E-04	0.27508524	0.06666667	6	7	FALSE	ADAR	190.1666667	6	0	0	0.76043302		FALSE	0	ADAR	697070	0.19356486
2764	3.64121293	3.46E-04	0.27463376	0.1	5	7	FALSE	WDR61	188.2	5	0	0	0.75988973		FALSE	0	WDR61	1047378	0.21489118
2768	3.62538734	6.62E-05	0.2758326	0.2	5	8	FALSE	SNRPD2	197.2	5	0	0	0.76132842		FALSE	0	SNRPD2	319860	0.23597122
2771	3.48339973	1.96E-04	0.28707587	0	5	7	FALSE	DHX36	256.4	5	0	0	0.77423639		FALSE	0	DHX36	639042	0.2294699
2773	3.49203187	3.06E-04	0.28636623	0	7	7	FALSE	IMMT	182.5714286	7	0	0	0.77345165		FALSE	0	IMMT	997014	0.16211735
2775	3.65261178	2.42E-04	0.2737767	0.02777778	9	8	FALSE	PPARG	79.66666667	9	0	0	0.75885347		FALSE	0	PPARG	616780	0.12502201
2777	3.72974768	5.64E-05	0.26811465	0	4	8	FALSE	CPSF1	181	4	0	0	0.75184112		FALSE	0	CPSF1	259720	0.2764977
2779	3.58089863	7.47E-05	0.27925951	0	3	7	FALSE	TPI1	343.6666667	3	0	0	0.76537285		FALSE	0	TPI1	264108	0.35362917
2781	3.51350155	2.92E-04	0.28461635	0	8	7	FALSE	ATP5B	150.25	8	0	0	0.77149986		FALSE	0	ATP5B	989644	0.14806548
2783	3.46978752	2.11E-04	0.28820209	0	7	8	FALSE	ILF2	218	7	0	0	0.77547386		FALSE	0	ILF2	918860	0.17728758
2785	3.8145197	3.98E-05	0.2621562	0	3	8	FALSE	NUDT21	142.3333333	3	0	0	0.74413457		FALSE	0	NUDT21	68382	0.34304207
2787	3.89143426	0	0.25697466	0	1	8	FALSE	ANXA4	301	1	0	0	0.73714234		FALSE	0	ANXA4	0	0
2789	3.68581231	2.60E-05	0.27131061	0	2	8	FALSE	PSMB6	319.5	2	0	0	0.75583524		FALSE	0	PSMB6	109294	0.51205788
2791	3.49811864	1.72E-04	0.28586795	0	6	8	FALSE	EPRS	225.3333333	6	0	0	0.77289831		FALSE	0	EPRS	730396	0.19092199
2793	3.61874723	6.99E-05	0.27633873	0.1	5	8	FALSE	RBM39	170.2	5	0	0	0.76193207		FALSE	0	RBM39	230546	0.21940492
2796	3.85137229	8.63E-06	0.25964771	0	2	8	FALSE	AKAP8	170	2	0	0	0.74078434		FALSE	0	AKAP8	12670	0.50598802
2798	3.49236388	4.13E-04	0.28633901	0	7	7	FALSE	COPB1	181.1428571	7	0	0	0.77342147		FALSE	0	COPB1	655092	0.15941846
2800	3.40205843	2.56E-04	0.29393969	0.10714286	8	7	FALSE	PRMT5	224.5	8	0	0	0.78163105		FALSE	0	PRMT5	1149168	0.1515382
2802	3.58444002	5.36E-05	0.27898361	0	3	8	FALSE	HYOU1	353.3333333	3	0	0	0.76505091		FALSE	0	HYOU1	287590	0.35915732
2804	3.04426737	0.00287203	0.32848626	0.00907441	58	8	FALSE	HIST1H2AE	26.05172414	58	0	0	0.81415751	mRNAup	FALSE	0	HIST1H2AE	6460838	0.02911217
2806	3.89143426	0	0.25697466	0	1	8	FALSE	DYNLT3	301	1	0	0	0.73714234		FALSE	0	DYNLT3	0	0
2808	3.49147853	4.28E-04	0.28641161	0	5	7	FALSE	SNRNP200	277	5	0	0	0.77350195		FALSE	0	SNRNP200	1215414	0.22186495
2812	3.58665339	6.39E-05	0.27881144	0.2	5	7	FALSE	SON	219	5	0	0	0.76484969		FALSE	0	SON	327268	0.23426124
2814	3.25442674	5.42E-04	0.30727378	0.05454545	11	7	FALSE	DDX3X	232.1818182	11	0	0	0.79505211		FALSE	0	DDX3X	2761826	0.12568441
2817	3.77456839	2.66E-04	0.26493095	0	5	8	FALSE	FAM120A	125.8	5	0	0	0.74776651		FALSE	0	FAM120A	628558	0.208
2821	3.60734838	1.16E-04	0.27721193	0	5	8	FALSE	HNRNPAB	190.6	5	0	0	0.76296833		FALSE	0	HNRNPAB	412664	0.22926239
2824	3.09683488	4.44E-04	0.32291034	0.05128205	13	8	FALSE	IGLL5	73.76923077	13	0	0	0.80937865	mRNAup	FALSE	0	IGLL5	699210	0.09167149
2826	2.88224878	0.00566593	0.34695131	0.01569416	71	6	FALSE	H2AFY	40.69014085	71	0	0	0.82888647	mRNAup	FALSE	0	H2AFY	8550662	0.02037606
2828	3.73207171	5.54E-05	0.26794769	0	3	8	FALSE	SNRPN	223.3333333	3	0	0	0.75162984		FALSE	0	SNRPN	155336	0.35123749
2830	3.60790173	2.07E-05	0.27716941	0	2	8	FALSE	FBXL18	478.5	2	0	0	0.76291802		FALSE	0	FBXL18	171166	0.52820796
2834	3.74856131	1.80E-05	0.26676901	0	3	8	FALSE	PDS5A	153.6666667	3	0	0	0.75013079		FALSE	0	PDS5A	50960	0.35095785
2836	3.28220452	6.71E-04	0.30467328	0.01818182	11	8	FALSE	DHX9	226.5454546	11	0	0	0.79252686		FALSE	0	DHX9	2878418	0.11949564
2838	3.6269367	1.15E-04	0.27571477	0	5	7	FALSE	KIF5B	214.6	5	0	0	0.76118757		FALSE	0	KIF5B	559002	0.22111801
2840	3.35004427	2.10E-04	0.29850352	0	6	7	FALSE	KLC2	265.6666667	6	0	0	0.78635961		FALSE	0	KLC2	917992	0.18797348
2842	3.88556884	6.97E-06	0.25736257	0	2	8	FALSE	ANKFY1	164	2	0	0	0.73767556		FALSE	0	ANKFY1	15816	0.50621118
2845	3.71812749	8.97E-05	0.26895259	0	4	7	FALSE	KLC4	144.25	4	0	0	0.7528975		FALSE	0	KLC4	166260	0.26284404
2847	3.89143426	0	0.25697466	0	1	8	FALSE	SYT-SSX2	301	1	0	0	0.73714234		FALSE	0	SYT-SSX2	0	0
2849	3.84296149	3.55E-05	0.26021598	0	5	7	FALSE	KLHL12	70.4	5	0	0	0.74154896		FALSE	0	KLHL12	38076	0.20292398
2851	3.38933156	3.00E-04	0.29504343	0.04761905	7	7	FALSE	NOP2	299.1428571	7	0	0	0.78278804		FALSE	0	NOP2	1858780	0.18421517
2854	3.66102258	2.34E-04	0.27314773	0	8	7	FALSE	SUV39H1	78.25	8	0	0	0.75808886		FALSE	0	SUV39H1	283754	0.13528897
2857	3.87317397	9.80E-06	0.25818618	0	3	8	FALSE	BHLHE40	116.3333333	3	0	0	0.73880237		FALSE	0	BHLHE40	31362	0.33921569
2859	3.35314298	6.87E-04	0.29822766	0.03571429	8	7	FALSE	PDCD6IP	245.125	8	0	0	0.78607791		FALSE	0	PDCD6IP	1611262	0.14748039
2861	3.63999557	4.85E-05	0.27472561	0.23809524	7	7	FALSE	SUZ12	95.57142857	7	0	0	0.7600004		FALSE	0	SUZ12	166554	0.16625187
2863	3.89143426	0	0.25697466	0	1	8	FALSE	EHMT1	301	1	0	0	0.73714234		FALSE	0	EHMT1	0	0
2866	3.82193448	4.46E-05	0.2616476	0	3	8	FALSE	FLG	132	3	0	0	0.7434605		FALSE	0	FLG	116870	0.34114583
2868	2.92684816	0.00481222	0.34166446	0.05128779	95	7	FALSE	VAV1	32.21052632	95	0	0	0.82483199	mRNAup	FALSE	0	VAV1	8641188	0.02176822
2871	3.89143426	0	0.25697466	0	1	8	FALSE	MTF2	301	1	0	0	0.73714234		FALSE	0	MTF2	0	0
2873	3.6518371	5.10E-05	0.27383478	0	5	7	FALSE	MAGOH	123.2	5	0	0	0.7589239		FALSE	0	MAGOH	180724	0.21705151
2875	2.89143426	0.0097816	0.34584912	0.00824897	127	6	FALSE	PHGDH	24.09448819	127	0	0	0.82805143	mRNAdown	FALSE	0	PHGDH	17843658	0.01392664
2877	3.89143426	0	0.25697466	0	1	8	FALSE	JARID2	301	1	0	0	0.73714234		FALSE	0	JARID2	0	0
2879	3.43880035	2.98E-04	0.29079909	0.13888889	9	7	FALSE	RBM14	201	9	0	0	0.77829088		FALSE	0	RBM14	1075136	0.138372
2882	3.54614874	1.06E-04	0.28199607	0.2	6	7	FALSE	THRAP3	196.3333333	6	0	0	0.76853193		FALSE	0	THRAP3	564532	0.20244238
2885	3.50996016	1.93E-04	0.28490352	0	5	7	FALSE	LARP1	261.8	5	0	0	0.7718218		FALSE	0	LARP1	688350	0.24488263
2887	3.78972997	6.40E-05	0.26387104	0	3	8	FALSE	SRSF9	170.3333333	3	0	0	0.74638818		FALSE	0	SRSF9	210336	0.35799859
2889	3.59428951	4.04E-05	0.2782191	0.13333333	6	7	FALSE	U2AF2	136.8333333	6	0	0	0.7641555		FALSE	0	U2AF2	156484	0.20167653
2892	3.69698982	1.03E-04	0.27049033	0	6	7	FALSE	SNAI1	96.16666667	6	0	0	0.75481911		FALSE	0	SNAI1	172568	0.17590881
2894	3.85635237	1.07E-05	0.2593124	0	3	8	FALSE	MYOD1	130	3	0	0	0.7403316		FALSE	0	MYOD1	37674	0.3458445
2897	3.63180611	6.59E-05	0.2753451	0.06666667	6	7	FALSE	H3F3B	122.8333333	6	0	0	0.7607449		FALSE	0	H3F3B	352606	0.19453291
2899	3.7310757	2.93E-05	0.26801922	0	3	7	FALSE	CHCHD3	181	3	0	0	0.75172039		FALSE	0	CHCHD3	96968	0.3515625
2901	3.57912793	4.59E-04	0.27939767	0	9	7	FALSE	NINL	123.6666667	9	0	0	0.76553382		FALSE	0	NINL	1102904	0.12428234
2903	3.39818504	5.03E-04	0.29427473	0.01818182	11	7	FALSE	HSPA1B	151.5454546	11	0	0	0.78198318		FALSE	0	HSPA1B	1624628	0.11140227
2905	3.89143426	0	0.25697466	0	1	8	FALSE	EPC2	301	1	0	0	0.73714234		FALSE	0	EPC2	0	0
2907	3.27833112	7.78E-04	0.30503325	0.05714286	15	7	FALSE	FUS	170.1333333	15	0	0	0.79287899		FALSE	0	FUS	2403314	0.08951074
2911	3.89143426	0	0.25697466	0	1	8	FALSE	SERPINB12	301	1	0	0	0.73714234		FALSE	0	SERPINB12	0	0
2913	3.89143426	0	0.25697466	0	1	8	FALSE	POTEE	301	1	0	0	0.73714234		FALSE	0	POTEE	0	0
2916	3.56440903	2.75E-04	0.28055142	0.14285714	7	7	FALSE	HIST4H4	140	7	0	0	0.76687191		FALSE	0	HIST4H4	689288	0.15878433
2918	3.84738822	1.58E-05	0.25991658	0	2	8	FALSE	DSC3	168.5	2	0	0	0.74114653		FALSE	0	DSC3	14992	0.50149701
2920	3.71126605	2.93E-05	0.26944983	0	3	7	FALSE	ZC3HAV1	301.6666667	3	0	0	0.75352127		FALSE	0	ZC3HAV1	226350	0.41130871
2922	3.32746791	2.80E-04	0.30052882	0.10714286	8	7	FALSE	PABPC4	308	8	0	0	0.78841201		FALSE	0	PABPC4	2065088	0.17284992
2924	3.89143426	0	0.25697466	0	1	8	FALSE	RAP1GAP	301	1	0	0	0.73714234		FALSE	0	RAP1GAP	0	0
2926	3.87029659	5.99E-05	0.25837813	0	5	8	FALSE	PHF1	76.6	5	0	0	0.73906395		FALSE	0	PHF1	149380	0.20769231
2928	2.93238158	0.00799654	0.34101974	0.01042502	87	8	FALSE	SNRPF	27.24137931	87	0	0	0.82432895	mRNAdown	FALSE	0	SNRPF	9940286	0.01703152
2930	3.71536078	1.76E-05	0.26915287	0	2	8	FALSE	SLC25A10	297.5	2	0	0	0.75314902		FALSE	0	SLC25A10	92430	0.52108963
2933	3.86520584	1.13E-05	0.25871843	0	2	7	FALSE	PIN4	171.5	2	0	0	0.73952674		FALSE	0	PIN4	21666	0.50443787
2935	3.68868969	7.58E-05	0.27109898	0	3	7	FALSE	KAT7	277	3	0	0	0.75557366		FALSE	0	KAT7	265788	0.3556701
2937	3.47576361	1.71E-04	0.28770656	0.06666667	6	8	FALSE	FBL	255.1666667	6	0	0	0.77493058		FALSE	0	FBL	897514	0.19338906
2939	3.3832448	0.00151905	0.29557424	0.0130719	18	7	FALSE	SIRT1	92	18	0	0	0.78334138		FALSE	0	SIRT1	3692952	0.0666342
2942	3.47244356	2.46E-04	0.28798164	0	6	7	FALSE	UPF1	286.3333333	6	0	0	0.7752324		FALSE	0	UPF1	1233812	0.2079689
2944	3.37682603	0.00105648	0.29613607	0.01298701	22	7	FALSE	HDAC1	80.54545455	22	0	0	0.78392491		FALSE	0	HDAC1	2411824	0.06131647
2946	3.60270031	3.77E-05	0.27756958	0	4	8	FALSE	YBX3	256.5	4	0	0	0.76339088		FALSE	0	YBX3	308914	0.30562201
2948	3.89143426	0	0.25697466	0	1	8	FALSE	HOTAIR	301	1	0	0	0.73714234		FALSE	0	HOTAIR	0	0
2950	3.80920761	7.68E-05	0.26252179	0.16666667	4	7	FALSE	CEP63	108.5	4	0	0	0.74461749		FALSE	0	CEP63	96788	0.25775656
2952	3.62084993	9.18E-05	0.27617825	0	5	7	FALSE	SAFB2	210.2	5	0	0	0.76174092		FALSE	0	SAFB2	519552	0.24382284
2954	3.81474104	3.11E-05	0.26214099	0	3	7	FALSE	ERG	137	3	0	0	0.74411445		FALSE	0	ERG	72546	0.3443038
2958	3.66290394	4.72E-05	0.27300743	0.16666667	4	8	FALSE	SNRPA	234	4	0	0	0.75791782		FALSE	0	SNRPA	275964	0.28545232
2960	3.65017707	1.72E-04	0.27395931	0	4	7	FALSE	FAM208A	220.25	4	0	0	0.75907481		FALSE	0	FAM208A	317470	0.2664034
2962	3.87328464	1.54E-05	0.25817881	0	2	8	FALSE	CDKN2C	157.5	2	0	0	0.73879231		FALSE	0	CDKN2C	7628	0.5
2964	3.89143426	0	0.25697466	0	1	8	FALSE	TDRD1	301	1	0	0	0.73714234		FALSE	0	TDRD1	0	0
2966	3.52622842	0.00107361	0.28358912	0.02777778	9	7	FALSE	CHD4	166.5555556	9	0	0	0.77034287		FALSE	0	CHD4	2653154	0.13644262
2968	3.89143426	0	0.25697466	0	1	8	FALSE	AEBP2	301	1	0	0	0.73714234		FALSE	0	AEBP2	0	0
2970	3.56573705	5.12E-05	0.28044693	0.2	5	8	FALSE	SNRPD1	222.6	5	0	0	0.76675118		FALSE	0	SNRPD1	350534	0.24826816
2972	3.84417884	6.93E-06	0.26013358	0	2	8	FALSE	PML-RAR	180	2	0	0	0.74143829		FALSE	0	PML-RAR	20278	0.51289398
2974	3.89143426	0	0.25697466	0	1	8	FALSE	C17ORF96	301	1	0	0	0.73714234		FALSE	0	C17ORF96	0	0
2976	3.67983621	9.55E-05	0.27175123	0.13333333	6	7	FALSE	TRIM25	120.6666667	6	0	0	0.75637853		FALSE	0	TRIM25	189180	0.1785361
2979	3.39907039	0.00163359	0.29419809	0.03157895	20	7	FALSE	PKM	92.2	20	0	0	0.78190269		FALSE	0	PKM	3556176	0.06488306
2981	3.68382027	4.13E-04	0.27145733	0	11	7	FALSE	CCDC85B	64.54545455	11	0	0	0.75601634		FALSE	0	CCDC85B	721754	0.10282436
2983	3.64265162	8.39E-05	0.27452529	0	5	7	FALSE	SNRNP70	195.8	5	0	0	0.75975894		FALSE	0	SNRNP70	346242	0.22237443
2985	3.44256308	5.72E-04	0.29048124	0.04444444	10	7	FALSE	AGO2	147.1	10	0	0	0.77794881		FALSE	0	AGO2	1490076	0.12157676
2987	3.39862771	2.05E-04	0.29423641	0	7	7	FALSE	TUBB4B	246	7	0	0	0.78194294		FALSE	0	TUBB4B	1041746	0.17575323
2989	3.89143426	0	0.25697466	0	1	8	FALSE	HLX	301	1	0	0	0.73714234		FALSE	0	HLX	0	0
2991	3.68581231	2.60E-05	0.27131061	0	2	8	FALSE	SNRPB2	319.5	2	0	0	0.75583524		FALSE	0	SNRPB2	109294	0.51205788
2995	3.82115981	1.25E-05	0.26170065	0	3	8	FALSE	WWP2	117.6666667	3	0	0	0.74353093		FALSE	0	WWP2	18476	0.3411306
2998	3.49203187	4.38E-04	0.28636623	0.07142857	8	8	FALSE	ATP2A2	158.5	8	0	0	0.77345165		FALSE	0	ATP2A2	945086	0.14616096
3000	3.30367419	0.00176187	0.30269329	0.02564103	13	7	FALSE	HSPA1A	174.3846154	13	0	0	0.79057507		FALSE	0	HSPA1A	4950728	0.0959201
3003	3.57060646	1.52E-04	0.28006447	0.05555556	9	7	FALSE	HIST3H3	101.5555556	9	0	0	0.7663085		FALSE	0	HIST3H3	585988	0.12967724
3005	3.52556441	1.56E-04	0.28364253	0.04761905	7	7	FALSE	SF3B3	173	7	0	0	0.77040324		FALSE	0	SF3B3	721858	0.16990702
3008	3.89143426	0	0.25697466	0	1	8	FALSE	C10orf12	301	1	0	0	0.73714234		FALSE	0	C10orf12	0	0
3010	3.68802568	5.78E-05	0.27114779	0	4	7	FALSE	MKI67	256.75	4	0	0	0.75563403		FALSE	0	MKI67	398456	0.3196875
3012	3.65360779	4.18E-05	0.27370207	0.13333333	6	7	FALSE	HIST1H3J	122.1666667	6	0	0	0.75876293		FALSE	0	HIST1H3J	287924	0.20077008
3014	3.70351926	8.98E-05	0.27001345	0	4	7	FALSE	DHX30	234.25	4	0	0	0.75422552		FALSE	0	DHX30	298820	0.30731225
3016	3.85701638	1.56E-05	0.25926776	0	2	8	FALSE	PHF5A	162	2	0	0	0.74027124		FALSE	0	PHF5A	12234	0.503125
3018	3.70661797	2.46E-05	0.26978772	0.33333333	4	7	FALSE	ATRX	138	4	0	0	0.75394382		FALSE	0	ATRX	104084	0.27828283
3022	3.67729084	5.73E-05	0.27193933	0	3	7	FALSE	LRRFIP1	311.6666667	3	0	0	0.75660992		FALSE	0	LRRFIP1	380902	0.36721828
3024	3.65161576	1.03E-04	0.27385138	0.03571429	8	7	FALSE	CUL4B	101	8	0	0	0.75894402		FALSE	0	CUL4B	324212	0.14466089
3026	3.85989376	3.33E-05	0.25907449	0	3	7	FALSE	SMYD3	108.6666667	3	0	0	0.74000966		FALSE	0	SMYD3	41566	0.33541018
3028	3.6164232	1.83E-04	0.27651631	0.1	5	7	FALSE	GTF3C1	134.6	5	0	0	0.76214335		FALSE	0	GTF3C1	184666	0.22039474
3030	3.56352368	8.15E-05	0.28062112	0.2	6	7	FALSE	SRSF10	175.1666667	6	0	0	0.76695239		FALSE	0	SRSF10	338128	0.20072713
3032	3.67220009	2.55E-05	0.27231632	0.16666667	4	7	FALSE	SRSF7	157	4	0	0	0.75707272		FALSE	0	SRSF7	104736	0.28506375
3034	3.65748119	2.28E-04	0.27341221	0	9	8	FALSE	WWP1	79.44444444	9	0	0	0.7584108		FALSE	0	WWP1	629954	0.12334032
3036	3.89143426	0	0.25697466	0	1	8	FALSE	ARG1	301	1	0	0	0.73714234		FALSE	0	ARG1	0	0
3038	3.72587428	1.78E-05	0.26839338	0	2	7	FALSE	LGALS7	368.5	2	0	0	0.75219325		FALSE	0	LGALS7	137362	0.52877698
3040	3.57204515	1.66E-04	0.27995167	0	6	7	FALSE	SRSF3	145.6666667	6	0	0	0.76617771		FALSE	0	SRSF3	301810	0.19844536
3042	3.70008853	7.22E-05	0.2702638	0	3	7	FALSE	ERH	248.6666667	3	0	0	0.75453741		FALSE	0	ERH	214214	0.35431569
3044	3.80478088	1.02E-05	0.26282723	0	2	8	FALSE	POLA2	213	2	0	0	0.74501992		FALSE	0	POLA2	41670	0.51707317
3046	3.35679504	2.46E-04	0.2979032	0.04761905	7	7	FALSE	SF3B1	292.1428571	7	0	0	0.78574591		FALSE	0	SF3B1	1639844	0.18191546
3048	3.84705622	4.34E-06	0.25993901	0	2	8	FALSE	POU5F1	178.5	2	0	0	0.74117671		FALSE	0	POU5F1	16422	0.50569801
3052	3.21646746	8.33E-04	0.31090008	0.02564103	13	7	FALSE	TRIM28	202.3076923	13	0	0	0.79850296		FALSE	0	TRIM28	2988606	0.09902524
3054	3.32248783	3.56E-04	0.30097928	0	9	7	FALSE	DDX5	242	9	0	0	0.78886474		FALSE	0	DDX5	1889698	0.14623786
3056	3.60270031	3.77E-05	0.27756958	0	4	8	FALSE	CSDA	256.5	4	0	0	0.76339088		FALSE	0	CSDA	308914	0.30562201
3058	3.68581231	2.60E-05	0.27131061	0	2	8	FALSE	LRRC40	319.5	2	0	0	0.75583524		FALSE	0	LRRC40	109294	0.51205788
3060	3.42441346	3.27E-04	0.29202081	0.07142857	8	7	FALSE	P4HB	209.625	8	0	0	0.77959878		FALSE	0	P4HB	1196796	0.15153986
3062	3.57835325	8.46E-05	0.27945816	0.13333333	6	7	FALSE	U2AF1	155.3333333	6	0	0	0.76560425		FALSE	0	U2AF1	342188	0.20266143
3064	3.76737494	5.40E-05	0.26543681	0.16666667	4	7	FALSE	RARA	154.5	4	0	0	0.74842046		FALSE	0	RARA	235110	0.27256637
3066	3.52534307	1.00E-04	0.28366034	0	4	8	FALSE	TAF15	325.25	4	0	0	0.77042336		FALSE	0	TAF15	572372	0.27713675
3068	3.75818946	3.50E-05	0.26608557	0	4	8	FALSE	MED1	149	4	0	0	0.7492555		FALSE	0	MED1	143226	0.2787194
3070	3.86398849	2.31E-05	0.25879994	0	2	8	FALSE	FABP5	178	2	0	0	0.73963741		FALSE	0	FABP5	31736	0.50141643
3072	3.66179726	7.04E-05	0.27308994	0	3	8	FALSE	SSR1	230.3333333	3	0	0	0.75801843		FALSE	0	SSR1	185100	0.34331337
3074	3.82005312	3.06E-05	0.26177646	0	3	8	FALSE	OIP5	124	3	0	0	0.74363153		FALSE	0	OIP5	42164	0.33606557
3076	3.59971226	1.57E-04	0.27779998	0	5	7	FALSE	CPSF6	185.4	5	0	0	0.76366252		FALSE	0	CPSF6	531228	0.21745283
3078	3.63844622	5.77E-05	0.2748426	0	4	8	FALSE	SF3B2	222.5	4	0	0	0.76014125		FALSE	0	SF3B2	298150	0.28109137
3080	3.89143426	0	0.25697466	0	1	8	FALSE	CPSF2	301	1	0	0	0.73714234		FALSE	0	CPSF2	0	0
3082	3.7226649	4.79E-05	0.26862477	0	5	7	FALSE	RBX1	120	5	0	0	0.75248501		FALSE	0	RBX1	150110	0.21755027
3085	3.34617087	5.12E-04	0.29884905	0.02222222	10	7	FALSE	TUBA1B	206.2	10	0	0	0.78671174		FALSE	0	TUBA1B	2130498	0.12410876
3088	3.83034529	1.26E-05	0.26107307	0	3	7	FALSE	RALY	130.6666667	3	0	0	0.74269588		FALSE	0	RALY	31916	0.34394341
3090	3.72587428	1.78E-05	0.26839338	0	2	7	FALSE	NOP14	368.5	2	0	0	0.75219325		FALSE	0	NOP14	137362	0.52877698
3092	3.61055777	9.24E-05	0.27696552	0.13333333	6	7	FALSE	SRSF1	142.1666667	6	0	0	0.76267657		FALSE	0	SRSF1	255516	0.18888889
3094	3.08045595	0.01015899	0.32462727	0.0057971	70	7	FALSE	ELAVL1	40.25714286	70	0	0	0.81086764		FALSE	0	ELAVL1	18653226	0.01920033
3096	3.89143426	0	0.25697466	0	1	8	FALSE	CPSF7	301	1	0	0	0.73714234		FALSE	0	CPSF7	0	0
3098	3.80965029	1.07E-05	0.26249129	0	2	8	FALSE	MYLPF	220.5	2	0	0	0.74457725		FALSE	0	MYLPF	52458	0.52014218
3100	3.7833112	1.90E-05	0.26431873	0	2	7	FALSE	FIP1L1	263.5	2	0	0	0.74697171		FALSE	0	FIP1L1	88396	0.51673228
3102	3.72908367	5.38E-05	0.26816239	0	4	8	FALSE	RBL2	160.5	4	0	0	0.75190148		FALSE	0	RBL2	177810	0.26716918
3104	3.88756087	3.44E-05	0.2572307	0	2	8	FALSE	FAT1	157	2	0	0	0.73749447		FALSE	0	FAT1	152424	0.50160772
3106	3.81861443	2.41E-05	0.26187509	0	5	8	FALSE	FABP1	24	5	0	0	0.74376232	mRNAup	FALSE	0	FABP1	47088	0.21296296
3108	3.53596724	8.48E-04	0.28280805	0.0047619	21	7	FALSE	FAM110A	18	21	0	0	0.76945752	mRNAup	FALSE	0	FAM110A	1734350	0.07182873
3112	4.53585657	0	0.22046552	0	1	8	FALSE	TRIM69	21	1	0	0	0.67855849		FALSE	0	TRIM69	0	0
3115	4.03762727	5.22E-06	0.24767021	0	2	7	FALSE	PYGM	59.5	2	0	0	0.72385207		FALSE	0	PYGM	16134	0.50431034
3118	3.19721116	3.48E-04	0.31277259	0	6	8	FALSE	FAM136A	80.16666667	6	0	0	0.80025353	mRNAdown	FALSE	0	FAM136A	340356	0.17098632
3120	3.92684816	1.27E-06	0.25465716	0	2	8	FALSE	LSM1	41	2	0	0	0.73392289		FALSE	0	LSM1	1790	0.50632911
3122	3.34417884	0.00543386	0.29902707	0.00273411	77	7	FALSE	FAM161A	8.63636364	77	0	0	0.78689283	mRNAdown	FALSE	0	FAM161A	5087542	0.01908166
3123	3.90991589	3.07E-05	0.25575998	0	3	7	FALSE	ZBTB8A	73.33333333	3	0	0	0.73546219		FALSE	0	ZBTB8A	39370	0.35632184
3127	4.34406817	0	0.23019897	0	1	8	FALSE	A2ABF9	77	1	0	0	0.6959938		FALSE	0	A2ABF9	0	0
3129	3.74822931	5.97E-05	0.26679264	0	4	7	FALSE	NUTM1	98.5	4	0	0	0.75016097		FALSE	0	NUTM1	104324	0.26712329
3132	4.34406817	0	0.23019897	0	1	8	FALSE	A2RRN7	77	1	0	0	0.6959938		FALSE	0	A2RRN7	0	0
3134	3.80633023	6.24E-05	0.26272024	0	5	8	FALSE	CCDC57	43.4	5	0	0	0.74487907		FALSE	0	CCDC57	65960	0.21414141
3138	3.13512616	0.00319159	0.31896643	0.0094697	33	8	FALSE	TXLNB	20.75757576	33	0	0	0.80589762	mRNAdown	FALSE	0	TXLNB	2656806	0.03384694
3141	4.34406817	0	0.23019897	0	1	8	FALSE	TRIM15	77	1	0	0	0.6959938		FALSE	0	TRIM15	0	0
3143	4.34406817	0	0.23019897	0	1	8	FALSE	POC5	77	1	0	0	0.6959938		FALSE	0	POC5	0	0
3145	3.92054006	2.23E-05	0.2550669	0.33333333	4	7	FALSE	CEP57L1	57.25	4	0	0	0.73449636		FALSE	0	CEP57L1	21102	0.26267281
3147	3.84650288	4.25E-05	0.25997641	0	2	8	FALSE	A1A4H1	186.5	2	0	0	0.74122701		FALSE	0	A1A4H1	50494	0.50271003
3149	3.95783533	1.43E-05	0.25266337	0	3	8	FALSE	FSD2	56	3	0	0	0.73110588		FALSE	0	FSD2	21328	0.35947712
3151	4.30799026	2.36E-05	0.2321268	0	2	8	FALSE	MIPOL1	46	2	0	0	0.69927361		FALSE	0	MIPOL1	32476	0.5
3153	4.09063745	8.76E-06	0.24446068	0	2	8	FALSE	PPM1F	83	2	0	0	0.71903296		FALSE	0	PPM1F	17526	0.52229299
3155	3.76671093	1.72E-04	0.26548361	0	7	7	FALSE	LZTS2	59	7	0	0	0.74848082		FALSE	0	LZTS2	206162	0.16477273
3158	3.64940239	1.71E-04	0.27401747	0	4	8	FALSE	SSX2IP	192.75	4	0	0	0.75914524		FALSE	0	SSX2IP	178640	0.25296834
3162	3.79670208	1.13E-04	0.26338648	0	5	7	FALSE	FAM9B	82.6	5	0	0	0.74575436		FALSE	0	FAM9B	122790	0.20298507
3164	3.9831784	1.74E-05	0.25105579	0	3	7	FALSE	SYCE1	41.66666667	3	0	0	0.72880196		FALSE	0	SYCE1	15502	0.34463277
3166	4.04703409	2.10E-06	0.24709453	0	2	8	FALSE	LCA5	44.5	2	0	0	0.7229969		FALSE	0	LCA5	3020	0.51785714
3168	3.61764055	3.00E-04	0.27642326	0.02222222	10	8	FALSE	FAM65B	18.4	10	0	0	0.76203268	mRNAup	FALSE	0	FAM65B	212562	0.11428571
3169	3.41544931	5.79E-04	0.29278725	0.04166667	16	7	FALSE	RHOA	83.25	16	0	0	0.7804137		FALSE	0	RHOA	1019942	0.07552559
3171	3.64088092	1.18E-04	0.2746588	0	8	7	FALSE	WNK1	69.875	8	0	0	0.75991992		FALSE	0	WNK1	223736	0.1321977
3173	3.92363878	6.36E-06	0.25486546	0	2	8	FALSE	MAP2K2	69.5	2	0	0	0.73421466		FALSE	0	MAP2K2	2916	0.5
3175	3.31186366	7.55E-04	0.3019448	0.03333333	16	7	FALSE	HDAC6	121.5625	16	0	0	0.78983058		FALSE	0	HDAC6	1896000	0.07647663
3177	4.61752988	0	0.21656601	0	1	9	FALSE	MYOF	10	1	0	0	0.67113365		FALSE	0	MYOF	0	0
3181	3.64110226	3.27E-04	0.27464211	0.00666667	25	7	FALSE	FAM74A6	13.64	25	0	0	0.75989979		FALSE	0	FAM74A6	442210	0.05773756
3182	3.82005312	5.32E-05	0.26177646	0	9	8	FALSE	KRT31	36	9	0	0	0.74363153		FALSE	0	KRT31	125380	0.14705882
3185	3.65903054	3.28E-04	0.27329643	0.05454545	11	7	FALSE	TCF4	53.63636364	11	0	0	0.75826995		FALSE	0	TCF4	458878	0.10618182
3188	3.02467906	0.00939744	0.33061359	0.00592105	96	7	FALSE	IKZF1	14.21875	96	0	0	0.81593827	mRNAup	FALSE	0	IKZF1	9361962	0.01498984
3190	3.15659584	0.00843146	0.31679697	0.00864865	75	6	FALSE	STX11	19.32	75	0	0	0.80394583	mRNAup	FALSE	0	STX11	6542974	0.01598634
3192	3.98782647	7.56E-06	0.25076317	0	4	8	FALSE	KRTAP5-9	40.25	4	0	0	0.72837941		FALSE	0	KRTAP5-9	14766	0.35044643
3194	3.95042054	9.10E-05	0.25313761	0	8	8	FALSE	CCNDBP1	24.75	8	0	0	0.73177995		FALSE	0	CCNDBP1	227830	0.17463235
3196	3.90061974	1.10E-04	0.25636952	0	7	7	FALSE	EFEMP2	33.42857143	7	0	0	0.7363073		FALSE	0	EFEMP2	121494	0.17434716
3199	3.77965914	1.44E-04	0.26457412	0.04761905	7	7	FALSE	A4D127	38.28571429	7	0	0	0.74730371		FALSE	0	A4D127	202512	0.15211105
3204	3.53950863	0.00172681	0.28252509	0.03333333	25	8	FALSE	FAP	11.6	25	0	0	0.76913558	mRNAup	FALSE	0	FAP	1180382	0.04738197
3205	3.51969898	8.08E-04	0.28411521	0.08333333	16	7	FALSE	SH3KBP1	68.4375	16	0	0	0.77093646		FALSE	0	SH3KBP1	881342	0.07955211
3207	3.16611332	0.01361287	0.31584466	0.00186884	109	7	FALSE	PLAUR	9.33027523	109	0	0	0.80308061	mRNAup	FALSE	0	PLAUR	10017498	0.01297933
3210	4.53939796	0	0.22029353	0	1	9	FALSE	RBM4	25	1	0	0	0.67823655		FALSE	0	RBM4	0	0
3212	3.97864099	1.42E-05	0.2513421	0	3	7	FALSE	THY1	30.66666667	3	0	0	0.72921446		FALSE	0	THY1	14304	0.34099617
3215	3.44920319	3.79E-04	0.28992203	0	7	7	FALSE	ERLIN2	180.2857143	7	0	0	0.77734516		FALSE	0	ERLIN2	803870	0.15740625
3218	4.4961266	1.11E-05	0.22241367	0	2	9	FALSE	TMEM109	16.5	2	0	0	0.68217031		FALSE	0	TMEM109	4772	0.5
3220	3.50818946	1.88E-04	0.28504732	0.0952381	7	7	FALSE	CORO1C	184.8571429	7	0	0	0.77198278		FALSE	0	CORO1C	411944	0.1771978
3222	4.53939796	0	0.22029353	0	1	9	FALSE	MSRB1	25	1	0	0	0.67823655		FALSE	0	MSRB1	0	0
3226	3.76305888	1.12E-04	0.26574126	0	5	7	FALSE	STOM	88	5	0	0	0.74881283		FALSE	0	STOM	340598	0.20963855
3228	3.18116423	3.27E-04	0.31435032	0.01666667	16	8	FALSE	FBXO32	35.125	16	0	0	0.80171234	mRNAup	FALSE	0	FBXO32	579564	0.07016871
3229	3.42098274	4.84E-04	0.29231366	0.06666667	10	7	FALSE	EIF3A	200.4	10	0	0	0.77991066		FALSE	0	EIF3A	1910814	0.13231788
3231	3.78640992	2.61E-05	0.26410241	0.1	5	7	FALSE	CDC34	67.6	5	0	0	0.74669001		FALSE	0	CDC34	50206	0.21474359
3233	3.95374059	4.33E-06	0.25292504	0	4	8	FALSE	SKP1	30.75	4	0	0	0.73147813		FALSE	0	SKP1	10200	0.27546296
3236	3.47277556	1.81E-04	0.28795411	0.06666667	6	8	FALSE	EIF3F	244.3333333	6	0	0	0.77520222		FALSE	0	EIF3F	554922	0.19446661
3238	3.58587871	2.69E-04	0.27887167	0	7	7	FALSE	UBE2D3	125.4285714	7	0	0	0.76492012		FALSE	0	UBE2D3	495444	0.15495463
3240	4.01139885	3.46E-06	0.2492896	0	3	7	FALSE	MYBPC3	43.66666667	3	0	0	0.72623647		FALSE	0	MYBPC3	8198	0.34688347
3242	4.04072598	8.80E-07	0.24748028	0	2	7	FALSE	MYOG	29	2	0	0	0.72357037		FALSE	0	MYOG	1686	0.50909091
3244	3.5603143	3.35E-04	0.28087408	0	12	7	FALSE	CDKN1A	71.58333333	12	0	0	0.76724415		FALSE	0	CDKN1A	663838	0.09461573
3246	3.05068614	7.90E-04	0.32779511	0.01811594	24	8	FALSE	DUSP1	58.125	24	0	0	0.81357399	mRNAup	FALSE	0	DUSP1	1095496	0.05019685
3248	3.02788845	0.00308695	0.33026316	0.04603175	36	7	FALSE	FCGR2A	39.86111111	36	0	0	0.8156465	mRNAup	FALSE	0	FCGR2A	2506734	0.04031339
3249	4.02777778	0	0.24827586	0	1	8	FALSE	NFYC	36	1	0	0	0.72474747		FALSE	0	NFYC	0	0
3253	3.91722001	4.28E-06	0.25528308	0	3	8	FALSE	EEA1	31.33333333	3	0	0	0.73479818		FALSE	0	EEA1	4286	0.34469697
3256	3.92994688	5.69E-05	0.25445637	0	4	8	FALSE	COL6A2	30.5	4	0	0	0.73364119		FALSE	0	COL6A2	36748	0.25877193
3258	3.9480965	2.35E-05	0.25328662	0.1	5	8	FALSE	CRP	19.6	5	0	0	0.73199123		FALSE	0	CRP	27282	0.2375
3260	3.62926073	1.91E-04	0.27553821	0	7	7	FALSE	APEX1	90	7	0	0	0.7609763		FALSE	0	APEX1	436734	0.15059222
3262	3.79471005	2.15E-05	0.26352475	0	4	7	FALSE	PROSC	57.5	4	0	0	0.74593545		FALSE	0	PROSC	38726	0.2627907
3264	3.99147853	2.10E-06	0.25053373	0	2	8	FALSE	BLVRB	31	2	0	0	0.72804741		FALSE	0	BLVRB	2498	0.50847458
3266	4.02257636	6.30E-07	0.2485969	0	2	8	FALSE	PPP3R1	20.5	2	0	0	0.72522033		FALSE	0	PPP3R1	628	0.51315789
3268	3.3436255	0.00129866	0.29907656	0.13903743	34	7	FALSE	CBL	76.05882353	34	0	0	0.78694314		FALSE	0	CBL	2987358	0.04961553
3270	4.02777778	0	0.24827586	0	1	8	FALSE	FAHD2A	36	1	0	0	0.72474747		FALSE	0	FAHD2A	0	0
3273	4.02777778	0	0.24827586	0	1	8	FALSE	PRTFDC1	36	1	0	0	0.72474747		FALSE	0	PRTFDC1	0	0
3275	3.44001771	0.00286133	0.29069618	0.0055371	43	7	FALSE	CD14	13.6744186	43	0	0	0.77818021	mRNAup	FALSE	0	CD14	2266912	0.02679264
3277	3.73893316	4.66E-05	0.26745597	0	4	7	FALSE	UBE2D2	110.5	4	0	0	0.75100608		FALSE	0	UBE2D2	120004	0.26838235
3279	4.02777778	0	0.24827586	0	1	8	FALSE	PLS1	36	1	0	0	0.72474747		FALSE	0	PLS1	0	0
3281	4.02777778	0	0.24827586	0	1	8	FALSE	FCGR2C	36	1	0	0	0.72474747		FALSE	0	FCGR2C	0	0
3283	3.68359894	7.90E-06	0.27147364	0.46666667	6	7	FALSE	GP6	86.83333333	6	0	0	0.75603646		FALSE	0	GP6	15912	0.21127332
3285	4.02777778	0	0.24827586	0	1	8	FALSE	ARPIN	36	1	0	0	0.72474747		FALSE	0	ARPIN	0	0
3287	4.02777778	0	0.24827586	0	1	8	FALSE	ADPRHL2	36	1	0	0	0.72474747		FALSE	0	ADPRHL2	0	0
3289	4.02777778	0	0.24827586	0	1	8	FALSE	AGFG1	36	1	0	0	0.72474747		FALSE	0	AGFG1	0	0
3293	3.32613988	7.80E-04	0.30064881	0.08695652	24	7	FALSE	FCGR2B	41.83333333	24	0	0	0.78853274	mRNAup	FALSE	0	FCGR2B	1092658	0.06787854
3294	3.82226649	1.91E-05	0.26162488	0	5	8	FALSE	GSK3A	51.8	5	0	0	0.74343032		FALSE	0	GSK3A	32792	0.21078838
3296	3.92242143	1.65E-06	0.25494456	0	2	8	FALSE	LY6E	110	2	0	0	0.73432532		FALSE	0	LY6E	2902	0.51415094
3298	3.65648517	6.63E-04	0.27348668	0.04444444	10	7	FALSE	SH2D1A	69.5	10	0	0	0.75850135		FALSE	0	SH2D1A	1661392	0.11965217
3303	3.8898849	1.68E-05	0.25707701	0.2	5	7	FALSE	APCS	23.6	5	0	0	0.73728319		FALSE	0	APCS	12956	0.22524272
3305	4.32602922	0	0.23115886	0	1	8	FALSE	MARS2	24	1	0	0	0.69763371		FALSE	0	MARS2	0	0
3308	3.8022355	1.77E-05	0.26300317	0.04761905	7	8	FALSE	INPPL1	33.28571429	7	0	0	0.74525132		FALSE	0	INPPL1	44426	0.16876388
3311	3.29426737	0.00132418	0.30355763	0.1006006	37	7	FALSE	SHC1	65.56756757	37	0	0	0.79143024		FALSE	0	SHC1	2402210	0.04587956
3316	3.38014608	8.41E-04	0.2958452	0.15204678	19	6	FALSE	FCGR3A	45.47368421	19	0	0	0.78362308	mRNAup	FALSE	0	FCGR3A	570836	0.06781528
3318	4.19831784	6.69E-06	0.23819064	0	2	7	FALSE	RNF40	29	2	0	0	0.70924383		FALSE	0	RNF40	6714	0.5
3321	3.92474546	3.43E-05	0.25479359	0.33333333	4	7	FALSE	FCGR3B	36.5	4	0	0	0.73411405		FALSE	0	FCGR3B	39728	0.26079137
3323	3.11930058	0.00289736	0.32058469	0.01538462	26	7	FALSE	GK	30.30769231	26	0	0	0.80733631	mRNAup	FALSE	0	GK	1496150	0.04107906
3326	4.06750775	9.96E-06	0.24585079	0	3	7	FALSE	ZBTB25	22.33333333	3	0	0	0.72113566		FALSE	0	ZBTB25	7948	0.33862434
3331	2.90139442	0.00988804	0.34466186	0.03851811	148	6	FALSE	SYK	25.64864865	148	0	0	0.82714596	mRNAup	FALSE	0	SYK	18017794	0.01632123
3334	4.76826029	1.42E-05	0.20972009	0	2	8	FALSE	FCN3	11.5	2	0	0	0.65743088	mRNAup	FALSE	0	FCN3	35388	0.5
3336	4.7976981	7.10E-06	0.20843329	0	3	9	FALSE	PTX3	10.66666667	3	0	0	0.65475472		FALSE	0	PTX3	9404	0.33333333
3338	4.71580345	2.32E-04	0.21205294	0	5	8	FALSE	FTCD	4	5	0	0	0.66219969	mRNAdown	FALSE	0	FTCD	534266	0.2
3340	4.4940239	3.36E-05	0.22251773	0	3	9	FALSE	MED4	21.66666667	3	0	0	0.68236146		FALSE	0	MED4	75824	0.33333333
3342	3.92087207	1.43E-04	0.2550453	0	3	7	FALSE	GRB14	45	3	0	0	0.73446618		FALSE	0	GRB14	326858	0.34645669
3344	3.34915892	9.60E-04	0.29858243	0.05492424	33	7	FALSE	FYB	24.45454545	33	0	0	0.7864401	mRNAup	FALSE	0	FYB	1277396	0.05640916
3346	3.68946436	7.96E-05	0.27104205	0.14285714	7	7	FALSE	EVL	83	7	0	0	0.75550324		FALSE	0	EVL	137112	0.17834002
3349	3.72465693	3.57E-04	0.2684811	0.04444444	10	8	FALSE	VASP	58.9	10	0	0	0.75230392		FALSE	0	VASP	366418	0.11043643
3352	3.13280212	0.00162468	0.31920305	0.13095238	49	6	FALSE	LCP2	42.24489796	49	0	0	0.8061089	mRNAup	FALSE	0	LCP2	2373902	0.03960453
3354	3.47698097	8.87E-04	0.28760583	0.04395604	14	7	FALSE	NCK2	87.07142857	14	0	0	0.77481991		FALSE	0	NCK2	1621468	0.08185511
3356	2.98362107	0.00743381	0.3351632	0.02329417	99	7	FALSE	WAS	22.31313131	99	0	0	0.81967081	mRNAup	FALSE	0	WAS	10189364	0.01948954
3358	3.18437362	3.26E-04	0.3140335	0	6	8	FALSE	G2E3	92.33333333	6	0	0	0.80142058	mRNAdown	FALSE	0	G2E3	362924	0.19027778
3359	3.72996901	4.55E-04	0.26809874	0.02777778	9	8	FALSE	LST1	25.55555556	9	0	0	0.751821	mRNAup	FALSE	0	LST1	366748	0.13040936
3363	3.13999557	0.00177373	0.31847179	0	17	8	FALSE	GAP43	41.35294118	17	0	0	0.80545495	mRNAdown	FALSE	0	GAP43	1602370	0.07067065
3365	4.1398849	0	0.24155261	0	1	9	FALSE	P02593	17	1	0	0	0.71455592		FALSE	0	P02593	0	0
3367	3.25553342	0.0022204	0.30716932	0.02380952	28	7	FALSE	CALM1	94.5	28	0	0	0.79495151		FALSE	0	CALM1	6621260	0.05086287
3369	3.09318282	0.00638483	0.32329159	0.00190259	73	8	FALSE	GAR1	14.08219178	73	0	0	0.80971065	mRNAup	FALSE	0	GAR1	8689952	0.01910651
3370	3.59085879	6.71E-05	0.27848491	0	5	7	FALSE	WDR77	135.8	5	0	0	0.76446738		FALSE	0	WDR77	204006	0.21812298
3372	3.49955733	9.67E-05	0.28575043	0	4	8	FALSE	CLNS1A	296.25	4	0	0	0.77276752		FALSE	0	CLNS1A	424262	0.2774906
3374	4.09307216	0	0.24431526	0	1	9	FALSE	RHOF	73	1	0	0	0.71881162		FALSE	0	RHOF	0	0
3376	3.23649845	0.00730498	0.30897589	7.84E-04	168	8	FALSE	MNDA	5.94642857	168	0	0	0.79668196	mRNAup	FALSE	0	MNDA	19737926	0.01276589
3378	3.90504648	4.17E-06	0.2560789	0	2	8	FALSE	TFB2M	61.5	2	0	0	0.73590487		FALSE	0	TFB2M	5302	0.50840336
3380	3.6377822	6.28E-05	0.27489276	0	4	8	FALSE	SRP14	191.75	4	0	0	0.76020162		FALSE	0	SRP14	171902	0.27846715
3382	3.97554228	6.00E-06	0.25153801	0	2	7	FALSE	OTUD4	71	2	0	0	0.72949616		FALSE	0	OTUD4	13780	0.50724638
3384	4.09307216	0	0.24431526	0	1	9	FALSE	KIF16B	73	1	0	0	0.71881162		FALSE	0	KIF16B	0	0
3386	3.99136786	1.22E-05	0.25054068	0	2	9	FALSE	RAP1B	69.5	2	0	0	0.72805747		FALSE	0	RAP1B	14402	0.50367647
3388	3.63512616	8.09E-05	0.27509362	0.13333333	6	7	FALSE	SMN2	118.3333333	6	0	0	0.76044308		FALSE	0	SMN2	214484	0.18703704
3390	3.79681275	6.55E-05	0.2633788	0.16666667	4	7	FALSE	DDX51	181	4	0	0	0.7457443		FALSE	0	DDX51	129378	0.31282496
3392	3.63545817	9.54E-05	0.27506849	0.06666667	6	7	FALSE	SMN1	113.6666667	6	0	0	0.76041289		FALSE	0	SMN1	236050	0.1828479
3395	4.09307216	0	0.24431526	0	1	9	FALSE	H7C2E6	73	1	0	0	0.71881162		FALSE	0	H7C2E6	0	0
3397	3.88302346	1.04E-04	0.25753128	0	4	8	FALSE	POLD1	79	4	0	0	0.73790696		FALSE	0	POLD1	116786	0.2516129
3399	4.09307216	0	0.24431526	0	1	9	FALSE	RIOK1	73	1	0	0	0.71881162		FALSE	0	RIOK1	0	0
3401	4.09307216	0	0.24431526	0	1	9	FALSE	NPAT	73	1	0	0	0.71881162		FALSE	0	NPAT	0	0
3403	3.79526339	3.16E-05	0.26348632	0.33333333	3	9	FALSE	NOP10	203.3333333	3	0	0	0.74588515		FALSE	0	NOP10	137472	0.34760274
3406	3.9105799	1.11E-05	0.25571655	0	2	8	FALSE	NLN	123.5	2	0	0	0.73540183		FALSE	0	NLN	27774	0.50829876
3408	3.81551571	1.48E-05	0.26208777	0.33333333	3	7	FALSE	NHP2	225.6666667	3	0	0	0.74404403		FALSE	0	NHP2	63736	0.41883519
3410	4.09307216	0	0.24431526	0	1	9	FALSE	SHQ1	73	1	0	0	0.71881162		FALSE	0	SHQ1	0	0
3412	4.04161133	1.18E-05	0.24742607	0	2	7	FALSE	KEAP1	53.5	2	0	0	0.72348988		FALSE	0	KEAP1	43632	0.50480769
3415	4.04526339	3.50E-06	0.24720269	0	2	9	FALSE	ASTE1	46	2	0	0	0.72315787		FALSE	0	ASTE1	4564	0.50561798
3419	3.63014608	1.78E-04	0.27547101	0	5	7	FALSE	TSR1	161.6	5	0	0	0.76089581		FALSE	0	TSR1	303382	0.21356383
3421	4.09307216	0	0.24431526	0	1	9	FALSE	WRAP53	73	1	0	0	0.71881162		FALSE	0	WRAP53	0	0
3423	4.09307216	0	0.24431526	0	1	9	FALSE	PUS7	73	1	0	0	0.71881162		FALSE	0	PUS7	0	0
3426	3.57757857	7.86E-05	0.27951867	0	4	8	FALSE	DDX20	211.5	4	0	0	0.76567468		FALSE	0	DDX20	171250	0.2595561
3428	4.05234617	1.02E-05	0.24677063	0	2	9	FALSE	MRPL50	53.5	2	0	0	0.72251398		FALSE	0	MRPL50	7784	0.50480769
3430	3.88025675	8.64E-06	0.25771491	0	3	9	FALSE	GEMIN2	63.33333333	3	0	0	0.73815848		FALSE	0	GEMIN2	23314	0.36666667
3434	3.75132802	3.66E-05	0.26657226	0	2	7	FALSE	TSNAX	158	2	0	0	0.74987927		FALSE	0	TSNAX	41806	0.50159744
3436	4.09307216	0	0.24431526	0	1	9	FALSE	LYST	73	1	0	0	0.71881162		FALSE	0	LYST	0	0
3438	3.98915449	4.13E-05	0.25067969	0	4	9	FALSE	HSPG2	57.25	4	0	0	0.72825868		FALSE	0	HSPG2	68936	0.25568182
3440	3.94732182	1.73E-05	0.25333632	0	3	7	FALSE	NSD1	60	3	0	0	0.73206165		FALSE	0	NSD1	44664	0.33908046
3442	4.09307216	0	0.24431526	0	1	9	FALSE	K7EJF0	73	1	0	0	0.71881162		FALSE	0	K7EJF0	0	0
3444	3.67065073	1.11E-04	0.27243126	0	4	7	FALSE	ESF1	215	4	0	0	0.75721357		FALSE	0	ESF1	343140	0.26918239
3446	3.62605135	1.15E-04	0.27578208	0	4	7	FALSE	EXOSC4	222	4	0	0	0.76126806		FALSE	0	EXOSC4	308486	0.26435407
3448	3.98904382	1.07E-05	0.25068664	0	2	8	FALSE	C2ORF44	58	2	0	0	0.72826874		FALSE	0	C2ORF44	7400	0.50442478
3450	3.55887561	4.16E-04	0.28098762	0	6	7	FALSE	CTR9	168	6	0	0	0.76737494		FALSE	0	CTR9	518144	0.17671958
3452	3.82791058	2.72E-04	0.26123912	0	7	8	FALSE	HMBOX1	74.42857143	7	0	0	0.74291722		FALSE	0	HMBOX1	302682	0.17318059
3454	3.98904382	1.07E-05	0.25068664	0	2	8	FALSE	H0Y9L7	58	2	0	0	0.72826874		FALSE	0	H0Y9L7	7400	0.50442478
3456	3.85358566	2.45E-05	0.25949858	0	3	8	FALSE	GEMIN4	110.6666667	3	0	0	0.74058312		FALSE	0	GEMIN4	51366	0.34378265
3459	3.98030102	7.22E-06	0.25123728	0	2	8	FALSE	LRRC1	70	2	0	0	0.72906354		FALSE	0	LRRC1	12562	0.50364964
3461	4.09307216	0	0.24431526	0	1	9	FALSE	TERC	73	1	0	0	0.71881162		FALSE	0	TERC	0	0
3463	3.72996901	1.43E-05	0.26809874	0.33333333	3	7	FALSE	RPL27	146	3	0	0	0.751821		FALSE	0	RPL27	40024	0.39263252
3465	4.09307216	0	0.24431526	0	1	9	FALSE	TTLL5	73	1	0	0	0.71881162		FALSE	0	TTLL5	0	0
3468	3.76217353	6.76E-05	0.26580379	0	4	7	FALSE	GEMIN5	106.75	4	0	0	0.74889332		FALSE	0	GEMIN5	130274	0.25982801
3471	3.90880921	1.45E-04	0.25583239	0	5	8	FALSE	STX3	50	5	0	0	0.7355628		FALSE	0	STX3	109816	0.21585903
3474	3.82979194	1.55E-05	0.26111079	0	2	9	FALSE	COPRS	221	2	0	0	0.74274619		FALSE	0	COPRS	52014	0.51044084
3476	3.40161576	0.00277767	0.29397794	0	30	7	FALSE	GCH1	12.06666667	30	0	0	0.78167129	mRNAup	FALSE	0	GCH1	2024808	0.03995187
3477	4.40150509	0	0.22719501	0	1	8	FALSE	CALML5	30	1	0	0	0.69077226		FALSE	0	CALML5	0	0
3479	3.8793714	1.88E-05	0.25777372	0	2	8	FALSE	PRKAR2A	163	2	0	0	0.73823896		FALSE	0	PRKAR2A	21760	0.5046729
3482	3.98295706	8.27E-06	0.25106974	0	2	8	FALSE	CAMKK1	66.5	2	0	0	0.72882209		FALSE	0	CAMKK1	8902	0.50775194
3484	3.66533865	1.67E-04	0.27282609	0	6	7	FALSE	PPM1B	124.3333333	6	0	0	0.75769649		FALSE	0	PPM1B	444314	0.17745803
3487	4.40150509	0	0.22719501	0	1	8	FALSE	CALML6	30	1	0	0	0.69077226	mRNAdown	FALSE	0	CALML6	0	0
3489	4.40150509	0	0.22719501	0	1	8	FALSE	RGS19	30	1	0	0	0.69077226		FALSE	0	RGS19	0	0
3491	3.72211155	7.14E-05	0.2686647	0.06666667	6	8	FALSE	MAP2K4	121.6666667	6	0	0	0.75253531		FALSE	0	MAP2K4	136894	0.19298246
3493	4.40150509	0	0.22719501	0	1	8	FALSE	RAB26	30	1	0	0	0.69077226		FALSE	0	RAB26	0	0
3496	3.00763612	0.0070462	0.33248703	0.00759494	80	7	FALSE	ATP1B1	19.55	80	0	0	0.81748763	mRNAdown	FALSE	0	ATP1B1	7376258	0.0179353
3498	3.73185038	3.75E-05	0.26796358	0	4	8	FALSE	MAPK10	124.25	4	0	0	0.75164997		FALSE	0	MAPK10	76074	0.26505376
3500	3.70694998	1.25E-04	0.26976355	0	3	8	FALSE	AHSA1	188	3	0	0	0.75391364		FALSE	0	AHSA1	123112	0.34186472
3502	3.78840195	8.72E-05	0.26396354	0	6	8	FALSE	GIT2	47.5	6	0	0	0.74650891		FALSE	0	GIT2	125818	0.17286245
3504	4.40150509	0	0.22719501	0	1	8	FALSE	PRKAR2B	30	1	0	0	0.69077226		FALSE	0	PRKAR2B	0	0
3506	3.95805666	5.40E-06	0.25264924	0	3	8	FALSE	MAPK12	29	3	0	0	0.73108576		FALSE	0	MAPK12	5308	0.35443038
3508	4.40150509	0	0.22719501	0	1	8	FALSE	MAP2K5	30	1	0	0	0.69077226		FALSE	0	MAP2K5	0	0
3511	4.40150509	0	0.22719501	0	1	8	FALSE	RLF	30	1	0	0	0.69077226		FALSE	0	RLF	0	0
3513	4.40150509	0	0.22719501	0	1	8	FALSE	CNRIP1	30	1	0	0	0.69077226		FALSE	0	CNRIP1	0	0
3515	3.854139	4.50E-05	0.25946132	0	4	8	FALSE	PACSIN3	73.5	4	0	0	0.74053282		FALSE	0	PACSIN3	41734	0.26654412
3517	3.19444444	0.00209723	0.31304348	0.03	25	7	FALSE	HSPA8	121.28	25	0	0	0.80050505		FALSE	0	HSPA8	5271546	0.05848837
3519	3.90061974	1.06E-04	0.25636952	0	4	7	FALSE	CSNK1G1	50.25	4	0	0	0.7363073		FALSE	0	CSNK1G1	52394	0.25518135
3521	4.354139	9.81E-06	0.22966653	0	2	8	FALSE	SP3	22	2	0	0	0.69507827		FALSE	0	SP3	10916	0.5
3523	3.04614874	0.00205441	0.32828338	0.04717854	47	7	FALSE	GHR	32.82978723	47	0	0	0.81398648	mRNAdown	FALSE	0	GHR	3166996	0.0376356
3526	3.40947322	9.76E-04	0.29330044	0.00735294	17	7	FALSE	FBXW11	89.88235294	17	0	0	0.78095698		FALSE	0	FBXW11	2219564	0.06804281
3528	4.04603807	0	0.24715536	0	1	8	FALSE	DUSP7	47	1	0	0	0.72308745		FALSE	0	DUSP7	0	0
3530	3.69510846	3.25E-04	0.27062805	0.2	6	7	FALSE	IGF1R	114.8333333	6	0	0	0.75499014		FALSE	0	IGF1R	1167968	0.19183445
3532	3.31396636	0.00159971	0.30175321	0.01848739	35	7	FALSE	PTPRB	20.34285714	35	0	0	0.78963942	mRNAup	FALSE	0	PTPRB	1882662	0.04958618
3534	4.04603807	0	0.24715536	0	1	8	FALSE	GH2	47	1	0	0	0.72308745		FALSE	0	GH2	0	0
3537	4.04603807	0	0.24715536	0	1	8	FALSE	PTPRH	47	1	0	0	0.72308745		FALSE	0	PTPRH	0	0
3539	3.75475874	3.31E-04	0.2663287	0.04761905	7	7	FALSE	PTPN1	48	7	0	0	0.74956739		FALSE	0	PTPN1	699112	0.16305419
3544	3.76062417	1.32E-04	0.2659133	0	4	8	FALSE	PTPN3	136.5	4	0	0	0.74903417		FALSE	0	PTPN3	241616	0.26057692
3546	3.97764498	3.11E-06	0.25140504	0	2	8	FALSE	PTPN13	60.5	2	0	0	0.729305		FALSE	0	PTPN13	8158	0.5173913
3548	3.62605135	1.35E-04	0.27578208	0	8	8	FALSE	STUB1	104.75	8	0	0	0.76126806		FALSE	0	STUB1	500512	0.14077341
3551	3.56363435	2.14E-04	0.2806124	0.17777778	10	7	FALSE	TYK2	88.5	10	0	0	0.76694233		FALSE	0	TYK2	274530	0.12492918
3553	3.45296591	8.48E-04	0.2896061	0.09090909	22	7	FALSE	JAK1	68.72727273	22	0	0	0.7770031		FALSE	0	JAK1	1124460	0.06558877
3557	2.90858787	0.00935779	0.34380945	0.03100775	129	7	FALSE	JAK2	25.47286822	129	0	0	0.82649201	mRNAup	FALSE	0	JAK2	16953210	0.01685813
3559	4.04603807	0	0.24715536	0	1	8	FALSE	PTPN9	47	1	0	0	0.72308745		FALSE	0	PTPN9	0	0
3562	3.15405046	0.00228279	0.31705263	0.00378788	33	8	FALSE	GINS3	19.27272727	33	0	0	0.80417723	mRNAup	FALSE	0	GINS3	2540840	0.03565755
3566	4.1539398	0	0.24073531	0	1	9	FALSE	TIPIN	33	1	0	0	0.7132782		FALSE	0	TIPIN	0	0
3570	4.11918991	0	0.24276618	0	1	8	FALSE	GPD1	26	1	0	0	0.71643728		FALSE	0	GPD1	0	0
3572	4.07315184	3.68E-06	0.24551012	0	3	8	FALSE	FOXS1	17.66666667	3	0	0	0.72062256		FALSE	0	FOXS1	3034	0.35460993
3574	3.77235502	4.16E-05	0.2650864	0	3	8	FALSE	IPO13	131	3	0	0	0.74796773		FALSE	0	IPO13	34992	0.33766234
3576	2.96646746	0.01139086	0.33710129	0.00567742	125	7	FALSE	NR4A1	16.52	125	0	0	0.82123023	mRNAup	FALSE	0	NR4A1	17899180	0.01416487
3578	4.11918991	0	0.24276618	0	1	8	FALSE	OPLAH	26	1	0	0	0.71643728	mRNAdown	FALSE	0	OPLAH	0	0
3580	3.81119965	6.76E-05	0.26238458	0.04761905	7	8	FALSE	RXRA	60.57142857	7	0	0	0.7444364		FALSE	0	RXRA	257060	0.1700487
3583	5.45208057	2.21E-04	0.18341622	0	2	10	FALSE	GLIPR1	1.5	2	0	0	0.5952654	mRNAup	FALSE	0	GLIPR1	177090	0.5
3584	4.45241257	4.43E-04	0.22459734	0	2	9	FALSE	CMTM6	15	2	0	0	0.68614431		FALSE	0	CMTM6	354176	0.5
3586	6.4519699	0	0.15499142	0	1	11	FALSE	ALOXE3	2	1	0	0	0.50436637		FALSE	0	ALOXE3	0	0
3588	3.20329792	3.55E-05	0.31217827	0	2	8	FALSE	GPR64	231.5	2	0	0	0.79970019	mRNAdown	FALSE	0	GPR64	37356	0.50217865
3589	3.9565073	1.88E-06	0.25274817	0	3	7	FALSE	PRKCH	27.33333333	3	0	0	0.73122661		FALSE	0	PRKCH	3068	0.36073059
3592	3.88014608	0	0.25772226	0	1	7	FALSE	GPR78	120	1	0	0	0.73816854	mRNAdown	FALSE	0	GPR78	0	0
3594	4.0434927	2.28E-04	0.24731095	0	5	8	FALSE	GRIK3	10.6	5	0	0	0.72331885	mRNAup	FALSE	0	GRIK3	650044	0.24615385
3596	3.16434263	2.55E-04	0.3160214	0	16	8	FALSE	GRM7	40.8125	16	0	0	0.80324158	mRNAdown	FALSE	0	GRM7	940742	0.08108452
3599	3.52091633	1.05E-04	0.28401697	0.06666667	10	7	FALSE	TUBA4A	118.3	10	0	0	0.77082579		FALSE	0	TUBA4A	542208	0.13318233
3602	3.85170429	3.20E-05	0.25962533	0	4	8	FALSE	CALM2	80.25	4	0	0	0.74075416		FALSE	0	CALM2	219372	0.25898693
3604	3.37206729	8.11E-04	0.29655399	0.04395604	14	7	FALSE	TUBA1A	129.1428571	14	0	0	0.78435752		FALSE	0	TUBA1A	1614240	0.09446835
3606	3.69920319	2.49E-05	0.27032849	0.06666667	6	8	FALSE	TUBA3C	150.6666667	6	0	0	0.75461789		FALSE	0	TUBA3C	166076	0.21645022
3611	3.87405932	7.50E-05	0.25812718	0	7	8	FALSE	PICK1	30.42857143	7	0	0	0.73872188		FALSE	0	PICK1	146436	0.15653495
3613	3.80810093	2.92E-04	0.26259808	0.02222222	10	7	FALSE	GNAQ	34.3	10	0	0	0.7447181		FALSE	0	GNAQ	603124	0.11279461
3615	3.88866755	6.72E-06	0.25715749	0.16666667	4	8	FALSE	GZMH	24.5	4	0	0	0.73739386	mRNAup	FALSE	0	GZMH	7906	0.27586207
3617	3.7892873	4.33E-05	0.26390187	0	5	8	FALSE	SSB	71.4	5	0	0	0.74642843		FALSE	0	SSB	65834	0.20766962
3619	3.68559097	2.50E-05	0.27132691	0	3	7	FALSE	RCC1	146.3333333	3	0	0	0.75585537		FALSE	0	RCC1	39436	0.33720031
3621	3.53585657	1.95E-04	0.2828169	0.04761905	7	7	FALSE	RAN	125	7	0	0	0.76946758		FALSE	0	RAN	572636	0.15893314
3623	3.33477202	8.79E-04	0.29987057	0.03921569	18	7	FALSE	XRCC5	119.5555556	18	0	0	0.787748		FALSE	0	XRCC5	2580070	0.07710852
3629	3.70307658	2.77E-05	0.27004572	0.16666667	4	7	FALSE	PHF14	184.5	4	0	0	0.75426577		FALSE	0	PHF14	199062	0.30114566
3631	3.63446215	3.75E-05	0.27514388	0	4	7	FALSE	DEK	136.5	4	0	0	0.76050344		FALSE	0	DEK	90302	0.26208897
3633	3.74479858	7.95E-06	0.26703706	0	2	7	FALSE	ERICH2	100	2	0	0	0.75047286		FALSE	0	ERICH2	13516	0.50769231
3635	3.58621071	7.05E-05	0.27884586	0	8	7	FALSE	TOP1	91.5	8	0	0	0.76488994		FALSE	0	TOP1	184126	0.15313029
3637	3.45506861	5.37E-04	0.28942985	0.02205882	17	7	FALSE	HSPA4	70.70588235	17	0	0	0.77681194		FALSE	0	HSPA4	1186580	0.07405795
3641	3.87859672	0	0.25782521	1	2	7	FALSE	HIST3H2BB	46	2	0	0	0.73830939		FALSE	0	HIST3H2BB	0	0.53488372
3643	3.11974325	9.01E-04	0.3205392	0.11111111	9	6	FALSE	HAPLN1	82.66666667	9	0	0	0.80729607	mRNAdown	FALSE	0	HAPLN1	1214930	0.13048072
3648	3.58897742	3.77E-04	0.2786309	0.04545455	12	7	FALSE	HBG2	21.08333333	12	0	0	0.76463842	mRNAup	FALSE	0	HBG2	710296	0.10057471
3650	3.52611775	1.54E-04	0.28359802	0.1	5	8	FALSE	NAP1L1	215	5	0	0	0.77035293		FALSE	0	NAP1L1	454886	0.21989744
3652	3.60878707	4.96E-04	0.27710141	0	10	7	FALSE	CLU	75.5	10	0	0	0.76283754		FALSE	0	CLU	618606	0.11270802
3655	3.6272687	3.73E-05	0.27568953	0.16666667	4	7	FALSE	SLC4A1	128.5	4	0	0	0.76115739		FALSE	0	SLC4A1	65924	0.28571429
3658	3.66201859	8.16E-04	0.27307344	0.05147059	17	7	FALSE	APOA1	41.70588235	17	0	0	0.75799831		FALSE	0	APOA1	1095584	0.06872549
3660	2.82525454	0.03773523	0.35395041	0.00291468	338	7	FALSE	HLA-B	10.76923077	338	0	0	0.83406777	mRNAup	FALSE	0	HLA-B	56326846	0.00550985
3663	3.38047809	9.03E-04	0.29581615	0.02564103	13	8	FALSE	SYNCRIP	142.5384615	13	0	0	0.7835929		FALSE	0	SYNCRIP	1735926	0.0974359
3665	2.96790615	0.0069052	0.33693788	0.00723654	67	6	FALSE	CTSD	27.3880597	67	0	0	0.82109944	mRNAup	FALSE	0	CTSD	8182300	0.02125735
3667	4.01549358	1.81E-06	0.24903539	0	3	8	FALSE	SPINK7	16.66666667	3	0	0	0.72586422		FALSE	0	SPINK7	1986	0.34057971
3669	3.52390438	2.84E-04	0.28377614	0.01282051	13	7	FALSE	PTEN	71.53846154	13	0	0	0.77055415		FALSE	0	PTEN	566622	0.09578903
3672	3.9565073	4.44E-05	0.25274817	0	4	7	FALSE	HBZ	38.25	4	0	0	0.73122661		FALSE	0	HBZ	114184	0.25689655
3675	4.58886676	0	0.21791873	0	1	8	FALSE	HBG1	12	1	0	0	0.67373939		FALSE	0	HBG1	0	0
3679	3.94676848	0	0.25337184	0	1	7	FALSE	WNT2	100	1	0	0	0.73211196		FALSE	0	WNT2	0	0
3682	3.5957282	2.25E-04	0.27810778	0.10606061	12	7	FALSE	PIK3R3	72.33333333	12	0	0	0.76402471		FALSE	0	PIK3R3	318038	0.10769615
3685	3.53707393	2.73E-04	0.28271956	0.07272727	11	7	FALSE	ERBB3	91.09090909	11	0	0	0.76935692		FALSE	0	ERBB3	445278	0.11164668
3688	3.94676848	0	0.25337184	0	1	7	FALSE	SPRR2A	100	1	0	0	0.73211196		FALSE	0	SPRR2A	0	0
3690	3.5294378	1.58E-04	0.28333124	0.31111111	10	7	FALSE	BCR	117.4	10	0	0	0.77005111		FALSE	0	BCR	440750	0.13549133
3699	3.70086321	7.50E-06	0.27020723	0.1	5	7	FALSE	ABI1	96.6	5	0	0	0.75446698		FALSE	0	ABI1	22606	0.26229508
3701	3.61077911	2.12E-05	0.27694854	0	2	7	FALSE	RUFY1	378	2	0	0	0.76265644		FALSE	0	RUFY1	74828	0.50740242
3706	3.80666224	7.85E-06	0.26269733	0	3	7	FALSE	OLIG1	84.66666667	3	0	0	0.74484889		FALSE	0	OLIG1	13666	0.36695906
3708	3.94676848	0	0.25337184	0	1	7	FALSE	NGEF	100	1	0	0	0.73211196		FALSE	0	NGEF	0	0
3711	2.9856131	0.00471389	0.33493958	0.0801364	69	7	FALSE	PLCG2	34.65217391	69	0	0	0.81948972	mRNAup	FALSE	0	PLCG2	5455378	0.02849198
3713	3.67175741	5.30E-04	0.27234915	0.01282051	13	7	FALSE	NOTCH2NL	42.76923077	13	0	0	0.75711296		FALSE	0	NOTCH2NL	936986	0.09818051
3715	3.90172643	8.80E-07	0.2562968	0	2	7	FALSE	RAPGEF1	60	2	0	0	0.73620669		FALSE	0	RAPGEF1	934	0.5042735
3717	3.61077911	2.12E-05	0.27694854	0	2	7	FALSE	AGK	378	2	0	0	0.76265644		FALSE	0	AGK	74828	0.50740242
3722	3.94676848	0	0.25337184	0	1	7	FALSE	FRS3	100	1	0	0	0.73211196		FALSE	0	FRS3	0	0
3728	3.46569278	3.38E-04	0.2885426	0.10833333	16	7	FALSE	PTK2	76.125	16	0	0	0.77584611		FALSE	0	PTK2	478658	0.09298219
3731	3.9249668	5.53E-06	0.25477923	0	2	7	FALSE	LETMD1	70	2	0	0	0.73409393		FALSE	0	LETMD1	12846	0.50735294
3733	3.60436034	1.96E-05	0.27744174	0.44444444	9	7	FALSE	DOK1	96.88888889	9	0	0	0.76323997		FALSE	0	DOK1	56836	0.16733832
3735	3.2752324	0.00108853	0.30532184	0.06153846	26	7	FALSE	HCLS1	32.5	26	0	0	0.79316069	mRNAup	FALSE	0	HCLS1	1034712	0.05436767
3737	3.62394865	1.52E-04	0.2759421	0.2	5	7	FALSE	SH2D4A	107.6	5	0	0	0.76145921		FALSE	0	SH2D4A	133948	0.21397206
3739	3.60391766	2.80E-04	0.27747582	0	9	7	FALSE	CFTR	63.77777778	9	0	0	0.76328021		FALSE	0	CFTR	402674	0.11647083
3742	3.84960159	1.68E-06	0.25976714	0.66666667	3	7	FALSE	WIPF1	75	3	0	0	0.74094531		FALSE	0	WIPF1	1742	0.36945813
3745	4.27512174	0	0.23391147	0	1	8	FALSE	SSBP3	26	1	0	0	0.70226166		FALSE	0	SSBP3	0	0
3748	3.041722	0.0011	0.32876114	0.14285714	22	7	FALSE	CD79A	61.22727273	22	0	0	0.81438891	mRNAup	FALSE	0	CD79A	1315240	0.06290459
3750	4.00254537	1.91E-06	0.24984102	0	2	8	FALSE	TRIM29	27.5	2	0	0	0.72704133		FALSE	0	TRIM29	1434	0.5
3752	3.76637893	2.97E-05	0.26550701	0	3	7	FALSE	LZTR1	168.6666667	3	0	0	0.74851101		FALSE	0	LZTR1	49290	0.33940621
3757	4.27512174	0	0.23391147	0	1	8	FALSE	BLZF1	26	1	0	0	0.70226166		FALSE	0	BLZF1	0	0
3759	2.95008853	0.01634324	0.33897288	0.00312272	174	7	FALSE	HIF1A	15.27586207	174	0	0	0.82271922	mRNAup	FALSE	0	HIF1A	39485962	0.01381279
3760	3.52589641	4.99E-05	0.28361582	0	3	8	FALSE	EGLN3	374.6666667	3	0	0	0.77037305		FALSE	0	EGLN3	320220	0.36742052
3763	3.94997787	0	0.25316598	0	1	8	FALSE	EGLN1	174	1	0	0	0.73182019		FALSE	0	EGLN1	0	0
3766	3.94997787	0	0.25316598	0	1	8	FALSE	ZNF197	174	1	0	0	0.73182019		FALSE	0	ZNF197	0	0
3768	3.06463037	0.01037228	0.32630363	0.00228781	94	8	FALSE	SAT1	12.81914894	94	0	0	0.81230633	mRNAup	FALSE	0	SAT1	12147854	0.01567823
3776	3.81850376	4.91E-06	0.26188268	0	2	8	FALSE	NES	137	2	0	0	0.74377239		FALSE	0	NES	21988	0.51908397
3780	3.8769367	8.38E-06	0.2579356	0	3	8	FALSE	MED12	114.6666667	3	0	0	0.7384603		FALSE	0	MED12	44482	0.37637969
3782	3.94997787	0	0.25316598	0	1	8	FALSE	MED15	174	1	0	0	0.73182019		FALSE	0	MED15	0	0
3786	2.96857016	0.02105199	0.33686251	0.00190416	138	6	FALSE	ZFP36	12.57246377	138	0	0	0.82103908	mRNAup	FALSE	0	ZFP36	16926042	0.01005645
3788	3.08178398	0.00245871	0.32448738	0.02083333	33	7	FALSE	XBP1	31.96969697	33	0	0	0.81074691	mRNAup	FALSE	0	XBP1	2112074	0.03654085
3791	3.92220009	0	0.25495895	1	2	8	FALSE	SSX4B	103.5	2	0	0	0.73434545		FALSE	0	SSX4B	0	0.5201005
3793	3.4102479	2.47E-04	0.29323381	0.03571429	8	8	FALSE	RUVBL2	211.875	8	0	0	0.78088655		FALSE	0	RUVBL2	872636	0.15444404
3795	3.38191678	6.93E-04	0.2956903	0.05147059	17	7	FALSE	ARRB1	105.1176471	17	0	0	0.78346211		FALSE	0	ARRB1	1728402	0.07453494
3797	3.91589199	2.87E-06	0.25536966	0	2	8	FALSE	MED14	123.5	2	0	0	0.73491891		FALSE	0	MED14	13866	0.52801724
3801	3.28452855	0.00182188	0.3044577	0.00362319	24	7	FALSE	CUL2	88.08333333	24	0	0	0.79231559		FALSE	0	CUL2	4741044	0.05715847
3803	3.50077468	3.99E-04	0.28565106	0.01282051	13	7	FALSE	SMARCA4	91.92307692	13	0	0	0.77265685		FALSE	0	SMARCA4	1372770	0.10233362
3805	3.94532979	6.83E-06	0.25346424	0	2	8	FALSE	HEXIM1	93	2	0	0	0.73224275		FALSE	0	HEXIM1	28590	0.5
3807	3.67817618	7.52E-05	0.27187387	0	6	7	FALSE	WWOX	99	6	0	0	0.75652944		FALSE	0	WWOX	226078	0.18560606
3809	3.88612218	2.92E-05	0.25732593	0	5	8	FALSE	MAFG	68.8	5	0	0	0.73762526		FALSE	0	MAFG	251816	0.24565217
3811	3.75365206	7.01E-05	0.26640722	0	5	8	FALSE	COMMD1	92.4	5	0	0	0.74966799		FALSE	0	COMMD1	128806	0.21658768
3813	3.84749889	8.09E-06	0.25990911	0	2	7	FALSE	RUNX2	200	2	0	0	0.74113646		FALSE	0	RUNX2	41022	0.52925532
3816	3.94721116	2.50E-06	0.25334343	0	2	8	FALSE	KDM3A	92	2	0	0	0.73207171		FALSE	0	KDM3A	5948	0.50555556
3818	3.76173085	2.04E-04	0.26583507	0.06666667	6	8	FALSE	MTA1	98	6	0	0	0.74893356		FALSE	0	MTA1	276124	0.17859327
3822	3.94997787	0	0.25316598	0	1	8	FALSE	MED13	174	1	0	0	0.73182019		FALSE	0	MED13	0	0
3824	3.521027	8.81E-05	0.28400805	0.16666667	4	7	FALSE	LAMP2	210	4	0	0	0.77081573		FALSE	0	LAMP2	266530	0.26721939
3827	3.93658699	9.44E-06	0.25402716	0	2	8	FALSE	FDX1	103	2	0	0	0.73303755		FALSE	0	FDX1	58938	0.51515152
3832	3.67065073	2.32E-04	0.27243126	0	7	7	FALSE	USP8	114.1428571	7	0	0	0.75721357		FALSE	0	USP8	510104	0.15758058
3834	3.37394865	6.32E-04	0.29638862	0	11	7	FALSE	FHL2	151	11	0	0	0.78418649		FALSE	0	FHL2	1955834	0.10344828
3836	3.47853032	5.84E-04	0.28747773	0.01515152	12	7	FALSE	HDAC4	105.8333333	12	0	0	0.77467906		FALSE	0	HDAC4	1124230	0.10047847
3839	3.57846392	1.64E-04	0.27944951	0	11	7	FALSE	NEDD8	91.90909091	11	0	0	0.76559419		FALSE	0	NEDD8	621428	0.12251899
3841	3.54282869	1.59E-04	0.28226033	0	6	8	FALSE	PTGES3	176.1666667	6	0	0	0.76883376		FALSE	0	PTGES3	505468	0.18438596
3843	3.74391324	6.19E-05	0.26710021	0	5	7	FALSE	SMARCA2	88.4	5	0	0	0.75055334		FALSE	0	SMARCA2	254936	0.22352941
3847	3.92220009	0	0.25495895	1	2	8	FALSE	SAT2	134	2	0	0	0.73434545		FALSE	0	SAT2	0	0.51737452
3851	3.8622178	6.85E-05	0.25891859	0	5	7	FALSE	BANP	57.2	5	0	0	0.73979838		FALSE	0	BANP	191764	0.20970149
3854	3.49977866	4.91E-04	0.28573236	0.01818182	11	7	FALSE	NOTCH1	96.81818182	11	0	0	0.77274739		FALSE	0	NOTCH1	684050	0.10278373
3856	3.5543382	2.44E-04	0.28134633	0.02777778	9	7	FALSE	HDAC5	109.8888889	9	0	0	0.76778744		FALSE	0	HDAC5	679062	0.12958564
3858	3.70252324	2.37E-04	0.27008608	0.1	5	7	FALSE	DNAJB1	103.4	5	0	0	0.75431607		FALSE	0	DNAJB1	164140	0.21065574
3860	3.6230633	1.85E-05	0.27600953	0	2	8	FALSE	MED23	415	2	0	0	0.7615397		FALSE	0	MED23	103114	0.5175
3862	3.90725985	7.43E-06	0.25593384	0	3	8	FALSE	ESRRA	89.33333333	3	0	0	0.73570365		FALSE	0	ESRRA	26542	0.36351166
3864	3.75929615	3.29E-04	0.26600724	0	4	8	FALSE	FBP1	95.5	4	0	0	0.7491549		FALSE	0	FBP1	759666	0.26694915
3866	3.59760956	3.01E-05	0.27796235	0	3	8	FALSE	CBX4	296	3	0	0	0.76385368		FALSE	0	CBX4	135050	0.35160906
3869	3.62737937	1.48E-04	0.27568112	0.08333333	9	7	FALSE	NCOA1	127.7777778	9	0	0	0.76114733		FALSE	0	NCOA1	715478	0.14082259
3871	3.84838424	7.88E-06	0.25984931	0	3	8	FALSE	DAP3	115.3333333	3	0	0	0.74105598		FALSE	0	DAP3	42828	0.3836689
3874	3.14652501	0.00327218	0.31781092	0.00750751	37	7	FALSE	HSP90AA1	76.27027027	37	0	0	0.80486136		FALSE	0	HSP90AA1	7789724	0.03820732
3877	3.55533422	1.25E-04	0.28126751	0	4	8	FALSE	RPTOR	255.5	4	0	0	0.76769689		FALSE	0	RPTOR	313012	0.26621339
3879	3.94289509	2.01E-05	0.25362075	0	3	8	FALSE	ARNTL	68	3	0	0	0.73246408		FALSE	0	ARNTL	58698	0.34358974
3882	3.51106684	2.06E-04	0.28481372	0	6	8	FALSE	PGK1	214.3333333	6	0	0	0.7717212		FALSE	0	PGK1	663458	0.1826484
3884	3.91378929	1.32E-05	0.25550686	0	3	8	FALSE	WWTR1	78.33333333	3	0	0	0.73511006		FALSE	0	WWTR1	34494	0.34834835
3887	3.92408145	3.22E-05	0.25483671	0	3	8	FALSE	F12	69.66666667	3	0	0	0.73417441		FALSE	0	F12	29426	0.33495935
3890	3.85801239	5.56E-06	0.25920083	0	2	7	FALSE	TCEB2	129.5	2	0	0	0.74018069		FALSE	0	TCEB2	17714	0.514
3893	3.71115538	1.21E-04	0.26945786	0	4	7	FALSE	SENP3	207.5	4	0	0	0.75353133		FALSE	0	SENP3	395260	0.27570093
3895	3.66810536	3.10E-04	0.2726203	0.02777778	9	7	FALSE	SIN3A	74.33333333	9	0	0	0.75744497		FALSE	0	SIN3A	755788	0.13205665
3900	3.55123949	1.49E-04	0.28159182	0.1	5	7	FALSE	TCEB1	219	5	0	0	0.76806914		FALSE	0	TCEB1	488012	0.22082912
3902	3.90371846	1.85E-05	0.25616601	0	3	8	FALSE	MAFK	85.33333333	3	0	0	0.73602559		FALSE	0	MAFK	147790	0.36194564
3904	3.79537406	1.16E-05	0.26347864	0	3	7	FALSE	CDK8	134	3	0	0	0.74587509		FALSE	0	CDK8	62056	0.37677054
3907	3.94997787	0	0.25316598	0	1	8	FALSE	MED13L	174	1	0	0	0.73182019		FALSE	0	MED13L	0	0
3909	3.34583887	9.36E-04	0.29887871	0.02614379	18	7	FALSE	VHL	87.88888889	18	0	0	0.78674192		FALSE	0	VHL	2381254	0.0691583
3911	3.72288623	8.76E-05	0.2686088	0	3	7	FALSE	CBX6	116	3	0	0	0.75246489		FALSE	0	CBX6	75528	0.33923304
3917	3.64984506	4.88E-05	0.27398423	0	15	8	FALSE	HIST1H4C	21.86666667	15	0	0	0.75910499	mRNAup	FALSE	0	HIST1H4C	325282	0.13911111
3919	4.35458167	1.85E-04	0.22964318	0	3	8	FALSE	HIST1H4G	6	3	0	0	0.69503803	mRNAup	FALSE	0	HIST1H4G	306132	0.33333333
3920	5.26870297	1.89E-06	0.18980003	0	2	9	FALSE	AGTRAP	3	2	0	0	0.61193609		FALSE	0	AGTRAP	670	0.5
3922	3.36752988	0.0022339	0.29695356	0	48	8	FALSE	HIST2H4A	12.08333333	48	0	0	0.78477001	mRNAup	FALSE	0	HIST2H4A	8449158	0.04312581
3923	4.36741921	0	0.22896817	0	1	9	FALSE	BRDT	48	1	0	0	0.69387098		FALSE	0	BRDT	0	0
3926	3.82724657	1.59E-05	0.26128445	0	4	7	FALSE	TBL1XR1	81.75	4	0	0	0.74297758		FALSE	0	TBL1XR1	104564	0.28135889
3929	3.74424524	2.49E-05	0.26707652	0	3	7	FALSE	PTMA	150.6666667	3	0	0	0.75052316		FALSE	0	PTMA	106408	0.34887335
3932	4.36741921	0	0.22896817	0	1	9	FALSE	RAD51L1	48	1	0	0	0.69387098		FALSE	0	RAD51L1	0	0
3934	3.78995131	1.25E-05	0.26385563	0	3	8	FALSE	UHRF1	151.6666667	3	0	0	0.74636806		FALSE	0	UHRF1	81986	0.35958632
3937	3.86575919	1.11E-05	0.2586814	0	3	7	FALSE	TBL1X	92	3	0	0	0.73947644		FALSE	0	TBL1X	74462	0.36111111
3939	3.6293714	6.24E-04	0.27552981	0.12087912	14	8	FALSE	HLA-DMB	11.5	14	0	0	0.76096624	mRNAup	FALSE	0	HLA-DMB	455524	0.09090909
3940	3.89884905	2.41E-05	0.25648595	0.38095238	7	8	FALSE	HLA-DRB1	28.14285714	7	0	0	0.73646827		FALSE	0	HLA-DRB1	21486	0.17283951
3943	4.09926959	4.46E-04	0.2439459	0	3	9	FALSE	TEAD1	16.33333333	3	0	0	0.71824822		FALSE	0	TEAD1	378144	0.33333333
3945	3.62682603	1.13E-04	0.27572318	0	3	7	FALSE	AP3M1	256	3	0	0	0.76119763		FALSE	0	AP3M1	135488	0.33685601
3947	4.62926073	0	0.21601721	0	1	9	FALSE	PHOSPHO1	14	1	0	0	0.67006721		FALSE	0	PHOSPHO1	0	0
3950	3.78264719	5.83E-05	0.26436513	0	3	7	FALSE	DHRS7	92.66666667	3	0	0	0.74703207		FALSE	0	DHRS7	80660	0.33577534
3952	3.17197875	4.97E-04	0.31526062	0.21818182	11	8	FALSE	HLA-DMA	51.45454545	11	0	0	0.80254739	mRNAup	FALSE	0	HLA-DMA	402444	0.09861622
3954	3.56850376	0.00276568	0.28022949	0	31	7	FALSE	HLA-DPB1	12.41935484	31	0	0	0.76649966	mRNAup	FALSE	0	HLA-DPB1	1830944	0.03429236
3955	4.38579017	3.82E-06	0.22800908	0	2	8	FALSE	GID8	34	2	0	0	0.69220089		FALSE	0	GID8	4448	0.55
3957	3.92729084	5.76E-05	0.25462846	0	4	8	FALSE	GID4	43	4	0	0	0.73388265		FALSE	0	GID4	64476	0.27096774
3960	4.56839309	0	0.21889535	0	1	8	FALSE	YPEL5	31	1	0	0	0.67560063		FALSE	0	YPEL5	0	0
3962	3.83156264	5.60E-05	0.26099012	0	3	8	FALSE	RTN4	78.66666667	3	0	0	0.74258521		FALSE	0	RTN4	39076	0.34064327
3965	3.62981408	3.72E-04	0.2754962	0	5	8	FALSE	RANBP10	148.4	5	0	0	0.76092599		FALSE	0	RANBP10	543148	0.20415512
3967	4.56839309	0	0.21889535	0	1	8	FALSE	LYRM4	31	1	0	0	0.67560063		FALSE	0	LYRM4	0	0
3969	4.28939796	7.65E-06	0.23313295	0	3	8	FALSE	RMND5A	26.33333333	3	0	0	0.70096382		FALSE	0	RMND5A	11962	0.39583333
3971	4.20374059	8.86E-05	0.23788338	0	4	8	FALSE	MKLN1	28.25	4	0	0	0.70875086		FALSE	0	MKLN1	52850	0.28092784
3974	4.04260735	2.34E-05	0.24736511	0	2	8	FALSE	NFS1	49	2	0	0	0.72339933		FALSE	0	NFS1	9268	0.5
3977	3.92729084	5.76E-05	0.25462846	0	4	8	FALSE	ARMC8	43	4	0	0	0.73388265		FALSE	0	ARMC8	64476	0.27096774
3979	3.09517486	0.00339878	0.32308352	0.00891266	34	7	FALSE	HLA-DQA1	25.70588235	34	0	0	0.80952956	mRNAup	FALSE	0	HLA-DQA1	3151512	0.0336703
3980	4.09506419	0	0.24419642	0	1	8	FALSE	MFSD8	34	1	0	0	0.71863053		FALSE	0	MFSD8	0	0
3983	3.61387782	4.57E-04	0.27671107	0.01666667	16	7	FALSE	DDX19B	38.875	16	0	0	0.76237474		FALSE	0	DDX19B	599368	0.07460861
3985	4.03640992	8.12E-05	0.24774491	0	3	8	FALSE	TMEM214	32.66666667	3	0	0	0.72396273		FALSE	0	TMEM214	172332	0.33333333
3990	3.05301018	0.00905824	0.32754558	0.00421053	76	6	FALSE	SH3GL2	15.26315789	76	0	0	0.81336271	mRNAdown	FALSE	0	SH3GL2	8250064	0.01894461
3992	4.00287738	6.27E-06	0.24982029	0	2	8	FALSE	EFNB1	54	2	0	0	0.72701115		FALSE	0	EFNB1	8174	0.50961538
3994	4.09506419	0	0.24419642	0	1	8	FALSE	SLC38A9	34	1	0	0	0.71863053		FALSE	0	SLC38A9	0	0
3996	4.0333112	2.44E-05	0.24793524	0	3	8	FALSE	ST7	33.66666667	3	0	0	0.72424444		FALSE	0	ST7	15792	0.34385965
3998	4.04581673	1.01E-05	0.24716888	0	2	8	FALSE	CUX1	50.5	2	0	0	0.72310757		FALSE	0	CUX1	10142	0.50510204
4001	4.08986277	0	0.24450698	1	2	8	FALSE	HCRT	20.5	2	0	0	0.71910338		FALSE	0	HCRT	0	0.55405405
4003	4.09506419	0	0.24419642	0	1	8	FALSE	GALT	34	1	0	0	0.71863053		FALSE	0	GALT	0	0
4005	4.08012395	8.45E-06	0.24509059	0	2	8	FALSE	SLC27A6	22.5	2	0	0	0.71998873		FALSE	0	SLC27A6	18532	0.5
4008	3.95927402	1.13E-04	0.25257156	0	3	8	FALSE	SMPD2	28	3	0	0	0.73097509		FALSE	0	SMPD2	157466	0.33333333
4010	3.5669544	2.59E-04	0.28035121	0.07142857	8	7	FALSE	HLA-A	114.125	8	0	0	0.76664051		FALSE	0	HLA-A	399596	0.13290398
4012	4.05876494	7.53E-06	0.24638037	0	2	8	FALSE	TMEM219	45	2	0	0	0.72193046		FALSE	0	TMEM219	9786	0.51764706
4014	3.66002656	6.18E-05	0.27322206	0	7	7	FALSE	C1orf103	57.85714286	7	0	0	0.7581794		FALSE	0	C1orf103	134672	0.16106839
4016	4.09506419	0	0.24419642	0	1	8	FALSE	SLC30A9	34	1	0	0	0.71863053		FALSE	0	SLC30A9	0	0
4018	3.95163789	1.68E-05	0.25305962	0	3	8	FALSE	ATP6V0A2	36.66666667	3	0	0	0.73166928		FALSE	0	ATP6V0A2	13200	0.3496732
4020	3.82270916	6.08E-05	0.26159458	0	4	7	FALSE	ATP6V0A1	44.25	4	0	0	0.74339008		FALSE	0	ATP6V0A1	46030	0.25898204
4022	4.09506419	0	0.24419642	0	1	8	FALSE	TMEM246	34	1	0	0	0.71863053		FALSE	0	TMEM246	0	0
4024	4.05544489	3.05E-05	0.24658207	0	3	8	FALSE	KCNJ8	32	3	0	0	0.72223228		FALSE	0	KCNJ8	52498	0.34444444
4026	3.18348827	1.42E-04	0.31412084	0.28571429	7	8	FALSE	HLA-DQB1	76	7	0	0	0.80150107	mRNAup	FALSE	0	HLA-DQB1	166852	0.152
4028	3.95916335	1.17E-06	0.25257862	0.33333333	3	7	FALSE	INS	26	3	0	0	0.73098515		FALSE	0	INS	2212	0.36150235
4031	3.15947322	0.00311589	0.31650846	0.01333333	25	7	FALSE	HOOK1	24.68	25	0	0	0.80368425	mRNAup	FALSE	0	HOOK1	2453108	0.04574713
4032	4.15936255	0	0.24042146	0	1	8	FALSE	ZNF785	25	1	0	0	0.71278522		FALSE	0	ZNF785	0	0
4034	4.08233732	0	0.24495771	1	2	7	FALSE	FAM160A2	36	2	0	0	0.71978752		FALSE	0	FAM160A2	0	0.53731343
4036	4.00132802	3.34E-05	0.24991703	0.16666667	4	7	FALSE	HOOK2	38	4	0	0	0.727152		FALSE	0	HOOK2	49354	0.27173913
4038	4.15936255	0	0.24042146	0	1	8	FALSE	VPS16	25	1	0	0	0.71278522		FALSE	0	VPS16	0	0
4041	4.07204515	2.40E-05	0.24557684	0.33333333	3	7	FALSE	HOOK3	27.66666667	3	0	0	0.72072317		FALSE	0	HOOK3	55110	0.35497835
4043	4.15936255	0	0.24042146	0	1	8	FALSE	VPS41	25	1	0	0	0.71278522		FALSE	0	VPS41	0	0
4045	4.15936255	0	0.24042146	0	1	8	FALSE	VPS39	25	1	0	0	0.71278522		FALSE	0	VPS39	0	0
4047	4.15936255	0	0.24042146	0	1	8	FALSE	VPS18	25	1	0	0	0.71278522		FALSE	0	VPS18	0	0
4049	4.08233732	0	0.24495771	1	2	7	FALSE	AKTIP	36	2	0	0	0.71978752		FALSE	0	AKTIP	0	0.53731343
4052	4.15936255	0	0.24042146	0	1	8	FALSE	ZNF250	25	1	0	0	0.71278522		FALSE	0	ZNF250	0	0
4054	3.88014608	0	0.25772226	0	1	7	FALSE	HPGD	120	1	0	0	0.73816854	mRNAup	FALSE	0	HPGD	0	0
4056	4.67031873	2.63E-04	0.21411815	0	4	9	FALSE	HPGDS	2.5	4	0	0	0.66633466	mRNAdown	FALSE	0	HPGDS	606686	0.25
4057	5.67020806	0	0.17636037	0	1	10	FALSE	ABHD17A	4	1	0	0	0.57543563		FALSE	0	ABHD17A	0	0
4059	3.6977645	4.85E-04	0.27043366	0.16666667	4	8	FALSE	ARRDC3	187.25	4	0	0	0.75474868		FALSE	0	ARRDC3	1239154	0.27104499
4061	4.50055334	2.48E-05	0.2221949	0	3	8	FALSE	HK3	9	3	0	0	0.68176788		FALSE	0	HK3	26480	0.33333333
4063	4.39630367	2.28E-04	0.22746381	0	4	8	FALSE	HPSE	8.25	4	0	0	0.69124512	mRNAup	FALSE	0	HPSE	678952	0.25
4065	5.39619301	0	0.18531583	0	1	9	FALSE	FAM134A	4	1	0	0	0.60034609		FALSE	0	FAM134A	0	0
4067	3.90991589	1.04E-04	0.25575998	0	4	8	FALSE	NIPSNAP1	48	4	0	0	0.73546219		FALSE	0	NIPSNAP1	137572	0.25405405
4069	3.88213811	0.0018097	0.25759001	0.00952381	15	8	FALSE	HSFY2	2.46666667	15	0	0	0.73798744	mRNAup	FALSE	0	HSFY2	811376	0.07619048
4070	4.88202745	0	0.20483293	0	1	9	FALSE	TBX6	15	1	0	0	0.64708841		FALSE	0	TBX6	0	0
4072	4.88202745	0	0.20483293	0	1	9	FALSE	GCM2	15	1	0	0	0.64708841		FALSE	0	GCM2	0	0
4074	4.88202745	0	0.20483293	0	1	9	FALSE	E2F7	15	1	0	0	0.64708841		FALSE	0	E2F7	0	0
4076	3.46480744	7.55E-04	0.28861633	0.06666667	6	7	FALSE	HNRNPF	256.3333333	6	0	0	0.7759266		FALSE	0	HNRNPF	1127790	0.19442332
4078	3.5876494	4.03E-04	0.27873404	0.06666667	6	7	FALSE	NDUFS1	119.8333333	6	0	0	0.76475915		FALSE	0	NDUFS1	369850	0.17759563
4080	4.88202745	0	0.20483293	0	1	9	FALSE	QRICH1	15	1	0	0	0.64708841		FALSE	0	QRICH1	0	0
4082	4.13590084	1.74E-05	0.24178529	0	2	9	FALSE	RABEP1	16	2	0	0	0.71491811		FALSE	0	RABEP1	7544	0.5
4084	4.88202745	0	0.20483293	0	1	9	FALSE	SOX15	15	1	0	0	0.64708841		FALSE	0	SOX15	0	0
4086	4.88202745	0	0.20483293	0	1	9	FALSE	RBM47	15	1	0	0	0.64708841		FALSE	0	RBM47	0	0
4088	4.88202745	0	0.20483293	0	1	9	FALSE	B7ZLP7	15	1	0	0	0.64708841		FALSE	0	B7ZLP7	0	0
4090	3.72952634	2.38E-04	0.26813056	0	5	7	FALSE	PPM1A	120.2	5	0	0	0.75186124		FALSE	0	PPM1A	288090	0.21022928
4092	4.11808322	1.88E-05	0.24283142	0	2	9	FALSE	SV2B	31	2	0	0	0.71653789		FALSE	0	SV2B	11208	0.5
4095	2.85303232	0.05265782	0.35050427	0.00138142	436	6	FALSE	IFI16	7.95183486	436	0	0	0.83154252	mRNAup	FALSE	0	IFI16	115904080	0.00553074
4097	3.70750332	4.64E-05	0.26972329	0.16666667	4	7	FALSE	CBX3	144	4	0	0	0.75386333		FALSE	0	CBX3	64910	0.26090909
4099	3.85292165	0	0.2595433	0	1	7	FALSE	NUP133	436	1	0	0	0.74064349		FALSE	0	NUP133	0	0
4102	3.75697211	6.46E-06	0.26617179	0	2	7	FALSE	XAB2	259.5	2	0	0	0.74936617		FALSE	0	XAB2	25198	0.51803607
4104	3.46347942	3.34E-04	0.28872699	0	6	7	FALSE	RAE1	262.3333333	6	0	0	0.77604733		FALSE	0	RAE1	1055992	0.1868001
4107	3.82879593	1.65E-06	0.26117871	0	2	7	FALSE	RBM34	302	2	0	0	0.74283673		FALSE	0	RBM34	26786	0.63102725
4110	3.72598495	6.00E-05	0.26838541	0.16666667	4	7	FALSE	ACIN1	188	4	0	0	0.75218319		FALSE	0	ACIN1	253550	0.27017291
4112	3.79515272	2.19E-04	0.26349401	0	2	7	FALSE	TLDC1	246.5	2	0	0	0.74589521		FALSE	0	TLDC1	91704	0.5
4115	3.82901726	1.31E-05	0.26116362	0	2	7	FALSE	USP10	254.5	2	0	0	0.74281661		FALSE	0	USP10	36950	0.51006036
4118	3.82879593	1.65E-06	0.26117871	0	2	7	FALSE	DHX33	302	2	0	0	0.74283673		FALSE	0	DHX33	26786	0.63102725
4120	2.95717131	0.00579564	0.338161	0.00682839	106	7	FALSE	TOP2A	23.29245283	106	0	0	0.82207534	mRNAup	FALSE	0	TOP2A	16351030	0.01902661
4122	3.85292165	0	0.2595433	0	1	7	FALSE	FXR1	436	1	0	0	0.74064349		FALSE	0	FXR1	0	0
4126	3.59451085	1.37E-04	0.27820197	0	5	7	FALSE	STAU1	189.6	5	0	0	0.76413538		FALSE	0	STAU1	303496	0.24589309
4129	3.62616202	3.57E-04	0.27577367	0.0952381	7	7	FALSE	CBX5	126.8571429	7	0	0	0.761258		FALSE	0	CBX5	781428	0.1621126
4134	3.85292165	0	0.2595433	0	1	7	FALSE	TMEM209	436	1	0	0	0.74064349		FALSE	0	TMEM209	0	0
4136	3.79072598	2.28E-05	0.26380171	0	2	7	FALSE	ASCC3	317	2	0	0	0.74629764		FALSE	0	ASCC3	143148	0.52491694
4139	3.80965029	2.42E-05	0.26249129	0	3	7	FALSE	YTHDC2	210.6666667	3	0	0	0.74457725		FALSE	0	YTHDC2	52626	0.41933333
4142	3.85292165	0	0.2595433	0	1	7	FALSE	RSL24D1	436	1	0	0	0.74064349		FALSE	0	RSL24D1	0	0
4145	3.46425409	4.31E-04	0.28866243	0	7	7	FALSE	MAP1B	224.1428571	7	0	0	0.7759769		FALSE	0	MAP1B	1449620	0.1638347
4147	3.82879593	1.65E-06	0.26117871	0	2	7	FALSE	NGDN	302	2	0	0	0.74283673		FALSE	0	NGDN	26786	0.63102725
4149	3.72233289	1.28E-04	0.26864873	0	4	7	FALSE	EXOSC6	195.75	4	0	0	0.75251519		FALSE	0	EXOSC6	229492	0.30669291
4151	3.6605799	3.17E-05	0.27318076	0	2	7	FALSE	SEC13	387	2	0	0	0.7581291		FALSE	0	SEC13	167650	0.51812081
4154	3.54271802	2.44E-04	0.28226915	0.06666667	6	7	FALSE	RBM25	217	6	0	0	0.76884382		FALSE	0	RBM25	878888	0.19212552
4157	3.68116423	1.68E-04	0.27165319	0	4	7	FALSE	NMNAT1	169.25	4	0	0	0.7562578		FALSE	0	NMNAT1	516694	0.25924499
4159	3.78917663	2.81E-05	0.26390958	0	2	7	FALSE	WTAP	266	2	0	0	0.74643849		FALSE	0	WTAP	58226	0.50766284
4161	3.85292165	0	0.2595433	0	1	7	FALSE	NUP37	436	1	0	0	0.74064349		FALSE	0	NUP37	0	0
4163	3.84727756	2.98E-05	0.25992406	0	2	7	FALSE	ZC3H14	230	2	0	0	0.74115659		FALSE	0	ZC3H14	31134	0.50219298
4165	3.56463037	4.59E-05	0.280534	0	3	7	FALSE	ZCCHC3	420	3	0	0	0.76685178		FALSE	0	ZCCHC3	423874	0.39416745
4168	3.82879593	1.65E-06	0.26117871	0	2	7	FALSE	MRTO4	302	2	0	0	0.74283673		FALSE	0	MRTO4	26786	0.63102725
4172	3.71181939	2.91E-05	0.26940966	0.2	5	7	FALSE	HP1BP3	169.4	5	0	0	0.75347096		FALSE	0	HP1BP3	109498	0.26283048
4174	3.72554228	1.27E-04	0.2684173	0	4	7	FALSE	FTSJ3	224	4	0	0	0.75222343		FALSE	0	FTSJ3	382080	0.30631868
4176	3.85292165	0	0.2595433	0	1	7	FALSE	RBM15	436	1	0	0	0.74064349		FALSE	0	RBM15	0	0
4178	3.70318725	3.60E-05	0.27003765	0.2	5	7	FALSE	CBX1	129	5	0	0	0.7542557		FALSE	0	CBX1	91540	0.21686341
4181	3.77855246	4.03E-05	0.26465161	0	2	7	FALSE	DNTTIP2	266	2	0	0	0.74740432		FALSE	0	DNTTIP2	67726	0.50572519
4183	3.82879593	1.65E-06	0.26117871	0	2	7	FALSE	UTP18	302	2	0	0	0.74283673		FALSE	0	UTP18	26786	0.63102725
4185	3.82879593	1.65E-06	0.26117871	0	2	7	FALSE	CEBPZ	302	2	0	0	0.74283673		FALSE	0	CEBPZ	26786	0.63102725
4187	3.85292165	0	0.2595433	0	1	7	FALSE	GSDMA	436	1	0	0	0.74064349		FALSE	0	GSDMA	0	0
4189	3.58089863	1.83E-04	0.27925951	0.0952381	7	7	FALSE	SSRP1	131.8571429	7	0	0	0.76537285		FALSE	0	SSRP1	260536	0.16597435
4191	3.58078796	2.76E-05	0.27926814	0	2	7	FALSE	NUP160	546	2	0	0	0.76538291		FALSE	0	NUP160	263536	0.53170732
4193	3.79902612	1.03E-04	0.26322536	0	3	7	FALSE	TNKS1BP1	168.3333333	3	0	0	0.74554308		FALSE	0	TNKS1BP1	83748	0.33466667
4195	3.57990261	3.36E-05	0.27933721	0.33333333	3	7	FALSE	NUP107	368.3333333	3	0	0	0.7654634		FALSE	0	NUP107	270834	0.35658915
4197	3.51449757	1.96E-04	0.28453569	0	4	7	FALSE	UTP15	339.5	4	0	0	0.77140931		FALSE	0	UTP15	629640	0.29486063
4199	3.75099602	4.24E-04	0.26659586	0.1	5	7	FALSE	DDX54	160.4	5	0	0	0.74990945		FALSE	0	DDX54	1308798	0.25774194
4201	3.73395308	5.85E-05	0.26781269	0.2	5	7	FALSE	PDCD11	197.4	5	0	0	0.75145881		FALSE	0	PDCD11	314966	0.25751634
4204	3.73262506	5.53E-05	0.26790797	0	3	7	FALSE	PTPLAD1	255	3	0	0	0.75157954		FALSE	0	PTPLAD1	272958	0.35825106
4207	3.85292165	0	0.2595433	0	1	7	FALSE	BRD1	436	1	0	0	0.74064349		FALSE	0	BRD1	0	0
4209	3.46978752	1.40E-04	0.28820209	0	4	7	FALSE	NSUN2	395.75	4	0	0	0.77547386		FALSE	0	NSUN2	972104	0.28940616
4211	3.82879593	1.65E-06	0.26117871	0	2	7	FALSE	NIFK	302	2	0	0	0.74283673		FALSE	0	NIFK	26786	0.63102725
4213	3.09727756	5.21E-04	0.32286419	0.05128205	13	7	FALSE	POM121C	75.30769231	13	0	0	0.8093384	mRNAdown	FALSE	0	POM121C	533192	0.08308377
4215	3.82879593	1.65E-06	0.26117871	0	2	7	FALSE	RBM28	302	2	0	0	0.74283673		FALSE	0	RBM28	26786	0.63102725
4217	3.38944223	0.00100999	0.29503379	0.03809524	15	7	FALSE	HUWE1	118.4666667	15	0	0	0.78277798		FALSE	0	HUWE1	2012664	0.08322748
4220	3.82879593	1.65E-06	0.26117871	0	2	7	FALSE	DDX52	302	2	0	0	0.74283673		FALSE	0	DDX52	26786	0.63102725
4222	3.54083665	2.75E-04	0.28241913	0	5	7	FALSE	EXOSC10	267	5	0	0	0.76901485		FALSE	0	EXOSC10	885062	0.23686554
4225	3.50376273	3.92E-04	0.28540745	0.1	5	7	FALSE	RANBP1	291.4	5	0	0	0.77238521		FALSE	0	RANBP1	1014996	0.22595183
4227	3.82879593	1.65E-06	0.26117871	0	2	7	FALSE	WDR75	302	2	0	0	0.74283673		FALSE	0	WDR75	26786	0.63102725
4229	3.82879593	1.65E-06	0.26117871	0	2	7	FALSE	NSA2	302	2	0	0	0.74283673		FALSE	0	NSA2	26786	0.63102725
4233	3.85292165	0	0.2595433	0	1	7	FALSE	PDAP1	436	1	0	0	0.74064349		FALSE	0	PDAP1	0	0
4235	3.82901726	0	0.26116362	1	2	7	FALSE	UTP3	276.5	2	0	0	0.74281661		FALSE	0	UTP3	0	0.5368932
4237	3.85292165	0	0.2595433	0	1	7	FALSE	IMP4	436	1	0	0	0.74064349		FALSE	0	IMP4	0	0
4240	3.79858344	9.62E-05	0.26325603	0	5	7	FALSE	RRP1B	129.6	5	0	0	0.74558332		FALSE	0	RRP1B	247202	0.25068226
4245	3.32337317	7.30E-04	0.3008991	0.04444444	10	7	FALSE	PABPC1	233.1	10	0	0	0.78878426		FALSE	0	PABPC1	2403132	0.13323782
4247	3.60469234	1.47E-04	0.27741619	0	6	7	FALSE	CARM1	161.1666667	6	0	0	0.76320979		FALSE	0	CARM1	460556	0.18097928
4249	3.61664453	1.50E-04	0.27649939	0	5	7	FALSE	CEP170	185.8	5	0	0	0.76212322		FALSE	0	CEP170	436700	0.20976163
4251	3.82879593	1.65E-06	0.26117871	0	2	7	FALSE	WDR3	302	2	0	0	0.74283673		FALSE	0	WDR3	26786	0.63102725
4253	3.57348384	6.15E-05	0.27983896	0	3	7	FALSE	FMR1	370	3	0	0	0.76604692		FALSE	0	FMR1	310444	0.35583414
4255	3.74391324	9.25E-05	0.26710021	0	4	7	FALSE	SMARCA1	167	4	0	0	0.75055334		FALSE	0	SMARCA1	187652	0.27347611
4257	3.55090748	2.98E-04	0.28161815	0.11111111	10	7	FALSE	SMARCA5	134.3	10	0	0	0.76809932		FALSE	0	SMARCA5	853062	0.13250988
4259	3.82879593	1.65E-06	0.26117871	0	2	7	FALSE	SPATS2L	302	2	0	0	0.74283673		FALSE	0	SPATS2L	26786	0.63102725
4261	3.85292165	0	0.2595433	0	1	7	FALSE	NUP88	436	1	0	0	0.74064349		FALSE	0	NUP88	0	0
4263	3.67651616	2.66E-04	0.27199663	0	4	7	FALSE	EDC4	202.5	4	0	0	0.75668035		FALSE	0	EDC4	462498	0.2644357
4266	3.82879593	1.65E-06	0.26117871	0	2	7	FALSE	CCDC86	302	2	0	0	0.74283673		FALSE	0	CCDC86	26786	0.63102725
4268	3.82879593	1.65E-06	0.26117871	0	2	7	FALSE	NOL9	302	2	0	0	0.74283673		FALSE	0	NOL9	26786	0.63102725
4270	3.53452855	1.37E-04	0.28292316	0	5	7	FALSE	COPA	298.2	5	0	0	0.76958831		FALSE	0	COPA	882882	0.25293617
4272	3.79072598	2.28E-05	0.26380171	0	2	7	FALSE	PRRC2A	317	2	0	0	0.74629764		FALSE	0	PRRC2A	143148	0.52491694
4274	3.12018592	0.00171178	0.32049372	0.06190476	21	7	FALSE	HNRNPU	183.1904762	21	0	0	0.80725583		FALSE	0	HNRNPU	6435786	0.07359307
4276	3.83156264	5.24E-05	0.26099012	0	2	7	FALSE	NUP35	249.5	2	0	0	0.74258521		FALSE	0	NUP35	75890	0.5040568
4278	3.78474989	7.08E-05	0.26421825	0	4	7	FALSE	SP100	137.25	4	0	0	0.74684092		FALSE	0	SP100	112944	0.2546729
4280	3.00088535	0.00384084	0.33323499	0.01580334	68	6	FALSE	S100A8	27.94117647	68	0	0	0.81810133	mRNAup	FALSE	0	S100A8	7683558	0.0237204
4282	3.69864985	1.10E-04	0.27036893	0	4	7	FALSE	NCBP1	173.75	4	0	0	0.7546682		FALSE	0	NCBP1	405668	0.26253799
4284	3.85292165	0	0.2595433	0	1	7	FALSE	NDC1	436	1	0	0	0.74064349		FALSE	0	NDC1	0	0
4286	3.75121735	7.12E-05	0.26658013	0	3	7	FALSE	XRN1	195.3333333	3	0	0	0.74988933		FALSE	0	XRN1	109572	0.33974359
4288	3.85292165	0	0.2595433	0	1	7	FALSE	UTP6	436	1	0	0	0.74064349		FALSE	0	UTP6	0	0
4291	3.82879593	1.65E-06	0.26117871	0	2	7	FALSE	PAK1IP1	302	2	0	0	0.74283673		FALSE	0	PAK1IP1	26786	0.63102725
4293	3.58078796	2.76E-05	0.27926814	0	2	7	FALSE	TRIM56	546	2	0	0	0.76538291		FALSE	0	TRIM56	263536	0.53170732
4295	3.64265162	9.78E-05	0.27452529	0	3	7	FALSE	BTF3	269	3	0	0	0.75975894		FALSE	0	BTF3	223562	0.34536082
4297	3.63468349	1.29E-04	0.27512712	0	5	7	FALSE	PDIA4	172.8	5	0	0	0.76048332		FALSE	0	PDIA4	304736	0.21053922
4299	3.33598938	3.19E-04	0.29976115	0.04761905	7	7	FALSE	HIST1H1C	319.2857143	7	0	0	0.78763733		FALSE	0	HIST1H1C	1985104	0.18435847
4301	3.85292165	0	0.2595433	0	1	7	FALSE	APOBEC3B	436	1	0	0	0.74064349		FALSE	0	APOBEC3B	0	0
4304	3.67662683	7.44E-05	0.27198844	0.1	5	7	FALSE	NUP153	158.6	5	0	0	0.75667029		FALSE	0	NUP153	269064	0.22036262
4306	3.39143426	6.28E-04	0.2948605	0.05454545	11	7	FALSE	USP7	177.0909091	11	0	0	0.78259689		FALSE	0	USP7	2141104	0.10973541
4308	3.82879593	1.65E-06	0.26117871	0	2	7	FALSE	NKRF	302	2	0	0	0.74283673		FALSE	0	NKRF	26786	0.63102725
4310	3.72941567	5.08E-05	0.26813852	0.33333333	3	7	FALSE	EIF3K	229.6666667	3	0	0	0.7518713		FALSE	0	EIF3K	87328	0.34590246
4313	3.76339088	5.47E-05	0.26571781	0	4	7	FALSE	YTHDC1	147	4	0	0	0.74878265		FALSE	0	YTHDC1	97510	0.25795053
4315	3.54471005	9.50E-05	0.28211052	0	4	7	FALSE	GTPBP4	345.5	4	0	0	0.76866272		FALSE	0	GTPBP4	662110	0.30352423
4318	3.82879593	1.65E-06	0.26117871	0	2	7	FALSE	LARP4B	302	2	0	0	0.74283673		FALSE	0	LARP4B	26786	0.63102725
4320	3.54238601	1.24E-04	0.2822956	0.1	5	7	FALSE	EXOSC2	268.8	5	0	0	0.768874		FALSE	0	EXOSC2	547298	0.23882458
4322	3.80865427	2.21E-05	0.26255993	0	3	7	FALSE	EXOSC7	215	3	0	0	0.74466779		FALSE	0	EXOSC7	70778	0.42043222
4324	3.60900841	2.90E-04	0.27708442	0	5	7	FALSE	DOCK7	189.8	5	0	0	0.76281742		FALSE	0	DOCK7	523258	0.21430193
4326	3.66611332	1.13E-04	0.27276844	0	4	7	FALSE	BOP1	255	4	0	0	0.75762606		FALSE	0	BOP1	412216	0.29777257
4329	3.76803896	4.50E-05	0.26539004	0	3	7	FALSE	USP36	226	3	0	0	0.74836009		FALSE	0	USP36	95634	0.41360294
4331	3.79913679	1.55E-05	0.26321769	0	3	7	FALSE	TEX10	242	3	0	0	0.74553302		FALSE	0	TEX10	132340	0.4365942
4334	3.82879593	1.65E-06	0.26117871	0	2	7	FALSE	EXOSC3	302	2	0	0	0.74283673		FALSE	0	EXOSC3	26786	0.63102725
4336	3.72653829	6.33E-05	0.26834556	0	4	7	FALSE	PHIP	181.25	4	0	0	0.75213288		FALSE	0	PHIP	226484	0.27603369
4338	3.82879593	1.65E-06	0.26117871	0	2	7	FALSE	NOL6	302	2	0	0	0.74283673		FALSE	0	NOL6	26786	0.63102725
4340	3.76482957	1.93E-05	0.26561627	0.16666667	4	7	FALSE	GLYR1	183.5	4	0	0	0.74865186		FALSE	0	GLYR1	56190	0.31937173
4342	3.85292165	0	0.2595433	0	1	7	FALSE	NUP188	436	1	0	0	0.74064349		FALSE	0	NUP188	0	0
4344	3.56983178	2.17E-04	0.28012524	0.13333333	6	7	FALSE	SART3	189.3333333	6	0	0	0.76637893		FALSE	0	SART3	480898	0.18940154
4346	3.7019699	4.15E-05	0.27012645	0	3	7	FALSE	H2AFY2	286.3333333	3	0	0	0.75436637		FALSE	0	H2AFY2	280248	0.37249782
4348	3.82879593	1.65E-06	0.26117871	0	2	7	FALSE	DDX10	302	2	0	0	0.74283673		FALSE	0	DDX10	26786	0.63102725
4350	3.75697211	6.46E-06	0.26617179	0	2	7	FALSE	WDR18	259.5	2	0	0	0.74936617		FALSE	0	WDR18	25198	0.51803607
4352	3.37704737	6.05E-04	0.29611666	0.10989011	14	7	FALSE	CDC42	107.2857143	14	0	0	0.78390478		FALSE	0	CDC42	1147894	0.08301009
4355	3.51637893	3.89E-04	0.28438346	0.04761905	7	7	FALSE	C1QBP	211.2857143	7	0	0	0.77123828		FALSE	0	C1QBP	1085626	0.17050318
4357	3.82879593	1.65E-06	0.26117871	0	2	7	FALSE	PPAN	302	2	0	0	0.74283673		FALSE	0	PPAN	26786	0.63102725
4359	3.66389996	4.84E-04	0.27293322	0	6	7	FALSE	CNOT1	139.5	6	0	0	0.75782728		FALSE	0	CNOT1	867432	0.17779204
4361	3.85292165	0	0.2595433	0	1	7	FALSE	FCF1	436	1	0	0	0.74064349		FALSE	0	FCF1	0	0
4364	3.79758743	6.77E-05	0.26332508	0	2	7	FALSE	PCID2	264.5	2	0	0	0.74567387		FALSE	0	PCID2	79276	0.5028626
4366	3.85292165	0	0.2595433	0	1	7	FALSE	SNRNP27	436	1	0	0	0.74064349		FALSE	0	SNRNP27	0	0
4368	3.7689243	3.64E-05	0.2653277	0	3	7	FALSE	URB1	267.3333333	3	0	0	0.74827961		FALSE	0	URB1	227712	0.41356108
4370	3.62583001	2.94E-04	0.27579892	0.04761905	7	7	FALSE	TBL3	179.2857143	7	0	0	0.76128818		FALSE	0	TBL3	738392	0.17946877
4374	3.65703851	1.97E-04	0.2734453	0	5	7	FALSE	NUP62	162	5	0	0	0.75845104		FALSE	0	NUP62	408240	0.21727395
4376	3.80699425	2.59E-06	0.26267442	0.33333333	3	7	FALSE	RRP1	240.3333333	3	0	0	0.7448187		FALSE	0	RRP1	33230	0.43399638
4378	3.83875609	2.18E-05	0.26050105	0	2	7	FALSE	RFC2	234.5	2	0	0	0.74193126		FALSE	0	RFC2	27028	0.50215054
4380	3.82281983	1.24E-04	0.26158701	0	3	7	FALSE	TMEM43	168.3333333	3	0	0	0.74338002		FALSE	0	TMEM43	301218	0.33533734
4382	3.72576361	1.35E-04	0.26840135	0	4	7	FALSE	PPHLN1	162.5	4	0	0	0.75220331		FALSE	0	PPHLN1	192460	0.25553797
4384	3.69234174	3.97E-05	0.27083084	0.16666667	4	7	FALSE	SUN2	190.75	4	0	0	0.75524166		FALSE	0	SUN2	124586	0.27492775
4386	3.58399734	1.20E-04	0.27901806	0.14285714	8	7	FALSE	TOP2B	144.375	8	0	0	0.76509115		FALSE	0	TOP2B	392190	0.15631779
4388	3.55599823	4.27E-04	0.28121499	0	6	7	FALSE	G3BP1	188.5	6	0	0	0.76763652		FALSE	0	G3BP1	1386690	0.18274854
4390	3.80677291	4.78E-05	0.26268969	0	3	7	FALSE	SNX6	175.6666667	3	0	0	0.74483883		FALSE	0	SNX6	81254	0.33915858
4392	3.85292165	0	0.2595433	0	1	7	FALSE	RNF213	436	1	0	0	0.74064349		FALSE	0	RNF213	0	0
4394	3.82879593	1.65E-06	0.26117871	0	2	7	FALSE	KRI1	302	2	0	0	0.74283673		FALSE	0	KRI1	26786	0.63102725
4396	3.76726428	1.00E-04	0.26544461	0.1	5	7	FALSE	POP1	158.4	5	0	0	0.74843052		FALSE	0	POP1	185794	0.25784314
4400	3.82879593	1.65E-06	0.26117871	0	2	7	FALSE	REXO4	302	2	0	0	0.74283673		FALSE	0	REXO4	26786	0.63102725
4402	3.72620629	9.92E-05	0.26836947	0	4	7	FALSE	PNN	183	4	0	0	0.75216306		FALSE	0	PNN	257530	0.26074499
4404	3.85292165	0	0.2595433	0	1	7	FALSE	MCM3AP	436	1	0	0	0.74064349		FALSE	0	MCM3AP	0	0
4406	3.82171315	1.78E-05	0.26166276	0	3	7	FALSE	WDR36	206.3333333	3	0	0	0.74348062		FALSE	0	WDR36	45030	0.41904762
4408	3.85292165	0	0.2595433	0	1	7	FALSE	NEMF	436	1	0	0	0.74064349		FALSE	0	NEMF	0	0
4410	3.71513944	2.75E-04	0.2691689	0.14285714	7	7	FALSE	CKAP5	108.7142857	7	0	0	0.75316914		FALSE	0	CKAP5	357744	0.15316226
4412	3.73849048	4.34E-05	0.26748764	0	4	7	FALSE	E2F1	142.25	4	0	0	0.75104632		FALSE	0	E2F1	94714	0.25681818
4414	3.66345728	6.88E-05	0.2729662	0.33333333	3	7	FALSE	NUP93	282.3333333	3	0	0	0.75786752		FALSE	0	NUP93	216978	0.35651075
4416	3.82879593	1.65E-06	0.26117871	0	2	7	FALSE	CCDC137	302	2	0	0	0.74283673		FALSE	0	CCDC137	26786	0.63102725
4418	3.82879593	1.65E-06	0.26117871	0	2	7	FALSE	RBM19	302	2	0	0	0.74283673		FALSE	0	RBM19	26786	0.63102725
4420	3.80345286	8.90E-06	0.26291899	0	2	7	FALSE	ID3	251.5	2	0	0	0.74514065		FALSE	0	ID3	40006	0.50811359
4422	3.80976096	4.01E-05	0.26248366	0	3	7	FALSE	WDR12	217	3	0	0	0.74456719		FALSE	0	WDR12	84102	0.41779497
4424	3.45982736	2.63E-04	0.28903176	0	6	7	FALSE	PELP1	284.1666667	6	0	0	0.77637933		FALSE	0	PELP1	1348168	0.20821078
4426	3.7187915	2.23E-04	0.26890456	0	3	7	FALSE	NUP214	220.3333333	3	0	0	0.75283714		FALSE	0	NUP214	211294	0.33900052
4428	3.82879593	1.65E-06	0.26117871	0	2	7	FALSE	NOC2L	302	2	0	0	0.74283673		FALSE	0	NOC2L	26786	0.63102725
4431	3.8313413	9.17E-06	0.2610052	0	2	7	FALSE	LEMD2	272.5	2	0	0	0.74260534		FALSE	0	LEMD2	69098	0.53550296
4433	3.82669323	1.84E-05	0.26132223	0	3	7	FALSE	LARP7	205.3333333	3	0	0	0.74302789		FALSE	0	LARP7	69678	0.41871585
4435	3.85292165	0	0.2595433	0	1	7	FALSE	LSM12	436	1	0	0	0.74064349		FALSE	0	LSM12	0	0
4437	3.70075255	2.18E-05	0.27021531	0.16666667	4	7	FALSE	SMU1	168	4	0	0	0.75447704		FALSE	0	SMU1	76000	0.2768595
4440	3.56463037	4.59E-05	0.280534	0	3	7	FALSE	NOL11	420	3	0	0	0.76685178		FALSE	0	NOL11	423874	0.39416745
4442	3.82879593	1.65E-06	0.26117871	0	2	7	FALSE	MAK16	302	2	0	0	0.74283673		FALSE	0	MAK16	26786	0.63102725
4444	3.70418327	1.11E-04	0.26996504	0	3	7	FALSE	NUP205	276.6666667	3	0	0	0.75416516		FALSE	0	NUP205	343596	0.35387249
4447	3.85292165	0	0.2595433	0	1	7	FALSE	SPATS2	436	1	0	0	0.74064349		FALSE	0	SPATS2	0	0
4449	3.6605799	3.17E-05	0.27318076	0	2	7	FALSE	SRP72	387	2	0	0	0.7581291		FALSE	0	SRP72	167650	0.51812081
4451	3.85292165	0	0.2595433	0	1	7	FALSE	PRPF38A	436	1	0	0	0.74064349		FALSE	0	PRPF38A	0	0
4453	3.62339531	9.76E-05	0.27598424	0.06666667	6	7	FALSE	RACGAP1	142.5	6	0	0	0.76150952		FALSE	0	RACGAP1	347158	0.17684954
4456	3.58277999	8.20E-05	0.27911287	0	6	7	FALSE	PRPF40A	139.3333333	6	0	0	0.76520182		FALSE	0	PRPF40A	216646	0.1798873
4458	3.85292165	0	0.2595433	0	1	7	FALSE	RCL1	436	1	0	0	0.74064349		FALSE	0	RCL1	0	0
4460	3.62250996	1.49E-04	0.27605169	0.04761905	7	7	FALSE	UTP14A	135.2857143	7	0	0	0.76159		FALSE	0	UTP14A	338656	0.17966813
4462	3.51272687	5.93E-05	0.28467912	0.33333333	3	7	FALSE	NUP43	476.6666667	3	0	0	0.77157028		FALSE	0	NUP43	431186	0.37654809
4464	3.82879593	1.65E-06	0.26117871	0	2	7	FALSE	NVL	302	2	0	0	0.74283673		FALSE	0	NVL	26786	0.63102725
4467	3.85292165	0	0.2595433	0	1	7	FALSE	POP4	436	1	0	0	0.74064349		FALSE	0	POP4	0	0
4469	3.58410801	3.12E-04	0.27900945	0	8	7	FALSE	SAFB	163.625	8	0	0	0.76508109		FALSE	0	SAFB	1108648	0.15429317
4471	3.75232404	6.78E-05	0.2665015	0	3	7	FALSE	SMCHD1	233	3	0	0	0.74978872		FALSE	0	SMCHD1	213864	0.35151515
4473	3.78917663	2.81E-05	0.26390958	0	2	7	FALSE	C8orf33	266	2	0	0	0.74643849		FALSE	0	C8orf33	58226	0.50766284
4475	3.74070385	2.53E-04	0.26732937	0	4	7	FALSE	EXOSC8	154.75	4	0	0	0.7508451		FALSE	0	EXOSC8	536208	0.2579698
4477	3.67939354	8.72E-05	0.27178392	0.16666667	4	7	FALSE	PLRG1	199.5	4	0	0	0.75641877		FALSE	0	PLRG1	192202	0.27410468
4481	3.80699425	2.59E-06	0.26267442	0.33333333	3	7	FALSE	NOL10	240.3333333	3	0	0	0.7448187		FALSE	0	NOL10	33230	0.43399638
4483	2.9523019	0.00450326	0.33871875	0.01795918	50	7	FALSE	PNP	49.86	50	0	0	0.82251801	mRNAup	FALSE	0	PNP	4784406	0.0274512
4485	3.72487826	2.09E-05	0.26846515	0	3	7	FALSE	URB2	234.6666667	3	0	0	0.75228379		FALSE	0	URB2	85550	0.41283863
4487	3.6101151	2.81E-04	0.27699948	0	6	7	FALSE	UCHL1	178.8333333	6	0	0	0.76271681		FALSE	0	UCHL1	742394	0.19039971
4490	3.45528995	1.74E-04	0.28941131	0	7	7	FALSE	FKBP4	196.1428571	7	0	0	0.77679182		FALSE	0	FKBP4	616478	0.16008438
4492	3.71004869	7.99E-05	0.26953824	0	4	7	FALSE	EMG1	171.5	4	0	0	0.75363194		FALSE	0	EMG1	150042	0.26475155
4495	3.50453741	1.90E-04	0.28534436	0	5	7	FALSE	SMARCC2	273.4	5	0	0	0.77231478		FALSE	0	SMARCC2	924648	0.22456719
4497	3.82879593	1.65E-06	0.26117871	0	2	7	FALSE	NOC3L	302	2	0	0	0.74283673		FALSE	0	NOC3L	26786	0.63102725
4503	3.66666667	1.39E-04	0.27272727	0.1	5	7	FALSE	RRP12	229	5	0	0	0.75757576		FALSE	0	RRP12	607982	0.25321508
4505	3.56994245	1.40E-04	0.28011656	0	3	7	FALSE	OSBPL8	376	3	0	0	0.76636887		FALSE	0	OSBPL8	373362	0.35477767
4507	3.82879593	1.65E-06	0.26117871	0	2	7	FALSE	PWP1	302	2	0	0	0.74283673		FALSE	0	PWP1	26786	0.63102725
4510	3.85292165	0	0.2595433	0	1	7	FALSE	PRKRA	436	1	0	0	0.74064349		FALSE	0	PRKRA	0	0
4512	3.54459938	4.54E-04	0.28211933	0	7	7	FALSE	PPP2CB	141.2857143	7	0	0	0.76867278		FALSE	0	PPP2CB	794872	0.15052115
4514	3.72321824	3.62E-05	0.26858485	0.33333333	3	7	FALSE	KIF23	249	3	0	0	0.75243471		FALSE	0	KIF23	161424	0.34827264
4517	3.85292165	0	0.2595433	0	1	7	FALSE	RGPD3	436	1	0	0	0.74064349		FALSE	0	RGPD3	0	0
4519	3.85126162	6.57E-05	0.25965517	0	2	7	FALSE	NARS	221.5	2	0	0	0.7407944		FALSE	0	NARS	139720	0.5
4521	3.85292165	0	0.2595433	0	1	7	FALSE	RFC3	436	1	0	0	0.74064349		FALSE	0	RFC3	0	0
4523	3.75332005	5.50E-05	0.26643078	0	3	7	FALSE	NUP98	186.6666667	3	0	0	0.74969818		FALSE	0	NUP98	88994	0.33819065
4525	3.85292165	0	0.2595433	0	1	7	FALSE	DDX60L	436	1	0	0	0.74064349		FALSE	0	DDX60L	0	0
4529	3.83831341	4.23E-05	0.2605311	0	2	7	FALSE	POLDIP3	235	2	0	0	0.74197151		FALSE	0	POLDIP3	119232	0.50322581
4532	3.85292165	0	0.2595433	0	1	7	FALSE	AHCTF1	436	1	0	0	0.74064349		FALSE	0	AHCTF1	0	0
4536	3.65903054	2.00E-04	0.27329643	0.0952381	7	7	FALSE	BAZ1B	130.8571429	7	0	0	0.75826995		FALSE	0	BAZ1B	513510	0.16743077
[truncated: 7,071 more rows]
