# Supplementary material for: The Genetic and Epigenetic Mechanisms Involved in Irreversible Pulp Neural Inflammation
Source: Dis Markers. 2021 Mar 8;2021:8831948. doi: 10.1155/2021/8831948 (PMC7968449; doi:10.1155/2021/8831948)
Supplement: Supplementary 2 — File S2: the topological characteristics of all nodes in the DElncRNA-DEG interaction network. [file 8831948.f2.txt]

SUID	AverageShortestPathLength	BetweennessCentrality	ClosenessCentrality	ClusteringCoefficient	Degree	degree.layout	Eccentricity	IsSingleNode	name	NeighborhoodConnectivity	NumberOfDirectedEdges	NumberOfUndirectedEdges	PartnerOfMultiEdgedNodePairs	Radiality	regulate	selected	SelfLoops	shared name	Stress	TopologicalCoefficient
4935	1	0	1	0	2	2	1	FALSE	AC010090.1	1	2	0	1	1	lincRNAdown	FALSE	0	AC010090.1	0	0
4936	1	0	1	0	2	2	1	FALSE	AC007405.4	1	2	0	1	1	lincRNAdown	FALSE	0	AC007405.4	0	0
4938	3.05	0.01654457	0.32786885	0.28571429	8	8	6	FALSE	AC079767.4	4.14285714	8	0	1	0.74375	lincRNAup	FALSE	0	AC079767.4	110	0.25892857
4939	2.35	0.51050061	0.42553191	0.05714286	16	16	5	FALSE	AC017002.1	2.26666667	16	0	1	0.83125	lincRNAup	FALSE	0	AC017002.1	1650	0.17333333
4941	1	1	1	0	3	3	1	FALSE	CTB-114C7.4	1	3	0	0	1	lincRNAup	FALSE	0	CTB-114C7.4	6	0
4942	1.66666667	0	0.6	0	1	1	2	FALSE	CASP5	3	1	0	0	0.66666667	mRNAup	FALSE	0	CASP5	0	0
4944	3.23333333	0.02043004	0.30927835	0.44444444	14	14	6	FALSE	CTD-2275D24.1	7	14	0	5	0.68095238	lincRNAup	FALSE	0	CTD-2275D24.1	322	0.41176471
4945	3.43333333	0	0.29126214	1	4	4	6	FALSE	CCL17	9.5	4	0	0	0.65238095	mRNAup	FALSE	0	CCL17	0	0.59375
4947	2.65	0.06115156	0.37735849	0.5	8	8	5	FALSE	CD99L2	8.625	8	0	0	0.76428571	mRNAup	FALSE	0	CD99L2	1404	0.33173077
4949	3.03333333	0.06898705	0.32967033	0.13333333	7	7	5	FALSE	AF241725.4	5.16666667	7	0	1	0.70952381	lincRNAup	FALSE	0	AF241725.4	970	0.33333333
4951	3.36666667	0.00429011	0.2970297	0.5	12	12	6	FALSE	CTD-2296D1.1	7.25	12	0	4	0.66190476	lincRNAup	FALSE	0	CTD-2296D1.1	102	0.453125
4954	2.56666667	0.17922917	0.38961039	0.37179487	21	21	5	FALSE	CTD-2568A17.1	6.92307692	21	0	8	0.77619048	lincRNAup	FALSE	0	CTD-2568A17.1	2688	0.26627219
4959	3.46666667	1.41E-04	0.28846154	0.83333333	6	6	6	FALSE	CTD-3179P9.2	8.75	6	0	2	0.64761905	lincRNAup	FALSE	0	CTD-3179P9.2	2	0.625
4962	1	0	1	0	2	2	1	FALSE	KBTBD11-OT1	1	2	0	1	1	lincRNAdown	FALSE	0	KBTBD11-OT1	0	0
4963	1	0	1	0	2	2	1	FALSE	AC092198.1	1	2	0	1	1	lincRNAdown	FALSE	0	AC092198.1	0	0
4965	1	0	1	0	1	1	1	FALSE	LINC00844	1	1	0	0	1	lincRNAdown	FALSE	0	LINC00844	0	0
4966	1	0	1	0	1	1	1	FALSE	GAP43	1	1	0	0	1	mRNAdown	FALSE	0	GAP43	0	0
4968	2.61666667	0.01053104	0.38216561	0.43589744	17	17	5	FALSE	LINC01043	11.07692308	17	0	4	0.76904762	lincRNAup	FALSE	0	LINC01043	418	0.36923077
4969	3.11666667	0.00560495	0.32085561	0.4	5	5	6	FALSE	CT47A2	12.4	5	0	0	0.69761905	mRNAup	FALSE	0	CT47A2	236	0.46923077
4971	2.6	0.00401527	0.38461538	0.61111111	9	9	6	FALSE	GRIK3	16.33333333	9	0	0	0.77142857	mRNAup	FALSE	0	GRIK3	166	0.48039216
4973	2.71666667	0.01259798	0.36809816	0.55555556	9	9	6	FALSE	CALCA	15.22222222	9	0	0	0.7547619	mRNAup	FALSE	0	CALCA	266	0.49103943
4975	2.81666667	4.78E-04	0.35502959	0.8	6	6	6	FALSE	C1orf186	16.16666667	6	0	0	0.74047619	mRNAup	FALSE	0	C1orf186	16	0.57738095
4977	2.63333333	0.03576943	0.37974684	0.4	10	10	6	FALSE	IL36B	13.6	10	0	0	0.76666667	mRNAup	FALSE	0	IL36B	938	0.421875
4979	3.125	0.20347985	0.32	0	9	9	7	FALSE	LINC01057	2	9	0	0	0.734375	lincRNAup	FALSE	0	LINC01057	1252	0.33333333
4980	3.075	0.01830281	0.32520325	0	2	2	6	FALSE	CSF2RA	12	2	0	0	0.740625	mRNAup	FALSE	0	CSF2RA	180	0.61111111
4982	4.1	0	0.24390244	0	1	1	8	FALSE	FCGR2B	9	1	0	0	0.6125	mRNAup	FALSE	0	FCGR2B	0	0
4984	3.05	0.02507937	0.32786885	0.33333333	3	3	6	FALSE	HCLS1	10.33333333	3	0	0	0.74375	mRNAup	FALSE	0	HCLS1	230	0.52631579
4986	3.05	0.02507937	0.32786885	0.33333333	3	3	6	FALSE	DPP4	10.33333333	3	0	0	0.74375	mRNAup	FALSE	0	DPP4	230	0.52631579
4988	2.575	0.21405983	0.38834951	0	3	3	6	FALSE	ENST00000538290	11.66666667	3	0	0	0.803125	mRNAup	FALSE	0	ENST00000538290	738	0.39506173
4990	4.1	0	0.24390244	0	1	1	8	FALSE	CLEC4E	9	1	0	0	0.6125	mRNAup	FALSE	0	CLEC4E	0	0
4992	3.1	0.0496337	0.32258065	0	2	2	6	FALSE	BID	10	2	0	0	0.7375	mRNAup	FALSE	0	BID	240	0.52941176
4994	3.075	0.01830281	0.32520325	0	2	2	6	FALSE	IKZF1	12	2	0	0	0.740625	mRNAup	FALSE	0	IKZF1	180	0.61111111
4996	1	1	1	0	5	5	1	FALSE	LINC01094	1	5	0	0	1	lincRNAup	FALSE	0	LINC01094	20	0
4997	1.8	0	0.55555556	0	1	1	2	FALSE	FYB	5	1	0	0	0.6	mRNAup	FALSE	0	FYB	0	0
4999	1.8	0	0.55555556	0	1	1	2	FALSE	LILRB1	5	1	0	0	0.6	mRNAup	FALSE	0	LILRB1	0	0
5001	1.8	0	0.55555556	0	1	1	2	FALSE	CLEC7A	5	1	0	0	0.6	mRNAup	FALSE	0	CLEC7A	0	0
5003	1.8	0	0.55555556	0	1	1	2	FALSE	HPSE	5	1	0	0	0.6	mRNAup	FALSE	0	HPSE	0	0
5005	2.55	0.41865079	0.39215686	0	11	11	5	FALSE	MIR155HG	1.36363636	11	0	0	0.80625	lincRNAup	FALSE	0	MIR155HG	1064	0.12121212
5006	3.525	0	0.28368794	0	1	1	6	FALSE	BATF	11	1	0	0	0.684375	mRNAup	FALSE	0	BATF	0	0
5009	3.525	0	0.28368794	0	1	1	6	FALSE	ENST00000252725	11	1	0	0	0.684375	mRNAup	FALSE	0	ENST00000252725	0	0
5011	3.525	0	0.28368794	0	1	1	6	FALSE	CD44	11	1	0	0	0.684375	mRNAup	FALSE	0	CD44	0	0
5013	2.975	0.15521978	0.33613445	0	2	2	4	FALSE	IBSP	9	2	0	0	0.753125	mRNAup	FALSE	0	IBSP	400	0.5
5015	3.525	0	0.28368794	0	1	1	6	FALSE	IL13RA1	11	1	0	0	0.684375	mRNAup	FALSE	0	IL13RA1	0	0
5017	3.525	0	0.28368794	0	1	1	6	FALSE	KPNA2	11	1	0	0	0.684375	mRNAup	FALSE	0	KPNA2	0	0
5019	3.525	0	0.28368794	0	1	1	6	FALSE	EZH2	11	1	0	0	0.684375	mRNAup	FALSE	0	EZH2	0	0
5022	2.28333333	0.18869008	0.4379562	0.20588235	21	21	5	FALSE	PRSS29P	9.11764706	21	0	4	0.81666667	lincRNAup	FALSE	0	PRSS29P	3886	0.26916221
5023	3.23333333	0.01638418	0.30927835	0	2	2	6	FALSE	CBX7	9.5	2	0	0	0.68095238	mRNAup	FALSE	0	CBX7	478	0.53125
5025	3.23333333	0.01638418	0.30927835	0	2	2	6	FALSE	NDUFS3	9.5	2	0	0	0.68095238	mRNAup	FALSE	0	NDUFS3	478	0.53125
5027	2.65	0.0029615	0.37735849	0.66666667	7	7	6	FALSE	PIPOX	16.28571429	7	0	0	0.76428571	mRNAup	FALSE	0	PIPOX	106	0.49350649
5029	3.05	0.00139484	0.32786885	0.66666667	6	6	6	FALSE	CTD-2008P7.8	10.5	6	0	2	0.70714286	lincRNAup	FALSE	0	CTD-2008P7.8	48	0.42
5031	2.73333333	0.00499889	0.36585366	0.6	6	6	6	FALSE	PAX3	14.83333333	6	0	0	0.75238095	mRNAup	FALSE	0	PAX3	192	0.47849462
5033	2.56666667	0.08456968	0.38961039	0.16666667	4	4	4	FALSE	ENST00000307503	10	4	0	0	0.77619048	mRNAup	FALSE	0	ENST00000307503	1388	0.36538462
5035	2.15	0.08844751	0.46511628	0.35897436	13	13	4	FALSE	PDE7A	13.61538462	13	0	0	0.83571429	mRNAup	FALSE	0	PDE7A	2868	0.33208255
5039	2.25	0.03363227	0.44444444	0.47222222	9	9	4	FALSE	MYL7	15.11111111	9	0	0	0.82142857	mRNAup	FALSE	0	MYL7	1638	0.38746439
5041	2.48333333	0.00914061	0.40268456	0.59090909	17	17	5	FALSE	RP1-15D23.2	13.41666667	17	0	5	0.78809524	lincRNAup	FALSE	0	RP1-15D23.2	348	0.38333333
5047	2.7	0.04176524	0.37037037	0.25	9	9	4	FALSE	RP11-1029J19.2	7.125	9	0	1	0.75714286	lincRNAup	FALSE	0	RP11-1029J19.2	1956	0.33928571
5050	2.48333333	0.08156863	0.40268456	0.30555556	11	11	4	FALSE	AC004947.2	7.55555556	11	0	2	0.78809524	lincRNAup	FALSE	0	AC004947.2	2354	0.30222222
5053	3.38333333	0.06553672	0.2955665	0.33333333	3	3	5	FALSE	ENST00000330906	6.33333333	3	0	0	0.65952381	mRNAup	FALSE	0	ENST00000330906	2544	0.6
5055	3.33333333	0.01660117	0.3	0.36111111	13	13	6	FALSE	RP11-145G20.1	6.77777778	13	0	4	0.66666667	lincRNAup	FALSE	0	RP11-145G20.1	356	0.39869281
5056	3.26666667	0.00636581	0.30612245	0.46666667	6	6	6	FALSE	LETM2	8	6	0	0	0.67619048	mRNAup	FALSE	0	LETM2	130	0.46078431
5059	3.65	0.00267853	0.2739726	0.33333333	4	4	6	FALSE	GHRHR	7.75	4	0	0	0.62142857	mRNAup	FALSE	0	GHRHR	70	0.53571429
5062	3.26666667	0.00406038	0.30612245	0.6	6	6	6	FALSE	PRDM11	8.83333333	6	0	0	0.67619048	mRNAup	FALSE	0	PRDM11	102	0.49074074
5064	2.06666667	0.32645541	0.48387097	0.3030303	18	18	4	FALSE	RP11-1M18.1	10.41666667	18	0	6	0.84761905	lincRNAup	FALSE	0	RP11-1M18.1	5466	0.22644928
5068	2.53333333	0.07050534	0.39473684	0.28571429	10	10	5	FALSE	AC009502.4	8.28571429	10	0	3	0.78095238	lincRNAup	FALSE	0	AC009502.4	864	0.2962963
5072	2.68333333	0.00780749	0.37267081	0.66666667	4	4	5	FALSE	BTN1A1	10.75	4	0	0	0.75952381	mRNAup	FALSE	0	BTN1A1	150	0.41346154
5074	3.51666667	0	0.28436019	0	2	2	6	FALSE	RP11-203H2.1	7	2	0	1	0.64047619	lincRNAup	FALSE	0	RP11-203H2.1	0	0
5076	1	0	1	0	1	1	1	FALSE	RP11-240M16.1	1	1	0	0	1	lincRNAup	FALSE	0	RP11-240M16.1	0	0
5077	1	0	1	0	1	1	1	FALSE	JAK2	1	1	0	0	1	mRNAup	FALSE	0	JAK2	0	0
5079	3.58333333	1.13E-04	0.27906977	0	2	2	7	FALSE	RP11-278H7.1	7.5	2	0	0	0.63095238	lincRNAup	FALSE	0	RP11-278H7.1	2	0.72222222
5082	2.71666667	0.04138894	0.36809816	0.46666667	9	9	5	FALSE	RP11-284G10.1	8	9	0	3	0.7547619	lincRNAup	FALSE	0	RP11-284G10.1	736	0.33333333
5088	2.75	0.40595238	0.36363636	0	7	7	5	FALSE	RP11-38J22.6	1.42857143	7	0	0	0.78125	lincRNAup	FALSE	0	RP11-38J22.6	1110	0.14285714
5089	3.725	0	0.26845638	0	1	1	6	FALSE	PTPN22	7	1	0	0	0.659375	mRNAup	FALSE	0	PTPN22	0	0
5091	3.725	0	0.26845638	0	1	1	6	FALSE	HLA-DPB1	7	1	0	0	0.659375	mRNAup	FALSE	0	HLA-DPB1	0	0
5094	3.725	0	0.26845638	0	1	1	6	FALSE	ENST00000368135	7	1	0	0	0.659375	mRNAup	FALSE	0	ENST00000368135	0	0
5096	2.775	0.23021978	0.36036036	0	2	2	4	FALSE	CD72	11	2	0	0	0.778125	mRNAup	FALSE	0	CD72	728	0.5
5098	1	0	1	0	1	1	1	FALSE	RP11-395L14.3	1	1	0	0	1	lincRNAup	FALSE	0	RP11-395L14.3	0	0
5099	1	0	1	0	1	1	1	FALSE	ENST00000431067	1	1	0	0	1	mRNAup	FALSE	0	ENST00000431067	0	0
5101	1	0	1	0	1	1	1	FALSE	RP11-396C23.2	1	1	0	0	1	lincRNAdown	FALSE	0	RP11-396C23.2	0	0
5102	1	0	1	0	1	1	1	FALSE	PHGDH	1	1	0	0	1	mRNAdown	FALSE	0	PHGDH	0	0
5104	1	0	1	1	5	5	1	FALSE	RP11-424G14.1	3	5	0	2	1	lincRNAup	FALSE	0	RP11-424G14.1	0	1
5105	1	0	1	1	5	5	1	FALSE	FAM224B	3	5	0	2	1	lincRNAup	FALSE	0	FAM224B	0	1
5107	2.66666667	0.03491119	0.375	0.3974359	17	17	6	FALSE	RP11-442O18.1	10.15384615	17	0	4	0.76190476	lincRNAup	FALSE	0	RP11-442O18.1	726	0.33846154
5110	2.9	0	0.34482759	1	4	4	6	FALSE	ATP6V0A4	18.25	4	0	0	0.72857143	mRNAup	FALSE	0	ATP6V0A4	0	0.67592593
5113	3.6	0	0.27777778	1	2	2	7	FALSE	L3MBTL3	11.5	2	0	0	0.62857143	mRNAup	FALSE	0	L3MBTL3	0	0.76666667
5116	3.18333333	0	0.31413613	1	3	3	6	FALSE	ACADVL	15.33333333	3	0	0	0.68809524	mRNAup	FALSE	0	ACADVL	0	0.61333333
5118	3.35	0.00459174	0.29850746	0.5	13	13	6	FALSE	RP11-521D12.1	7.375	13	0	5	0.66428571	lincRNAup	FALSE	0	RP11-521D12.1	60	0.43382353
5125	3.53333333	0	0.28301887	1	2	2	6	FALSE	ENST00000309154	10.5	2	0	0	0.63809524	mRNAup	FALSE	0	ENST00000309154	0	0.80769231
5128	1	0	1	0	1	1	1	FALSE	RP11-526P6.1	1	1	0	0	1	lincRNAup	FALSE	0	RP11-526P6.1	0	0
5129	1	0	1	0	1	1	1	FALSE	ENST00000338040	1	1	0	0	1	mRNAup	FALSE	0	ENST00000338040	0	0
5131	2.21666667	0.08384754	0.45112782	0.37908497	25	25	5	FALSE	RP11-555G19.1	10.94444444	25	0	7	0.82619048	lincRNAup	FALSE	0	RP11-555G19.1	1936	0.30401235
5142	4.35	0.14615385	0.22988506	0	4	4	7	FALSE	RP11-600K15.1	1.25	4	0	0	0.58125	lincRNAup	FALSE	0	RP11-600K15.1	378	0.25
5143	5.325	0	0.18779343	0	1	1	8	FALSE	ENST00000395388	4	1	0	0	0.459375	mRNAup	FALSE	0	ENST00000395388	0	0
5145	5.325	0	0.18779343	0	1	1	8	FALSE	IFI16	4	1	0	0	0.459375	mRNAup	FALSE	0	IFI16	0	0
5147	2.75	0.00149189	0.36363636	0.71428571	10	10	5	FALSE	RP11-627D16.1	12.14285714	10	0	3	0.75	lincRNAup	FALSE	0	RP11-627D16.1	94	0.43367347
5153	2.53333333	0.01950748	0.39473684	0.44761905	20	20	5	FALSE	RP11-686F15.2	11.8	20	0	5	0.78095238	lincRNAup	FALSE	0	RP11-686F15.2	840	0.35757576
5163	2.26666667	0.09257337	0.44117647	0.36363636	32	32	5	FALSE	RP11-702F3.3	10.60869565	32	0	9	0.81904762	lincRNAup	FALSE	0	RP11-702F3.3	2384	0.2867215
5181	4.18333333	2.82E-04	0.23904382	0	2	2	7	FALSE	RP11-764K9.1	2	2	0	0	0.5452381	lincRNAup	FALSE	0	RP11-764K9.1	2	1
5184	2.58333333	0.01555518	0.38709677	0.47252747	19	19	5	FALSE	RP11-783L4.1	11.57142857	19	0	5	0.77380952	lincRNAup	FALSE	0	RP11-783L4.1	682	0.37327189
5196	1	1	1	0	3	3	1	FALSE	RP11-806H10.4	1	3	0	0	1	lincRNAup	FALSE	0	RP11-806H10.4	6	0
5197	1.66666667	0	0.6	0	1	1	2	FALSE	NABP1	3	1	0	0	0.66666667	mRNAup	FALSE	0	NABP1	0	0
5199	1.66666667	0	0.6	0	1	1	2	FALSE	PLAUR	3	1	0	0	0.66666667	mRNAup	FALSE	0	PLAUR	0	0
5201	1.66666667	0	0.6	0	1	1	2	FALSE	ENST00000567380	3	1	0	0	0.66666667	mRNAup	FALSE	0	ENST00000567380	0	0
5203	1	0	1	0	1	1	1	FALSE	RP11-90P13.1	1	1	0	0	1	lincRNAup	FALSE	0	RP11-90P13.1	0	0
5204	1	0	1	0	1	1	1	FALSE	CYTIP	1	1	0	0	1	mRNAup	FALSE	0	CYTIP	0	0
5206	3.35	0.0054601	0.29850746	0.57142857	12	12	6	FALSE	RP3-340N1.6	7.625	12	0	4	0.66428571	lincRNAup	FALSE	0	RP3-340N1.6	168	0.44852941
5215	1	1	1	0	2	2	1	FALSE	RP4-809F18.2	1	2	0	0	1	lincRNAdown	FALSE	0	RP4-809F18.2	2	0
5216	1.5	0	0.66666667	0	1	1	2	FALSE	GAS2L2	2	1	0	0	0.75	mRNAdown	FALSE	0	GAS2L2	0	0
5218	1.5	0	0.66666667	0	1	1	2	FALSE	ENST00000244728	2	1	0	0	0.75	mRNAdown	FALSE	0	ENST00000244728	0	0
5220	2.05	0.14685811	0.48780488	0.3982684	32	32	5	FALSE	RP5-963E22.4	11.18181818	32	0	10	0.85	lincRNAup	FALSE	0	RP5-963E22.4	2980	0.27954545
5240	3.03333333	0.01404135	0.32967033	0.33333333	13	13	6	FALSE	RP5-991O23.1	8.5	13	0	3	0.70952381	lincRNAup	FALSE	0	RP5-991O23.1	320	0.31481481
5249	1	0	1	1	5	5	1	FALSE	TTTY15	3	5	0	2	1	lincRNAup	FALSE	0	TTTY15	0	1
5252	1	0	1	0	2	2	1	FALSE	XIST	1	2	0	1	1	lincRNAdown	FALSE	0	XIST	0	0
5253	1	0	1	0	2	2	1	FALSE	TSIX	1	2	0	1	1	lincRNAdown	FALSE	0	TSIX	0	0
5256	2.86666667	0.00381177	0.34883721	0.33333333	3	3	4	FALSE	UBL7	11.33333333	3	0	0	0.73333333	mRNAup	FALSE	0	UBL7	208	0.52380952
5258	2.46666667	0.00920232	0.40540541	0.4	6	6	4	FALSE	TSGA13	12.33333333	6	0	0	0.79047619	mRNAup	FALSE	0	TSGA13	506	0.41111111
5262	2.23333333	0.04048364	0.44776119	0.44444444	10	10	4	FALSE	ZNF502	15	10	0	0	0.82380952	mRNAup	FALSE	0	ZNF502	1944	0.38461538
5274	3.51666667	0	0.28436019	0	1	1	6	FALSE	DPP9	7	1	0	0	0.64047619	mRNAup	FALSE	0	DPP9	0	0
5276	3.325	0	0.30075188	0	1	1	6	FALSE	GPR65	15	1	0	0	0.709375	mRNAup	FALSE	0	GPR65	0	0
5279	3.325	0	0.30075188	0	1	1	6	FALSE	ENST00000512369	15	1	0	0	0.709375	mRNAup	FALSE	0	ENST00000512369	0	0
5281	3.3	0	0.3030303	1	2	2	6	FALSE	TBXAS1	11	2	0	0	0.7125	mRNAup	FALSE	0	TBXAS1	0	0.73333333
5284	3.3	0	0.3030303	1	2	2	6	FALSE	TRAF3IP3	11	2	0	0	0.7125	mRNAup	FALSE	0	TRAF3IP3	0	0.73333333
5287	3.3	0	0.3030303	1	2	2	6	FALSE	RHOH	11	2	0	0	0.7125	mRNAup	FALSE	0	RHOH	0	0.73333333
5292	3.3	0	0.3030303	1	2	2	6	FALSE	CD163L1	11	2	0	0	0.7125	mRNAup	FALSE	0	CD163L1	0	0.73333333
5294	3.325	0	0.30075188	0	1	1	6	FALSE	SP140	15	1	0	0	0.709375	mRNAup	FALSE	0	SP140	0	0
5297	3.325	0	0.30075188	0	1	1	6	FALSE	CCR2	15	1	0	0	0.709375	mRNAup	FALSE	0	CCR2	0	0
5305	1	0	1	0	1	1	1	FALSE	AC090505.6	1	1	0	0	1	lincRNAup	FALSE	0	AC090505.6	0	0
5306	1	0	1	0	1	1	1	FALSE	PDLIM2	1	1	0	0	1	mRNAup	FALSE	0	PDLIM2	0	0
5309	1	0	1	0	1	1	1	FALSE	AC109826.1	1	1	0	0	1	lincRNAup	FALSE	0	AC109826.1	0	0
5310	1	0	1	0	1	1	1	FALSE	CFP	1	1	0	0	1	mRNAup	FALSE	0	CFP	0	0
5314	3.76666667	0	0.26548673	1	2	2	6	FALSE	KLF8	7.5	2	0	0	0.6047619	mRNAup	FALSE	0	KLF8	0	0.625
5319	4.33333333	0.03333333	0.23076923	0	2	2	6	FALSE	AP000439.3	2	2	0	0	0.52380952	lincRNAup	FALSE	0	AP000439.3	1274	0.5
5321	5.31666667	0	0.18808777	0	1	1	7	FALSE	ENST00000441493	2	1	0	0	0.38333333	mRNAup	FALSE	0	ENST00000441493	0	0
5323	1.66666667	0	0.6	0	1	1	2	FALSE	SYN1	3	1	0	0	0.66666667	mRNAup	FALSE	0	SYN1	0	0
5325	1.66666667	0	0.6	0	1	1	2	FALSE	SRPX2	3	1	0	0	0.66666667	mRNAup	FALSE	0	SRPX2	0	0
5327	2.6	0.01373656	0.38461538	0.47222222	9	9	6	FALSE	SYT3	15	9	0	0	0.77142857	mRNAup	FALSE	0	SYT3	428	0.44117647
5356	1	0	1	1	3	3	1	FALSE	UTY	3	3	0	0	1	mRNAup	FALSE	0	UTY	0	1
5366	2.58333333	0.00857335	0.38709677	0.53333333	10	10	6	FALSE	SYBU	15.7	10	0	0	0.77380952	mRNAup	FALSE	0	SYBU	340	0.46176471
5368	4.1	0	0.24390244	0	1	1	8	FALSE	VAV1	9	1	0	0	0.6125	mRNAup	FALSE	0	VAV1	0	0
5370	1.8	0	0.55555556	0	1	1	2	FALSE	RPS9	5	1	0	0	0.6	mRNAup	FALSE	0	RPS9	0	0
5372	3.525	0	0.28368794	0	1	1	6	FALSE	MPZL2	11	1	0	0	0.684375	mRNAup	FALSE	0	MPZL2	0	0
5374	3.525	0	0.28368794	0	1	1	6	FALSE	SRGN	11	1	0	0	0.684375	mRNAup	FALSE	0	SRGN	0	0
5394	3.58333333	0	0.27906977	1	2	2	6	FALSE	ZNF491	7.5	2	0	0	0.63095238	mRNAup	FALSE	0	ZNF491	0	0.68181818
5404	3.525	0.18461538	0.28368794	0	2	2	6	FALSE	UBAC2	5.5	2	0	0	0.684375	mRNAup	FALSE	0	UBAC2	488	0.5
5406	3.725	0	0.26845638	0	1	1	6	FALSE	STAMBPL1	7	1	0	0	0.659375	mRNAup	FALSE	0	STAMBPL1	0	0
5424	5.325	0	0.18779343	0	1	1	8	FALSE	SLC6A14	4	1	0	0	0.459375	mRNAup	FALSE	0	SLC6A14	0	0
