# Supplementary material for: The Genetic and Epigenetic Mechanisms Involved in Irreversible Pulp Neural Inflammation
Source: Dis Markers. 2021 Mar 8;2021:8831948. doi: 10.1155/2021/8831948 (PMC7968449; doi:10.1155/2021/8831948)
Supplement: Supplementary 3 — File S3: the topological characteristics of all nodes in the TF-DEG interaction network. [file 8831948.f3.txt]

SUID	AverageShortestPathLength	BetweennessCentrality	ClosenessCentrality	ClusteringCoefficient	Degree	Eccentricity	IsSingleNode	name	NeighborhoodConnectivity	NumberOfDirectedEdges	NumberOfUndirectedEdges	PartnerOfMultiEdgedNodePairs	Radiality	regulate	selected	SelfLoops	shared name	Stress	TopologicalCoefficient
100	2.86163522	3.42E-05	0.34945055	0	3	5	FALSE	A4GNT	285	3	0	0	0.68972746	up	FALSE	0	A4GNT	37682	0.40981241
101	3.03773585	1.39E-04	0.32919255	0	16	5	FALSE	CDC5L	27.125	16	0	0	0.66037736	TF_other	FALSE	0	CDC5L	144188	0.14045699
103	2.18753573	0.08279112	0.45713539	0.0032635	414	4	FALSE	AR	19.06280193	414	0	0	0.80207738	TF_other	FALSE	0	AR	52679266	0.02330064
105	2.22012579	0.09284757	0.45042493	0.00137625	425	4	FALSE	YBX1	17.01882353	425	0	0	0.7966457	TF_other	FALSE	0	YBX1	57384564	0.02440558
107	2.28816467	0.00520302	0.43703148	0.00951374	44	4	FALSE	ABCA1	115.6590909	44	0	0	0.78530589	up	FALSE	0	ABCA1	2598306	0.09589847
108	2.50085763	0.01123109	0.39986283	0.00657797	165	5	FALSE	E2F1	27.72727273	165	0	0	0.74985706	TF_other	FALSE	0	E2F1	8487890	0.04104892
110	2.24013722	0.09211348	0.44640123	0.00128297	407	4	FALSE	FOXP3	15.17199017	407	0	0	0.79331046	TF_other	FALSE	0	FOXP3	60737480	0.02202286
112	2.79645512	7.69E-04	0.35759558	0.00601093	61	5	FALSE	MAX	30.95081967	61	0	0	0.70059081	TF_other	FALSE	0	MAX	936544	0.0791274
114	2.54716981	0.0093861	0.39259259	0.00777001	144	4	FALSE	MYC	28.14583333	144	0	0	0.74213836	TF_other	FALSE	0	MYC	6297218	0.04423043
116	2.90737564	3.38E-04	0.3439528	0.00539811	39	5	FALSE	NF-AT1	28.46153846	39	0	0	0.68210406	TF_other	FALSE	0	NF-AT1	374300	0.09680612
118	2.49170955	0.00873914	0.40133089	0.0111034	132	4	FALSE	RELA	26.78787879	132	0	0	0.75138174	TF_other	FALSE	0	RELA	4823650	0.0358324
120	2.51229274	0.01672367	0.39804279	0.00525974	176	4	FALSE	STAT1	25.56818182	176	0	0	0.74795121	TF_other	FALSE	0	STAT1	11509342	0.03983636
122	2.89193825	7.82E-04	0.34578885	0	33	5	FALSE	SP3	26.21212121	33	0	0	0.68467696	TF_other	FALSE	0	SP3	443800	0.08754209
124	2.85706118	3.08E-04	0.35001001	0.00634921	36	5	FALSE	GR-alpha	29.44444444	36	0	0	0.6904898	TF_other	FALSE	0	GR-alpha	347528	0.08741081
126	2.85134362	9.59E-04	0.35071185	0.00348432	42	5	FALSE	USF2	28.85714286	42	0	0	0.69144273	TF_other	FALSE	0	USF2	686214	0.08470418
128	2.81989708	6.10E-04	0.35462287	0.0055371	43	5	FALSE	NR3C1	29.1627907	43	0	0	0.69668382	TF_other	FALSE	0	NR3C1	520322	0.07775364
130	2.77301315	0.00195589	0.36061856	0.01190476	57	5	FALSE	NFE2L1	30.49122807	57	0	0	0.70449781	TF_other	FALSE	0	NFE2L1	1053602	0.07208238
132	2.85706118	3.08E-04	0.35001001	0.00634921	36	5	FALSE	GCGR	29.44444444	36	0	0	0.6904898	TF_other	FALSE	0	GCGR	347528	0.08741081
134	2.5511721	0.01081857	0.39197669	0.01034483	116	4	FALSE	TBP	27.5	116	0	0	0.74147132	TF_other	FALSE	0	TBP	5336028	0.04060319
136	2.03887936	0.11659147	0.49046551	0.00308432	518	4	FALSE	GATA2	18.54440154	518	0	0	0.82685344	TF_other	FALSE	0	GATA2	67525216	0.02016302
139	2.73070326	0.00212156	0.36620603	0.00200803	84	4	FALSE	PATZ1	29.3452381	84	0	0	0.71154946	TF_other	FALSE	0	PATZ1	2215282	0.06761113
141	2.46712407	0.01228774	0.40533024	0.00746855	160	4	FALSE	NFKB1	24.9625	160	0	0	0.75547932	TF_other	FALSE	0	NFKB1	7275250	0.03340458
143	2.99428245	1.18E-04	0.33396983	0	23	5	FALSE	FOXC1	26.39130435	23	0	0	0.66761959	TF_other	FALSE	0	FOXC1	92988	0.12386002
145	2.6815323	0.00415569	0.37292111	0.00261233	88	5	FALSE	USF1	28.80681818	88	0	0	0.71974462	TF_other	FALSE	0	USF1	2743656	0.05930322
147	3.1406518	3.75E-05	0.31840524	0	8	5	FALSE	RXRA	22	8	0	0	0.6432247	TF_other	FALSE	0	RXRA	22650	0.1875
150	2.73985134	9.72E-04	0.36498331	0.00903955	60	4	FALSE	Max1	33.6	60	0	0	0.71002478	TF_other	FALSE	0	Max1	841636	0.07271386
152	3.14865638	5.58E-06	0.31759579	0	3	5	FALSE	SREBF2	39.33333333	3	0	0	0.6418906	TF_other	FALSE	0	SREBF2	2064	0.40780142
154	2.90737564	3.38E-04	0.3439528	0.00539811	39	5	FALSE	NF-AT3	28.46153846	39	0	0	0.68210406	TF_other	FALSE	0	NF-AT3	374300	0.09680612
156	2.90737564	3.38E-04	0.3439528	0.00539811	39	5	FALSE	NF-AT4	28.46153846	39	0	0	0.68210406	TF_other	FALSE	0	NF-AT4	374300	0.09680612
158	2.77758719	0.00430164	0.3600247	0.00246238	86	4	FALSE	MEF-2A	23.87209302	86	0	0	0.70373547	TF_other	FALSE	0	MEF-2A	3488110	0.0628733
160	2.90737564	3.38E-04	0.3439528	0.00539811	39	5	FALSE	NF-AT2	28.46153846	39	0	0	0.68210406	TF_other	FALSE	0	NF-AT2	374300	0.09680612
162	2.50714694	0.02510997	0.39885975	0.00248744	203	4	FALSE	E2F4	19.28078818	203	0	0	0.74880884	TF_other	FALSE	0	E2F4	17258796	0.03155395
164	2.61520869	0.00567821	0.38237866	0.00736811	117	4	FALSE	GATA3	24.4017094	117	0	0	0.73079855	TF_other	FALSE	0	GATA3	3998026	0.04171361
166	2.3619211	0.02271018	0.42338417	0.00842438	214	4	FALSE	SP1	27.15420561	214	0	0	0.77301315	TF_other	FALSE	0	SP1	13496614	0.03168479
168	2.89879931	4.62E-04	0.34497041	0.00269906	39	5	FALSE	NF-E2	26.15384615	39	0	0	0.68353345	TF_other	FALSE	0	NF-E2	203100	0.08438384
170	3.26014866	1.03E-06	0.30673448	0	2	5	FALSE	NR1H3	33.5	2	0	0	0.62330856	TF_other	FALSE	0	NR1H3	2184	0.56034483
172	2.70440252	0.00281477	0.36976744	0.0045864	111	4	FALSE	DAND5	29.35135135	111	0	0	0.71593291	TF_other	FALSE	0	DAND5	3439538	0.06374526
174	2.71412236	0.00260683	0.36844323	0.00467056	110	4	FALSE	PSG1	29.24545455	110	0	0	0.71431294	TF_other	FALSE	0	PSG1	3383590	0.06511
176	2.26129217	0.00699895	0.44222503	0.07453416	70	4	FALSE	NFE2	66.57142857	70	0	0	0.78978464	TF_up	FALSE	0	NFE2	960906	0.05394508
178	3.26014866	1.03E-06	0.30673448	0	2	5	FALSE	NR1H2	33.5	2	0	0	0.62330856	TF_other	FALSE	0	NR1H2	2184	0.56034483
180	2.89879931	4.62E-04	0.34497041	0.00269906	39	5	FALSE	MAFK	26.15384615	39	0	0	0.68353345	TF_other	FALSE	0	MAFK	203100	0.08438384
182	2.66266438	0.00630862	0.37556367	0.003663	91	4	FALSE	SREBF1	26.3956044	91	0	0	0.72288927	TF_other	FALSE	0	SREBF1	3891446	0.05085968
184	2.91652373	2.64E-04	0.34287395	0.02857143	15	5	FALSE	GLI2	31.93333333	15	0	0	0.68057938	TF_other	FALSE	0	GLI2	117642	0.11223022
186	2.05603202	0.11527216	0.48637375	0.0028654	508	4	FALSE	ETS1	18.1496063	508	0	0	0.82399466	TF_other	FALSE	0	ETS1	65004840	0.02038007
188	2.757004	9.75E-04	0.36271257	0.01256039	46	4	FALSE	FOXO1	31.82608696	46	0	0	0.707166	TF_other	FALSE	0	FOXO1	635808	0.06811911
190	2.87421384	8.10E-04	0.34792123	8.87E-04	48	5	FALSE	MYCN	28.02083333	48	0	0	0.68763103	TF_other	FALSE	0	MYCN	703198	0.09462413
192	3.28759291	0	0.30417391	0	1	5	FALSE	ZNF202	44	1	0	0	0.61873451	TF_other	FALSE	0	ZNF202	0	0
194	2.6329331	0.00140354	0.37980456	0	11	5	FALSE	ABCC3	139.4545455	11	0	0	0.72784448	up	FALSE	0	ABCC3	887276	0.15591728
196	2.96740995	5.42E-04	0.33699422	0	34	5	FALSE	ZBTB6	25.91176471	34	0	0	0.67209834	TF_other	FALSE	0	ZBTB6	627794	0.108785
199	2.97655803	1.76E-04	0.33595851	0.01904762	15	5	FALSE	RARA	25	15	0	0	0.67057366	TF_other	FALSE	0	RARA	76340	0.10707965
201	3.63236135	0	0.27530301	0	1	6	FALSE	NR5A2	11	1	0	0	0.56127311	TF_other	FALSE	0	NR5A2	0	0
205	2.61806747	0.01005951	0.38196113	0.0043951	132	4	FALSE	TP53	24.32575758	132	0	0	0.73032209	TF_other	FALSE	0	TP53	6411162	0.04512139
207	2.80960549	0.00237515	0.35592186	0.00152207	73	5	FALSE	TFAP2C	19.80821918	73	0	0	0.69839909	TF_other	FALSE	0	TFAP2C	1824836	0.05317384
210	3.02401372	9.03E-05	0.33068633	0	15	5	FALSE	SOX2	22.6	15	0	0	0.66266438	TF_other	FALSE	0	SOX2	67822	0.12631579
212	2.79759863	2.51E-05	0.35744942	0	4	5	FALSE	ABCC9	259.25	4	0	0	0.70040023	up	FALSE	0	ABCC9	40656	0.34804582
213	2.7672956	9.84E-04	0.36136364	0.01020408	49	5	FALSE	HOXA5	30.83673469	49	0	0	0.70545073	TF_other	FALSE	0	HOXA5	676736	0.06963341
215	2.7186964	0.00214042	0.36782334	0.01298701	56	4	FALSE	FOXO4	31.73214286	56	0	0	0.7135506	TF_other	FALSE	0	FOXO4	989554	0.06209011
219	3.08805031	1.94E-05	0.32382892	0	6	5	FALSE	ABHD16B	126	6	0	0	0.65199161	down	FALSE	0	ABHD16B	26976	0.27173913
220	2.43853631	0.0134572	0.41008206	0.01314035	178	5	FALSE	CREB1	31.07865169	178	0	0	0.76024395	TF_other	FALSE	0	CREB1	8384350	0.03899076
222	2.94053745	6.29E-04	0.34007389	0	51	5	FALSE	ER-alpha	24.60784314	51	0	0	0.67657709	TF_other	FALSE	0	ER-alpha	726214	0.10175794
224	2.78273299	8.16E-04	0.35935895	0.01572618	47	5	FALSE	BACH2	29.59574468	47	0	0	0.70287783	TF_other	FALSE	0	BACH2	513200	0.07045607
227	2.64265294	0.00364884	0.37840762	0.00760556	124	5	FALSE	deltaCREB	29.52419355	124	0	0	0.72622451	TF_other	FALSE	0	deltaCREB	4004852	0.05623196
229	2.52201258	0.01106099	0.39650873	0.00782594	153	4	FALSE	ESR1	26.00653595	153	0	0	0.74633124	TF_other	FALSE	0	ESR1	7563520	0.03954096
231	2.48198971	6.98E-04	0.40290256	0.00853485	38	5	FALSE	ABI3	87.57894737	38	0	0	0.75300172	up	FALSE	0	ABI3	656962	0.09259675
233	2.76558033	0.00217609	0.36158776	0.0045614	76	4	FALSE	STAT2	25.46052632	76	0	0	0.70573661	TF_other	FALSE	0	STAT2	1922394	0.06179923
237	2.79874214	5.33E-04	0.35730337	0.00408163	50	5	FALSE	CBFB	29.9	50	0	0	0.70020964	TF_other	FALSE	0	CBFB	622218	0.07718085
239	2.78845054	7.02E-04	0.3586221	0.00362845	53	5	FALSE	NFYB	29.03773585	53	0	0	0.70192491	TF_other	FALSE	0	NFYB	717458	0.07330975
242	2.83304746	7.91E-04	0.35297679	0.01088534	53	4	FALSE	GATA-3	26.90566038	53	0	0	0.69449209	TF_other	FALSE	0	GATA-3	770436	0.07259708
244	2.78502001	7.07E-04	0.35906385	0.00362845	53	5	FALSE	NFYA	29.50943396	53	0	0	0.70249666	TF_other	FALSE	0	NFYA	710634	0.07376969
246	2.78845054	0.00256872	0.3586221	0.0043036	72	5	FALSE	SPZ1	33	72	0	0	0.70192491	TF_other	FALSE	0	SPZ1	1971388	0.08420593
248	2.72784448	8.20E-04	0.36658981	0.01256831	61	5	FALSE	STAT1alpha	35.40983607	61	0	0	0.71202592	TF_other	FALSE	0	STAT1alpha	728568	0.07459898
250	2.68839337	0.00220459	0.37196937	0.01040253	67	5	FALSE	STAT6	28.85074627	67	0	0	0.71860111	TF_other	FALSE	0	STAT6	1069854	0.05438956
252	2.76386507	0.00133308	0.36181216	0.0056338	71	5	FALSE	NF-Y	28.33802817	71	0	0	0.70602249	TF_other	FALSE	0	NF-Y	1278552	0.06890466
254	2.72269868	0.00164211	0.36728265	0.00633198	67	5	FALSE	PTK7	28.32835821	67	0	0	0.71288355	TF_other	FALSE	0	PTK7	1752722	0.06065488
257	2.93539165	6.04E-04	0.34067004	0	33	5	FALSE	POU3F1	26.45454545	33	0	0	0.67743472	TF_other	FALSE	0	POU3F1	478966	0.10021475
260	2.22527158	0.0056536	0.44938335	0.07738095	64	4	FALSE	STAT4	70.734375	64	0	0	0.79578807	TF_up	FALSE	0	STAT4	956000	0.05445878
262	2.58604917	0.01187163	0.38669025	0.00377816	168	4	FALSE	CEBPA	26.36904762	168	0	0	0.73565847	TF_other	FALSE	0	CEBPA	8652906	0.04812159
266	2.72784448	8.20E-04	0.36658981	0.01256831	61	5	FALSE	STAT1beta	35.40983607	61	0	0	0.71202592	TF_other	FALSE	0	STAT1beta	728568	0.07459898
268	2.56032018	0.00554067	0.39057615	0.01661688	104	4	FALSE	STAT3	33.19230769	104	0	0	0.73994664	TF_other	FALSE	0	STAT3	3180022	0.04857772
270	2.67467124	0.00498982	0.37387773	0.00837629	97	4	FALSE	STAT5A	28.42268041	97	0	0	0.72088813	TF_other	FALSE	0	STAT5A	2915522	0.05474512
272	2.68782161	0.00422279	0.3720485	0.00512821	130	4	FALSE	C/EBPalpha	28.11538462	130	0	0	0.7186964	TF_other	FALSE	0	C/EBPalpha	4571868	0.06159032
274	2.84391081	0.00146749	0.35162847	0	54	5	FALSE	RREB1	27.46296296	54	0	0	0.69268153	TF_other	FALSE	0	RREB1	1080980	0.08192868
276	2.82790166	2.74E-04	0.35361909	0.00793651	36	5	FALSE	CP1C	31.72222222	36	0	0	0.69534972	TF_other	FALSE	0	CP1C	310240	0.0865235
279	2.66838193	0.00235345	0.37475895	0.01056338	72	5	FALSE	SRF	29.75	72	0	0	0.72193634	TF_other	FALSE	0	SRF	2100292	0.05408132
281	2.86678102	0.00205255	0.34882329	6.05E-04	58	5	FALSE	IRF1	23.89655172	58	0	0	0.68886983	TF_other	FALSE	0	IRF1	1379618	0.07720887
284	2.61578045	0.00902597	0.38229508	0.00577508	141	4	FALSE	POU2F1	24.71631206	141	0	0	0.73070326	TF_other	FALSE	0	POU2F1	5824412	0.04500563
286	2.79874214	5.33E-04	0.35730337	0.00408163	50	5	FALSE	CP1A	29.9	50	0	0	0.70020964	TF_other	FALSE	0	CP1A	622218	0.07718085
288	2.82504288	3.10E-04	0.35397693	0.00750751	37	5	FALSE	NFYC	31.08108108	37	0	0	0.69582619	TF_other	FALSE	0	NFYC	318666	0.08424302
292	2.89251001	0.00134773	0.3457205	0	52	5	FALSE	IRF2	25.51923077	52	0	0	0.68458167	TF_other	FALSE	0	IRF2	1024110	0.09047687
294	2.76615209	6.77E-04	0.36151302	0.01098039	51	4	FALSE	STAT5B	32.74509804	51	0	0	0.70564132	TF_other	FALSE	0	STAT5B	444402	0.07199824
296	3.38021727	3.06E-06	0.29583897	0	2	5	FALSE	ACADL	125	2	0	0	0.60329712	down	FALSE	0	ACADL	2728	0.51882845
297	2.47970269	0.01761185	0.40327415	0.00459377	194	4	FALSE	PRDM14	21.94329897	194	0	0	0.75338289	TF_other	FALSE	0	PRDM14	12081902	0.03274385
299	2.81360778	0.00316983	0.35541557	0.0025974	56	5	FALSE	PPARA	25.25	56	0	0	0.69773204	TF_other	FALSE	0	PPARA	1842114	0.0691457
301	2.52144082	2.56E-04	0.39659864	0.06926407	22	5	FALSE	ACADVL	104.7727273	22	0	0	0.74642653	up	FALSE	0	ACADVL	217686	0.11621786
302	2.04116638	0.03258878	0.48991597	0.05986161	178	4	FALSE	FOS	52.53932584	178	0	0	0.82647227	TF_up	FALSE	0	FOS	3688960	0.0352397
304	2.62206975	0.00338044	0.38137811	0.00680863	118	5	FALSE	E2F	30.43220339	118	0	0	0.72965504	TF_other	FALSE	0	E2F	3157200	0.05517122
307	2.946255	1.53E-04	0.33941393	0	34	5	FALSE	RNASEH2A	28.61764706	34	0	0	0.67562417	TF_other	FALSE	0	RNASEH2A	52602	0.11365287
309	2.79874214	7.97E-04	0.35730337	0.01445578	49	5	FALSE	BACH1	32.85714286	49	0	0	0.70020964	TF_other	FALSE	0	BACH1	682968	0.08391794
312	2.85305889	6.75E-04	0.350501	0.00377074	52	5	FALSE	ZNF423	27.71153846	52	0	0	0.69115685	TF_other	FALSE	0	ZNF423	789742	0.08209833
315	2.79817038	0.00340498	0.35737638	4.48E-04	95	5	FALSE	PPAR-gamma1	23.2	95	0	0	0.70030494	TF_other	FALSE	0	PPAR-gamma1	3825022	0.06904217
318	2.72269868	0.00164257	0.36728265	0.00273598	86	5	FALSE	JUND	27.77906977	86	0	0	0.71288355	TF_other	FALSE	0	JUND	447812	0.06272023
320	2.79817038	0.00340498	0.35737638	4.48E-04	95	5	FALSE	PPAR-gamma2	23.2	95	0	0	0.70030494	TF_other	FALSE	0	PPAR-gamma2	3825022	0.06904217
322	2.95082905	9.75E-04	0.33888781	0	39	5	FALSE	IRF-7A	24.79487179	39	0	0	0.67486183	TF_other	FALSE	0	IRF-7A	743670	0.10670346
324	2.16352201	0.00604258	0.4622093	0.07601078	106	4	FALSE	FOSB	58.67924528	106	0	0	0.80607966	TF_up	FALSE	0	FOSB	1197762	0.0431148
326	2.94739851	0.00117389	0.33928225	0	47	5	FALSE	HNF-4alpha2	23.70212766	47	0	0	0.67543358	TF_other	FALSE	0	HNF-4alpha2	1203890	0.0966048
328	2.81246427	4.68E-04	0.35556007	0.0179704	44	5	FALSE	MRPL36	34.84090909	44	0	0	0.69792262	TF_other	FALSE	0	MRPL36	421996	0.09133333
330	2.8759291	2.26E-04	0.34771372	0	37	5	FALSE	FOSL1	30.91891892	37	0	0	0.68734515	TF_other	FALSE	0	FOSL1	66250	0.09349662
332	2.45740423	0.0132459	0.40693346	0.01726194	179	4	FALSE	JUN	28.22905028	179	0	0	0.75709929	TF_other	FALSE	0	JUN	6451366	0.03584432
336	2.12121212	0.01099409	0.47142857	0.06408346	122	4	FALSE	JUNB	60.46721311	122	0	0	0.81313131	TF_up	FALSE	0	JUNB	1830330	0.04277736
338	2.81246427	4.68E-04	0.35556007	0.0179704	44	5	FALSE	BRIP1	34.84090909	44	0	0	0.69792262	TF_other	FALSE	0	BRIP1	421996	0.09133333
340	2.40994854	2.89E-04	0.41494662	0.09782609	24	4	FALSE	ACAP1	112.4583333	24	0	0	0.76500858	up	FALSE	0	ACAP1	266218	0.10894013
342	2.83076043	9.64E-04	0.35326197	0.00626566	57	5	FALSE	Meis-1	28.63157895	57	0	0	0.69487326	TF_other	FALSE	0	Meis-1	1008766	0.08207835
366	3.30931961	2.90E-06	0.30217692	0	4	5	FALSE	ACOT6	168	4	0	0	0.6151134	down	FALSE	0	ACOT6	8238	0.54397394
367	2.53459119	0.00776619	0.39454094	0.00620188	168	5	FALSE	AHR	29.66666667	168	0	0	0.7442348	TF_other	FALSE	0	AHR	7910420	0.04722287
369	2.47970269	0.00990145	0.40327415	0.00668338	190	4	FALSE	ARNT	30.37368421	190	0	0	0.75338289	TF_other	FALSE	0	ARNT	9812698	0.04482786
371	2.51172098	0.00828163	0.39813339	0.00558557	182	4	FALSE	MIA3	29.42857143	182	0	0	0.7480465	TF_other	FALSE	0	MIA3	9046382	0.04629319
374	2.57975986	1.55E-04	0.38763298	0.04444444	10	5	FALSE	ACP5	160.8	10	0	0	0.73670669	up	FALSE	0	ACP5	137858	0.17671082
377	2.85534591	5.35E-04	0.35022026	0.01666667	16	4	FALSE	MITF	34.6875	16	0	0	0.69077568	TF_other	FALSE	0	MITF	236194	0.09923246
379	2.96226415	1.57E-04	0.33757962	0.00952381	15	5	FALSE	SFPI1	27.26666667	15	0	0	0.67295597	TF_other	FALSE	0	SFPI1	32222	0.11
381	2.26643796	0.01395904	0.44122099	0.04496033	83	4	FALSE	SPI1	53.80722892	83	0	0	0.78892701	TF_up	FALSE	0	SPI1	1121812	0.04484829
388	2.46483705	3.53E-04	0.40570633	0	16	5	FALSE	ACSL1	180.625	16	0	0	0.75586049	up	FALSE	0	ACSL1	575656	0.1720546
393	2.62721555	0.00367467	0.38063112	0.00949495	100	4	FALSE	NF-kappaB1	26.91	100	0	0	0.72879741	TF_other	FALSE	0	NF-kappaB1	2775514	0.04739602
395	2.83476272	0.00204746	0.35276321	6.02E-04	82	5	FALSE	TFAP4	26.09756098	82	0	0	0.69420621	TF_other	FALSE	0	TFAP4	1942836	0.08240704
398	2.83590623	9.69E-04	0.35262097	0.02371542	23	5	FALSE	PPARG	36.39130435	23	0	0	0.69401563	TF_other	FALSE	0	PPARG	374418	0.09555917
408	2.58833619	2.55E-04	0.38634858	0	18	5	FALSE	ACSL4	124.7777778	18	0	0	0.7352773	up	FALSE	0	ACSL4	293092	0.13252439
409	2.63579188	0.00345433	0.37939262	0.01128713	101	5	FALSE	ATF-2	30.35643564	101	0	0	0.72736802	TF_other	FALSE	0	ATF-2	2797064	0.05271182
412	2.77987421	7.26E-04	0.35972851	0.02298851	58	5	FALSE	Egr-2	30.98275862	58	0	0	0.7033543	TF_other	FALSE	0	Egr-2	780322	0.07234858
414	2.7186964	0.0014535	0.36782334	0.00689223	57	4	FALSE	SREBP-1b	32.85964912	57	0	0	0.7135506	TF_other	FALSE	0	SREBP-1b	1424762	0.06783873
416	2.98170383	2.52E-04	0.33537872	0	28	5	FALSE	ZIC1	28.71428571	28	0	0	0.66971603	TF_other	FALSE	0	ZIC1	306300	0.13324176
419	2.6163522	0.00477331	0.38221154	0.01118761	84	5	FALSE	YY1	27.32142857	84	0	0	0.73060797	TF_other	FALSE	0	YY1	2673440	0.04414191
423	2.67695826	0.00559055	0.37355831	0.00569029	122	4	FALSE	ZEB1	23.75409836	122	0	0	0.72050696	TF_other	FALSE	0	ZEB1	4363206	0.04914537
425	2.7186964	0.0014535	0.36782334	0.00689223	57	4	FALSE	SREBP-1a	32.85964912	57	0	0	0.7135506	TF_other	FALSE	0	SREBP-1a	1424762	0.06783873
427	2.91881075	0.00176099	0.34260529	0.00332226	43	5	FALSE	ZIC3	22.55813953	43	0	0	0.68019821	TF_other	FALSE	0	ZIC3	1045198	0.0860096
429	2.77758719	8.85E-04	0.3600247	0.02220923	59	5	FALSE	EGR2	30.59322034	59	0	0	0.70373547	TF_other	FALSE	0	EGR2	953312	0.07123441
431	2.78044597	5.72E-04	0.35965453	0.02480339	58	5	FALSE	EGR3	31.4137931	58	0	0	0.70325901	TF_other	FALSE	0	EGR3	514504	0.07297232
433	2.90680389	3.90E-04	0.34402046	0	29	5	FALSE	ZIC2	28.34482759	29	0	0	0.68219935	TF_other	FALSE	0	ZIC2	275408	0.09801013
437	2.88279017	7.64E-04	0.34688616	0.00386473	46	5	FALSE	FOXJ2	27.97826087	46	0	0	0.68620164	TF_other	FALSE	0	FOXJ2	665128	0.08626419
439	2.31903945	5.47E-04	0.43121302	0.06842105	20	4	FALSE	ACSL5	168.9	20	0	0	0.78016009	up	FALSE	0	ACSL5	699014	0.14065109
446	2.14465409	0.01644287	0.46627566	0.07823724	102	4	FALSE	PLAU	60.49019608	102	0	0	0.80922432	TF_up	FALSE	0	PLAU	1519196	0.04352036
450	2.77644368	6.56E-04	0.36017298	0.03589744	66	5	FALSE	Egr-1	32.98484848	66	0	0	0.70392605	TF_other	FALSE	0	Egr-1	304482	0.0754802
452	2.89822756	9.94E-04	0.34503847	0.00193237	46	4	FALSE	AML1a	21.15217391	46	0	0	0.68362874	TF_other	FALSE	0	AML1a	654668	0.07325142
454	2.99885649	1.72E-04	0.33346044	0	20	5	FALSE	SOX5	24.65	20	0	0	0.66685725	TF_other	FALSE	0	SOX5	125098	0.12128205
459	2.87707261	5.06E-04	0.34757552	0.00269906	39	4	FALSE	DDIT3	32.41025641	39	0	0	0.68715456	TF_other	FALSE	0	DDIT3	693882	0.09839744
463	2.85077187	0.00142272	0.35078219	0.00324675	56	5	FALSE	TLX2	24.05357143	56	0	0	0.69153802	TF_other	FALSE	0	TLX2	1079590	0.07506935
465	2.08805031	0.02553046	0.47891566	0.08207547	160	4	FALSE	EGR1	55.6375	160	0	0	0.81865828	TF_up	FALSE	0	EGR1	2989592	0.03878138
467	2.6918239	0.00151659	0.37149533	0	9	5	FALSE	ACTA2	153.5555556	9	0	0	0.71802935	up	FALSE	0	ACTA2	852608	0.18402359
468	3.18696398	7.74E-06	0.31377826	0	3	5	FALSE	HEY1	24.66666667	3	0	0	0.635506	TF_other	FALSE	0	HEY1	3376	0.35858586
470	2.68953688	0.00458361	0.37181122	0.0055991	95	4	FALSE	MYB	25.61052632	95	0	0	0.71841052	TF_other	FALSE	0	MYB	3468444	0.05184211
474	3.69125214	0	0.27091078	0	1	6	FALSE	HEY2	9	1	0	0	0.55145798	TF_other	FALSE	0	HEY2	0	0
478	3.04116638	1.63E-05	0.32882121	0	4	5	FALSE	RBPJ	45	4	0	0	0.6598056	TF_other	FALSE	0	RBPJ	6606	0.29139073
481	2.37964551	0.00438396	0.42023066	0.01449275	24	5	FALSE	ADA	132.6666667	24	0	0	0.77005908	up	FALSE	0	ADA	1024974	0.12132015
485	3.1509434	5.92E-06	0.31736527	0	3	5	FALSE	NFI	34.66666667	3	0	0	0.64150943	TF_other	FALSE	0	NFI	1204	0.39147287
487	3.189251	6.29E-06	0.31355324	0	2	5	FALSE	CDX1	39.5	2	0	0	0.63512483	TF_other	FALSE	0	CDX1	888	0.52027027
494	3.37907376	0	0.29593909	0	1	6	FALSE	PDX1	24	1	0	0	0.60348771	TF_other	FALSE	0	PDX1	0	0
496	3.23727844	6.37E-06	0.30890145	0	4	5	FALSE	GATA4	21.25	4	0	0	0.62712026	TF_other	FALSE	0	GATA4	7530	0.30223881
499	3.01143511	1.23E-04	0.33206759	0	13	5	FALSE	NFIC	29.15384615	13	0	0	0.66476082	TF_other	FALSE	0	NFIC	28054	0.14896215
503	3.13664951	5.15E-05	0.31881152	0	6	5	FALSE	NFIA	20.33333333	6	0	0	0.64389175	TF_other	FALSE	0	NFIA	24324	0.2078853
506	2.92567181	9.14E-04	0.34180184	0	39	5	FALSE	TP73	23.84615385	39	0	0	0.6790547	TF_other	FALSE	0	TP73	736138	0.09175162
508	3.37907376	0	0.29593909	0	1	6	FALSE	IPF1	24	1	0	0	0.60348771	TF_other	FALSE	0	IPF1	0	0
511	3.08347627	7.70E-05	0.32430929	0	9	5	FALSE	LEF1	21.44444444	9	0	0	0.65275395	TF_other	FALSE	0	LEF1	29210	0.15257048
513	2.29045169	0.00367601	0.43659511	0.04634146	41	4	FALSE	TP63	97.82926829	41	0	0	0.78492472	TF_down	FALSE	0	TP63	1215426	0.08094968
516	3.05546026	0	0.32728293	0	1	5	FALSE	ADAM6	508	1	0	0	0.65742329	up	FALSE	0	ADAM6	0	0
518	3.053745	1.68E-05	0.32746677	0	4	5	FALSE	ADAMDEC1	149	4	0	0	0.65770917	up	FALSE	0	ADAMDEC1	21360	0.29540918
520	2.90623213	8.69E-04	0.34408814	0	37	5	FALSE	HSF1	26.05405405	37	0	0	0.68229464	TF_other	FALSE	0	HSF1	677040	0.09143815
522	2.30360206	0.03470622	0.43410276	0.00336681	322	4	FALSE	GATA1	21.13975155	322	0	0	0.78273299	TF_other	FALSE	0	GATA1	25082548	0.02811219
524	2.74785592	8.71E-04	0.3639201	0.01604278	34	4	FALSE	HSF2	35.70588235	34	0	0	0.70869068	TF_other	FALSE	0	HSF2	502930	0.07494647
526	2.49399657	2.26E-04	0.40096286	0.0989011	14	4	FALSE	ADAMTS1	133.0714286	14	0	0	0.75100057	up	FALSE	0	ADAMTS1	185874	0.14520163
529	2.26872499	0.00173804	0.44077621	0.04694168	38	4	FALSE	EZH2	132.4736842	38	0	0	0.78854584	TF_up	FALSE	0	EZH2	1498934	0.10668621
531	2.12121212	0.02062213	0.47142857	0.06678315	102	4	FALSE	HIF1A	61.29411765	102	0	0	0.81313131	TF_up	FALSE	0	HIF1A	2051624	0.0427876
533	2.56089194	0.0066902	0.39048895	0.00535714	161	4	FALSE	Pax-5	28.51552795	161	0	0	0.73985134	TF_other	FALSE	0	Pax-5	7272846	0.04834386
539	2.50600343	0.00102311	0.39904175	0.14666667	25	4	FALSE	PGR	83.12	25	0	0	0.74899943	TF_down	FALSE	0	PGR	161424	0.096
542	2.51172098	0.00771197	0.39813339	0.00890319	164	4	FALSE	PAX5	29.5	164	0	0	0.7480465	TF_other	FALSE	0	PAX5	7604212	0.0434212
545	2.96226415	1.24E-04	0.33757962	0	15	5	FALSE	ERG	32.86666667	15	0	0	0.67295597	TF_other	FALSE	0	ERG	40382	0.13445851
547	2.4002287	6.16E-04	0.41662697	0.04734848	33	4	FALSE	ADAMTS5	111.5151515	33	0	0	0.76662855	up	FALSE	0	ADAMTS5	665208	0.10736349
549	2.92224128	9.04E-05	0.34220309	0	11	5	FALSE	SIRT1	42.09090909	11	0	0	0.67962645	TF_other	FALSE	0	SIRT1	25634	0.14942149
554	2.80674671	9.06E-04	0.35628438	0.00570676	68	5	FALSE	NF-1	27.61764706	68	0	0	0.69887555	TF_other	FALSE	0	NF-1	303054	0.07555924
556	2.63007433	0.00669041	0.38021739	0.00711125	113	5	FALSE	CEBPB	27.04424779	113	0	0	0.72832095	TF_other	FALSE	0	CEBPB	4137744	0.04872173
559	2.76843911	0.00244345	0.36121437	0.0037037	81	5	FALSE	C/EBPbeta	26.32098765	81	0	0	0.70526015	TF_other	FALSE	0	C/EBPbeta	2184588	0.06517003
561	2.84162379	2.41E-04	0.35191147	0.0031746	36	5	FALSE	E2F-3a	33.94444444	36	0	0	0.6930627	TF_other	FALSE	0	E2F-3a	320410	0.09714052
567	2.16695254	0.01251988	0.46147757	0.07465347	101	4	FALSE	MECOM	55.45544554	101	0	0	0.80550791	TF_up	FALSE	0	MECOM	1377966	0.04083702
571	2.14293882	0.01413234	0.46664888	0.08658009	99	4	FALSE	NF1	64.96969697	99	0	0	0.8095102	TF_up	FALSE	0	NF1	1660262	0.04633054
575	2.84048027	3.03E-04	0.35205314	0.003003	37	5	FALSE	E2F5	33.24324324	37	0	0	0.69325329	TF_other	FALSE	0	E2F5	396870	0.09507154
583	2.88336192	2.22E-04	0.34681737	0.01709402	27	5	FALSE	HOXA9B	31.07407407	27	0	0	0.68610635	TF_other	FALSE	0	HOXA9B	284538	0.09880565
585	2.83933676	3.18E-04	0.35219493	0.00284495	38	5	FALSE	E2F2	32.94736842	38	0	0	0.69344387	TF_other	FALSE	0	E2F2	416120	0.09419505
588	2.87821612	2.80E-04	0.34743743	0.01587302	28	5	FALSE	HOXA9	30.64285714	28	0	0	0.68696398	TF_other	FALSE	0	HOXA9	298504	0.09581044
592	2.39908519	2.20E-04	0.41682555	0.08496732	18	4	FALSE	ADAMTS7	162.8333333	18	0	0	0.76681913	up	FALSE	0	ADAMTS7	391700	0.15139277
604	2.84962836	9.61E-04	0.35092295	0.00779221	56	5	FALSE	HMX3	28.51785714	56	0	0	0.69172861	TF_other	FALSE	0	HMX3	1012666	0.08378291
607	2.84962836	9.61E-04	0.35092295	0.00779221	56	5	FALSE	PELP1	28.51785714	56	0	0	0.69172861	TF_other	FALSE	0	PELP1	1012666	0.08378291
612	2.80731847	7.55E-04	0.35621181	0.00707071	45	5	FALSE	ARP-1	30.55555556	45	0	0	0.69878026	TF_other	FALSE	0	ARP-1	547660	0.07743056
614	2.93081761	5.50E-06	0.34120172	0.2	6	5	FALSE	ADAMTS9-AS2	84.5	6	0	0	0.67819706	down	FALSE	0	ADAMTS9-AS2	2300	0.31405473
620	2.20011435	0.00329456	0.45452183	0.11466165	57	4	FALSE	IKZF1	114.7719298	57	0	0	0.79998094	TF_up	FALSE	0	IKZF1	1963448	0.08535662
622	2.72841624	4.70E-05	0.36651299	0	7	5	FALSE	ADCY4	196	7	0	0	0.71193063	up	FALSE	0	ADCY4	91184	0.24163569
628	2.72841624	0.00331125	0.36651299	0.00347661	113	5	FALSE	MZF1	28.31858407	113	0	0	0.71193063	TF_other	FALSE	0	MZF1	3698052	0.06537322
630	2.74156661	0.00310294	0.36475495	0.0034398	111	5	FALSE	ZSCAN1	27.97297297	111	0	0	0.7097389	TF_other	FALSE	0	ZSCAN1	3584052	0.0667375
632	2.33733562	0.00184962	0.42783757	0.02564103	27	5	FALSE	ADM	135.6666667	27	0	0	0.77711073	up	FALSE	0	ADM	974722	0.1172518
635	2.77587193	8.59E-04	0.36024717	0.01103896	56	4	FALSE	GATA-2	28.60714286	56	0	0	0.70402135	TF_other	FALSE	0	GATA-2	904000	0.06475804
637	2.98399085	3.94E-04	0.33512167	0	28	5	FALSE	BPTF	24.21428571	28	0	0	0.66933486	TF_other	FALSE	0	BPTF	343036	0.10797342
640	2.82790166	0.00210006	0.35361909	9.26E-04	81	5	FALSE	LMO2	23.61728395	81	0	0	0.69534972	TF_other	FALSE	0	LMO2	1831350	0.07431694
642	2.95025729	2.66E-04	0.33895349	0.0026455	28	5	FALSE	NKX2-2	27.10714286	28	0	0	0.67495712	TF_other	FALSE	0	NKX2-2	256750	0.10773075
646	2.38250429	0.00439963	0.41972642	0.07982583	53	4	FALSE	PAX3	57.05660377	53	0	0	0.76958262	TF_up	FALSE	0	PAX3	451554	0.0541443
648	2.79016581	9.27E-04	0.35840164	0.0148448	39	5	FALSE	TFAP2A	30.38461538	39	0	0	0.70163903	TF_other	FALSE	0	TFAP2A	423738	0.0708647
657	2.84048027	0.00251717	0.35205314	0.00351185	68	5	FALSE	Pax-2	25.5	68	0	0	0.69325329	TF_other	FALSE	0	Pax-2	1663762	0.07514347
660	2.7352773	0.00130177	0.36559365	0.02443609	57	4	FALSE	EPAS1	29.33333333	57	0	0	0.71078712	TF_other	FALSE	0	EPAS1	612904	0.06129153
664	3.33676387	0	0.29969157	0	1	6	FALSE	GTF3A	27	1	0	0	0.61053936	TF_other	FALSE	0	GTF3A	0	0
666	2.82046884	0.00415385	0.35455098	9.77E-04	91	5	FALSE	CUX1	24.30769231	91	0	0	0.69658853	TF_other	FALSE	0	CUX1	3303100	0.07717695
670	2.39622642	5.03E-04	0.41732283	0.0591133	29	4	FALSE	ADRB2	116.4137931	29	0	0	0.7672956	up	FALSE	0	ADRB2	552832	0.10888271
698	2.82675815	9.73E-04	0.35376214	0.00809717	39	4	FALSE	TFCP2	32.07692308	39	0	0	0.69554031	TF_other	FALSE	0	TFCP2	554700	0.08477521
701	2.81303602	8.80E-07	0.3554878	0.66666667	3	5	FALSE	AHSP	303.3333333	3	0	0	0.69782733	up	FALSE	0	AHSP	3794	0.4964539
705	2.7084048	2.18E-04	0.36922103	0	10	5	FALSE	AIF1	147.3	10	0	0	0.71526587	up	FALSE	0	AIF1	128464	0.17754854
706	3.06403659	8.24E-05	0.32636686	0	16	5	FALSE	LHX3a	24.5625	16	0	0	0.6559939	TF_other	FALSE	0	LHX3a	99882	0.14280303
709	2.94225272	3.03E-04	0.33987563	0.002849	27	5	FALSE	FOXD1	24.25925926	27	0	0	0.67629121	TF_other	FALSE	0	FOXD1	173048	0.09296149
712	3.06403659	8.24E-05	0.32636686	0	16	5	FALSE	LHX3b	24.5625	16	0	0	0.6559939	TF_other	FALSE	0	LHX3b	99882	0.14280303
715	2.76443682	0.00373432	0.36173733	0.00837139	73	4	FALSE	POU3F2	27.34246575	73	0	0	0.7059272	TF_other	FALSE	0	POU3F2	2062430	0.06173896
719	3.05488851	1.87E-04	0.32734419	0	22	5	FALSE	ARID5B	16.72727273	22	0	0	0.65751858	TF_other	FALSE	0	ARID5B	201268	0.10415412
721	2.41680961	2.34E-04	0.41376863	0.03296703	14	4	FALSE	AIG1	182.6428571	14	0	0	0.76386507	down	FALSE	0	AIG1	364786	0.16970949
729	2.64951401	0.00511077	0.37742771	0.00375807	131	4	FALSE	TCF3	27.86259542	131	0	0	0.725081	TF_other	FALSE	0	TCF3	4894068	0.05630763
733	2.96569468	3.31E-04	0.33718913	0	29	5	FALSE	FOXI1	26.65517241	29	0	0	0.67238422	TF_other	FALSE	0	FOXI1	251270	0.11106135
736	2.87364208	3.20E-04	0.34799045	0.01	25	4	FALSE	HOXA3	31.96	25	0	0	0.68772632	TF_other	FALSE	0	HOXA3	154666	0.09892063
739	2.44425386	3.76E-04	0.40912281	0	15	5	FALSE	AIM1	197.1333333	15	0	0	0.75929102	up	FALSE	0	AIM1	622848	0.18468299
743	2.65809034	0.00262021	0.37620994	0.01009901	101	4	FALSE	AP-2gamma	29.58415842	101	0	0	0.72365161	TF_other	FALSE	0	AP-2gamma	2963520	0.05473566
752	2.8542024	0.00138232	0.35036058	0.01008403	35	4	FALSE	CTNNB1	23.54285714	35	0	0	0.69096627	TF_other	FALSE	0	CTNNB1	709236	0.06891775
755	2.66895369	0.00196539	0.37467866	0.00966562	88	4	FALSE	AP-2alphaA	29.86363636	88	0	0	0.72184105	TF_other	FALSE	0	AP-2alphaA	2259264	0.05531449
758	2.52086907	1.08E-04	0.39668859	0	5	5	FALSE	AIM2	345.8	5	0	0	0.74652182	up	FALSE	0	AIM2	236938	0.34653266
764	2.82847341	1.70E-04	0.3535476	0	7	5	FALSE	AKR1C1	167	7	0	0	0.69525443	down	FALSE	0	AKR1C1	65598	0.23782235
767	2.99028016	8.82E-05	0.33441683	0	12	5	FALSE	POU1F1	27.33333333	12	0	0	0.66828664	TF_other	FALSE	0	POU1F1	22248	0.12599681
770	3.21497999	1.22E-04	0.31104393	0	5	5	FALSE	NFE2L2	15.6	5	0	0	0.63083667	TF_other	FALSE	0	NFE2L2	34620	0.292
774	2.8376215	6.43E-05	0.35240782	0.1	5	5	FALSE	AKR1C2	122.4	5	0	0	0.69372975	down	FALSE	0	AKR1C2	4038	0.21368421
777	2.89822756	3.79E-05	0.34503847	0.13333333	6	5	FALSE	TWIST1	66.83333333	6	0	0	0.68362874	TF_other	FALSE	0	TWIST1	5446	0.21329046
780	2.89822756	3.79E-05	0.34503847	0.13333333	6	5	FALSE	TWIST2	66.83333333	6	0	0	0.68362874	TF_other	FALSE	0	TWIST2	5446	0.21329046
782	2.67124071	3.07E-04	0.37435788	0.1	5	5	FALSE	ALAS2	212	5	0	0	0.72145988	up	FALSE	0	ALAS2	49976	0.30549133
784	3.34934248	5.90E-07	0.29856606	0	2	5	FALSE	KLF3	21.5	2	0	0	0.60844292	TF_other	FALSE	0	KLF3	230	0.52564103
789	2.46941109	3.14E-04	0.40495485	0.01960784	18	5	FALSE	ALDH1A2	150.1666667	18	0	0	0.75509815	up	FALSE	0	ALDH1A2	370560	0.14953843
790	3.03716409	8.89E-05	0.32925452	0	21	5	FALSE	BAX	19.33333333	21	0	0	0.66047265	TF_other	FALSE	0	BAX	55362	0.11178862
792	2.77129788	0.0014508	0.36084176	0.00523139	71	5	FALSE	MYOD1	27.98591549	71	0	0	0.70478369	TF_other	FALSE	0	MYOD1	1426810	0.06881797
796	2.8913665	1.45E-04	0.34585723	0.00865801	22	5	FALSE	NKX3-1	26.54545455	22	0	0	0.68477225	TF_other	FALSE	0	NKX3-1	64494	0.08735312
801	2.81875357	0.00186172	0.35476673	4.66E-04	66	5	FALSE	EP300	25.46969697	66	0	0	0.6968744	TF_other	FALSE	0	EP300	1510362	0.07335329
812	2.69982847	0.00280065	0.3703939	0.05833333	16	5	FALSE	ALOX5	73.75	16	0	0	0.71669525	up	FALSE	0	ALOX5	442528	0.10949178
814	3.19096627	1.38E-05	0.3133847	0	4	5	FALSE	HDAC2	21.75	4	0	0	0.63483896	TF_other	FALSE	0	HDAC2	3514	0.30514706
819	3.34305317	1.01E-05	0.29912776	0	3	5	FALSE	NR2F1	12.66666667	3	0	0	0.60949114	TF_other	FALSE	0	NR2F1	810	0.34313725
822	3.32018296	1.54E-06	0.30118822	0	2	5	FALSE	MBD1	15.5	2	0	0	0.61330284	TF_other	FALSE	0	MBD1	356	0.51785714
826	3.0806175	2.05E-05	0.32461024	0	4	5	FALSE	HDAC3	42.25	4	0	0	0.65323042	TF_other	FALSE	0	HDAC3	4408	0.32738095
828	3.24185249	8.16E-06	0.30846561	0	3	5	FALSE	RORA	20.66666667	3	0	0	0.62635792	TF_other	FALSE	0	RORA	2262	0.35757576
830	3.69925672	0	0.27032457	0	1	6	FALSE	MECP2	16	1	0	0	0.55012388	TF_other	FALSE	0	MECP2	0	0
832	3.08347627	4.05E-05	0.32430929	0	7	5	FALSE	VDR	29.57142857	7	0	0	0.65275395	TF_other	FALSE	0	VDR	12260	0.20408163
834	3.36821041	2.03E-06	0.29689357	0	2	6	FALSE	MBD2	18.5	2	0	0	0.60529827	TF_other	FALSE	0	MBD2	520	0.51470588
837	2.35734706	6.83E-04	0.42420568	0.04166667	16	5	FALSE	ALOX5AP	180.625	16	0	0	0.77377549	up	FALSE	0	ALOX5AP	568978	0.15887026
846	3.07432819	2.30E-06	0.32527432	0.33333333	3	5	FALSE	CEBPE	50.66666667	3	0	0	0.65427864	TF_other	FALSE	0	CEBPE	148	0.37844612
854	3.00971984	8.11E-05	0.33225684	0	11	5	FALSE	CEBPD	36.36363636	11	0	0	0.66504669	TF_other	FALSE	0	CEBPD	17682	0.18418561
856	2.86792453	1.14E-05	0.34868421	0	2	5	FALSE	ALS2CR11	419.5	2	0	0	0.68867925	down	FALSE	0	ALS2CR11	31166	0.60917031
859	2.48141795	5.38E-04	0.40299539	0.01424501	27	5	FALSE	AMBN	98.96296296	27	0	0	0.75309701	down	FALSE	0	AMBN	401896	0.1002913
860	3.00400229	1.36E-04	0.33288923	0	23	5	FALSE	RORalpha2	26.39130435	23	0	0	0.66599962	TF_other	FALSE	0	RORalpha2	131916	0.1263249
862	2.97712979	1.11E-04	0.33589399	0	27	5	FALSE	POU2F2C	31.14814815	27	0	0	0.67047837	TF_other	FALSE	0	POU2F2C	73016	0.13641696
865	2.97712979	1.11E-04	0.33589399	0	27	5	FALSE	oct-B2	31.14814815	27	0	0	0.67047837	TF_other	FALSE	0	oct-B2	73016	0.13641696
870	2.97712979	1.11E-04	0.33589399	0	27	5	FALSE	oct-B3	31.14814815	27	0	0	0.67047837	TF_other	FALSE	0	oct-B3	73016	0.13641696
875	2.97712979	1.11E-04	0.33589399	0	27	5	FALSE	POU2F2B	31.14814815	27	0	0	0.67047837	TF_other	FALSE	0	POU2F2B	73016	0.13641696
879	2.242996	0.0051715	0.44583227	0.08587571	60	4	FALSE	POU2F2	74.96666667	60	0	0	0.792834	TF_up	FALSE	0	POU2F2	731980	0.05903599
888	2.97712979	1.11E-04	0.33589399	0	27	5	FALSE	Oct-B1	31.14814815	27	0	0	0.67047837	TF_other	FALSE	0	Oct-B1	73016	0.13641696
894	2.5077187	2.50E-04	0.39876881	0	13	5	FALSE	AMICA1	176.7692308	13	0	0	0.74871355	up	FALSE	0	AMICA1	343420	0.1745474
908	2.30131504	0.00197732	0.43453416	0.08275862	30	4	FALSE	ANGPT2	139	30	0	0	0.78311416	up	FALSE	0	ANGPT2	850228	0.11558333
910	3.03030303	2.87E-06	0.33	0.33333333	3	5	FALSE	VHL	59.66666667	3	0	0	0.66161616	TF_other	FALSE	0	VHL	416	0.38034188
913	2.75528874	2.87E-04	0.36293837	0.06842105	20	5	FALSE	ETS2	50.2	20	0	0	0.70745188	TF_other	FALSE	0	ETS2	102688	0.10142857
922	2.93996569	8.72E-04	0.34014002	0	49	5	FALSE	TAL1	24.95918367	49	0	0	0.67667238	TF_other	FALSE	0	TAL1	942806	0.1010936
933	3.30074328	0	0.30296206	0	1	5	FALSE	LYL1	30	1	0	0	0.61654279	TF_other	FALSE	0	LYL1	0	0
943	2.4922813	1.16E-04	0.40123882	0.14545455	11	4	FALSE	ANKRD22	177.9090909	11	0	0	0.75128645	up	FALSE	0	ANKRD22	130824	0.18827726
955	2.30931961	0.00182659	0.43302798	0.0230608	54	4	FALSE	ANKS1B	104.0555556	54	0	0	0.78178006	down	FALSE	0	ANKS1B	1804402	0.08911838
956	2.77415666	4.25E-04	0.36046991	0.01587302	36	5	FALSE	PAX6	35.38888889	36	0	0	0.70430722	TF_other	FALSE	0	PAX6	303356	0.07790262
961	2.99942824	4.33E-04	0.33339687	0	28	5	FALSE	SOX9	24.14285714	28	0	0	0.66676196	TF_other	FALSE	0	SOX9	463674	0.11289199
964	2.99428245	1.74E-04	0.33396983	0	25	5	FALSE	FOXF2	25.72	25	0	0	0.66761959	TF_other	FALSE	0	FOXF2	183384	0.11605634
968	2.85134362	3.87E-04	0.35071185	0.01230769	26	5	FALSE	Pbx1a	31.69230769	26	0	0	0.69144273	TF_other	FALSE	0	Pbx1a	271978	0.0919185
983	2.87192682	0.00192801	0.34819829	0.0020202	45	5	FALSE	ATF6	25.95555556	45	0	0	0.6880122	TF_other	FALSE	0	ATF6	911346	0.08540008
998	2.82618639	0.00228672	0.3538337	0.00442656	71	4	FALSE	RFX1	25.54929577	71	0	0	0.6956356	TF_other	FALSE	0	RFX1	1572964	0.06947302
1004	2.92853059	0.00101069	0.34146818	0.00128205	40	5	FALSE	XBP-1	25.6	40	0	0	0.67857824	TF_other	FALSE	0	XBP-1	751570	0.09979757
1013	2.79588336	3.12E-04	0.35766871	0.01515152	33	5	FALSE	Pax-6	34.42424242	33	0	0	0.70068611	TF_other	FALSE	0	Pax-6	261104	0.08132045
1018	2.60148656	1.26E-04	0.3843956	0	10	5	FALSE	ANLN	192.9	10	0	0	0.73308557	up	FALSE	0	ANLN	240912	0.20858696
1029	3.34705546	1.22E-05	0.29877007	0	5	5	FALSE	ANO5	68.2	5	0	0	0.60882409	down	FALSE	0	ANO5	9532	0.24797048
1030	2.70383076	0.00469839	0.36984563	0.00638407	89	4	FALSE	Elk-1	25.66292135	89	0	0	0.71602821	TF_other	FALSE	0	Elk-1	2838830	0.05384503
1036	2.45340194	0.00148103	0.4075973	0	15	5	FALSE	ANPEP	187.7333333	15	0	0	0.75776634	up	FALSE	0	ANPEP	857616	0.17566635
1039	2.88907947	7.18E-04	0.34613101	0.00487805	41	5	FALSE	NKX2-5	27.48780488	41	0	0	0.68515342	TF_other	FALSE	0	NKX2-5	703860	0.09059233
1042	2.87650086	0.00191892	0.3476446	0.00181488	58	5	FALSE	NRSF	27.75862069	58	0	0	0.68724986	TF_other	FALSE	0	NRSF	1698502	0.09479712
1048	3.45283019	0	0.28961749	0	1	6	FALSE	ZFHX3	15	1	0	0	0.59119497	TF_other	FALSE	0	ZFHX3	0	0
1053	2.81761006	1.41E-04	0.35491071	0.07692308	13	5	FALSE	FLI1	51.23076923	13	0	0	0.69706499	TF_other	FALSE	0	FLI1	29816	0.12523683
1056	2.47284162	1.21E-04	0.40439306	0	5	5	FALSE	AOAH	454.4	5	0	0	0.7545264	up	FALSE	0	AOAH	326936	0.43429119
1062	2.8759291	4.06E-05	0.34771372	0	9	5	FALSE	AOC2	130.3333333	9	0	0	0.68734515	down	FALSE	0	AOC2	65560	0.19361277
1072	2.72955975	3.54E-05	0.36635945	0	4	5	FALSE	APBB1IP	315.5	4	0	0	0.71174004	up	FALSE	0	APBB1IP	82524	0.39263421
1077	2.54716981	3.06E-04	0.39259259	0	14	5	FALSE	APLNR	163.6428571	14	0	0	0.74213836	up	FALSE	0	APLNR	309840	0.16715607
1078	2.97255575	2.88E-04	0.33641085	0	35	5	FALSE	TCF4	26.82857143	35	0	0	0.67124071	TF_other	FALSE	0	TCF4	293418	0.11428571
1081	3.06403659	6.69E-05	0.32636686	0	14	5	FALSE	EN1	25.92857143	14	0	0	0.6559939	TF_other	FALSE	0	EN1	61012	0.14838435
1089	2.96569468	3.40E-04	0.33718913	0	41	5	FALSE	Tal-1beta	25.97560976	41	0	0	0.67238422	TF_other	FALSE	0	Tal-1beta	454972	0.11051155
1095	2.79874214	1.09E-05	0.35730337	0	2	5	FALSE	APOBEC3A	471.5	2	0	0	0.70020964	up	FALSE	0	APOBEC3A	31806	0.63581081
1098	3.05546026	0	0.32728293	0	1	5	FALSE	APOBEC3H	508	1	0	0	0.65742329	up	FALSE	0	APOBEC3H	0	0
1100	2.64665523	1.80E-04	0.37783539	0.01470588	17	5	FALSE	APOBR	95.88235294	17	0	0	0.72555746	up	FALSE	0	APOBR	141530	0.12458561
1118	3.01257862	4.19E-06	0.33194154	0	2	5	FALSE	APOC1	286	2	0	0	0.66457023	up	FALSE	0	APOC1	4590	0.52583026
1121	3.18296169	0.00115329	0.3141728	0	3	5	FALSE	APOD	147.6666667	3	0	0	0.63617305	up	FALSE	0	APOD	776502	0.33794163
1124	4.18238994	0	0.23909774	0	1	6	FALSE	NOTCH3	3	1	0	0	0.46960168	TF_other	FALSE	0	NOTCH3	0	0
1126	2.68381933	0.00171469	0.37260332	0	23	5	FALSE	APOE	91.17391304	23	0	0	0.71936345	up	FALSE	0	APOE	1204738	0.1081222
1130	3.47913093	1.09E-06	0.2874281	0	2	6	FALSE	NR2C2	28	2	0	0	0.58681151	TF_other	FALSE	0	NR2C2	1518	0.54
1132	3.32418525	1.03E-06	0.30082559	0	2	6	FALSE	FOXM1	30.5	2	0	0	0.61263579	TF_other	FALSE	0	FOXM1	1788	0.5462963
1140	2.92052601	1.26E-04	0.34240407	0.01282051	13	5	FALSE	ATF4	39.92307692	13	0	0	0.67991233	TF_other	FALSE	0	ATF4	50204	0.13711201
1153	2.96683819	1.30E-05	0.33705916	0	3	5	FALSE	APOL1	218.3333333	3	0	0	0.67219363	up	FALSE	0	APOL1	13948	0.37342497
1157	2.37106918	7.76E-04	0.42175066	0.04453441	39	4	FALSE	AQP1	105	39	0	0	0.77148847	up	FALSE	0	AQP1	679850	0.09725002
1165	2.87935963	2.13E-04	0.34729944	0.01333333	25	4	FALSE	IL10	30.12	25	0	0	0.68677339	TF_other	FALSE	0	IL10	141228	0.09061728
1196	2.86620926	2.67E-04	0.34889288	0.01538462	26	4	FALSE	TGIF1	31.15384615	26	0	0	0.68896512	TF_other	FALSE	0	TGIF1	157222	0.08792797
1199	2.54488279	9.59E-05	0.39294541	0.03571429	8	5	FALSE	AQP9	204.5	8	0	0	0.74251953	up	FALSE	0	AQP9	124486	0.23127128
1203	2.19611206	0.00534399	0.45535017	0.11111111	63	4	FALSE	NFIL3	77.33333333	63	0	0	0.80064799	TF_up	FALSE	0	NFIL3	1069790	0.05730288
1205	2.92738708	0.00217017	0.34160156	0.0025641	40	5	FALSE	HNF1A	20.325	40	0	0	0.67876882	TF_other	FALSE	0	HNF1A	879276	0.07647638
1210	2.5460263	1.12E-04	0.39276892	0.08974359	13	4	FALSE	ARAP2	147.1538462	13	0	0	0.74232895	up	FALSE	0	ARAP2	162012	0.16528067
1224	2.36020583	7.26E-04	0.42369186	0.04307692	26	4	FALSE	AREG	129.6538462	26	0	0	0.77329903	up	FALSE	0	AREG	557644	0.11459969
1228	3.04059463	3.26E-05	0.32888304	0	9	5	FALSE	SMAD4	33.55555556	9	0	0	0.6599009	TF_other	FALSE	0	SMAD4	13658	0.1961178
1232	2.90165809	3.17E-05	0.34463054	0.07142857	8	5	FALSE	WT1	50.125	8	0	0	0.68305698	TF_other	FALSE	0	WT1	5490	0.16390728
1252	2.80160091	1.00E-04	0.35693878	0.06666667	10	4	FALSE	BRCA1	59.5	10	0	0	0.69973318	TF_other	FALSE	0	BRCA1	35480	0.14090909
1254	2.485992	1.77E-04	0.40225391	0.07575758	12	5	FALSE	ARHGAP11A	178.0833333	12	0	0	0.75233467	up	FALSE	0	ARHGAP11A	260348	0.18440637
1255	2.80617496	6.00E-04	0.35635697	0.01479915	44	5	FALSE	XBP1P1	31.22727273	44	0	0	0.69897084	TF_other	FALSE	0	XBP1P1	131218	0.07688344
1263	2.14636935	0.01012637	0.46590304	0.0969031	78	4	FALSE	XBP1	75.8974359	78	0	0	0.80893844	TF_up	FALSE	0	XBP1	1485720	0.05340226
1269	2.26586621	0.00107072	0.44133232	0.04516129	31	4	FALSE	ARHGAP25	147.9354839	31	0	0	0.7890223	up	FALSE	0	ARHGAP25	1264758	0.11734641
1281	2.87707261	4.35E-04	0.34757552	0.00430108	31	5	FALSE	FOXO3	30.87096774	31	0	0	0.68715456	TF_other	FALSE	0	FOXO3	358526	0.08866196
1287	2.84391081	3.69E-04	0.35162847	0.01426025	34	4	FALSE	LUN-1	32.17647059	34	0	0	0.69268153	TF_other	FALSE	0	LUN-1	324600	0.08645766
1299	2.9782733	1.21E-04	0.33576502	0	20	5	FALSE	FOXO3B	30.25	20	0	0	0.67028778	TF_other	FALSE	0	FOXO3B	132992	0.12662338
1304	2.44654088	3.43E-04	0.40874036	0.03508772	19	5	FALSE	ARHGAP30	133.2631579	19	0	0	0.75890985	up	FALSE	0	ARHGAP30	392376	0.13210317
1315	2.98113208	6.42E-04	0.33544304	0	32	5	FALSE	COUP-TF1	21.5625	32	0	0	0.66981132	TF_other	FALSE	0	COUP-TF1	659484	0.09519676
1325	2.55974843	3.08E-04	0.39066339	0	19	5	FALSE	ARHGAP9	139.2631579	19	0	0	0.74004193	up	FALSE	0	ARHGAP9	444960	0.14492993
1345	2.57118353	1.89E-04	0.38892595	0	8	5	FALSE	ARHGDIB	224.5	8	0	0	0.73813608	up	FALSE	0	ARHGDIB	199930	0.23575949
1347	3.00343053	0.00133846	0.3329526	0	20	5	FALSE	FOXD3	25.05	20	0	0	0.66609491	TF_other	FALSE	0	FOXD3	336022	0.115625
1355	2.80445969	4.04E-06	0.35657492	0.14285714	7	4	FALSE	ARHGEF15	120.7142857	7	0	0	0.69925672	up	FALSE	0	ARHGEF15	2552	0.28707808
1363	3.20240137	1.64E-05	0.31226567	0	6	5	FALSE	ARHGEF26-AS1	98.66666667	6	0	0	0.6329331	down	FALSE	0	ARHGEF26-AS1	16352	0.26184093
1368	2.83190395	3.51E-04	0.35311932	0.00900901	37	5	FALSE	NF-kappaB2	26.97297297	37	0	0	0.69468268	TF_other	FALSE	0	NF-kappaB2	363386	0.07348922
1371	2.2915952	0.00104068	0.43637725	0.03556188	38	4	FALSE	ARRB2	149.0526316	38	0	0	0.78473413	up	FALSE	0	ARRB2	1724160	0.12180759
1396	2.8759291	0.00147757	0.34771372	7.26E-04	53	5	FALSE	SRY	25.49056604	53	0	0	0.68734515	TF_other	FALSE	0	SRY	1317876	0.08667244
1411	2.60663236	7.12E-05	0.38363676	0	6	5	FALSE	ASIP	303.1666667	6	0	0	0.73222794	down	FALSE	0	ASIP	164470	0.32596188
1418	2.70668954	0.00120881	0.36945501	0	5	5	FALSE	ASPM	268	5	0	0	0.71555174	up	FALSE	0	ASPM	768346	0.32324455
1421	3.70611778	0	0.26982413	0	1	6	FALSE	FOXJ1	5	1	0	0	0.54898037	TF_other	FALSE	0	FOXJ1	0	0
1425	2.18582047	0.00653311	0.45749411	0.06393443	61	4	FALSE	ATF3	106.9836066	61	0	0	0.80236326	TF_up	FALSE	0	ATF3	2451472	0.07877086
1433	3.16866781	5.30E-07	0.31559004	0	2	5	FALSE	MEF2D	42	2	0	0	0.63855536	TF_other	FALSE	0	MEF2D	408	0.57746479
1446	3.03430532	2.81E-05	0.32956473	0.04761905	7	5	FALSE	KLF4	40.28571429	7	0	0	0.66094911	TF_other	FALSE	0	KLF4	21964	0.22612245
1461	3.18524871	0	0.31394723	0	1	5	FALSE	JDP2	61	1	0	0	0.63579188	TF_other	FALSE	0	JDP2	0	0
1464	3.10520297	7.22E-06	0.32204014	0	4	5	FALSE	KLF6	40.25	4	0	0	0.64913284	TF_other	FALSE	0	KLF6	2154	0.33547009
1468	2.91252144	6.83E-04	0.34334511	0	41	5	FALSE	MIF-1	26.70731707	41	0	0	0.68124643	TF_other	FALSE	0	MIF-1	527994	0.09774645
1470	2.84676958	8.58E-05	0.35127536	0.16666667	12	5	FALSE	ATF2	55.33333333	12	0	0	0.69220507	TF_other	FALSE	0	ATF2	22188	0.1457231
1487	2.37392796	0.00389287	0.42124277	0.08571429	36	4	FALSE	HLF	68.33333333	36	0	0	0.77101201	TF_down	FALSE	0	HLF	317170	0.06291679
1491	2.84391081	4.63E-05	0.35162847	0	9	5	FALSE	ATP1A2	138.5555556	9	0	0	0.69268153	down	FALSE	0	ATP1A2	82502	0.2005183
1501	2.42138365	0.00140182	0.41298701	0.05847953	19	5	FALSE	ATP1B1	149.2105263	19	0	0	0.76310273	down	FALSE	0	ATP1B1	552680	0.14214552
1508	3.42081189	0	0.29232826	0	1	6	FALSE	NR3C2	19	1	0	0	0.59653135	TF_other	FALSE	0	NR3C2	0	0
1522	2.6163522	1.37E-04	0.38221154	0	11	5	FALSE	ATP1B2	162.8181818	11	0	0	0.73060797	down	FALSE	0	ATP1B2	186814	0.17782218
1534	2.41337907	2.66E-04	0.41435679	0.03921569	18	5	FALSE	ATP2A3	185.1111111	18	0	0	0.76443682	up	FALSE	0	ATP2A3	543352	0.17521368
1541	2.71526587	0.00153924	0.36828806	0.01298077	65	5	FALSE	FOXA1	26.13846154	65	0	0	0.71412236	TF_other	FALSE	0	FOXA1	1233440	0.05095385
1554	2.57004002	1.78E-04	0.389099	0	10	5	FALSE	ATP6V0A4	184.1	10	0	0	0.73832666	up	FALSE	0	ATP6V0A4	246702	0.19213012
1565	2.89251001	6.70E-05	0.3457205	0.02564103	13	5	FALSE	ATP6V0D2	76.76923077	13	0	0	0.68458167	up	FALSE	0	ATP6V0D2	51348	0.17272727
1579	2.73813608	2.03E-05	0.36521194	0	3	5	FALSE	B4GALT6	379	3	0	0	0.71031065	down	FALSE	0	B4GALT6	56660	0.4725
1583	2.80274443	1.78E-04	0.35679315	0	11	5	FALSE	BANK1	104	11	0	0	0.6995426	up	FALSE	0	BANK1	102308	0.14385475
1595	2.52887364	2.22E-04	0.39543296	0.05263158	19	5	FALSE	BARX1	122.4736842	19	0	0	0.74518773	down	FALSE	0	BARX1	272752	0.13062099
1615	2.45225843	3.20E-04	0.40778736	0.03267974	18	5	FALSE	BATF	161.7222222	18	0	0	0.75795693	up	FALSE	0	BATF	443542	0.15441568
1624	2.85591767	9.76E-04	0.35015015	0	50	5	FALSE	REL	22.74	50	0	0	0.69068039	TF_other	FALSE	0	REL	774208	0.06901587
1635	2.48942253	5.09E-04	0.40169959	0	20	5	FALSE	BAZ1A	150.75	20	0	0	0.75176291	up	FALSE	0	BAZ1A	534292	0.14581305
1656	2.32246998	5.96E-04	0.43057607	0.07352941	17	5	FALSE	BCAT1	206.0588235	17	0	0	0.77958834	up	FALSE	0	BCAT1	788638	0.1733955
1674	2.75300172	0.00128857	0.36323988	0	11	5	FALSE	BCL2A1	128.6363636	11	0	0	0.70783305	up	FALSE	0	BCL2A1	1248518	0.16342684
1680	2.80388794	2.16E-04	0.35664763	0.08974359	13	5	FALSE	HDAC1	52.84615385	13	0	0	0.69935201	TF_other	FALSE	0	HDAC1	74196	0.12402255
1682	3.75242996	0	0.26649398	0	1	6	FALSE	HMGA2	11	1	0	0	0.54126167	TF_other	FALSE	0	HMGA2	0	0
1688	2.33905089	0.00115971	0.42752383	0.0172043	31	4	FALSE	BCL3	141.9032258	31	0	0	0.77682485	TF_up	FALSE	0	BCL3	1183184	0.12385399
1719	2.19839909	0.00698417	0.45487646	0.02600733	105	4	FALSE	BDNF	86.38095238	105	0	0	0.80026682	up	FALSE	0	BDNF	5049826	0.06779992
1724	3	3.18E-04	0.33333333	0	27	5	FALSE	NKX6-1	23.40740741	27	0	0	0.66666667	TF_other	FALSE	0	NKX6-1	303186	0.11038132
1732	3.14179531	1.14E-06	0.31828935	0	3	5	FALSE	REST	51.66666667	3	0	0	0.64303411	TF_other	FALSE	0	REST	2020	0.41192412
1738	2.99656947	1.66E-04	0.33371494	0	23	5	FALSE	RORalpha1	26.65217391	23	0	0	0.66723842	TF_other	FALSE	0	RORalpha1	180544	0.12332776
1743	2.92338479	2.23E-04	0.34206924	0	17	4	FALSE	Cart-1	37.41176471	17	0	0	0.67943587	TF_other	FALSE	0	Cart-1	116168	0.13288965
1829	2.56889651	1.01E-04	0.3892722	0	9	5	FALSE	BEND6	220.6666667	9	0	0	0.73851725	down	FALSE	0	BEND6	221924	0.22810661
1839	2.55746141	2.67E-04	0.39101274	0.3	5	5	FALSE	BID	286.8	5	0	0	0.7404231	up	FALSE	0	BID	108286	0.3234763
1841	3.23156089	3.52E-06	0.30944798	0	3	5	FALSE	ZBTB16	21	3	0	0	0.62807318	TF_other	FALSE	0	ZBTB16	676	0.39215686
1846	2.63407662	2.94E-04	0.37963968	0	20	5	FALSE	BIK	122.25	20	0	0	0.7276539	up	FALSE	0	BIK	338938	0.13809795
1862	3.00743282	2.96E-04	0.33250951	0.00307692	26	5	FALSE	FOXL1	25.19230769	26	0	0	0.66542786	TF_other	FALSE	0	FOXL1	296652	0.1144775
1868	2.44711264	6.72E-05	0.40864486	0.28571429	8	4	FALSE	BIN2	263	8	0	0	0.75881456	up	FALSE	0	BIN2	135104	0.258867
1877	2.3670669	0.00147128	0.42246377	0.03333333	21	5	FALSE	BIRC3	148.3333333	21	0	0	0.77215552	up	FALSE	0	BIRC3	761300	0.13165266
1897	3.00857633	6.48E-05	0.33238312	0	9	5	FALSE	RELB	28.66666667	9	0	0	0.66523728	TF_other	FALSE	0	RELB	23868	0.15118397
1899	3.33161807	8.00E-07	0.30015445	0	2	5	FALSE	DEK	16	2	0	0	0.61139699	TF_other	FALSE	0	DEK	164	0.53571429
1901	2.61806747	0.00357537	0.38196113	0	27	5	FALSE	BIRC5	73.33333333	27	0	0	0.73032209	up	FALSE	0	BIRC5	2217400	0.08109118
1902	3.61749571	0	0.27643433	0	1	6	FALSE	SP4	27	1	0	0	0.56375071	TF_other	FALSE	0	SP4	0	0
1906	2.97427101	2.30E-05	0.33621684	0.1	5	5	FALSE	TRP53	58	5	0	0	0.67095483	TF_other	FALSE	0	TRP53	12884	0.24016736
1909	3.10405946	1.82E-05	0.32215878	0	4	5	FALSE	APC	44.5	4	0	0	0.64932342	TF_other	FALSE	0	APC	9026	0.31521739
1921	2.92109777	4.28E-05	0.34233705	0.06666667	6	5	FALSE	KLF5	60.83333333	6	0	0	0.67981704	TF_other	FALSE	0	KLF5	15704	0.21720818
1924	3.20068611	1.38E-05	0.31243301	0	5	5	FALSE	DNMT1	23.2	5	0	0	0.63321898	TF_other	FALSE	0	DNMT1	11304	0.26428571
1928	3.08233276	3.69E-05	0.3244296	0	4	5	FALSE	ILF3	39.25	4	0	0	0.65294454	TF_other	FALSE	0	ILF3	10954	0.27919708
1931	2.93825043	5.58E-05	0.34033859	0.03636364	11	5	FALSE	RB1	33.63636364	11	0	0	0.67695826	TF_other	FALSE	0	RB1	45136	0.13163636
1933	3.05831904	7.43E-05	0.32697701	0	9	5	FALSE	TCF7L2	30.11111111	9	0	0	0.65694683	TF_other	FALSE	0	TCF7L2	30672	0.18781362
1935	3.61749571	0	0.27643433	0	1	6	FALSE	EHMT2	27	1	0	0	0.56375071	TF_other	FALSE	0	EHMT2	0	0
1938	2.57690109	4.14E-04	0.38806301	0	24	5	FALSE	BMP5	82.125	24	0	0	0.73718315	down	FALSE	0	BMP5	243948	0.09634798
1963	2.36592338	7.47E-04	0.42266796	0.01139601	27	5	FALSE	BRE	135.9259259	27	0	0	0.7723461	up	FALSE	0	BRE	866500	0.1215028
1970	2.29502573	0.00324727	0.43572496	0.0634278	39	4	FALSE	NR4A1	91.87179487	39	0	0	0.78416238	TF_up	FALSE	0	NR4A1	719582	0.07660095
1992	2.36420812	0.00329226	0.42297461	0	38	5	FALSE	BTG2	131.6578947	38	0	0	0.77263198	up	FALSE	0	BTG2	2315002	0.11583147
2012	3.36363636	0	0.2972973	0	1	6	FALSE	PHB2	38	1	0	0	0.60606061	TF_other	FALSE	0	PHB2	0	0
2032	2.4105203	3.38E-04	0.4148482	0.07894737	20	5	FALSE	BTK	124.75	20	0	0	0.76491328	up	FALSE	0	BTK	259092	0.11726415
2046	2.78216123	3.81E-04	0.3594328	0.04761905	22	5	FALSE	ETV4	44.86363636	22	0	0	0.70297313	TF_other	FALSE	0	ETV4	82452	0.09707579
2054	2.69982847	6.64E-05	0.3703939	0	4	5	FALSE	BTLA	337.25	4	0	0	0.71669525	up	FALSE	0	BTLA	94036	0.40221292
2059	3.0383076	0	0.3291306	0	1	5	FALSE	BTN1A1	518	1	0	0	0.66028207	up	FALSE	0	BTN1A1	0	0
2061	2.78730703	7.44E-04	0.35876923	0	8	5	FALSE	BUB1B	138.125	8	0	0	0.70211549	up	FALSE	0	BUB1B	433592	0.1855548
2062	3.56889651	1.07E-06	0.28019865	0	2	6	FALSE	ZNF143	5.5	2	0	0	0.57185058	TF_other	FALSE	0	ZNF143	984	0.5
2071	2.8376215	1.26E-05	0.35240782	0	4	5	FALSE	C10orf10	125.75	4	0	0	0.69372975	up	FALSE	0	C10orf10	10544	0.29561611
2076	2.50543168	1.70E-04	0.39913282	0	8	5	FALSE	C10orf107	311.125	8	0	0	0.74909472	down	FALSE	0	C10orf107	351322	0.30735877
2085	2.94854202	7.49E-06	0.33915067	0	3	5	FALSE	C10orf128	298.6666667	3	0	0	0.675243	up	FALSE	0	C10orf128	10956	0.5036661
2089	3.16809605	5.14E-06	0.315647	0	2	5	FALSE	C10orf136	221.5	2	0	0	0.63865066	up	FALSE	0	C10orf136	2232	0.51160093
2092	3.62492853	3.87E-06	0.27586751	0	4	5	FALSE	C10orf53	57.75	4	0	0	0.56251191	down	FALSE	0	C10orf53	1326	0.50221239
2097	2.62607204	4.19E-05	0.38079686	0	4	5	FALSE	C10orf54	377	4	0	0	0.72898799	up	FALSE	0	C10orf54	102484	0.41777778
2102	2.59405374	6.60E-05	0.38549702	0	6	5	FALSE	C10orf55	329.5	6	0	0	0.73432438	up	FALSE	0	C10orf55	189458	0.35058698
2109	2.53401944	3.41E-04	0.39462996	0	22	5	FALSE	C12orf42	141.8636364	22	0	0	0.74433009	down	FALSE	0	C12orf42	538776	0.14403235
2132	3.01943968	5.07E-05	0.33118728	0	6	5	FALSE	C13orf33	117	6	0	0	0.66342672	up	FALSE	0	C13orf33	31754	0.21129326
2139	3.01543739	3.70E-05	0.33162685	0	9	5	FALSE	C14orf178	64.33333333	9	0	0	0.66409377	down	FALSE	0	C14orf178	21454	0.19668737
2149	2.72955975	2.68E-05	0.36635945	0	5	5	FALSE	C14orf37	307.4	5	0	0	0.71174004	down	FALSE	0	C14orf37	84776	0.38252185
2155	3.21955403	0	0.31060202	0	1	5	FALSE	C14orf39	425	1	0	0	0.63007433	down	FALSE	0	C14orf39	0	0
2157	2.70440252	3.69E-05	0.36976744	0	5	5	FALSE	C15orf48	253	5	0	0	0.71593291	up	FALSE	0	C15orf48	76516	0.30361446
2163	3.18696398	0	0.31377826	0	1	5	FALSE	C18orf34	414	1	0	0	0.635506	down	FALSE	0	C18orf34	0	0
2165	2.97141224	2.54E-05	0.33654031	0	5	5	FALSE	C19orf59	169.6	5	0	0	0.67143129	up	FALSE	0	C19orf59	36020	0.2847973
2171	3.053745	5.74E-06	0.32746677	0.33333333	3	5	FALSE	C19orf77	88.66666667	3	0	0	0.65770917	up	FALSE	0	C19orf77	1530	0.45299145
2175	2.87878788	4.98E-05	0.34736842	0	6	5	FALSE	C1orf112	174.8333333	6	0	0	0.68686869	up	FALSE	0	C1orf112	74758	0.26378351
2182	2.8324757	4.42E-05	0.35304804	0	4	5	FALSE	C1orf162	251	4	0	0	0.69458738	up	FALSE	0	C1orf162	48696	0.35561878
2187	2.76329331	1.66E-05	0.36188703	0	3	5	FALSE	C1orf186	421.6666667	3	0	0	0.70611778	up	FALSE	0	C1orf186	52898	0.54420009
2191	2.56203545	9.74E-05	0.39031466	0	9	5	FALSE	C1orf38	267.3333333	9	0	0	0.73966076	up	FALSE	0	C1orf38	257554	0.27570738
2201	2.37678674	8.19E-04	0.42073611	0.02024291	39	4	FALSE	C1orf51	100.8974359	39	0	0	0.77053554	down	FALSE	0	C1orf51	867908	0.09509561
2241	3.00228702	5.20E-06	0.33307941	0	2	5	FALSE	C1orf53	295.5	2	0	0	0.6662855	down	FALSE	0	C1orf53	4866	0.53642987
2244	2.34190966	0.00136737	0.42700195	0.00676329	46	4	FALSE	C2	98.89130435	46	0	0	0.77634839	up	FALSE	0	C2	1398306	0.08826752
2276	2.95940537	3.51E-04	0.33790572	0	32	5	FALSE	MEF2A	24.8125	32	0	0	0.67343244	TF_other	FALSE	0	MEF2A	214152	0.11075581
2280	2.91137793	2.08E-04	0.34347997	0.01058201	28	4	FALSE	HAND1	29.82142857	28	0	0	0.68143701	TF_other	FALSE	0	HAND1	219474	0.09666667
2293	3.10920526	1.13E-05	0.3216256	0	3	5	FALSE	C21orf37	200.6666667	3	0	0	0.64846579	down	FALSE	0	C21orf37	15486	0.39073712
2297	2.68839337	3.43E-05	0.37196937	0	6	5	FALSE	C2CD4B	260	6	0	0	0.71860111	up	FALSE	0	C2CD4B	106546	0.30870083
2304	2.54488279	1.64E-04	0.39294541	0.1	16	5	FALSE	C3	112.1875	16	0	0	0.74251953	up	FALSE	0	C3	96576	0.12837256
2320	2.79473985	3.46E-04	0.35781506	0.03684211	20	5	FALSE	ESR2	35.75	20	0	0	0.70087669	TF_other	FALSE	0	ESR2	141684	0.08361045
2322	2.58890795	5.18E-05	0.38626325	0.13333333	6	5	FALSE	C3AR1	246.3333333	6	0	0	0.73518201	up	FALSE	0	C3AR1	99270	0.29161724
2329	3.26243568	1.42E-05	0.30651945	0	5	5	FALSE	C3orf36	90.4	5	0	0	0.62292739	up	FALSE	0	C3orf36	14630	0.25689655
2335	2.75242996	6.93E-05	0.36331533	0	7	5	FALSE	C3orf52	167.1428571	7	0	0	0.70792834	up	FALSE	0	C3orf52	85074	0.21191691
2343	2.45454545	0.00186631	0.40740741	0	38	5	FALSE	C4A	117.631579	38	0	0	0.75757576	up	FALSE	0	C4A	1465674	0.11171607
2382	2.46083476	7.76E-04	0.40636617	0	34	5	FALSE	C4B	120.5882353	34	0	0	0.75652754	up	FALSE	0	C4B	1104432	0.11476798
2417	3.0383076	0	0.3291306	0	1	5	FALSE	C5AR1	518	1	0	0	0.66028207	up	FALSE	0	C5AR1	0	0
2419	2.96226415	8.23E-05	0.33757962	0	8	5	FALSE	C5orf63	106.25	8	0	0	0.67295597	down	FALSE	0	C5orf63	51436	0.17718855
2428	3.23956547	0	0.30868337	0	1	5	FALSE	C6orf183	407	1	0	0	0.62673909	down	FALSE	0	C6orf183	0	0
2430	3.52715838	2.29E-06	0.28351435	0	3	5	FALSE	C9orf9	64	3	0	0	0.57880694	down	FALSE	0	C9orf9	1702	0.36416185
2434	2.39165237	0.0012856	0.41812097	0	44	5	FALSE	CACNB4	116.4772727	44	0	0	0.76805794	down	FALSE	0	CACNB4	1586330	0.10574842
2479	2.57347055	3.84E-04	0.38858032	0	27	5	FALSE	CADM3	131.5185185	27	0	0	0.73775491	up	FALSE	0	CADM3	681792	0.13767776
2507	2.63121784	2.75E-04	0.38005215	0	15	5	FALSE	CALB1	139.8	15	0	0	0.72813036	down	FALSE	0	CALB1	259604	0.15543113
2523	2.47741567	0.001328	0.40364643	0.12631579	20	4	FALSE	CALCA	117.5	20	0	0	0.75376406	up	FALSE	0	CALCA	224420	0.12648328
2531	2.80102916	1.59E-04	0.35701164	0.11428571	15	5	FALSE	ATF1	50.4	15	0	0	0.69982847	TF_other	FALSE	0	ATF1	35898	0.11589506
2540	3.47684391	0	0.28761717	0	1	5	FALSE	BARX2	20	1	0	0	0.58719268	TF_other	FALSE	0	BARX2	0	0
2546	2.56946827	1.48E-04	0.38918558	0.04444444	10	5	FALSE	CALCRL	153.3	10	0	0	0.73842196	up	FALSE	0	CALCRL	157990	0.18059172
2557	3.28244711	9.03E-05	0.30465076	0	8	5	FALSE	CALML6	45.25	8	0	0	0.61959215	down	FALSE	0	CALML6	24546	0.14848993
2562	3.2481418	4.03E-05	0.30786833	0	8	6	FALSE	BRG1	14.25	8	0	0	0.6253097	TF_other	FALSE	0	BRG1	39782	0.21370968
2564	3.06575186	1.04E-04	0.32618426	0	8	5	FALSE	CTCF	26	8	0	0	0.65570802	TF_other	FALSE	0	CTCF	44070	0.17361111
2567	3.09090909	6.27E-05	0.32352941	0	10	5	FALSE	HNF4A	18.8	10	0	0	0.65151515	TF_other	FALSE	0	HNF4A	32718	0.15344828
2569	2.33390509	1.30E-04	0.42846644	0.25757576	12	4	FALSE	CAPG	236.75	12	0	0	0.77768249	up	FALSE	0	CAPG	280768	0.20100538
2582	3.21955403	0	0.31060202	0	1	5	FALSE	CARD16	425	1	0	0	0.63007433	up	FALSE	0	CARD16	0	0
2584	2.54488279	1.20E-04	0.39294541	0.03636364	11	5	FALSE	CASC5	185.9090909	11	0	0	0.74251953	up	FALSE	0	CASC5	215590	0.19742198
2596	2.68839337	6.87E-05	0.37196937	0	5	5	FALSE	CASP10	247.4	5	0	0	0.71860111	up	FALSE	0	CASP10	96282	0.29159763
2602	3.61749571	0	0.27643433	0	1	5	FALSE	CASP5	132	1	0	0	0.56375071	up	FALSE	0	CASP5	0	0
2604	2.5025729	0.00188933	0.39958876	0	13	5	FALSE	CASP8	180.8461539	13	0	0	0.74957118	up	FALSE	0	CASP8	942192	0.17666616
2607	3.50200114	0	0.28555102	0	1	6	FALSE	MEN1	13	1	0	0	0.58299981	TF_other	FALSE	0	MEN1	0	0
2612	3.21269297	2.50E-06	0.31126535	0	2	5	FALSE	RUNX3	37	2	0	0	0.63121784	TF_other	FALSE	0	RUNX3	968	0.52941176
2620	2.61463694	1.41E-04	0.38246228	0	11	5	FALSE	CASQ2	164	11	0	0	0.73089384	up	FALSE	0	CASQ2	206334	0.17853231
2632	3.25557461	1.33E-05	0.30716544	0	5	5	FALSE	CBLN2	92.4	5	0	0	0.6240709	down	FALSE	0	CBLN2	11452	0.24972678
2638	2.49514008	5.17E-04	0.4007791	0.0094697	33	5	FALSE	CBX7	90.72727273	33	0	0	0.75080999	up	FALSE	0	CBX7	470964	0.1002331
2672	2.82961692	6.52E-05	0.35340473	0	7	5	FALSE	CCDC109B	163.4285714	7	0	0	0.69506385	up	FALSE	0	CCDC109B	62504	0.22909531
2680	2.74728416	1.56E-05	0.36399584	0	3	5	FALSE	CCDC114	365.6666667	3	0	0	0.70878597	down	FALSE	0	CCDC114	38360	0.46513605
2684	2.89937107	1.06E-05	0.34490239	0	2	5	FALSE	CCDC144NL	360.5	2	0	0	0.68343816	down	FALSE	0	CCDC144NL	23078	0.56347962
2687	2.51457976	1.36E-04	0.39768076	0	6	5	FALSE	CCDC146	338.3333333	6	0	0	0.74757004	up	FALSE	0	CCDC146	301460	0.33498841
2694	2.89708405	2.47E-05	0.34517466	0	5	5	FALSE	CCDC162P	208	5	0	0	0.68381933	down	FALSE	0	CCDC162P	36138	0.32496075
2700	3.21955403	0	0.31060202	0	1	5	FALSE	CCDC42	425	1	0	0	0.63007433	down	FALSE	0	CCDC42	0	0
2702	2.6649514	4.27E-05	0.37524136	0	4	5	FALSE	CCDC69	330	4	0	0	0.7225081	up	FALSE	0	CCDC69	90714	0.38078704
2707	2.66723842	1.25E-04	0.37491961	0	7	5	FALSE	CCL17	202	7	0	0	0.72212693	up	FALSE	0	CCL17	109348	0.23344948
2712	3.06975415	4.78E-05	0.32575899	0	10	5	FALSE	TCFAP2A	23.6	10	0	0	0.65504098	TF_other	FALSE	0	TCFAP2A	24554	0.1537415
2716	2.6112064	1.55E-04	0.38296475	0	8	5	FALSE	CCL18	198.625	8	0	0	0.7314656	up	FALSE	0	CCL18	177572	0.21764868
2721	3.05946255	5.10E-05	0.32685479	0	18	5	FALSE	GR-beta	21.72222222	18	0	0	0.65675624	TF_other	FALSE	0	GR-beta	80042	0.13723326
2726	2.3950829	0.00732098	0.41752208	0.02682927	41	4	FALSE	CCL2	71.51219512	41	0	0	0.76748618	up	FALSE	0	CCL2	1025214	0.06931212
2730	3.07204117	0.00117524	0.32551647	0	10	5	FALSE	NR1I2	21	10	0	0	0.65465981	TF_other	FALSE	0	NR1I2	184172	0.15384615
2740	3.39451115	0	0.29459323	0	1	5	FALSE	APEX1	41	1	0	0	0.60091481	TF_other	FALSE	0	APEX1	0	0
2753	3.13893654	5.08E-05	0.31857923	0	7	5	FALSE	HOXC8	20.42857143	7	0	0	0.64351058	TF_other	FALSE	0	HOXC8	15396	0.17042607
2756	3.15323042	5.08E-06	0.31713509	0	3	5	FALSE	NFAT5	38.33333333	3	0	0	0.64112826	TF_other	FALSE	0	NFAT5	1158	0.41481481
2760	3.27215552	3.80E-06	0.30560895	0	3	5	FALSE	IRF3	30	3	0	0	0.62130741	TF_other	FALSE	0	IRF3	792	0.40277778
2764	3.02915952	3.46E-06	0.33012458	0	2	5	FALSE	MAML1	100.5	2	0	0	0.66180675	TF_other	FALSE	0	MAML1	554	0.52645503
2768	3.39451115	0	0.29459323	0	1	5	FALSE	GAS	41	1	0	0	0.60091481	TF_other	FALSE	0	GAS	0	0
2771	3.30646083	7.48E-06	0.30243818	0	2	5	FALSE	PREB	25	2	0	0	0.61558986	TF_other	FALSE	0	PREB	732	0.5106383
2774	3.36821041	6.90E-07	0.29689357	0	2	5	FALSE	AP1	31	2	0	0	0.60529827	TF_other	FALSE	0	AP1	140	0.66666667
2777	2.49170955	1.33E-04	0.40133089	0.09090909	11	5	FALSE	CCL20	166.2727273	11	0	0	0.75138174	up	FALSE	0	CCL20	193602	0.17734565
2789	2.92281304	1.96E-04	0.34213615	0	10	5	FALSE	CCL21	103.5	10	0	0	0.67953116	up	FALSE	0	CCL21	70348	0.16167192
2792	3.06174957	1.72E-05	0.32661064	0	4	5	FALSE	NFKB2	35.5	4	0	0	0.65637507	TF_other	FALSE	0	NFKB2	7010	0.27380952
2801	2.59862779	6.28E-05	0.38481848	0.10606061	12	5	FALSE	CCL22	136.6666667	12	0	0	0.73356204	up	FALSE	0	CCL22	72246	0.17671855
2814	3.44825615	6.24E-06	0.29000166	0	3	5	FALSE	CCL23	66.66666667	3	0	0	0.59195731	up	FALSE	0	CCL23	2878	0.34929078
2818	2.4591195	1.37E-04	0.40664962	0.14102564	13	5	FALSE	CCL24	159.5384615	13	0	0	0.75681342	up	FALSE	0	CCL24	153522	0.15947279
2832	2.44482561	6.33E-04	0.40902713	0	22	5	FALSE	CCL3	133.2272727	22	0	0	0.75919573	up	FALSE	0	CCL3	646818	0.12392434
2850	2.864494	2.06E-04	0.3491018	0.02631579	20	4	FALSE	RUNX1	29.9	20	0	0	0.689251	TF_other	FALSE	0	RUNX1	76736	0.07970027
2856	2.56660949	1.35E-04	0.38961907	0.02222222	10	5	FALSE	CCL3L3	126.3	10	0	0	0.73889842	up	FALSE	0	CCL3L3	125150	0.14852071
2867	2.56317896	0.00141526	0.39014053	0	14	5	FALSE	CCL4	155.3571429	14	0	0	0.73947017	up	FALSE	0	CCL4	1224606	0.16062138
2868	2.95082905	2.68E-05	0.33888781	0	6	5	FALSE	CREM	48.5	6	0	0	0.67486183	TF_other	FALSE	0	CREM	15884	0.20652174
2876	3.5626072	0	0.28069331	0	1	6	FALSE	HUWE1	14	1	0	0	0.5728988	TF_other	FALSE	0	HUWE1	0	0
2884	2.69754145	1.19E-04	0.37070793	0	9	5	FALSE	CCL4L2	133.3333333	9	0	0	0.71707642	up	FALSE	0	CCL4L2	83406	0.17762864
2894	2.48542024	0.00283956	0.40234645	0.09538462	26	4	FALSE	CCL5	91.57692308	26	0	0	0.75242996	up	FALSE	0	CCL5	323362	0.10186298
2895	3.10920526	1.21E-05	0.3216256	0	5	5	FALSE	NFKBIA	36.2	5	0	0	0.64846579	TF_other	FALSE	0	NFKBIA	2888	0.29579832
2903	3.48484848	0	0.28695652	0	1	5	FALSE	KLF13	26	1	0	0	0.58585859	TF_other	FALSE	0	KLF13	0	0
2917	3.35220126	9.90E-07	0.29831144	0	2	5	FALSE	IRF7	17	2	0	0	0.60796646	TF_other	FALSE	0	IRF7	526	0.55172414
2924	3.17667238	6.88E-05	0.31479482	0	5	5	FALSE	CCL7	92.8	5	0	0	0.63722127	up	FALSE	0	CCL7	15390	0.24157895
2930	2.53459119	2.82E-04	0.39454094	0	15	5	FALSE	CCR1	151.5333333	15	0	0	0.7442348	up	FALSE	0	CCR1	397972	0.15236167
2946	2.52201258	2.05E-04	0.39650873	0.03636364	11	5	FALSE	CCR2	191.6363636	11	0	0	0.74633124	up	FALSE	0	CCR2	257028	0.19722014
2958	2.63979417	1.24E-04	0.37881741	0	9	5	FALSE	CCR3	200.2222222	9	0	0	0.72670097	up	FALSE	0	CCR3	190102	0.22742263
2968	2.61063465	6.81E-04	0.38304862	0	7	5	FALSE	CCR4	263.8571429	7	0	0	0.73156089	up	FALSE	0	CCR4	219198	0.2901293
2970	3.33333333	6.49E-06	0.3	0	3	5	FALSE	TBX21	15.33333333	3	0	0	0.61111111	TF_other	FALSE	0	TBX21	1870	0.35833333
2975	3.1995426	3.55E-06	0.31254467	0	3	5	FALSE	FOSL2	26	3	0	0	0.63340957	TF_other	FALSE	0	FOSL2	1084	0.40322581
2978	2.432247	0.00112427	0.41114245	0.24444444	10	5	FALSE	CCR7	232.2	10	0	0	0.76129217	up	FALSE	0	CCR7	367242	0.21854991
2979	2.3670669	0.0028624	0.42246377	0.13071895	18	4	FALSE	KLF2	151.1111111	18	0	0	0.77215552	TF_up	FALSE	0	KLF2	459838	0.13618131
2982	3.29445397	0.00116307	0.30354044	0	6	5	FALSE	TRERF1	6	6	0	0	0.617591	TF_other	FALSE	0	TRERF1	150682	0.23809524
2991	2.4373928	3.82E-04	0.41027445	0	16	5	FALSE	CCRL2	180.0625	16	0	0	0.76043453	up	FALSE	0	CCRL2	590874	0.16641496
3008	2.56375071	2.69E-04	0.39005352	0	14	5	FALSE	CD109	151.0714286	14	0	0	0.73937488	up	FALSE	0	CD109	305508	0.15863787
3023	2.44654088	0.00186106	0.40874036	0.01185771	23	5	FALSE	CD14	131.9130435	23	0	0	0.75890985	up	FALSE	0	CD14	667914	0.12604515
3035	3.27501429	1.35E-06	0.30534218	0	2	5	FALSE	SP100	31.5	2	0	0	0.62083095	TF_other	FALSE	0	SP100	492	0.54464286
3037	3.20411664	1.14E-05	0.3120985	0	4	5	FALSE	SP2	27.5	4	0	0	0.63264723	TF_other	FALSE	0	SP2	7962	0.30113636
3049	2.64036592	6.08E-05	0.37873538	0.0952381	7	5	FALSE	CD163	183	7	0	0	0.72660568	up	FALSE	0	CD163	77994	0.22605771
3057	3.23956547	0	0.30868337	0	1	5	FALSE	CD163L1	407	1	0	0	0.62673909	up	FALSE	0	CD163L1	0	0
3059	2.44825615	2.33E-04	0.40845399	0	10	5	FALSE	CD180	259.2	10	0	0	0.75862398	up	FALSE	0	CD180	476522	0.24266917
3070	2.81475129	3.80E-04	0.35527118	0	9	5	FALSE	CD1D	107.7777778	9	0	0	0.69754145	up	FALSE	0	CD1D	83724	0.15167298
3074	3.23842196	9.85E-06	0.30879237	0	5	5	FALSE	RARG	18.4	5	0	0	0.62692967	TF_other	FALSE	0	RARG	4030	0.271875
3081	2.45340194	0.00303799	0.4075973	0	17	5	FALSE	CD2	163.4705882	17	0	0	0.75776634	up	FALSE	0	CD2	1390190	0.15517726
3082	3.13722127	1.44E-05	0.31875342	0	7	5	FALSE	ELF1	19.28571429	7	0	0	0.64379646	TF_other	FALSE	0	ELF1	9092	0.21018062
3084	3.45283019	0	0.28961749	0	1	6	FALSE	SOX4	17	1	0	0	0.59119497	TF_other	FALSE	0	SOX4	0	0
3088	2.99142367	9.76E-06	0.33428899	0	3	5	FALSE	HBP1	74	3	0	0	0.66809605	TF_other	FALSE	0	HBP1	1918	0.37244898
3094	3.45283019	0	0.28961749	0	1	6	FALSE	TCFL5	17	1	0	0	0.59119497	TF_other	FALSE	0	TCFL5	0	0
3103	2.43110349	3.29E-04	0.41133584	0	15	5	FALSE	CD226	211.8666667	15	0	0	0.76148275	up	FALSE	0	CD226	611654	0.19560915
3119	2.51972556	3.72E-04	0.39686862	0	14	5	FALSE	CD247	178.2857143	14	0	0	0.74671241	up	FALSE	0	CD247	375536	0.17889578
3134	2.51457976	8.15E-05	0.39768076	0.15555556	10	4	FALSE	CD27	177.7	10	0	0	0.74757004	up	FALSE	0	CD27	93550	0.19656319
3145	2.85191538	3.89E-05	0.35064154	0	6	5	FALSE	CD274	185.6666667	6	0	0	0.69134744	up	FALSE	0	CD274	72382	0.26418693
3152	2.60320183	9.20E-05	0.38414232	0	6	5	FALSE	CD300A	310.8333333	6	0	0	0.7327997	up	FALSE	0	CD300A	181504	0.33972953
3159	2.90566038	6.48E-06	0.34415584	0	3	5	FALSE	CD300LF	331	3	0	0	0.68238994	up	FALSE	0	CD300LF	17548	0.52380952
3163	2.74499714	2.30E-05	0.3642991	0	4	5	FALSE	CD37	164.75	4	0	0	0.70916714	up	FALSE	0	CD37	10368	0.27155887
3168	2.53687822	1.61E-04	0.39418526	0	10	5	FALSE	CD38	213.8	10	0	0	0.74385363	up	FALSE	0	CD38	320328	0.21670061
3179	2.83933676	1.77E-04	0.35219493	0	7	5	FALSE	CD3D	133.7142857	7	0	0	0.69344387	up	FALSE	0	CD3D	47372	0.19123096
3182	3.10291595	8.21E-06	0.3222775	0	4	5	FALSE	ELF2	37.5	4	0	0	0.64951401	TF_other	FALSE	0	ELF2	3728	0.28740157
3188	2.63464837	0.00122248	0.37955729	0	6	5	FALSE	CD3E	252.5	6	0	0	0.7275586	up	FALSE	0	CD3E	656434	0.28514739
3192	3.63407662	0	0.27517306	0	1	6	FALSE	TCF7	6	1	0	0	0.56098723	TF_other	FALSE	0	TCF7	0	0
3196	2.95368782	1.13E-04	0.33855981	0	4	5	FALSE	CD3G	169.5	4	0	0	0.67438536	up	FALSE	0	CD3G	19698	0.28462838
3197	3.20354488	1.21E-05	0.3121542	0	4	5	FALSE	NFATC1	28.75	4	0	0	0.63274252	TF_other	FALSE	0	NFATC1	3930	0.32267442
3199	3.09777015	3.40E-05	0.32281285	0	6	5	FALSE	NFATC2	31.83333333	6	0	0	0.65037164	TF_other	FALSE	0	NFATC2	10518	0.23717949
3203	2.29273871	0.00336496	0.4361596	0.03692308	26	4	FALSE	CD44	125.3846154	26	0	0	0.78454355	up	FALSE	0	CD44	820852	0.10243779
3205	3.05946255	2.47E-05	0.32685479	0	6	5	FALSE	SNAI2	35.66666667	6	0	0	0.65675624	TF_other	FALSE	0	SNAI2	7802	0.24242424
3208	2.46826758	4.98E-04	0.40514246	0.05072464	24	4	FALSE	SMARCB1	109.4583333	24	0	0	0.75528874	TF_up	FALSE	0	SMARCB1	238798	0.11707841
3210	2.93882218	2.98E-06	0.34027237	0.33333333	3	4	FALSE	SMARCA4	101.6666667	3	0	0	0.67686297	TF_other	FALSE	0	SMARCA4	354	0.37952559
3217	3.29216695	0	0.3037513	0	1	5	FALSE	SMARCA1	26	1	0	0	0.61797217	TF_other	FALSE	0	SMARCA1	0	0
3221	3.06689537	7.09E-05	0.32606264	0	8	5	FALSE	HMGA1	26.375	8	0	0	0.65551744	TF_other	FALSE	0	HMGA1	14902	0.18125
3232	3.17667238	1.27E-06	0.31479482	0	2	5	FALSE	IKBKB	43.5	2	0	0	0.63722127	TF_other	FALSE	0	IKBKB	178	0.55194805
3236	2.85363065	2.58E-05	0.35043078	0	3	5	FALSE	CD48	318	3	0	0	0.69106156	up	FALSE	0	CD48	37016	0.46075581
3240	2.37449971	3.32E-04	0.42114134	0.02564103	13	4	FALSE	CD53	206.0769231	13	0	0	0.77091671	up	FALSE	0	CD53	468100	0.18249573
3254	2.33218982	0.00100831	0.42878156	0.05376344	31	4	FALSE	CD68	100.7741936	31	0	0	0.77796836	up	FALSE	0	CD68	472698	0.08747331
3256	2.40937679	0.00137061	0.41504509	0.13333333	15	4	FALSE	IRF8	148	15	0	0	0.76510387	TF_up	FALSE	0	IRF8	287748	0.14056454
3264	2.39050886	9.28E-04	0.41832098	0.11764706	17	4	FALSE	IRF4	145.8823529	17	0	0	0.76824852	TF_up	FALSE	0	IRF4	380012	0.13436076
3288	2.34877073	0.00133483	0.42575463	0.22857143	15	4	FALSE	CD69	191.4	15	0	0	0.77520488	up	FALSE	0	CD69	336194	0.16719114
3295	3.34819897	0	0.29866803	0	1	5	FALSE	SLA2	15	1	0	0	0.6086335	TF_other	FALSE	0	SLA2	0	0
3305	2.69296741	8.71E-05	0.37133758	0.06666667	10	5	FALSE	CD72	135.7	10	0	0	0.71783877	up	FALSE	0	CD72	86128	0.18183042
3316	2.71069182	0.00260558	0.36890951	0.08333333	9	5	FALSE	CD79A	115.8888889	9	0	0	0.7148847	up	FALSE	0	CD79A	647346	0.15820759
3318	3.71012007	0	0.26953306	0	1	6	FALSE	EBF1	9	1	0	0	0.54831332	TF_other	FALSE	0	EBF1	0	0
3321	3.71012007	0	0.26953306	0	1	6	FALSE	CHD4	9	1	0	0	0.54831332	TF_other	FALSE	0	CHD4	0	0
3328	2.83533448	8.06E-04	0.35269208	0	8	5	FALSE	CD80	136.875	8	0	0	0.69411092	up	FALSE	0	CD80	142852	0.19410714
3334	2.94854202	3.13E-05	0.33915067	0	6	4	FALSE	BCL6	47.16666667	6	0	0	0.675243	TF_other	FALSE	0	BCL6	11450	0.20072464
3338	2.61578045	2.05E-04	0.38229508	0.01282051	13	5	FALSE	CD84	113.2307692	13	0	0	0.73070326	up	FALSE	0	CD84	128192	0.13655482
3352	2.49914237	8.21E-04	0.40013727	0.03030303	12	4	FALSE	CD86	152.75	12	0	0	0.75014294	up	FALSE	0	CD86	322240	0.16187433
3365	2.40194397	2.13E-04	0.41632945	0.12380952	15	5	FALSE	CD93	179.4666667	15	0	0	0.76634267	up	FALSE	0	CD93	267714	0.16406966
3381	2.39851344	2.54E-04	0.41692491	0.125	16	4	FALSE	CD96	173.75	16	0	0	0.76691443	up	FALSE	0	CD96	348238	0.16044172
3398	2.60205832	8.57E-05	0.38431114	0	7	5	FALSE	CD99L2	261.7142857	7	0	0	0.73299028	up	FALSE	0	CD99L2	168542	0.28185328
3406	2.5946255	1.99E-04	0.38541208	0	14	5	FALSE	CDA	176.2857143	14	0	0	0.73422908	up	FALSE	0	CDA	322942	0.18929343
3421	2.74842767	5.10E-05	0.36384439	0	9	5	FALSE	CDC42EP1	193	9	0	0	0.70859539	up	FALSE	0	CDC42EP1	114882	0.24521073
3431	2.48885077	2.23E-04	0.40179187	0.03333333	16	5	FALSE	CDH12	117.5	16	0	0	0.7518582	down	FALSE	0	CDH12	232628	0.12460021
3440	3.02401372	2.00E-04	0.33068633	0	20	5	FALSE	PRRX2	26.85	20	0	0	0.66266438	TF_other	FALSE	0	PRRX2	164062	0.13324742
3449	3.39279588	2.11E-05	0.29474216	0	5	5	FALSE	CDH19	78.2	5	0	0	0.60120069	up	FALSE	0	CDH19	11758	0.2980695
3455	2.5997713	4.44E-04	0.38464922	0	21	5	FALSE	CDH5	104.8571429	21	0	0	0.73337145	up	FALSE	0	CDH5	314384	0.11338116
3477	2.68496284	5.23E-05	0.37244463	0	4	5	FALSE	CDKL4	300.25	4	0	0	0.71917286	down	FALSE	0	CDKL4	102492	0.35795455
3482	2.39108062	3.37E-04	0.41822095	0.025	16	5	FALSE	CDKN3	171.625	16	0	0	0.76815323	up	FALSE	0	CDKN3	505682	0.15633577
3499	2.95197256	7.98E-04	0.33875654	0	14	5	FALSE	CEACAM1	75.57142857	14	0	0	0.67467124	up	FALSE	0	CEACAM1	367798	0.13036963
3507	3.61177816	1.41E-06	0.27687193	0	2	6	FALSE	HNF4G	13.5	2	0	0	0.56470364	TF_other	FALSE	0	HNF4G	520	0.5
3515	3.52144082	0	0.28397467	0	1	5	FALSE	CEACAM3	153	1	0	0	0.57975986	up	FALSE	0	CEACAM3	0	0
3517	2.7301315	1.85E-05	0.36628272	0	3	5	FALSE	CECR1	366	3	0	0	0.71164475	up	FALSE	0	CECR1	55046	0.45682103
3521	2.67581475	5.51E-05	0.37371795	0	4	5	FALSE	CENPP	355	4	0	0	0.72069754	down	FALSE	0	CENPP	110912	0.4159812
3526	3.66209262	0	0.27306792	0	1	5	FALSE	CENPU	91	1	0	0	0.5563179	up	FALSE	0	CENPU	0	0
3528	2.48198971	8.75E-04	0.40290256	0.02	25	4	FALSE	CFB	112	25	0	0	0.75300172	up	FALSE	0	CFB	572854	0.11897326
3537	3.30874786	1.94E-06	0.30222913	0	3	5	FALSE	CREB5	16	3	0	0	0.61520869	TF_other	FALSE	0	CREB5	1986	0.36585366
3555	2.89479703	2.59E-05	0.34544736	0	4	5	FALSE	CFI	212.5	4	0	0	0.6842005	up	FALSE	0	CFI	25290	0.33359621
3560	3.53516295	4.43E-06	0.28287239	0	4	5	FALSE	CFP	94	4	0	0	0.57747284	up	FALSE	0	CFP	3428	0.46969697
3565	3.02344197	1.23E-05	0.33074887	0	4	5	FALSE	CGNL1	170.25	4	0	0	0.66275967	down	FALSE	0	CGNL1	20284	0.31226937
3570	2.47169811	8.05E-05	0.40458015	0.16666667	12	5	FALSE	CH25H	173.1666667	12	0	0	0.75471698	up	FALSE	0	CH25H	153542	0.17908903
3583	2.47284162	3.87E-04	0.40439306	0.01709402	27	5	FALSE	CHAC1	87.48148148	27	0	0	0.7545264	down	FALSE	0	CHAC1	275842	0.09407889
3611	2.44253859	0.00100528	0.40941011	0.02857143	21	4	FALSE	CHI3L1	116.0476191	21	0	0	0.7595769	up	FALSE	0	CHI3L1	419668	0.11766419
3621	3.3670669	1.50E-07	0.2969944	0	2	5	FALSE	NFIX	21	2	0	0	0.60548885	TF_other	FALSE	0	NFIX	64	0.66666667
3628	3.1137793	2.04E-05	0.32115314	0	10	5	FALSE	TRIM28	21.6	10	0	0	0.64770345	TF_other	FALSE	0	TRIM28	23418	0.18727273
3635	2.44311035	1.90E-04	0.4093143	0	7	5	FALSE	CHI3L2	356.4285714	7	0	0	0.75948161	up	FALSE	0	CHI3L2	425834	0.33093908
3643	2.95540309	2.51E-05	0.33836332	0	4	5	FALSE	CHP2	229.75	4	0	0	0.67409949	down	FALSE	0	CHP2	23682	0.38903061
3648	2.67295597	1.16E-04	0.37411765	0.01960784	18	5	FALSE	CHRDL1	100.1111111	18	0	0	0.721174	down	FALSE	0	CHRDL1	117450	0.1569247
3667	3.0383076	0	0.3291306	0	1	5	FALSE	CHRDL2	518	1	0	0	0.66028207	up	FALSE	0	CHRDL2	0	0
3669	2.46883934	3.73E-04	0.40504863	0.02380952	21	5	FALSE	CHRM2	108.8571429	21	0	0	0.75519344	down	FALSE	0	CHRM2	338378	0.11218139
3691	2.78502001	2.30E-05	0.35906385	0	3	5	FALSE	CHRM3	369.6666667	3	0	0	0.70249666	down	FALSE	0	CHRM3	56158	0.49286988
3695	2.72898799	7.31E-05	0.3664362	0	8	5	FALSE	CHRNA4	173.25	8	0	0	0.71183533	down	FALSE	0	CHRNA4	125866	0.22055058
3704	2.43682104	3.39E-04	0.41037072	0	17	5	FALSE	CHST11	205.5882353	17	0	0	0.76052983	up	FALSE	0	CHST11	707288	0.19031464
3722	2.37106918	6.13E-04	0.42175066	0.01709402	27	5	FALSE	CHST15	143.5185185	27	0	0	0.77148847	up	FALSE	0	CHST15	847970	0.1302717
3737	2.94854202	1.82E-04	0.33915067	0.01169591	19	5	FALSE	KLF12	27.94736842	19	0	0	0.675243	TF_other	FALSE	0	KLF12	115610	0.10629515
3751	2.41738136	0.00415668	0.41367077	0.05291005	28	4	FALSE	CIITA	69.64285714	28	0	0	0.76376977	TF_up	FALSE	0	CIITA	316920	0.06809571
3755	3.41680961	0	0.29267068	0	1	5	FALSE	PRDM1	28	1	0	0	0.5971984	TF_other	FALSE	0	PRDM1	0	0
3770	2.78444826	4.11E-05	0.35913758	0	8	5	FALSE	CKAP2L	205.875	8	0	0	0.70259196	up	FALSE	0	CKAP2L	109434	0.27244016
3779	2.85134362	4.21E-05	0.35071185	0.06666667	6	5	FALSE	CLC	117.6666667	6	0	0	0.69144273	up	FALSE	0	CLC	21212	0.22674419
3780	3.02630074	6.04E-05	0.33043643	0.07142857	8	5	FALSE	RUNX2	35.875	8	0	0	0.66228321	TF_other	FALSE	0	RUNX2	15144	0.1780303
3787	2.44196684	4.40E-04	0.40950597	0.01538462	26	5	FALSE	CLDN5	130.6923077	26	0	0	0.75967219	up	FALSE	0	CLDN5	680078	0.12889194
3814	3.20240137	1.11E-05	0.31226567	0	2	5	FALSE	CLEC10A	223.5	2	0	0	0.6329331	up	FALSE	0	CLEC10A	4100	0.50683371
3817	3.50943396	1.52E-05	0.28494624	0	6	5	FALSE	CLEC14A	55.16666667	6	0	0	0.58176101	up	FALSE	0	CLEC14A	7550	0.29121864
3824	2.7941681	4.18E-05	0.35788828	0	3	5	FALSE	CLEC2B	313.3333333	3	0	0	0.70097198	up	FALSE	0	CLEC2B	46382	0.4232159
3828	2.63178959	4.86E-05	0.37996959	0	3	5	FALSE	CLEC4A	450	3	0	0	0.72803507	up	FALSE	0	CLEC4A	118042	0.50167598
3832	2.77987421	1.16E-05	0.35972851	0	3	5	FALSE	CLEC4C	187.3333333	3	0	0	0.7033543	up	FALSE	0	CLEC4C	5264	0.36111111
3836	3.01257862	5.40E-05	0.33194154	0	9	5	FALSE	CLEC4D	95.33333333	9	0	0	0.66457023	up	FALSE	0	CLEC4D	44496	0.17308869
3846	3.0383076	0	0.3291306	0	1	5	FALSE	CLEC4GP1	518	1	0	0	0.66028207	down	FALSE	0	CLEC4GP1	0	0
3848	3.36249285	1.02E-05	0.2973984	0	4	5	FALSE	CLEC7A	80	4	0	0	0.60625119	up	FALSE	0	CLEC7A	5878	0.29151292
3853	2.97255575	6.12E-05	0.33641085	0	4	5	FALSE	CLGN	162.25	4	0	0	0.67124071	down	FALSE	0	CLGN	17842	0.28190559
3856	3.15780446	1.47E-05	0.31667572	0	5	5	FALSE	HDAC9	21.2	5	0	0	0.64036592	TF_other	FALSE	0	HDAC9	7806	0.24634146
3859	3.0383076	0	0.3291306	0	1	5	FALSE	CLIC2	518	1	0	0	0.66028207	up	FALSE	0	CLIC2	0	0
3861	2.58662093	4.73E-04	0.38660477	0	19	5	FALSE	CLSPN	105.5789474	19	0	0	0.73556318	up	FALSE	0	CLSPN	334220	0.1112542
3879	3.1841052	4.45E-06	0.31405997	0	6	5	FALSE	RBL2	20.83333333	6	0	0	0.63598247	TF_other	FALSE	0	RBL2	6422	0.2960199
3882	2.92681532	2.30E-05	0.34166829	0	6	5	FALSE	CLVS2	181.8333333	6	0	0	0.67886411	up	FALSE	0	CLVS2	50086	0.28841042
3889	2.58833619	3.88E-05	0.38634858	0.26666667	6	5	FALSE	CMBL	272.1666667	6	0	0	0.7352773	down	FALSE	0	CMBL	100386	0.31014823
3896	2.60377358	6.54E-05	0.38405797	0	6	5	FALSE	CMKLR1	307.8333333	6	0	0	0.7327044	up	FALSE	0	CMKLR1	167194	0.33063937
3903	2.73470555	2.40E-05	0.36567008	0.2	5	5	FALSE	CMTM2	168.8	5	0	0	0.71088241	up	FALSE	0	CMTM2	30180	0.25907692
3909	2.65751858	2.54E-04	0.37629088	0.01515152	12	5	FALSE	CNN1	107.5	12	0	0	0.7237469	up	FALSE	0	CNN1	105176	0.1427934
3922	2.69068039	0.00222493	0.37165321	0	33	5	FALSE	CNTFR	97.3030303	33	0	0	0.71821994	down	FALSE	0	CNTFR	3518522	0.11758612
3943	3.69010863	0	0.27099473	0	1	6	FALSE	NR2C1	33	1	0	0	0.55164856	TF_other	FALSE	0	NR2C1	0	0
3957	2.48827902	2.21E-04	0.40188419	0.05147059	17	5	FALSE	CNTN1	140.4117647	17	0	0	0.7519535	down	FALSE	0	CNTN1	290234	0.14332208
3975	2.87650086	6.45E-05	0.3476446	0.04545455	12	5	FALSE	CNTN3	64.91666667	12	0	0	0.68724986	down	FALSE	0	CNTN3	30056	0.14872685
3988	2.63750715	1.64E-04	0.37914589	0	10	5	FALSE	CNTN4	153.2	10	0	0	0.72708214	down	FALSE	0	CNTN4	204642	0.16929922
3999	2.67753002	1.94E-04	0.37347854	0.02857143	15	5	FALSE	CNTN6	81.46666667	15	0	0	0.72041166	down	FALSE	0	CNTN6	130386	0.11872549
4015	2.67238422	1.50E-04	0.37419769	0.02564103	13	5	FALSE	CNTNAP4	97.07692308	13	0	0	0.7212693	down	FALSE	0	CNTNAP4	113284	0.13777925
4029	3.01315037	5.13E-05	0.33187856	0	11	5	FALSE	COG8	110.6363636	11	0	0	0.66447494	up	FALSE	0	COG8	64828	0.20006636
4041	2.70726129	1.85E-04	0.36937698	0	10	5	FALSE	COL10A1	132.7	10	0	0	0.71545645	up	FALSE	0	COL10A1	104892	0.16041413
4042	3.02801601	1.21E-04	0.33024924	0	22	5	FALSE	VSX2	21.77272727	22	0	0	0.66199733	TF_other	FALSE	0	VSX2	106648	0.11413586
4053	2.49857061	6.16E-04	0.40022883	0.03952569	23	5	FALSE	COL11A1	94.95652174	23	0	0	0.75023823	down	FALSE	0	COL11A1	313018	0.10261627
4054	3.2378502	1.41E-06	0.3088469	0	3	6	FALSE	CEBPZ	22	3	0	0	0.62702497	TF_other	FALSE	0	CEBPZ	586	0.38888889
4078	2.37106918	6.76E-04	0.42175066	0.04926108	29	4	FALSE	COL12A1	128.5172414	29	0	0	0.77148847	up	FALSE	0	COL12A1	794512	0.11671329
4108	2.34591195	7.04E-04	0.42627346	0.02910053	28	4	FALSE	COL13A1	110.25	28	0	0	0.77568134	up	FALSE	0	COL13A1	563058	0.09725567
4137	2.7787307	1.26E-04	0.35987654	0	13	5	FALSE	COL14A1	125.7692308	13	0	0	0.70354488	up	FALSE	0	COL14A1	169134	0.16613746
4151	2.42367067	3.39E-04	0.41259731	0.02197802	14	5	FALSE	COL15A1	195.7142857	14	0	0	0.76272156	up	FALSE	0	COL15A1	533904	0.18116038
4166	3.18696398	0	0.31377826	0	1	5	FALSE	COL21A1	414	1	0	0	0.635506	down	FALSE	0	COL21A1	0	0
4168	2.36134934	2.51E-04	0.42348668	0.12820513	13	4	FALSE	COL23A1	226.9230769	13	0	0	0.77310844	up	FALSE	0	COL23A1	400940	0.19819638
4182	2.46140652	1.97E-04	0.40627178	0.06666667	10	5	FALSE	COL25A1	221.7	10	0	0	0.75643225	down	FALSE	0	COL25A1	289516	0.21847826
4193	2.53001715	0.00142936	0.39525424	0	19	5	FALSE	COL4A1	135.2631579	19	0	0	0.74499714	up	FALSE	0	COL4A1	1126136	0.13575648
4209	3.5294454	0	0.28333063	0	1	6	FALSE	LMX1B	19	1	0	0	0.57842577	TF_other	FALSE	0	LMX1B	0	0
4214	2.81646655	1.37E-04	0.35505481	0	10	5	FALSE	COLEC11	121.5	10	0	0	0.69725557	up	FALSE	0	COLEC11	101514	0.16529492
4219	3.00914808	3.78E-05	0.33231997	0	11	5	FALSE	GATA6	29.09090909	11	0	0	0.66514199	TF_other	FALSE	0	GATA6	27826	0.14259345
4222	3.1572327	1.40E-05	0.31673307	0	9	5	FALSE	GATA-6	22.33333333	9	0	0	0.64046122	TF_other	FALSE	0	GATA-6	19882	0.19937695
4227	2.98627787	3.82E-06	0.33486502	0	2	5	FALSE	CORO1A	302.5	2	0	0	0.66895369	up	FALSE	0	CORO1A	5604	0.53362832
4230	2.6112064	7.32E-05	0.38296475	0	7	5	FALSE	CPA3	272.1428571	7	0	0	0.7314656	up	FALSE	0	CPA3	172766	0.29536259
4238	2.63236135	6.22E-05	0.37988705	0	4	5	FALSE	CPVL	360	4	0	0	0.72793978	up	FALSE	0	CPVL	146310	0.40291807
4243	2.84734134	2.63E-05	0.35120482	0	6	5	FALSE	CR1L	208	6	0	0	0.69210978	up	FALSE	0	CR1L	47366	0.29913295
4250	2.85248714	1.81E-04	0.35057126	0	11	5	FALSE	CRABP1	69.27272727	11	0	0	0.69125214	down	FALSE	0	CRABP1	42286	0.16530927
4262	2.48313322	8.84E-04	0.40271702	0.07352941	17	5	FALSE	CRABP2	109.5882353	17	0	0	0.75281113	down	FALSE	0	CRABP2	235716	0.1118552
4266	3.17610063	1.13E-05	0.31485149	0	4	5	FALSE	RARB	24.5	4	0	0	0.63731656	TF_other	FALSE	0	RARB	2542	0.30128205
4281	3.04688393	5.11E-05	0.32820417	0	11	5	FALSE	CRISPLD1	103	11	0	0	0.65885268	down	FALSE	0	CRISPLD1	69510	0.20318725
4293	2.89994282	6.83E-06	0.34483438	0	3	5	FALSE	CRYM	344.6666667	3	0	0	0.68334286	down	FALSE	0	CRYM	20858	0.53447382
4297	3.07604345	6.07E-06	0.32509294	0	3	5	FALSE	CSF2RA	88	3	0	0	0.65399276	up	FALSE	0	CSF2RA	964	0.36099585
4301	2.63121784	3.88E-05	0.38005215	0.16666667	4	5	FALSE	CSF2RB	288	4	0	0	0.72813036	up	FALSE	0	CSF2RB	62598	0.34596871
4306	2.3670669	7.82E-04	0.42246377	0.05873016	36	5	FALSE	CSF3	108.6111111	36	0	0	0.77215552	up	FALSE	0	CSF3	629998	0.09717235
4343	2.50600343	3.74E-04	0.39904175	0.01169591	19	5	FALSE	CSF3R	143.9473684	19	0	0	0.74899943	up	FALSE	0	CSF3R	377976	0.14455077
4363	2.34534019	3.97E-04	0.42637738	0.09401709	27	4	FALSE	CSRNP1	141.2592593	27	0	0	0.77577663	up	FALSE	0	CSRNP1	497480	0.12246999
4391	3.0320183	4.99E-06	0.32981331	0	2	5	FALSE	CST7	274.5	2	0	0	0.66133028	up	FALSE	0	CST7	3938	0.51603774
4394	2.58833619	6.22E-05	0.38634858	0.08888889	10	5	FALSE	CSTA	144.7	10	0	0	0.7352773	up	FALSE	0	CSTA	83514	0.18253165
4405	2.46369354	0.0013897	0.40589464	0.01185771	23	4	FALSE	CTLA4	85.95652174	23	0	0	0.75605108	up	FALSE	0	CTLA4	354336	0.08989486
4406	3.15666095	1.92E-06	0.31679044	0	2	5	FALSE	MSC	38	2	0	0	0.64055651	TF_other	FALSE	0	MSC	258	0.51388889
4430	2.40080046	8.46E-04	0.41652774	0.02153846	26	4	FALSE	CTNNA3	101.6538462	26	0	0	0.76653326	down	FALSE	0	CTNNA3	504814	0.09591643
4457	2.50543168	0.00254531	0.39913282	0.04761905	22	5	FALSE	CTSD	100.9090909	22	0	0	0.74909472	up	FALSE	0	CTSD	637074	0.1099065
4461	3.50485992	0	0.28531811	0	1	6	FALSE	ER	22	1	0	0	0.58252335	TF_other	FALSE	0	ER	0	0
4466	3.50485992	0	0.28531811	0	1	6	FALSE	NFATC3	22	1	0	0	0.58252335	TF_other	FALSE	0	NFATC3	0	0
4482	2.62321326	6.81E-05	0.38121186	0	6	5	FALSE	CTSH	273.3333333	6	0	0	0.72946446	up	FALSE	0	CTSH	156400	0.30737397
4489	2.88564894	6.48E-06	0.3465425	0	2	5	FALSE	CTSS	248.5	2	0	0	0.68572518	up	FALSE	0	CTSS	2858	0.51242236
4492	2.47455689	2.81E-04	0.40411275	0	11	5	FALSE	CUBN	251.0909091	11	0	0	0.75424052	down	FALSE	0	CUBN	505046	0.24047203
4504	2.80674671	3.92E-04	0.35628438	0	16	5	FALSE	CXCL1	104.5	16	0	0	0.69887555	up	FALSE	0	CXCL1	176556	0.14475524
4511	3.16523728	7.36E-06	0.31593208	0	4	5	FALSE	PARP1	27.75	4	0	0	0.63912712	TF_other	FALSE	0	PARP1	3788	0.29076087
4522	2.83018868	5.11E-04	0.35333333	0	23	5	FALSE	CXCL10	58.73913043	23	0	0	0.69496855	up	FALSE	0	CXCL10	150600	0.11831789
4546	3.35506003	1.23E-05	0.29805726	0	6	5	FALSE	CXCL11	92	6	0	0	0.60748999	up	FALSE	0	CXCL11	10560	0.36546185
4553	2.48198971	5.06E-04	0.40290256	0	16	5	FALSE	CXCL13	166.625	16	0	0	0.75300172	up	FALSE	0	CXCL13	548076	0.160645
4570	2.46426529	8.42E-04	0.40580046	0	19	5	FALSE	CXCL2	168.7894737	19	0	0	0.75595578	up	FALSE	0	CXCL2	642134	0.15889155
4586	3.2378502	7.23E-06	0.3088469	0	4	5	FALSE	SMAD1	24.25	4	0	0	0.62702497	TF_other	FALSE	0	SMAD1	5084	0.30592105
4591	2.65866209	1.25E-04	0.37612903	0	11	5	FALSE	CXCL3	159.0909091	11	0	0	0.72355632	up	FALSE	0	CXCL3	184640	0.18404064
4603	2.47970269	9.85E-04	0.40327415	0	18	5	FALSE	CXCL5	148.5555556	18	0	0	0.75338289	up	FALSE	0	CXCL5	586028	0.14270363
4604	3.31789594	2.31E-06	0.30139583	0	3	5	FALSE	ZNF148	11	3	0	0	0.61368401	TF_other	FALSE	0	ZNF148	870	0.37037037
4623	2.52715838	2.64E-04	0.39570136	0	15	5	FALSE	CXCL6	171.0666667	15	0	0	0.7454736	up	FALSE	0	CXCL6	405908	0.17178451
4639	2.58490566	2.06E-04	0.38686131	0.02941176	17	5	FALSE	CXCL9	117.1176471	17	0	0	0.73584906	up	FALSE	0	CXCL9	193908	0.14266148
4657	3.1240709	0	0.32009517	1	2	5	FALSE	CXCR1	107.5	2	0	0	0.64598818	up	FALSE	0	CXCR1	0	0.51682692
4660	2.89594054	1.60E-05	0.34531096	0	6	5	FALSE	CXCR2	121	6	0	0	0.68400991	up	FALSE	0	CXCR2	17664	0.26431718
4667	3.82218411	1.00E-06	0.26163052	0	2	6	FALSE	CXCR2P1	49	2	0	0	0.52963598	up	FALSE	0	CXCR2P1	464	0.50526316
4670	3.00686106	1.09E-04	0.33257273	0	3	5	FALSE	CXCR3	200	3	0	0	0.66552316	up	FALSE	0	CXCR3	22658	0.36513761
4674	2.26700972	0.00666684	0.44110971	0.02035153	47	4	FALSE	CXCR4	98.27659574	47	0	0	0.78883171	up	FALSE	0	CXCR4	2065434	0.07980462
4690	3.26643796	0	0.30614388	0	1	5	FALSE	NRF1	47	1	0	0	0.62226034	TF_other	FALSE	0	NRF1	0	0
4708	3.03259005	7.71E-05	0.32975113	0	9	5	FALSE	GLI1	29.33333333	9	0	0	0.66123499	TF_other	FALSE	0	GLI1	36652	0.15653775
4711	3.26643796	0	0.30614388	0	1	5	FALSE	CREB3	47	1	0	0	0.62226034	TF_other	FALSE	0	CREB3	0	0
4725	2.65637507	1.14E-04	0.37645286	0	10	5	FALSE	CXorf21	187.4	10	0	0	0.72393749	up	FALSE	0	CXorf21	215076	0.21674419
4736	2.66209262	9.21E-05	0.37564433	0	10	5	FALSE	CXorf36	177.2	10	0	0	0.72298456	up	FALSE	0	CXorf36	162284	0.20440835
4747	2.41738136	0.00109619	0.41367077	0.03333333	25	4	FALSE	CYBB	118	25	0	0	0.76376977	up	FALSE	0	CYBB	534412	0.11277618
4766	3.16981132	0	0.31547619	1	2	5	FALSE	SATB1	54	2	0	0	0.63836478	TF_other	FALSE	0	SATB1	0	0.51923077
4774	2.33562035	0.00382956	0.42815177	0.01609195	30	4	FALSE	CYP1A1	128.6	30	0	0	0.77739661	up	FALSE	0	CYP1A1	1508928	0.11099537
4789	3.3350486	0	0.29984571	0	1	5	FALSE	KLF16	30	1	0	0	0.61082523	TF_other	FALSE	0	KLF16	0	0
4797	3.3350486	0	0.29984571	0	1	5	FALSE	XRCC5	30	1	0	0	0.61082523	TF_other	FALSE	0	XRCC5	0	0
4807	2.61292167	5.02E-05	0.38271335	0.05555556	9	5	FALSE	CYP2S1	170.7777778	9	0	0	0.73117972	up	FALSE	0	CYP2S1	79288	0.21370743
4817	3.65866209	1.64E-05	0.27332396	0	5	6	FALSE	CYP4A11	33	5	0	0	0.55688965	up	FALSE	0	CYP4A11	5136	0.31683168
4821	3.12464265	1.00E-04	0.3200366	0	7	5	FALSE	PPARD	22	7	0	0	0.64589289	TF_other	FALSE	0	PPARD	55128	0.20588235
4824	2.37049743	0.00109683	0.42185239	0.03968254	28	4	FALSE	CYR61	104.8571429	28	0	0	0.77158376	up	FALSE	0	CYR61	513508	0.09565274
4833	3.16466552	5.15E-06	0.31598916	0	4	5	FALSE	SMAD2	29.5	4	0	0	0.63922241	TF_other	FALSE	0	SMAD2	1460	0.31318681
4853	3.02630074	3.28E-05	0.33043643	0	9	5	FALSE	SMAD3	33.22222222	9	0	0	0.66228321	TF_other	FALSE	0	SMAD3	8862	0.18308081
4855	2.73927959	3.56E-05	0.36505949	0	5	5	FALSE	CYTIP	255.8	5	0	0	0.71012007	up	FALSE	0	CYTIP	81364	0.3157373
4861	2.65580332	1.21E-04	0.37653391	0	10	5	FALSE	DAPP1	174.4	10	0	0	0.72403278	up	FALSE	0	DAPP1	167958	0.20116009
4872	2.60548885	1.42E-04	0.38380513	0	12	5	FALSE	DARC	177.1666667	12	0	0	0.73241852	up	FALSE	0	DARC	227790	0.19148551
4885	3.50657519	0	0.28517854	0	1	5	FALSE	DAZ1	203	1	0	0	0.58223747	up	FALSE	0	DAZ1	0	0
4887	3.38536306	6.13E-06	0.29538929	0	3	5	FALSE	DAZ3	91.33333333	3	0	0	0.60243949	up	FALSE	0	DAZ3	3664	0.37174211
4891	2.30074328	0.00140001	0.43464215	0.05546218	35	4	FALSE	DBP	131.0857143	35	0	0	0.78320945	TF_down	FALSE	0	DBP	1021792	0.1097757
4915	3.06575186	1.39E-05	0.32618426	0	5	5	FALSE	ZNF263	33.8	5	0	0	0.65570802	TF_other	FALSE	0	ZNF263	2602	0.25230769
4927	2.46197827	4.64E-04	0.40617743	0	19	5	FALSE	DCHS2	158.5789474	19	0	0	0.75633695	up	FALSE	0	DCHS2	584492	0.1505052
4947	3.21955403	0	0.31060202	0	1	5	FALSE	DCXR	425	1	0	0	0.63007433	down	FALSE	0	DCXR	0	0
4949	2.47341338	1.83E-04	0.40429958	0.00952381	15	5	FALSE	DEF6	136	15	0	0	0.7544311	up	FALSE	0	DEF6	235082	0.14284708
4965	2.79016581	1.15E-05	0.35840164	0	2	5	FALSE	DENND1C	466.5	2	0	0	0.70163903	up	FALSE	0	DENND1C	35070	0.62651413
4968	2.6918239	1.35E-04	0.37149533	0.01754386	19	5	FALSE	DERL3	78.94736842	19	0	0	0.71802935	up	FALSE	0	DERL3	117120	0.12729299
4988	2.69868496	0.00141179	0.37055085	0	12	5	FALSE	DHFR	135.9166667	12	0	0	0.71688584	up	FALSE	0	DHFR	1048468	0.16433212
4997	3.69811321	0	0.27040816	0	1	6	FALSE	TFDP1	12	1	0	0	0.55031447	TF_other	FALSE	0	TFDP1	0	0
5002	3.24413951	0.00114613	0.30824815	0	4	5	FALSE	DHRS2	103.5	4	0	0	0.62597675	down	FALSE	0	DHRS2	870210	0.3041543
5006	4.24356775	0	0.23565077	0	1	6	FALSE	MYBL1	4	1	0	0	0.45940537	TF_other	FALSE	0	MYBL1	0	0
5008	2.30931961	4.65E-04	0.43302798	0.11052632	20	4	FALSE	DHRS9	168.45	20	0	0	0.78178006	up	FALSE	0	DHRS9	497638	0.14035088
5029	2.67238422	9.95E-05	0.37419769	0	13	5	FALSE	DKFZp566F0947	108.2307692	13	0	0	0.7212693	down	FALSE	0	DKFZp566F0947	95556	0.15585868
5043	2.44311035	3.41E-04	0.4093143	0.03676471	17	5	FALSE	DKK2	131.0588235	17	0	0	0.75948161	up	FALSE	0	DKK2	388686	0.1284845
5061	2.35105775	9.04E-04	0.42534047	0.02317291	34	4	FALSE	DLGAP1	125.1764706	34	0	0	0.77482371	up	FALSE	0	DLGAP1	1042726	0.11272292
5096	2.59576901	6.02E-05	0.38524229	0	4	5	FALSE	DLGAP5	387.5	4	0	0	0.7340385	up	FALSE	0	DLGAP5	153210	0.41248666
5101	2.30531732	0.00127929	0.43377976	0.02804878	41	5	FALSE	DLX1	126.4878049	41	0	0	0.78244711	down	FALSE	0	DLX1	1680364	0.10671765
5143	2.38765009	6.68E-04	0.41882184	0.0302521	35	5	FALSE	DLX4	131.7428571	35	0	0	0.76872499	down	FALSE	0	DLX4	1076514	0.11816896
5179	3.26129217	2.17E-05	0.30662693	0	6	5	FALSE	DMRTA1	94.16666667	6	0	0	0.62311797	up	FALSE	0	DMRTA1	15050	0.30347448
5186	2.69925672	6.12E-05	0.37047236	0	6	5	FALSE	DNAJC5B	218	6	0	0	0.71679055	up	FALSE	0	DNAJC5B	85126	0.26176116
5193	2.60777587	1.65E-04	0.38346854	0.01470588	17	5	FALSE	DOC2B	131.1176471	17	0	0	0.73203735	up	FALSE	0	DOC2B	214354	0.16704374
5211	2.51114923	2.39E-04	0.39822404	0	18	5	FALSE	DOCK2	175.4444444	18	0	0	0.7481418	up	FALSE	0	DOCK2	503222	0.17357656
5230	2.46369354	2.48E-04	0.40589464	0.0952381	15	4	FALSE	DOCK8	152	15	0	0	0.75605108	up	FALSE	0	DOCK8	328732	0.1495069
5246	2.44025157	2.38E-04	0.40979381	0	10	5	FALSE	DOK2	287.5	10	0	0	0.75995807	up	FALSE	0	DOK2	546534	0.26700839
5257	2.79016581	1.15E-05	0.35840164	0	2	5	FALSE	DPEP2	466.5	2	0	0	0.70163903	up	FALSE	0	DPEP2	35070	0.62651413
5260	2.66094911	6.08E-05	0.37580576	0	6	5	FALSE	DPH1	255.5	6	0	0	0.72317515	down	FALSE	0	DPH1	137330	0.2918578
5267	2.46712407	3.38E-04	0.40533024	0.22222222	9	4	FALSE	DPP4	222.6666667	9	0	0	0.75547932	up	FALSE	0	DPP4	147386	0.22617837
5270	3.22984563	6.87E-06	0.30961232	0	4	5	FALSE	HNF1B	18.25	4	0	0	0.62835906	TF_other	FALSE	0	HNF1B	1104	0.31944444
5278	2.28073185	0.00102812	0.43845575	0.05492424	33	4	FALSE	DPP6	144.7575758	33	0	0	0.78654469	down	FALSE	0	DPP6	1291488	0.11651625
5312	2.63979417	2.70E-05	0.37881741	0	3	5	FALSE	DPP9	480	3	0	0	0.72670097	up	FALSE	0	DPP9	87780	0.53941441
5316	2.88965123	3.23E-05	0.34606252	0	8	5	FALSE	DPT	152.625	8	0	0	0.68505813	down	FALSE	0	DPT	60418	0.22938729
5325	2.74899943	3.06E-05	0.36376872	0.06666667	6	5	FALSE	DPYS	182	6	0	0	0.7085001	down	FALSE	0	DPYS	45858	0.25575929
5332	3.5025729	2.71E-05	0.28550441	0	4	5	FALSE	DRAXIN	58.25	4	0	0	0.58290452	up	FALSE	0	DRAXIN	10952	0.27261905
5337	3.23156089	1.10E-05	0.30944798	0	5	5	FALSE	DSG3	115.4	5	0	0	0.62807318	down	FALSE	0	DSG3	17738	0.31171662
5343	2.45225843	4.77E-04	0.40778736	0.02371542	23	5	FALSE	DSP	118.5217391	23	0	0	0.75795693	up	FALSE	0	DSP	416144	0.11794403
5367	2.30017153	0.00154209	0.43475019	0.0302521	35	4	FALSE	DUSP1	133.6857143	35	0	0	0.78330475	up	FALSE	0	DUSP1	1306282	0.1115555
5371	3.22813036	7.60E-07	0.30977683	0	3	5	FALSE	ATM	28.33333333	3	0	0	0.62864494	TF_other	FALSE	0	ATM	980	0.43386243
5404	2.44025157	4.74E-04	0.40979381	0	22	5	FALSE	DUSP2	159.6818182	22	0	0	0.75995807	up	FALSE	0	DUSP2	763276	0.14927735
5427	2.29273871	0.00105004	0.4361596	0.03193277	35	4	FALSE	DUSP5	148.1428571	35	0	0	0.78454355	up	FALSE	0	DUSP5	1638342	0.12031668
5463	2.45168668	1.84E-04	0.40788246	0.1025641	13	5	FALSE	DYSF	189.3846154	13	0	0	0.75805222	up	FALSE	0	DYSF	289876	0.18250668
5477	2.77186964	2.23E-04	0.36076733	0	15	5	FALSE	EAF2	101.6	15	0	0	0.70468839	up	FALSE	0	EAF2	122554	0.16964587
5491	3.14694111	9.92E-06	0.3177689	0	5	5	FALSE	PML	19.8	5	0	0	0.64217648	TF_other	FALSE	0	PML	5666	0.22650602
5494	2.6815323	8.47E-05	0.37292111	0.06666667	10	4	FALSE	ECM2	104.7	10	0	0	0.71974462	down	FALSE	0	ECM2	58472	0.15537313
5505	2.63007433	1.20E-04	0.38021739	0	9	5	FALSE	ECSCR	207.3333333	9	0	0	0.72832095	up	FALSE	0	ECSCR	207678	0.23002601
5515	2.87135506	5.80E-05	0.34826762	0	8	5	FALSE	EDIL3	143.625	8	0	0	0.68810749	down	FALSE	0	EDIL3	68686	0.21351048
5524	2.23499142	0.00509615	0.44742901	0.06976744	44	4	FALSE	EDN1	119.5227273	44	0	0	0.7941681	up	FALSE	0	EDN1	1717322	0.09217367
5529	3.23441967	0	0.30917447	0	1	5	FALSE	NR1H4	44	1	0	0	0.62759672	TF_other	FALSE	0	NR1H4	0	0
5531	3.23441967	0	0.30917447	0	1	5	FALSE	VEZF1	44	1	0	0	0.62759672	TF_other	FALSE	0	VEZF1	0	0
5546	3.21555174	1.44E-06	0.31098862	0	2	5	FALSE	MKL1	28	2	0	0	0.63074138	TF_other	FALSE	0	MKL1	1684	0.51923077
5572	2.73356204	5.54E-05	0.36582305	0	8	5	FALSE	EDNRA	202.375	8	0	0	0.71107299	up	FALSE	0	EDNRA	112438	0.25266625
5581	2.53973699	6.51E-05	0.39374156	0.0952381	7	5	FALSE	EFCAB1	234.7142857	7	0	0	0.74337717	down	FALSE	0	EFCAB1	128576	0.26607143
5589	2.85820469	4.92E-05	0.34986997	0	7	5	FALSE	EFEMP1	158.5714286	7	0	0	0.69029922	down	FALSE	0	EFEMP1	59140	0.23343915
5597	2.42595769	0.00116637	0.41220834	0	21	5	FALSE	EFHD2	154.0952381	21	0	0	0.76234038	up	FALSE	0	EFHD2	827948	0.1411016
5619	2.38307604	0.00201088	0.41962572	0	37	5	FALSE	EFNA5	128.4324324	37	0	0	0.76948733	down	FALSE	0	EFNA5	1891680	0.11480399
5652	3.32761578	7.10E-07	0.30051546	0	2	6	FALSE	E2F6	25	2	0	0	0.61206404	TF_other	FALSE	0	E2F6	1528	0.53333333
5658	2.46255003	3.69E-04	0.40608312	0.01449275	24	5	FALSE	EFNB2	135.625	24	0	0	0.75624166	up	FALSE	0	EFNB2	611752	0.13416252
5697	2.90222985	3.94E-06	0.34456265	0	4	5	FALSE	RBMX	123.5	4	0	0	0.68296169	TF_other	FALSE	0	RBMX	2574	0.37461774
5713	3.08747856	0	0.32388889	0	1	5	FALSE	NKX2-3	160	1	0	0	0.65208691	TF_other	FALSE	0	NKX2-3	0	0
5715	2.810749	1.72E-05	0.35577705	0.10714286	8	4	FALSE	ELK1	77.25	8	0	0	0.6982085	TF_other	FALSE	0	ELK1	5144	0.18435252
5738	3.03259005	0	0.32975113	1	2	5	FALSE	NAB2	90.5	2	0	0	0.66123499	TF_other	FALSE	0	NAB2	0	0.53235294
5747	3.08747856	0	0.32388889	0	1	5	FALSE	ATF5	160	1	0	0	0.65208691	TF_other	FALSE	0	ATF5	0	0
5753	2.20526015	0.00393723	0.45346124	0.0281583	73	4	FALSE	ELMO1	109.4520548	73	0	0	0.79912331	up	FALSE	0	ELMO1	3897014	0.08358682
5827	3.31275014	1.89E-05	0.301864	0	6	5	FALSE	ELTD1	80.83333333	6	0	0	0.61454164	up	FALSE	0	ELTD1	17504	0.24488753
5834	2.59519726	6.17E-05	0.38532716	0	5	5	FALSE	EMR1	338.6	5	0	0	0.73413379	up	FALSE	0	EMR1	155014	0.36576381
5840	2.79874214	1.09E-05	0.35730337	0	2	5	FALSE	EMR2	471.5	2	0	0	0.70020964	up	FALSE	0	EMR2	31806	0.63581081
5843	4.00285878	0	0.24982145	0	1	6	FALSE	ENAM	20	1	0	0	0.49952354	up	FALSE	0	ENAM	0	0
5845	2.8324757	8.66E-05	0.35304804	0	8	5	FALSE	ENPP5	139.875	8	0	0	0.69458738	down	FALSE	0	ENPP5	77046	0.19368898
5854	2.36077759	7.81E-04	0.42358925	0.06896552	29	5	FALSE	EOMES	137.4137931	29	0	0	0.77320374	up	FALSE	0	EOMES	744178	0.12076561
5862	3.1509434	7.57E-06	0.31736527	0	5	5	FALSE	POU5F1	25.8	5	0	0	0.64150943	TF_other	FALSE	0	POU5F1	3450	0.25050505
5885	2.49342481	2.40E-04	0.4010548	0.04166667	16	5	FALSE	EPDR1	145.1875	16	0	0	0.75109586	up	FALSE	0	EPDR1	276868	0.14587538
5902	2.66895369	1.40E-05	0.37467866	0.1	5	5	FALSE	EPHX3	186	5	0	0	0.72184105	down	FALSE	0	EPHX3	23002	0.269869
5908	2.46655232	0.00167022	0.4054242	0.01008065	32	5	FALSE	ERBB4	99.59375	32	0	0	0.75557461	down	FALSE	0	ERBB4	757804	0.10519835
5930	3.46598056	0	0.28851864	0	1	6	FALSE	WWP1	32	1	0	0	0.58900324	TF_other	FALSE	0	WWP1	0	0
5942	2.50371641	0.00150232	0.39940626	0.03030303	12	5	FALSE	EREG	148	12	0	0	0.7493806	up	FALSE	0	EREG	347436	0.155327
5954	3.50314465	0	0.28545781	0	1	6	FALSE	KDM2A	12	1	0	0	0.58280922	TF_other	FALSE	0	KDM2A	0	0
5956	2.84505432	6.44E-05	0.35148714	0	5	5	FALSE	EVI2B	201.8	5	0	0	0.69249095	up	FALSE	0	EVI2B	65340	0.27927677
5962	2.30474557	0.00160944	0.43388737	0.04354136	53	4	FALSE	EYA1	92.96226415	53	0	0	0.78254241	down	FALSE	0	EYA1	1152924	0.07938433
6049	2.8158948	2.32E-04	0.3551269	0	11	5	FALSE	FABP1	107.3636364	11	0	0	0.69735087	up	FALSE	0	FABP1	132496	0.1461039
6061	2.60834763	0.00146808	0.38338448	0.04329004	22	5	FALSE	FABP4	80.81818182	22	0	0	0.73194206	up	FALSE	0	FABP4	268662	0.10660389
6064	3.60777587	0	0.27717908	0	1	6	FALSE	ASXL1	22	1	0	0	0.56537069	TF_other	FALSE	0	ASXL1	0	0
6085	2.61692396	1.00E-04	0.38212803	0	6	5	FALSE	FAIM3	286.5	6	0	0	0.73051267	up	FALSE	0	FAIM3	182236	0.31304825
6092	2.47913093	8.64E-04	0.40336716	0	36	5	FALSE	FAM110A	103.5277778	36	0	0	0.75347818	up	FALSE	0	FAM110A	845940	0.10041898
6129	2.34762722	4.41E-04	0.42596201	0.04761905	22	4	FALSE	FAM129A	166.7727273	22	0	0	0.77539546	up	FALSE	0	FAM129A	778004	0.14412321
6152	2.68953688	1.04E-04	0.37181122	0.11666667	16	5	FALSE	FAM133A	102.9375	16	0	0	0.71841052	down	FALSE	0	FAM133A	69482	0.1645633
6169	2.8158948	3.82E-05	0.3551269	0	6	5	FALSE	FAM136A	197.1666667	6	0	0	0.69735087	down	FALSE	0	FAM136A	67052	0.27435897
6176	2.67066895	2.77E-04	0.37443802	0	20	5	FALSE	FAM154B	102.8	20	0	0	0.72155517	down	FALSE	0	FAM154B	324704	0.12033097
6197	2.5242996	1.39E-04	0.39614949	0	10	5	FALSE	FAM161A	233.1	10	0	0	0.74595007	down	FALSE	0	FAM161A	299990	0.2311753
6208	2.37907376	9.82E-04	0.42033165	0.01214575	39	5	FALSE	FAM181A	112.8205128	39	0	0	0.77015437	up	FALSE	0	FAM181A	1050228	0.10523655
6248	2.5626072	2.19E-04	0.39022758	0.01428571	21	5	FALSE	FAM20A	111.952381	21	0	0	0.73956547	up	FALSE	0	FAM20A	250656	0.13374592
6270	2.39851344	5.63E-04	0.41692491	0	21	5	FALSE	FAM40B	176	21	0	0	0.76691443	up	FALSE	0	FAM40B	883992	0.15822785
6292	2.33962264	7.14E-04	0.42741935	0.02528736	30	4	FALSE	FAM46C	148.5	30	0	0	0.77672956	up	FALSE	0	FAM46C	1116658	0.12684391
6323	2.41509434	2.76E-04	0.4140625	0.05128205	13	5	FALSE	FAM65B	193	13	0	0	0.76415094	up	FALSE	0	FAM65B	423308	0.18030423
6337	2.64493997	5.20E-05	0.37808042	0	7	5	FALSE	FAM92B	252	7	0	0	0.72584334	up	FALSE	0	FAM92B	125628	0.28490352
6345	2.48027444	4.27E-04	0.40318119	0.02666667	25	4	FALSE	FAP	81.24	25	0	0	0.75328759	up	FALSE	0	FAP	249038	0.08882029
6371	2.44825615	7.04E-04	0.40845399	0.02380952	21	4	FALSE	FBLN5	104.952381	21	0	0	0.75862398	up	FALSE	0	FBLN5	360860	0.10593302
6393	2.28930818	0.00140499	0.43681319	0.04354354	37	4	FALSE	FBXO32	126.7297297	37	0	0	0.7851153	up	FALSE	0	FBXO32	1397256	0.1043556
6431	3.81989708	0	0.26178716	0	1	6	FALSE	FBXW10	91	1	0	0	0.53001715	down	FALSE	0	FBXW10	0	0
6433	2.83361921	1.16E-05	0.35290557	0.06666667	6	5	FALSE	FCAR	104.1666667	6	0	0	0.6943968	up	FALSE	0	FCAR	12556	0.25492611
6440	2.9514008	5.07E-05	0.33882216	0	8	5	FALSE	FCER1G	118.625	8	0	0	0.67476653	up	FALSE	0	FCER1G	49628	0.1970268
6449	2.54431103	1.96E-04	0.39303371	0.03508772	19	4	FALSE	FCGR1A	107.1578947	19	0	0	0.74261483	up	FALSE	0	FCGR1A	216924	0.12568272
6469	2.69239565	1.01E-04	0.37141644	0.03267974	18	4	FALSE	FCGR1B	90.5	18	0	0	0.71793406	up	FALSE	0	FCGR1B	97644	0.14808713
6488	2.70325901	4.91E-05	0.36992386	0	5	5	FALSE	FCGR2A	245.4	5	0	0	0.7161235	up	FALSE	0	FCGR2A	89340	0.29624242
6494	2.93539165	8.09E-05	0.34067004	0	4	5	FALSE	FCGR2B	181.75	4	0	0	0.67743472	up	FALSE	0	FCGR2B	35694	0.30429293
6499	2.46483705	7.17E-04	0.40570633	0	21	5	FALSE	FCGR3A	147.1428571	21	0	0	0.75586049	up	FALSE	0	FCGR3A	657744	0.14038699
6521	3.0217267	6.02E-06	0.33093661	0	3	5	FALSE	FCN1	265.6666667	3	0	0	0.66304555	up	FALSE	0	FCN1	20334	0.48741559
6525	2.65180103	3.16E-05	0.3771022	0	3	5	FALSE	FCN3	452.3333333	3	0	0	0.72469983	up	FALSE	0	FCN3	92224	0.51287879
6529	3.50657519	0	0.28517854	0	1	5	FALSE	FCRL2	203	1	0	0	0.58223747	up	FALSE	0	FCRL2	0	0
6531	2.82218411	2.52E-05	0.35433549	0	6	5	FALSE	FCRL5	213	6	0	0	0.69630265	up	FALSE	0	FCRL5	46878	0.30070922
6538	2.47855918	3.92E-04	0.40346021	0	12	5	FALSE	FERMT3	224.9166667	12	0	0	0.75357347	up	FALSE	0	FERMT3	477914	0.21676347
6551	2.43510577	3.18E-04	0.41065978	0.04678363	19	5	FALSE	FFAR2	136.2631579	19	0	0	0.7608157	up	FALSE	0	FFAR2	374738	0.13514364
6571	2.61806747	1.39E-04	0.38196113	0	8	5	FALSE	FGD2	236	8	0	0	0.73032209	up	FALSE	0	FGD2	180220	0.26315789
6580	2.40080046	0.00193693	0.41652774	0.01339286	64	5	FALSE	FGFR2	83.671875	64	0	0	0.76653326	down	FALSE	0	FGFR2	1651286	0.08043925
6645	2.59405374	3.05E-04	0.38549702	0.03157895	20	5	FALSE	FGL2	93.05	20	0	0	0.73432438	up	FALSE	0	FGL2	153200	0.11876607
6666	2.56432247	2.15E-04	0.38996656	0	15	5	FALSE	FGR	157.0666667	15	0	0	0.73927959	up	FALSE	0	FGR	320644	0.16290884
6682	2.5191538	7.94E-04	0.39695869	0	16	5	FALSE	FHAD1	154.75	16	0	0	0.7468077	up	FALSE	0	FHAD1	495952	0.15498992
6699	2.8324757	1.09E-04	0.35304804	0	10	5	FALSE	FHL5	115.9	10	0	0	0.69458738	up	FALSE	0	FHL5	80390	0.16321023
6710	2.87764437	2.68E-05	0.34750646	0.03571429	8	5	FALSE	FIBIN	86.625	8	0	0	0.68705927	down	FALSE	0	FIBIN	19966	0.19083333
6719	2.54488279	1.16E-04	0.39294541	0	8	5	FALSE	FIGNL1	268.875	8	0	0	0.74251953	down	FALSE	0	FIGNL1	246860	0.27362104
6728	2.34705546	7.26E-04	0.42606577	0.06552707	27	4	FALSE	FILIP1L	121.9259259	27	0	0	0.77549076	up	FALSE	0	FILIP1L	677218	0.10674998
6756	2.92624357	1.20E-05	0.34173505	0	2	5	FALSE	FLJ32255	410.5	2	0	0	0.67895941	up	FALSE	0	FLJ32255	27882	0.64285714
6759	3.18696398	0	0.31377826	0	1	5	FALSE	FLJ37644	414	1	0	0	0.635506	down	FALSE	0	FLJ37644	0	0
6761	2.60720412	3.00E-04	0.38355263	0	23	5	FALSE	FMNL1	127.3043478	23	0	0	0.73213265	up	FALSE	0	FMNL1	431898	0.1391017
6785	3.16352201	8.32E-05	0.31610338	0	5	5	FALSE	FMO3	98.2	5	0	0	0.639413	up	FALSE	0	FMO3	17424	0.24545455
6786	3.11606632	2.87E-05	0.32091743	0	3	5	FALSE	PBX2	40	3	0	0	0.64732228	TF_other	FALSE	0	PBX2	6380	0.34821429
6820	3.04059463	0	0.32888304	0	1	5	FALSE	HMGN1	178	1	0	0	0.6599009	TF_other	FALSE	0	HMGN1	0	0
6827	2.99256718	8.80E-07	0.33416125	0	2	5	FALSE	ELK4	102.5	2	0	0	0.66790547	TF_other	FALSE	0	ELK4	502	0.53141361
6838	3.04059463	0	0.32888304	0	1	5	FALSE	ZBTB7A	178	1	0	0	0.6599009	TF_other	FALSE	0	ZBTB7A	0	0
6841	3.04059463	0	0.32888304	0	1	5	FALSE	NCOA6	178	1	0	0	0.6599009	TF_other	FALSE	0	NCOA6	0	0
6846	3.04059463	0	0.32888304	0	1	5	FALSE	GTF2I	178	1	0	0	0.6599009	TF_other	FALSE	0	GTF2I	0	0
6861	3.04059463	0	0.32888304	0	1	5	FALSE	HOPX	178	1	0	0	0.6599009	TF_other	FALSE	0	HOPX	0	0
6868	3.00114351	1.27E-06	0.33320633	0	2	5	FALSE	KCNIP3	105.5	2	0	0	0.66647608	TF_other	FALSE	0	KCNIP3	180	0.51477833
6877	3.04059463	0	0.32888304	0	1	5	FALSE	ELK3	178	1	0	0	0.6599009	TF_other	FALSE	0	ELK3	0	0
6912	2.57232704	7.53E-05	0.38875306	0	6	5	FALSE	FOXD2	335.5	6	0	0	0.73794549	down	FALSE	0	FOXD2	190376	0.35062893
6919	2.95940537	1.27E-05	0.33790572	0	3	5	FALSE	FPR1	260.6666667	3	0	0	0.67343244	up	FALSE	0	FPR1	28140	0.44539737
6923	2.86792453	1.14E-05	0.34868421	0	2	5	FALSE	FPR2	419.5	2	0	0	0.68867925	up	FALSE	0	FPR2	31166	0.60917031
6926	2.76329331	1.66E-05	0.36188703	0	3	5	FALSE	FPR3	421.6666667	3	0	0	0.70611778	up	FALSE	0	FPR3	52898	0.54420009
6930	2.46655232	3.56E-04	0.4054242	0.00952381	21	5	FALSE	FREM1	115.6666667	21	0	0	0.75557461	down	FALSE	0	FREM1	354334	0.11848248
6952	2.97770154	8.80E-07	0.33582949	0	2	5	FALSE	FTCD	420	2	0	0	0.67038308	down	FALSE	0	FTCD	3794	0.74028269
6955	2.39851344	6.42E-04	0.41692491	0.04411765	17	4	FALSE	FTH1	172.7647059	17	0	0	0.76691443	up	FALSE	0	FTH1	532438	0.15912798
6973	2.60891938	1.07E-04	0.38330046	0	11	5	FALSE	FXYD5	183.4545455	11	0	0	0.73184677	up	FALSE	0	FXYD5	227506	0.19962204
6985	2.48713551	3.67E-04	0.40206897	0	15	5	FALSE	FYB	170.2	15	0	0	0.75214408	up	FALSE	0	FYB	424284	0.16459144
7001	2.62206975	1.84E-04	0.38137811	0	9	5	FALSE	G0S2	175	9	0	0	0.72965504	up	FALSE	0	G0S2	214398	0.19333333
7011	2.72555746	2.10E-05	0.36689742	0	3	5	FALSE	G2E3	375.6666667	3	0	0	0.71240709	down	FALSE	0	G2E3	60580	0.46484698
7015	3.04402516	2.79E-05	0.3285124	0	6	5	FALSE	GABRG1	129.6666667	6	0	0	0.65932914	down	FALSE	0	GABRG1	29672	0.23141487
7022	2.63865066	0.00130158	0.37898158	0	30	5	FALSE	GADD45B	83.23333333	30	0	0	0.72689156	up	FALSE	0	GADD45B	545550	0.09462984
7053	3.50657519	0	0.28517854	0	1	5	FALSE	GAGE2C	203	1	0	0	0.58223747	down	FALSE	0	GAGE2C	0	0
7055	2.52830189	1.21E-04	0.39552239	0	9	5	FALSE	GALNT6	274.7777778	9	0	0	0.74528302	down	FALSE	0	GALNT6	322270	0.27570773
7065	2.514008	2.85E-04	0.39777121	0	16	5	FALSE	GAP43	176.125	16	0	0	0.74766533	down	FALSE	0	GAP43	467724	0.17408052
7082	2.59634077	5.79E-05	0.38515745	0	5	5	FALSE	GAR1	372.4	5	0	0	0.73394321	up	FALSE	0	GAR1	156896	0.39849785
7088	2.55746141	2.54E-04	0.39101274	0.04411765	17	5	FALSE	GAS2L2	142.3529412	17	0	0	0.7404231	down	FALSE	0	GAS2L2	308546	0.15017448
7106	3.3836478	0.00114466	0.29553903	0	3	5	FALSE	GBP1	87	3	0	0	0.60272537	up	FALSE	0	GBP1	670058	0.36134454
7108	4.38307604	0	0.22815027	0	1	6	FALSE	FGF9	3	1	0	0	0.43615399	TF_other	FALSE	0	FGF9	0	0
7111	2.83018868	3.28E-05	0.35333333	0	3	5	FALSE	GBP3	341.3333333	3	0	0	0.69496855	up	FALSE	0	GBP3	65110	0.47268519
7115	2.61578045	8.73E-05	0.38229508	0	6	5	FALSE	GBP5	281	6	0	0	0.73070326	up	FALSE	0	GBP5	176926	0.30837004
7122	2.46826758	3.87E-04	0.40514246	0	20	5	FALSE	GCH1	182.9	20	0	0	0.75528874	up	FALSE	0	GCH1	808862	0.17490385
7143	2.45626072	4.44E-04	0.40712291	0.02769231	26	5	FALSE	GFRA1	118.6923077	26	0	0	0.75728988	down	FALSE	0	GFRA1	545254	0.1166768
7170	2.93596341	8.85E-06	0.3406037	0	2	5	FALSE	GGTLC2	355.5	2	0	0	0.67733943	up	FALSE	0	GGTLC2	18620	0.57455429
7173	2.31675243	7.85E-04	0.4316387	0.06236559	31	4	FALSE	GHR	131.2580645	31	0	0	0.78054126	down	FALSE	0	GHR	924176	0.11104429
7205	2.73070326	2.54E-05	0.36620603	0	4	5	FALSE	GHRHR	288.75	4	0	0	0.71154946	up	FALSE	0	GHRHR	59038	0.35524691
7210	3.02744425	1.14E-05	0.33031161	0	3	5	FALSE	GIMAP4	193	3	0	0	0.66209262	up	FALSE	0	GIMAP4	7720	0.36022514
7214	2.65523156	4.29E-05	0.37661499	0	3	5	FALSE	GIMAP7	446.6666667	3	0	0	0.72412807	up	FALSE	0	GIMAP7	106662	0.51462664
7218	2.53516295	7.88E-05	0.39445196	0	4	5	FALSE	GIMAP8	464.5	4	0	0	0.74413951	up	FALSE	0	GIMAP8	208268	0.47344229
7223	2.5946255	1.48E-04	0.38541208	0	10	5	FALSE	GINS3	179.9	10	0	0	0.73422908	up	FALSE	0	GINS3	214560	0.19195279
7234	2.93367639	1.74E-05	0.34086923	0	4	5	FALSE	GJA4	187.5	4	0	0	0.6777206	up	FALSE	0	GJA4	27676	0.30775578
7239	2.60377358	0.00148485	0.38405797	0	14	5	FALSE	GJA5	133.1428571	14	0	0	0.7327044	up	FALSE	0	GJA5	967884	0.14347759
7244	3.60320183	0	0.27753094	0	1	6	FALSE	TBX5	14	1	0	0	0.56613303	TF_other	FALSE	0	TBX5	0	0
7255	3.50657519	0	0.28517854	0	1	5	FALSE	GJC3	203	1	0	0	0.58223747	up	FALSE	0	GJC3	0	0
7257	2.35277301	9.73E-04	0.42503038	0.01935484	31	5	FALSE	GK	143	31	0	0	0.77453783	up	FALSE	0	GK	1061132	0.12631308
7289	2.62607204	1.05E-04	0.38079686	0	7	5	FALSE	GLIPR1	218.1428571	7	0	0	0.72898799	up	FALSE	0	GLIPR1	182448	0.24207676
7297	2.92281304	8.19E-06	0.34213615	0	3	5	FALSE	GLIPR1L2	248.6666667	3	0	0	0.67953116	down	FALSE	0	GLIPR1L2	15242	0.39064143
7301	2.41738136	2.10E-04	0.41367077	0.09090909	11	5	FALSE	GLRX	251.8181818	11	0	0	0.76376977	up	FALSE	0	GLRX	451254	0.2323139
7313	2.95997713	5.77E-06	0.33784045	0	3	5	FALSE	GLUD2	295.3333333	3	0	0	0.67333715	down	FALSE	0	GLUD2	8274	0.50572738
7317	2.82275586	3.63E-05	0.35426372	0	8	5	FALSE	GMIP	169.5	8	0	0	0.69620736	up	FALSE	0	GMIP	65038	0.23699015
7326	2.5511721	9.09E-05	0.39197669	0	7	5	FALSE	GNLY	276.4285714	7	0	0	0.74147132	up	FALSE	0	GNLY	210048	0.28278087
7334	2.56946827	1.18E-04	0.38918558	0	7	5	FALSE	GPCPD1	295	7	0	0	0.73842196	up	FALSE	0	GPCPD1	240970	0.31144068
7342	3.14979989	4.19E-05	0.31748049	0	9	5	FALSE	GPNMB	82.22222222	9	0	0	0.64170002	up	FALSE	0	GPNMB	34574	0.20204533
7352	2.85020011	5.56E-05	0.35085256	0	9	5	FALSE	GPR116	146.5555556	9	0	0	0.69163331	up	FALSE	0	GPR116	91564	0.20500782
7362	2.63464837	3.08E-05	0.37955729	0	4	5	FALSE	GPR171	261	4	0	0	0.7275586	up	FALSE	0	GPR171	38328	0.34993271
7367	2.59176672	1.79E-04	0.38583719	0	14	5	FALSE	GPR174	108.7857143	14	0	0	0.73470555	up	FALSE	0	GPR174	132142	0.13241488
7382	2.4436821	1.63E-04	0.40921853	0.05454545	11	5	FALSE	GPR183	192.4545455	11	0	0	0.75938632	up	FALSE	0	GPR183	255688	0.1907645
7394	2.57404231	2.15E-04	0.388494	0	12	5	FALSE	GPR37	153	12	0	0	0.73765962	down	FALSE	0	GPR37	285814	0.1627409
7407	2.31732419	5.72E-04	0.4315322	0.09486166	23	4	FALSE	GPR39	144.2608696	23	0	0	0.78044597	up	FALSE	0	GPR39	472072	0.12179063
7431	3.54659806	0	0.28196034	0	1	5	FALSE	GPR4	144	1	0	0	0.57556699	up	FALSE	0	GPR4	0	0
7433	3.02401372	1.81E-05	0.33068633	0	3	5	FALSE	GPR64	217.3333333	3	0	0	0.66266438	down	FALSE	0	GPR64	23146	0.39549055
7437	2.65523156	4.29E-05	0.37661499	0	3	5	FALSE	GPR65	446.6666667	3	0	0	0.72412807	up	FALSE	0	GPR65	106662	0.51462664
7441	3.21955403	0	0.31060202	0	1	5	FALSE	GPR78	425	1	0	0	0.63007433	down	FALSE	0	GPR78	0	0
7443	2.34419668	2.56E-04	0.42658537	0.11428571	15	5	FALSE	GPR84	226.9333333	15	0	0	0.77596722	up	FALSE	0	GPR84	565904	0.18994132
7459	2.63750715	4.28E-05	0.37914589	0	6	5	FALSE	GPR97	221.6666667	6	0	0	0.72708214	up	FALSE	0	GPR97	62172	0.26269841
7466	2.80960549	4.20E-05	0.35592186	0	6	5	FALSE	GREB1L	194.1666667	6	0	0	0.69839909	down	FALSE	0	GREB1L	79088	0.2620986
7473	2.38593482	6.49E-04	0.41912293	0.01935484	31	4	FALSE	GREM1	117.0967742	31	0	0	0.76901086	up	FALSE	0	GREM1	763460	0.10962274
7505	2.49971412	4.43E-04	0.40004575	0	19	5	FALSE	GRIA1	154.6842105	19	0	0	0.75004765	down	FALSE	0	GRIA1	538366	0.15156234
7525	2.41623785	6.44E-04	0.41386654	0.06306306	37	4	FALSE	GRIK3	109.7567568	37	0	0	0.76396036	up	FALSE	0	GRIK3	724652	0.10824164
7563	2.32418525	4.70E-04	0.4302583	0.10591133	29	4	FALSE	GRM7	129.6896552	29	0	0	0.77930246	down	FALSE	0	GRM7	542826	0.11079319
7593	2.48827902	1.42E-04	0.40188419	0	10	5	FALSE	GRPR	265.1	10	0	0	0.7519535	down	FALSE	0	GRPR	368390	0.25467695
7604	2.38936535	0.00351797	0.41852118	0.02570922	48	4	FALSE	GSC	92.89583333	48	0	0	0.76843911	down	FALSE	0	GSC	1336984	0.08972492
7605	3.3887936	0	0.29509026	0	1	5	FALSE	HHEX	48	1	0	0	0.60186773	TF_other	FALSE	0	HHEX	0	0
7643	3.3887936	0	0.29509026	0	1	5	FALSE	EVX1	48	1	0	0	0.60186773	TF_other	FALSE	0	EVX1	0	0
7655	3.9079474	6.75E-06	0.25588881	0	2	6	FALSE	GSTA1	22.5	2	0	0	0.5153421	down	FALSE	0	GSTA1	974	0.5
7658	3.13321898	3.90E-05	0.31916058	0	5	5	FALSE	GVINP1	117	5	0	0	0.6444635	up	FALSE	0	GVINP1	24028	0.23577236
7664	2.69296741	8.77E-05	0.37133758	0	9	5	FALSE	GZMA	182.5555556	9	0	0	0.71783877	up	FALSE	0	GZMA	163874	0.21639518
7674	2.47741567	5.52E-04	0.40364643	0.02857143	15	5	FALSE	GZMB	169.5333333	15	0	0	0.75376406	up	FALSE	0	GZMB	383116	0.16309179
7690	2.48427673	2.31E-04	0.40253165	0.03636364	11	4	FALSE	GZMK	163.1818182	11	0	0	0.75262055	up	FALSE	0	GZMK	174082	0.16747891
7702	2.52544311	1.23E-04	0.39597012	0.08974359	13	5	FALSE	H2AFY	152.4615385	13	0	0	0.74575948	up	FALSE	0	H2AFY	160860	0.15726673
7716	2.86849628	2.56E-04	0.34861471	0	15	5	FALSE	HAMP	103.2	15	0	0	0.68858395	up	FALSE	0	HAMP	150804	0.15253731
7732	2.47855918	4.64E-04	0.40346021	0.03463203	22	5	FALSE	HAPLN1	87.90909091	22	0	0	0.75357347	down	FALSE	0	HAPLN1	333120	0.09480802
7755	3.04173814	9.97E-06	0.3287594	0	5	5	FALSE	HAPLN3	53	5	0	0	0.65971031	up	FALSE	0	HAPLN3	3754	0.22907489
7761	2.90222985	1.62E-04	0.34456265	0	13	5	FALSE	HAS2	79.46153846	13	0	0	0.68296169	up	FALSE	0	HAS2	95444	0.12513802
7775	2.64951401	0.00130229	0.37742771	0.05263158	19	5	FALSE	HBA2	81.36842105	19	0	0	0.725081	up	FALSE	0	HBA2	254804	0.11622807
7793	3.64894225	0	0.27405202	0	1	6	FALSE	ATRX	19	1	0	0	0.55850962	TF_other	FALSE	0	ATRX	0	0
7796	2.72955975	4.15E-04	0.36635945	0	6	5	FALSE	HBD	231.3333333	6	0	0	0.71174004	up	FALSE	0	HBD	107418	0.28577337
7799	3.25214408	3.36E-06	0.30748945	0	2	5	FALSE	ELF4	33.5	2	0	0	0.62464265	TF_other	FALSE	0	ELF4	980	0.5078125
7804	3.01315037	0.00343254	0.33187856	0	5	5	FALSE	HBG2	112	5	0	0	0.66447494	up	FALSE	0	HBG2	1805144	0.20747664
7806	4.01257862	0	0.2492163	0	1	6	FALSE	KLF11	5	1	0	0	0.49790356	TF_other	FALSE	0	KLF11	0	0
7808	4.01257862	0	0.2492163	0	1	6	FALSE	CSDA	5	1	0	0	0.49790356	TF_other	FALSE	0	CSDA	0	0
7810	4.01257862	0	0.2492163	0	1	6	FALSE	KLF1	5	1	0	0	0.49790356	TF_other	FALSE	0	KLF1	0	0
7813	3.65866209	8.20E-07	0.27332396	0	2	6	FALSE	HBM	56.5	2	0	0	0.55688965	up	FALSE	0	HBM	596	0.53883495
7816	2.72212693	2.69E-05	0.3673598	0	4	5	FALSE	HBQ1	288.25	4	0	0	0.71297885	up	FALSE	0	HBQ1	62648	0.35375616
7821	2.53802173	1.54E-04	0.39400766	0.00735294	17	5	FALSE	HCAR2	113.5882353	17	0	0	0.74366305	up	FALSE	0	HCAR2	187162	0.13465458
7839	2.45054317	3.62E-04	0.4080728	0.01578947	20	4	FALSE	HCAR3	122.8	20	0	0	0.75824281	up	FALSE	0	HCAR3	384058	0.12036489
7860	2.72784448	3.73E-04	0.36658981	0	18	5	FALSE	HCK	107.3333333	18	0	0	0.71202592	up	FALSE	0	HCK	240080	0.13341698
7879	2.59348199	1.12E-04	0.38558201	0	7	5	FALSE	HCLS1	238.1428571	7	0	0	0.73441967	up	FALSE	0	HCLS1	196472	0.25692617
7887	3.00800457	4.41E-06	0.3324463	0	2	5	FALSE	HCST	298.5	2	0	0	0.66533257	up	FALSE	0	HCST	6024	0.54587156
7890	2.53173242	7.37E-05	0.39498645	0.08333333	9	5	FALSE	HEMGN	214.7777778	9	0	0	0.74471126	up	FALSE	0	HEMGN	135008	0.23386705
7905	3.12064037	0	0.32044705	0	1	5	FALSE	HIPK2	102	1	0	0	0.64655994	TF_other	FALSE	0	HIPK2	0	0
7911	3.12064037	0	0.32044705	0	1	5	FALSE	LIMD1	102	1	0	0	0.64655994	TF_other	FALSE	0	LIMD1	0	0
7923	3.12064037	0	0.32044705	0	1	5	FALSE	HSF4	102	1	0	0	0.64655994	TF_other	FALSE	0	HSF4	0	0
7925	3.05717553	2.45E-06	0.32709931	0	2	5	FALSE	CITED2	71	2	0	0	0.65713741	TF_other	FALSE	0	CITED2	230	0.52631579
7932	3.06232133	0	0.32654966	1	2	5	FALSE	HDAC7	70.5	2	0	0	0.65627978	TF_other	FALSE	0	HDAC7	0	0.53816794
7939	3.12064037	0	0.32044705	0	1	5	FALSE	HIF3A	102	1	0	0	0.64655994	TF_other	FALSE	0	HIF3A	0	0
7944	2.324757	8.09E-04	0.43015248	0.08187135	19	4	FALSE	ZFP36	167.7894737	19	0	0	0.77920717	TF_up	FALSE	0	ZFP36	602254	0.14219917
7955	2.56089194	0.00120996	0.39048895	0	5	5	FALSE	HIST1H2AE	369.6	5	0	0	0.73985134	up	FALSE	0	HIST1H2AE	637056	0.38516196
7959	3.56032018	0	0.28087361	0	1	6	FALSE	RBL1	5	1	0	0	0.57327997	TF_other	FALSE	0	RBL1	0	0
7962	2.41109205	3.26E-04	0.41474982	0.07619048	15	5	FALSE	HIST1H3B	219.6	15	0	0	0.76481799	up	FALSE	0	HIST1H3B	652486	0.20036563
7978	2.82275586	2.71E-05	0.35426372	0	3	5	FALSE	HIST1H3D	335.3333333	3	0	0	0.69620736	up	FALSE	0	HIST1H3D	44344	0.47155618
7982	2.87021155	1.06E-05	0.34840637	0	2	5	FALSE	HIST1H3G	457.5	2	0	0	0.68829808	up	FALSE	0	HIST1H3G	26996	0.67931548
7985	2.84676958	9.50E-05	0.35127536	0	11	5	FALSE	HIST1H3I	143	11	0	0	0.69220507	up	FALSE	0	HIST1H3I	139110	0.20669578
7997	2.42938822	5.69E-04	0.41162627	0	20	5	FALSE	HIST1H4C	173.9	20	0	0	0.76176863	up	FALSE	0	HIST1H4C	776978	0.16053853
8018	2.567753	1.68E-04	0.38944556	0	8	5	FALSE	HIST1H4D	264.875	8	0	0	0.73870783	down	FALSE	0	HIST1H4D	233414	0.27864308
8027	3.23956547	0	0.30868337	0	1	5	FALSE	HIST1H4G	407	1	0	0	0.62673909	up	FALSE	0	HIST1H4G	0	0
8029	2.5780446	0.00144698	0.38789088	0	15	5	FALSE	HIST2H4A	141.5333333	15	0	0	0.73699257	up	FALSE	0	HIST2H4A	1187626	0.14950355
8039	3.57747284	0	0.27952693	0	1	6	FALSE	TMF1	15	1	0	0	0.57042119	TF_other	FALSE	0	TMF1	0	0
8046	2.60034305	0.00132327	0.38456464	0.03896104	22	5	FALSE	HLA-B	96.77272727	22	0	0	0.73327616	up	FALSE	0	HLA-B	279752	0.12734488
8052	3.5997713	0	0.27779543	0	1	6	FALSE	HIVEP2	22	1	0	0	0.56670478	TF_other	FALSE	0	HIVEP2	0	0
8070	2.88793596	1.67E-04	0.34626807	0	6	5	FALSE	HLA-DMA	89.66666667	6	0	0	0.68534401	up	FALSE	0	HLA-DMA	29000	0.18785311
8071	3.2327044	4.24E-05	0.30933852	0	12	5	FALSE	RFXANK	9	12	0	0	0.6278826	TF_other	FALSE	0	RFXANK	19036	0.17777778
8074	3.2327044	4.24E-05	0.30933852	0	12	5	FALSE	RFX5	9	12	0	0	0.6278826	TF_other	FALSE	0	RFX5	19036	0.17777778
8078	3.2327044	4.24E-05	0.30933852	0	12	5	FALSE	RFXAP	9	12	0	0	0.6278826	TF_other	FALSE	0	RFXAP	19036	0.17777778
8080	2.68096055	3.57E-04	0.37300064	0.02222222	10	5	FALSE	HLA-DMB	90.9	10	0	0	0.71983991	up	FALSE	0	HLA-DMB	78500	0.14370016
8091	2.71755289	5.13E-04	0.36797812	0.03571429	8	5	FALSE	HLA-DOA	111.125	8	0	0	0.71374119	up	FALSE	0	HLA-DOA	77088	0.16136696
8100	2.58662093	6.61E-04	0.38660477	0.05128205	13	5	FALSE	HLA-DOB	101.0769231	13	0	0	0.73556318	up	FALSE	0	HLA-DOB	165384	0.12157009
8114	2.7455689	3.24E-04	0.36422324	0.13888889	9	5	FALSE	HLA-DPB1	79.22222222	9	0	0	0.70907185	up	FALSE	0	HLA-DPB1	46592	0.15529309
8124	3.40251572	1.99E-04	0.29390018	0	7	5	FALSE	HLA-DQA1	61.71428571	7	0	0	0.59958071	up	FALSE	0	HLA-DQA1	25822	0.29616725
8132	3.13321898	5.13E-05	0.31916058	0	5	5	FALSE	HLA-DQA2	31.6	5	0	0	0.6444635	up	FALSE	0	HLA-DQA2	7276	0.35581395
8138	2.58033162	0.00132006	0.38754709	0.07272727	11	4	FALSE	HLA-DQB1	105.3636364	11	0	0	0.7366114	up	FALSE	0	HLA-DQB1	194046	0.12751604
8147	3.40137221	6.20E-07	0.29399899	0	2	5	FALSE	RFX3	16	2	0	0	0.5997713	TF_other	FALSE	0	RFX3	68	0.68181818
8150	2.39622642	5.22E-04	0.41732283	0.11111111	10	4	FALSE	RFX2	264.4	10	0	0	0.7672956	TF_up	FALSE	0	RFX2	331180	0.24162855
8152	3.21040595	1.21E-04	0.31148709	0	4	5	FALSE	HLA-DQB2	115.25	4	0	0	0.63159901	up	FALSE	0	HLA-DQB2	20910	0.26569767
8157	2.51343625	0.00400951	0.39786169	0.05714286	21	4	FALSE	HLA-DRA	69	21	0	0	0.74776063	up	FALSE	0	HLA-DRA	296404	0.07958631
8166	3.51286449	0	0.28466797	0	1	5	FALSE	NCOA1	21	1	0	0	0.58118925	TF_other	FALSE	0	NCOA1	0	0
8177	3.51286449	0	0.28466797	0	1	5	FALSE	RFX4	21	1	0	0	0.58118925	TF_other	FALSE	0	RFX4	0	0
8181	3.10634648	1.38E-04	0.32192159	0	7	5	FALSE	HLA-DRB3	50.71428571	7	0	0	0.64894225	up	FALSE	0	HLA-DRB3	23662	0.22909809
8189	3.07146941	1.43E-04	0.32557707	0	7	5	FALSE	HLA-DRB4	45.42857143	7	0	0	0.6547551	up	FALSE	0	HLA-DRB4	21260	0.17771429
8202	3.3733562	0	0.29644068	0	1	5	FALSE	TEF	36	1	0	0	0.60444063	TF_other	FALSE	0	TEF	0	0
8204	2.31275014	0.00412932	0.43238566	0.04032258	32	4	FALSE	HMOX1	113.46875	32	0	0	0.78120831	up	FALSE	0	HMOX1	1175568	0.09581743
8209	3.27501429	1.18E-06	0.30534218	0	2	5	FALSE	MTF1	21	2	0	0	0.62083095	TF_other	FALSE	0	MTF1	186	0.57142857
8212	3.31217839	0	0.30191611	0	1	5	FALSE	PRDM2	32	1	0	0	0.61463694	TF_other	FALSE	0	PRDM2	0	0
8237	3.25557461	6.90E-07	0.30716544	0	2	5	FALSE	SMAD7	33	2	0	0	0.6240709	TF_other	FALSE	0	SMAD7	528	0.55172414
8240	2.53401944	2.52E-04	0.39462996	0.0047619	21	5	FALSE	HOOK1	104	21	0	0	0.74433009	up	FALSE	0	HOOK1	247304	0.11987818
8262	2.4373928	0.00321513	0.41027445	0	30	5	FALSE	HOXB2	125.3333333	30	0	0	0.76043453	up	FALSE	0	HOXB2	2348804	0.11619938
8270	3.43682104	0	0.29096656	0	1	6	FALSE	HOXA1	30	1	0	0	0.59386316	TF_other	FALSE	0	HOXA1	0	0
8282	3.43682104	0	0.29096656	0	1	6	FALSE	HOXB1	30	1	0	0	0.59386316	TF_other	FALSE	0	HOXB1	0	0
8295	2.40423099	0.00101957	0.41593341	0.0326087	24	4	FALSE	HPGD	138.4583333	24	0	0	0.7659615	up	FALSE	0	HPGD	644632	0.12926048
8320	2.85706118	3.80E-05	0.35001001	0	4	5	FALSE	HPGDS	247.25	4	0	0	0.6904898	down	FALSE	0	HPGDS	54570	0.34879603
8325	2.86163522	1.72E-05	0.34945055	0	4	5	FALSE	HPR	271.75	4	0	0	0.68972746	up	FALSE	0	HPR	29748	0.40714286
8330	2.46140652	0.00326809	0.40627178	0.03557312	23	5	FALSE	HPSE	117.8695652	23	0	0	0.75643225	up	FALSE	0	HPSE	996490	0.11477921
8337	3.46083476	0	0.28894763	0	1	6	FALSE	POU4F1	23	1	0	0	0.58986087	TF_other	FALSE	0	POU4F1	0	0
8339	3.28416238	2.35E-06	0.30449164	0	2	5	FALSE	GABPA	18	2	0	0	0.61930627	TF_other	FALSE	0	GABPA	440	0.51515152
8347	3.46083476	0	0.28894763	0	1	6	FALSE	GABPB1	23	1	0	0	0.58986087	TF_other	FALSE	0	GABPB1	0	0
8357	3.12064037	3.09E-06	0.32044705	0	2	5	FALSE	HRASLS	67	2	0	0	0.64655994	up	FALSE	0	HRASLS	200	0.51162791
8360	2.76272156	2.27E-05	0.36196192	0	4	5	FALSE	HRASLS5	330	4	0	0	0.70621307	down	FALSE	0	HRASLS5	61018	0.42671855
8365	2.40823328	6.48E-04	0.41524217	0.01247772	34	4	FALSE	HS3ST2	122	34	0	0	0.76529445	up	FALSE	0	HS3ST2	931508	0.11932608
8400	2.61806747	6.52E-05	0.38196113	0	6	5	FALSE	HSH2D	253.8333333	6	0	0	0.73032209	up	FALSE	0	HSH2D	135002	0.27783883
8407	2.94168096	3.29E-06	0.33994169	0	2	5	FALSE	HTR1F	341.5	2	0	0	0.67638651	down	FALSE	0	HTR1F	9886	0.56561462
8410	2.4488279	5.53E-04	0.40835863	0	20	5	FALSE	HTRA4	163.8	20	0	0	0.75852868	up	FALSE	0	HTRA4	678894	0.1543128
8431	2.70554603	0.00175828	0.36961116	0.08888889	10	5	FALSE	IBSP	93.7	10	0	0	0.71574233	up	FALSE	0	IBSP	212010	0.14272588
8433	3.70497427	0	0.26990741	0	1	6	FALSE	DLX5	10	1	0	0	0.54917095	TF_other	FALSE	0	DLX5	0	0
8443	2.39108062	0.00637631	0.41822095	0.02948718	40	4	FALSE	ICAM1	86.325	40	0	0	0.76815323	up	FALSE	0	ICAM1	1263726	0.08171429
8445	3.39050886	0	0.29494098	0	1	5	FALSE	ETV5	40	1	0	0	0.60158186	TF_other	FALSE	0	ETV5	0	0
8447	3.39050886	0	0.29494098	0	1	5	FALSE	GHRH	40	1	0	0	0.60158186	TF_other	FALSE	0	GHRH	0	0
8454	2.47169811	6.53E-04	0.40458015	0.05128205	13	5	FALSE	IFI16	179.0769231	13	0	0	0.75471698	TF_up	FALSE	0	IFI16	381252	0.17360072
8481	3.39050886	0	0.29494098	0	1	5	FALSE	FEV	40	1	0	0	0.60158186	TF_other	FALSE	0	FEV	0	0
8488	2.4974271	1.83E-04	0.40041209	0.09090909	11	5	FALSE	ICAM2	198.0909091	11	0	0	0.75042882	up	FALSE	0	ICAM2	219882	0.20803828
8500	2.87021155	1.06E-05	0.34840637	0	2	5	FALSE	ICOS	457.5	2	0	0	0.68829808	up	FALSE	0	ICOS	26996	0.67931548
8503	3.34534019	0.001155	0.29892326	0	5	5	FALSE	IDO1	59.6	5	0	0	0.60910997	up	FALSE	0	IDO1	738222	0.21623616
8506	4.34476844	0	0.23016186	0	1	6	FALSE	PTMA	5	1	0	0	0.44253859	TF_other	FALSE	0	PTMA	0	0
8522	2.94225272	1.14E-05	0.33987563	0	3	5	FALSE	IFI30	231.6666667	3	0	0	0.67629121	up	FALSE	0	IFI30	12116	0.38573021
8526	2.47684391	0.00346127	0.40373961	0.01505376	31	5	FALSE	IGFBP1	99.25806452	31	0	0	0.75385935	up	FALSE	0	IGFBP1	1730098	0.09536895
8531	3.35791881	1.50E-06	0.29780351	0	2	6	FALSE	HOXA10	23	2	0	0	0.60701353	TF_other	FALSE	0	HOXA10	1158	0.51162791
8554	3.2595769	2.19E-05	0.30678828	0	4	5	FALSE	FOXA2	16.75	4	0	0	0.62340385	TF_other	FALSE	0	FOXA2	7412	0.28125
8559	3.47627216	0	0.28766447	0	1	6	FALSE	WWTR1	31	1	0	0	0.58728797	TF_other	FALSE	0	WWTR1	0	0
8561	2.57004002	3.25E-04	0.389099	0.0047619	21	5	FALSE	IGFBP4	117.1904762	21	0	0	0.73832666	up	FALSE	0	IGFBP4	310320	0.13350828
8583	3.61463694	0	0.27665296	0	1	5	FALSE	IGFL1	117	1	0	0	0.56422718	down	FALSE	0	IGFL1	0	0
8585	2.69811321	3.91E-05	0.37062937	0	4	5	FALSE	IGFLR1	306.25	4	0	0	0.71698113	up	FALSE	0	IGFLR1	65036	0.37
8590	3.02801601	1.06E-05	0.33024924	0	3	5	FALSE	IGHA1	205	3	0	0	0.66199733	up	FALSE	0	IGHA1	14880	0.37918216
8594	3.23956547	0	0.30868337	0	1	5	FALSE	IGHD	407	1	0	0	0.62673909	up	FALSE	0	IGHD	0	0
8596	3.08576329	6.25E-06	0.32406893	0	2	5	FALSE	IGHG1	274	2	0	0	0.65237278	up	FALSE	0	IGHG1	11054	0.54059406
8599	2.63979417	3.67E-05	0.37881741	0	4	5	FALSE	IGHG3	277.75	4	0	0	0.72670097	up	FALSE	0	IGHG3	50498	0.35571979
8604	3.23956547	0	0.30868337	0	1	5	FALSE	IGHJ1	407	1	0	0	0.62673909	up	FALSE	0	IGHJ1	0	0
8606	3.23956547	0	0.30868337	0	1	5	FALSE	IGHM	407	1	0	0	0.62673909	up	FALSE	0	IGHM	0	0
8608	3.23956547	0	0.30868337	0	1	5	FALSE	IGHV1-3	407	1	0	0	0.62673909	up	FALSE	0	IGHV1-3	0	0
8610	2.6380789	1.04E-04	0.37906372	0.07272727	11	5	FALSE	IGJ	95.72727273	11	0	0	0.72698685	up	FALSE	0	IGJ	28958	0.13056491
8622	3.18696398	0	0.31377826	0	1	5	FALSE	IGLC2	414	1	0	0	0.635506	up	FALSE	0	IGLC2	0	0
8624	3.23956547	0	0.30868337	0	1	5	FALSE	IGLV1-44	407	1	0	0	0.62673909	up	FALSE	0	IGLV1-44	0	0
8626	3.23956547	0	0.30868337	0	1	5	FALSE	IGLV3-1	407	1	0	0	0.62673909	up	FALSE	0	IGLV3-1	0	0
8628	3.23956547	0	0.30868337	0	1	5	FALSE	IGLV3-19	407	1	0	0	0.62673909	up	FALSE	0	IGLV3-19	0	0
8630	2.92624357	1.20E-05	0.34173505	0	2	5	FALSE	IGLV3-21	410.5	2	0	0	0.67895941	up	FALSE	0	IGLV3-21	27882	0.64285714
8633	3.23956547	0	0.30868337	0	1	5	FALSE	IGLV3-25	407	1	0	0	0.62673909	up	FALSE	0	IGLV3-25	0	0
8635	2.75071469	5.08E-05	0.36354188	0	4	5	FALSE	IGSF6	297.75	4	0	0	0.70821422	up	FALSE	0	IGSF6	84680	0.37996159
8640	2.54488279	6.73E-05	0.39294541	0.07142857	8	5	FALSE	IK	207.375	8	0	0	0.74251953	down	FALSE	0	IK	102404	0.23682703
8686	2.44711264	2.23E-04	0.40864486	0.02564103	13	4	FALSE	IKZF3	175.3846154	13	0	0	0.75881456	up	FALSE	0	IKZF3	339406	0.17549285
8700	2.7621498	2.62E-05	0.36203685	0	3	5	FALSE	IL10RA	415.6666667	3	0	0	0.70630837	up	FALSE	0	IL10RA	70608	0.5413403
8704	2.45454545	2.30E-04	0.40740741	0.0942029	24	4	FALSE	IL13RA1	114.5416667	24	0	0	0.75757576	up	FALSE	0	IL13RA1	245298	0.11830743
8729	2.33562035	8.32E-04	0.42815177	0.01424501	27	5	FALSE	IL16	152	27	0	0	0.77739661	up	FALSE	0	IL16	1128566	0.13070201
8757	2.74328188	1.28E-04	0.36452689	0	7	5	FALSE	IL18	159.8571429	7	0	0	0.70945302	up	FALSE	0	IL18	61236	0.2443956
8765	2.50028588	2.35E-04	0.39995426	0.00833333	16	4	FALSE	IL18RAP	138.375	16	0	0	0.74995235	up	FALSE	0	IL18RAP	284912	0.14643237
8782	2.47970269	1.73E-04	0.40327415	0.11764706	17	5	FALSE	IL1A	144.5294118	17	0	0	0.75338289	up	FALSE	0	IL1A	186780	0.14860362
8800	2.34762722	0.00250159	0.42596201	0.04166667	33	4	FALSE	IL1B	105.9393939	33	0	0	0.77539546	up	FALSE	0	IL1B	906306	0.09274806
8832	3.34705546	0	0.29877007	0	1	5	FALSE	SUGP1	33	1	0	0	0.60882409	TF_other	FALSE	0	SUGP1	0	0
8835	2.70783305	4.15E-04	0.36929899	0	14	5	FALSE	IL1R2	97.57142857	14	0	0	0.71536116	up	FALSE	0	IL1R2	162586	0.11820248
8850	2.48141795	4.40E-04	0.40299539	0.01086957	24	5	FALSE	IL1RN	111	24	0	0	0.75309701	up	FALSE	0	IL1RN	403766	0.10929233
8875	2.66437965	2.74E-04	0.37532189	0	15	5	FALSE	IL2RG	112	15	0	0	0.72260339	up	FALSE	0	IL2RG	202974	0.12729358
8891	2.56146369	2.61E-04	0.39040179	0	8	5	FALSE	IL32	223.25	8	0	0	0.73975605	up	FALSE	0	IL32	258008	0.23272251
8900	2.97770154	8.80E-07	0.33582949	0	2	5	FALSE	IL36B	420	2	0	0	0.67038308	up	FALSE	0	IL36B	3794	0.74028269
8903	2.72327044	4.84E-05	0.36720554	0.1	5	5	FALSE	IL3RA	182	5	0	0	0.71278826	up	FALSE	0	IL3RA	28588	0.26328012
8909	2.21269297	0.00852506	0.45193798	0.04699248	57	4	FALSE	IL6	107.8596491	57	0	0	0.79788451	up	FALSE	0	IL6	2496022	0.08205437
8910	3.21212121	0	0.31132075	0	1	5	FALSE	ZNF300	57	1	0	0	0.63131313	TF_other	FALSE	0	ZNF300	0	0
8919	3.21212121	0	0.31132075	0	1	5	FALSE	OTX2	57	1	0	0	0.63131313	TF_other	FALSE	0	OTX2	0	0
8943	3.21212121	0	0.31132075	0	1	5	FALSE	ZMYND11	57	1	0	0	0.63131313	TF_other	FALSE	0	ZMYND11	0	0
8962	3.08004574	1.73E-06	0.3246705	0	2	5	FALSE	JUND1	79.5	2	0	0	0.65332571	TF_other	FALSE	0	JUND1	218	0.5528169
8966	3.21212121	0	0.31132075	0	1	5	FALSE	GBX2	57	1	0	0	0.63131313	TF_other	FALSE	0	GBX2	0	0
8972	2.41337907	3.96E-04	0.41435679	0.01754386	19	5	FALSE	IL6R	167.7894737	19	0	0	0.76443682	up	FALSE	0	IL6R	591734	0.15520446
8992	2.46026301	3.81E-04	0.40646061	0	17	5	FALSE	IL7R	135.7647059	17	0	0	0.75662283	up	FALSE	0	IL7R	334494	0.13640152
9010	2.32590051	0.00204918	0.429941	0.03333333	21	4	FALSE	IL8	156.0476191	21	0	0	0.77901658	up	FALSE	0	IL8	808156	0.13273149
9015	3.32532876	0	0.30072215	0	1	5	FALSE	IRF9	21	1	0	0	0.61244521	TF_other	FALSE	0	IRF9	0	0
9033	2.46140652	5.33E-04	0.40627178	0.01424501	27	4	FALSE	INHBA	87.55555556	27	0	0	0.75643225	up	FALSE	0	INHBA	368178	0.09281046
9061	2.40194397	4.89E-04	0.41632945	0	20	5	FALSE	INPP5D	197.35	20	0	0	0.76634267	up	FALSE	0	INPP5D	1022810	0.17753165
9105	2.60148656	2.72E-04	0.3843956	0.04545455	12	5	FALSE	ITGA11	123.5833333	12	0	0	0.73308557	up	FALSE	0	ITGA11	120094	0.15598562
9118	2.42995998	2.73E-04	0.41152941	0.09166667	16	4	FALSE	ITGA2	152.3125	16	0	0	0.76167334	down	FALSE	0	ITGA2	310380	0.14478074
9135	2.4757004	0.0012106	0.4039261	0.16363636	11	5	FALSE	ITGA8	194.1818182	11	0	0	0.75404993	down	FALSE	0	ITGA8	221472	0.19960678
9138	3.47512864	0	0.28775913	0	1	6	FALSE	HOXA11	11	1	0	0	0.58747856	TF_other	FALSE	0	HOXA11	0	0
9148	2.77587193	5.03E-05	0.36024717	0	8	5	FALSE	ITGAL	170.75	8	0	0	0.70402135	up	FALSE	0	ITGAL	98262	0.22016861
9157	2.62778731	4.30E-04	0.3805483	0.0952381	7	5	FALSE	ITGAM	181	7	0	0	0.72870212	up	FALSE	0	ITGAM	104668	0.21102757
9165	2.42081189	2.86E-04	0.41308455	0.13333333	15	4	FALSE	ITGAX	155.2	15	0	0	0.76319802	up	FALSE	0	ITGAX	205198	0.1494852
9181	2.48427673	0.00184843	0.40253165	0.06410256	13	5	FALSE	ITGB2	132.2307692	13	0	0	0.75262055	up	FALSE	0	ITGB2	270054	0.13675214
9192	3.48370497	0	0.28705071	0	1	6	FALSE	MS	13	1	0	0	0.58604917	TF_other	FALSE	0	MS	0	0
9196	2.83933676	3.67E-05	0.35219493	0	5	5	FALSE	ITLN1	191.6	5	0	0	0.69344387	up	FALSE	0	ITLN1	58540	0.2730659
9202	2.54774157	1.79E-04	0.39250449	0.05228758	18	4	FALSE	ITPR3	113.0555556	18	0	0	0.74204307	up	FALSE	0	ITPR3	148136	0.13514957
9221	2.43682104	3.17E-04	0.41037072	0.00952381	15	5	FALSE	JAK2	162.8666667	15	0	0	0.76052983	up	FALSE	0	JAK2	372066	0.15652174
9247	3.12064037	0	0.32044705	0	1	5	FALSE	MADH1	122	1	0	0	0.64655994	TF_other	FALSE	0	MADH1	0	0
9281	2.42767296	2.62E-04	0.4119171	0.02941176	17	4	FALSE	KCNA3	153.1764706	17	0	0	0.76205451	up	FALSE	0	KCNA3	399070	0.14534851
9299	2.6918239	6.49E-05	0.37149533	0.07575758	12	5	FALSE	KCNA4	123	12	0	0	0.71802935	down	FALSE	0	KCNA4	84310	0.19475358
9312	3.05260149	1.36E-05	0.32758944	0	3	5	FALSE	KCNE2	196.3333333	3	0	0	0.65789975	down	FALSE	0	KCNE2	16006	0.37277354
9316	2.68381933	6.23E-05	0.37260332	0.02564103	13	5	FALSE	KCNF1	133.2307692	13	0	0	0.71936345	down	FALSE	0	KCNF1	93786	0.20316187
9330	2.39336764	6.29E-04	0.41782131	0.03903904	37	4	FALSE	KCNH5	113.5945946	37	0	0	0.76777206	down	FALSE	0	KCNH5	850424	0.1092038
9368	2.33790738	2.65E-04	0.42773294	0.15384615	13	5	FALSE	KCNJ15	234.0769231	13	0	0	0.77701544	up	FALSE	0	KCNJ15	484586	0.20010528
9382	2.30989137	0.00102347	0.43292079	0.03030303	33	5	FALSE	KCNN3	147.3030303	33	0	0	0.78168477	up	FALSE	0	KCNN3	1366012	0.12366291
9416	2.7135506	2.91E-04	0.36852086	0	18	5	FALSE	KCNQ2	126.2777778	18	0	0	0.71440823	down	FALSE	0	KCNQ2	247170	0.15581813
9435	2.50314465	2.18E-04	0.39949749	0	11	5	FALSE	KCTD16	223.5454546	11	0	0	0.74947589	up	FALSE	0	KCTD16	411860	0.21925661
9447	2.91023442	3.83E-05	0.34361493	0.14285714	7	5	FALSE	KHDRBS2	113.2857143	7	0	0	0.6816276	down	FALSE	0	KHDRBS2	28646	0.19869215
9455	2.48256146	2.60E-04	0.40280977	0	11	5	FALSE	KIAA0040	212.8181818	11	0	0	0.75290642	up	FALSE	0	KIAA0040	366180	0.20485317
9467	2.79588336	3.56E-04	0.35766871	0	13	5	FALSE	KIAA0101	105.3076923	13	0	0	0.70068611	up	FALSE	0	KIAA0101	221172	0.14114708
9481	3.69068039	8.90E-07	0.27095275	0	2	5	FALSE	KIAA1107	69	2	0	0	0.55155327	down	FALSE	0	KIAA1107	858	0.53125
9484	2.62264151	5.49E-05	0.38129496	0	5	5	FALSE	KIAA1958	310.4	5	0	0	0.72955975	down	FALSE	0	KIAA1958	118118	0.34225664
9490	2.81360778	1.75E-04	0.35541557	0	18	5	FALSE	KIF20A	84.05555556	18	0	0	0.69773204	up	FALSE	0	KIF20A	129108	0.11535494
9509	2.48141795	3.72E-04	0.40299539	0	20	5	FALSE	KIF5C	171.8	20	0	0	0.75309701	down	FALSE	0	KIF5C	626796	0.16518375
9530	2.60320183	0.00116358	0.38414232	0	34	5	FALSE	KIT	98.11764706	34	0	0	0.7327997	down	FALSE	0	KIT	689842	0.10814883
9568	3.36649514	0	0.29704484	0	1	5	FALSE	HNRNPD	18	1	0	0	0.60558414	TF_other	FALSE	0	HNRNPD	0	0
9578	3.36649514	0	0.29704484	0	1	5	FALSE	NANOG	18	1	0	0	0.60558414	TF_other	FALSE	0	NANOG	0	0
9581	2.99828473	0	0.33352403	1	2	5	FALSE	KLF8	137.5	2	0	0	0.66695254	TF_up	FALSE	0	KLF8	0	0.50738007
9583	3.04574042	9.70E-07	0.32832739	0	3	5	FALSE	KLHDC7B	98.33333333	3	0	0	0.65904326	up	FALSE	0	KLHDC7B	728	0.48911223
9587	2.45797599	5.31E-04	0.4068388	0	25	5	FALSE	KLHL35	160.48	25	0	0	0.757004	down	FALSE	0	KLHL35	882044	0.15203051
9613	2.39222413	5.93E-04	0.41802103	0	19	5	FALSE	KLHL6	182.4736842	19	0	0	0.76796265	up	FALSE	0	KLHL6	826124	0.16319576
9633	2.73870783	1.70E-05	0.3651357	0.33333333	3	5	FALSE	KLRB1	237.3333333	3	0	0	0.71021536	up	FALSE	0	KLRB1	22374	0.39044481
9637	2.4105203	5.54E-04	0.4148482	0	22	5	FALSE	KPNA2	153.4090909	22	0	0	0.76491328	up	FALSE	0	KPNA2	773246	0.13905939
9660	2.46769583	0.00141636	0.40523633	0	34	5	FALSE	KRT14	111.5	34	0	0	0.75538403	down	FALSE	0	KRT14	1026386	0.10604607
9695	3.35334477	9.25E-06	0.29820972	0	5	5	FALSE	KRT6C	81	5	0	0	0.60777587	up	FALSE	0	KRT6C	9280	0.29850746
9701	2.95483133	7.61E-05	0.33842879	0	9	5	FALSE	KYNU	102.2222222	9	0	0	0.67419478	up	FALSE	0	KYNU	46864	0.17040778
9711	2.37221269	9.93E-04	0.42154736	0.01051051	37	5	FALSE	L3MBTL3	108.3243243	37	0	0	0.77129788	up	FALSE	0	L3MBTL3	1052108	0.09920714
9749	2.79931389	3.96E-05	0.35723039	0	4	5	FALSE	LAIR1	271.5	4	0	0	0.70011435	up	FALSE	0	LAIR1	52434	0.37105624
9754	2.7890223	3.02E-05	0.35854859	0	3	5	FALSE	LAIR2	325.3333333	3	0	0	0.70182962	up	FALSE	0	LAIR2	62814	0.43244444
9758	3.11606632	9.22E-06	0.32091743	0	3	5	FALSE	LAMP3	179.3333333	3	0	0	0.64732228	up	FALSE	0	LAMP3	7682	0.36468984
9762	2.45969125	1.73E-04	0.40655509	0.11111111	10	5	FALSE	LAPTM5	226.7	10	0	0	0.75671812	up	FALSE	0	LAPTM5	238894	0.21655502
9773	2.44711264	2.63E-04	0.40864486	0.12087912	14	4	FALSE	LAT	162.2142857	14	0	0	0.75881456	up	FALSE	0	LAT	178588	0.16137302
9788	3.65237278	1.53E-06	0.27379461	0	3	6	FALSE	LAT2	90.33333333	3	0	0	0.55793787	up	FALSE	0	LAT2	2250	0.54471545
9792	2.6535163	1.64E-04	0.37685844	0.01818182	11	5	FALSE	LAX1	117.4545455	11	0	0	0.72441395	up	FALSE	0	LAX1	85244	0.15011115
9804	2.83190395	1.13E-05	0.35311932	0	4	5	FALSE	LBP	242.25	4	0	0	0.69468268	up	FALSE	0	LBP	28408	0.34123055
9809	2.39279588	4.24E-04	0.41792115	0	13	5	FALSE	LCP1	241.1538462	13	0	0	0.76786735	up	FALSE	0	LCP1	718976	0.21480666
9823	2.40880503	3.10E-04	0.4151436	0.08496732	18	5	FALSE	LCP2	132.3333333	18	0	0	0.76519916	up	FALSE	0	LCP2	256008	0.12488174
9842	2.64265294	1.32E-04	0.37840762	0.04761905	15	5	FALSE	LCTL	137.4	15	0	0	0.72622451	down	FALSE	0	LCTL	165976	0.16662607
9858	3.12978845	4.02E-05	0.31951041	0	9	5	FALSE	LECT1	98.33333333	9	0	0	0.64503526	down	FALSE	0	LECT1	44446	0.22273074
9868	2.44596913	0.00164096	0.4088359	0.0270936	29	5	FALSE	LEP	125.862069	29	0	0	0.75900515	up	FALSE	0	LEP	869224	0.1269259
9877	3.44539737	0	0.29024228	0	1	6	FALSE	KHDRBS1	29	1	0	0	0.59243377	TF_other	FALSE	0	KHDRBS1	0	0
9899	2.39336764	2.45E-04	0.41782131	0.11428571	15	4	FALSE	LETM2	176.1333333	15	0	0	0.76777206	up	FALSE	0	LETM2	293214	0.16131007
9915	3	3.08E-05	0.33333333	0	4	5	FALSE	LGALS2	149.75	4	0	0	0.66666667	up	FALSE	0	LGALS2	10748	0.27144161
9920	2.34991424	0.00107375	0.42554745	0.02222222	36	4	FALSE	LGR4	109.1666667	36	0	0	0.77501429	down	FALSE	0	LGR4	921614	0.09686292
9957	2.54945683	4.34E-04	0.39224041	0	25	5	FALSE	LIF	108.32	25	0	0	0.74175719	up	FALSE	0	LIF	455704	0.11109731
9983	3.5025729	7.91E-05	0.28550441	0	3	5	FALSE	LILRB1	86	3	0	0	0.58290452	up	FALSE	0	LILRB1	15770	0.47222222
9987	4.29388222	0	0.23288948	0	1	6	FALSE	LILRB2	6	1	0	0	0.45101963	up	FALSE	0	LILRB2	0	0
9989	2.78044597	4.66E-05	0.35965453	0	8	5	FALSE	LILRB3	186.375	8	0	0	0.70325901	up	FALSE	0	LILRB3	96282	0.24949529
9998	3.21326472	1.61E-04	0.31120996	0	2	5	FALSE	LILRB4	215.5	2	0	0	0.63112255	up	FALSE	0	LILRB4	18742	0.50116822
10001	2.40880503	2.03E-04	0.4151436	0.10526316	19	4	FALSE	LIME1	132.0526316	19	0	0	0.76519916	down	FALSE	0	LIME1	187354	0.12735417
10021	3.29559748	2.51E-05	0.30343511	0	7	5	FALSE	LINC00290	73.57142857	7	0	0	0.61740042	down	FALSE	0	LINC00290	17300	0.22193097
10029	2.59691252	4.41E-05	0.38507266	0	4	5	FALSE	LINC00471	411.25	4	0	0	0.73384791	down	FALSE	0	LINC00471	131798	0.43971061
10034	2.76672384	1.49E-04	0.36143831	0	13	5	FALSE	LIPG	130.6923077	13	0	0	0.70554603	up	FALSE	0	LIPG	145876	0.17177789
10048	3.87135506	0	0.25830749	0	1	6	FALSE	LIPN	45	1	0	0	0.52144082	up	FALSE	0	LIPN	0	0
10050	3.07661521	5.01E-05	0.32503252	0	13	5	FALSE	LIPT2	109.1538462	13	0	0	0.65389747	down	FALSE	0	LIPT2	71300	0.21630769
10064	2.51858205	4.37E-04	0.39704881	0.02	25	5	FALSE	LIX1	86.36	25	0	0	0.74690299	down	FALSE	0	LIX1	275884	0.09611672
10090	2.42309891	3.85E-04	0.41269467	0	17	5	FALSE	LMNB1	187.8823529	17	0	0	0.76281685	up	FALSE	0	LMNB1	677528	0.17255988
10108	2.62778731	1.42E-04	0.3805483	0.02941176	17	5	FALSE	LMOD2	114.4705882	17	0	0	0.72870212	down	FALSE	0	LMOD2	158376	0.15028363
10126	3.42481418	1.89E-05	0.29198664	0	10	5	FALSE	LOC100129518	57.5	10	0	0	0.5958643	down	FALSE	0	LOC100129518	14482	0.27560976
10137	2.6969697	2.14E-04	0.37078652	0.03463203	22	5	FALSE	LOC100130275	93.5	22	0	0	0.71717172	up	FALSE	0	LOC100130275	180242	0.13950314
10160	2.5997713	3.53E-04	0.38464922	0.02164502	22	5	FALSE	LOC100240735	79.72727273	22	0	0	0.73337145	up	FALSE	0	LOC100240735	223938	0.09899749
10183	3.24699828	1.96E-05	0.30797676	0	6	5	FALSE	LOC100288198	79.66666667	6	0	0	0.62550029	down	FALSE	0	LOC100288198	16084	0.23694779
10190	2.93539165	5.11E-05	0.34067004	0.01818182	11	5	FALSE	LOC100506385	57.09090909	11	0	0	0.67743472	down	FALSE	0	LOC100506385	21544	0.16599625
10202	3.76386507	0	0.26568434	0	1	5	FALSE	LOC100506835	73	1	0	0	0.53935582	up	FALSE	0	LOC100506835	0	0
10204	3.68038879	8.88E-06	0.27171042	0	5	6	FALSE	LOC100507032	40.2	5	0	0	0.55326853	down	FALSE	0	LOC100507032	4398	0.24197531
10210	3.18696398	0	0.31377826	0	1	5	FALSE	LOC146880	414	1	0	0	0.635506	up	FALSE	0	LOC146880	0	0
10212	3.23956547	0	0.30868337	0	1	5	FALSE	LOC339535	407	1	0	0	0.62673909	down	FALSE	0	LOC339535	0	0
10214	2.52258433	7.16E-04	0.39641886	0.02439024	41	5	FALSE	LOC340544	76.65853659	41	0	0	0.74623594	down	FALSE	0	LOC340544	539066	0.09320238
10256	2.56203545	3.94E-04	0.39031466	0	21	5	FALSE	LOC375295	133.9047619	21	0	0	0.73966076	up	FALSE	0	LOC375295	458934	0.13960584
10278	3.18696398	0	0.31377826	0	1	5	FALSE	LOC541472	414	1	0	0	0.635506	up	FALSE	0	LOC541472	0	0
10280	2.68553459	1.12E-04	0.37236534	0	10	5	FALSE	LOC606724	174	10	0	0	0.71907757	up	FALSE	0	LOC606724	198584	0.20376914
10291	3.23956547	0	0.30868337	0	1	5	FALSE	LOC644936	407	1	0	0	0.62673909	up	FALSE	0	LOC644936	0	0
10293	3.91823899	0	0.25521669	0	1	6	FALSE	LOC731424	43	1	0	0	0.51362683	up	FALSE	0	LOC731424	0	0
10295	2.43967982	4.59E-04	0.40988985	0.02849003	27	5	FALSE	LOXL1	134.8148148	27	0	0	0.76005336	down	FALSE	0	LOXL1	689258	0.12881211
10323	2.39565466	4.87E-04	0.41742243	0.03908046	30	5	FALSE	LPPR5	117.4	30	0	0	0.76739089	down	FALSE	0	LPPR5	621590	0.11100569
10354	2.37735849	5.46E-04	0.42063492	0.06084656	28	4	FALSE	LPXN	119.8571429	28	0	0	0.77044025	up	FALSE	0	LPXN	586710	0.10976891
10383	2.48427673	1.56E-04	0.40253165	0	9	5	FALSE	LRBA	282.3333333	9	0	0	0.75262055	up	FALSE	0	LRBA	376200	0.27208253
10393	2.9079474	2.62E-05	0.34388517	0	5	5	FALSE	LRG1	187.2	5	0	0	0.68200877	up	FALSE	0	LRG1	54298	0.29462025
10399	2.65637507	1.38E-04	0.37645286	0.07142857	21	5	FALSE	LRRC10B	108.4285714	21	0	0	0.72393749	down	FALSE	0	LRRC10B	166972	0.15810359
10421	2.66209262	7.92E-05	0.37564433	0	6	5	FALSE	LRRC15	220	6	0	0	0.72298456	up	FALSE	0	LRRC15	119364	0.25288684
10428	2.4808462	1.36E-04	0.40308827	0.12727273	11	5	FALSE	LRRC17	221.3636364	11	0	0	0.7531923	down	FALSE	0	LRRC17	305964	0.21402799
10440	2.83704974	1.62E-05	0.35247884	0.1	5	5	FALSE	LRRC25	147.6	5	0	0	0.69382504	up	FALSE	0	LRRC25	15328	0.25880282
10446	2.51343625	7.76E-05	0.39786169	0	9	4	FALSE	LRRC32	202	9	0	0	0.74776063	up	FALSE	0	LRRC32	159362	0.22333333
10456	3.05546026	0	0.32728293	0	1	5	FALSE	LRRC70	508	1	0	0	0.65742329	up	FALSE	0	LRRC70	0	0
10458	2.41966838	0.00151955	0.41327977	0	14	5	FALSE	LRRN3	216.3571429	14	0	0	0.7633886	down	FALSE	0	LRRN3	1051232	0.19703307
10467	3.41909663	0	0.29247492	0	1	6	FALSE	PIAS2	14	1	0	0	0.59681723	TF_other	FALSE	0	PIAS2	0	0
10474	2.37964551	5.10E-04	0.42023066	0.04307692	26	4	FALSE	LRRTM2	108.9615385	26	0	0	0.77005908	down	FALSE	0	LRRTM2	454570	0.10067138
10501	2.45111492	0.00119969	0.40797761	0.01328904	43	5	FALSE	LRRTM3	70	43	0	0	0.75814751	down	FALSE	0	LRRTM3	646244	0.07203984
10545	2.40708977	3.42E-04	0.41543943	0.07792208	22	5	FALSE	LSP1	146.4545455	22	0	0	0.76548504	up	FALSE	0	LSP1	507868	0.13696004
10568	2.757004	7.91E-05	0.36271257	0	7	5	FALSE	LST1	183	7	0	0	0.707166	up	FALSE	0	LST1	109468	0.23697917
10576	2.43510577	5.99E-04	0.41065978	0.01904762	21	4	FALSE	LTB	148.1904762	21	0	0	0.7608157	up	FALSE	0	LTB	547134	0.14175824
10598	2.31217839	0.00211763	0.43249258	0	49	4	FALSE	LTBP1	115.7959184	49	0	0	0.7813036	down	FALSE	0	LTBP1	2277280	0.09853727
10648	2.49285306	2.80E-04	0.40114679	0	14	5	FALSE	LY86	185.5714286	14	0	0	0.75119116	up	FALSE	0	LY86	426014	0.18059827
10663	2.79302459	2.24E-04	0.3580348	0	4	5	FALSE	LY96	273.5	4	0	0	0.70116257	up	FALSE	0	LY96	100282	0.36430481
10668	2.48256146	0.00164489	0.40280977	0	16	5	FALSE	LYN	153	16	0	0	0.75290642	up	FALSE	0	LYN	530214	0.15605749
10680	3.48198971	0	0.28719212	0	1	6	FALSE	ETV7	16	1	0	0	0.58633505	TF_other	FALSE	0	ETV7	0	0
10686	2.53401944	2.40E-04	0.39462996	0.00333333	25	5	FALSE	LYPD6	118.12	25	0	0	0.74433009	down	FALSE	0	LYPD6	383082	0.13333333
10712	2.70040023	1.18E-04	0.37031548	0	8	5	FALSE	LYZ	166.375	8	0	0	0.71659996	up	FALSE	0	LYZ	111250	0.20316339
10721	3.23213265	3.15E-05	0.30939324	0	8	5	FALSE	MAGEE1	79.75	8	0	0	0.62797789	down	FALSE	0	MAGEE1	19572	0.23093842
10730	2.36249285	8.97E-04	0.4232817	0.0172043	31	5	FALSE	MAP2K6	123.483871	31	0	0	0.77291786	down	FALSE	0	MAP2K6	962922	0.10913262
10762	2.61978273	7.63E-05	0.38171104	0	5	5	FALSE	MAP3K1	324.8	5	0	0	0.73003621	down	FALSE	0	MAP3K1	123864	0.35977778
10768	2.46312178	3.40E-04	0.40598886	0	14	5	FALSE	MAP3K8	218.4285714	14	0	0	0.75614637	up	FALSE	0	MAP3K8	560982	0.20747001
10783	2.63350486	2.23E-04	0.3797221	0	16	5	FALSE	MAP4K1	129.6875	16	0	0	0.72774919	up	FALSE	0	MAP4K1	238502	0.14508174
10800	3.25214408	5.97E-06	0.30748945	0	5	5	FALSE	MAP7D2	150.6	5	0	0	0.62464265	down	FALSE	0	MAP7D2	13090	0.42621083
10806	2.63121784	2.68E-04	0.38005215	0	15	5	FALSE	MASP1	150.3333333	15	0	0	0.72813036	down	FALSE	0	MASP1	268828	0.16666667
10822	2.70154374	1.38E-04	0.37015873	0	16	5	FALSE	MCAM	124.5625	16	0	0	0.71640938	up	FALSE	0	MCAM	180450	0.15123929
10839	3.04974271	7.85E-06	0.32789651	0	2	5	FALSE	MCHR2	308.5	2	0	0	0.65837621	up	FALSE	0	MCHR2	15838	0.57909605
10842	2.37621498	0.00153619	0.42083734	0	27	5	FALSE	MCL1	146.5555556	27	0	0	0.77063084	up	FALSE	0	MCL1	1152162	0.12869634
10870	2.72955975	3.74E-04	0.36635945	0	13	5	FALSE	MCM10	126.3076923	13	0	0	0.71174004	up	FALSE	0	MCM10	252468	0.15663462
10873	3.36592338	2.04E-06	0.29709529	0	3	6	FALSE	E2F3	14.33333333	3	0	0	0.60567944	TF_other	FALSE	0	E2F3	4168	0.41666667
10885	2.56203545	1.33E-04	0.39031466	0	10	5	FALSE	MCOLN2	211.6	10	0	0	0.73966076	up	FALSE	0	MCOLN2	279628	0.22121849
10896	2.71012007	1.01E-04	0.36898734	0.03267974	18	5	FALSE	MCOLN3	110.2777778	18	0	0	0.71497999	down	FALSE	0	MCOLN3	142516	0.1799854
10915	2.40880503	8.74E-04	0.4151436	0.01351351	37	5	FALSE	MCTP1	104.1621622	37	0	0	0.76519916	up	FALSE	0	MCTP1	1031182	0.09766991
10953	2.43281875	4.21E-04	0.41104583	0	17	5	FALSE	MCTP2	176.1764706	17	0	0	0.76119687	up	FALSE	0	MCTP2	599538	0.16341089
11004	2.59919954	1.31E-04	0.38473383	0	11	5	FALSE	MEFV	157.5454546	11	0	0	0.73346674	up	FALSE	0	MEFV	186614	0.16960504
11016	2.86792453	1.14E-05	0.34868421	0	2	5	FALSE	MEPE	419.5	2	0	0	0.68867925	up	FALSE	0	MEPE	31166	0.60917031
11019	2.58433391	7.46E-05	0.3869469	0	6	5	FALSE	MEST	326	6	0	0	0.73594435	down	FALSE	0	MEST	176368	0.34574468
11026	2.4373928	2.29E-04	0.41027445	0.05882353	17	5	FALSE	METRNL	161.7647059	17	0	0	0.76043453	up	FALSE	0	METRNL	383050	0.15361345
11044	2.3567753	7.52E-04	0.42430859	0.0270936	29	5	FALSE	MFHAS1	148.0344828	29	0	0	0.77387078	up	FALSE	0	MFHAS1	1115150	0.12877579
11074	2.59919954	2.79E-05	0.38473383	0.2	5	5	FALSE	MICAL1	247.4	5	0	0	0.73346674	up	FALSE	0	MICAL1	50222	0.2947494
11080	2.77701544	6.15E-05	0.36009883	0	7	5	FALSE	MIR21	179.8571429	7	0	0	0.70383076	up	FALSE	0	MIR21	92968	0.23441303
11088	3.18696398	0	0.31377826	0	1	5	FALSE	MIR218-1	414	1	0	0	0.635506	down	FALSE	0	MIR218-1	0	0
11090	3.57690109	1.40E-05	0.27957161	0	2	5	FALSE	MIR223	87	2	0	0	0.57051649	up	FALSE	0	MIR223	2342	0.50292398
11093	2.67581475	5.51E-05	0.37371795	0	4	5	FALSE	MLKL	355	4	0	0	0.72069754	up	FALSE	0	MLKL	110912	0.4159812
11098	2.30474557	0.00544642	0.43388737	0.03974359	40	4	FALSE	MMP13	99.525	40	0	0	0.78254241	up	FALSE	0	MMP13	1182496	0.08417587
11101	3.18753573	3.47E-06	0.31372197	0	2	5	FALSE	HDAC4	47.5	2	0	0	0.63541071	TF_other	FALSE	0	HDAC4	854	0.56024096
11111	3.17667238	5.08E-06	0.31479482	0	3	5	FALSE	SPDEF	44	3	0	0	0.63722127	TF_other	FALSE	0	SPDEF	1182	0.42574257
11117	3.30417381	0	0.30264752	0	1	5	FALSE	MAF	40	1	0	0	0.61597103	TF_other	FALSE	0	MAF	0	0
11140	3.24871355	8.60E-07	0.30781415	0	2	5	FALSE	ING2	27	2	0	0	0.62521441	TF_other	FALSE	0	ING2	424	0.54166667
11143	2.2109777	0.00780113	0.4522886	0.07402032	53	4	FALSE	MMP2	95.94339623	53	0	0	0.79817038	up	FALSE	0	MMP2	1558274	0.07234844
11148	3.21040595	0	0.31148709	0	1	5	FALSE	SSX2	53	1	0	0	0.63159901	TF_other	FALSE	0	SSX2	0	0
11150	3.17038308	2.61E-06	0.3154193	0	2	5	FALSE	HTATIP2	44.5	2	0	0	0.63826949	TF_other	FALSE	0	HTATIP2	526	0.56493506
11166	3.21040595	0	0.31148709	0	1	5	FALSE	HOXB7	53	1	0	0	0.63159901	TF_other	FALSE	0	HOXB7	0	0
11200	2.65637507	1.31E-04	0.37645286	0	8	5	FALSE	MMP20	184.75	8	0	0	0.72393749	down	FALSE	0	MMP20	163740	0.21218245
11209	2.97884505	5.06E-05	0.33570058	0	5	5	FALSE	MMP26	133.6	5	0	0	0.67019249	down	FALSE	0	MMP26	22296	0.23935018
11215	2.57461407	0.00206362	0.38840773	0.04761905	21	4	FALSE	MMP7	75.85714286	21	0	0	0.73756432	up	FALSE	0	MMP7	274344	0.09311645
11225	3.57404231	0	0.27979523	0	1	5	FALSE	NCOA3	21	1	0	0	0.57099295	TF_other	FALSE	0	NCOA3	0	0
11238	2.29331046	0.00939162	0.43605086	0.02185792	61	4	FALSE	MMP9	74.47540984	61	0	0	0.78444826	up	FALSE	0	MMP9	1684730	0.06343855
11241	3.29273871	0	0.30369856	0	1	5	FALSE	MAZ	61	1	0	0	0.61787688	TF_other	FALSE	0	MAZ	0	0
11279	3.29273871	0	0.30369856	0	1	5	FALSE	MTA1	61	1	0	0	0.61787688	TF_other	FALSE	0	MTA1	0	0
11301	3.18067467	6.23E-06	0.31439871	0	3	5	FALSE	ELF3	46.66666667	3	0	0	0.63655422	TF_other	FALSE	0	ELF3	1562	0.43492063
11303	2.56603774	1.41E-04	0.38970588	0	9	5	FALSE	MMRN1	236.1111111	9	0	0	0.73899371	up	FALSE	0	MMRN1	232160	0.24853183
11313	2.49285306	1.34E-04	0.40114679	0.10714286	8	5	FALSE	MNDA	273.25	8	0	0	0.75119116	up	FALSE	0	MNDA	248284	0.27275
11322	2.53744997	2.75E-04	0.39409644	0	17	5	FALSE	MOXD1	143.7647059	17	0	0	0.74375834	down	FALSE	0	MOXD1	408838	0.14702853
11340	3.10806175	2.02E-05	0.32174393	0	4	5	FALSE	MPEG1	136.5	4	0	0	0.64865638	up	FALSE	0	MPEG1	12528	0.27880658
11345	2.50428816	1.41E-04	0.39931507	0.1503268	18	4	FALSE	MPP6	142.2222222	18	0	0	0.74928531	down	FALSE	0	MPP6	277036	0.15520378
11364	2.47913093	9.19E-04	0.40336716	0.02682927	41	5	FALSE	MPPED2	87	41	0	0	0.75347818	down	FALSE	0	MPPED2	685524	0.09596383
11406	2.94511149	0.00118604	0.33954572	0	8	5	FALSE	MPZ	110.125	8	0	0	0.67581475	up	FALSE	0	MPZ	1103988	0.17772801
11407	3.94453974	0	0.253515	0	1	6	FALSE	SOX10	8	1	0	0	0.50924338	TF_other	FALSE	0	SOX10	0	0
11416	2.46140652	3.40E-04	0.40627178	0	15	5	FALSE	MPZL2	191.7333333	15	0	0	0.75643225	up	FALSE	0	MPZL2	587752	0.18147796
11432	2.42424242	3.24E-04	0.4125	0.04166667	16	5	FALSE	MPZL3	181.9375	16	0	0	0.76262626	up	FALSE	0	MPZL3	443920	0.17169744
11449	2.70268725	0.00139959	0.37000212	0.08333333	9	5	FALSE	MS4A1	101.6666667	9	0	0	0.71621879	up	FALSE	0	MS4A1	135082	0.15766701
11453	3.28416238	4.68E-06	0.30449164	0	2	5	FALSE	TFE3	33	2	0	0	0.61930627	TF_other	FALSE	0	TFE3	488	0.52459016
11455	3.70211549	0	0.27011583	0	1	6	FALSE	43010	9	1	0	0	0.54964742	TF_other	FALSE	0	43010	0	0
11461	3.0383076	0	0.3291306	0	1	5	FALSE	MS4A6A	518	1	0	0	0.66028207	up	FALSE	0	MS4A6A	0	0
11463	2.9193825	3.01E-05	0.34253819	0	4	5	FALSE	MS4A7	199	4	0	0	0.68010292	up	FALSE	0	MS4A7	39976	0.31132075
11468	2.48141795	0.0013928	0.40299539	0	21	5	FALSE	MSH2	145.4285714	21	0	0	0.75309701	up	FALSE	0	MSH2	913746	0.13927538
11490	2.51172098	9.28E-05	0.39813339	0.2	10	5	FALSE	MSR1	169	10	0	0	0.7480465	up	FALSE	0	MSR1	87254	0.18014941
11501	3.18010292	1.24E-04	0.31445523	0	8	5	FALSE	MT1G	77.5	8	0	0	0.63664951	up	FALSE	0	MT1G	75894	0.19818653
11510	3.0217267	5.30E-06	0.33093661	0	2	5	FALSE	MUCL1	309.5	2	0	0	0.66304555	up	FALSE	0	MUCL1	13602	0.5712963
11513	2.59919954	1.16E-04	0.38473383	0	8	5	FALSE	MUSK	213.375	8	0	0	0.73346674	down	FALSE	0	MUSK	169524	0.22885237
11522	2.29045169	0.00118805	0.43659511	0.04354354	37	4	FALSE	MXD1	144.5405405	37	0	0	0.78492472	up	FALSE	0	MXD1	1429146	0.11841258
11560	3.03773585	1.40E-04	0.32919255	0	16	5	FALSE	MYL3	67.1875	16	0	0	0.66037736	down	FALSE	0	MYL3	90730	0.12511815
11577	2.80217267	0.00119698	0.35686595	0	10	5	FALSE	MYL7	149.3	10	0	0	0.69963789	up	FALSE	0	MYL7	1082018	0.20231924
11586	3.80160091	0	0.26304707	0	1	6	FALSE	JARID2	10	1	0	0	0.53306651	TF_other	FALSE	0	JARID2	0	0
11589	3.06746712	3.44E-05	0.32600186	0	10	5	FALSE	MYO19	99.9	10	0	0	0.65542215	up	FALSE	0	MYO19	40792	0.20561331
11600	2.53573471	6.07E-05	0.39436302	0	4	5	FALSE	MYO1F	466.25	4	0	0	0.74404422	up	FALSE	0	MYO1F	185822	0.46947528
11605	2.61063465	3.98E-05	0.38304862	0	4	5	FALSE	MYO1G	443.25	4	0	0	0.73156089	up	FALSE	0	MYO1G	131858	0.48280568
11610	2.89193825	8.07E-06	0.34578885	0	4	5	FALSE	MZB1	250.5	4	0	0	0.68467696	up	FALSE	0	MZB1	27960	0.38033537
11615	2.567753	8.32E-05	0.38944556	0.05555556	9	5	FALSE	NAE1	155.3333333	9	0	0	0.73870783	down	FALSE	0	NAE1	92032	0.17716686
11625	3.14694111	1.97E-04	0.3177689	0	3	5	FALSE	NAIP	166.6666667	3	0	0	0.64217648	up	FALSE	0	NAIP	8112	0.3517339
11626	3.30245855	5.02E-06	0.30280471	0	2	5	FALSE	TEAD1	28	2	0	0	0.61625691	TF_other	FALSE	0	TEAD1	1664	0.50943396
11630	2.43567753	2.64E-04	0.41056338	0.04093567	19	5	FALSE	NAMPT	159	19	0	0	0.76072041	up	FALSE	0	NAMPT	419532	0.15455712
11650	2.58890795	1.16E-04	0.38626325	0.06060606	12	5	FALSE	NANOS2	137.9166667	12	0	0	0.73518201	down	FALSE	0	NANOS2	139790	0.15623815
11663	2.54259577	9.33E-05	0.39329885	0.14166667	16	4	FALSE	NAP1L2	122.5	16	0	0	0.74290071	down	FALSE	0	NAP1L2	77846	0.14754222
11680	3.77358491	1.73E-06	0.265	0	2	6	FALSE	NAPSB	49	2	0	0	0.53773585	up	FALSE	0	NAPSB	772	0.51612903
11683	2.35277301	5.42E-04	0.42503038	0.04597701	30	4	FALSE	NBEAL2	150.1333333	30	0	0	0.77453783	up	FALSE	0	NBEAL2	904072	0.1309128
11714	3.43624929	4.18E-06	0.29101498	0	3	5	FALSE	NCF1B	74.33333333	3	0	0	0.59395845	up	FALSE	0	NCF1B	3068	0.36850921
11718	3.78101772	7.10E-07	0.26447906	0	2	6	FALSE	NCF1C	53.5	2	0	0	0.53649705	up	FALSE	0	NCF1C	426	0.525
11721	2.53516295	0.00238456	0.39445196	0.03636364	11	4	FALSE	NCF2	144.0909091	11	0	0	0.74413951	up	FALSE	0	NCF2	333726	0.16090195
11726	3.53459119	0	0.28291815	0	1	5	FALSE	PLAGL2	11	1	0	0	0.57756813	TF_other	FALSE	0	PLAGL2	0	0
11729	3.53459119	0	0.28291815	0	1	5	FALSE	MED15	11	1	0	0	0.57756813	TF_other	FALSE	0	MED15	0	0
11735	2.48770726	1.23E-04	0.40197656	0	8	5	FALSE	NCF4	223.375	8	0	0	0.75204879	up	FALSE	0	NCF4	199248	0.22831109
11744	2.63464837	1.74E-04	0.37955729	0	14	5	FALSE	NCKAP1L	128.2142857	14	0	0	0.7275586	up	FALSE	0	NCKAP1L	168170	0.14229786
11759	2.75471698	1.02E-04	0.3630137	0	13	5	FALSE	NDUFS3	131.5384615	13	0	0	0.70754717	up	FALSE	0	NDUFS3	161758	0.16692898
11773	2.63407662	1.55E-04	0.37963968	0	13	5	FALSE	NEK2	152.6153846	13	0	0	0.7276539	up	FALSE	0	NEK2	190286	0.17209465
11787	3.66209262	0	0.27306792	0	1	5	FALSE	NELFA	91	1	0	0	0.5563179	down	FALSE	0	NELFA	0	0
11789	2.77415666	5.12E-05	0.36046991	0	3	5	FALSE	NETO2	344	3	0	0	0.70430722	up	FALSE	0	NETO2	32540	0.45490716
11793	3.16523728	2.49E-05	0.31593208	0	8	5	FALSE	NEURL1B	108.375	8	0	0	0.63912712	down	FALSE	0	NEURL1B	32958	0.26189024
11802	2.5077187	0.00154668	0.39876881	0.03666667	25	5	FALSE	NEUROG1	122	25	0	0	0.74871355	down	FALSE	0	NEUROG1	795832	0.12654167
11808	3.50714694	0	0.28513205	0	1	6	FALSE	NEUROG3	25	1	0	0	0.58214218	TF_other	FALSE	0	NEUROG3	0	0
11846	3.14236707	0	0.31823144	0	1	5	FALSE	TBPL1	99	1	0	0	0.64293882	TF_other	FALSE	0	TBPL1	0	0
11852	3.14236707	0	0.31823144	0	1	5	FALSE	GFI1	99	1	0	0	0.64293882	TF_other	FALSE	0	GFI1	0	0
11861	2.89651229	2.02E-05	0.3452428	0	4	5	FALSE	NFAM1	264.25	4	0	0	0.68391462	up	FALSE	0	NFAM1	24486	0.4068779
11921	2.57975986	3.32E-05	0.38763298	0.2	6	5	FALSE	NIPSNAP3B	215.1666667	6	0	0	0.73670669	down	FALSE	0	NIPSNAP3B	64792	0.25544986
11928	2.53859348	1.07E-04	0.39391892	0.01818182	11	5	FALSE	NKG7	137.9090909	11	0	0	0.74356775	up	FALSE	0	NKG7	108570	0.15867003
11940	2.5242996	1.97E-04	0.39614949	0.03636364	11	5	FALSE	NLGN1	185.1818182	11	0	0	0.74595007	down	FALSE	0	NLGN1	279032	0.19214015
11952	2.46540881	1.02E-04	0.40561224	0.06666667	10	4	FALSE	NLRC4	172.6	10	0	0	0.7557652	up	FALSE	0	NLRC4	122412	0.18020942
11963	2.60263007	5.60E-05	0.38422671	0	4	5	FALSE	NLRC5	402.25	4	0	0	0.73289499	up	FALSE	0	NLRC5	141586	0.43900438
11968	2.72441395	1.30E-05	0.36705142	0.2	5	5	FALSE	NLRP12	186.4	5	0	0	0.71259767	up	FALSE	0	NLRP12	24344	0.27555556
11974	3.0383076	0	0.3291306	0	1	5	FALSE	NLRP7	518	1	0	0	0.66028207	up	FALSE	0	NLRP7	0	0
11976	2.56317896	3.61E-04	0.39014053	0	7	5	FALSE	NNMT	292.2857143	7	0	0	0.73947017	up	FALSE	0	NNMT	220386	0.30501122
11984	2.49170955	2.63E-04	0.40133089	0.07142857	8	4	FALSE	NOD2	217.875	8	0	0	0.75138174	up	FALSE	0	NOD2	218262	0.2258316
11993	2.33790738	0.00197671	0.42773294	0.03368177	42	5	FALSE	NOS3	112	42	0	0	0.77701544	up	FALSE	0	NOS3	1260546	0.09581083
12036	2.70897656	2.46E-05	0.3691431	0	4	5	FALSE	NPL	370	4	0	0	0.71517057	up	FALSE	0	NPL	72988	0.44945189
12041	2.64722699	1.28E-04	0.37775378	0.02564103	13	5	FALSE	NPY1R	107.0769231	13	0	0	0.72546217	down	FALSE	0	NPY1R	107094	0.14174359
12055	3.01829617	2.49E-06	0.33131275	0	3	5	FALSE	NPY5R	77.33333333	3	0	0	0.66361731	down	FALSE	0	NPY5R	558	0.42407407
12059	2.35849057	0.00248371	0.424	0	36	4	FALSE	NR1D1	118.8888889	36	0	0	0.77358491	TF_down	FALSE	0	NR1D1	1583342	0.10432645
12083	3.12292739	9.00E-06	0.32021238	0	5	5	FALSE	CLOCK	35.6	5	0	0	0.64617877	TF_other	FALSE	0	CLOCK	3542	0.30086957
12097	3.12292739	9.00E-06	0.32021238	0	5	5	FALSE	ARNTL	35.6	5	0	0	0.64617877	TF_other	FALSE	0	ARNTL	3542	0.30086957
12099	2.50028588	1.06E-04	0.39995426	0	7	5	FALSE	NR1D2	320.1428571	7	0	0	0.74995235	down	FALSE	0	NR1D2	280576	0.31135889
12109	3.29445397	0	0.30354044	0	1	5	FALSE	MEF2C	39	1	0	0	0.617591	TF_other	FALSE	0	MEF2C	0	0
12143	2.29845626	0.0015316	0.43507463	0.04201681	35	4	FALSE	NR4A2	151.4857143	35	0	0	0.78359062	TF_up	FALSE	0	NR4A2	1597974	0.12465818
12178	2.26186392	0.00261251	0.44211325	0.05647841	43	4	FALSE	NR4A3	113.7674419	43	0	0	0.78968935	up	FALSE	0	NR4A3	1385322	0.09084302
12182	3.26129217	0	0.30662693	0	1	5	FALSE	TLX1	43	1	0	0	0.62311797	TF_other	FALSE	0	TLX1	0	0
12223	2.55403087	2.58E-04	0.39153794	0.05194805	22	5	FALSE	NRGN	118.0454546	22	0	0	0.74099485	up	FALSE	0	NRGN	298248	0.13428809
12246	2.432247	5.05E-04	0.41114245	0.01851852	28	5	FALSE	NRIP3	112.5357143	28	0	0	0.76129217	up	FALSE	0	NRIP3	536206	0.11006046
12275	2.38250429	4.07E-04	0.41972642	0.06666667	15	4	FALSE	NRM	213.4666667	15	0	0	0.76958262	down	FALSE	0	NRM	689508	0.18832891
12291	2.42538593	6.61E-04	0.41230552	0.02419355	32	4	FALSE	NRXN1	101.6875	32	0	0	0.76243568	down	FALSE	0	NRXN1	611228	0.10122623
12324	2.46026301	3.59E-04	0.40646061	0	16	5	FALSE	NUAK2	169.4375	16	0	0	0.75662283	up	FALSE	0	NUAK2	504628	0.16072281
12341	3.16923957	7.26E-05	0.3155331	0	14	5	FALSE	NUDT11	94.85714286	14	0	0	0.63846007	down	FALSE	0	NUDT11	62508	0.2278086
12356	2.57918811	1.73E-04	0.38771891	0.03030303	12	5	FALSE	NUSAP1	143.4166667	12	0	0	0.73680198	up	FALSE	0	NUSAP1	214144	0.15712188
12369	2.63979417	1.38E-04	0.37881741	0	10	5	FALSE	OASL	173.5	10	0	0	0.72670097	up	FALSE	0	OASL	220780	0.19580023
12380	3.17095483	1.08E-05	0.31536242	0	6	5	FALSE	OBP2A	130	6	0	0	0.63817419	down	FALSE	0	OBP2A	18732	0.33506494
12387	3.12006861	1.72E-05	0.32050577	0	6	5	FALSE	OGN	116.5	6	0	0	0.64665523	down	FALSE	0	OGN	24404	0.2578125
12394	2.51057747	2.81E-04	0.39831473	0.03703704	27	5	FALSE	OLFM2	138.5185185	27	0	0	0.74823709	down	FALSE	0	OLFM2	543622	0.1445414
12422	2.9731275	6.98E-05	0.33634615	0	10	5	FALSE	OLFML1	98.3	10	0	0	0.67114542	down	FALSE	0	OLFML1	55846	0.16435811
12433	2.51286449	0.00130152	0.39795222	0.10457516	18	4	FALSE	OLR1	113.7777778	18	0	0	0.74785592	up	FALSE	0	OLR1	201556	0.13001145
12448	3.51229274	0	0.28471431	0	1	5	FALSE	HR	18	1	0	0	0.58128454	TF_other	FALSE	0	HR	0	0
12453	2.72955975	2.94E-05	0.36635945	0	6	5	FALSE	OPLAH	127.5	6	0	0	0.71174004	down	FALSE	0	OPLAH	28486	0.21404399
12460	3.0383076	0	0.3291306	0	1	5	FALSE	OR2B3	518	1	0	0	0.66028207	up	FALSE	0	OR2B3	0	0
12462	2.78044597	8.25E-05	0.35965453	0	9	5	FALSE	ORM2	141.1111111	9	0	0	0.70325901	up	FALSE	0	ORM2	112190	0.18582375
12472	2.47512864	2.18E-04	0.4040194	0	9	5	FALSE	OSBPL3	285.2222222	9	0	0	0.75414523	up	FALSE	0	OSBPL3	410368	0.27302807
12482	3.48713551	1.22E-05	0.28676832	0	5	5	FALSE	OSCAR	80	5	0	0	0.58547742	up	FALSE	0	OSCAR	8244	0.395
12488	2.42595769	4.05E-04	0.41220834	0.00307692	26	4	FALSE	OSM	122.2692308	26	0	0	0.76234038	up	FALSE	0	OSM	539878	0.11931775
12515	2.68839337	5.74E-05	0.37196937	0.01515152	12	5	FALSE	OSMR	122.4166667	12	0	0	0.71860111	up	FALSE	0	OSMR	87874	0.17569846
12528	2.40880503	5.66E-04	0.4151436	0.02769231	26	5	FALSE	OSR2	134.8846154	26	0	0	0.76519916	down	FALSE	0	OSR2	752120	0.12619289
12555	2.79702687	4.88E-05	0.35752249	0	6	5	FALSE	OTOP1	173	6	0	0	0.70049552	down	FALSE	0	OTOP1	63000	0.23211876
12562	2.68439108	1.13E-04	0.37252396	0	10	5	FALSE	P2RX1	143.9	10	0	0	0.71926815	up	FALSE	0	P2RX1	130522	0.16792009
12573	2.85648942	0.00122056	0.35008006	0	13	5	FALSE	P2RY10	85.61538462	13	0	0	0.6905851	up	FALSE	0	P2RY10	435560	0.16889298
12586	3.85591767	0	0.25934164	0	1	6	FALSE	SPIB	13	1	0	0	0.52401372	TF_other	FALSE	0	SPIB	0	0
12588	2.34819897	3.15E-04	0.42585829	0.11578947	20	5	FALSE	PALMD	185.85	20	0	0	0.77530017	up	FALSE	0	PALMD	610988	0.15853971
12609	2.86792453	1.14E-05	0.34868421	0	2	5	FALSE	PAPLN	419.5	2	0	0	0.68867925	up	FALSE	0	PAPLN	31166	0.60917031
12612	2.54145226	7.12E-04	0.39347582	0	25	5	FALSE	PAPPA	116.6	25	0	0	0.74309129	down	FALSE	0	PAPPA	575038	0.11893004
12638	3.21955403	0	0.31060202	0	1	5	FALSE	PARM1	425	1	0	0	0.63007433	up	FALSE	0	PARM1	0	0
12640	2.79588336	4.24E-05	0.35766871	0	8	5	FALSE	PARP15	151.75	8	0	0	0.70068611	up	FALSE	0	PARP15	65110	0.20234899
12649	3.19897084	7.99E-06	0.31260054	0	2	5	FALSE	PARVG	226	2	0	0	0.63350486	up	FALSE	0	PARVG	3530	0.50904977
12673	2.43567753	9.37E-04	0.41056338	0.00634921	36	5	FALSE	PCDH10	103.5833333	36	0	0	0.76072041	up	FALSE	0	PCDH10	855276	0.10190697
12710	2.47341338	2.10E-04	0.40429958	0.07619048	15	5	FALSE	PCDH17	130.8	15	0	0	0.7544311	up	FALSE	0	PCDH17	256116	0.1338809
12726	2.7672956	7.47E-05	0.36136364	0	9	5	FALSE	PCDH19	157.1111111	9	0	0	0.70545073	down	FALSE	0	PCDH19	117386	0.20540936
12736	2.29216695	0.00147202	0.4362684	0.02547065	43	4	FALSE	PCDH7	113.1860465	43	0	0	0.78463884	down	FALSE	0	PCDH7	1511946	0.09399387
12780	3.05774728	4.36E-05	0.32703815	0	6	5	FALSE	PCDHB5	113.8333333	6	0	0	0.65704212	down	FALSE	0	PCDHB5	32198	0.20627666
12787	2.82847341	1.28E-04	0.3535476	0	12	5	FALSE	PCLO	119.1666667	12	0	0	0.69525443	up	FALSE	0	PCLO	154554	0.16856871
12800	2.36420812	0.00173069	0.42297461	0.02356902	55	4	FALSE	PCSK2	98.27272727	55	0	0	0.77263198	down	FALSE	0	PCSK2	1584002	0.0903215
12856	2.30245855	0.00142522	0.43431835	0.01393728	42	4	FALSE	PDE7A	140.1428571	42	0	0	0.78292358	up	FALSE	0	PDE7A	2026956	0.11798002
12899	2.59519726	7.48E-05	0.38532716	0	5	5	FALSE	PDE8B	321.4	5	0	0	0.73413379	down	FALSE	0	PDE8B	170296	0.34675325
12905	2.39565466	4.88E-04	0.41742243	0.08128079	29	4	FALSE	PDLIM2	108.5172414	29	0	0	0.76739089	up	FALSE	0	PDLIM2	381832	0.10289051
12935	2.66380789	1.15E-04	0.37540245	0	10	5	FALSE	PDPN	163.3	10	0	0	0.72269868	up	FALSE	0	PDPN	173136	0.18741339
12946	2.68553459	9.16E-04	0.37236534	0	28	5	FALSE	PDZRN4	87.64285714	28	0	0	0.71907757	up	FALSE	0	PDZRN4	460424	0.10339243
12964	3.29045169	4.50E-07	0.30390964	0	2	5	FALSE	IGF1R	23	2	0	0	0.61825805	TF_other	FALSE	0	IGF1R	668	0.52380952
12976	2.95940537	1.27E-05	0.33790572	0	3	5	FALSE	PEG10	260.6666667	3	0	0	0.67343244	down	FALSE	0	PEG10	28140	0.44539737
12980	2.31618067	0.0031378	0.43174525	0.01942646	47	4	FALSE	PER1	109.4255319	47	0	0	0.78063655	down	FALSE	0	PER1	1896434	0.09373797
13020	3.31560892	0	0.30160372	0	1	5	FALSE	NPAS2	47	1	0	0	0.61406518	TF_other	FALSE	0	NPAS2	0	0
13029	2.62835906	5.77E-04	0.38046552	0.01904762	21	5	FALSE	PER3	67.14285714	21	0	0	0.72860682	down	FALSE	0	PER3	205040	0.09442525
13051	2.83876501	8.01E-06	0.35226586	0.23809524	7	5	FALSE	PEX11A	118.7142857	7	0	0	0.69353917	down	FALSE	0	PEX11A	6462	0.28063643
13059	2.40080046	3.81E-04	0.41652774	0.02597403	22	5	FALSE	PEX5	151.4090909	22	0	0	0.76653326	up	FALSE	0	PEX5	570692	0.14215266
13082	2.63865066	0.00296296	0.37898158	0	13	5	FALSE	PF4	126.3846154	13	0	0	0.72689156	up	FALSE	0	PF4	1417782	0.14199843
13084	3.12807318	4.88E-06	0.31968562	0	2	5	FALSE	PBX1	57.5	2	0	0	0.64532114	TF_other	FALSE	0	PBX1	1824	0.51834862
13092	3.10177244	8.08E-06	0.32239631	0	3	5	FALSE	PKNOX1	48.66666667	3	0	0	0.64970459	TF_other	FALSE	0	PKNOX1	3420	0.36950904
13095	3.6380789	0	0.27487034	0	1	6	FALSE	MEIS1	13	1	0	0	0.56032018	TF_other	FALSE	0	MEIS1	0	0
13098	3.6380789	0	0.27487034	0	1	6	FALSE	TIAL1	13	1	0	0	0.56032018	TF_other	FALSE	0	TIAL1	0	0
13100	3.10120069	6.26E-06	0.32245575	0	3	5	FALSE	PF4V1	189	3	0	0	0.64979989	up	FALSE	0	PF4V1	8468	0.37675351
13104	2.4591195	0.00158936	0.40664962	0.06666667	10	5	FALSE	PGF	180	10	0	0	0.75681342	up	FALSE	0	PGF	288384	0.1804829
13108	3.45854774	0	0.2891387	0	1	6	FALSE	GCM1	10	1	0	0	0.59024204	TF_other	FALSE	0	GCM1	0	0
13125	3.22813036	3.30E-07	0.30977683	0	2	5	FALSE	KLF9	24	2	0	0	0.62864494	TF_other	FALSE	0	KLF9	126	0.52272727
13133	2.64608348	5.72E-04	0.37791703	0	15	5	FALSE	PHGDH	138.0666667	15	0	0	0.72565275	down	FALSE	0	PHGDH	442602	0.15540438
13149	3.51686678	3.13E-05	0.28434401	0	3	5	FALSE	PI3	54.33333333	3	0	0	0.5805222	up	FALSE	0	PI3	6200	0.34188034
13153	2.66323613	4.86E-05	0.37548304	0	7	5	FALSE	PIEZO2	253.8571429	7	0	0	0.72279398	down	FALSE	0	PIEZO2	143576	0.28897959
13161	2.36020583	5.28E-04	0.42369186	0.02923977	19	5	FALSE	PIK3AP1	197.631579	19	0	0	0.77329903	up	FALSE	0	PIK3AP1	957472	0.17155694
13181	2.44711264	2.01E-04	0.40864486	0	9	5	FALSE	PIK3C2B	297.7777778	9	0	0	0.75881456	up	FALSE	0	PIK3C2B	466392	0.27866458
13191	2.51172098	7.88E-04	0.39813339	0	16	5	FALSE	PIK3CD	132.125	16	0	0	0.7480465	up	FALSE	0	PIK3CD	402114	0.13047264
13208	2.50200114	4.83E-04	0.39968007	0	18	5	FALSE	PIK3CG	121.2222222	18	0	0	0.74966648	up	FALSE	0	PIK3CG	392484	0.11914987
13227	2.4053745	6.26E-04	0.41573568	0.01424501	27	5	FALSE	PIK3R5	110.5555556	27	0	0	0.76577092	up	FALSE	0	PIK3R5	566116	0.10336891
13255	3.0383076	0	0.3291306	0	1	5	FALSE	PILRA	518	1	0	0	0.66028207	up	FALSE	0	PILRA	0	0
13257	2.26643796	0.00342693	0.44122099	0.0139141	58	4	FALSE	PIM1	114.1206897	58	0	0	0.78892701	up	FALSE	0	PIM1	2947424	0.09373843
13282	3.26586621	0	0.30619748	0	1	5	FALSE	ABL1	58	1	0	0	0.62235563	TF_other	FALSE	0	ABL1	0	0
13317	2.4436821	7.67E-04	0.40921853	0	33	5	FALSE	PIM2	122.7878788	33	0	0	0.75938632	up	FALSE	0	PIM2	951980	0.1158781
13351	2.65122927	2.03E-04	0.37718352	0	14	5	FALSE	PIPOX	124.5714286	14	0	0	0.72479512	up	FALSE	0	PIPOX	236372	0.13947114
13366	3.18696398	0	0.31377826	0	1	5	FALSE	PKDREJ	414	1	0	0	0.635506	down	FALSE	0	PKDREJ	0	0
13368	2.43624929	2.45E-04	0.41046703	0.02205882	17	5	FALSE	PKIB	171.7058824	17	0	0	0.76062512	up	FALSE	0	PKIB	437084	0.16295632
13386	2.56889651	7.14E-05	0.3892722	0	7	5	FALSE	PKIG	286.7142857	7	0	0	0.73851725	up	FALSE	0	PKIG	194562	0.29824038
13394	2.7404231	6.45E-05	0.36490716	0	15	5	FALSE	PKN3	92.46666667	15	0	0	0.70992948	up	FALSE	0	PKN3	77258	0.15688965
13410	2.75528874	1.39E-04	0.36293837	0.03508772	19	5	FALSE	PKP3	88	19	0	0	0.70745188	down	FALSE	0	PKP3	134904	0.1446497
13430	2.9731275	6.47E-05	0.33634615	0	5	5	FALSE	PLA2G2D	139	5	0	0	0.67114542	up	FALSE	0	PLA2G2D	33560	0.23834197
13436	3.35734706	1.32E-06	0.29785422	0	2	5	FALSE	PLA2G7	123.5	2	0	0	0.60710882	up	FALSE	0	PLA2G7	770	0.56712963
13439	2.58662093	2.06E-04	0.38660477	0	14	5	FALSE	PLAC8	157.7142857	14	0	0	0.73556318	up	FALSE	0	PLAC8	286006	0.16796815
13483	3.14408233	0	0.31805783	0	1	5	FALSE	HOXD3	102	1	0	0	0.64265294	TF_other	FALSE	0	HOXD3	0	0
13492	3.14408233	0	0.31805783	0	1	5	FALSE	RFWD2	102	1	0	0	0.64265294	TF_other	FALSE	0	RFWD2	0	0
13498	2.34991424	0.00383197	0.42554745	0.08172043	31	4	FALSE	PLAUR	106.9354839	31	0	0	0.77501429	up	FALSE	0	PLAUR	635150	0.09459692
13499	3.34934248	0	0.29856606	0	1	5	FALSE	AP2B1	31	1	0	0	0.60844292	TF_other	FALSE	0	AP2B1	0	0
13505	3.23384791	2.25E-06	0.30922914	0	2	5	FALSE	FOXP2	23.5	2	0	0	0.62769201	TF_other	FALSE	0	FOXP2	378	0.5
13514	3.24585477	8.80E-07	0.30808526	0	2	5	FALSE	TFAP2B	25.5	2	0	0	0.62569087	TF_other	FALSE	0	TFAP2B	162	0.58333333
13533	2.55517439	1.16E-04	0.39136272	0	9	5	FALSE	PLCB2	243.7777778	9	0	0	0.74080427	up	FALSE	0	PLCB2	254502	0.24951467
13543	2.51172098	1.83E-04	0.39813339	0	11	5	FALSE	PLCG2	232.1818182	11	0	0	0.7480465	up	FALSE	0	PLCG2	332334	0.22866649
13555	2.54431103	1.35E-04	0.39303371	0	8	5	FALSE	PLEK	249.375	8	0	0	0.74261483	up	FALSE	0	PLEK	256932	0.25632095
13564	2.65465981	1.94E-04	0.3766961	0	9	5	FALSE	PLEK2	232.2222222	9	0	0	0.72422337	up	FALSE	0	PLEK2	208026	0.26245428
13574	2.40994854	0.00111901	0.41494662	0.04761905	22	5	FALSE	PLK3	171.3636364	22	0	0	0.76500858	up	FALSE	0	PLK3	1039594	0.15839582
13597	2.38021727	4.01E-04	0.42012971	0.05	16	5	FALSE	PLVAP	198.625	16	0	0	0.76996379	up	FALSE	0	PLVAP	635392	0.1754318
13614	2.24471126	0.00220224	0.44549159	0.03167421	52	4	FALSE	PLXNC1	123.8653846	52	0	0	0.79254812	up	FALSE	0	PLXNC1	2579296	0.09753615
13667	2.43396226	0.00165281	0.41085271	0	23	5	FALSE	PMAIP1	147.7826087	23	0	0	0.76100629	up	FALSE	0	PMAIP1	907880	0.13679647
13691	2.57690109	1.26E-04	0.38806301	0.09166667	16	4	FALSE	PNP	102.5625	16	0	0	0.73718315	up	FALSE	0	PNP	85230	0.12934576
13708	2.87021155	1.06E-05	0.34840637	0	2	5	FALSE	POM121C	457.5	2	0	0	0.68829808	down	FALSE	0	POM121C	26996	0.67931548
13736	2.75814751	2.51E-05	0.36256219	0.13888889	9	5	FALSE	PPAP2C	145	9	0	0	0.70697541	down	FALSE	0	PPAP2C	38834	0.23523035
13746	2.61520869	1.48E-04	0.38237866	0	16	5	FALSE	PPAPDC1A	157.1875	16	0	0	0.73079855	up	FALSE	0	PPAPDC1A	300656	0.17296512
13763	2.33619211	0.00235762	0.42804699	0.03292683	41	5	FALSE	PPARGC1A	115.1219512	41	0	0	0.77730132	up	FALSE	0	PPARGC1A	1362082	0.09920668
13780	3.33562035	0	0.29979431	0	1	6	FALSE	CRTC1	41	1	0	0	0.61072994	TF_other	FALSE	0	CRTC1	0	0
13806	2.6918239	2.34E-05	0.37149533	0.26666667	6	5	FALSE	PPBP	166.1666667	6	0	0	0.71802935	up	FALSE	0	PPBP	29476	0.24617284
13813	2.78216123	3.05E-05	0.3594328	0	3	5	FALSE	PPEF1	347.3333333	3	0	0	0.70297313	down	FALSE	0	PPEF1	69152	0.45331588
13817	2.52830189	2.42E-04	0.39552239	0.03030303	22	5	FALSE	PPP1R14A	122.9545455	22	0	0	0.74528302	up	FALSE	0	PPP1R14A	318186	0.1377457
13840	2.98056032	6.88E-05	0.33550739	0	14	5	FALSE	PPP1R3G	111.5714286	14	0	0	0.66990661	down	FALSE	0	PPP1R3G	110928	0.19364523
13855	2.56203545	6.65E-05	0.39031466	0	4	5	FALSE	PRCP	461.75	4	0	0	0.73966076	up	FALSE	0	PRCP	184298	0.48145246
13860	2.67352773	5.97E-05	0.37403764	0	8	5	FALSE	PRDM11	204.5	8	0	0	0.72107871	up	FALSE	0	PRDM11	130692	0.23607889
13869	2.67295597	6.79E-05	0.37411765	0.12727273	11	5	FALSE	PRKAA2	110.3636364	11	0	0	0.721174	down	FALSE	0	PRKAA2	66804	0.15615732
13881	2.32304174	0.00119614	0.4304701	0.02051282	40	4	FALSE	PRKAG2	123.8	40	0	0	0.77949304	down	FALSE	0	PRKAG2	1341078	0.10706522
13922	2.38650658	2.66E-04	0.41902252	0.0952381	21	5	FALSE	PROK2	155.952381	21	0	0	0.76891557	up	FALSE	0	PROK2	377882	0.14003083
13944	2.39565466	0.00111449	0.41742243	0.03985507	24	5	FALSE	PROX1	141.0833333	24	0	0	0.76739089	TF_up	FALSE	0	PROX1	723360	0.12768939
13968	2.96912521	1.17E-05	0.33679954	0	6	5	FALSE	PRR15	77.5	6	0	0	0.67181246	down	FALSE	0	PRR15	7914	0.27419355
13975	2.57461407	8.64E-05	0.38840773	0	7	5	FALSE	PSD4	285.8571429	7	0	0	0.73756432	up	FALSE	0	PSD4	199560	0.29921969
13983	2.59805603	7.13E-05	0.38490317	0	6	5	FALSE	PSTPIP2	303.6666667	6	0	0	0.73365733	up	FALSE	0	PSTPIP2	168040	0.32579835
13990	2.40194397	8.21E-04	0.41632945	0	21	5	FALSE	PTAFR	177.2380952	21	0	0	0.76634267	up	FALSE	0	PTAFR	899906	0.15963596
14012	2.35334477	4.32E-04	0.42492711	0.08095238	21	4	FALSE	PTGER4	178.5714286	21	0	0	0.77444254	up	FALSE	0	PTGER4	867208	0.15400115
14034	2.7724414	2.49E-05	0.36069293	0	4	5	FALSE	PTGR1	281.5	4	0	0	0.7045931	down	FALSE	0	PTGR1	56496	0.36907895
14039	2.51972556	6.37E-04	0.39686862	0.00735294	17	5	FALSE	PTGS1	146.4117647	17	0	0	0.74671241	up	FALSE	0	PTGS1	395942	0.15003032
14051	3.24013722	1.32E-06	0.3086289	0	2	5	FALSE	KLF10	37	2	0	0	0.6266438	TF_other	FALSE	0	KLF10	272	0.52941176
14058	2.31103488	0.01271236	0.43270658	0.03232323	55	4	FALSE	PTGS2	70.47272727	55	0	0	0.78149419	up	FALSE	0	PTGS2	1803742	0.06044905
14069	3.31046312	0	0.30207254	0	1	5	FALSE	SETBP1	55	1	0	0	0.61492281	TF_other	FALSE	0	SETBP1	0	0
14074	3.31046312	0	0.30207254	0	1	5	FALSE	CDX2	55	1	0	0	0.61492281	TF_other	FALSE	0	CDX2	0	0
14078	3.31046312	0	0.30207254	0	1	5	FALSE	CREBBP	55	1	0	0	0.61492281	TF_other	FALSE	0	CREBBP	0	0
14080	3.31046312	0	0.30207254	0	1	5	FALSE	DR1	55	1	0	0	0.61492281	TF_other	FALSE	0	DR1	0	0
14089	3.14179531	6.93E-06	0.31828935	0	3	5	FALSE	NFAT1	41.33333333	3	0	0	0.64303411	TF_other	FALSE	0	NFAT1	1648	0.4245614
14100	3.31046312	0	0.30207254	0	1	5	FALSE	NFATC4	55	1	0	0	0.61492281	TF_other	FALSE	0	NFATC4	0	0
14106	3.24185249	4.60E-06	0.30846561	0	2	5	FALSE	ING4	45.5	2	0	0	0.62635792	TF_other	FALSE	0	ING4	934	0.57792208
14113	3.18124643	4.70E-06	0.3143422	0	2	5	FALSE	NR0B2	56	2	0	0	0.63645893	TF_other	FALSE	0	NR0B2	1066	0.58510638
14122	2.34305317	5.17E-04	0.42679356	0.05797101	24	4	FALSE	PTPN2	176.375	24	0	0	0.7761578	up	FALSE	0	PTPN2	989196	0.15068493
14147	2.42424242	3.10E-04	0.4125	0.025	16	4	FALSE	PTPN22	157	16	0	0	0.76262626	up	FALSE	0	PTPN22	421556	0.14895138
14164	2.36592338	0.00193588	0.42266796	0.04086022	31	4	FALSE	PTPN6	109.7096774	31	0	0	0.7723461	up	FALSE	0	PTPN6	661558	0.10104145
14166	3.36535163	0	0.29714577	0	1	5	FALSE	NPM1	31	1	0	0	0.60577473	TF_other	FALSE	0	NPM1	0	0
14197	2.28530589	0.0015381	0.43757818	0.01439646	43	4	FALSE	PTPRB	110.8604651	43	0	0	0.78578235	up	FALSE	0	PTPRB	1610826	0.09232149
14241	2.35334477	4.68E-04	0.42492711	0.07189542	18	5	FALSE	PTPRC	180.8333333	18	0	0	0.77444254	up	FALSE	0	PTPRC	542352	0.1582846
14260	2.62378502	1.63E-04	0.38112879	0	12	5	FALSE	PTPRCAP	166.75	12	0	0	0.72936916	up	FALSE	0	PTPRCAP	212500	0.18335177
14273	2.44825615	2.44E-04	0.40845399	0	12	5	FALSE	PTPRE	226.1666667	12	0	0	0.75862398	up	FALSE	0	PTPRE	471056	0.21122577
14286	2.38593482	2.78E-04	0.41912293	0.0994152	19	4	FALSE	PTPRO	151.3684211	19	0	0	0.76901086	up	FALSE	0	PTPRO	371382	0.13845337
14306	2.73241852	1.64E-05	0.36597615	0.2	6	5	FALSE	PXDN	151.3333333	6	0	0	0.71126358	up	FALSE	0	PXDN	20522	0.24835526
14313	3.43167524	7.86E-06	0.29140287	0	4	6	FALSE	PXDNL	77.75	4	0	0	0.59472079	down	FALSE	0	PXDNL	3868	0.37807882
14318	3.09148085	7.64E-06	0.32346958	0	2	5	FALSE	PYHIN1	269.5	2	0	0	0.65141986	up	FALSE	0	PYHIN1	12274	0.54024145
14321	2.41738136	2.72E-04	0.41367077	0	12	5	FALSE	QPCT	268.5	12	0	0	0.76376977	up	FALSE	0	QPCT	645974	0.24384686
14334	2.43567753	3.58E-04	0.41056338	0	17	5	FALSE	RAB31	199.5882353	17	0	0	0.76072041	up	FALSE	0	RAB31	741176	0.18421914
14352	2.62321326	1.40E-04	0.38121186	0	12	5	FALSE	RAC2	180.1666667	12	0	0	0.72946446	up	FALSE	0	RAC2	215720	0.19885313
14365	2.45111492	3.41E-04	0.40797761	0	11	5	FALSE	RANBP3L	234.1818182	11	0	0	0.75814751	down	FALSE	0	RANBP3L	492068	0.21895006
14377	2.61463694	2.23E-04	0.38246228	0	17	5	FALSE	RASAL3	133.2941177	17	0	0	0.73089384	up	FALSE	0	RASAL3	255778	0.14650511
14395	2.59405374	1.06E-04	0.38549702	0.15441176	17	4	FALSE	RASD1	113.4705882	17	0	0	0.73432438	up	FALSE	0	RASD1	88408	0.15121569
14413	2.57061178	2.86E-04	0.38901246	0	19	5	FALSE	RASEF	133.1578947	19	0	0	0.73823137	up	FALSE	0	RASEF	411318	0.14074323
14433	2.30989137	0.00117867	0.43292079	0.04146341	41	4	FALSE	RASGRF1	126.8292683	41	0	0	0.78168477	up	FALSE	0	RASGRF1	1408870	0.10458149
14475	2.56718125	1.03E-04	0.38953229	0	7	5	FALSE	RASGRP1	295	7	0	0	0.73880313	up	FALSE	0	RASGRP1	217674	0.31012658
14483	2.42938822	8.73E-04	0.41162627	0.02339181	19	5	FALSE	RASGRP3	141.4736842	19	0	0	0.76176863	up	FALSE	0	RASGRP3	553724	0.13493465
14503	2.68038879	3.83E-05	0.3730802	0	3	5	FALSE	RASSF6	446.3333333	3	0	0	0.7199352	up	FALSE	0	RASSF6	98774	0.52515723
14507	2.72155517	1.20E-04	0.36743697	0	11	5	FALSE	RASSF9	147.5454546	11	0	0	0.71307414	up	FALSE	0	RASSF9	161730	0.17915092
14519	2.40708977	2.57E-04	0.41543943	0	9	5	FALSE	RCSD1	340.4444444	9	0	0	0.76548504	up	FALSE	0	RCSD1	637408	0.3063578
14537	2.66781018	1.87E-04	0.37483926	0.07142857	8	5	FALSE	RGN	119.125	8	0	0	0.72203164	down	FALSE	0	RGN	40528	0.17223837
14546	2.43453402	5.56E-04	0.41075622	0.02380952	21	4	FALSE	RGS1	106.5238095	21	0	0	0.760911	up	FALSE	0	RGS1	361520	0.10608015
14568	2.45111492	3.82E-04	0.40797761	0	13	5	FALSE	RGS16	227.3076923	13	0	0	0.75814751	up	FALSE	0	RGS16	571542	0.2132966
14582	2.3567753	2.23E-04	0.42430859	0.17582418	14	4	FALSE	RGS2	228.2857143	14	0	0	0.77387078	up	FALSE	0	RGS2	397140	0.19826087
14597	2.46540881	3.37E-04	0.40561224	0.075	16	5	FALSE	RGS4	133.375	16	0	0	0.7557652	up	FALSE	0	RGS4	326858	0.13420787
14614	2.32933105	0.00108188	0.42930781	0.04878049	41	5	FALSE	RGS7BP	119.902439	41	0	0	0.77844483	down	FALSE	0	RGS7BP	1104226	0.10251851
14656	2.47855918	3.34E-04	0.40346021	0	9	5	FALSE	RGS9	285.3333333	9	0	0	0.75357347	down	FALSE	0	RGS9	400506	0.2747182
14666	2.35391652	4.62E-04	0.4248239	0.07843137	18	4	FALSE	RHCE	179.1111111	18	0	0	0.77434725	down	FALSE	0	RHCE	636932	0.15537214
14685	2.41852487	4.73E-04	0.41347518	0.02279202	27	5	FALSE	RHOG	137.8888889	27	0	0	0.76357919	up	FALSE	0	RHOG	639502	0.13028033
14713	2.39622642	6.32E-04	0.41732283	0	20	5	FALSE	RHOH	172.05	20	0	0	0.7672956	up	FALSE	0	RHOH	792090	0.15423805
14734	2.82104059	2.53E-05	0.35447912	0	7	5	FALSE	RHPN2	193	7	0	0	0.69649323	down	FALSE	0	RHPN2	67750	0.27350427
14742	3.20983419	1.66E-05	0.31154257	0	6	5	FALSE	RIBC2	93.83333333	6	0	0	0.6316943	up	FALSE	0	RIBC2	13930	0.26676245
14749	2.70497427	3.62E-05	0.36968928	0	6	5	FALSE	RIMBP2	258.3333333	6	0	0	0.71583762	down	FALSE	0	RIMBP2	101508	0.30929487
14756	3.21955403	0	0.31060202	0	1	5	FALSE	RIPK3	425	1	0	0	0.63007433	up	FALSE	0	RIPK3	0	0
14758	2.50543168	1.28E-04	0.39913282	0.01818182	11	5	FALSE	RIPPLY2	160.4545455	11	0	0	0.74909472	down	FALSE	0	RIPPLY2	190462	0.17146763
14770	2.45797599	4.45E-04	0.4068388	0	24	5	FALSE	RMI2	158.9583333	24	0	0	0.757004	up	FALSE	0	RMI2	820712	0.15086756
14795	2.92395655	4.61E-04	0.34200235	0	3	5	FALSE	RN7SK	274.3333333	3	0	0	0.67934058	down	FALSE	0	RN7SK	264178	0.42842215
14799	2.63579188	2.02E-04	0.37939262	0.04395604	14	5	FALSE	RNASE2	119.5714286	14	0	0	0.72736802	up	FALSE	0	RNASE2	111832	0.15659703
14814	2.77358491	3.87E-05	0.36054422	0	4	5	FALSE	RNASE6	287	4	0	0	0.70440252	up	FALSE	0	RNASE6	67408	0.37730871
14819	3.20468839	5.30E-06	0.31204282	0	2	5	FALSE	RNU5F-1	228	2	0	0	0.63255193	up	FALSE	0	RNU5F-1	4840	0.52304147
14822	2.44082333	4.23E-04	0.40969782	0	18	5	FALSE	ROBO2	160.2222222	18	0	0	0.75986278	down	FALSE	0	ROBO2	597178	0.1481137
14841	2.60606061	2.06E-04	0.38372093	0	12	5	FALSE	ROR1	163.0833333	12	0	0	0.73232323	down	FALSE	0	ROR1	256858	0.17656137
14854	2.57118353	2.31E-04	0.38892595	0	18	5	FALSE	RPS9	160.2777778	18	0	0	0.73813608	up	FALSE	0	RPS9	394308	0.16748452
14873	2.40080046	1.93E-04	0.41652774	0.06666667	10	5	FALSE	RRM2	247	10	0	0	0.76653326	up	FALSE	0	RRM2	389066	0.22772643
14884	2.69239565	0.0013504	0.37141644	0	17	5	FALSE	RSPO2	106.8235294	17	0	0	0.71793406	down	FALSE	0	RSPO2	1370130	0.12921066
14897	3.6918239	0	0.27086882	0	1	6	FALSE	FOXQ1	17	1	0	0	0.55136268	TF_other	FALSE	0	FOXQ1	0	0
14903	3.21955403	0	0.31060202	0	1	5	FALSE	S100A12	425	1	0	0	0.63007433	up	FALSE	0	S100A12	0	0
14905	2.58376215	5.27E-04	0.38703253	0.01282051	13	5	FALSE	S100A8	106.8461539	13	0	0	0.73603964	up	FALSE	0	S100A8	160772	0.13554987
14919	2.8004574	9.08E-04	0.35708452	0.02564103	13	5	FALSE	S100A9	66.84615385	13	0	0	0.69992377	up	FALSE	0	S100A9	283690	0.11275925
14933	2.60434534	1.31E-04	0.38397366	0	7	5	FALSE	S100P	236.1428571	7	0	0	0.73260911	up	FALSE	0	S100P	159724	0.2589679
14941	2.61063465	3.98E-05	0.38304862	0	4	5	FALSE	S100Z	443.25	4	0	0	0.73156089	up	FALSE	0	S100Z	131858	0.48280568
14946	3.05031447	3.47E-05	0.32783505	0	7	5	FALSE	S1PR4	131	7	0	0	0.65828092	up	FALSE	0	S1PR4	47942	0.26104418
14954	2.78101772	6.83E-05	0.35958059	0	11	5	FALSE	SAA1	110.8181818	11	0	0	0.70316371	up	FALSE	0	SAA1	80944	0.19645471
14966	2.73756432	4.11E-05	0.36528822	0	6	5	FALSE	SAA2	215.6666667	6	0	0	0.71040595	up	FALSE	0	SAA2	87674	0.27070198
14973	3.50657519	0	0.28517854	0	1	5	FALSE	SAA4	203	1	0	0	0.58223747	up	FALSE	0	SAA4	0	0
14975	2.6163522	7.60E-05	0.38221154	0	5	5	FALSE	SAMSN1	359	5	0	0	0.73060797	up	FALSE	0	SAMSN1	158570	0.3986637
14981	2.50714694	2.51E-04	0.39885975	0.02941176	17	5	FALSE	SASH3	129.0588235	17	0	0	0.74880884	up	FALSE	0	SASH3	241996	0.13981802
14999	2.34362493	9.47E-04	0.42668944	0.06403941	29	5	FALSE	SAT1	123.6551724	29	0	0	0.77606251	up	FALSE	0	SAT1	695844	0.10615106
15029	2.73241852	8.92E-05	0.36597615	0	7	5	FALSE	SCARA5	169	7	0	0	0.71126358	up	FALSE	0	SCARA5	77640	0.21026283
15037	2.46140652	2.38E-04	0.40627178	0.0047619	21	4	FALSE	SCN9A	145.6666667	21	0	0	0.75643225	up	FALSE	0	SCN9A	460902	0.14771623
15059	2.71126358	1.86E-04	0.36883172	0.01904762	21	5	FALSE	SCO2	101.7619048	21	0	0	0.7147894	up	FALSE	0	SCO2	204914	0.15210843
15081	3.38822184	9.40E-07	0.29514006	0	2	6	FALSE	SDS	117	2	0	0	0.60196303	up	FALSE	0	SDS	1090	0.52727273
15084	2.81360778	1.72E-05	0.35541557	0	4	5	FALSE	SECTM1	292.25	4	0	0	0.69773204	up	FALSE	0	SECTM1	44286	0.40734266
15089	2.33676387	0.00112953	0.42794226	0.01410256	40	4	FALSE	SEL1L3	125.4	40	0	0	0.77720602	up	FALSE	0	SEL1L3	1546584	0.1090035
15130	2.57404231	0.00263508	0.388494	0.03508772	19	5	FALSE	SELE	81.94736842	19	0	0	0.73765962	up	FALSE	0	SELE	340306	0.10215551
15131	3.57347055	0	0.27984	0	1	6	FALSE	FOXF1	19	1	0	0	0.57108824	TF_other	FALSE	0	FOXF1	0	0
15143	3.57347055	0	0.27984	0	1	6	FALSE	ATF7	19	1	0	0	0.57108824	TF_other	FALSE	0	ATF7	0	0
15152	2.4436821	5.01E-04	0.40921853	0.00833333	16	5	FALSE	SELL	140	16	0	0	0.75938632	up	FALSE	0	SELL	410680	0.13613014
15169	2.71297885	1.84E-04	0.36859852	0	9	5	FALSE	SELP	139.5555556	9	0	0	0.71450353	up	FALSE	0	SELP	94420	0.17169214
15179	2.46826758	2.91E-04	0.40514246	0	12	4	FALSE	SELPLG	221.4166667	12	0	0	0.75528874	up	FALSE	0	SELPLG	439794	0.21234746
15192	2.89536878	2.44E-05	0.34537915	0	5	5	FALSE	SEMA3D	170.8	5	0	0	0.6841052	down	FALSE	0	SEMA3D	24746	0.2636646
15198	3.1509434	6.74E-05	0.31736527	0	13	5	FALSE	SEMA4A	67.38461538	13	0	0	0.64150943	up	FALSE	0	SEMA4A	38622	0.15583243
15212	2.65523156	4.29E-05	0.37661499	0	3	5	FALSE	SEMA4D	446.6666667	3	0	0	0.72412807	up	FALSE	0	SEMA4D	106662	0.51462664
15216	3.71240709	4.76E-06	0.26936701	0	3	6	FALSE	SEMA6B	28.66666667	3	0	0	0.54793215	up	FALSE	0	SEMA6B	1180	0.41919192
15220	2.43910806	3.23E-04	0.40998594	0.13235294	17	4	FALSE	SERPINA1	138.2941177	17	0	0	0.76014866	up	FALSE	0	SERPINA1	207450	0.13569322
15238	2.58090337	0.00102839	0.38746123	0.0952381	21	4	FALSE	SERPINA3	96.80952381	21	0	0	0.7365161	up	FALSE	0	SERPINA3	250784	0.12646472
15260	2.64665523	8.00E-04	0.37783539	0.03030303	12	5	FALSE	SERPINC1	90.83333333	12	0	0	0.72555746	up	FALSE	0	SERPINC1	137192	0.12391105
15261	2.33218982	0.00119022	0.42878156	0.02068966	30	4	FALSE	THRA	152.7333333	30	0	0	0.77796836	TF_down	FALSE	0	THRA	1240342	0.13030563
15274	2.30188679	0.01041469	0.43442623	0.02443609	57	4	FALSE	SERPINE1	75.40350877	57	0	0	0.78301887	up	FALSE	0	SERPINE1	2124366	0.06453904
15304	3.30131504	0	0.30290959	0	1	5	FALSE	HLTF	57	1	0	0	0.61644749	TF_other	FALSE	0	HLTF	0	0
15312	3.30131504	0	0.30290959	0	1	5	FALSE	ARNTL2	57	1	0	0	0.61644749	TF_other	FALSE	0	ARNTL2	0	0
15333	3.30131504	0	0.30290959	0	1	5	FALSE	OLIG1	57	1	0	0	0.61644749	TF_other	FALSE	0	OLIG1	0	0
15335	2.31789594	0.00106007	0.43142575	0.08735632	30	4	FALSE	SFN	136.4333333	30	0	0	0.78035068	down	FALSE	0	SFN	785032	0.11678102
15366	2.8376215	8.25E-05	0.35240782	0	10	5	FALSE	SFRP4	117.2	10	0	0	0.69372975	up	FALSE	0	SFRP4	84180	0.166
15377	2.33905089	0.00146694	0.42752383	0.01919192	45	5	FALSE	SGIP1	108.3333333	45	0	0	0.77682485	up	FALSE	0	SGIP1	1330074	0.09390681
15423	2.28301887	0.00389644	0.43801653	0.00225989	60	4	FALSE	SGK1	99.38333333	60	0	0	0.78616352	up	FALSE	0	SGK1	2680288	0.0838728
15484	2.40308748	2.71E-04	0.41613133	0.07692308	13	5	FALSE	SGK223	232.3846154	13	0	0	0.76615209	down	FALSE	0	SGK223	511820	0.21064766
15498	2.514008	4.67E-04	0.39777121	0	14	5	FALSE	SH3BP2	184.9285714	14	0	0	0.74766533	up	FALSE	0	SH3BP2	431250	0.18192737
15513	2.70325901	2.32E-04	0.36992386	0	20	5	FALSE	SH3GL2	119.8	20	0	0	0.7161235	down	FALSE	0	SH3GL2	309424	0.14347826
15534	2.87650086	1.33E-04	0.3476446	0	20	5	FALSE	SHANK3	105.05	20	0	0	0.68724986	up	FALSE	0	SHANK3	206422	0.1586128
15555	2.93596341	8.85E-06	0.3406037	0	2	5	FALSE	SHCBP1	355.5	2	0	0	0.67733943	up	FALSE	0	SHCBP1	18620	0.57455429
15558	2.59862779	2.46E-04	0.38481848	0.04615385	26	5	FALSE	SHISA6	112.6538462	26	0	0	0.73356204	down	FALSE	0	SHISA6	366950	0.13946488
15585	3.78787879	0	0.264	0	1	6	FALSE	SIGLEC10	72	1	0	0	0.53535354	up	FALSE	0	SIGLEC10	0	0
15587	3.0383076	0	0.3291306	0	1	5	FALSE	SIGLEC14	518	1	0	0	0.66028207	up	FALSE	0	SIGLEC14	0	0
15589	2.7352773	9.43E-05	0.36559365	0.06593407	14	5	FALSE	SIGLEC7	106	14	0	0	0.71078712	up	FALSE	0	SIGLEC7	53074	0.18738899
15604	2.57118353	2.06E-04	0.38892595	0	12	5	FALSE	SIGLEC9	163.25	12	0	0	0.73813608	up	FALSE	0	SIGLEC9	251858	0.17096944
15617	2.40594626	1.85E-04	0.41563688	0.11764706	17	4	FALSE	SIK1	181.1176471	17	0	0	0.76567562	up	FALSE	0	SIK1	392972	0.16920707
15635	2.72898799	1.37E-04	0.3664362	0	17	5	FALSE	SIRPA	116.4705882	17	0	0	0.71183533	up	FALSE	0	SIRPA	194318	0.14524602
15653	2.75643225	1.31E-04	0.3627878	0	11	5	FALSE	SKA3	128.7272727	11	0	0	0.70726129	up	FALSE	0	SKA3	119770	0.16354324
15665	2.51286449	1.06E-04	0.39795222	0	6	5	FALSE	SKAP1	393.8333333	6	0	0	0.74785592	up	FALSE	0	SKAP1	302810	0.39165836
15672	2.45626072	4.68E-04	0.40712291	0	16	5	FALSE	SLA	167.3125	16	0	0	0.75728988	up	FALSE	0	SLA	566518	0.15779175
15689	2.58604917	1.08E-04	0.38669025	0	7	5	FALSE	SLAMF6	275.5714286	7	0	0	0.73565847	up	FALSE	0	SLAMF6	194256	0.29715523
15697	2.77758719	9.78E-05	0.3600247	0	12	5	FALSE	SLAMF8	113.0833333	12	0	0	0.70373547	up	FALSE	0	SLAMF8	96956	0.15064964
15710	2.78101772	4.28E-05	0.35958059	0	9	5	FALSE	SLC10A4	187.7777778	9	0	0	0.70316371	down	FALSE	0	SLC10A4	103050	0.24870543
15720	2.87650086	8.48E-05	0.3476446	0	10	5	FALSE	SLC11A1	68.6	10	0	0	0.68724986	up	FALSE	0	SLC11A1	28582	0.14291755
15731	2.37106918	0.00103156	0.42175066	0.0297619	49	5	FALSE	SLC12A5	117.1632653	49	0	0	0.77148847	down	FALSE	0	SLC12A5	1446480	0.1061039
15781	2.84105203	5.15E-05	0.35198229	0	9	5	FALSE	SLC13A5	156.2222222	9	0	0	0.693158	down	FALSE	0	SLC13A5	93456	0.22302043
15791	2.48713551	3.67E-04	0.40206897	0.04395604	14	5	FALSE	SLC14A1	179.5714286	14	0	0	0.75214408	up	FALSE	0	SLC14A1	339404	0.17507688
15806	2.50200114	6.08E-04	0.39968007	0	22	5	FALSE	SLC16A10	125.4090909	22	0	0	0.74966648	up	FALSE	0	SLC16A10	594194	0.12366709
15829	2.28702115	0.0014194	0.43725	0.03939394	45	4	FALSE	SLC16A6	124.2888889	45	0	0	0.78549647	up	FALSE	0	SLC16A6	1641230	0.10291621
15875	2.63636364	1.25E-04	0.37931034	0	6	5	FALSE	SLC16A7	250.6666667	6	0	0	0.72727273	up	FALSE	0	SLC16A7	124206	0.28339009
15882	3.38193253	0	0.29568893	0	1	5	FALSE	SLC22A12	53	1	0	0	0.60301124	down	FALSE	0	SLC22A12	0	0
15884	2.41223556	6.15E-04	0.41455321	0.01724138	29	5	FALSE	SLC25A37	116.0344828	29	0	0	0.76462741	up	FALSE	0	SLC25A37	548792	0.10871828
15914	2.9348199	5.44E-05	0.34073641	0	8	5	FALSE	SLC27A1	128.375	8	0	0	0.67753002	down	FALSE	0	SLC27A1	54950	0.20778956
15923	2.46255003	4.49E-04	0.40608312	0.11111111	10	5	FALSE	SLC2A3	195.9	10	0	0	0.75624166	up	FALSE	0	SLC2A3	246384	0.19280079
15934	2.8759291	5.25E-05	0.34771372	0	9	5	FALSE	SLC37A2	141.8888889	9	0	0	0.68734515	up	FALSE	0	SLC37A2	56796	0.21509754
15944	2.83018868	3.28E-05	0.35333333	0	3	5	FALSE	SLC38A11	341.3333333	3	0	0	0.69496855	down	FALSE	0	SLC38A11	65110	0.47268519
15948	2.51743854	4.98E-05	0.39722916	0.16666667	4	5	FALSE	SLC38A4	347	4	0	0	0.74709358	down	FALSE	0	SLC38A4	97030	0.3762215
15953	2.63865066	3.28E-04	0.37898158	0	20	5	FALSE	SLC4A10	116.45	20	0	0	0.72689156	down	FALSE	0	SLC4A10	379182	0.13059955
15974	3.21955403	0	0.31060202	0	1	5	FALSE	SLC6A1	425	1	0	0	0.63007433	down	FALSE	0	SLC6A1	0	0
15976	2.62607204	5.56E-04	0.38079686	0.0094697	33	5	FALSE	SLC6A14	68.51515152	33	0	0	0.72898799	up	FALSE	0	SLC6A14	352028	0.0935041
16010	2.63693539	1.94E-04	0.3792281	0	20	5	FALSE	SLC7A10	154.85	20	0	0	0.72717743	down	FALSE	0	SLC7A10	406174	0.17443311
16031	2.36020583	7.73E-04	0.42369186	0.02016807	35	5	FALSE	SLC7A5	146.5428571	35	0	0	0.77329903	up	FALSE	0	SLC7A5	1283184	0.12847082
16067	2.44196684	9.77E-04	0.40950597	0.02651515	33	4	FALSE	SLC8A3	91.78787879	33	0	0	0.75967219	up	FALSE	0	SLC8A3	566332	0.09400187
16101	2.87021155	1.06E-05	0.34840637	0	2	5	FALSE	SLC9B2	457.5	2	0	0	0.68829808	up	FALSE	0	SLC9B2	26996	0.67931548
16104	2.46426529	7.15E-04	0.40580046	0.03448276	30	5	FALSE	SLCO5A1	112.7333333	30	0	0	0.75595578	up	FALSE	0	SLCO5A1	612452	0.11363023
16135	2.77758719	0.00130369	0.3600247	0	13	5	FALSE	SLIT2	122	13	0	0	0.70373547	down	FALSE	0	SLIT2	1402228	0.15816993
16148	3.77701544	0	0.26475931	0	1	6	FALSE	HDAC5	13	1	0	0	0.53716409	TF_other	FALSE	0	HDAC5	0	0
16150	2.34305317	7.95E-04	0.42679356	0.03703704	27	5	FALSE	SLITRK1	134.2592593	27	0	0	0.7761578	down	FALSE	0	SLITRK1	908138	0.11690624
16178	2.95483133	7.17E-05	0.33842879	0	11	5	FALSE	SLPI	105	11	0	0	0.67419478	up	FALSE	0	SLPI	72060	0.17537943
16213	2.52601487	4.31E-04	0.39588049	0.02463054	29	5	FALSE	SNAP91	99.17241379	29	0	0	0.74566419	down	FALSE	0	SNAP91	471734	0.10782464
16243	3.77587193	4.64E-06	0.26483949	0	4	6	FALSE	SNORA59A	47.75	4	0	0	0.53735468	down	FALSE	0	SNORA59A	2098	0.47222222
16248	4.07146941	0	0.24561157	0	1	6	FALSE	SNORD14A	10	1	0	0	0.48808843	down	FALSE	0	SNORD14A	0	0
16250	3.23956547	0	0.30868337	0	1	5	FALSE	SNORD14E	407	1	0	0	0.62673909	down	FALSE	0	SNORD14E	0	0
16252	3.07261292	1.85E-05	0.3254559	0	5	5	FALSE	SNORD4B	126.8	5	0	0	0.65456451	down	FALSE	0	SNORD4B	19064	0.25621181
16258	2.50485992	1.93E-04	0.39922392	0.04166667	16	4	FALSE	SNORD59A	111.6875	16	0	0	0.74919001	down	FALSE	0	SNORD59A	156776	0.12464927
16275	3.21783877	9.92E-06	0.31076759	0	5	5	FALSE	SNORD59B	37	5	0	0	0.63036021	down	FALSE	0	SNORD59B	1432	0.34951456
16281	2.6380789	7.85E-05	0.37906372	0.06060606	12	5	FALSE	SNORD61	135.1666667	12	0	0	0.72698685	down	FALSE	0	SNORD61	126976	0.17455685
16294	3.19725557	9.52E-06	0.31276824	0	6	5	FALSE	SNORD91B	111.3333333	6	0	0	0.63379074	down	FALSE	0	SNORD91B	14782	0.29188713
16301	2.5408805	2.25E-04	0.39356436	0	15	5	FALSE	SNRPF	152.0666667	15	0	0	0.74318658	down	FALSE	0	SNRPF	293236	0.15509925
16317	2.7724414	4.50E-05	0.36069293	0	4	5	FALSE	SNX10	291	4	0	0	0.7045931	up	FALSE	0	SNX10	77368	0.37760417
16322	2.757004	8.75E-05	0.36271257	0	10	5	FALSE	SNX20	131.6	10	0	0	0.707166	up	FALSE	0	SNX20	80530	0.16917098
16333	2.41852487	4.06E-04	0.41347518	0.01333333	25	4	FALSE	SOCS3	151.48	25	0	0	0.76357919	up	FALSE	0	SOCS3	740014	0.14488462
16359	2.40365923	0.00234186	0.41603235	0.02105263	20	5	FALSE	SOD2	135.95	20	0	0	0.76605679	up	FALSE	0	SOD2	700904	0.1267104
16379	3.40308748	0	0.29385081	0	1	6	FALSE	DDB2	20	1	0	0	0.59948542	TF_other	FALSE	0	DDB2	0	0
16381	2.43567753	4.08E-04	0.41056338	0.01333333	25	5	FALSE	SORL1	136.36	25	0	0	0.76072041	up	FALSE	0	SORL1	597700	0.131484
16407	2.93253288	2.08E-04	0.34100214	0.03571429	8	5	FALSE	SOX18	83	8	0	0	0.67791119	up	FALSE	0	SOX18	35132	0.23909884
16416	2.57861635	1.15E-04	0.38780488	0	6	5	FALSE	SP140	283.5	6	0	0	0.73689727	up	FALSE	0	SP140	232150	0.30021254
16423	3.28073185	2.66E-05	0.30481004	0	9	5	FALSE	SPATA18	66.22222222	9	0	0	0.61987803	down	FALSE	0	SPATA18	20068	0.21314452
16433	3.70325901	0	0.27003242	0	1	5	FALSE	SPATA22	89	1	0	0	0.54945683	up	FALSE	0	SPATA22	0	0
16435	3.01200686	7.30E-05	0.33200456	0	12	5	FALSE	SPATC1	109.0833333	12	0	0	0.66466552	up	FALSE	0	SPATC1	73806	0.19509627
16448	2.67238422	9.23E-05	0.37419769	0	10	5	FALSE	SPC25	157.9	10	0	0	0.7212693	up	FALSE	0	SPC25	118354	0.18502358
16459	2.46769583	2.23E-04	0.40523633	0	11	5	FALSE	SPCS3	264	11	0	0	0.75538403	up	FALSE	0	SPCS3	482494	0.25047619
16486	3.26586621	0	0.30619748	0	1	5	FALSE	HOXC13	83	1	0	0	0.62235563	TF_other	FALSE	0	HOXC13	0	0
16507	2.51858205	1.87E-04	0.39704881	0	11	5	FALSE	SPN	227.3636364	11	0	0	0.74690299	up	FALSE	0	SPN	369550	0.22681727
16519	2.63007433	1.52E-04	0.38021739	0	11	5	FALSE	SPON1	150.0909091	11	0	0	0.72832095	down	FALSE	0	SPON1	158248	0.16658202
16531	2.44596913	0.00584456	0.4088359	0.01111111	36	5	FALSE	SPP1	63.80555556	36	0	0	0.75900515	up	FALSE	0	SPP1	829046	0.0665552
16532	3.44539737	0	0.29024228	0	1	6	FALSE	ESRRA	36	1	0	0	0.59243377	TF_other	FALSE	0	ESRRA	0	0
16560	3.44539737	0	0.29024228	0	1	6	FALSE	MSX2	36	1	0	0	0.59243377	TF_other	FALSE	0	MSX2	0	0
16570	2.53344768	4.05E-04	0.39471903	0.05797101	24	5	FALSE	SPRR1A	95.79166667	24	0	0	0.74442539	up	FALSE	0	SPRR1A	182494	0.11094961
16595	3.55060034	0	0.28164251	0	1	5	FALSE	SPRR2E	116	1	0	0	0.57489994	up	FALSE	0	SPRR2E	0	0
16597	2.59176672	1.36E-04	0.38583719	0.04166667	16	5	FALSE	SPTSSB	116.3125	16	0	0	0.73470555	down	FALSE	0	SPTSSB	145068	0.13642394
16614	2.42595769	2.03E-04	0.41220834	0.04166667	16	5	FALSE	SQRDL	181.1875	16	0	0	0.76234038	up	FALSE	0	SQRDL	417752	0.17114929
16631	2.66152087	9.09E-05	0.37572503	0	7	5	FALSE	SRGN	200.8571429	7	0	0	0.72307986	up	FALSE	0	SRGN	130614	0.23131614
16639	2.6163522	5.54E-04	0.38221154	0.01666667	16	5	FALSE	SRPX2	96.1875	16	0	0	0.73060797	up	FALSE	0	SRPX2	175576	0.11394863
16656	2.38536306	4.76E-04	0.41922339	0.04761905	15	5	FALSE	ST6GAL1	211.8	15	0	0	0.76910616	up	FALSE	0	ST6GAL1	657992	0.18740018
16672	2.54145226	8.71E-05	0.39347582	0.08333333	9	5	FALSE	ST6GALNAC5	161.1111111	9	0	0	0.74309129	down	FALSE	0	ST6GALNAC5	128616	0.18778428
16682	2.32246998	6.84E-04	0.43057607	0.03623188	24	4	FALSE	ST8SIA4	166.875	24	0	0	0.77958834	up	FALSE	0	ST8SIA4	973550	0.14053254
16707	2.35791881	3.95E-04	0.42410281	0.0952381	21	4	FALSE	ST8SIA6	172.7142857	21	0	0	0.7736802	up	FALSE	0	ST8SIA6	551432	0.15165222
16729	2.67810177	5.71E-05	0.3733988	0.01818182	11	5	FALSE	STAB1	111	11	0	0	0.72031637	up	FALSE	0	STAB1	49096	0.15808008
16741	2.85191538	7.01E-05	0.35064154	0	11	5	FALSE	STAC	123.5454546	11	0	0	0.69134744	down	FALSE	0	STAC	95938	0.18128026
16753	2.29959977	0.00190889	0.43485828	0.02337662	56	4	FALSE	STAG2	103.8035714	56	0	0	0.78340004	up	FALSE	0	STAG2	1996266	0.08726472
16810	2.52601487	1.14E-04	0.39588049	0	6	5	FALSE	STAMBPL1	332.8333333	6	0	0	0.74566419	up	FALSE	0	STAMBPL1	264644	0.333166
16817	2.56317896	1.33E-04	0.39014053	0	7	5	FALSE	STAP1	251.1428571	7	0	0	0.73947017	up	FALSE	0	STAP1	205214	0.26330827
16852	2.74728416	7.34E-05	0.36399584	0	9	5	FALSE	STEAP1	161.3333333	9	0	0	0.70878597	up	FALSE	0	STEAP1	139094	0.20986038
16862	2.57747284	1.02E-04	0.38797693	0.08333333	16	4	FALSE	STEAP4	114.8125	16	0	0	0.73708786	up	FALSE	0	STEAP4	141934	0.14585987
16879	2.54259577	1.03E-04	0.39329885	0	9	5	FALSE	STK10	266.1111111	9	0	0	0.74290071	up	FALSE	0	STK10	261472	0.26914834
16889	3.02001144	2.83E-05	0.33112457	0.02222222	10	5	FALSE	STK33	53.7	10	0	0	0.66333143	down	FALSE	0	STK33	13148	0.17633333
16900	2.44311035	3.05E-04	0.4093143	0	15	5	FALSE	STX11	218.7333333	15	0	0	0.75948161	up	FALSE	0	STX11	675428	0.20387016
16916	2.5460263	2.43E-04	0.39276892	0	20	5	FALSE	STXBP2	158.9	20	0	0	0.74232895	up	FALSE	0	STXBP2	501956	0.16278351
16937	2.48484848	1.74E-04	0.40243902	0.01666667	16	5	FALSE	SULF2	152.125	16	0	0	0.75252525	up	FALSE	0	SULF2	272928	0.16114217
16954	2.5025729	1.54E-04	0.39958876	0	7	5	FALSE	SULT1B1	302.2857143	7	0	0	0.74957118	up	FALSE	0	SULT1B1	307478	0.29537815
16962	3.0383076	0	0.3291306	0	1	5	FALSE	SULT1C4	518	1	0	0	0.66028207	down	FALSE	0	SULT1C4	0	0
16964	2.28301887	0.00182012	0.43801653	0.03773585	54	4	FALSE	SYBU	115.1851852	54	0	0	0.78616352	up	FALSE	0	SYBU	1981046	0.09476225
17019	2.56375071	2.97E-04	0.39005352	0	22	5	FALSE	SYDE2	156.1818182	22	0	0	0.73937488	down	FALSE	0	SYDE2	552530	0.16317752
17042	2.81417953	9.16E-05	0.35534336	0	10	5	FALSE	SYK	111.1	10	0	0	0.69763674	up	FALSE	0	SYK	55096	0.15312935
17053	2.45340194	7.19E-04	0.4075973	0.03427419	32	5	FALSE	SYN1	96.4375	32	0	0	0.75776634	up	FALSE	0	SYN1	482136	0.09723631
17086	2.4488279	8.73E-04	0.40835863	0.00713012	34	5	FALSE	SYT1	91	34	0	0	0.75852868	down	FALSE	0	SYT1	728338	0.09341664
17121	2.43167524	5.75E-04	0.41123913	0	27	5	FALSE	SYT2	156.0740741	27	0	0	0.76138746	down	FALSE	0	SYT2	1027964	0.14412089
17149	2.6112064	1.63E-04	0.38296475	0	15	5	FALSE	SYT3	158.8	15	0	0	0.7314656	up	FALSE	0	SYT3	261184	0.17436464
17165	2.46483705	1.67E-04	0.40570633	0	6	5	FALSE	SYTL3	386.1666667	6	0	0	0.75586049	up	FALSE	0	SYTL3	350632	0.36612801
17172	2.6380789	5.23E-05	0.37906372	0.11111111	9	5	FALSE	TACC3	150.2222222	9	0	0	0.72698685	up	FALSE	0	TACC3	65266	0.2043353
17182	2.49285306	1.89E-04	0.40114679	0	14	5	FALSE	TACR1	193.5	14	0	0	0.75119116	up	FALSE	0	TACR1	397526	0.18653101
17197	2.61349342	4.56E-05	0.38262962	0	4	5	FALSE	TACSTD2	387.75	4	0	0	0.73108443	up	FALSE	0	TACSTD2	128888	0.42221616
17202	2.76615209	4.30E-05	0.36151302	0	6	5	FALSE	TAGAP	222.3333333	6	0	0	0.70564132	up	FALSE	0	TAGAP	85054	0.28596038
17209	2.79645512	5.43E-04	0.35759558	0	12	5	FALSE	TAGLN	114.75	12	0	0	0.70059081	up	FALSE	0	TAGLN	173218	0.15413279
17222	2.64493997	7.49E-05	0.37808042	0	6	5	FALSE	TAP2	279.8333333	6	0	0	0.72584334	up	FALSE	0	TAP2	158094	0.31471031
17229	2.53287593	3.29E-04	0.39480813	0	18	5	FALSE	TBC1D2	152.1666667	18	0	0	0.74452068	up	FALSE	0	TBC1D2	384914	0.15378094
17248	3.0754717	8.45E-05	0.32515337	0	12	5	FALSE	TBX22	81.08333333	12	0	0	0.65408805	down	FALSE	0	TBX22	69198	0.16512027
17261	2.32704403	8.81E-04	0.42972973	0.01231527	29	5	FALSE	TBXAS1	157.7241379	29	0	0	0.778826	up	FALSE	0	TBXAS1	1286380	0.13424383
17291	2.55688965	6.95E-05	0.39110018	0.13888889	9	4	FALSE	TC2N	207	9	0	0	0.74051839	up	FALSE	0	TC2N	141692	0.23538345
17301	2.59748428	1.64E-04	0.38498789	0	13	5	FALSE	TCEA3	170.8461539	13	0	0	0.73375262	down	FALSE	0	TCEA3	252804	0.18223836
17315	2.9348199	1.26E-04	0.34073641	0	8	5	FALSE	TDO2	109.625	8	0	0	0.67753002	up	FALSE	0	TDO2	56522	0.17691368
17324	2.62092624	1.88E-04	0.3815445	0	13	5	FALSE	TEAD4	158.8461539	13	0	0	0.72984563	up	FALSE	0	TEAD4	245648	0.1755797
17338	2.45683248	7.58E-04	0.40702816	0.01333333	25	5	FALSE	TEK	110.16	25	0	0	0.75719459	up	FALSE	0	TEK	428214	0.11159184
17364	2.51743854	2.13E-04	0.39722916	0.02205882	17	5	FALSE	TES	132.0588235	17	0	0	0.74709358	up	FALSE	0	TES	271528	0.142711
17382	2.49056604	1.98E-04	0.40151515	0	8	5	FALSE	TET1	282	8	0	0	0.75157233	down	FALSE	0	TET1	343394	0.27387914
17391	2.61463694	2.38E-04	0.38246228	0.10833333	16	5	FALSE	TFPI2	104.3125	16	0	0	0.73089384	up	FALSE	0	TFPI2	70142	0.13970094
17408	2.67409949	8.55E-05	0.37395767	0	8	5	FALSE	TGM2	223.125	8	0	0	0.72098342	up	FALSE	0	TGM2	145450	0.26040445
17417	2.34133791	0.00268938	0.42710623	0.03174603	28	5	FALSE	THBS1	143.9285714	28	0	0	0.77644368	up	FALSE	0	THBS1	1360626	0.12141648
17429	3.34076615	0	0.29933253	0	1	6	FALSE	SNAI1	28	1	0	0	0.60987231	TF_other	FALSE	0	SNAI1	0	0
17447	2.87021155	1.06E-05	0.34840637	0	2	5	FALSE	THEMIS	457.5	2	0	0	0.68829808	up	FALSE	0	THEMIS	26996	0.67931548
17479	2.81761006	4.91E-05	0.35491071	0	6	5	FALSE	TIFAB	209	6	0	0	0.69706499	up	FALSE	0	TIFAB	65032	0.29009763
17486	2.82447113	9.71E-05	0.35404858	0	9	5	FALSE	TIGIT	134.1111111	9	0	0	0.69592148	up	FALSE	0	TIGIT	96532	0.18616939
17496	2.71469411	1.04E-04	0.36836563	0	9	5	FALSE	TIMP4	168.6666667	9	0	0	0.71421765	up	FALSE	0	TIMP4	142478	0.2047212
17506	2.72955975	3.45E-05	0.36635945	0	4	5	FALSE	TLR10	342.25	4	0	0	0.71174004	up	FALSE	0	TLR10	91312	0.42709637
17511	2.5191538	1.03E-04	0.39695869	0.17777778	10	5	FALSE	TLR2	177.1	10	0	0	0.7468077	up	FALSE	0	TLR2	159324	0.19407895
17522	3.30646083	1.28E-05	0.30243818	0	4	5	FALSE	TLR8	96	4	0	0	0.61558986	up	FALSE	0	TLR8	9608	0.29503106
17527	2.66895369	8.41E-05	0.37467866	0.03636364	11	5	FALSE	TM4SF1	113.1818182	11	0	0	0.72184105	up	FALSE	0	TM4SF1	69336	0.16809349
17539	2.64208119	4.22E-05	0.3784895	0	4	5	FALSE	TM4SF19	357.5	4	0	0	0.7263198	up	FALSE	0	TM4SF19	108336	0.40101237
17544	2.77530017	8.10E-06	0.36032138	0	2	5	FALSE	TMC8	513	2	0	0	0.70411664	up	FALSE	0	TMC8	28160	0.67904509
17547	2.75300172	1.99E-05	0.36323988	0.04761905	7	5	FALSE	TMEM154	144.7142857	7	0	0	0.70783305	up	FALSE	0	TMEM154	32544	0.21364985
17555	2.485992	2.14E-04	0.40225391	0.14102564	13	4	FALSE	TMEM156	150.9230769	13	0	0	0.75233467	up	FALSE	0	TMEM156	163180	0.1595502
17569	2.71412236	1.92E-05	0.36844323	0	4	5	FALSE	TMEM177	362.25	4	0	0	0.71431294	down	FALSE	0	TMEM177	62234	0.44325153
17574	3.05717553	2.38E-05	0.32709931	0	5	5	FALSE	TMEM185A	135.6	5	0	0	0.65713741	down	FALSE	0	TMEM185A	19686	0.25492424
17580	2.62435678	9.39E-05	0.38104575	0.07692308	13	5	FALSE	TMEM229A	105.4615385	13	0	0	0.72927387	down	FALSE	0	TMEM229A	58732	0.1493535
17594	2.50200114	6.28E-04	0.39968007	0	14	5	FALSE	TMEM71	182.0714286	14	0	0	0.74966648	up	FALSE	0	TMEM71	443792	0.17752101
17609	3.21955403	0	0.31060202	0	1	5	FALSE	TMSB15A	425	1	0	0	0.63007433	down	FALSE	0	TMSB15A	0	0
17611	2.48656375	8.22E-04	0.40216142	0.02631579	20	5	FALSE	TNC	124.7	20	0	0	0.75223937	up	FALSE	0	TNC	428820	0.12109375
17632	2.23670669	0.01088408	0.44708589	0.03628447	53	4	FALSE	TNF	101.3584906	53	0	0	0.79388222	TF_up	FALSE	0	TNF	2454744	0.07869485
17643	3.23613493	0	0.3090106	0	1	5	FALSE	HMGB2	53	1	0	0	0.62731084	TF_other	FALSE	0	HMGB2	0	0
17664	3.23613493	0	0.3090106	0	1	5	FALSE	EGR4	53	1	0	0	0.62731084	TF_other	FALSE	0	EGR4	0	0
17675	3.23613493	0	0.3090106	0	1	5	FALSE	HDAC11	53	1	0	0	0.62731084	TF_other	FALSE	0	HDAC11	0	0
17679	3.23613493	0	0.3090106	0	1	5	FALSE	IRF5	53	1	0	0	0.62731084	TF_other	FALSE	0	IRF5	0	0
17683	3.23613493	0	0.3090106	0	1	5	FALSE	LITAF	53	1	0	0	0.62731084	TF_other	FALSE	0	LITAF	0	0
17685	3.23613493	0	0.3090106	0	1	5	FALSE	LRRFIP1	53	1	0	0	0.62731084	TF_other	FALSE	0	LRRFIP1	0	0
17691	3.0320183	4.91E-05	0.32981331	0	7	5	FALSE	TNFAIP2	98.28571429	7	0	0	0.66133028	up	FALSE	0	TNFAIP2	23940	0.18355795
17699	2.49857061	2.10E-04	0.40022883	0	10	5	FALSE	TNFAIP3	258.3	10	0	0	0.75023823	up	FALSE	0	TNFAIP3	366300	0.25324803
17710	2.67409949	1.41E-05	0.37395767	0.5	4	5	FALSE	TNFAIP6	227	4	0	0	0.72098342	up	FALSE	0	TNFAIP6	27042	0.32244318
17715	2.36763865	4.64E-04	0.42236175	0.02205882	17	5	FALSE	TNFAIP8	202.4117647	17	0	0	0.77206022	up	FALSE	0	TNFAIP8	788348	0.17860678
17733	2.9679817	1.51E-05	0.3369293	0	3	5	FALSE	TNFRSF10C	220	3	0	0	0.67200305	up	FALSE	0	TNFRSF10C	11748	0.37628866
17737	2.93138937	0.00121261	0.34113517	0	11	5	FALSE	TNFRSF17	94.45454545	11	0	0	0.67810177	up	FALSE	0	TNFRSF17	1197776	0.15447032
17743	3.93081761	0	0.2544	0	1	6	FALSE	POU2AF1	11	1	0	0	0.5115304	TF_other	FALSE	0	POU2AF1	0	0
17750	2.39336764	0.00134706	0.41782131	0	23	5	FALSE	TNFRSF1B	170.6521739	23	0	0	0.76777206	up	FALSE	0	TNFRSF1B	1124064	0.15242783
17774	2.49685535	6.45E-04	0.40050378	0	30	5	FALSE	TNFRSF21	126.2666667	30	0	0	0.75052411	up	FALSE	0	TNFRSF21	781252	0.1236591
17805	2.33161807	0.0017992	0.42888671	0.06190476	21	4	FALSE	TNFSF10	165.5714286	21	0	0	0.77806366	up	FALSE	0	TNFSF10	757320	0.1414302
17827	2.64894225	5.50E-04	0.37750917	0.00833333	16	5	FALSE	TNFSF13B	84.25	16	0	0	0.72517629	up	FALSE	0	TNFSF13B	160344	0.11644553
17844	2.49857061	1.51E-04	0.40022883	0	8	5	FALSE	TNFSF8	279.875	8	0	0	0.75023823	up	FALSE	0	TNFSF8	342156	0.27340686
17853	2.49514008	2.90E-04	0.4007791	0	15	5	FALSE	TNR	178.6	15	0	0	0.75080999	up	FALSE	0	TNR	479398	0.17411765
17869	2.3887936	0.00145915	0.41862135	0.05147059	17	5	FALSE	TOP2A	162.1764706	17	0	0	0.7685344	up	FALSE	0	TOP2A	580436	0.14484503
17872	3.38822184	0	0.29514006	0	1	6	FALSE	UHRF1	17	1	0	0	0.60196303	TF_other	FALSE	0	UHRF1	0	0
17888	2.48313322	6.25E-04	0.40271702	0.01111111	36	5	FALSE	TOX3	96.02777778	36	0	0	0.75281113	down	FALSE	0	TOX3	710762	0.10409836
17958	3.28987993	0	0.30396246	0	1	5	FALSE	SATB2	41	1	0	0	0.61835334	TF_other	FALSE	0	SATB2	0	0
17963	2.74099485	3.88E-04	0.36483104	0.01	25	5	FALSE	TPBG	81.32	25	0	0	0.70983419	up	FALSE	0	TPBG	289252	0.11714702
17989	2.32132647	5.22E-04	0.43078818	0.07635468	29	4	FALSE	TPD52	143.6206897	29	0	0	0.77977892	up	FALSE	0	TPD52	703444	0.12122982
18019	3.55060034	0	0.28164251	0	1	5	FALSE	TPSAB1	116	1	0	0	0.57489994	up	FALSE	0	TPSAB1	0	0
18021	3.65694683	3.64E-06	0.27345216	0	3	5	FALSE	TPSB2	68.66666667	3	0	0	0.55717553	up	FALSE	0	TPSB2	1074	0.63239875
18025	2.40251572	3.01E-04	0.41623037	0	10	5	FALSE	TRAF3IP3	294.9	10	0	0	0.76624738	up	FALSE	0	TRAF3IP3	618278	0.26382406
18036	3.23956547	0	0.30868337	0	1	5	FALSE	TRAJ12	407	1	0	0	0.62673909	up	FALSE	0	TRAJ12	0	0
18038	2.92624357	1.20E-05	0.34173505	0	2	5	FALSE	TRAJ17	410.5	2	0	0	0.67895941	up	FALSE	0	TRAJ17	27882	0.64285714
18041	2.92624357	1.20E-05	0.34173505	0	2	5	FALSE	TRAJ20	410.5	2	0	0	0.67895941	up	FALSE	0	TRAJ20	27882	0.64285714
18044	2.92624357	1.20E-05	0.34173505	0	2	5	FALSE	TRAJ21	410.5	2	0	0	0.67895941	up	FALSE	0	TRAJ21	27882	0.64285714
18047	2.92624357	1.20E-05	0.34173505	0	2	5	FALSE	TRAJ22	410.5	2	0	0	0.67895941	up	FALSE	0	TRAJ22	27882	0.64285714
18050	2.92624357	1.20E-05	0.34173505	0	2	5	FALSE	TRAJ23	410.5	2	0	0	0.67895941	up	FALSE	0	TRAJ23	27882	0.64285714
18053	2.92624357	1.20E-05	0.34173505	0	2	5	FALSE	TRAJ31	410.5	2	0	0	0.67895941	up	FALSE	0	TRAJ31	27882	0.64285714
18056	3.23956547	0	0.30868337	0	1	5	FALSE	TRAJ33	407	1	0	0	0.62673909	up	FALSE	0	TRAJ33	0	0
18058	3.23956547	0	0.30868337	0	1	5	FALSE	TRAJ34	407	1	0	0	0.62673909	up	FALSE	0	TRAJ34	0	0
18060	3.23956547	0	0.30868337	0	1	5	FALSE	TRAJ35	407	1	0	0	0.62673909	up	FALSE	0	TRAJ35	0	0
18062	3.23956547	0	0.30868337	0	1	5	FALSE	TRAJ38	407	1	0	0	0.62673909	up	FALSE	0	TRAJ38	0	0
18064	3.23956547	0	0.30868337	0	1	5	FALSE	TRAJ4	407	1	0	0	0.62673909	up	FALSE	0	TRAJ4	0	0
18066	3.23956547	0	0.30868337	0	1	5	FALSE	TRAJ42	407	1	0	0	0.62673909	up	FALSE	0	TRAJ42	0	0
18068	3.23956547	0	0.30868337	0	1	5	FALSE	TRAJ43	407	1	0	0	0.62673909	up	FALSE	0	TRAJ43	0	0
18070	3.23956547	0	0.30868337	0	1	5	FALSE	TRAJ44	407	1	0	0	0.62673909	up	FALSE	0	TRAJ44	0	0
18072	3.23956547	0	0.30868337	0	1	5	FALSE	TRAJ47	407	1	0	0	0.62673909	up	FALSE	0	TRAJ47	0	0
18074	3.23956547	0	0.30868337	0	1	5	FALSE	TRAJ5	407	1	0	0	0.62673909	up	FALSE	0	TRAJ5	0	0
18076	3.23956547	0	0.30868337	0	1	5	FALSE	TRAJ6	407	1	0	0	0.62673909	up	FALSE	0	TRAJ6	0	0
18078	3.00057176	4.39E-06	0.33326982	0	3	5	FALSE	TRAPPC5	232.3333333	3	0	0	0.66657137	down	FALSE	0	TRAPPC5	10204	0.41383423
18082	3.18696398	0	0.31377826	0	1	5	FALSE	TRAV36DV7	414	1	0	0	0.635506	down	FALSE	0	TRAV36DV7	0	0
18084	3.23956547	0	0.30868337	0	1	5	FALSE	TRBC2	407	1	0	0	0.62673909	up	FALSE	0	TRBC2	0	0
18086	3.23956547	0	0.30868337	0	1	5	FALSE	TRBJ2-1	407	1	0	0	0.62673909	up	FALSE	0	TRBJ2-1	0	0
18088	3.23956547	0	0.30868337	0	1	5	FALSE	TRBJ2-7	407	1	0	0	0.62673909	up	FALSE	0	TRBJ2-7	0	0
18090	3.23956547	0	0.30868337	0	1	5	FALSE	TRBV4-2	407	1	0	0	0.62673909	up	FALSE	0	TRBV4-2	0	0
18092	3.23956547	0	0.30868337	0	1	5	FALSE	TRDC	407	1	0	0	0.62673909	down	FALSE	0	TRDC	0	0
18094	2.68038879	2.26E-04	0.3730802	0	17	5	FALSE	TRDN	111.7058824	17	0	0	0.7199352	down	FALSE	0	TRDN	256554	0.13163601
18112	2.83018868	1.93E-05	0.35333333	0	5	5	FALSE	TREM1	266.4	5	0	0	0.69496855	up	FALSE	0	TREM1	53748	0.37433004
18118	2.28987993	0.00107707	0.43670412	0.05050505	45	4	FALSE	TRHDE	129.2	45	0	0	0.78502001	down	FALSE	0	TRHDE	1505564	0.10621966
18164	2.22870212	0.00211641	0.44869164	0.06101695	60	4	FALSE	TRIB1	108.4666667	60	0	0	0.79521631	up	FALSE	0	TRIB1	1972780	0.08434658
18225	2.62492853	4.44E-04	0.38096275	0	25	5	FALSE	TRIM63	97.48	25	0	0	0.72917858	up	FALSE	0	TRIM63	379630	0.10914027
18251	3.38993711	2.69E-06	0.29499072	0	2	5	FALSE	TSGA13	150	2	0	0	0.60167715	up	FALSE	0	TSGA13	3206	0.52650177
18254	2.40766152	4.44E-04	0.41534077	0.04347826	23	5	FALSE	TSPAN13	158.9565217	23	0	0	0.76538975	up	FALSE	0	TSPAN13	593256	0.14303092
18278	2.7186964	1.83E-04	0.36782334	0	14	5	FALSE	TSPAN8	115.2857143	14	0	0	0.7135506	down	FALSE	0	TSPAN8	152868	0.14232343
18293	2.3567753	2.59E-04	0.42430859	0.15151515	12	4	FALSE	TSPEAR	211.8333333	12	0	0	0.77387078	up	FALSE	0	TSPEAR	397718	0.18471616
18306	2.37106918	0.00134421	0.42175066	0	43	5	FALSE	TSSK3	135.3953488	43	0	0	0.77148847	down	FALSE	0	TSSK3	1931260	0.12021051
18350	2.46483705	1.44E-04	0.40570633	0	6	5	FALSE	TXLNB	387.6666667	6	0	0	0.75586049	down	FALSE	0	TXLNB	349614	0.36720481
18357	2.54373928	1.31E-04	0.39312205	0	6	5	FALSE	UBAC2	323	6	0	0	0.74271012	up	FALSE	0	UBAC2	218946	0.33025641
18364	2.71469411	3.30E-05	0.36836563	0	6	5	FALSE	UBD	144.1666667	6	0	0	0.71421765	up	FALSE	0	UBD	38124	0.22369792
18371	2.71926815	3.31E-05	0.36774601	0	5	5	FALSE	UBL4B	251.4	5	0	0	0.71345531	up	FALSE	0	UBL4B	63600	0.30686275
18377	2.73127501	6.29E-05	0.36612937	0	9	5	FALSE	UBL7	165.6666667	9	0	0	0.71145416	up	FALSE	0	UBL7	112334	0.20480929
18387	2.49056604	0.00101631	0.40151515	0	19	5	FALSE	UCP2	133.8421053	19	0	0	0.75157233	up	FALSE	0	UCP2	493530	0.1301098
18407	3.30017153	3.91E-06	0.30301455	0	3	5	FALSE	UNC119B	124.3333333	3	0	0	0.61663808	down	FALSE	0	UNC119B	6336	0.38541667
18411	2.48770726	3.47E-04	0.40197656	0.05882353	18	5	FALSE	UNC13D	141.7777778	18	0	0	0.75204879	up	FALSE	0	UNC13D	325722	0.14555441
18430	2.45854774	5.81E-04	0.40674419	0	26	5	FALSE	UNC5C	130.7307692	26	0	0	0.75690871	down	FALSE	0	UNC5C	797136	0.12390713
18457	2.58490566	7.24E-05	0.38686131	0.10909091	11	5	FALSE	UNC5D	174	11	0	0	0.73584906	down	FALSE	0	UNC5D	178028	0.21305075
18469	2.67124071	1.69E-04	0.37435788	0.03896104	22	5	FALSE	UNC80	106.5909091	22	0	0	0.72145988	down	FALSE	0	UNC80	216590	0.1512774
18492	3.1189251	6.63E-06	0.32062328	0	3	5	FALSE	USH1C	188	3	0	0	0.64684582	down	FALSE	0	USH1C	10470	0.40128755
18496	2.89937107	1.06E-05	0.34490239	0	2	5	FALSE	USP51	360.5	2	0	0	0.68343816	down	FALSE	0	USP51	23078	0.56347962
18499	3.18696398	0	0.31377826	0	1	5	FALSE	UTY	414	1	0	0	0.635506	up	FALSE	0	UTY	0	0
18501	2.66037736	2.67E-05	0.37588652	0.06666667	6	4	FALSE	VAMP8	150.5	6	0	0	0.72327044	up	FALSE	0	VAMP8	27884	0.21937531
18508	2.57975986	1.10E-04	0.38763298	0.07575758	12	5	FALSE	VAV1	112.0833333	12	0	0	0.73670669	up	FALSE	0	VAV1	66852	0.13954944
18521	2.51057747	1.38E-04	0.39831473	0.04444444	10	5	FALSE	VGLL2	172.4	10	0	0	0.74823709	up	FALSE	0	VGLL2	159982	0.1832444
18532	2.53001715	3.70E-04	0.39525424	0.05	25	5	FALSE	VIT	83.36	25	0	0	0.74499714	down	FALSE	0	VIT	208650	0.09526437
18558	2.59748428	4.57E-04	0.38498789	0	23	5	FALSE	VLDLR	119.5217391	23	0	0	0.73375262	down	FALSE	0	VLDLR	456634	0.12785517
18582	3.71812464	0	0.26895279	0	1	5	FALSE	VNN1	56	1	0	0	0.54697923	up	FALSE	0	VNN1	0	0
18584	2.77472842	2.99E-05	0.36039563	0	3	5	FALSE	VNN2	327.6666667	3	0	0	0.70421193	up	FALSE	0	VNN2	53552	0.43039087
18588	2.8427673	5.19E-05	0.35176991	0.05555556	9	5	FALSE	VPREB3	89.66666667	9	0	0	0.69287212	up	FALSE	0	VPREB3	23376	0.16007194
18598	3.31675243	4.11E-06	0.30149974	0	5	5	FALSE	VTRNA1-1	108	5	0	0	0.6138746	down	FALSE	0	VTRNA1-1	5554	0.39483395
18604	3.09433962	1.89E-05	0.32317073	0	7	5	FALSE	VWC2	140	7	0	0	0.6509434	down	FALSE	0	VWC2	36292	0.29079498
18612	2.37793025	9.79E-04	0.42053378	0.02205882	17	5	FALSE	VWF	172.5294118	17	0	0	0.77034496	up	FALSE	0	VWF	630110	0.15377324
18630	2.43110349	4.73E-04	0.41133584	0.01904762	21	4	FALSE	WARS	114.6190476	21	0	0	0.76148275	up	FALSE	0	WARS	346504	0.11329069
18652	2.61063465	1.33E-04	0.38304862	0.02564103	13	5	FALSE	WAS	124.9230769	13	0	0	0.73156089	up	FALSE	0	WAS	151556	0.14762645
18666	2.73470555	8.41E-05	0.36567008	0.04395604	14	5	FALSE	WDFY3-AS2	73.92857143	14	0	0	0.71088241	down	FALSE	0	WDFY3-AS2	52844	0.13801453
18681	2.50485992	1.21E-04	0.39922392	0	6	5	FALSE	WDFY4	342.8333333	6	0	0	0.74919001	up	FALSE	0	WDFY4	267738	0.33945713
18688	3.24757004	4.24E-06	0.30792254	0	2	5	FALSE	WDR72	198.5	2	0	0	0.62540499	down	FALSE	0	WDR72	8420	0.54258242
18691	2.79016581	3.11E-05	0.35840164	0	4	5	FALSE	WDR96	277	4	0	0	0.70163903	down	FALSE	0	WDR96	56654	0.36947791
18696	2.68210406	6.71E-05	0.37284161	0	9	5	FALSE	WIPF3	205.4444444	9	0	0	0.71964932	down	FALSE	0	WIPF3	142920	0.24280813
18706	2.50714694	3.55E-04	0.39885975	0	17	5	FALSE	WNT11	145.6470588	17	0	0	0.74880884	down	FALSE	0	WNT11	413812	0.14407078
18753	2.84676958	1.92E-05	0.35127536	0	3	5	FALSE	XCR1	295.6666667	3	0	0	0.69220507	up	FALSE	0	XCR1	41318	0.419156
18757	3.51000572	0	0.28489982	0	2	5	FALSE	XKR9	162.5	2	0	0	0.58166571	down	FALSE	0	XKR9	2	0.99079755
18760	2.39679817	9.89E-04	0.41722328	0.07843137	18	4	FALSE	XYLT1	143.0555556	18	0	0	0.7672003	down	FALSE	0	XYLT1	357712	0.13224078
18779	2.79302459	3.44E-05	0.3580348	0	4	5	FALSE	ZBP1	291.75	4	0	0	0.70116257	up	FALSE	0	ZBP1	70412	0.38870321
18784	2.74442539	3.40E-04	0.364375	0	29	5	FALSE	ZBTB42	97.17241379	29	0	0	0.70926244	down	FALSE	0	ZBTB42	390160	0.12298263
18814	2.66723842	7.89E-05	0.37491961	0	9	5	FALSE	ZCCHC4	198.5555556	9	0	0	0.72212693	down	FALSE	0	ZCCHC4	149974	0.22918278
18841	2.72441395	8.15E-05	0.36705142	0	10	5	FALSE	ZKSCAN2	150.2	10	0	0	0.71259767	up	FALSE	0	ZKSCAN2	109532	0.18442522
18852	2.56089194	1.14E-04	0.39048895	0.0989011	14	5	FALSE	ZNF142	130.7142857	14	0	0	0.73985134	up	FALSE	0	ZNF142	128242	0.15869149
18867	2.29959977	0.0011426	0.43485828	0.06031746	36	5	FALSE	ZNF385A	131.6388889	36	0	0	0.78340004	up	FALSE	0	ZNF385A	1129810	0.10714286
18904	3.03373356	1.08E-05	0.32962684	0	3	5	FALSE	ZNF385D	207	3	0	0	0.66104441	up	FALSE	0	ZNF385D	14570	0.39312977
18908	3.05546026	0	0.32728293	0	1	5	FALSE	ZNF491	508	1	0	0	0.65742329	up	FALSE	0	ZNF491	0	0
18910	2.91538022	9.18E-06	0.34300843	0	3	5	FALSE	ZNF607	258.3333333	3	0	0	0.68076996	down	FALSE	0	ZNF607	20262	0.40652975
18914	2.63007433	6.04E-05	0.38021739	0	6	5	FALSE	ZNF688	284.3333333	6	0	0	0.72832095	down	FALSE	0	ZNF688	137184	0.31799476
18921	2.6700972	1.19E-04	0.3745182	0	10	5	FALSE	ZNF704	158.8	10	0	0	0.72165047	down	FALSE	0	ZNF704	189774	0.18348837
18932	2.59291023	2.50E-04	0.38566703	0.03952569	23	4	FALSE	ZNF711	91.34782609	23	0	0	0.73451496	down	FALSE	0	ZNF711	227346	0.12136712
