# Supplementary material for: The Genetic and Epigenetic Mechanisms Involved in Irreversible Pulp Neural Inflammation
Source: Dis Markers. 2021 Mar 8;2021:8831948. doi: 10.1155/2021/8831948 (PMC7968449; doi:10.1155/2021/8831948)
Supplement: Supplementary 4 — File S4: the topological characteristics of all DEG nodes in the PPI network for the significant blue module of GSE77459 dataset. [file 8831948.f4.txt]

SUID	AverageShortestPathLength	BetweennessCentrality	ClosenessCentrality	ClusteringCoefficient	Degree	Eccentricity	IsSingleNode	name	NeighborhoodConnectivity	NumberOfDirectedEdges	NumberOfUndirectedEdges	PartnerOfMultiEdgedNodePairs	Radiality	regulate	selected	SelfLoops	shared name	Stress	TopologicalCoefficient
20350	3.51914414	0.07839935	0.28416	0	38	7	FALSE	ASB3	1.42105263	38	0	0	0.74808559		FALSE	0	ASB3	375244	0.03827751
20351	4.51801802	0	0.22133599	0	1	8	FALSE	RPL38	38	1	0	0	0.6481982		FALSE	0	RPL38	0	0
20353	4.51801802	0	0.22133599	0	1	8	FALSE	SRP14	38	1	0	0	0.6481982		FALSE	0	SRP14	0	0
20355	4.51801802	0	0.22133599	0	1	8	FALSE	NONO	38	1	0	0	0.6481982		FALSE	0	NONO	0	0
20357	4.51801802	0	0.22133599	0	1	8	FALSE	ATP5F1	38	1	0	0	0.6481982		FALSE	0	ATP5F1	0	0
20359	4.51801802	0	0.22133599	0	1	8	FALSE	DNPEP	38	1	0	0	0.6481982		FALSE	0	DNPEP	0	0
20361	4.51801802	0	0.22133599	0	1	8	FALSE	EPB41L3	38	1	0	0	0.6481982		FALSE	0	EPB41L3	0	0
20363	4.51801802	0	0.22133599	0	1	8	FALSE	SFPQ	38	1	0	0	0.6481982		FALSE	0	SFPQ	0	0
20365	4.51801802	0	0.22133599	0	1	8	FALSE	TCEB2	38	1	0	0	0.6481982		FALSE	0	TCEB2	0	0
20367	4.51801802	0	0.22133599	0	1	8	FALSE	PRDX6	38	1	0	0	0.6481982		FALSE	0	PRDX6	0	0
20369	4.51801802	0	0.22133599	0	1	8	FALSE	TCEB1	38	1	0	0	0.6481982		FALSE	0	TCEB1	0	0
20371	3.69369369	0.02492874	0.27073171	0	4	8	FALSE	HSP90AB1	51.5	4	0	0	0.73063063		FALSE	0	HSP90AB1	136934	0.25634518
20373	4.51801802	0	0.22133599	0	1	8	FALSE	AGL	38	1	0	0	0.6481982		FALSE	0	AGL	0	0
20375	4.51801802	0	0.22133599	0	1	8	FALSE	S100A8	38	1	0	0	0.6481982	mRNAup	FALSE	0	S100A8	0	0
20377	4.51801802	0	0.22133599	0	1	8	FALSE	RPS27	38	1	0	0	0.6481982		FALSE	0	RPS27	0	0
20379	4.51801802	0	0.22133599	0	1	8	FALSE	SLC4A1AP	38	1	0	0	0.6481982		FALSE	0	SLC4A1AP	0	0
20381	3.89864865	0.00646009	0.25649913	0	2	8	FALSE	THRAP3	60.5	2	0	0	0.71013514		FALSE	0	THRAP3	60042	0.50423729
20383	4.51801802	0	0.22133599	0	1	8	FALSE	PRMT6	38	1	0	0	0.6481982		FALSE	0	PRMT6	0	0
20385	4.51801802	0	0.22133599	0	1	8	FALSE	ERH	38	1	0	0	0.6481982		FALSE	0	ERH	0	0
20387	4.51801802	0	0.22133599	0	1	8	FALSE	CUL5	38	1	0	0	0.6481982		FALSE	0	CUL5	0	0
20389	4.51801802	0	0.22133599	0	1	8	FALSE	ZAP70	38	1	0	0	0.6481982		FALSE	0	ZAP70	0	0
20391	4.51801802	0	0.22133599	0	1	8	FALSE	CLASP2	38	1	0	0	0.6481982		FALSE	0	CLASP2	0	0
20393	4.51801802	0	0.22133599	0	1	8	FALSE	S100A9	38	1	0	0	0.6481982	mRNAup	FALSE	0	S100A9	0	0
20395	4.51801802	0	0.22133599	0	1	8	FALSE	BCLAF1	38	1	0	0	0.6481982		FALSE	0	BCLAF1	0	0
20397	3.38063063	0.06186811	0.2958028	0	5	8	FALSE	NRF1	69.2	5	0	0	0.76193694		FALSE	0	NRF1	261306	0.20358209
20399	4.51801802	0	0.22133599	0	1	8	FALSE	SLC25A5	38	1	0	0	0.6481982		FALSE	0	SLC25A5	0	0
20401	4.51801802	0	0.22133599	0	1	8	FALSE	PGAM5	38	1	0	0	0.6481982		FALSE	0	PGAM5	0	0
20403	3.89864865	0.00646009	0.25649913	0	2	8	FALSE	KDM1A	60.5	2	0	0	0.71013514		FALSE	0	KDM1A	60042	0.50423729
20405	4.21621622	0.00570454	0.23717949	0	2	8	FALSE	ATP5C1	56	2	0	0	0.67837838		FALSE	0	ATP5C1	43372	0.50458716
20407	4.51801802	0	0.22133599	0	1	8	FALSE	RCN2	38	1	0	0	0.6481982		FALSE	0	RCN2	0	0
20409	4.7713964	0.01125727	0.20958225	0	7	7	FALSE	ATP6V0B	1.42857143	7	0	0	0.62286036		FALSE	0	ATP6V0B	56280	0.21428571
20410	5.77027027	0	0.17330211	0	1	8	FALSE	YWHAG	7	1	0	0	0.52297297		FALSE	0	YWHAG	0	0
20412	5.77027027	0	0.17330211	0	1	8	FALSE	IRAK3	7	1	0	0	0.52297297		FALSE	0	IRAK3	0	0
20414	5.77027027	0	0.17330211	0	1	8	FALSE	FAS	7	1	0	0	0.52297297		FALSE	0	FAS	0	0
20416	3.0731982	0.18704239	0.32539392	0	82	7	FALSE	BCAR1	1.47560976	82	0	0	0.79268018		FALSE	0	BCAR1	882568	0.02264808
20417	4.07207207	0	0.24557522	0	1	8	FALSE	TSEN34	82	1	0	0	0.69279279		FALSE	0	TSEN34	0	0
20419	4.07207207	0	0.24557522	0	1	8	FALSE	TNS1	82	1	0	0	0.69279279		FALSE	0	TNS1	0	0
20421	2.51351351	0.42421401	0.39784946	0	18	6	FALSE	UBC	39	18	0	0	0.84864865		FALSE	0	UBC	1536256	0.06050955
20423	4.07207207	0	0.24557522	0	1	8	FALSE	RAN	82	1	0	0	0.69279279		FALSE	0	RAN	0	0
20425	4.07207207	0	0.24557522	0	1	8	FALSE	BMX	82	1	0	0	0.69279279		FALSE	0	BMX	0	0
20427	4.07207207	0	0.24557522	0	1	8	FALSE	MMP14	82	1	0	0	0.69279279		FALSE	0	MMP14	0	0
20429	4.07207207	0	0.24557522	0	1	8	FALSE	EFS	82	1	0	0	0.69279279		FALSE	0	EFS	0	0
20431	4.02927928	0.00137389	0.24818334	0	2	8	FALSE	INPPL1	51.5	2	0	0	0.69707207		FALSE	0	INPPL1	4784	0.51010101
20433	4.07207207	0	0.24557522	0	1	8	FALSE	TRIP6	82	1	0	0	0.69279279		FALSE	0	TRIP6	0	0
20435	4.07207207	0	0.24557522	0	1	8	FALSE	KIF13A	82	1	0	0	0.69279279		FALSE	0	KIF13A	0	0
20437	4.07207207	0	0.24557522	0	1	8	FALSE	VCL	82	1	0	0	0.69279279		FALSE	0	VCL	0	0
20439	4.07207207	0	0.24557522	0	1	8	FALSE	SH2D3C	82	1	0	0	0.69279279		FALSE	0	SH2D3C	0	0
20441	4.07207207	0	0.24557522	0	1	8	FALSE	LCK	82	1	0	0	0.69279279		FALSE	0	LCK	0	0
20443	4.07207207	0	0.24557522	0	1	8	FALSE	PIK3R1	82	1	0	0	0.69279279		FALSE	0	PIK3R1	0	0
20445	4.07207207	0	0.24557522	0	1	8	FALSE	NCK1	82	1	0	0	0.69279279		FALSE	0	NCK1	0	0
20447	4.07207207	0	0.24557522	0	1	8	FALSE	GMPR2	82	1	0	0	0.69279279		FALSE	0	GMPR2	0	0
20449	4.07207207	0	0.24557522	0	1	8	FALSE	HCK	82	1	0	0	0.69279279	mRNAup	FALSE	0	HCK	0	0
20451	4.07207207	0	0.24557522	0	1	8	FALSE	ARMCX3	82	1	0	0	0.69279279		FALSE	0	ARMCX3	0	0
20453	4.07207207	0	0.24557522	0	1	8	FALSE	CRKL	82	1	0	0	0.69279279		FALSE	0	CRKL	0	0
20455	4.07207207	0	0.24557522	0	1	8	FALSE	DOCK1	82	1	0	0	0.69279279		FALSE	0	DOCK1	0	0
20457	3.79504505	0.00931913	0.26350148	0	2	8	FALSE	GRB2	82.5	2	0	0	0.7204955		FALSE	0	GRB2	68740	0.50308642
20459	4.07207207	0	0.24557522	0	1	8	FALSE	VPS11	82	1	0	0	0.69279279		FALSE	0	VPS11	0	0
20461	4.07207207	0	0.24557522	0	1	8	FALSE	PTK2B	82	1	0	0	0.69279279		FALSE	0	PTK2B	0	0
20463	4.07207207	0	0.24557522	0	1	8	FALSE	PTPN11	82	1	0	0	0.69279279		FALSE	0	PTPN11	0	0
20465	4.07207207	0	0.24557522	0	1	8	FALSE	PPP1R15A	82	1	0	0	0.69279279		FALSE	0	PPP1R15A	0	0
20467	4.07207207	0	0.24557522	0	1	8	FALSE	CBL	82	1	0	0	0.69279279		FALSE	0	CBL	0	0
20469	4.07207207	0	0.24557522	0	1	8	FALSE	FES	82	1	0	0	0.69279279		FALSE	0	FES	0	0
20471	4.07207207	0	0.24557522	0	1	8	FALSE	LYN	82	1	0	0	0.69279279	mRNAup	FALSE	0	LYN	0	0
20473	4.07207207	0	0.24557522	0	1	8	FALSE	PTPRH	82	1	0	0	0.69279279		FALSE	0	PTPRH	0	0
20475	4.07207207	0	0.24557522	0	1	8	FALSE	PTPN1	82	1	0	0	0.69279279		FALSE	0	PTPN1	0	0
20477	4.07207207	0	0.24557522	0	1	8	FALSE	ARHGAP32	82	1	0	0	0.69279279		FALSE	0	ARHGAP32	0	0
20479	4.07207207	0	0.24557522	0	1	8	FALSE	PTPRF	82	1	0	0	0.69279279		FALSE	0	PTPRF	0	0
20481	4.07207207	0	0.24557522	0	1	8	FALSE	CSPG4	82	1	0	0	0.69279279		FALSE	0	CSPG4	0	0
20483	4.07207207	0	0.24557522	0	1	8	FALSE	ABL1	82	1	0	0	0.69279279		FALSE	0	ABL1	0	0
20485	3.83783784	0.01085316	0.26056338	0	3	8	FALSE	EGFR	50.66666667	3	0	0	0.71621622		FALSE	0	EGFR	70242	0.33786848
20487	4.07207207	0	0.24557522	0	1	8	FALSE	FYN	82	1	0	0	0.69279279		FALSE	0	FYN	0	0
20489	4.07207207	0	0.24557522	0	1	8	FALSE	PXN	82	1	0	0	0.69279279		FALSE	0	PXN	0	0
20491	4.07207207	0	0.24557522	0	1	8	FALSE	PTPN12	82	1	0	0	0.69279279		FALSE	0	PTPN12	0	0
20493	4.07207207	0	0.24557522	0	1	8	FALSE	PKD1	82	1	0	0	0.69279279		FALSE	0	PKD1	0	0
20495	4.07207207	0	0.24557522	0	1	8	FALSE	FXYD6	82	1	0	0	0.69279279		FALSE	0	FXYD6	0	0
20497	4.07207207	0	0.24557522	0	1	8	FALSE	FYB	82	1	0	0	0.69279279	mRNAup	FALSE	0	FYB	0	0
20499	4.07207207	0	0.24557522	0	1	8	FALSE	PEAK1	82	1	0	0	0.69279279		FALSE	0	PEAK1	0	0
20501	4.07207207	0	0.24557522	0	1	8	FALSE	RAPGEF1	82	1	0	0	0.69279279		FALSE	0	RAPGEF1	0	0
20503	4.07207207	0	0.24557522	0	1	8	FALSE	GSN	82	1	0	0	0.69279279		FALSE	0	GSN	0	0
20505	3.4786036	0.02550435	0.28747167	0	16	7	FALSE	BCORL1	2.4375	16	0	0	0.75213964		FALSE	0	BCORL1	88844	0.08455882
20507	4.47747748	0	0.22334004	0	1	8	FALSE	HDAC7	16	1	0	0	0.65225225		FALSE	0	HDAC7	0	0
20509	4.47747748	0	0.22334004	0	1	8	FALSE	HDAC5	16	1	0	0	0.65225225		FALSE	0	HDAC5	0	0
20511	4.47747748	0	0.22334004	0	1	8	FALSE	HDAC4	16	1	0	0	0.65225225		FALSE	0	HDAC4	0	0
20513	4.06306306	0.00272538	0.24611973	0	3	8	FALSE	SUMO2	41.66666667	3	0	0	0.69369369		FALSE	0	SUMO2	12180	0.34757835
20515	4.71509009	0.00958226	0.21208503	0	8	9	FALSE	CCDC69	1.875	8	0	0	0.62849099		FALSE	0	CCDC69	65384	0.29166667
20516	5.71396396	0	0.17500985	0	1	10	FALSE	MLTK	8	1	0	0	0.5286036		FALSE	0	MLTK	0	0
20518	1	1	1	0	8	1	FALSE	CD200R1	1	8	0	0	1		FALSE	0	CD200R1	56	0
20519	1.875	0	0.53333333	0	1	2	FALSE	CD200	8	1	0	0	0.5625		FALSE	0	CD200	0	0
20521	1.875	0	0.53333333	0	1	2	FALSE	TNPO2	8	1	0	0	0.5625		FALSE	0	TNPO2	0	0
20523	1.875	0	0.53333333	0	1	2	FALSE	POMT2	8	1	0	0	0.5625		FALSE	0	POMT2	0	0
20525	1.875	0	0.53333333	0	1	2	FALSE	TCP10L2	8	1	0	0	0.5625		FALSE	0	TCP10L2	0	0
20527	1.875	0	0.53333333	0	1	2	FALSE	MBOAT7	8	1	0	0	0.5625		FALSE	0	MBOAT7	0	0
20529	1.875	0	0.53333333	0	1	2	FALSE	NCR3LG1	8	1	0	0	0.5625		FALSE	0	NCR3LG1	0	0
20531	1.875	0	0.53333333	0	1	2	FALSE	COL1A1	8	1	0	0	0.5625		FALSE	0	COL1A1	0	0
20533	1.875	0	0.53333333	0	1	2	FALSE	FUT8	8	1	0	0	0.5625		FALSE	0	FUT8	0	0
20535	3.49436937	0.01078561	0.28617467	0	9	7	FALSE	DFNA5	3.77777778	9	0	0	0.75056306		FALSE	0	DFNA5	50308	0.16339869
20536	4.49324324	0	0.22255639	0	1	8	FALSE	BIRC6	9	1	0	0	0.65067568		FALSE	0	BIRC6	0	0
20538	4.49324324	0	0.22255639	0	1	8	FALSE	PTN	9	1	0	0	0.65067568		FALSE	0	PTN	0	0
20540	4.49324324	0	0.22255639	0	1	8	FALSE	ITGB1BP1	9	1	0	0	0.65067568		FALSE	0	ITGB1BP1	0	0
20542	3.37274775	0.05414526	0.29649416	0	32	7	FALSE	DGCR14	1.9375	32	0	0	0.76272523		FALSE	0	DGCR14	251476	0.05208333
20543	4.37162162	0	0.22874807	0	1	8	FALSE	WNK2	32	1	0	0	0.66283784		FALSE	0	WNK2	0	0
20545	4.37162162	0	0.22874807	0	1	8	FALSE	TCTE1	32	1	0	0	0.66283784		FALSE	0	TCTE1	0	0
20547	3.85810811	0.004947	0.2591944	0	3	8	FALSE	GNB2L1	47.66666667	3	0	0	0.71418919		FALSE	0	GNB2L1	36804	0.35087719
20549	4.37162162	0	0.22874807	0	1	8	FALSE	RBM4	32	1	0	0	0.66283784		FALSE	0	RBM4	0	0
20551	4.37162162	0	0.22874807	0	1	8	FALSE	PTBP3	32	1	0	0	0.66283784		FALSE	0	PTBP3	0	0
20553	4.08783784	8.24E-04	0.2446281	0	2	8	FALSE	TTC14	57.5	2	0	0	0.69121622		FALSE	0	TTC14	7762	0.52803738
20556	3.50337838	0.00899377	0.28543877	0	5	7	FALSE	DOCK10	4.4	5	0	0	0.74966216		FALSE	0	DOCK10	19612	0.2
20557	4.50225225	0	0.22211106	0	1	8	FALSE	C1orf190	5	1	0	0	0.64977477		FALSE	0	C1orf190	0	0
20560	4.50225225	0	0.22211106	0	1	8	FALSE	RHOJ	5	1	0	0	0.64977477		FALSE	0	RHOJ	0	0
20562	4.50225225	0	0.22211106	0	1	8	FALSE	LURAP1	5	1	0	0	0.64977477		FALSE	0	LURAP1	0	0
20564	3.3704955	0.04976931	0.29669228	0	26	7	FALSE	DUS3L	2.07692308	26	0	0	0.76295045		FALSE	0	DUS3L	177204	0.05668016
20565	4.36936937	0	0.22886598	0	1	8	FALSE	BCAT1	26	1	0	0	0.66306306	mRNAup	FALSE	0	BCAT1	0	0
20567	4.36936937	0	0.22886598	0	1	8	FALSE	SNF8	26	1	0	0	0.66306306		FALSE	0	SNF8	0	0
20569	3.81081081	0.01293539	0.26241135	0	5	8	FALSE	APP	30.4	5	0	0	0.71891892		FALSE	0	APP	79974	0.20851064
20571	4.36936937	0	0.22886598	0	1	8	FALSE	GTF2F1	26	1	0	0	0.66306306		FALSE	0	GTF2F1	0	0
20573	4.36936937	0	0.22886598	0	1	8	FALSE	PRKAR1B	26	1	0	0	0.66306306		FALSE	0	PRKAR1B	0	0
20576	4.36936937	0	0.22886598	0	1	8	FALSE	CALU	26	1	0	0	0.66306306		FALSE	0	CALU	0	0
20579	4.36936937	0	0.22886598	0	1	8	FALSE	EIF2A	26	1	0	0	0.66306306		FALSE	0	EIF2A	0	0
20581	4.36936937	0	0.22886598	0	1	8	FALSE	SEC23A	26	1	0	0	0.66306306		FALSE	0	SEC23A	0	0
20583	4.36936937	0	0.22886598	0	1	8	FALSE	SARS	26	1	0	0	0.66306306		FALSE	0	SARS	0	0
20585	4.36936937	0	0.22886598	0	1	8	FALSE	XPO5	26	1	0	0	0.66306306		FALSE	0	XPO5	0	0
20587	4.36936937	0	0.22886598	0	1	8	FALSE	CDC37	26	1	0	0	0.66306306		FALSE	0	CDC37	0	0
20589	4.36936937	0	0.22886598	0	1	8	FALSE	TRMT6	26	1	0	0	0.66306306		FALSE	0	TRMT6	0	0
20591	4.36936937	0	0.22886598	0	1	8	FALSE	RPRD1B	26	1	0	0	0.66306306		FALSE	0	RPRD1B	0	0
20593	4.36936937	0	0.22886598	0	1	8	FALSE	DPP9	26	1	0	0	0.66306306	mRNAup	FALSE	0	DPP9	0	0
20595	4.09459459	0.00128616	0.24422442	0	2	8	FALSE	EFTUD2	54.5	2	0	0	0.69054054		FALSE	0	EFTUD2	5526	0.51442308
20597	4.36936937	0	0.22886598	0	1	8	FALSE	SERPINE2	26	1	0	0	0.66306306		FALSE	0	SERPINE2	0	0
20600	3.31644144	0.11672478	0.30152801	0	55	7	FALSE	ERGIC3	1.38181818	55	0	0	0.76835586		FALSE	0	ERGIC3	323724	0.02121212
20601	4.31531532	0	0.23173278	0	1	8	FALSE	ERGIC1	55	1	0	0	0.66846847		FALSE	0	ERGIC1	0	0
20603	4.31531532	0	0.23173278	0	1	8	FALSE	EXT1	55	1	0	0	0.66846847		FALSE	0	EXT1	0	0
20605	4.31531532	0	0.23173278	0	1	8	FALSE	ABCB6	55	1	0	0	0.66846847		FALSE	0	ABCB6	0	0
20607	4.31531532	0	0.23173278	0	1	8	FALSE	ERGIC2	55	1	0	0	0.66846847		FALSE	0	ERGIC2	0	0
20609	4.31531532	0	0.23173278	0	1	8	FALSE	WRB	55	1	0	0	0.66846847		FALSE	0	WRB	0	0
20611	4.31531532	0	0.23173278	0	1	8	FALSE	BDH1	55	1	0	0	0.66846847		FALSE	0	BDH1	0	0
20613	4.31531532	0	0.23173278	0	1	8	FALSE	PXMP2	55	1	0	0	0.66846847		FALSE	0	PXMP2	0	0
20615	4.31531532	0	0.23173278	0	1	8	FALSE	ALG3	55	1	0	0	0.66846847		FALSE	0	ALG3	0	0
20617	4.31531532	0	0.23173278	0	1	8	FALSE	TMEM186	55	1	0	0	0.66846847		FALSE	0	TMEM186	0	0
20619	4.31531532	0	0.23173278	0	1	8	FALSE	ANKRD13D	55	1	0	0	0.66846847		FALSE	0	ANKRD13D	0	0
20621	4.31531532	0	0.23173278	0	1	8	FALSE	YIPF3	55	1	0	0	0.66846847		FALSE	0	YIPF3	0	0
20623	4.31531532	0	0.23173278	0	1	8	FALSE	ANKRD13A	55	1	0	0	0.66846847		FALSE	0	ANKRD13A	0	0
20625	4.31531532	0	0.23173278	0	1	8	FALSE	SGPP1	55	1	0	0	0.66846847		FALSE	0	SGPP1	0	0
20627	4.31531532	0	0.23173278	0	1	8	FALSE	SLC16A13	55	1	0	0	0.66846847		FALSE	0	SLC16A13	0	0
20629	4.31531532	0	0.23173278	0	1	8	FALSE	AGPAT6	55	1	0	0	0.66846847		FALSE	0	AGPAT6	0	0
20631	4.31531532	0	0.23173278	0	1	8	FALSE	SFXN5	55	1	0	0	0.66846847		FALSE	0	SFXN5	0	0
20633	4.31531532	0	0.23173278	0	1	8	FALSE	FAR2	55	1	0	0	0.66846847		FALSE	0	FAR2	0	0
20635	4.31531532	0	0.23173278	0	1	8	FALSE	PTPMT1	55	1	0	0	0.66846847		FALSE	0	PTPMT1	0	0
20637	4.31531532	0	0.23173278	0	1	8	FALSE	TMEM192	55	1	0	0	0.66846847		FALSE	0	TMEM192	0	0
20639	4.31531532	0	0.23173278	0	1	8	FALSE	MTFP1	55	1	0	0	0.66846847		FALSE	0	MTFP1	0	0
20641	4.31531532	0	0.23173278	0	1	8	FALSE	MFAP3	55	1	0	0	0.66846847		FALSE	0	MFAP3	0	0
20643	4.31531532	0	0.23173278	0	1	8	FALSE	SLC26A2	55	1	0	0	0.66846847		FALSE	0	SLC26A2	0	0
20645	4.31531532	0	0.23173278	0	1	8	FALSE	VMP1	55	1	0	0	0.66846847		FALSE	0	VMP1	0	0
20647	4.31531532	0	0.23173278	0	1	8	FALSE	ARV1	55	1	0	0	0.66846847		FALSE	0	ARV1	0	0
20649	4.31531532	0	0.23173278	0	1	8	FALSE	SLC25A17	55	1	0	0	0.66846847		FALSE	0	SLC25A17	0	0
20651	4.31531532	0	0.23173278	0	1	8	FALSE	CLPTM1	55	1	0	0	0.66846847		FALSE	0	CLPTM1	0	0
20653	4.31531532	0	0.23173278	0	1	8	FALSE	PARL	55	1	0	0	0.66846847		FALSE	0	PARL	0	0
20655	4.31531532	0	0.23173278	0	1	8	FALSE	STOM	55	1	0	0	0.66846847		FALSE	0	STOM	0	0
20657	4.31531532	0	0.23173278	0	1	8	FALSE	DNAJC11	55	1	0	0	0.66846847		FALSE	0	DNAJC11	0	0
20660	4.31531532	0	0.23173278	0	1	8	FALSE	COX16	55	1	0	0	0.66846847		FALSE	0	COX16	0	0
20662	4.31531532	0	0.23173278	0	1	8	FALSE	CHPT1	55	1	0	0	0.66846847		FALSE	0	CHPT1	0	0
20664	4.31531532	0	0.23173278	0	1	8	FALSE	NR2F2	55	1	0	0	0.66846847		FALSE	0	NR2F2	0	0
20666	4.31531532	0	0.23173278	0	1	8	FALSE	SLC38A10	55	1	0	0	0.66846847		FALSE	0	SLC38A10	0	0
20668	4.31531532	0	0.23173278	0	1	8	FALSE	FLVCR1	55	1	0	0	0.66846847		FALSE	0	FLVCR1	0	0
20670	4.31531532	0	0.23173278	0	1	8	FALSE	LMBRD2	55	1	0	0	0.66846847		FALSE	0	LMBRD2	0	0
20672	4.31531532	0	0.23173278	0	1	8	FALSE	GK	55	1	0	0	0.66846847	mRNAup	FALSE	0	GK	0	0
20674	4.31531532	0	0.23173278	0	1	8	FALSE	PSEN2	55	1	0	0	0.66846847		FALSE	0	PSEN2	0	0
20676	4.31531532	0	0.23173278	0	1	8	FALSE	TMEM184B	55	1	0	0	0.66846847		FALSE	0	TMEM184B	0	0
20678	4.31531532	0	0.23173278	0	1	8	FALSE	TMEM223	55	1	0	0	0.66846847		FALSE	0	TMEM223	0	0
20680	4.31531532	0	0.23173278	0	1	8	FALSE	BSCL2	55	1	0	0	0.66846847		FALSE	0	BSCL2	0	0
20682	4.31531532	0	0.23173278	0	1	8	FALSE	SLC25A46	55	1	0	0	0.66846847		FALSE	0	SLC25A46	0	0
20684	4.31531532	0	0.23173278	0	1	8	FALSE	PIGU	55	1	0	0	0.66846847		FALSE	0	PIGU	0	0
20686	4.31531532	0	0.23173278	0	1	8	FALSE	SLC30A9	55	1	0	0	0.66846847		FALSE	0	SLC30A9	0	0
20688	4.31531532	0	0.23173278	0	1	8	FALSE	RER1	55	1	0	0	0.66846847		FALSE	0	RER1	0	0
20690	4.31531532	0	0.23173278	0	1	8	FALSE	TMEM246	55	1	0	0	0.66846847		FALSE	0	TMEM246	0	0
20692	4.31531532	0	0.23173278	0	1	8	FALSE	TMEM87A	55	1	0	0	0.66846847		FALSE	0	TMEM87A	0	0
20694	4.31531532	0	0.23173278	0	1	8	FALSE	DOLK	55	1	0	0	0.66846847		FALSE	0	DOLK	0	0
20696	4.31531532	0	0.23173278	0	1	8	FALSE	STARD3	55	1	0	0	0.66846847		FALSE	0	STARD3	0	0
20698	4.31531532	0	0.23173278	0	1	8	FALSE	PAM16	55	1	0	0	0.66846847		FALSE	0	PAM16	0	0
20700	4.31531532	0	0.23173278	0	1	8	FALSE	ATP1A3	55	1	0	0	0.66846847		FALSE	0	ATP1A3	0	0
20702	4.31531532	0	0.23173278	0	1	8	FALSE	NDC1	55	1	0	0	0.66846847		FALSE	0	NDC1	0	0
20705	4.65427928	0.0262998	0.21485604	0	25	7	FALSE	FAM74A6	2.16	25	0	0	0.63457207		FALSE	0	FAM74A6	214886	0.19333333
20706	5.64414414	1.15E-06	0.17717478	0	2	8	FALSE	IKZF1	25.5	2	0	0	0.53558559	mRNAup	FALSE	0	IKZF1	22	0.90740741
20708	5.64414414	1.15E-06	0.17717478	0	2	8	FALSE	KRTAP10-9	25.5	2	0	0	0.53558559		FALSE	0	KRTAP10-9	22	0.90740741
20710	5.64414414	1.15E-06	0.17717478	0	2	8	FALSE	KRTAP5-9	25.5	2	0	0	0.53558559		FALSE	0	KRTAP5-9	22	0.90740741
20712	5.64414414	1.15E-06	0.17717478	0	2	8	FALSE	CCDC85B	25.5	2	0	0	0.53558559		FALSE	0	CCDC85B	22	0.90740741
20714	5.64414414	1.15E-06	0.17717478	0	2	8	FALSE	STX11	25.5	2	0	0	0.53558559		FALSE	0	STX11	22	0.90740741
20716	5.64414414	1.15E-06	0.17717478	0	2	8	FALSE	KRT31	25.5	2	0	0	0.53558559		FALSE	0	KRT31	22	0.90740741
20718	3.80855856	0.03029947	0.26256653	0	3	6	FALSE	TCF4	42.66666667	3	0	0	0.71914414		FALSE	0	TCF4	219438	0.40453074
20720	5.64414414	1.15E-06	0.17717478	0	2	8	FALSE	KRTAP10-5	25.5	2	0	0	0.53558559		FALSE	0	KRTAP10-5	22	0.90740741
20722	4.29279279	0.0066813	0.23294858	0	3	6	FALSE	A4D127	11.66666667	3	0	0	0.67072072		FALSE	0	A4D127	45498	0.34408602
20724	5.55405405	0.0063633	0.18004866	0	3	8	FALSE	CCNDBP1	18.66666667	3	0	0	0.54459459		FALSE	0	CCNDBP1	63046	0.56989247
20726	5.64414414	1.15E-06	0.17717478	0	2	8	FALSE	EFEMP2	25.5	2	0	0	0.53558559		FALSE	0	EFEMP2	22	0.90740741
20728	5.64414414	1.15E-06	0.17717478	0	2	8	FALSE	MTUS2	25.5	2	0	0	0.53558559		FALSE	0	MTUS2	22	0.90740741
20730	4.65990991	0.00626393	0.21459642	0	3	8	FALSE	KRTAP10-8	28.66666667	3	0	0	0.63400901		FALSE	0	KRTAP10-8	70368	0.46892655
20732	5.64414414	1.15E-06	0.17717478	0	2	8	FALSE	KRTAP10-7	25.5	2	0	0	0.53558559		FALSE	0	KRTAP10-7	22	0.90740741
20734	5.19256757	0.00225225	0.19258295	0	2	9	FALSE	GPR125	1.5	2	0	0	0.58074324		FALSE	0	GPR125	4302	0.5
20735	4.19594595	0.00449943	0.23832528	0	2	8	FALSE	DLG1	12.5	2	0	0	0.68040541		FALSE	0	DLG1	8600	0.5
20737	3.14752252	0.16898579	0.3177102	0	83	7	FALSE	IK	1.57831325	83	0	0	0.78524775	mRNAdown	FALSE	0	IK	903848	0.02628697
20738	4.1463964	0	0.24117328	0	1	8	FALSE	SRSF10	83	1	0	0	0.68536036		FALSE	0	SRSF10	0	0
20740	4.1463964	0	0.24117328	0	1	8	FALSE	TRA2A	83	1	0	0	0.68536036		FALSE	0	TRA2A	0	0
20742	4.1463964	0	0.24117328	0	1	8	FALSE	SUPT16H	83	1	0	0	0.68536036		FALSE	0	SUPT16H	0	0
20744	4.1463964	0	0.24117328	0	1	8	FALSE	ZCCHC10	83	1	0	0	0.68536036		FALSE	0	ZCCHC10	0	0
20746	4.1463964	0	0.24117328	0	1	8	FALSE	NUP62	83	1	0	0	0.68536036		FALSE	0	NUP62	0	0
20748	4.1463964	0	0.24117328	0	1	8	FALSE	PHGDH	83	1	0	0	0.68536036	mRNAdown	FALSE	0	PHGDH	0	0
20750	4.1463964	0	0.24117328	0	1	8	FALSE	SRSF7	83	1	0	0	0.68536036		FALSE	0	SRSF7	0	0
20752	4.1463964	0	0.24117328	0	1	8	FALSE	SRSF3	83	1	0	0	0.68536036		FALSE	0	SRSF3	0	0
20754	4.1463964	0	0.24117328	0	1	8	FALSE	SUPT5H	83	1	0	0	0.68536036		FALSE	0	SUPT5H	0	0
20756	4.1463964	0	0.24117328	0	1	8	FALSE	ZNF830	83	1	0	0	0.68536036		FALSE	0	ZNF830	0	0
20758	4.08783784	8.24E-04	0.2446281	0	2	8	FALSE	FRA10AC1	57.5	2	0	0	0.69121622		FALSE	0	FRA10AC1	7762	0.52803738
20761	4.1463964	0	0.24117328	0	1	8	FALSE	SAP18	83	1	0	0	0.68536036		FALSE	0	SAP18	0	0
20763	4.1463964	0	0.24117328	0	1	8	FALSE	SRSF11	83	1	0	0	0.68536036		FALSE	0	SRSF11	0	0
20766	4.1463964	0	0.24117328	0	1	8	FALSE	SRCAP	83	1	0	0	0.68536036		FALSE	0	SRCAP	0	0
20768	3.51576577	0.03068877	0.28443306	0	3	6	FALSE	U2AF2	87.66666667	3	0	0	0.74842342		FALSE	0	U2AF2	207014	0.33986928
20770	4.1463964	0	0.24117328	0	1	8	FALSE	RNF113A	83	1	0	0	0.68536036		FALSE	0	RNF113A	0	0
20772	3.31756757	0.03730891	0.30142566	0	4	6	FALSE	MYC	77.5	4	0	0	0.76824324		FALSE	0	MYC	189560	0.25585284
20775	4.1463964	0	0.24117328	0	1	8	FALSE	SMARCA5	83	1	0	0	0.68536036		FALSE	0	SMARCA5	0	0
20777	4.1463964	0	0.24117328	0	1	8	FALSE	THOC1	83	1	0	0	0.68536036		FALSE	0	THOC1	0	0
20779	4.1463964	0	0.24117328	0	1	8	FALSE	TOP2B	83	1	0	0	0.68536036		FALSE	0	TOP2B	0	0
20781	4.1463964	0	0.24117328	0	1	8	FALSE	SMU1	83	1	0	0	0.68536036		FALSE	0	SMU1	0	0
20783	4.11261261	0.00432246	0.24315444	0	2	8	FALSE	UBD	46.5	2	0	0	0.68873874		FALSE	0	UBD	32520	0.5
20786	4.1463964	0	0.24117328	0	1	8	FALSE	RPS7	83	1	0	0	0.68536036		FALSE	0	RPS7	0	0
20788	4.1463964	0	0.24117328	0	1	8	FALSE	SRSF1	83	1	0	0	0.68536036		FALSE	0	SRSF1	0	0
20791	3.65315315	0.00559372	0.27373613	0	2	8	FALSE	JUN	114	2	0	0	0.73468468		FALSE	0	JUN	35566	0.50900901
20793	4.1463964	0	0.24117328	0	1	8	FALSE	VTN	83	1	0	0	0.68536036		FALSE	0	VTN	0	0
20796	4.1463964	0	0.24117328	0	1	8	FALSE	TOP1	83	1	0	0	0.68536036		FALSE	0	TOP1	0	0
20798	4.08783784	8.24E-04	0.2446281	0	2	8	FALSE	AURKA	57.5	2	0	0	0.69121622		FALSE	0	AURKA	7762	0.52803738
20800	4.1463964	0	0.24117328	0	1	8	FALSE	PFN2	83	1	0	0	0.68536036		FALSE	0	PFN2	0	0
20802	4.1463964	0	0.24117328	0	1	8	FALSE	TPR	83	1	0	0	0.68536036		FALSE	0	TPR	0	0
20804	4.1463964	0	0.24117328	0	1	8	FALSE	CHD3	83	1	0	0	0.68536036		FALSE	0	CHD3	0	0
20806	4.1463964	0	0.24117328	0	1	8	FALSE	CEP70	83	1	0	0	0.68536036		FALSE	0	CEP70	0	0
20808	4.1463964	0	0.24117328	0	1	8	FALSE	7-Sep	83	1	0	0	0.68536036		FALSE	0	7-Sep	0	0
20810	4.1463964	0	0.24117328	0	1	8	FALSE	ZNF326	83	1	0	0	0.68536036		FALSE	0	ZNF326	0	0
20812	4.1463964	0	0.24117328	0	1	8	FALSE	WDR18	83	1	0	0	0.68536036		FALSE	0	WDR18	0	0
20814	4.1463964	0	0.24117328	0	1	8	FALSE	SAFB2	83	1	0	0	0.68536036		FALSE	0	SAFB2	0	0
20816	4.01351351	0.00436036	0.24915825	0	2	8	FALSE	U2AF1	72	2	0	0	0.69864865		FALSE	0	U2AF1	18352	0.50714286
20818	4.1463964	0	0.24117328	0	1	8	FALSE	SRSF5	83	1	0	0	0.68536036		FALSE	0	SRSF5	0	0
20820	4.1463964	0	0.24117328	0	1	8	FALSE	TOE1	83	1	0	0	0.68536036		FALSE	0	TOE1	0	0
20823	3.20157658	0.05583233	0.31234611	0	23	7	FALSE	LRRC1	2.34782609	23	0	0	0.77984234		FALSE	0	LRRC1	205634	0.06126482
20825	3.75	0.00551906	0.26666667	0	3	8	FALSE	CDC5L	59	3	0	0	0.725		FALSE	0	CDC5L	19738	0.33918129
20827	4.20045045	0	0.23806971	0	1	8	FALSE	DLG4	23	1	0	0	0.67995495		FALSE	0	DLG4	0	0
20829	4.20045045	0	0.23806971	0	1	8	FALSE	KIAA1377	23	1	0	0	0.67995495		FALSE	0	KIAA1377	0	0
20832	4.20045045	0	0.23806971	0	1	8	FALSE	ERBB4	23	1	0	0	0.67995495		FALSE	0	ERBB4	0	0
20834	4.20045045	0	0.23806971	0	1	8	FALSE	B4DYC6	23	1	0	0	0.67995495		FALSE	0	B4DYC6	0	0
20836	4.15540541	0.00716248	0.24065041	0	3	8	FALSE	ESR2	14.66666667	3	0	0	0.68445946		FALSE	0	ESR2	45884	0.34166667
20838	4.20045045	0	0.23806971	0	1	8	FALSE	ERBB2IP	23	1	0	0	0.67995495		FALSE	0	ERBB2IP	0	0
20840	4.20045045	0	0.23806971	0	1	8	FALSE	NLRP5	23	1	0	0	0.67995495		FALSE	0	NLRP5	0	0
20842	4.20045045	0	0.23806971	0	1	8	FALSE	MAPRE2	23	1	0	0	0.67995495		FALSE	0	MAPRE2	0	0
20845	1	1	1	0	2	1	FALSE	LRRC23	1	2	0	0	1		FALSE	0	LRRC23	2	0
20846	1.5	0	0.66666667	0	1	2	FALSE	CD28	2	1	0	0	0.75		FALSE	0	CD28	0	0
20848	4.30743243	0.00899377	0.23215686	0	5	7	FALSE	MATN4	1.6	5	0	0	0.66925676		FALSE	0	MATN4	28564	0.2
20849	5.30630631	0	0.18845501	0	1	8	FALSE	MATN1	5	1	0	0	0.56936937		FALSE	0	MATN1	0	0
20851	5.30630631	0	0.18845501	0	1	8	FALSE	MATN3	5	1	0	0	0.56936937		FALSE	0	MATN3	0	0
20853	5.30630631	0	0.18845501	0	1	8	FALSE	MATN2	5	1	0	0	0.56936937		FALSE	0	MATN2	0	0
20855	4.70157658	0.08120061	0.21269461	0	37	7	FALSE	MMP7	1.08108108	37	0	0	0.62984234	mRNAup	FALSE	0	MMP7	191440	0.04054054
20856	5.70045045	0	0.17542473	0	1	8	FALSE	GID4	37	1	0	0	0.52995495		FALSE	0	GID4	0	0
20858	5.70045045	0	0.17542473	0	1	8	FALSE	MMP1	37	1	0	0	0.52995495		FALSE	0	MMP1	0	0
20860	5.70045045	0	0.17542473	0	1	8	FALSE	CD44	37	1	0	0	0.52995495	mRNAup	FALSE	0	CD44	0	0
20862	5.70045045	0	0.17542473	0	1	8	FALSE	CNOT10	37	1	0	0	0.52995495		FALSE	0	CNOT10	0	0
20864	5.70045045	0	0.17542473	0	1	8	FALSE	MAEA	37	1	0	0	0.52995495		FALSE	0	MAEA	0	0
20866	5.70045045	0	0.17542473	0	1	8	FALSE	RMND5A	37	1	0	0	0.52995495		FALSE	0	RMND5A	0	0
20868	5.70045045	0	0.17542473	0	1	8	FALSE	DCN	37	1	0	0	0.52995495		FALSE	0	DCN	0	0
20870	5.70045045	0	0.17542473	0	1	8	FALSE	RANBP9	37	1	0	0	0.52995495		FALSE	0	RANBP9	0	0
20872	5.70045045	0	0.17542473	0	1	8	FALSE	PLG	37	1	0	0	0.52995495		FALSE	0	PLG	0	0
20874	5.70045045	0	0.17542473	0	1	8	FALSE	SERPINA1	37	1	0	0	0.52995495		FALSE	0	SERPINA1	0	0
20876	5.70045045	0	0.17542473	0	1	8	FALSE	FASLG	37	1	0	0	0.52995495		FALSE	0	FASLG	0	0
20878	5.70045045	0	0.17542473	0	1	8	FALSE	HAPLN1	37	1	0	0	0.52995495	mRNAdown	FALSE	0	HAPLN1	0	0
20880	5.70045045	0	0.17542473	0	1	8	FALSE	CNOT7	37	1	0	0	0.52995495		FALSE	0	CNOT7	0	0
20882	5.62612613	0.00201881	0.17774219	0	2	8	FALSE	CNOT1	21	2	0	0	0.53738739		FALSE	0	CNOT1	16332	0.51282051
20884	5.62612613	0.00201881	0.17774219	0	2	8	FALSE	CNOT3	21	2	0	0	0.53738739		FALSE	0	CNOT3	16332	0.51282051
20886	3.79279279	0.07966525	0.26365796	0	2	6	FALSE	ARMC8	57	2	0	0	0.72072072		FALSE	0	ARMC8	186998	0.5
20888	5.70045045	0	0.17542473	0	1	8	FALSE	HBEGF	37	1	0	0	0.52995495		FALSE	0	HBEGF	0	0
20890	5.70045045	0	0.17542473	0	1	8	FALSE	CNOT2	37	1	0	0	0.52995495		FALSE	0	CNOT2	0	0
20892	5.70045045	0	0.17542473	0	1	8	FALSE	RANBP10	37	1	0	0	0.52995495		FALSE	0	RANBP10	0	0
20894	5.70045045	0	0.17542473	0	1	8	FALSE	MKLN1	37	1	0	0	0.52995495		FALSE	0	MKLN1	0	0
20896	5.70045045	0	0.17542473	0	1	8	FALSE	MBP	37	1	0	0	0.52995495		FALSE	0	MBP	0	0
20898	5.70045045	0	0.17542473	0	1	8	FALSE	TNKS1BP1	37	1	0	0	0.52995495		FALSE	0	TNKS1BP1	0	0
20900	5.70045045	0	0.17542473	0	1	8	FALSE	BCAN	37	1	0	0	0.52995495		FALSE	0	BCAN	0	0
20902	5.70045045	0	0.17542473	0	1	8	FALSE	RQCD1	37	1	0	0	0.52995495		FALSE	0	RQCD1	0	0
20904	5.70045045	0	0.17542473	0	1	8	FALSE	CNOT6L	37	1	0	0	0.52995495		FALSE	0	CNOT6L	0	0
20906	5.70045045	0	0.17542473	0	1	8	FALSE	CNOT11	37	1	0	0	0.52995495		FALSE	0	CNOT11	0	0
20908	5.70045045	0	0.17542473	0	1	8	FALSE	MMP9	37	1	0	0	0.52995495		FALSE	0	MMP9	0	0
20910	5.70045045	0	0.17542473	0	1	8	FALSE	SPP1	37	1	0	0	0.52995495	mRNAup	FALSE	0	SPP1	0	0
20912	5.70045045	0	0.17542473	0	1	8	FALSE	DEFB1	37	1	0	0	0.52995495		FALSE	0	DEFB1	0	0
20914	5.70045045	0	0.17542473	0	1	8	FALSE	CD151	37	1	0	0	0.52995495		FALSE	0	CD151	0	0
20916	5.70045045	0	0.17542473	0	1	8	FALSE	CNOT6	37	1	0	0	0.52995495		FALSE	0	CNOT6	0	0
20918	5.70045045	0	0.17542473	0	1	8	FALSE	CNOT8	37	1	0	0	0.52995495		FALSE	0	CNOT8	0	0
20920	5.70045045	0	0.17542473	0	1	8	FALSE	GID8	37	1	0	0	0.52995495		FALSE	0	GID8	0	0
20922	6.46283784	0.00653981	0.15473079	0	5	9	FALSE	NANOS2	1.8	5	0	0	0.45371622	mRNAdown	FALSE	0	NANOS2	61780	0.26666667
20925	4.68581081	0.02298401	0.21341024	0	13	9	FALSE	NCOA7	1.38461538	13	0	0	0.63141892		FALSE	0	NCOA7	120876	0.07692308
20926	3.99774775	0.01487118	0.25014085	0	3	8	FALSE	ESR1	35.66666667	3	0	0	0.70022523		FALSE	0	ESR1	81258	0.33656958
20928	5.68468468	0	0.17591125	0	1	10	FALSE	GABPA	13	1	0	0	0.53153153		FALSE	0	GABPA	0	0
20930	5.68468468	0	0.17591125	0	1	10	FALSE	RAB3GAP1	13	1	0	0	0.53153153		FALSE	0	RAB3GAP1	0	0
20932	5.68468468	0	0.17591125	0	1	10	FALSE	GABARAPL2	13	1	0	0	0.53153153		FALSE	0	GABARAPL2	0	0
20934	3.29391892	0.12878792	0.30358974	0	61	7	FALSE	NDN	1.40983607	61	0	0	0.77060811		FALSE	0	NDN	452752	0.02157032
20935	4.29279279	0	0.23294858	0	1	8	FALSE	E2F4	61	1	0	0	0.67072072		FALSE	0	E2F4	0	0
20937	4.29279279	0	0.23294858	0	1	8	FALSE	E2F1	61	1	0	0	0.67072072		FALSE	0	E2F1	0	0
20939	4.29279279	0	0.23294858	0	1	8	FALSE	FSD2	61	1	0	0	0.67072072		FALSE	0	FSD2	0	0
20941	4.29279279	0	0.23294858	0	1	8	FALSE	LAX1	61	1	0	0	0.67072072	mRNAup	FALSE	0	LAX1	0	0
20943	4.29279279	0	0.23294858	0	1	8	FALSE	DTNBP1	61	1	0	0	0.67072072		FALSE	0	DTNBP1	0	0
20945	4.29279279	0	0.23294858	0	1	8	FALSE	EID2B	61	1	0	0	0.67072072		FALSE	0	EID2B	0	0
20947	4.29279279	0	0.23294858	0	1	8	FALSE	PPFIA1	61	1	0	0	0.67072072		FALSE	0	PPFIA1	0	0
20949	4.29279279	0	0.23294858	0	1	8	FALSE	IFFO1	61	1	0	0	0.67072072		FALSE	0	IFFO1	0	0
20951	4.29279279	0	0.23294858	0	1	8	FALSE	MKRN2	61	1	0	0	0.67072072		FALSE	0	MKRN2	0	0
20953	4.29279279	0	0.23294858	0	1	8	FALSE	EID2	61	1	0	0	0.67072072		FALSE	0	EID2	0	0
20955	4.29279279	0	0.23294858	0	1	8	FALSE	CALCOCO2	61	1	0	0	0.67072072		FALSE	0	CALCOCO2	0	0
20957	4.29279279	0	0.23294858	0	1	8	FALSE	FXR2	61	1	0	0	0.67072072		FALSE	0	FXR2	0	0
20959	4.29279279	0	0.23294858	0	1	8	FALSE	SRPRB	61	1	0	0	0.67072072		FALSE	0	SRPRB	0	0
20961	4.29279279	0	0.23294858	0	1	8	FALSE	EID3	61	1	0	0	0.67072072		FALSE	0	EID3	0	0
20963	4.29279279	0	0.23294858	0	1	8	FALSE	IL1A	61	1	0	0	0.67072072		FALSE	0	IL1A	0	0
20965	4.29279279	0	0.23294858	0	1	8	FALSE	TFIP11	61	1	0	0	0.67072072		FALSE	0	TFIP11	0	0
20968	4.29279279	0	0.23294858	0	1	8	FALSE	MPP6	61	1	0	0	0.67072072		FALSE	0	MPP6	0	0
20970	4.29279279	0	0.23294858	0	1	8	FALSE	HIF1A	61	1	0	0	0.67072072	mRNAup	FALSE	0	HIF1A	0	0
20972	4.29279279	0	0.23294858	0	1	8	FALSE	DHCR7	61	1	0	0	0.67072072		FALSE	0	DHCR7	0	0
20974	4.29279279	0	0.23294858	0	1	8	FALSE	RPS11	61	1	0	0	0.67072072		FALSE	0	RPS11	0	0
20976	4.29279279	0	0.23294858	0	1	8	FALSE	NSMCE4A	61	1	0	0	0.67072072		FALSE	0	NSMCE4A	0	0
20978	4.00900901	0.00639044	0.2494382	0	2	6	FALSE	p53	48	2	0	0	0.6990991		FALSE	0	p53	49246	0.50537634
20980	4.29279279	0	0.23294858	0	1	8	FALSE	NEFL	61	1	0	0	0.67072072		FALSE	0	NEFL	0	0
20982	4.29279279	0	0.23294858	0	1	8	FALSE	TRIM28	61	1	0	0	0.67072072		FALSE	0	TRIM28	0	0
20984	4.29279279	0	0.23294858	0	1	8	FALSE	NGFR	61	1	0	0	0.67072072		FALSE	0	NGFR	0	0
20986	4.29279279	0	0.23294858	0	1	8	FALSE	SEC61A1	61	1	0	0	0.67072072		FALSE	0	SEC61A1	0	0
20988	4.29279279	0	0.23294858	0	1	8	FALSE	EID1	61	1	0	0	0.67072072		FALSE	0	EID1	0	0
20990	4.29279279	0	0.23294858	0	1	8	FALSE	CCDC136	61	1	0	0	0.67072072		FALSE	0	CCDC136	0	0
20992	4.29279279	0	0.23294858	0	1	8	FALSE	SSX2IP	61	1	0	0	0.67072072		FALSE	0	SSX2IP	0	0
20994	4.29279279	0	0.23294858	0	1	8	FALSE	CDR2	61	1	0	0	0.67072072		FALSE	0	CDR2	0	0
20996	4.29279279	0	0.23294858	0	1	8	FALSE	APBB1IP	61	1	0	0	0.67072072		FALSE	0	APBB1IP	0	0
20998	4.29279279	0	0.23294858	0	1	8	FALSE	NUCB1	61	1	0	0	0.67072072		FALSE	0	NUCB1	0	0
21000	4.29279279	0	0.23294858	0	1	8	FALSE	FAM131C	61	1	0	0	0.67072072		FALSE	0	FAM131C	0	0
21002	3.93918919	0.01337091	0.25385935	0	3	6	FALSE	TP53	42.66666667	3	0	0	0.70608108		FALSE	0	TP53	85006	0.33875339
21004	4.29279279	0	0.23294858	0	1	8	FALSE	CERS2	61	1	0	0	0.67072072		FALSE	0	CERS2	0	0
21006	4.29279279	0	0.23294858	0	1	8	FALSE	MIER2	61	1	0	0	0.67072072		FALSE	0	MIER2	0	0
21008	4.29279279	0	0.23294858	0	1	8	FALSE	AUP1	61	1	0	0	0.67072072		FALSE	0	AUP1	0	0
21010	4.29279279	0	0.23294858	0	1	8	FALSE	P4HA3	61	1	0	0	0.67072072		FALSE	0	P4HA3	0	0
21012	4.29279279	0	0.23294858	0	1	8	FALSE	N6AMT2	61	1	0	0	0.67072072		FALSE	0	N6AMT2	0	0
21014	4.29279279	0	0.23294858	0	1	8	FALSE	ZBTB1	61	1	0	0	0.67072072		FALSE	0	ZBTB1	0	0
21016	4.29279279	0	0.23294858	0	1	8	FALSE	KPNB1	61	1	0	0	0.67072072		FALSE	0	KPNB1	0	0
21018	4.29279279	0	0.23294858	0	1	8	FALSE	PJA1	61	1	0	0	0.67072072		FALSE	0	PJA1	0	0
21020	4.29279279	0	0.23294858	0	1	8	FALSE	TMEM33	61	1	0	0	0.67072072		FALSE	0	TMEM33	0	0
21022	4.29279279	0	0.23294858	0	1	8	FALSE	SERTAD3	61	1	0	0	0.67072072		FALSE	0	SERTAD3	0	0
21024	4.29279279	0	0.23294858	0	1	8	FALSE	GOLGA4	61	1	0	0	0.67072072		FALSE	0	GOLGA4	0	0
21026	4.29279279	0	0.23294858	0	1	8	FALSE	NUBP1	61	1	0	0	0.67072072		FALSE	0	NUBP1	0	0
21028	4.29279279	0	0.23294858	0	1	8	FALSE	NCL	61	1	0	0	0.67072072		FALSE	0	NCL	0	0
21030	4.29279279	0	0.23294858	0	1	8	FALSE	ZBTB7B	61	1	0	0	0.67072072		FALSE	0	ZBTB7B	0	0
21032	4.29279279	0	0.23294858	0	1	8	FALSE	GKAP1	61	1	0	0	0.67072072		FALSE	0	GKAP1	0	0
21034	4.29279279	0	0.23294858	0	1	8	FALSE	TNPO1	61	1	0	0	0.67072072		FALSE	0	TNPO1	0	0
21037	4.29279279	0	0.23294858	0	1	8	FALSE	BLOC1S6	61	1	0	0	0.67072072		FALSE	0	BLOC1S6	0	0
21039	4.25900901	0.00290095	0.2347964	0	2	8	FALSE	GOLGA2	35.5	2	0	0	0.6740991		FALSE	0	GOLGA2	17156	0.5
21041	4.29279279	0	0.23294858	0	1	8	FALSE	LPXN	61	1	0	0	0.67072072		FALSE	0	LPXN	0	0
21043	3.31869369	0.04192798	0.30132338	0	21	7	FALSE	PCYT2	2	21	0	0	0.76813063		FALSE	0	PCYT2	125780	0.05555556
21044	4.31756757	0	0.23161189	0	1	8	FALSE	CAPN2	21	1	0	0	0.66824324		FALSE	0	CAPN2	0	0
21046	3.80405405	0.0141536	0.26287744	0	3	8	FALSE	YWHAH	59	3	0	0	0.71959459		FALSE	0	YWHAH	134052	0.3452381
21048	4.31756757	0	0.23161189	0	1	8	FALSE	SETDB1	21	1	0	0	0.66824324		FALSE	0	SETDB1	0	0
21050	4.31756757	0	0.23161189	0	1	8	FALSE	ADAMTS10	21	1	0	0	0.66824324		FALSE	0	ADAMTS10	0	0
21052	4.31756757	0	0.23161189	0	1	8	FALSE	JMJD5	21	1	0	0	0.66824324		FALSE	0	JMJD5	0	0
21054	4.31756757	0	0.23161189	0	1	8	FALSE	DNMT3B	21	1	0	0	0.66824324		FALSE	0	DNMT3B	0	0
21056	4.31756757	0	0.23161189	0	1	8	FALSE	KDM8	21	1	0	0	0.66824324		FALSE	0	KDM8	0	0
21058	4.31756757	0	0.23161189	0	1	8	FALSE	XPO1	21	1	0	0	0.66824324		FALSE	0	XPO1	0	0
21061	4.31756757	0	0.23161189	0	1	8	FALSE	GDF9	21	1	0	0	0.66824324		FALSE	0	GDF9	0	0
21063	4.31756757	0	0.23161189	0	1	8	FALSE	CRIP2	21	1	0	0	0.66824324		FALSE	0	CRIP2	0	0
21065	4.31756757	0	0.23161189	0	1	8	FALSE	DCPS	21	1	0	0	0.66824324		FALSE	0	DCPS	0	0
21068	3.50112613	0.01123587	0.28562239	0	6	7	FALSE	PLCD3	3.83333333	6	0	0	0.74988739		FALSE	0	PLCD3	24510	0.16666667
21070	4.67004505	0.01823525	0.2141307	0	11	9	FALSE	PRKX	1.54545455	11	0	0	0.6329955		FALSE	0	PRKX	115148	0.18181818
21071	5.66891892	0	0.17640048	0	1	10	FALSE	PRKAR1A	11	1	0	0	0.53310811		FALSE	0	PRKAR1A	0	0
21073	5.66891892	0	0.17640048	0	1	10	FALSE	SMAD6	11	1	0	0	0.53310811		FALSE	0	SMAD6	0	0
21076	5.66891892	0	0.17640048	0	1	10	FALSE	PRKAR2A	11	1	0	0	0.53310811		FALSE	0	PRKAR2A	0	0
21078	4.27815315	0.01049326	0.23374572	0	8	9	FALSE	PROSER2	2	8	0	0	0.67218468		FALSE	0	PROSER2	68110	0.14285714
21079	5.27702703	0	0.18950064	0	1	10	FALSE	YTHDC1	8	1	0	0	0.5722973		FALSE	0	YTHDC1	0	0
21081	5.27702703	0	0.18950064	0	1	10	FALSE	EPS8	8	1	0	0	0.5722973		FALSE	0	EPS8	0	0
21083	5.27702703	0	0.18950064	0	1	10	FALSE	PKM	8	1	0	0	0.5722973		FALSE	0	PKM	0	0
21086	2.84572072	0.30956005	0.35140483	0	145	7	FALSE	PSMA2	1.34482759	145	0	0	0.81542793		FALSE	0	PSMA2	1155240	0.01436782
21087	3.84459459	0	0.26010545	0	1	8	FALSE	PSMA8	145	1	0	0	0.71554054		FALSE	0	PSMA8	0	0
21089	3.84459459	0	0.26010545	0	1	8	FALSE	PSMB4	145	1	0	0	0.71554054		FALSE	0	PSMB4	0	0
21091	3.84459459	0	0.26010545	0	1	8	FALSE	TPM3	145	1	0	0	0.71554054		FALSE	0	TPM3	0	0
21093	3.84459459	0	0.26010545	0	1	8	FALSE	PSME4	145	1	0	0	0.71554054		FALSE	0	PSME4	0	0
21095	3.84459459	0	0.26010545	0	1	8	FALSE	PSMD14	145	1	0	0	0.71554054		FALSE	0	PSMD14	0	0
21097	3.84459459	0	0.26010545	0	1	8	FALSE	PSMB6	145	1	0	0	0.71554054		FALSE	0	PSMB6	0	0
21099	3.84459459	0	0.26010545	0	1	8	FALSE	FBXW7	145	1	0	0	0.71554054		FALSE	0	FBXW7	0	0
21102	3.84459459	0	0.26010545	0	1	8	FALSE	PSMD12	145	1	0	0	0.71554054		FALSE	0	PSMD12	0	0
21104	3.84459459	0	0.26010545	0	1	8	FALSE	EEF1A1	145	1	0	0	0.71554054		FALSE	0	EEF1A1	0	0
21106	3.84459459	0	0.26010545	0	1	8	FALSE	WDR11	145	1	0	0	0.71554054		FALSE	0	WDR11	0	0
21108	3.84459459	0	0.26010545	0	1	8	FALSE	DDI2	145	1	0	0	0.71554054		FALSE	0	DDI2	0	0
21110	3.84459459	0	0.26010545	0	1	8	FALSE	PRPF19	145	1	0	0	0.71554054		FALSE	0	PRPF19	0	0
21112	3.81081081	0.00258558	0.26241135	0	2	8	FALSE	USP7	80.5	2	0	0	0.71891892		FALSE	0	USP7	9866	0.50316456
21114	3.84459459	0	0.26010545	0	1	8	FALSE	PSMD11	145	1	0	0	0.71554054		FALSE	0	PSMD11	0	0
21116	3.84459459	0	0.26010545	0	1	8	FALSE	DCTN2	145	1	0	0	0.71554054		FALSE	0	DCTN2	0	0
21118	3.84459459	0	0.26010545	0	1	8	FALSE	RBX1	145	1	0	0	0.71554054		FALSE	0	RBX1	0	0
21120	3.84459459	0	0.26010545	0	1	8	FALSE	PSMD2	145	1	0	0	0.71554054		FALSE	0	PSMD2	0	0
21122	3.77927928	0.00262512	0.26460072	0	2	8	FALSE	VCP	88.5	2	0	0	0.72207207		FALSE	0	VCP	15970	0.50872093
21124	3.84459459	0	0.26010545	0	1	8	FALSE	PSMD13	145	1	0	0	0.71554054		FALSE	0	PSMD13	0	0
21126	3.84459459	0	0.26010545	0	1	8	FALSE	POMP	145	1	0	0	0.71554054		FALSE	0	POMP	0	0
21128	3.84459459	0	0.26010545	0	1	8	FALSE	PSMG1	145	1	0	0	0.71554054		FALSE	0	PSMG1	0	0
21130	3.84459459	0	0.26010545	0	1	8	FALSE	UBE3C	145	1	0	0	0.71554054		FALSE	0	UBE3C	0	0
21132	3.84459459	0	0.26010545	0	1	8	FALSE	KIAA0368	145	1	0	0	0.71554054		FALSE	0	KIAA0368	0	0
21134	3.84459459	0	0.26010545	0	1	8	FALSE	USP14	145	1	0	0	0.71554054		FALSE	0	USP14	0	0
21136	3.84459459	0	0.26010545	0	1	8	FALSE	PHKG2	145	1	0	0	0.71554054		FALSE	0	PHKG2	0	0
21138	3.84459459	0	0.26010545	0	1	8	FALSE	EXOSC6	145	1	0	0	0.71554054		FALSE	0	EXOSC6	0	0
21140	3.84459459	0	0.26010545	0	1	8	FALSE	PSME2	145	1	0	0	0.71554054		FALSE	0	PSME2	0	0
21143	3.84459459	0	0.26010545	0	1	8	FALSE	EXOSC2	145	1	0	0	0.71554054		FALSE	0	EXOSC2	0	0
21145	3.84459459	0	0.26010545	0	1	8	FALSE	RAD23B	145	1	0	0	0.71554054		FALSE	0	RAD23B	0	0
21147	3.77927928	0.00262512	0.26460072	0	2	8	FALSE	SNRPA1	88.5	2	0	0	0.72207207		FALSE	0	SNRPA1	15970	0.50872093
21149	3.84459459	0	0.26010545	0	1	8	FALSE	PSMD1	145	1	0	0	0.71554054		FALSE	0	PSMD1	0	0
21151	3.84459459	0	0.26010545	0	1	8	FALSE	PSME3	145	1	0	0	0.71554054		FALSE	0	PSME3	0	0
21153	3.84459459	0	0.26010545	0	1	8	FALSE	EXOSC9	145	1	0	0	0.71554054		FALSE	0	EXOSC9	0	0
21155	3.84459459	0	0.26010545	0	1	8	FALSE	PAAF1	145	1	0	0	0.71554054		FALSE	0	PAAF1	0	0
21157	3.84459459	0	0.26010545	0	1	8	FALSE	PSMG3	145	1	0	0	0.71554054		FALSE	0	PSMG3	0	0
21159	3.77927928	0.00262512	0.26460072	0	2	8	FALSE	VIM	88.5	2	0	0	0.72207207		FALSE	0	VIM	15970	0.50872093
21161	3.76126126	0.00260798	0.26586826	0	2	8	FALSE	PSMC4	86.5	2	0	0	0.72387387		FALSE	0	PSMC4	17656	0.50892857
21163	3.84459459	0	0.26010545	0	1	8	FALSE	ZNF24	145	1	0	0	0.71554054		FALSE	0	ZNF24	0	0
21165	3.84459459	0	0.26010545	0	1	8	FALSE	SKP1	145	1	0	0	0.71554054		FALSE	0	SKP1	0	0
21167	3.84459459	0	0.26010545	0	1	8	FALSE	PSMC5	145	1	0	0	0.71554054		FALSE	0	PSMC5	0	0
21169	3.64189189	0.00762826	0.27458256	0	2	8	FALSE	BCAR3	113.5	2	0	0	0.73581081		FALSE	0	BCAR3	37122	0.50675676
21171	3.84459459	0	0.26010545	0	1	8	FALSE	PSMD8	145	1	0	0	0.71554054		FALSE	0	PSMD8	0	0
21173	3.84459459	0	0.26010545	0	1	8	FALSE	CCT3	145	1	0	0	0.71554054		FALSE	0	CCT3	0	0
21175	3.84459459	0	0.26010545	0	1	8	FALSE	CUL1	145	1	0	0	0.71554054		FALSE	0	CUL1	0	0
21177	3.84459459	0	0.26010545	0	1	8	FALSE	EIF1B	145	1	0	0	0.71554054		FALSE	0	EIF1B	0	0
21179	3.84459459	0	0.26010545	0	1	8	FALSE	PSMB7	145	1	0	0	0.71554054		FALSE	0	PSMB7	0	0
21181	3.84459459	0	0.26010545	0	1	8	FALSE	PSMD4	145	1	0	0	0.71554054		FALSE	0	PSMD4	0	0
21183	3.84459459	0	0.26010545	0	1	8	FALSE	PSMB9	145	1	0	0	0.71554054		FALSE	0	PSMB9	0	0
21185	3.84459459	0	0.26010545	0	1	8	FALSE	PSMB10	145	1	0	0	0.71554054		FALSE	0	PSMB10	0	0
21187	3.84459459	0	0.26010545	0	1	8	FALSE	PSMA7	145	1	0	0	0.71554054		FALSE	0	PSMA7	0	0
21189	3.84459459	0	0.26010545	0	1	8	FALSE	ADRM1	145	1	0	0	0.71554054		FALSE	0	ADRM1	0	0
21191	3.84459459	0	0.26010545	0	1	8	FALSE	UCHL5	145	1	0	0	0.71554054		FALSE	0	UCHL5	0	0
21193	3.84459459	0	0.26010545	0	1	8	FALSE	PSMA5	145	1	0	0	0.71554054		FALSE	0	PSMA5	0	0
21195	3.84459459	0	0.26010545	0	1	8	FALSE	PSMB3	145	1	0	0	0.71554054		FALSE	0	PSMB3	0	0
21198	3.64189189	0.00762826	0.27458256	0	2	8	FALSE	HSPA5	113.5	2	0	0	0.73581081		FALSE	0	HSPA5	37122	0.50675676
21200	3.84459459	0	0.26010545	0	1	8	FALSE	PSME1	145	1	0	0	0.71554054		FALSE	0	PSME1	0	0
21202	3.84459459	0	0.26010545	0	1	8	FALSE	PNMA2	145	1	0	0	0.71554054		FALSE	0	PNMA2	0	0
21204	3.84459459	0	0.26010545	0	1	8	FALSE	HEATR1	145	1	0	0	0.71554054		FALSE	0	HEATR1	0	0
21206	3.84459459	0	0.26010545	0	1	8	FALSE	UBB	145	1	0	0	0.71554054		FALSE	0	UBB	0	0
21208	3.84459459	0	0.26010545	0	1	8	FALSE	PSMC2	145	1	0	0	0.71554054		FALSE	0	PSMC2	0	0
21210	3.84459459	0	0.26010545	0	1	8	FALSE	PSMF1	145	1	0	0	0.71554054		FALSE	0	PSMF1	0	0
21212	3.84459459	0	0.26010545	0	1	8	FALSE	PSMD5	145	1	0	0	0.71554054		FALSE	0	PSMD5	0	0
21214	3.84459459	0	0.26010545	0	1	8	FALSE	SERPINH1	145	1	0	0	0.71554054		FALSE	0	SERPINH1	0	0
21216	3.84459459	0	0.26010545	0	1	8	FALSE	PSMB2	145	1	0	0	0.71554054		FALSE	0	PSMB2	0	0
21218	3.84459459	0	0.26010545	0	1	8	FALSE	PSMB8	145	1	0	0	0.71554054		FALSE	0	PSMB8	0	0
21220	3.84459459	0	0.26010545	0	1	8	FALSE	HSPA8	145	1	0	0	0.71554054		FALSE	0	HSPA8	0	0
21223	3.84459459	0	0.26010545	0	1	8	FALSE	YBX1	145	1	0	0	0.71554054		FALSE	0	YBX1	0	0
21225	3.84459459	0	0.26010545	0	1	8	FALSE	PSMD3	145	1	0	0	0.71554054		FALSE	0	PSMD3	0	0
21227	3.84459459	0	0.26010545	0	1	8	FALSE	PSMA4	145	1	0	0	0.71554054		FALSE	0	PSMA4	0	0
21229	3.84459459	0	0.26010545	0	1	8	FALSE	PSMG2	145	1	0	0	0.71554054		FALSE	0	PSMG2	0	0
21231	3.84459459	0	0.26010545	0	1	8	FALSE	AMT	145	1	0	0	0.71554054		FALSE	0	AMT	0	0
21233	3.84459459	0	0.26010545	0	1	8	FALSE	PSMD7	145	1	0	0	0.71554054		FALSE	0	PSMD7	0	0
21235	3.84459459	0	0.26010545	0	1	8	FALSE	PSMC6	145	1	0	0	0.71554054		FALSE	0	PSMC6	0	0
21237	3.84459459	0	0.26010545	0	1	8	FALSE	PSMC3	145	1	0	0	0.71554054		FALSE	0	PSMC3	0	0
21239	3.84459459	0	0.26010545	0	1	8	FALSE	UBA2	145	1	0	0	0.71554054		FALSE	0	UBA2	0	0
21241	3.84459459	0	0.26010545	0	1	8	FALSE	ELP6	145	1	0	0	0.71554054		FALSE	0	ELP6	0	0
21243	3.84459459	0	0.26010545	0	1	8	FALSE	ZC3H4	145	1	0	0	0.71554054		FALSE	0	ZC3H4	0	0
21245	3.84459459	0	0.26010545	0	1	8	FALSE	CAND1	145	1	0	0	0.71554054		FALSE	0	CAND1	0	0
21247	3.84459459	0	0.26010545	0	1	8	FALSE	CCT7	145	1	0	0	0.71554054		FALSE	0	CCT7	0	0
21249	3.84459459	0	0.26010545	0	1	8	FALSE	CLIC4	145	1	0	0	0.71554054		FALSE	0	CLIC4	0	0
21251	3.84459459	0	0.26010545	0	1	8	FALSE	CRBN	145	1	0	0	0.71554054		FALSE	0	CRBN	0	0
21253	3.76126126	0.00260798	0.26586826	0	2	8	FALSE	PSMB1	86.5	2	0	0	0.72387387		FALSE	0	PSMB1	17656	0.50892857
21255	3.19256757	0.06657298	0.31322751	0	28	7	FALSE	RIOK3	2.28571429	28	0	0	0.78074324		FALSE	0	RIOK3	326226	0.05844156
21257	4.19144144	0	0.23858141	0	1	8	FALSE	MAGEA6	28	1	0	0	0.68085586		FALSE	0	MAGEA6	0	0
21260	4.19144144	0	0.23858141	0	1	8	FALSE	RUVBL2	28	1	0	0	0.68085586		FALSE	0	RUVBL2	0	0
21262	4.15765766	7.24E-04	0.24052004	0	2	8	FALSE	FBL	22	2	0	0	0.68423423		FALSE	0	FBL	4496	0.51219512
21264	4.19144144	0	0.23858141	0	1	8	FALSE	SSR4	28	1	0	0	0.68085586		FALSE	0	SSR4	0	0
21266	4.19144144	0	0.23858141	0	1	8	FALSE	CALM3	28	1	0	0	0.68085586		FALSE	0	CALM3	0	0
21268	4.73536036	0.01245585	0.21117717	0	10	9	FALSE	RNF135	1.8	10	0	0	0.62646396		FALSE	0	RNF135	102934	0.2
21269	5.73423423	0	0.1743912	0	1	10	FALSE	UBE2D2	10	1	0	0	0.52657658		FALSE	0	UBE2D2	0	0
21271	4.15990991	0.00443398	0.24038982	0	3	8	FALSE	UBE2N	15.33333333	3	0	0	0.68400901		FALSE	0	UBE2N	39552	0.36752137
21273	4.15990991	0.00443398	0.24038982	0	3	8	FALSE	UBE2V1	15.33333333	3	0	0	0.68400901		FALSE	0	UBE2V1	39552	0.36752137
21276	4.15990991	0.00443398	0.24038982	0	3	8	FALSE	UBA1	15.33333333	3	0	0	0.68400901		FALSE	0	UBA1	39552	0.36752137
21278	3.6768018	0.14809265	0.2719755	0	74	7	FALSE	SAV1	1.21621622	74	0	0	0.73231982		FALSE	0	SAV1	1121422	0.02402402
21279	4.67567568	0	0.21387283	0	1	8	FALSE	BAG1	74	1	0	0	0.63243243		FALSE	0	BAG1	0	0
21281	4.67567568	0	0.21387283	0	1	8	FALSE	PIBF1	74	1	0	0	0.63243243		FALSE	0	PIBF1	0	0
21283	4.67567568	0	0.21387283	0	1	8	FALSE	KIF7	74	1	0	0	0.63243243		FALSE	0	KIF7	0	0
21285	4.67567568	0	0.21387283	0	1	8	FALSE	OFD1	74	1	0	0	0.63243243		FALSE	0	OFD1	0	0
21287	3.69594595	0.01127381	0.27056673	0	2	6	FALSE	QARS	75.5	2	0	0	0.73040541		FALSE	0	QARS	89540	0.50680272
21289	4.67567568	0	0.21387283	0	1	8	FALSE	TNRC6B	74	1	0	0	0.63243243		FALSE	0	TNRC6B	0	0
21291	4.67567568	0	0.21387283	0	1	8	FALSE	TUBGCP2	74	1	0	0	0.63243243		FALSE	0	TUBGCP2	0	0
21293	4.67567568	0	0.21387283	0	1	8	FALSE	SQSTM1	74	1	0	0	0.63243243		FALSE	0	SQSTM1	0	0
21295	4.67567568	0	0.21387283	0	1	8	FALSE	LATS1	74	1	0	0	0.63243243		FALSE	0	LATS1	0	0
21297	3.84684685	0.00680077	0.25995316	0	2	8	FALSE	YWHAE	78	2	0	0	0.71531532		FALSE	0	YWHAE	83550	0.51333333
21299	3.84684685	0.00680077	0.25995316	0	2	8	FALSE	YWHAZ	78	2	0	0	0.71531532		FALSE	0	YWHAZ	83550	0.51333333
21301	4.67567568	0	0.21387283	0	1	8	FALSE	YTHDF1	74	1	0	0	0.63243243		FALSE	0	YTHDF1	0	0
21303	4.67567568	0	0.21387283	0	1	8	FALSE	PUM1	74	1	0	0	0.63243243		FALSE	0	PUM1	0	0
21305	3.84684685	0.00680077	0.25995316	0	2	8	FALSE	AJUBA	78	2	0	0	0.71531532		FALSE	0	AJUBA	83550	0.51333333
21307	4.67567568	0	0.21387283	0	1	8	FALSE	SNTB2	74	1	0	0	0.63243243		FALSE	0	SNTB2	0	0
21309	4.67567568	0	0.21387283	0	1	8	FALSE	UNK	74	1	0	0	0.63243243		FALSE	0	UNK	0	0
21311	4.61711712	0.0055163	0.21658537	0	2	8	FALSE	HDAC6	43.5	2	0	0	0.63828829		FALSE	0	HDAC6	25924	0.5
21313	4.67567568	0	0.21387283	0	1	8	FALSE	CNTROB	74	1	0	0	0.63243243		FALSE	0	CNTROB	0	0
21316	4.67567568	0	0.21387283	0	1	8	FALSE	SNTB1	74	1	0	0	0.63243243		FALSE	0	SNTB1	0	0
21318	4.67567568	0	0.21387283	0	1	8	FALSE	RASSF4	74	1	0	0	0.63243243		FALSE	0	RASSF4	0	0
21320	4.67567568	0	0.21387283	0	1	8	FALSE	KIRREL	74	1	0	0	0.63243243		FALSE	0	KIRREL	0	0
21323	4.67567568	0	0.21387283	0	1	8	FALSE	GRN	74	1	0	0	0.63243243		FALSE	0	GRN	0	0
21325	4.67567568	0	0.21387283	0	1	8	FALSE	INADL	74	1	0	0	0.63243243		FALSE	0	INADL	0	0
21327	4.67567568	0	0.21387283	0	1	8	FALSE	CEP85	74	1	0	0	0.63243243		FALSE	0	CEP85	0	0
21329	4.67567568	0	0.21387283	0	1	8	FALSE	PKP4	74	1	0	0	0.63243243		FALSE	0	PKP4	0	0
21331	4.67567568	0	0.21387283	0	1	8	FALSE	EIF4ENIF1	74	1	0	0	0.63243243		FALSE	0	EIF4ENIF1	0	0
21333	4.67567568	0	0.21387283	0	1	8	FALSE	RASSF3	74	1	0	0	0.63243243		FALSE	0	RASSF3	0	0
21335	4.67567568	0	0.21387283	0	1	8	FALSE	PCM1	74	1	0	0	0.63243243		FALSE	0	PCM1	0	0
21337	4.67567568	0	0.21387283	0	1	8	FALSE	UTRN	74	1	0	0	0.63243243		FALSE	0	UTRN	0	0
21339	4.18693694	0.0127363	0.23883808	0	2	6	FALSE	WTIP	54.5	2	0	0	0.68130631		FALSE	0	WTIP	85200	0.5
21341	4.67567568	0	0.21387283	0	1	8	FALSE	ALG13	74	1	0	0	0.63243243		FALSE	0	ALG13	0	0
21343	4.67567568	0	0.21387283	0	1	8	FALSE	GLMN	74	1	0	0	0.63243243		FALSE	0	GLMN	0	0
21345	4.67567568	0	0.21387283	0	1	8	FALSE	KIAA1279	74	1	0	0	0.63243243		FALSE	0	KIAA1279	0	0
21347	4.67567568	0	0.21387283	0	1	8	FALSE	FUBP3	74	1	0	0	0.63243243		FALSE	0	FUBP3	0	0
21349	4.67567568	0	0.21387283	0	1	8	FALSE	SEC16A	74	1	0	0	0.63243243		FALSE	0	SEC16A	0	0
21351	4.67567568	0	0.21387283	0	1	8	FALSE	IRS4	74	1	0	0	0.63243243		FALSE	0	IRS4	0	0
21353	4.67567568	0	0.21387283	0	1	8	FALSE	MIA3	74	1	0	0	0.63243243		FALSE	0	MIA3	0	0
21355	4.67567568	0	0.21387283	0	1	8	FALSE	APC	74	1	0	0	0.63243243		FALSE	0	APC	0	0
21357	4.67567568	0	0.21387283	0	1	8	FALSE	TNRC6A	74	1	0	0	0.63243243		FALSE	0	TNRC6A	0	0
21359	4.67567568	0	0.21387283	0	1	8	FALSE	AMOT	74	1	0	0	0.63243243		FALSE	0	AMOT	0	0
21361	4.67567568	0	0.21387283	0	1	8	FALSE	SPTAN1	74	1	0	0	0.63243243		FALSE	0	SPTAN1	0	0
21363	4.67567568	0	0.21387283	0	1	8	FALSE	CEP72	74	1	0	0	0.63243243		FALSE	0	CEP72	0	0
21365	4.67567568	0	0.21387283	0	1	8	FALSE	CSNK1E	74	1	0	0	0.63243243		FALSE	0	CSNK1E	0	0
21367	4.67567568	0	0.21387283	0	1	8	FALSE	CEP131	74	1	0	0	0.63243243		FALSE	0	CEP131	0	0
21369	4.67567568	0	0.21387283	0	1	8	FALSE	RPL36A	74	1	0	0	0.63243243		FALSE	0	RPL36A	0	0
21371	4.67567568	0	0.21387283	0	1	8	FALSE	LATS2	74	1	0	0	0.63243243		FALSE	0	LATS2	0	0
21373	4.67567568	0	0.21387283	0	1	8	FALSE	TUBB6	74	1	0	0	0.63243243		FALSE	0	TUBB6	0	0
21375	4.67567568	0	0.21387283	0	1	8	FALSE	HELZ	74	1	0	0	0.63243243		FALSE	0	HELZ	0	0
21377	3.65315315	0.02910251	0.27373613	0	2	8	FALSE	STK4	109.5	2	0	0	0.73468468		FALSE	0	STK4	129900	0.5
21379	4.67567568	0	0.21387283	0	1	8	FALSE	IGF2BP2	74	1	0	0	0.63243243		FALSE	0	IGF2BP2	0	0
21381	4.67567568	0	0.21387283	0	1	8	FALSE	CPEB4	74	1	0	0	0.63243243		FALSE	0	CPEB4	0	0
21383	4.67567568	0	0.21387283	0	1	8	FALSE	RASSF5	74	1	0	0	0.63243243		FALSE	0	RASSF5	0	0
21385	4.67567568	0	0.21387283	0	1	8	FALSE	NYNRIN	74	1	0	0	0.63243243		FALSE	0	NYNRIN	0	0
21387	4.67567568	0	0.21387283	0	1	8	FALSE	SEMG1	74	1	0	0	0.63243243		FALSE	0	SEMG1	0	0
21389	4.67567568	0	0.21387283	0	1	8	FALSE	PTPN14	74	1	0	0	0.63243243		FALSE	0	PTPN14	0	0
21391	4.67567568	0	0.21387283	0	1	8	FALSE	CCDC138	74	1	0	0	0.63243243		FALSE	0	CCDC138	0	0
21393	4.67567568	0	0.21387283	0	1	8	FALSE	KIAA0753	74	1	0	0	0.63243243		FALSE	0	KIAA0753	0	0
21395	4.67567568	0	0.21387283	0	1	8	FALSE	STK3	74	1	0	0	0.63243243		FALSE	0	STK3	0	0
21397	3.35472973	0.03075664	0.29808661	0	12	7	FALSE	SGK3	3.41666667	12	0	0	0.76452703		FALSE	0	SGK3	157150	0.11507937
21398	4.3536036	0	0.22969477	0	1	8	FALSE	SLC9A3R2	12	1	0	0	0.66463964		FALSE	0	SLC9A3R2	0	0
21401	4.3536036	0	0.22969477	0	1	8	FALSE	ITCH	12	1	0	0	0.66463964		FALSE	0	ITCH	0	0
21403	4.3536036	0	0.22969477	0	1	8	FALSE	PDK1	12	1	0	0	0.66463964		FALSE	0	PDK1	0	0
21405	4.33333333	0.00225492	0.23076923	0	2	8	FALSE	NEDD4L	11.5	2	0	0	0.66666667		FALSE	0	NEDD4L	16992	0.55263158
21407	4.3536036	0	0.22969477	0	1	8	FALSE	GSK3A	12	1	0	0	0.66463964		FALSE	0	GSK3A	0	0
21410	4.3536036	0	0.22969477	0	1	8	FALSE	GSK3B	12	1	0	0	0.66463964		FALSE	0	GSK3B	0	0
21413	3.48536036	0.02685944	0.28691438	0	13	7	FALSE	STX10	2.30769231	13	0	0	0.75146396		FALSE	0	STX10	58740	0.07692308
21414	4.48423423	0	0.22300352	0	1	8	FALSE	VPS51	13	1	0	0	0.65157658		FALSE	0	VPS51	0	0
21416	2.88400901	0.27221312	0.34673955	0	77	5	FALSE	TCF12	1.49350649	77	0	0	0.8115991		FALSE	0	TCF12	977108	0.01974026
21417	3.88288288	0	0.2575406	0	1	6	FALSE	C1orf109	77	1	0	0	0.71171171		FALSE	0	C1orf109	0	0
21419	3.88288288	0	0.2575406	0	1	6	FALSE	Q1RLL8	77	1	0	0	0.71171171		FALSE	0	Q1RLL8	0	0
21421	3.88288288	0	0.2575406	0	1	6	FALSE	SPG21	77	1	0	0	0.71171171		FALSE	0	SPG21	0	0
21423	3.88288288	0	0.2575406	0	1	6	FALSE	MYF6	77	1	0	0	0.71171171		FALSE	0	MYF6	0	0
21425	3.88288288	0	0.2575406	0	1	6	FALSE	MAPKBP1	77	1	0	0	0.71171171		FALSE	0	MAPKBP1	0	0
21427	3.88288288	0	0.2575406	0	1	6	FALSE	FOXH1	77	1	0	0	0.71171171		FALSE	0	FOXH1	0	0
21429	3.88288288	0	0.2575406	0	1	6	FALSE	TCF23	77	1	0	0	0.71171171		FALSE	0	TCF23	0	0
21431	3.88288288	0	0.2575406	0	1	6	FALSE	VPS28	77	1	0	0	0.71171171		FALSE	0	VPS28	0	0
21433	3.88288288	0	0.2575406	0	1	6	FALSE	EDRF1	77	1	0	0	0.71171171		FALSE	0	EDRF1	0	0
21435	3.88288288	0	0.2575406	0	1	6	FALSE	Q8WVZ3	77	1	0	0	0.71171171		FALSE	0	Q8WVZ3	0	0
21437	3.88288288	0	0.2575406	0	1	6	FALSE	TRIM72	77	1	0	0	0.71171171		FALSE	0	TRIM72	0	0
21439	3.88288288	0	0.2575406	0	1	6	FALSE	MORN4	77	1	0	0	0.71171171		FALSE	0	MORN4	0	0
21441	3.88288288	0	0.2575406	0	1	6	FALSE	NEUROG3	77	1	0	0	0.71171171		FALSE	0	NEUROG3	0	0
21443	3.88288288	0	0.2575406	0	1	6	FALSE	CRCP	77	1	0	0	0.71171171		FALSE	0	CRCP	0	0
21445	3.88288288	0	0.2575406	0	1	6	FALSE	STRN3	77	1	0	0	0.71171171		FALSE	0	STRN3	0	0
21447	3.88288288	0	0.2575406	0	1	6	FALSE	OSGIN1	77	1	0	0	0.71171171		FALSE	0	OSGIN1	0	0
21449	3.88288288	0	0.2575406	0	1	6	FALSE	TAF4	77	1	0	0	0.71171171		FALSE	0	TAF4	0	0
21451	3.88288288	0	0.2575406	0	1	6	FALSE	TWIST2	77	1	0	0	0.71171171		FALSE	0	TWIST2	0	0
21453	3.88288288	0	0.2575406	0	1	6	FALSE	C16orf45	77	1	0	0	0.71171171		FALSE	0	C16orf45	0	0
21455	3.88288288	0	0.2575406	0	1	6	FALSE	ID1	77	1	0	0	0.71171171		FALSE	0	ID1	0	0
21457	3.88288288	0	0.2575406	0	1	6	FALSE	C6orf165	77	1	0	0	0.71171171		FALSE	0	C6orf165	0	0
21459	3.88288288	0	0.2575406	0	1	6	FALSE	HEXIM2	77	1	0	0	0.71171171		FALSE	0	HEXIM2	0	0
21461	3.88288288	0	0.2575406	0	1	6	FALSE	TBP	77	1	0	0	0.71171171		FALSE	0	TBP	0	0
21463	3.88288288	0	0.2575406	0	1	6	FALSE	TSNAX	77	1	0	0	0.71171171		FALSE	0	TSNAX	0	0
21465	3.88288288	0	0.2575406	0	1	6	FALSE	HOPX	77	1	0	0	0.71171171		FALSE	0	HOPX	0	0
21467	3.88288288	0	0.2575406	0	1	6	FALSE	NCOR1	77	1	0	0	0.71171171		FALSE	0	NCOR1	0	0
21469	3.88288288	0	0.2575406	0	1	6	FALSE	LAMTOR5	77	1	0	0	0.71171171		FALSE	0	LAMTOR5	0	0
21471	3.88288288	0	0.2575406	0	1	6	FALSE	SMAD3	77	1	0	0	0.71171171		FALSE	0	SMAD3	0	0
21473	3.66441441	0.01298641	0.2728949	0	2	6	FALSE	ID2	79.5	2	0	0	0.73355856		FALSE	0	ID2	40772	0.50320513
21475	3.88288288	0	0.2575406	0	1	6	FALSE	TCF3	77	1	0	0	0.71171171		FALSE	0	TCF3	0	0
21477	3.69594595	0.01127381	0.27056673	0	2	6	FALSE	EP300	75.5	2	0	0	0.73040541		FALSE	0	EP300	89540	0.50680272
21479	3.88288288	0	0.2575406	0	1	6	FALSE	STK16	77	1	0	0	0.71171171		FALSE	0	STK16	0	0
21481	3.88288288	0	0.2575406	0	1	6	FALSE	NAGK	77	1	0	0	0.71171171		FALSE	0	NAGK	0	0
21484	3.88288288	0	0.2575406	0	1	6	FALSE	PRSS23	77	1	0	0	0.71171171		FALSE	0	PRSS23	0	0
21486	3.88288288	0	0.2575406	0	1	6	FALSE	LYSMD1	77	1	0	0	0.71171171		FALSE	0	LYSMD1	0	0
21488	3.88288288	0	0.2575406	0	1	6	FALSE	ZWINT	77	1	0	0	0.71171171		FALSE	0	ZWINT	0	0
21490	3.80405405	0.01097808	0.26287744	0	2	6	FALSE	CREBBP	56	2	0	0	0.71959459		FALSE	0	CREBBP	35988	0.5
21492	3.88288288	0	0.2575406	0	1	6	FALSE	SMAD2	77	1	0	0	0.71171171		FALSE	0	SMAD2	0	0
21494	3.88288288	0	0.2575406	0	1	6	FALSE	Q548N1	77	1	0	0	0.71171171		FALSE	0	Q548N1	0	0
21498	3.4268018	0.02729647	0.29181729	0	8	5	FALSE	TTC39B	3.625	8	0	0	0.75731982		FALSE	0	TTC39B	120358	0.13125
21501	4.42567568	0	0.2259542	0	1	6	FALSE	MTIF2	8	1	0	0	0.65743243		FALSE	0	MTIF2	0	0
21503	4.42567568	0	0.2259542	0	1	6	FALSE	FDXR	8	1	0	0	0.65743243		FALSE	0	FDXR	0	0
21505	4.42567568	0	0.2259542	0	1	6	FALSE	PREPL	8	1	0	0	0.65743243		FALSE	0	PREPL	0	0
21507	4.42567568	0	0.2259542	0	1	6	FALSE	HSPD1	8	1	0	0	0.65743243		FALSE	0	HSPD1	0	0
21509	3.74887387	0.08035061	0.26674677	0	35	7	FALSE	WT1	1.37142857	35	0	0	0.72511261		FALSE	0	WT1	495486	0.04642857
21510	4.74774775	0	0.21062619	0	1	8	FALSE	EZH2	35	1	0	0	0.62522523	mRNAup	FALSE	0	EZH2	0	0
21512	4.74774775	0	0.21062619	0	1	8	FALSE	DVL3	35	1	0	0	0.62522523		FALSE	0	DVL3	0	0
21514	4.74774775	0	0.21062619	0	1	8	FALSE	TP63	35	1	0	0	0.62522523		FALSE	0	TP63	0	0
21516	4.74774775	0	0.21062619	0	1	8	FALSE	ZNF205	35	1	0	0	0.62522523		FALSE	0	ZNF205	0	0
21519	4.74774775	0	0.21062619	0	1	8	FALSE	PAX2	35	1	0	0	0.62522523		FALSE	0	PAX2	0	0
21521	4.74774775	0	0.21062619	0	1	8	FALSE	THRSP	35	1	0	0	0.62522523		FALSE	0	THRSP	0	0
21523	4.74774775	0	0.21062619	0	1	8	FALSE	AREG	35	1	0	0	0.62522523		FALSE	0	AREG	0	0
21525	4.66666667	0.00307107	0.21428571	0	2	8	FALSE	KRTAP10-3	30.5	2	0	0	0.63333333		FALSE	0	KRTAP10-3	35170	0.51754386
21528	4.74774775	0	0.21062619	0	1	8	FALSE	KLK7	35	1	0	0	0.62522523		FALSE	0	KLK7	0	0
21531	4.74774775	0	0.21062619	0	1	8	FALSE	SUZ12	35	1	0	0	0.62522523		FALSE	0	SUZ12	0	0
21534	4.74774775	0	0.21062619	0	1	8	FALSE	TAOK1	35	1	0	0	0.62522523		FALSE	0	TAOK1	0	0
21536	4.74774775	0	0.21062619	0	1	8	FALSE	DIRAS3	35	1	0	0	0.62522523		FALSE	0	DIRAS3	0	0
21538	4.74774775	0	0.21062619	0	1	8	FALSE	TP73	35	1	0	0	0.62522523		FALSE	0	TP73	0	0
21540	4.74774775	0	0.21062619	0	1	8	FALSE	CCL5	35	1	0	0	0.62522523		FALSE	0	CCL5	0	0
21542	4.74774775	0	0.21062619	0	1	8	FALSE	HSPA4	35	1	0	0	0.62522523		FALSE	0	HSPA4	0	0
21544	4.74774775	0	0.21062619	0	1	8	FALSE	CASZ1	35	1	0	0	0.62522523		FALSE	0	CASZ1	0	0
21546	4.74774775	0	0.21062619	0	1	8	FALSE	NPM3	35	1	0	0	0.62522523		FALSE	0	NPM3	0	0
21548	4.74774775	0	0.21062619	0	1	8	FALSE	EGR1	35	1	0	0	0.62522523		FALSE	0	EGR1	0	0
21550	4.74774775	0	0.21062619	0	1	8	FALSE	DNMT1	35	1	0	0	0.62522523		FALSE	0	DNMT1	0	0
21552	4.74774775	0	0.21062619	0	1	8	FALSE	FHL2	35	1	0	0	0.62522523		FALSE	0	FHL2	0	0
21555	4.65990991	0.00626393	0.21459642	0	3	8	FALSE	KRT40	28.66666667	3	0	0	0.63400901		FALSE	0	KRT40	70368	0.46892655
21557	4.74774775	0	0.21062619	0	1	8	FALSE	NAT2	35	1	0	0	0.62522523		FALSE	0	NAT2	0	0
21559	5.28265766	1.77E-06	0.18929866	0	2	7	FALSE	ZNF404	3	2	0	0	0.57173423		FALSE	0	ZNF404	12	0.66666667
21561	4.51801802	0	0.22133599	0	1	8	FALSE	TRAF2	38	1	0	0	0.6481982		FALSE	0	TRAF2	0	0
21563	4.51801802	0	0.22133599	0	1	8	FALSE	DCUN1D1	38	1	0	0	0.6481982		FALSE	0	DCUN1D1	0	0
21565	4.51801802	0	0.22133599	0	1	8	FALSE	TNFRSF1B	38	1	0	0	0.6481982		FALSE	0	TNFRSF1B	0	0
21567	4.51801802	0	0.22133599	0	1	8	FALSE	SH2D2A	38	1	0	0	0.6481982		FALSE	0	SH2D2A	0	0
21569	4.51801802	0	0.22133599	0	1	8	FALSE	RIN3	38	1	0	0	0.6481982		FALSE	0	RIN3	0	0
21571	4.10585586	0.00572756	0.24355458	0	3	8	FALSE	HSP90AA1	20.33333333	3	0	0	0.68941441		FALSE	0	HSP90AA1	44584	0.35151515
21573	3.44369369	0.06259704	0.29038587	0	5	6	FALSE	ELAVL1	48	5	0	0	0.75563063		FALSE	0	ELAVL1	370552	0.20524017
21575	4.51801802	0	0.22133599	0	1	8	FALSE	TENC1	38	1	0	0	0.6481982		FALSE	0	TENC1	0	0
21577	4.51801802	0	0.22133599	0	1	8	FALSE	ASB6	38	1	0	0	0.6481982		FALSE	0	ASB6	0	0
21579	3.78603604	0.0120365	0.26412849	0	3	6	FALSE	MOV10	37.33333333	3	0	0	0.7213964		FALSE	0	MOV10	64968	0.3427673
21581	3.86936937	0.00483716	0.25844005	0	2	6	FALSE	NXF1	42	2	0	0	0.71306306		FALSE	0	NXF1	23892	0.50617284
21583	5.77027027	0	0.17330211	0	1	8	FALSE	SNTA1	7	1	0	0	0.52297297		FALSE	0	SNTA1	0	0
21585	5.77027027	0	0.17330211	0	1	8	FALSE	GLP1R	7	1	0	0	0.52297297		FALSE	0	GLP1R	0	0
21587	4.07207207	0	0.24557522	0	1	8	FALSE	-	82	1	0	0	0.69279279		FALSE	0	-	0	0
21590	4.07207207	0	0.24557522	0	1	8	FALSE	SRCIN1	82	1	0	0	0.69279279		FALSE	0	SRCIN1	0	0
21592	4.07207207	0	0.24557522	0	1	8	FALSE	NEDD9	82	1	0	0	0.69279279		FALSE	0	NEDD9	0	0
21594	4.07207207	0	0.24557522	0	1	8	FALSE	TNK2	82	1	0	0	0.69279279		FALSE	0	TNK2	0	0
21596	4.07207207	0	0.24557522	0	1	8	FALSE	CRK	82	1	0	0	0.69279279		FALSE	0	CRK	0	0
21598	4.07207207	0	0.24557522	0	1	8	FALSE	CD2AP	82	1	0	0	0.69279279		FALSE	0	CD2AP	0	0
21600	4.07207207	0	0.24557522	0	1	8	FALSE	PTK2	82	1	0	0	0.69279279		FALSE	0	PTK2	0	0
21604	4.07207207	0	0.24557522	0	1	8	FALSE	MAPK8	82	1	0	0	0.69279279		FALSE	0	MAPK8	0	0
21606	3.97297297	0.00310723	0.25170068	0	2	8	FALSE	CDC42	55	2	0	0	0.7027027		FALSE	0	CDC42	12190	0.5046729
21609	4.07207207	0	0.24557522	0	1	8	FALSE	E2F2	82	1	0	0	0.69279279		FALSE	0	E2F2	0	0
21611	4.07207207	0	0.24557522	0	1	8	FALSE	CASP3	82	1	0	0	0.69279279		FALSE	0	CASP3	0	0
21613	4.07207207	0	0.24557522	0	1	8	FALSE	EPN1	82	1	0	0	0.69279279		FALSE	0	EPN1	0	0
21615	4.07207207	0	0.24557522	0	1	8	FALSE	SH3KBP1	82	1	0	0	0.69279279		FALSE	0	SH3KBP1	0	0
21617	4.07207207	0	0.24557522	0	1	8	FALSE	TUBA4A	82	1	0	0	0.69279279		FALSE	0	TUBA4A	0	0
21619	4.07207207	0	0.24557522	0	1	8	FALSE	PTPRA	82	1	0	0	0.69279279		FALSE	0	PTPRA	0	0
21621	4.07207207	0	0.24557522	0	1	8	FALSE	ALK	82	1	0	0	0.69279279		FALSE	0	ALK	0	0
21623	4.07207207	0	0.24557522	0	1	8	FALSE	ZYX	82	1	0	0	0.69279279		FALSE	0	ZYX	0	0
21625	4.07207207	0	0.24557522	0	1	8	FALSE	HYOU1	82	1	0	0	0.69279279		FALSE	0	HYOU1	0	0
21628	4.05405405	0.00230645	0.24666667	0	2	8	FALSE	ACTB	45	2	0	0	0.69459459		FALSE	0	ACTB	13148	0.5
21630	4.07207207	0	0.24557522	0	1	8	FALSE	ITGAV	82	1	0	0	0.69279279		FALSE	0	ITGAV	0	0
21635	4.07207207	0	0.24557522	0	1	8	FALSE	TNS3	82	1	0	0	0.69279279		FALSE	0	TNS3	0	0
21638	4.07207207	0	0.24557522	0	1	8	FALSE	PPAP2B	82	1	0	0	0.69279279		FALSE	0	PPAP2B	0	0
21640	4.07207207	0	0.24557522	0	1	8	FALSE	NPHP1	82	1	0	0	0.69279279		FALSE	0	NPHP1	0	0
21642	4.07207207	0	0.24557522	0	1	8	FALSE	SH2D3A	82	1	0	0	0.69279279		FALSE	0	SH2D3A	0	0
21644	4.07207207	0	0.24557522	0	1	8	FALSE	SRC	82	1	0	0	0.69279279		FALSE	0	SRC	0	0
21646	4.01801802	0.00198182	0.24887892	0	2	8	FALSE	MAPK14	52.5	2	0	0	0.6981982		FALSE	0	MAPK14	3852	0.50490196
21648	4.07207207	0	0.24557522	0	1	8	FALSE	UHRF2	82	1	0	0	0.69279279		FALSE	0	UHRF2	0	0
21650	3.84684685	0.00680077	0.25995316	0	2	8	FALSE	SFN	78	2	0	0	0.71531532		FALSE	0	SFN	83550	0.51333333
21652	4.07207207	0	0.24557522	0	1	8	FALSE	JUB	82	1	0	0	0.69279279		FALSE	0	JUB	0	0
21655	4.33783784	4.66E-04	0.2305296	0	2	8	FALSE	KRAS	24	2	0	0	0.66621622		FALSE	0	KRAS	1640	0.51111111
21657	4.47747748	0	0.22334004	0	1	8	FALSE	PCGF3	16	1	0	0	0.65225225		FALSE	0	PCGF3	0	0
21659	4.11486486	9.95E-04	0.24302135	0	2	8	FALSE	RNF2	49.5	2	0	0	0.68851351		FALSE	0	RNF2	4988	0.51052632
21661	4.47747748	0	0.22334004	0	1	8	FALSE	RYBP	16	1	0	0	0.65225225		FALSE	0	RYBP	0	0
21663	4.47747748	0	0.22334004	0	1	8	FALSE	HDAC8	16	1	0	0	0.65225225		FALSE	0	HDAC8	0	0
21665	4.47747748	0	0.22334004	0	1	8	FALSE	CTBP1	16	1	0	0	0.65225225		FALSE	0	CTBP1	0	0
21667	4.47747748	0	0.22334004	0	1	8	FALSE	PCGF1	16	1	0	0	0.65225225		FALSE	0	PCGF1	0	0
21669	4.47747748	0	0.22334004	0	1	8	FALSE	YAF2	16	1	0	0	0.65225225		FALSE	0	YAF2	0	0
21672	4.47747748	0	0.22334004	0	1	8	FALSE	LDHD	16	1	0	0	0.65225225		FALSE	0	LDHD	0	0
21674	3.81306306	0.00568179	0.26225635	0	2	8	FALSE	PSMA3	76.5	2	0	0	0.71869369		FALSE	0	PSMA3	33276	0.5
21676	5.71396396	0	0.17500985	0	1	10	FALSE	ZAK	8	1	0	0	0.5286036		FALSE	0	ZAK	0	0
21679	5.71396396	0	0.17500985	0	1	10	FALSE	MAP3K1	8	1	0	0	0.5286036	mRNAdown	FALSE	0	MAP3K1	0	0
21682	5.71396396	0	0.17500985	0	1	10	FALSE	ACO1	8	1	0	0	0.5286036		FALSE	0	ACO1	0	0
21686	3.31531532	0.0285584	0.30163043	0	4	6	FALSE	NTRK1	78.5	4	0	0	0.76846847		FALSE	0	NTRK1	166516	0.25833333
21688	4.49324324	0	0.22255639	0	1	8	FALSE	SCN2B	9	1	0	0	0.65067568		FALSE	0	SCN2B	0	0
21690	4.13063063	4.41E-04	0.24209378	0	2	8	FALSE	SNW1	46	2	0	0	0.68693694		FALSE	0	SNW1	2272	0.51136364
21694	4.37162162	0	0.22874807	0	1	8	FALSE	CEP250	32	1	0	0	0.66283784		FALSE	0	CEP250	0	0
21696	4.37162162	0	0.22874807	0	1	8	FALSE	DYNLT1	32	1	0	0	0.66283784		FALSE	0	DYNLT1	0	0
21700	4.08783784	8.24E-04	0.2446281	0	2	8	FALSE	RACK1	57.5	2	0	0	0.69121622		FALSE	0	RACK1	7762	0.52803738
21702	4.37162162	0	0.22874807	0	1	8	FALSE	CDK5RAP3	32	1	0	0	0.66283784		FALSE	0	CDK5RAP3	0	0
21704	4.37162162	0	0.22874807	0	1	8	FALSE	FAM170A	32	1	0	0	0.66283784		FALSE	0	FAM170A	0	0
21706	4.37162162	0	0.22874807	0	1	8	FALSE	RALYL	32	1	0	0	0.66283784		FALSE	0	RALYL	0	0
21709	4.08783784	8.24E-04	0.2446281	0	2	8	FALSE	WWOX	57.5	2	0	0	0.69121622		FALSE	0	WWOX	7762	0.52803738
21711	4.37162162	0	0.22874807	0	1	8	FALSE	LMNA	32	1	0	0	0.66283784		FALSE	0	LMNA	0	0
21713	4.37162162	0	0.22874807	0	1	8	FALSE	DHX16	32	1	0	0	0.66283784		FALSE	0	DHX16	0	0
21715	4.37162162	0	0.22874807	0	1	8	FALSE	PFDN1	32	1	0	0	0.66283784		FALSE	0	PFDN1	0	0
21717	4.37162162	0	0.22874807	0	1	8	FALSE	LYST	32	1	0	0	0.66283784		FALSE	0	LYST	0	0
21719	4.37162162	0	0.22874807	0	1	8	FALSE	USB1	32	1	0	0	0.66283784		FALSE	0	USB1	0	0
21721	4.37162162	0	0.22874807	0	1	8	FALSE	TUBGCP3	32	1	0	0	0.66283784		FALSE	0	TUBGCP3	0	0
21724	4.37162162	0	0.22874807	0	1	8	FALSE	DNAJB8	32	1	0	0	0.66283784		FALSE	0	DNAJB8	0	0
21728	4.37162162	0	0.22874807	0	1	8	FALSE	FOXJ2	32	1	0	0	0.66283784		FALSE	0	FOXJ2	0	0
21730	4.37162162	0	0.22874807	0	1	8	FALSE	IKZF3	32	1	0	0	0.66283784	mRNAup	FALSE	0	IKZF3	0	0
21732	4.37162162	0	0.22874807	0	1	8	FALSE	LENG1	32	1	0	0	0.66283784		FALSE	0	LENG1	0	0
21734	4.37162162	0	0.22874807	0	1	8	FALSE	CRP	32	1	0	0	0.66283784		FALSE	0	CRP	0	0
21737	4.50225225	0	0.22211106	0	1	8	FALSE	MAGEA11	5	1	0	0	0.64977477		FALSE	0	MAGEA11	0	0
21739	4.36936937	0	0.22886598	0	1	8	FALSE	HECW2	26	1	0	0	0.66306306		FALSE	0	HECW2	0	0
21741	4.36936937	0	0.22886598	0	1	8	FALSE	TCEA1	26	1	0	0	0.66306306		FALSE	0	TCEA1	0	0
21743	4.36936937	0	0.22886598	0	1	8	FALSE	ACBD3	26	1	0	0	0.66306306		FALSE	0	ACBD3	0	0
21745	4.36936937	0	0.22886598	0	1	8	FALSE	MUS81	26	1	0	0	0.66306306		FALSE	0	MUS81	0	0
21747	4.36936937	0	0.22886598	0	1	8	FALSE	EEF2K	26	1	0	0	0.66306306		FALSE	0	EEF2K	0	0
21749	4.36936937	0	0.22886598	0	1	8	FALSE	WDR36	26	1	0	0	0.66306306		FALSE	0	WDR36	0	0
21751	4.36936937	0	0.22886598	0	1	8	FALSE	ACAT1	26	1	0	0	0.66306306		FALSE	0	ACAT1	0	0
21753	4.31531532	0	0.23173278	0	1	8	FALSE	CPSF7	55	1	0	0	0.66846847		FALSE	0	CPSF7	0	0
21755	4.31531532	0	0.23173278	0	1	8	FALSE	TCTN3	55	1	0	0	0.66846847		FALSE	0	TCTN3	0	0
21757	4.65202703	0.02931155	0.21496006	0	26	7	FALSE	FAM74A4	2.15384615	26	0	0	0.6347973		FALSE	0	FAM74A4	250594	0.19230769
21759	4.29054054	0.0067533	0.23307087	0	3	6	FALSE	MEOX2	12	3	0	0	0.67094595		FALSE	0	MEOX2	46572	0.34375
21761	5.64414414	1.15E-06	0.17717478	0	2	8	FALSE	PHC2	25.5	2	0	0	0.53558559		FALSE	0	PHC2	22	0.90740741
21764	5.64414414	1.15E-06	0.17717478	0	2	8	FALSE	PDE4DIP	25.5	2	0	0	0.53558559		FALSE	0	PDE4DIP	22	0.90740741
21766	5.64414414	1.15E-06	0.17717478	0	2	8	FALSE	HMBOX1	25.5	2	0	0	0.53558559		FALSE	0	HMBOX1	22	0.90740741
21775	5.6509009	0	0.17696293	0	1	8	FALSE	TMCC2	26	1	0	0	0.53490991		FALSE	0	TMCC2	0	0
21779	5.64414414	1.15E-06	0.17717478	0	2	8	FALSE	NOTCH2NL	25.5	2	0	0	0.53558559		FALSE	0	NOTCH2NL	22	0.90740741
21781	5.64414414	1.15E-06	0.17717478	0	2	8	FALSE	EMG1	25.5	2	0	0	0.53558559		FALSE	0	EMG1	22	0.90740741
21783	5.64414414	1.15E-06	0.17717478	0	2	8	FALSE	LZTS2	25.5	2	0	0	0.53558559		FALSE	0	LZTS2	22	0.90740741
21785	5.64414414	1.15E-06	0.17717478	0	2	8	FALSE	CEP44	25.5	2	0	0	0.53558559		FALSE	0	CEP44	22	0.90740741
21790	5.64414414	1.15E-06	0.17717478	0	2	8	FALSE	RPGRIP1	25.5	2	0	0	0.53558559		FALSE	0	RPGRIP1	22	0.90740741
21793	5.64414414	1.15E-06	0.17717478	0	2	8	FALSE	KRTAP4-2	25.5	2	0	0	0.53558559		FALSE	0	KRTAP4-2	22	0.90740741
21798	5.65315315	0	0.17689243	0	1	8	FALSE	Q7Z6C6	25	1	0	0	0.53468468		FALSE	0	Q7Z6C6	0	0
21807	6.19144144	0	0.16151328	0	1	10	FALSE	RYK	2	1	0	0	0.48085586		FALSE	0	RYK	0	0
21809	4.1463964	0	0.24117328	0	1	8	FALSE	MYBBP1A	83	1	0	0	0.68536036		FALSE	0	MYBBP1A	0	0
21811	4.1463964	0	0.24117328	0	1	8	FALSE	CERK	83	1	0	0	0.68536036		FALSE	0	CERK	0	0
21813	4.1463964	0	0.24117328	0	1	8	FALSE	CUL7	83	1	0	0	0.68536036		FALSE	0	CUL7	0	0
21816	4.1463964	0	0.24117328	0	1	8	FALSE	DDX21	83	1	0	0	0.68536036		FALSE	0	DDX21	0	0
21818	4.1463964	0	0.24117328	0	1	8	FALSE	CTNNBL1	83	1	0	0	0.68536036		FALSE	0	CTNNBL1	0	0
21820	4.1463964	0	0.24117328	0	1	8	FALSE	PPP2R5E	83	1	0	0	0.68536036		FALSE	0	PPP2R5E	0	0
21822	4.1463964	0	0.24117328	0	1	8	FALSE	MSH2	83	1	0	0	0.68536036	mRNAup	FALSE	0	MSH2	0	0
21825	4.01351351	0.00436036	0.24915825	0	2	8	FALSE	HNRNPU	72	2	0	0	0.69864865		FALSE	0	HNRNPU	18352	0.50714286
21827	4.1463964	0	0.24117328	0	1	8	FALSE	RBM14	83	1	0	0	0.68536036		FALSE	0	RBM14	0	0
21829	4.1463964	0	0.24117328	0	1	8	FALSE	NCSTN	83	1	0	0	0.68536036		FALSE	0	NCSTN	0	0
21833	4.1463964	0	0.24117328	0	1	8	FALSE	KAT5	83	1	0	0	0.68536036		FALSE	0	KAT5	0	0
21835	4.1463964	0	0.24117328	0	1	8	FALSE	OBSL1	83	1	0	0	0.68536036		FALSE	0	OBSL1	0	0
21837	4.1463964	0	0.24117328	0	1	8	FALSE	BMI1	83	1	0	0	0.68536036		FALSE	0	BMI1	0	0
21839	4.1463964	0	0.24117328	0	1	8	FALSE	RANBP2	83	1	0	0	0.68536036		FALSE	0	RANBP2	0	0
21841	4.1463964	0	0.24117328	0	1	8	FALSE	HDAC11	83	1	0	0	0.68536036		FALSE	0	HDAC11	0	0
21843	4.1463964	0	0.24117328	0	1	8	FALSE	SNIP1	83	1	0	0	0.68536036		FALSE	0	SNIP1	0	0
21845	4.1463964	0	0.24117328	0	1	8	FALSE	FANCC	83	1	0	0	0.68536036		FALSE	0	FANCC	0	0
21848	4.1463964	0	0.24117328	0	1	8	FALSE	MFAP1	83	1	0	0	0.68536036		FALSE	0	MFAP1	0	0
21850	4.1463964	0	0.24117328	0	1	8	FALSE	KIAA1524	83	1	0	0	0.68536036		FALSE	0	KIAA1524	0	0
21852	4.1463964	0	0.24117328	0	1	8	FALSE	MND1	83	1	0	0	0.68536036		FALSE	0	MND1	0	0
21856	4.1463964	0	0.24117328	0	1	8	FALSE	XAB2	83	1	0	0	0.68536036		FALSE	0	XAB2	0	0
21858	4.1463964	0	0.24117328	0	1	8	FALSE	FKBP6	83	1	0	0	0.68536036		FALSE	0	FKBP6	0	0
21860	4.1463964	0	0.24117328	0	1	8	FALSE	NOLC1	83	1	0	0	0.68536036		FALSE	0	NOLC1	0	0
21862	4.1463964	0	0.24117328	0	1	8	FALSE	LUC7L2	83	1	0	0	0.68536036		FALSE	0	LUC7L2	0	0
21864	4.1463964	0	0.24117328	0	1	8	FALSE	TSSC4	83	1	0	0	0.68536036		FALSE	0	TSSC4	0	0
21866	4.1463964	0	0.24117328	0	1	8	FALSE	PRPF6	83	1	0	0	0.68536036		FALSE	0	PRPF6	0	0
21868	4.1463964	0	0.24117328	0	1	8	FALSE	SIRT7	83	1	0	0	0.68536036		FALSE	0	SIRT7	0	0
21870	4.1463964	0	0.24117328	0	1	8	FALSE	DDX41	83	1	0	0	0.68536036		FALSE	0	DDX41	0	0
21872	4.1463964	0	0.24117328	0	1	8	FALSE	RBM10	83	1	0	0	0.68536036		FALSE	0	RBM10	0	0
21874	4.1463964	0	0.24117328	0	1	8	FALSE	DDX23	83	1	0	0	0.68536036		FALSE	0	DDX23	0	0
21876	4.20045045	0	0.23806971	0	1	8	FALSE	CRMP1	23	1	0	0	0.67995495		FALSE	0	CRMP1	0	0
21878	4.20045045	0	0.23806971	0	1	8	FALSE	SLX4	23	1	0	0	0.67995495		FALSE	0	SLX4	0	0
21880	4.20045045	0	0.23806971	0	1	8	FALSE	PPP1CA	23	1	0	0	0.67995495		FALSE	0	PPP1CA	0	0
21882	4.20045045	0	0.23806971	0	1	8	FALSE	CLK3	23	1	0	0	0.67995495		FALSE	0	CLK3	0	0
21885	4.20045045	0	0.23806971	0	1	8	FALSE	RBM23	23	1	0	0	0.67995495		FALSE	0	RBM23	0	0
21887	4.20045045	0	0.23806971	0	1	8	FALSE	CNPY3	23	1	0	0	0.67995495		FALSE	0	CNPY3	0	0
21890	4.20045045	0	0.23806971	0	1	8	FALSE	GAR1	23	1	0	0	0.67995495	mRNAup	FALSE	0	GAR1	0	0
21892	4.20045045	0	0.23806971	0	1	8	FALSE	CEP126	23	1	0	0	0.67995495		FALSE	0	CEP126	0	0
21894	4.20045045	0	0.23806971	0	1	8	FALSE	PPP1CC	23	1	0	0	0.67995495		FALSE	0	PPP1CC	0	0
21896	1.5	0	0.66666667	0	1	2	FALSE	TGFB1	2	1	0	0	0.75		FALSE	0	TGFB1	0	0
21899	5.30630631	0	0.18845501	0	1	8	FALSE	HAX1	5	1	0	0	0.56936937		FALSE	0	HAX1	0	0
21901	5.70045045	0	0.17542473	0	1	8	FALSE	TNFSF11	37	1	0	0	0.52995495		FALSE	0	TNFSF11	0	0
21903	5.70045045	0	0.17542473	0	1	8	FALSE	TFPI	37	1	0	0	0.52995495		FALSE	0	TFPI	0	0
21905	5.70045045	0	0.17542473	0	1	8	FALSE	NGF	37	1	0	0	0.52995495		FALSE	0	NGF	0	0
21907	5.70045045	0	0.17542473	0	1	8	FALSE	ELN	37	1	0	0	0.52995495		FALSE	0	ELN	0	0
21909	7.46171171	0	0.13401751	0	1	10	FALSE	Q6FHH8	5	1	0	0	0.35382883		FALSE	0	Q6FHH8	0	0
21912	7.46171171	0	0.13401751	0	1	10	FALSE	MAGEA12	5	1	0	0	0.35382883		FALSE	0	MAGEA12	0	0
21914	5.68468468	0	0.17591125	0	1	10	FALSE	ARNT	13	1	0	0	0.53153153		FALSE	0	ARNT	0	0
21916	5.68468468	0	0.17591125	0	1	10	FALSE	MAP1LC3C	13	1	0	0	0.53153153		FALSE	0	MAP1LC3C	0	0
21918	5.68468468	0	0.17591125	0	1	10	FALSE	MAP1LC3B	13	1	0	0	0.53153153		FALSE	0	MAP1LC3B	0	0
21920	5.68468468	0	0.17591125	0	1	10	FALSE	ATP6V1B1	13	1	0	0	0.53153153		FALSE	0	ATP6V1B1	0	0
21922	5.68468468	0	0.17591125	0	1	10	FALSE	GABARAP	13	1	0	0	0.53153153		FALSE	0	GABARAP	0	0
21925	5.68468468	0	0.17591125	0	1	10	FALSE	AHR	13	1	0	0	0.53153153		FALSE	0	AHR	0	0
21927	5.68468468	0	0.17591125	0	1	10	FALSE	GABARAPL1	13	1	0	0	0.53153153		FALSE	0	GABARAPL1	0	0
21930	4.29279279	0	0.23294858	0	1	8	FALSE	EPAS1	61	1	0	0	0.67072072		FALSE	0	EPAS1	0	0
21933	4.29279279	0	0.23294858	0	1	8	FALSE	IL32	61	1	0	0	0.67072072	mRNAup	FALSE	0	IL32	0	0
21935	4.29279279	0	0.23294858	0	1	8	FALSE	ARSE	61	1	0	0	0.67072072		FALSE	0	ARSE	0	0
21937	4.29279279	0	0.23294858	0	1	8	FALSE	NUCB2	61	1	0	0	0.67072072		FALSE	0	NUCB2	0	0
21940	1	0	1	0	1	1	FALSE	OOSP2	1	1	0	0	1		FALSE	0	OOSP2	0	0
21941	1	0	1	0	1	1	FALSE	ECT2	1	1	0	0	1		FALSE	0	ECT2	0	0
21943	3.79954955	0.00387349	0.26318909	0	2	8	FALSE	PARK2	83	2	0	0	0.72004505		FALSE	0	PARK2	11270	0.50306748
21945	4.31756757	0	0.23161189	0	1	8	FALSE	UBA3	21	1	0	0	0.66824324		FALSE	0	UBA3	0	0
21947	4.31756757	0	0.23161189	0	1	8	FALSE	PDHB	21	1	0	0	0.66824324		FALSE	0	PDHB	0	0
21949	4.31756757	0	0.23161189	0	1	8	FALSE	CAMK1D	21	1	0	0	0.66824324		FALSE	0	CAMK1D	0	0
21951	4.31756757	0	0.23161189	0	1	8	FALSE	RAB1A	21	1	0	0	0.66824324		FALSE	0	RAB1A	0	0
21953	4.31756757	0	0.23161189	0	1	8	FALSE	EIF5	21	1	0	0	0.66824324		FALSE	0	EIF5	0	0
21955	4.31756757	0	0.23161189	0	1	8	FALSE	NAE1	21	1	0	0	0.66824324	mRNAdown	FALSE	0	NAE1	0	0
21957	4.31756757	0	0.23161189	0	1	8	FALSE	COASY	21	1	0	0	0.66824324		FALSE	0	COASY	0	0
21959	4.5	0	0.22222222	0	1	8	FALSE	CASQ2	6	1	0	0	0.65		FALSE	0	CASQ2	0	0
21961	4.5	0	0.22222222	0	1	8	FALSE	SKIL	6	1	0	0	0.65		FALSE	0	SKIL	0	0
21963	4.5	0	0.22222222	0	1	8	FALSE	EAF1	6	1	0	0	0.65		FALSE	0	EAF1	0	0
21965	4.5	0	0.22222222	0	1	8	FALSE	SYNPO	6	1	0	0	0.65		FALSE	0	SYNPO	0	0
21967	4.5	0	0.22222222	0	1	8	FALSE	LRRC46	6	1	0	0	0.65		FALSE	0	LRRC46	0	0
21969	5.66891892	0	0.17640048	0	1	10	FALSE	PRKAR2B	11	1	0	0	0.53310811		FALSE	0	PRKAR2B	0	0
21971	5.66891892	0	0.17640048	0	1	10	FALSE	MAP3K7	11	1	0	0	0.53310811		FALSE	0	MAP3K7	0	0
21973	5.66891892	0	0.17640048	0	1	10	FALSE	PKIA	11	1	0	0	0.53310811		FALSE	0	PKIA	0	0
21975	5.66891892	0	0.17640048	0	1	10	FALSE	GPKOW	11	1	0	0	0.53310811		FALSE	0	GPKOW	0	0
21979	5.66891892	0	0.17640048	0	1	10	FALSE	NEDD4	11	1	0	0	0.53310811		FALSE	0	NEDD4	0	0
21981	5.27702703	0	0.18950064	0	1	10	FALSE	POT1	8	1	0	0	0.5722973		FALSE	0	POT1	0	0
21984	3.8018018	0.00394767	0.26303318	0	2	8	FALSE	STK24	76.5	2	0	0	0.71981982		FALSE	0	STK24	22994	0.5
21987	3.84459459	0	0.26010545	0	1	8	FALSE	NEDD8	145	1	0	0	0.71554054		FALSE	0	NEDD8	0	0
21989	3.84459459	0	0.26010545	0	1	8	FALSE	HADH	145	1	0	0	0.71554054		FALSE	0	HADH	0	0
21991	3.84459459	0	0.26010545	0	1	8	FALSE	SIRT2	145	1	0	0	0.71554054		FALSE	0	SIRT2	0	0
21993	3.84459459	0	0.26010545	0	1	8	FALSE	AMBRA1	145	1	0	0	0.71554054		FALSE	0	AMBRA1	0	0
21995	3.70720721	0.01304655	0.26974484	0	2	6	FALSE	MDM2	90	2	0	0	0.72927928		FALSE	0	MDM2	97916	0.50282486
21997	3.76126126	0.00260798	0.26586826	0	2	8	FALSE	PAK2	86.5	2	0	0	0.72387387		FALSE	0	PAK2	17656	0.50892857
21999	3.84459459	0	0.26010545	0	1	8	FALSE	FN1	145	1	0	0	0.71554054		FALSE	0	FN1	0	0
22001	3.84459459	0	0.26010545	0	1	8	FALSE	IQCB1	145	1	0	0	0.71554054		FALSE	0	IQCB1	0	0
22003	3.84459459	0	0.26010545	0	1	8	FALSE	PCK1	145	1	0	0	0.71554054		FALSE	0	PCK1	0	0
22005	3.84459459	0	0.26010545	0	1	8	FALSE	BAG3	145	1	0	0	0.71554054		FALSE	0	BAG3	0	0
22008	3.84459459	0	0.26010545	0	1	8	FALSE	PSMD6	145	1	0	0	0.71554054		FALSE	0	PSMD6	0	0
22010	3.84459459	0	0.26010545	0	1	8	FALSE	ASB11	145	1	0	0	0.71554054		FALSE	0	ASB11	0	0
22012	3.84459459	0	0.26010545	0	1	8	FALSE	HUWE1	145	1	0	0	0.71554054		FALSE	0	HUWE1	0	0
22014	3.84459459	0	0.26010545	0	1	8	FALSE	PLK1	145	1	0	0	0.71554054		FALSE	0	PLK1	0	0
22016	3.84459459	0	0.26010545	0	1	8	FALSE	PSMC1	145	1	0	0	0.71554054		FALSE	0	PSMC1	0	0
22018	3.84459459	0	0.26010545	0	1	8	FALSE	RAD23A	145	1	0	0	0.71554054		FALSE	0	RAD23A	0	0
22020	3.84459459	0	0.26010545	0	1	8	FALSE	INSIG2	145	1	0	0	0.71554054		FALSE	0	INSIG2	0	0
22022	3.84459459	0	0.26010545	0	1	8	FALSE	NME2	145	1	0	0	0.71554054		FALSE	0	NME2	0	0
22024	3.84459459	0	0.26010545	0	1	8	FALSE	SLX1A	145	1	0	0	0.71554054		FALSE	0	SLX1A	0	0
22027	3.84459459	0	0.26010545	0	1	8	FALSE	IKBKE	145	1	0	0	0.71554054		FALSE	0	IKBKE	0	0
22029	3.84459459	0	0.26010545	0	1	8	FALSE	SMEK1	145	1	0	0	0.71554054		FALSE	0	SMEK1	0	0
22031	3.84459459	0	0.26010545	0	1	8	FALSE	SLX1B	145	1	0	0	0.71554054		FALSE	0	SLX1B	0	0
22034	3.84459459	0	0.26010545	0	1	8	FALSE	USP43	145	1	0	0	0.71554054		FALSE	0	USP43	0	0
22037	3.84459459	0	0.26010545	0	1	8	FALSE	HUS1	145	1	0	0	0.71554054		FALSE	0	HUS1	0	0
22039	3.84459459	0	0.26010545	0	1	8	FALSE	SHFM1	145	1	0	0	0.71554054		FALSE	0	SHFM1	0	0
22041	3.84459459	0	0.26010545	0	1	8	FALSE	TNIK	145	1	0	0	0.71554054		FALSE	0	TNIK	0	0
22043	3.84459459	0	0.26010545	0	1	8	FALSE	TRAF6	145	1	0	0	0.71554054		FALSE	0	TRAF6	0	0
22046	3.84459459	0	0.26010545	0	1	8	FALSE	PSMA6	145	1	0	0	0.71554054		FALSE	0	PSMA6	0	0
22048	3.84459459	0	0.26010545	0	1	8	FALSE	HLA-C	145	1	0	0	0.71554054		FALSE	0	HLA-C	0	0
22050	3.84459459	0	0.26010545	0	1	8	FALSE	NFKBIA	145	1	0	0	0.71554054		FALSE	0	NFKBIA	0	0
22053	3.84459459	0	0.26010545	0	1	8	FALSE	ASNA1	145	1	0	0	0.71554054		FALSE	0	ASNA1	0	0
22055	3.84459459	0	0.26010545	0	1	8	FALSE	ATG5	145	1	0	0	0.71554054		FALSE	0	ATG5	0	0
22057	3.84459459	0	0.26010545	0	1	8	FALSE	PSMB5	145	1	0	0	0.71554054		FALSE	0	PSMB5	0	0
22060	3.84459459	0	0.26010545	0	1	8	FALSE	EXOSC5	145	1	0	0	0.71554054		FALSE	0	EXOSC5	0	0
22062	3.84459459	0	0.26010545	0	1	8	FALSE	VHL	145	1	0	0	0.71554054		FALSE	0	VHL	0	0
22064	3.84459459	0	0.26010545	0	1	8	FALSE	KIF5B	145	1	0	0	0.71554054		FALSE	0	KIF5B	0	0
22066	3.84459459	0	0.26010545	0	1	8	FALSE	IKBKAP	145	1	0	0	0.71554054		FALSE	0	IKBKAP	0	0
22068	3.84459459	0	0.26010545	0	1	8	FALSE	FKBP8	145	1	0	0	0.71554054		FALSE	0	FKBP8	0	0
22070	3.84459459	0	0.26010545	0	1	8	FALSE	TERF1	145	1	0	0	0.71554054		FALSE	0	TERF1	0	0
22072	3.84459459	0	0.26010545	0	1	8	FALSE	DYNC1I2	145	1	0	0	0.71554054		FALSE	0	DYNC1I2	0	0
22074	3.84459459	0	0.26010545	0	1	8	FALSE	AMFR	145	1	0	0	0.71554054		FALSE	0	AMFR	0	0
22076	3.84459459	0	0.26010545	0	1	8	FALSE	HOMER3	145	1	0	0	0.71554054		FALSE	0	HOMER3	0	0
22078	3.84459459	0	0.26010545	0	1	8	FALSE	MPG	145	1	0	0	0.71554054		FALSE	0	MPG	0	0
22080	3.84459459	0	0.26010545	0	1	8	FALSE	ECM29	145	1	0	0	0.71554054		FALSE	0	ECM29	0	0
22082	3.84459459	0	0.26010545	0	1	8	FALSE	SIRT1	145	1	0	0	0.71554054		FALSE	0	SIRT1	0	0
22084	3.52027027	0.01123924	0.2840691	0	2	6	FALSE	PSMA1	111	2	0	0	0.74797297		FALSE	0	PSMA1	57130	0.50691244
22086	3.84459459	0	0.26010545	0	1	8	FALSE	UBQLN2	145	1	0	0	0.71554054		FALSE	0	UBQLN2	0	0
22089	3.84459459	0	0.26010545	0	1	8	FALSE	NOS2	145	1	0	0	0.71554054		FALSE	0	NOS2	0	0
22091	3.84459459	0	0.26010545	0	1	8	FALSE	ABCE1	145	1	0	0	0.71554054		FALSE	0	ABCE1	0	0
22093	3.84459459	0	0.26010545	0	1	8	FALSE	FBXW4	145	1	0	0	0.71554054		FALSE	0	FBXW4	0	0
22095	3.84459459	0	0.26010545	0	1	8	FALSE	SYVN1	145	1	0	0	0.71554054		FALSE	0	SYVN1	0	0
22097	4.19144144	0	0.23858141	0	1	8	FALSE	TULP3	28	1	0	0	0.68085586		FALSE	0	TULP3	0	0
22100	4.19144144	0	0.23858141	0	1	8	FALSE	OSBPL5	28	1	0	0	0.68085586		FALSE	0	OSBPL5	0	0
22103	4.19144144	0	0.23858141	0	1	8	FALSE	ARL1	28	1	0	0	0.68085586		FALSE	0	ARL1	0	0
22106	4.19144144	0	0.23858141	0	1	8	FALSE	CASP10	28	1	0	0	0.68085586		FALSE	0	CASP10	0	0
22108	4.19144144	0	0.23858141	0	1	8	FALSE	IRF3	28	1	0	0	0.68085586		FALSE	0	IRF3	0	0
22110	4.19144144	0	0.23858141	0	1	8	FALSE	ZMAT3	28	1	0	0	0.68085586		FALSE	0	ZMAT3	0	0
22113	4.19144144	0	0.23858141	0	1	8	FALSE	CALM1	28	1	0	0	0.68085586		FALSE	0	CALM1	0	0
22117	4.19144144	0	0.23858141	0	1	8	FALSE	BCL2L11	28	1	0	0	0.68085586		FALSE	0	BCL2L11	0	0
22121	4.19144144	0	0.23858141	0	1	8	FALSE	SUPT6H	28	1	0	0	0.68085586		FALSE	0	SUPT6H	0	0
22124	4.19144144	0	0.23858141	0	1	8	FALSE	CREB3L3	28	1	0	0	0.68085586		FALSE	0	CREB3L3	0	0
22126	4.19144144	0	0.23858141	0	1	8	FALSE	FBXO25	28	1	0	0	0.68085586		FALSE	0	FBXO25	0	0
22128	4.19144144	0	0.23858141	0	1	8	FALSE	TBK1	28	1	0	0	0.68085586		FALSE	0	TBK1	0	0
22130	5.73423423	0	0.1743912	0	1	10	FALSE	TACC3	10	1	0	0	0.52657658		FALSE	0	TACC3	0	0
22132	5.73423423	0	0.1743912	0	1	10	FALSE	RARRES3	10	1	0	0	0.52657658		FALSE	0	RARRES3	0	0
22135	5.73423423	0	0.1743912	0	1	10	FALSE	CTNNAL1	10	1	0	0	0.52657658		FALSE	0	CTNNAL1	0	0
22137	5.73423423	0	0.1743912	0	1	10	FALSE	DDX58	10	1	0	0	0.52657658		FALSE	0	DDX58	0	0
22139	4.67567568	0	0.21387283	0	1	8	FALSE	RASSF6	74	1	0	0	0.63243243		FALSE	0	RASSF6	0	0
22141	4.67567568	0	0.21387283	0	1	8	FALSE	FGFR1OP	74	1	0	0	0.63243243		FALSE	0	FGFR1OP	0	0
22143	4.67567568	0	0.21387283	0	1	8	FALSE	MRPL4	74	1	0	0	0.63243243		FALSE	0	MRPL4	0	0
22145	4.67567568	0	0.21387283	0	1	8	FALSE	RASSF1	74	1	0	0	0.63243243		FALSE	0	RASSF1	0	0
22147	4.67567568	0	0.21387283	0	1	8	FALSE	ADCYAP1	74	1	0	0	0.63243243		FALSE	0	ADCYAP1	0	0
22149	4.67567568	0	0.21387283	0	1	8	FALSE	MOB1B	74	1	0	0	0.63243243		FALSE	0	MOB1B	0	0
22152	4.67567568	0	0.21387283	0	1	8	FALSE	MOB1A	74	1	0	0	0.63243243		FALSE	0	MOB1A	0	0
22154	4.67567568	0	0.21387283	0	1	8	FALSE	CLEC11A	74	1	0	0	0.63243243		FALSE	0	CLEC11A	0	0
22157	4.67567568	0	0.21387283	0	1	8	FALSE	SOCS6	74	1	0	0	0.63243243		FALSE	0	SOCS6	0	0
22159	4.67567568	0	0.21387283	0	1	8	FALSE	AZI1	74	1	0	0	0.63243243		FALSE	0	AZI1	0	0
22161	4.67567568	0	0.21387283	0	1	8	FALSE	CUL3	74	1	0	0	0.63243243		FALSE	0	CUL3	0	0
22165	4.3536036	0	0.22969477	0	1	8	FALSE	PDPK1	12	1	0	0	0.66463964		FALSE	0	PDPK1	0	0
22168	4.48423423	0	0.22300352	0	1	8	FALSE	CLEC12A	13	1	0	0	0.65157658	mRNAup	FALSE	0	CLEC12A	0	0
22170	4.48423423	0	0.22300352	0	1	8	FALSE	RAD21	13	1	0	0	0.65157658		FALSE	0	RAD21	0	0
22172	4.48423423	0	0.22300352	0	1	8	FALSE	TMEM17	13	1	0	0	0.65157658		FALSE	0	TMEM17	0	0
22174	4.48423423	0	0.22300352	0	1	8	FALSE	TEX29	13	1	0	0	0.65157658		FALSE	0	TEX29	0	0
22176	4.48423423	0	0.22300352	0	1	8	FALSE	LPAR6	13	1	0	0	0.65157658		FALSE	0	LPAR6	0	0
22178	4.48423423	0	0.22300352	0	1	8	FALSE	STX3	13	1	0	0	0.65157658		FALSE	0	STX3	0	0
22180	4.48423423	0	0.22300352	0	1	8	FALSE	STX12	13	1	0	0	0.65157658		FALSE	0	STX12	0	0
22183	4.48423423	0	0.22300352	0	1	8	FALSE	TMEM216	13	1	0	0	0.65157658		FALSE	0	TMEM216	0	0
22185	4.48423423	0	0.22300352	0	1	8	FALSE	STX6	13	1	0	0	0.65157658		FALSE	0	STX6	0	0
22187	4.48423423	0	0.22300352	0	1	8	FALSE	STX7	13	1	0	0	0.65157658		FALSE	0	STX7	0	0
22189	4.48423423	0	0.22300352	0	1	8	FALSE	VTI1B	13	1	0	0	0.65157658		FALSE	0	VTI1B	0	0
22191	3.88288288	0	0.2575406	0	1	6	FALSE	TRIM33	77	1	0	0	0.71171171		FALSE	0	TRIM33	0	0
22194	3.88288288	0	0.2575406	0	1	6	FALSE	RUNX1T1	77	1	0	0	0.71171171		FALSE	0	RUNX1T1	0	0
22196	3.88288288	0	0.2575406	0	1	6	FALSE	PTF1A	77	1	0	0	0.71171171		FALSE	0	PTF1A	0	0
22198	3.88288288	0	0.2575406	0	1	6	FALSE	NOTCH1	77	1	0	0	0.71171171		FALSE	0	NOTCH1	0	0
22200	3.88288288	0	0.2575406	0	1	6	FALSE	STAT5A	77	1	0	0	0.71171171		FALSE	0	STAT5A	0	0
22202	3.88288288	0	0.2575406	0	1	6	FALSE	RNASEL	77	1	0	0	0.71171171		FALSE	0	RNASEL	0	0
22204	3.88288288	0	0.2575406	0	1	6	FALSE	ID3	77	1	0	0	0.71171171		FALSE	0	ID3	0	0
22207	3.88288288	0	0.2575406	0	1	6	FALSE	RUNX1	77	1	0	0	0.71171171		FALSE	0	RUNX1	0	0
22209	3.88288288	0	0.2575406	0	1	6	FALSE	SOX2	77	1	0	0	0.71171171		FALSE	0	SOX2	0	0
22211	3.88288288	0	0.2575406	0	1	6	FALSE	SOX10	77	1	0	0	0.71171171		FALSE	0	SOX10	0	0
22213	3.88288288	0	0.2575406	0	1	6	FALSE	MYOG	77	1	0	0	0.71171171		FALSE	0	MYOG	0	0
22215	3.88288288	0	0.2575406	0	1	6	FALSE	DGCR6	77	1	0	0	0.71171171		FALSE	0	DGCR6	0	0
22218	3.88288288	0	0.2575406	0	1	6	FALSE	BMF	77	1	0	0	0.71171171		FALSE	0	BMF	0	0
22220	3.88288288	0	0.2575406	0	1	6	FALSE	SRI	77	1	0	0	0.71171171		FALSE	0	SRI	0	0
22222	3.88288288	0	0.2575406	0	1	6	FALSE	CDKN2C	77	1	0	0	0.71171171		FALSE	0	CDKN2C	0	0
22224	3.88288288	0	0.2575406	0	1	6	FALSE	NEUROD1	77	1	0	0	0.71171171		FALSE	0	NEUROD1	0	0
22227	3.88288288	0	0.2575406	0	1	6	FALSE	CCDC101	77	1	0	0	0.71171171		FALSE	0	CCDC101	0	0
22229	3.88288288	0	0.2575406	0	1	6	FALSE	SHMT2	77	1	0	0	0.71171171		FALSE	0	SHMT2	0	0
22231	3.88288288	0	0.2575406	0	1	6	FALSE	SOX8	77	1	0	0	0.71171171		FALSE	0	SOX8	0	0
22233	3.88288288	0	0.2575406	0	1	6	FALSE	OLIG3	77	1	0	0	0.71171171		FALSE	0	OLIG3	0	0
22235	3.88288288	0	0.2575406	0	1	6	FALSE	MSC	77	1	0	0	0.71171171		FALSE	0	MSC	0	0
22238	3.88288288	0	0.2575406	0	1	6	FALSE	TAL2	77	1	0	0	0.71171171		FALSE	0	TAL2	0	0
22241	3.88288288	0	0.2575406	0	1	6	FALSE	MESP2	77	1	0	0	0.71171171		FALSE	0	MESP2	0	0
22244	3.88288288	0	0.2575406	0	1	6	FALSE	ASCL4	77	1	0	0	0.71171171		FALSE	0	ASCL4	0	0
22246	3.88288288	0	0.2575406	0	1	6	FALSE	HAND1	77	1	0	0	0.71171171		FALSE	0	HAND1	0	0
22248	3.88288288	0	0.2575406	0	1	6	FALSE	TAL1	77	1	0	0	0.71171171		FALSE	0	TAL1	0	0
22250	3.88288288	0	0.2575406	0	1	6	FALSE	MLLT6	77	1	0	0	0.71171171		FALSE	0	MLLT6	0	0
22252	3.88288288	0	0.2575406	0	1	6	FALSE	TCF21	77	1	0	0	0.71171171		FALSE	0	TCF21	0	0
22255	4.42567568	0	0.2259542	0	1	6	FALSE	VAPB	8	1	0	0	0.65743243		FALSE	0	VAPB	0	0
22257	4.74774775	0	0.21062619	0	1	8	FALSE	UBE2I	35	1	0	0	0.62522523		FALSE	0	UBE2I	0	0
22259	4.74774775	0	0.21062619	0	1	8	FALSE	CIAO1	35	1	0	0	0.62522523		FALSE	0	CIAO1	0	0
22261	4.74774775	0	0.21062619	0	1	8	FALSE	PAWR	35	1	0	0	0.62522523		FALSE	0	PAWR	0	0
22264	4.74774775	0	0.21062619	0	1	8	FALSE	MEN1	35	1	0	0	0.62522523		FALSE	0	MEN1	0	0
22266	4.74774775	0	0.21062619	0	1	8	FALSE	WTAP	35	1	0	0	0.62522523		FALSE	0	WTAP	0	0
22268	4.74774775	0	0.21062619	0	1	8	FALSE	PRKACA	35	1	0	0	0.62522523		FALSE	0	PRKACA	0	0
