# Supplementary material for: The Genetic and Epigenetic Mechanisms Involved in Irreversible Pulp Neural Inflammation
Source: Dis Markers. 2021 Mar 8;2021:8831948. doi: 10.1155/2021/8831948 (PMC7968449; doi:10.1155/2021/8831948)
Supplement: Supplementary 5 — File S5: the topological characteristics of all DEG nodes in the PPI network for the significant green module of GSE92681 dataset. [file 8831948.f5.txt]

SUID	AverageShortestPathLength	BetweennessCentrality	ClosenessCentrality	ClusteringCoefficient	Degree	Eccentricity	IsSingleNode	name	NeighborhoodConnectivity	NumberOfDirectedEdges	NumberOfUndirectedEdges	PartnerOfMultiEdgedNodePairs	Radiality	regulate	selected	SelfLoops	shared name	Stress	TopologicalCoefficient
72	3.64804469	9.29E-06	0.27411945	0	3	7	FALSE	ACBD4	7.33333333	3	0	0	0.66899441		FALSE	0	ACBD4	1924	0.35185185
73	3.25195531	0.0041021	0.3075073	0	17	6	FALSE	APP	25.82352941	17	0	0	0.71850559		FALSE	0	APP	774748	0.06237068
75	3.08463687	0.00195235	0.32418727	0	9	5	FALSE	ACSF3	10.55555556	9	0	0	0.73942039		FALSE	0	ACSF3	174322	0.12740741
76	2.1	0.16532965	0.47619048	0.00540541	75	4	FALSE	UBC	56.97333333	75	0	0	0.8625		FALSE	0	UBC	14455802	0.01717252
78	2.48910615	0.00220728	0.40175065	0.04761905	8	5	FALSE	ACSL1	293.7142857	8	0	1	0.81386173	mRNAup	FALSE	0	ACSL1	70968	0.14405113
80	3.48882682	0	0.2866293	0	1	6	FALSE	NR3C2	7	1	0	0	0.68889665		FALSE	0	NR3C2	0	0
82	3.35726257	2.10E-04	0.29786172	0	4	6	FALSE	UBD	53.5	4	0	0	0.70534218	mRNAup	FALSE	0	UBD	34154	0.2625
84	2.93715084	0.04028006	0.340466	8.08E-04	101	5	FALSE	ACTN2	4.23	101	0	1	0.75785615		FALSE	0	ACTN2	6557940	0.01251908
85	3.93687151	0	0.2540088	0	1	6	FALSE	P02593	100	1	0	0	0.63289106		FALSE	0	P02593	0	0
87	3.93687151	0	0.2540088	0	1	6	FALSE	SAXO1	100	1	0	0	0.63289106		FALSE	0	SAXO1	0	0
90	3.93687151	0	0.2540088	0	1	6	FALSE	SNAI1	100	1	0	0	0.63289106		FALSE	0	SNAI1	0	0
92	3.93687151	0	0.2540088	0	1	6	FALSE	EPS8L1	100	1	0	0	0.63289106		FALSE	0	EPS8L1	0	0
94	3.93687151	0	0.2540088	0	1	6	FALSE	TNN	100	1	0	0	0.63289106		FALSE	0	TNN	0	0
96	3.93687151	0	0.2540088	0	1	6	FALSE	COIL	100	1	0	0	0.63289106		FALSE	0	COIL	0	0
98	3.93687151	0	0.2540088	0	1	6	FALSE	TNNI1	100	1	0	0	0.63289106		FALSE	0	TNNI1	0	0
100	3.32011173	5.48E-04	0.30119468	0	4	6	FALSE	ACTB	61.25	4	0	0	0.70998603		FALSE	0	ACTB	47414	0.25969828
102	3.93687151	0	0.2540088	0	1	6	FALSE	ZNF446	100	1	0	0	0.63289106		FALSE	0	ZNF446	0	0
104	3.93687151	0	0.2540088	0	1	6	FALSE	MOS	100	1	0	0	0.63289106		FALSE	0	MOS	0	0
106	3.93687151	0	0.2540088	0	1	6	FALSE	TULP3	100	1	0	0	0.63289106		FALSE	0	TULP3	0	0
108	3.93687151	0	0.2540088	0	1	6	FALSE	RTP5	100	1	0	0	0.63289106		FALSE	0	RTP5	0	0
110	2.74497207	0.00109806	0.36430243	0	2	6	FALSE	ATXN2	1034.5	2	0	0	0.78187849		FALSE	0	ATXN2	299696	0.50439239
112	3.93687151	0	0.2540088	0	1	6	FALSE	TPM2	100	1	0	0	0.63289106		FALSE	0	TPM2	0	0
114	3.93687151	0	0.2540088	0	1	6	FALSE	RPL35	100	1	0	0	0.63289106		FALSE	0	RPL35	0	0
116	3.93687151	0	0.2540088	0	1	6	FALSE	FAM154A	100	1	0	0	0.63289106		FALSE	0	FAM154A	0	0
118	3.93687151	0	0.2540088	0	1	6	FALSE	TPM1	100	1	0	0	0.63289106		FALSE	0	TPM1	0	0
120	3.93687151	0	0.2540088	0	1	6	FALSE	SNAPIN	100	1	0	0	0.63289106		FALSE	0	SNAPIN	0	0
122	3.93687151	0	0.2540088	0	1	6	FALSE	MICALL2	100	1	0	0	0.63289106		FALSE	0	MICALL2	0	0
124	3.9103352	8.67E-05	0.25573255	0	2	6	FALSE	SP100	71.5	2	0	0	0.6362081		FALSE	0	SP100	8478	0.51086957
126	2.71675978	0.00245228	0.36808554	0	4	6	FALSE	CAPN1	535.5	4	0	0	0.78540503		FALSE	0	CAPN1	631768	0.25500954
128	3.93687151	0	0.2540088	0	1	6	FALSE	CACNA1D	100	1	0	0	0.63289106		FALSE	0	CACNA1D	0	0
130	3.93687151	0	0.2540088	0	1	6	FALSE	BRMS1L	100	1	0	0	0.63289106		FALSE	0	BRMS1L	0	0
132	3.93687151	0	0.2540088	0	1	6	FALSE	PDLIM3	100	1	0	0	0.63289106		FALSE	0	PDLIM3	0	0
134	3.93687151	0	0.2540088	0	1	6	FALSE	DYSF	100	1	0	0	0.63289106	mRNAup	FALSE	0	DYSF	0	0
136	2.73156425	0.00257467	0.3660906	0	3	6	FALSE	ACTN4	699	3	0	0	0.78355447		FALSE	0	ACTN4	430534	0.33671008
138	3.69134078	0	0.27090428	0	1	7	FALSE	AGAP9	5	1	0	0	0.6635824	mRNAdown	FALSE	0	AGAP9	0	0
139	2.69162011	0.00267851	0.37152345	0.1	5	6	FALSE	HSPB1	463.8	5	0	0	0.78854749		FALSE	0	HSPB1	988140	0.21054545
141	3.04944134	0.01395241	0.32792892	0	48	5	FALSE	BACH1	3.875	48	0	0	0.74381983		FALSE	0	BACH1	2209618	0.03685897
142	4.04916201	0	0.24696468	0	1	6	FALSE	PATZ1	48	1	0	0	0.61885475		FALSE	0	PATZ1	0	0
144	3.39134078	3.02E-05	0.29486863	0	2	6	FALSE	TOPBP1	72	2	0	0	0.7010824		FALSE	0	TOPBP1	10428	0.53383459
146	3.33240223	3.47E-04	0.30008382	0	3	6	FALSE	NCOR1	69.66666667	3	0	0	0.70844972		FALSE	0	NCOR1	27402	0.34162521
148	3.95	1.86E-04	0.25316456	0	3	6	FALSE	RBCK1	51	3	0	0	0.63125		FALSE	0	RBCK1	28938	0.34482759
150	3.98156425	5.43E-05	0.25115757	0	2	6	FALSE	NFE2L2	67.5	2	0	0	0.62730447		FALSE	0	NFE2L2	12350	0.51550388
152	4.04916201	0	0.24696468	0	1	6	FALSE	MAFG	48	1	0	0	0.61885475		FALSE	0	MAFG	0	0
154	2.77569832	6.90E-04	0.3602697	0.33333333	3	6	FALSE	MRE11A	704.3333333	3	0	0	0.77803771		FALSE	0	MRE11A	145530	0.34191355
156	4.04916201	0	0.24696468	0	1	6	FALSE	H3BMW4	48	1	0	0	0.61885475		FALSE	0	H3BMW4	0	0
158	3.39134078	3.02E-05	0.29486863	0	2	6	FALSE	NBN	72	2	0	0	0.7010824		FALSE	0	NBN	10428	0.53383459
160	4.04916201	0	0.24696468	0	1	6	FALSE	BRCA2	48	1	0	0	0.61885475		FALSE	0	BRCA2	0	0
162	4.04916201	0	0.24696468	0	1	6	FALSE	HMMR	48	1	0	0	0.61885475		FALSE	0	HMMR	0	0
164	4.04916201	0	0.24696468	0	1	6	FALSE	MAFF	48	1	0	0	0.61885475		FALSE	0	MAFF	0	0
166	4.04916201	0	0.24696468	0	1	6	FALSE	ATF7	48	1	0	0	0.61885475		FALSE	0	ATF7	0	0
168	2.79636872	6.59E-04	0.35760663	0	2	6	FALSE	XPO1	1008.5	2	0	0	0.77545391		FALSE	0	XPO1	135102	0.50249377
170	4.04916201	0	0.24696468	0	1	6	FALSE	MAFK	48	1	0	0	0.61885475		FALSE	0	MAFK	0	0
172	4.04916201	0	0.24696468	0	1	6	FALSE	H0Y2U5	48	1	0	0	0.61885475		FALSE	0	H0Y2U5	0	0
174	3.41284916	0.00117465	0.29301031	0	3	6	FALSE	HDAC1	37	3	0	0	0.69839385		FALSE	0	HDAC1	45690	0.33962264
176	3.22765363	9.61E-04	0.30982259	0.06666667	6	6	FALSE	TP53	83.33333333	6	0	0	0.7215433		FALSE	0	TP53	410890	0.19269619
178	3.38687151	6.40E-05	0.29525773	0	3	6	FALSE	BARD1	50	3	0	0	0.70164106		FALSE	0	BARD1	20206	0.35766423
180	2.77569832	6.90E-04	0.3602697	0.33333333	3	6	FALSE	MLH1	704.3333333	3	0	0	0.77803771		FALSE	0	MLH1	145530	0.34191355
182	3.02709497	0.0188649	0.33034973	0	65	5	FALSE	BID	3.52307692	65	0	0	0.74661313		FALSE	0	BID	5417970	0.03076923
183	4.02681564	0	0.24833518	0	1	6	FALSE	TLE1	65	1	0	0	0.62164804		FALSE	0	TLE1	0	0
185	2.79134078	4.52E-04	0.35825078	0	2	6	FALSE	GAPDH	1017	2	0	0	0.7760824		FALSE	0	GAPDH	193552	0.50547264
187	4.02681564	0	0.24833518	0	1	6	FALSE	BCL2L11	65	1	0	0	0.62164804		FALSE	0	BCL2L11	0	0
189	4.02681564	0	0.24833518	0	1	6	FALSE	BAK1	65	1	0	0	0.62164804		FALSE	0	BAK1	0	0
191	4.02681564	0	0.24833518	0	1	6	FALSE	FBN3	65	1	0	0	0.62164804		FALSE	0	FBN3	0	0
193	2.74162011	0.00198016	0.36474783	0.06666667	6	6	FALSE	YWHAB	367.3333333	6	0	0	0.78229749		FALSE	0	YWHAB	623006	0.17394054
195	4.02681564	0	0.24833518	0	1	6	FALSE	BCL2	65	1	0	0	0.62164804		FALSE	0	BCL2	0	0
197	4.02681564	0	0.24833518	0	1	6	FALSE	MCL1	65	1	0	0	0.62164804		FALSE	0	MCL1	0	0
199	4.02681564	0	0.24833518	0	1	6	FALSE	C14orf1	65	1	0	0	0.62164804		FALSE	0	C14orf1	0	0
201	4.02681564	0	0.24833518	0	1	6	FALSE	TNFRSF10B	65	1	0	0	0.62164804		FALSE	0	TNFRSF10B	0	0
204	4.01955307	1.30E-05	0.24878388	0	2	6	FALSE	SETDB1	36	2	0	0	0.62255587		FALSE	0	SETDB1	1664	0.50724638
206	4.02681564	0	0.24833518	0	1	6	FALSE	GBP2	65	1	0	0	0.62164804		FALSE	0	GBP2	0	0
208	4.02681564	0	0.24833518	0	1	6	FALSE	BCL2A1	65	1	0	0	0.62164804	mRNAup	FALSE	0	BCL2A1	0	0
210	3.95670391	4.31E-05	0.25273562	0	2	6	FALSE	IKBKG	72	2	0	0	0.63041201		FALSE	0	IKBKG	14158	0.52985075
212	2.71312849	9.49E-04	0.36857819	0	3	6	FALSE	TUBB2B	738.3333333	3	0	0	0.78585894		FALSE	0	TUBB2B	606884	0.34763476
214	2.79134078	4.52E-04	0.35825078	0	2	6	FALSE	CRNKL1	1017	2	0	0	0.7760824		FALSE	0	CRNKL1	193552	0.50547264
216	2.66564246	0.00254139	0.37514408	0	5	6	FALSE	RPA1	473	5	0	0	0.79179469		FALSE	0	RPA1	1148242	0.21396192
218	2.79134078	4.52E-04	0.35825078	0	2	6	FALSE	UBQLN2	1017	2	0	0	0.7760824		FALSE	0	UBQLN2	193552	0.50547264
220	3.96871508	7.67E-05	0.25197072	0	2	6	FALSE	FASLG	61.5	2	0	0	0.62891061		FALSE	0	FASLG	10490	0.50840336
222	2.79134078	4.52E-04	0.35825078	0	2	6	FALSE	CRMP1	1017	2	0	0	0.7760824		FALSE	0	CRMP1	193552	0.50547264
224	4.0122905	2.85E-05	0.2492342	0	2	6	FALSE	AHCYL1	44.5	2	0	0	0.62346369		FALSE	0	AHCYL1	3682	0.51176471
226	3.97905028	7.64E-05	0.25131625	0	2	6	FALSE	MAPK8	66.5	2	0	0	0.62761872		FALSE	0	MAPK8	12388	0.50775194
228	4.01173184	4.99E-05	0.2492689	0	2	6	FALSE	REL	44.5	2	0	0	0.62353352		FALSE	0	REL	4314	0.50581395
230	4.02681564	0	0.24833518	0	1	6	FALSE	PLEKHM1	65	1	0	0	0.62164804		FALSE	0	PLEKHM1	0	0
232	3.81731844	2.83E-04	0.261964	0	3	6	FALSE	RPA2	105.6666667	3	0	0	0.6478352		FALSE	0	RPA2	65530	0.34543454
234	4.02681564	0	0.24833518	0	1	6	FALSE	RBM48	65	1	0	0	0.62164804		FALSE	0	RBM48	0	0
236	4.02681564	0	0.24833518	0	1	6	FALSE	FADD	65	1	0	0	0.62164804		FALSE	0	FADD	0	0
238	3.95670391	4.31E-05	0.25273562	0	2	6	FALSE	TNFRSF1A	72	2	0	0	0.63041201		FALSE	0	TNFRSF1A	14158	0.52985075
240	4.02681564	0	0.24833518	0	1	6	FALSE	ZHX1	65	1	0	0	0.62164804		FALSE	0	ZHX1	0	0
242	3.00670391	0.03019117	0.33259012	0	79	5	FALSE	BIRC3	2.86075949	79	0	0	0.74916201	mRNAup	FALSE	0	BIRC3	6405330	0.02241879
243	4.00642458	0	0.24959911	0	1	6	FALSE	TRIM32	79	1	0	0	0.62419693		FALSE	0	TRIM32	0	0
245	4.00642458	0	0.24959911	0	1	6	FALSE	MXD1	79	1	0	0	0.62419693	mRNAup	FALSE	0	MXD1	0	0
247	2.76815642	0.00115285	0.36125126	0.33333333	3	6	FALSE	HAX1	701.3333333	3	0	0	0.77898045		FALSE	0	HAX1	338446	0.33963178
249	2.77849162	0.00103264	0.35990751	0	2	6	FALSE	CYFIP2	1024	2	0	0	0.77768855		FALSE	0	CYFIP2	325458	0.50369276
251	3.88463687	5.48E-04	0.25742432	0	4	6	FALSE	IKBKB	64.75	4	0	0	0.63942039		FALSE	0	IKBKB	143066	0.2667364
253	4.00642458	0	0.24959911	0	1	6	FALSE	IRF1	79	1	0	0	0.62419693		FALSE	0	IRF1	0	0
256	4.00642458	0	0.24959911	0	1	6	FALSE	DZIP3	79	1	0	0	0.62419693		FALSE	0	DZIP3	0	0
258	4.00642458	0	0.24959911	0	1	6	FALSE	WDR61	79	1	0	0	0.62419693		FALSE	0	WDR61	0	0
260	4.00642458	0	0.24959911	0	1	6	FALSE	RCHY1	79	1	0	0	0.62419693		FALSE	0	RCHY1	0	0
262	3.93407821	9.53E-05	0.25418915	0	3	6	FALSE	UBE2D3	50	3	0	0	0.63324022		FALSE	0	UBE2D3	14406	0.35
264	4.0047486	5.58E-04	0.24970356	0	2	6	FALSE	TRAF1	42	2	0	0	0.62440642		FALSE	0	TRAF1	272136	0.5125
266	3.90865922	2.91E-04	0.25584221	0	2	6	FALSE	RIPK3	94	2	0	0	0.6364176	mRNAup	FALSE	0	RIPK3	34274	0.50543478
268	3.33687151	8.13E-04	0.2996819	0	5	6	FALSE	UBE2D1	47	5	0	0	0.70789106		FALSE	0	UBE2D1	54348	0.2081448
270	4.00642458	0	0.24959911	0	1	6	FALSE	RIPK4	79	1	0	0	0.62419693		FALSE	0	RIPK4	0	0
272	4.00642458	0	0.24959911	0	1	6	FALSE	4-Sep	79	1	0	0	0.62419693		FALSE	0	4-Sep	0	0
274	4.00642458	0	0.24959911	0	1	6	FALSE	TANK	79	1	0	0	0.62419693		FALSE	0	TANK	0	0
276	4.00642458	0	0.24959911	0	1	6	FALSE	PACS2	79	1	0	0	0.62419693		FALSE	0	PACS2	0	0
278	4.00642458	0	0.24959911	0	1	6	FALSE	SNX7	79	1	0	0	0.62419693		FALSE	0	SNX7	0	0
280	4.00642458	0	0.24959911	0	1	6	FALSE	XAF1	79	1	0	0	0.62419693		FALSE	0	XAF1	0	0
282	4.00642458	0	0.24959911	0	1	6	FALSE	BCL10	79	1	0	0	0.62419693		FALSE	0	BCL10	0	0
284	2.77094972	0.00140997	0.3608871	0	3	6	FALSE	UBA1	691.3333333	3	0	0	0.77863128		FALSE	0	UBA1	406622	0.33757131
286	4.00642458	0	0.24959911	0	1	6	FALSE	IKBKE	79	1	0	0	0.62419693		FALSE	0	IKBKE	0	0
288	4.00642458	0	0.24959911	0	1	6	FALSE	TNF	79	1	0	0	0.62419693	mRNAup	FALSE	0	TNF	0	0
290	2.77849162	0.00103264	0.35990751	0	2	6	FALSE	USP15	1024	2	0	0	0.77768855		FALSE	0	USP15	325458	0.50369276
292	3.22067039	0.00300225	0.31049436	0	9	6	FALSE	SUMO1	48.66666667	9	0	0	0.7224162		FALSE	0	SUMO1	491632	0.11769547
294	3.96675978	9.09E-05	0.25209492	0	2	6	FALSE	UBE2I	61	2	0	0	0.62915503		FALSE	0	UBE2I	11900	0.50847458
296	2.77849162	0.00103264	0.35990751	0	2	6	FALSE	USP9X	1024	2	0	0	0.77768855		FALSE	0	USP9X	325458	0.50369276
298	2.77849162	0.00103264	0.35990751	0	2	6	FALSE	WDR82	1024	2	0	0	0.77768855		FALSE	0	WDR82	325458	0.50369276
300	2.75	0.00177529	0.36363636	0	3	6	FALSE	OTUB1	709	3	0	0	0.78125		FALSE	0	OTUB1	586170	0.33989438
302	4.00642458	0	0.24959911	0	1	6	FALSE	UBE2L3	79	1	0	0	0.62419693		FALSE	0	UBE2L3	0	0
305	3.97681564	3.59E-05	0.25145747	0	2	6	FALSE	UBE2E1	52.5	2	0	0	0.62789804		FALSE	0	UBE2E1	10826	0.515
307	4.00642458	0	0.24959911	0	1	6	FALSE	UBE2V1	79	1	0	0	0.62419693		FALSE	0	UBE2V1	0	0
309	4.00642458	0	0.24959911	0	1	6	FALSE	UBE2Q2	79	1	0	0	0.62419693		FALSE	0	UBE2Q2	0	0
311	4.00642458	0	0.24959911	0	1	6	FALSE	UBR4	79	1	0	0	0.62419693		FALSE	0	UBR4	0	0
313	2.77849162	0.00103264	0.35990751	0	2	6	FALSE	GSPT1	1024	2	0	0	0.77768855		FALSE	0	GSPT1	325458	0.50369276
315	3.99860335	5.58E-05	0.25008732	0	2	6	FALSE	UBE2D2	47	2	0	0	0.62517458		FALSE	0	UBE2D2	3828	0.50549451
317	3.81955307	6.42E-04	0.26181074	0	3	6	FALSE	NFKB1	100.3333333	3	0	0	0.64755587		FALSE	0	NFKB1	191108	0.33902162
319	2.76703911	0.00159762	0.36139713	0	3	6	FALSE	WDR1	693.6666667	3	0	0	0.77912011		FALSE	0	WDR1	439638	0.33772144
321	2.57318436	0.00790156	0.38862353	0.09090909	11	6	FALSE	EGFR	239	11	0	0	0.80335196		FALSE	0	EGFR	2098466	0.09984785
323	3.97905028	1.49E-04	0.25131625	0	2	6	FALSE	TAB1	62.5	2	0	0	0.62761872		FALSE	0	TAB1	9716	0.50409836
325	3.93547486	6.21E-04	0.25409894	0	3	6	FALSE	CASP8	58	3	0	0	0.63306564		FALSE	0	CASP8	141378	0.34969325
327	4.00642458	0	0.24959911	0	1	6	FALSE	XIAP	79	1	0	0	0.62419693		FALSE	0	XIAP	0	0
330	2.77849162	0.00103264	0.35990751	0	2	6	FALSE	RNF31	1024	2	0	0	0.77768855		FALSE	0	RNF31	325458	0.50369276
332	4.00642458	0	0.24959911	0	1	6	FALSE	DCAF7	79	1	0	0	0.62419693		FALSE	0	DCAF7	0	0
334	3.94022346	1.34E-04	0.25379271	0	4	6	FALSE	CASP3	38.75	4	0	0	0.63247207		FALSE	0	CASP3	20340	0.2677305
336	3.95502793	1.51E-04	0.25284271	0	2	6	FALSE	RAF1	83	2	0	0	0.63062151		FALSE	0	RAF1	16920	0.50617284
338	4.00642458	0	0.24959911	0	1	6	FALSE	BIRC5	79	1	0	0	0.62419693		FALSE	0	BIRC5	0	0
340	2.77849162	0.00103264	0.35990751	0	2	6	FALSE	USP7	1024	2	0	0	0.77768855		FALSE	0	USP7	325458	0.50369276
342	3.95670391	4.31E-05	0.25273562	0	2	6	FALSE	CASP10	72	2	0	0	0.63041201	mRNAup	FALSE	0	CASP10	14158	0.52985075
344	4.00642458	0	0.24959911	0	1	6	FALSE	RIPK2	79	1	0	0	0.62419693		FALSE	0	RIPK2	0	0
346	3.95670391	4.31E-05	0.25273562	0	2	6	FALSE	CASP1	72	2	0	0	0.63041201		FALSE	0	CASP1	14158	0.52985075
348	3.05837989	0.01049313	0.3269705	0	33	5	FALSE	C11orf54	4.24242424	33	0	0	0.74270251		FALSE	0	C11orf54	1574956	0.0405303
349	4.05810056	0	0.2464207	0	1	6	FALSE	SERPINB5	33	1	0	0	0.61773743		FALSE	0	SERPINB5	0	0
351	2.80391061	4.65E-04	0.35664475	0	2	6	FALSE	VAC14	1001	2	0	0	0.77451117		FALSE	0	VAC14	103218	0.50301811
353	4.05810056	0	0.2464207	0	1	6	FALSE	SDF2	33	1	0	0	0.61773743		FALSE	0	SDF2	0	0
355	2.80391061	4.65E-04	0.35664475	0	2	6	FALSE	PRDX6	1001	2	0	0	0.77451117		FALSE	0	PRDX6	103218	0.50301811
357	4.05810056	0	0.2464207	0	1	6	FALSE	SERPINB3	33	1	0	0	0.61773743		FALSE	0	SERPINB3	0	0
361	2.80391061	4.65E-04	0.35664475	0	2	6	FALSE	TPI1	1001	2	0	0	0.77451117		FALSE	0	TPI1	103218	0.50301811
363	4.05810056	0	0.2464207	0	1	6	FALSE	YKT6	33	1	0	0	0.61773743		FALSE	0	YKT6	0	0
365	3.89162011	4.64E-04	0.25696239	0	4	6	FALSE	SSX2IP	44.5	4	0	0	0.63854749		FALSE	0	SSX2IP	89726	0.25588235
368	4.05810056	0	0.2464207	0	1	6	FALSE	NSFL1C	33	1	0	0	0.61773743		FALSE	0	NSFL1C	0	0
370	2.80391061	4.65E-04	0.35664475	0	2	6	FALSE	PCMT1	1001	2	0	0	0.77451117		FALSE	0	PCMT1	103218	0.50301811
372	2.80391061	4.65E-04	0.35664475	0	2	6	FALSE	CCT2	1001	2	0	0	0.77451117		FALSE	0	CCT2	103218	0.50301811
374	4.05810056	0	0.2464207	0	1	6	FALSE	FKBP2	33	1	0	0	0.61773743		FALSE	0	FKBP2	0	0
376	4.05810056	0	0.2464207	0	1	6	FALSE	BCAT2	33	1	0	0	0.61773743		FALSE	0	BCAT2	0	0
378	2.80391061	4.65E-04	0.35664475	0	2	6	FALSE	TKT	1001	2	0	0	0.77451117		FALSE	0	TKT	103218	0.50301811
380	4.33743017	0	0.23055126	0	1	7	FALSE	C14orf178	14	1	0	0	0.58282123	mRNAdown	FALSE	0	C14orf178	0	0
381	3.3377095	0.00330765	0.29960666	0	14	6	FALSE	NRF1	17.64285714	14	0	0	0.70778631		FALSE	0	NRF1	401072	0.07777036
383	3.09469274	0.00171558	0.32313386	0	6	5	FALSE	C2CD2	15.33333333	6	0	0	0.73816341		FALSE	0	C2CD2	98322	0.19111111
384	4.09441341	0	0.24423523	0	1	6	FALSE	ARHGAP10	6	1	0	0	0.61319832		FALSE	0	ARHGAP10	0	0
386	4.09441341	0	0.24423523	0	1	6	FALSE	SEC14L1	6	1	0	0	0.61319832		FALSE	0	SEC14L1	0	0
389	2.81312849	4.00E-04	0.35547612	0	2	6	FALSE	DYNC1LI2	987.5	2	0	0	0.77335894		FALSE	0	DYNC1LI2	22752	0.50050736
391	4.09441341	0	0.24423523	0	1	6	FALSE	ARHGAP26	6	1	0	0	0.61319832		FALSE	0	ARHGAP26	0	0
393	3.67122905	0.00184671	0.27238834	0	8	7	FALSE	C2orf68	3	8	0	0	0.66609637		FALSE	0	C2orf68	428274	0.13333333
394	4.67094972	0	0.21408922	0	1	8	FALSE	KLHL15	8	1	0	0	0.54113128		FALSE	0	KLHL15	0	0
396	4.05363128	3.78E-05	0.24669239	0	2	6	FALSE	PIR	20.5	2	0	0	0.61829609		FALSE	0	PIR	11436	0.5
398	3.99134078	2.64E-04	0.25054238	0	3	6	FALSE	NAGK	33.66666667	3	0	0	0.6260824		FALSE	0	NAGK	76174	0.33333333
400	2.81145251	9.26E-04	0.35568803	0	2	6	FALSE	GNE	988.5	2	0	0	0.77356844		FALSE	0	GNE	192766	0.50025329
402	4.03519553	4.34E-05	0.24781947	0	2	6	FALSE	GMNN	18	2	0	0	0.62060056		FALSE	0	GMNN	15086	0.5
404	4.67094972	0	0.21408922	0	1	8	FALSE	SMG6	8	1	0	0	0.54113128		FALSE	0	SMG6	0	0
406	4.67094972	0	0.21408922	0	1	8	FALSE	DDHD2	8	1	0	0	0.54113128		FALSE	0	DDHD2	0	0
408	3.07597765	0.00103019	0.32509989	0.13333333	7	5	FALSE	CD226	19	7	0	1	0.74050279	mRNAup	FALSE	0	CD226	80990	0.17961165
409	4.07569832	0	0.24535673	0	1	6	FALSE	PVR	6	1	0	0	0.61553771		FALSE	0	PVR	0	0
412	3.97430168	4.70E-04	0.25161653	0	3	6	FALSE	ITGB2	36.33333333	3	0	0	0.62821229	mRNAup	FALSE	0	ITGB2	90998	0.33650794
414	3.27067039	1.92E-04	0.30574772	0	5	6	FALSE	FYN	52.8	5	0	0	0.7161662		FALSE	0	FYN	26722	0.20887097
416	3.09357542	0.00395559	0.32325056	0	11	5	FALSE	CD97	8.27272727	11	0	0	0.73830307		FALSE	0	CD97	244748	0.0969697
417	2.75614525	0.00179472	0.36282558	0.1	5	6	FALSE	SRC	424.6	5	0	0	0.78048184		FALSE	0	SRC	350790	0.20502901
419	4.09329609	0	0.2443019	0	1	6	FALSE	CD55	11	1	0	0	0.61333799		FALSE	0	CD55	0	0
422	3.07849162	0.00466975	0.32483441	0	18	5	FALSE	CDCA2	7	18	0	0	0.74018855		FALSE	0	CDCA2	511880	0.075
423	2.77486034	0.00140031	0.3603785	0	4	6	FALSE	KPNB1	521	4	0	0	0.77814246		FALSE	0	KPNB1	359486	0.25527737
425	4.07821229	0	0.24520548	0	1	6	FALSE	TCTE1	18	1	0	0	0.61522346		FALSE	0	TCTE1	0	0
427	4.07821229	0	0.24520548	0	1	6	FALSE	NUP153	18	1	0	0	0.61522346		FALSE	0	NUP153	0	0
429	2.79916201	8.83E-04	0.35724978	0	3	6	FALSE	PPP1CB	671.6666667	3	0	0	0.77510475		FALSE	0	PPP1CB	312590	0.33617377
433	3.37905028	1.89E-04	0.29594114	0	4	6	FALSE	SUMO2	39.25	4	0	0	0.70261872		FALSE	0	SUMO2	25946	0.26020408
435	3.05	0.01217735	0.32786885	0	33	5	FALSE	CENPQ	4.24242424	33	0	0	0.74375		FALSE	0	CENPQ	1399152	0.0405303
436	4.04972067	0	0.24693061	0	1	6	FALSE	MLF1IP	33	1	0	0	0.61878492		FALSE	0	MLF1IP	0	0
438	2.80223464	6.90E-04	0.35685805	0	2	6	FALSE	TSR1	1001	2	0	0	0.77472067		FALSE	0	TSR1	108864	0.50226017
440	4.04972067	0	0.24693061	0	1	6	FALSE	RPS16	33	1	0	0	0.61878492		FALSE	0	RPS16	0	0
442	4.04972067	0	0.24693061	0	1	6	FALSE	RPS11	33	1	0	0	0.61878492		FALSE	0	RPS11	0	0
444	4.04972067	0	0.24693061	0	1	6	FALSE	STRA13	33	1	0	0	0.61878492		FALSE	0	STRA13	0	0
446	4.04972067	0	0.24693061	0	1	6	FALSE	Q5TEC6	33	1	0	0	0.61878492		FALSE	0	Q5TEC6	0	0
448	4.04972067	0	0.24693061	0	1	6	FALSE	ZFX	33	1	0	0	0.61878492		FALSE	0	ZFX	0	0
450	2.80223464	6.90E-04	0.35685805	0	2	6	FALSE	RPL18	1001	2	0	0	0.77472067		FALSE	0	RPL18	108864	0.50226017
452	2.80223464	6.90E-04	0.35685805	0	2	6	FALSE	RPL10A	1001	2	0	0	0.77472067		FALSE	0	RPL10A	108864	0.50226017
454	4.04972067	0	0.24693061	0	1	6	FALSE	RPS14	33	1	0	0	0.61878492		FALSE	0	RPS14	0	0
456	2.80223464	6.90E-04	0.35685805	0	2	6	FALSE	SEC24C	1001	2	0	0	0.77472067		FALSE	0	SEC24C	108864	0.50226017
459	4.04972067	0	0.24693061	0	1	6	FALSE	RPL9P9	33	1	0	0	0.61878492		FALSE	0	RPL9P9	0	0
461	2.80223464	6.90E-04	0.35685805	0	2	6	FALSE	CDC42BPA	1001	2	0	0	0.77472067		FALSE	0	CDC42BPA	108864	0.50226017
463	4.04972067	0	0.24693061	0	1	6	FALSE	C19orf57	33	1	0	0	0.61878492		FALSE	0	C19orf57	0	0
465	4.04972067	0	0.24693061	0	1	6	FALSE	CENPC	33	1	0	0	0.61878492		FALSE	0	CENPC	0	0
467	4.04972067	0	0.24693061	0	1	6	FALSE	CENPU	33	1	0	0	0.61878492		FALSE	0	CENPU	0	0
470	2.76396648	0.00297863	0.36179889	0.1	5	6	FALSE	HIST4H4	424.8	5	0	0	0.77950419		FALSE	0	HIST4H4	1175104	0.2045323
472	2.78910615	7.44E-04	0.35853781	0.33333333	3	6	FALSE	KDM1A	687.6666667	3	0	0	0.77636173		FALSE	0	KDM1A	113390	0.33825459
474	2.47486034	0.00917521	0.40406321	0.02795699	32	5	FALSE	CLASP1	68.93548387	32	0	1	0.81564246		FALSE	0	CLASP1	357784	0.03353953
475	3.32206704	5.68E-04	0.30101741	0	6	6	FALSE	PTBP3	46.66666667	6	0	0	0.70974162		FALSE	0	PTBP3	66174	0.18121693
477	3.39581006	2.30E-05	0.29448055	0	2	6	FALSE	E2F3	63.5	2	0	0	0.70052374		FALSE	0	E2F3	2296	0.51652893
480	2.78687151	4.31E-04	0.3588253	0.33333333	3	6	FALSE	MYO1C	689.3333333	3	0	0	0.77664106		FALSE	0	MYO1C	209778	0.34007897
482	2.80921788	0	0.35597097	1	2	6	FALSE	ZW10	1000	2	0	0	0.77384777		FALSE	0	ZW10	0	0.50352467
484	3.47458101	0	0.28780449	0	1	6	FALSE	MAPRE3	31	1	0	0	0.69067737		FALSE	0	MAPRE3	0	0
486	3.47458101	0	0.28780449	0	1	6	FALSE	GCC2	31	1	0	0	0.69067737		FALSE	0	GCC2	0	0
488	3.45363128	8.17E-05	0.28955031	0	2	6	FALSE	HTT	33	2	0	0	0.69329609		FALSE	0	HTT	39196	0.5
490	2.79581006	2.56E-04	0.35767809	0.33333333	3	6	FALSE	YWHAH	682.3333333	3	0	0	0.77552374		FALSE	0	YWHAH	89146	0.3389662
493	3.47458101	0	0.28780449	0	1	6	FALSE	KIF1B	31	1	0	0	0.69067737		FALSE	0	KIF1B	0	0
495	2.77681564	5.96E-04	0.36012474	0.33333333	3	6	FALSE	MAPRE1	695.6666667	3	0	0	0.77789804		FALSE	0	MAPRE1	260236	0.33985011
497	2.69608939	0.00134199	0.37090758	0.1	5	6	FALSE	YWHAG	459.2	5	0	0	0.78798883		FALSE	0	YWHAG	748998	0.21221657
499	3.47458101	0	0.28780449	0	1	6	FALSE	PHKG2	31	1	0	0	0.69067737		FALSE	0	PHKG2	0	0
501	3.47458101	0	0.28780449	0	1	6	FALSE	SPAG5	31	1	0	0	0.69067737		FALSE	0	SPAG5	0	0
503	2.80921788	0	0.35597097	1	2	6	FALSE	MARK2	1000	2	0	0	0.77384777		FALSE	0	MARK2	0	0.50352467
505	1	1	1	0	3	1	FALSE	CLDN10	1	3	0	0	1		FALSE	0	CLDN10	6	0
506	1.66666667	0	0.6	0	1	2	FALSE	FGF1	3	1	0	0	0.66666667		FALSE	0	FGF1	0	0
508	1.66666667	0	0.6	0	1	2	FALSE	ATE1	3	1	0	0	0.66666667		FALSE	0	ATE1	0	0
510	3.72765363	0.01187693	0.26826527	0	25	7	FALSE	CLEC12A	1.16	25	0	0	0.6590433		FALSE	0	CLEC12A	2286748	0.05333333
511	4.7273743	0	0.21153392	0	1	8	FALSE	GOSR1	25	1	0	0	0.53407821		FALSE	0	GOSR1	0	0
513	4.7273743	0	0.21153392	0	1	8	FALSE	IKBIP	25	1	0	0	0.53407821		FALSE	0	IKBIP	0	0
515	4.7273743	0	0.21153392	0	1	8	FALSE	DNAJC1	25	1	0	0	0.53407821		FALSE	0	DNAJC1	0	0
517	2.80195531	0.00579402	0.35689363	0	2	6	FALSE	XPO5	997	2	0	0	0.77475559		FALSE	0	XPO5	1132596	0.50025113
519	4.7273743	0	0.21153392	0	1	8	FALSE	TARSL2	25	1	0	0	0.53407821		FALSE	0	TARSL2	0	0
521	4.7273743	0	0.21153392	0	1	8	FALSE	STX18	25	1	0	0	0.53407821		FALSE	0	STX18	0	0
523	4.7273743	0	0.21153392	0	1	8	FALSE	MESDC2	25	1	0	0	0.53407821		FALSE	0	MESDC2	0	0
525	4.7273743	0	0.21153392	0	1	8	FALSE	BNIP1	25	1	0	0	0.53407821		FALSE	0	BNIP1	0	0
527	2.80195531	0.00579402	0.35689363	0	2	6	FALSE	PBXIP1	997	2	0	0	0.77475559		FALSE	0	PBXIP1	1132596	0.50025113
529	4.7273743	0	0.21153392	0	1	8	FALSE	TMEM57	25	1	0	0	0.53407821		FALSE	0	TMEM57	0	0
531	4.59972067	1.07E-04	0.21740451	0	2	8	FALSE	COLEC12	22.5	2	0	0	0.55003492		FALSE	0	COLEC12	14270	0.5
533	4.7273743	0	0.21153392	0	1	8	FALSE	GAS6	25	1	0	0	0.53407821		FALSE	0	GAS6	0	0
535	4.7273743	0	0.21153392	0	1	8	FALSE	SUN1	25	1	0	0	0.53407821		FALSE	0	SUN1	0	0
537	4.7273743	0	0.21153392	0	1	8	FALSE	STX5	25	1	0	0	0.53407821		FALSE	0	STX5	0	0
539	4.7273743	0	0.21153392	0	1	8	FALSE	VTI1A	25	1	0	0	0.53407821		FALSE	0	VTI1A	0	0
541	4.7273743	0	0.21153392	0	1	8	FALSE	SOX13	25	1	0	0	0.53407821		FALSE	0	SOX13	0	0
543	4.7273743	0	0.21153392	0	1	8	FALSE	GOSR2	25	1	0	0	0.53407821		FALSE	0	GOSR2	0	0
545	4.7273743	0	0.21153392	0	1	8	FALSE	ADAMTS2	25	1	0	0	0.53407821		FALSE	0	ADAMTS2	0	0
547	4.7273743	0	0.21153392	0	1	8	FALSE	VTI1B	25	1	0	0	0.53407821		FALSE	0	VTI1B	0	0
549	4.7273743	0	0.21153392	0	1	8	FALSE	VAMP4	25	1	0	0	0.53407821		FALSE	0	VAMP4	0	0
551	4.7273743	0	0.21153392	0	1	8	FALSE	STX6	25	1	0	0	0.53407821		FALSE	0	STX6	0	0
553	4.7273743	0	0.21153392	0	1	8	FALSE	STX8	25	1	0	0	0.53407821		FALSE	0	STX8	0	0
555	4.7273743	0	0.21153392	0	1	8	FALSE	STX10	25	1	0	0	0.53407821		FALSE	0	STX10	0	0
557	4.7273743	0	0.21153392	0	1	8	FALSE	SNAP47	25	1	0	0	0.53407821		FALSE	0	SNAP47	0	0
559	3.97150838	6.90E-04	0.2517935	0	2	6	FALSE	MAN2A2	67	2	0	0	0.62856145		FALSE	0	MAN2A2	110804	0.5
561	3.62653631	0.00259852	0.27574521	0	13	7	FALSE	CLIC5	2.30769231	13	0	0	0.67168296		FALSE	0	CLIC5	1089942	0.16346154
562	4.62625698	0	0.21615747	0	1	8	FALSE	GSN	13	1	0	0	0.54671788		FALSE	0	GSN	0	0
564	3.9952514	5.08E-05	0.25029714	0	2	6	FALSE	TPRN	45.5	2	0	0	0.62559358		FALSE	0	TPRN	21290	0.50568182
566	2.78882682	8.15E-04	0.35857372	0	3	6	FALSE	SRPK2	683.3333333	3	0	0	0.77639665		FALSE	0	SRPK2	388268	0.33862696
568	2.78882682	8.15E-04	0.35857372	0	3	6	FALSE	IQGAP1	683.3333333	3	0	0	0.77639665		FALSE	0	IQGAP1	388268	0.33862696
570	2.73128492	0.00178012	0.36612804	0.16666667	4	6	FALSE	ACTN1	534.5	4	0	0	0.78358939		FALSE	0	ACTN1	512904	0.25599233
572	2.77765363	0.00135397	0.36001609	0	3	6	FALSE	ACTA1	686.6666667	3	0	0	0.7777933		FALSE	0	ACTA1	463882	0.3372684
574	4.62625698	0	0.21615747	0	1	8	FALSE	CLIC2	13	1	0	0	0.54671788	mRNAup	FALSE	0	CLIC2	0	0
576	2.78743017	8.85E-04	0.35875338	0	3	6	FALSE	EZR	682.3333333	3	0	0	0.77657123		FALSE	0	EZR	383588	0.33796296
578	4.62625698	0	0.21615747	0	1	8	FALSE	LAMTOR5	13	1	0	0	0.54671788		FALSE	0	LAMTOR5	0	0
580	3.45614525	6.35E-04	0.28933969	0	6	7	FALSE	CNTN4	6.66666667	6	0	0	0.69298184	mRNAdown	FALSE	0	CNTN4	97682	0.18888889
581	4.45586592	0	0.22442327	0	1	8	FALSE	APLP1	6	1	0	0	0.56801676		FALSE	0	APLP1	0	0
584	3.61396648	0.00548603	0.27670428	0	20	7	FALSE	COL8A2	1.95	20	0	0	0.67325419		FALSE	0	COL8A2	2244702	0.08636364
585	4.61368715	0	0.21674638	0	1	8	FALSE	COL14A1	20	1	0	0	0.54828911	mRNAup	FALSE	0	COL14A1	0	0
587	4.61368715	0	0.21674638	0	1	8	FALSE	COLGALT2	20	1	0	0	0.54828911		FALSE	0	COLGALT2	0	0
589	4.38575419	3.11E-05	0.22801095	0	2	8	FALSE	COL2A1	25	2	0	0	0.57678073		FALSE	0	COL2A1	13432	0.53333333
591	3.98603352	1.30E-04	0.25087596	0	2	6	FALSE	ALB	39	2	0	0	0.62674581		FALSE	0	ALB	44380	0.5
593	2.80642458	9.76E-04	0.35632527	0	2	6	FALSE	P3H1	994.5	2	0	0	0.77419693		FALSE	0	P3H1	424220	0.50100857
595	3.98156425	1.13E-04	0.25115757	0	2	6	FALSE	CRTAP	49.5	2	0	0	0.62730447		FALSE	0	CRTAP	56958	0.50520833
597	2.77849162	0.00160759	0.35990751	0	3	6	FALSE	VIM	689.3333333	3	0	0	0.77768855		FALSE	0	VIM	718062	0.33841363
599	4.33156425	8.75E-05	0.23086348	0	3	8	FALSE	FN1	21	3	0	0	0.58355447		FALSE	0	FN1	31136	0.35087719
601	4.61368715	0	0.21674638	0	1	8	FALSE	P4HA2	20	1	0	0	0.54828911		FALSE	0	P4HA2	0	0
603	4.38575419	3.11E-05	0.22801095	0	2	8	FALSE	COL1A1	25	2	0	0	0.57678073		FALSE	0	COL1A1	13432	0.53333333
605	4.61368715	0	0.21674638	0	1	8	FALSE	COL8A1	20	1	0	0	0.54828911		FALSE	0	COL8A1	0	0
607	3.96089385	2.05E-04	0.25246827	0	2	6	FALSE	COL4A2	64.5	2	0	0	0.62988827		FALSE	0	COL4A2	44378	0.5
609	2.80642458	9.76E-04	0.35632527	0	2	6	FALSE	LMNA	994.5	2	0	0	0.77419693		FALSE	0	LMNA	424220	0.50100857
611	4.02011173	6.86E-05	0.24874931	0	2	6	FALSE	SGTA	24	2	0	0	0.62248603		FALSE	0	SGTA	27380	0.5
613	4.61368715	0	0.21674638	0	1	8	FALSE	FKBP14	20	1	0	0	0.54828911		FALSE	0	FKBP14	0	0
616	4.38575419	3.11E-05	0.22801095	0	2	8	FALSE	COL5A1	25	2	0	0	0.57678073		FALSE	0	COL5A1	13432	0.53333333
618	4.61368715	0	0.21674638	0	1	8	FALSE	COL18A1	20	1	0	0	0.54828911		FALSE	0	COL18A1	0	0
620	3.01871508	0.0270645	0.33126677	0	87	5	FALSE	COPS7A	3.04597701	87	0	0	0.74766061		FALSE	0	COPS7A	8298222	0.02495094
621	4.01843575	0	0.24885305	0	1	6	FALSE	CSN2	87	1	0	0	0.62269553		FALSE	0	CSN2	0	0
624	4.01843575	0	0.24885305	0	1	6	FALSE	BTBD1	87	1	0	0	0.62269553		FALSE	0	BTBD1	0	0
626	4.01843575	0	0.24885305	0	1	6	FALSE	PQBP1	87	1	0	0	0.62269553		FALSE	0	PQBP1	0	0
628	2.77765363	7.04E-04	0.36001609	0	3	6	FALSE	EIF3E	693.3333333	3	0	0	0.7777933		FALSE	0	EIF3E	305960	0.33987891
630	2.78296089	5.50E-04	0.35932952	0	2	6	FALSE	PRMT5	1028	2	0	0	0.77712989		FALSE	0	PRMT5	253944	0.50641026
632	4.01843575	0	0.24885305	0	1	6	FALSE	E7EM64	87	1	0	0	0.62269553		FALSE	0	E7EM64	0	0
634	4.01843575	0	0.24885305	0	1	6	FALSE	DCAF10	87	1	0	0	0.62269553		FALSE	0	DCAF10	0	0
636	4.01843575	0	0.24885305	0	1	6	FALSE	CT45A3	87	1	0	0	0.62269553		FALSE	0	CT45A3	0	0
638	3.98156425	5.43E-05	0.25115757	0	2	6	FALSE	DDIT3	67.5	2	0	0	0.62730447		FALSE	0	DDIT3	12350	0.51550388
640	3.99273743	5.26E-05	0.25045474	0	2	6	FALSE	c-Jun	55.5	2	0	0	0.62590782		FALSE	0	c-Jun	8358	0.50934579
642	4.01843575	0	0.24885305	0	1	6	FALSE	KCTD20	87	1	0	0	0.62269553		FALSE	0	KCTD20	0	0
644	4.00083799	1.51E-04	0.24994764	0	2	6	FALSE	MCRS1	54	2	0	0	0.62489525		FALSE	0	MCRS1	35882	0.5
646	2.73435754	0.00138444	0.36571662	0.1	5	6	FALSE	CSNK2A1	448.2	5	0	0	0.78320531		FALSE	0	CSNK2A1	553862	0.20984529
648	4.01843575	0	0.24885305	0	1	6	FALSE	B7Z503	87	1	0	0	0.62269553		FALSE	0	B7Z503	0	0
650	4.01843575	0	0.24885305	0	1	6	FALSE	CSN1S1	87	1	0	0	0.62269553		FALSE	0	CSN1S1	0	0
652	2.78296089	5.50E-04	0.35932952	0	2	6	FALSE	WDR77	1028	2	0	0	0.77712989		FALSE	0	WDR77	253944	0.50641026
654	2.78296089	5.50E-04	0.35932952	0	2	6	FALSE	EIF2S2	1028	2	0	0	0.77712989		FALSE	0	EIF2S2	253944	0.50641026
656	3.2896648	3.88E-04	0.30398234	0	5	6	FALSE	JUN	66.6	5	0	0	0.7137919		FALSE	0	JUN	74440	0.21578947
658	4.01843575	0	0.24885305	0	1	6	FALSE	CCDC82	87	1	0	0	0.62269553		FALSE	0	CCDC82	0	0
660	2.76201117	6.05E-04	0.36205502	0.33333333	3	6	FALSE	PSMD4	717.3333333	3	0	0	0.7797486		FALSE	0	PSMD4	269564	0.34388489
662	2.78296089	5.50E-04	0.35932952	0	2	6	FALSE	NUF2	1028	2	0	0	0.77712989		FALSE	0	NUF2	253944	0.50641026
664	3.97877095	1.37E-04	0.25133389	0	2	6	FALSE	CORO1B	66.5	2	0	0	0.62765363		FALSE	0	CORO1B	12742	0.50384615
666	3.32234637	5.17E-04	0.3009921	0.1	5	6	FALSE	p53	63.8	5	0	0	0.7097067		FALSE	0	p53	236468	0.22815884
668	2.70502793	0.00129565	0.36968195	0	4	6	FALSE	CUL1	559.75	4	0	0	0.78687151		FALSE	0	CUL1	714324	0.26158708
670	3.42681564	5.66E-05	0.29181611	0	2	6	FALSE	PTGS2	54	2	0	0	0.69664804	mRNAup	FALSE	0	PTGS2	2380	0.5047619
672	3.38798883	2.53E-04	0.29516036	0	3	6	FALSE	PRKAR2B	55.66666667	3	0	0	0.7015014		FALSE	0	PRKAR2B	21704	0.33954451
674	4.01843575	0	0.24885305	0	1	6	FALSE	RAD17	87	1	0	0	0.62269553		FALSE	0	RAD17	0	0
676	3.98631285	5.04E-05	0.25085838	0	2	6	FALSE	RBX1	56.5	2	0	0	0.62671089		FALSE	0	RBX1	9648	0.50454545
678	4.01843575	0	0.24885305	0	1	6	FALSE	BTBD2	87	1	0	0	0.62269553		FALSE	0	BTBD2	0	0
681	3.9575419	5.80E-05	0.2526821	0	2	6	FALSE	NOD1	76	2	0	0	0.63030726		FALSE	0	NOD1	16282	0.51724138
683	2.67234637	0.00456057	0.37420299	0	5	6	FALSE	CSNK2B	461.6	5	0	0	0.7909567		FALSE	0	CSNK2B	1328406	0.20766456
685	4.01843575	0	0.24885305	0	1	6	FALSE	DCAF4	87	1	0	0	0.62269553		FALSE	0	DCAF4	0	0
687	4.01843575	0	0.24885305	0	1	6	FALSE	NLRP3	87	1	0	0	0.62269553		FALSE	0	NLRP3	0	0
689	4.01843575	0	0.24885305	0	1	6	FALSE	E9PGT6	87	1	0	0	0.62269553		FALSE	0	E9PGT6	0	0
691	4.01843575	0	0.24885305	0	1	6	FALSE	C20orf94	87	1	0	0	0.62269553		FALSE	0	C20orf94	0	0
694	4.01843575	0	0.24885305	0	1	6	FALSE	COPS2	87	1	0	0	0.62269553		FALSE	0	COPS2	0	0
696	4.01843575	0	0.24885305	0	1	6	FALSE	BABAM1	87	1	0	0	0.62269553		FALSE	0	BABAM1	0	0
698	2.67877095	0.00313802	0.37330553	0.03571429	8	6	FALSE	COPS5	294.125	8	0	0	0.79015363		FALSE	0	COPS5	1290724	0.13390005
700	2.77122905	8.13E-04	0.36085072	0	3	6	FALSE	COPS3	701	3	0	0	0.77859637		FALSE	0	COPS3	346088	0.34146341
702	2.78296089	5.50E-04	0.35932952	0	2	6	FALSE	ARHGEF2	1028	2	0	0	0.77712989		FALSE	0	ARHGEF2	253944	0.50641026
704	2.70558659	0.00103243	0.36960562	0	3	6	FALSE	CUL5	745.6666667	3	0	0	0.78680168		FALSE	0	CUL5	671678	0.34862672
706	4.01843575	0	0.24885305	0	1	6	FALSE	PSMD12	87	1	0	0	0.62269553		FALSE	0	PSMD12	0	0
708	4.01843575	0	0.24885305	0	1	6	FALSE	F5GZ90	87	1	0	0	0.62269553		FALSE	0	F5GZ90	0	0
711	4.01843575	0	0.24885305	0	1	6	FALSE	DCAF11	87	1	0	0	0.62269553		FALSE	0	DCAF11	0	0
713	4.01843575	0	0.24885305	0	1	6	FALSE	EPB41L1	87	1	0	0	0.62269553		FALSE	0	EPB41L1	0	0
715	4.01843575	0	0.24885305	0	1	6	FALSE	PRKD1	87	1	0	0	0.62269553		FALSE	0	PRKD1	0	0
717	4.01843575	0	0.24885305	0	1	6	FALSE	TNRC18	87	1	0	0	0.62269553		FALSE	0	TNRC18	0	0
719	2.77122905	8.13E-04	0.36085072	0	3	6	FALSE	COPS4	701	3	0	0	0.77859637		FALSE	0	COPS4	346088	0.34146341
721	4.01843575	0	0.24885305	0	1	6	FALSE	CSN3	87	1	0	0	0.62269553		FALSE	0	CSN3	0	0
723	2.77067039	0.00125498	0.36092348	0	3	6	FALSE	KLHL13	694.6666667	3	0	0	0.7786662		FALSE	0	KLHL13	356944	0.33870443
725	2.78296089	5.50E-04	0.35932952	0	2	6	FALSE	GPS1	1028	2	0	0	0.77712989		FALSE	0	GPS1	253944	0.50641026
727	4.01061453	5.12E-05	0.24933835	0	2	6	FALSE	PMF1	51	2	0	0	0.62367318		FALSE	0	PMF1	4150	0.50505051
729	2.78296089	5.50E-04	0.35932952	0	2	6	FALSE	TOR1AIP1	1028	2	0	0	0.77712989		FALSE	0	TOR1AIP1	253944	0.50641026
732	3.04944134	0.01651464	0.32792892	0	46	5	FALSE	CORO1A	3.30434783	46	0	0	0.74381983	mRNAup	FALSE	0	CORO1A	2257604	0.0299266
733	4.04916201	0	0.24696468	0	1	6	FALSE	IFT172	46	1	0	0	0.61885475		FALSE	0	IFT172	0	0
735	4.04916201	0	0.24696468	0	1	6	FALSE	IFT80	46	1	0	0	0.61885475		FALSE	0	IFT80	0	0
737	4.04916201	0	0.24696468	0	1	6	FALSE	SPATA20	46	1	0	0	0.61885475		FALSE	0	SPATA20	0	0
739	4.02513966	2.16E-04	0.24843858	0	2	6	FALSE	THBS1	38	2	0	0	0.62185754		FALSE	0	THBS1	52330	0.5
741	4.04916201	0	0.24696468	0	1	6	FALSE	BICD2	46	1	0	0	0.61885475		FALSE	0	BICD2	0	0
743	4.04916201	0	0.24696468	0	1	6	FALSE	RABGAP1L	46	1	0	0	0.61885475		FALSE	0	RABGAP1L	0	0
745	2.79553073	9.13E-04	0.35771383	0	2	6	FALSE	VARS	1007.5	2	0	0	0.77555866		FALSE	0	VARS	170522	0.50224551
747	2.77849162	0.00176608	0.35990751	0	3	6	FALSE	RABGAP1	685.3333333	3	0	0	0.77768855		FALSE	0	RABGAP1	663106	0.33644707
749	4.04916201	0	0.24696468	0	1	6	FALSE	FSD2	46	1	0	0	0.61885475		FALSE	0	FSD2	0	0
751	4.04916201	0	0.24696468	0	1	6	FALSE	TRAF7	46	1	0	0	0.61885475		FALSE	0	TRAF7	0	0
753	4.04916201	0	0.24696468	0	1	6	FALSE	GIT2	46	1	0	0	0.61885475		FALSE	0	GIT2	0	0
755	4.04916201	0	0.24696468	0	1	6	FALSE	TJAP1	46	1	0	0	0.61885475		FALSE	0	TJAP1	0	0
758	4.00949721	7.85E-05	0.24940783	0	2	6	FALSE	SMAD3	47	2	0	0	0.62381285		FALSE	0	SMAD3	7834	0.50549451
760	4.04916201	0	0.24696468	0	1	6	FALSE	FAM208A	46	1	0	0	0.61885475		FALSE	0	FAM208A	0	0
762	4.04916201	0	0.24696468	0	1	6	FALSE	CORO6	46	1	0	0	0.61885475		FALSE	0	CORO6	0	0
764	2.73324022	0.00268211	0.36586612	0	5	6	FALSE	ACTR2	440.8	5	0	0	0.78334497		FALSE	0	ACTR2	798596	0.20784499
766	2.79553073	9.13E-04	0.35771383	0	2	6	FALSE	POLR1C	1007.5	2	0	0	0.77555866		FALSE	0	POLR1C	170522	0.50224551
768	4.04916201	0	0.24696468	0	1	6	FALSE	CEP44	46	1	0	0	0.61885475		FALSE	0	CEP44	0	0
771	3.4150838	5.77E-05	0.29281858	0	2	6	FALSE	CORO2A	53.5	2	0	0	0.69811453		FALSE	0	CORO2A	6920	0.51470588
774	4.03938547	6.41E-05	0.24756241	0	2	6	FALSE	POT1	27.5	2	0	0	0.62007682		FALSE	0	POT1	11766	0.5
776	2.78296089	9.71E-04	0.35932952	0.33333333	3	6	FALSE	SMARCD1	692	3	0	0	0.77712989		FALSE	0	SMARCD1	177442	0.33855441
778	4.04916201	0	0.24696468	0	1	6	FALSE	POC1B	46	1	0	0	0.61885475		FALSE	0	POC1B	0	0
780	4.04916201	0	0.24696468	0	1	6	FALSE	LMO2	46	1	0	0	0.61885475		FALSE	0	LMO2	0	0
782	2.74776536	0.00198703	0.36393209	0	4	6	FALSE	ACTR3	541.25	4	0	0	0.78152933		FALSE	0	ACTR3	649912	0.25849282
784	2.77849162	0.00176608	0.35990751	0	3	6	FALSE	STAT3	685.3333333	3	0	0	0.77768855		FALSE	0	STAT3	663106	0.33644707
786	4.04916201	0	0.24696468	0	1	6	FALSE	YTHDC1	46	1	0	0	0.61885475		FALSE	0	YTHDC1	0	0
788	4.01089385	2.70E-05	0.24932098	0	2	6	FALSE	FHL3	31.5	2	0	0	0.62363827		FALSE	0	FHL3	5026	0.50833333
790	4.04916201	0	0.24696468	0	1	6	FALSE	IFT20	46	1	0	0	0.61885475		FALSE	0	IFT20	0	0
792	4.04916201	0	0.24696468	0	1	6	FALSE	MAGOH	46	1	0	0	0.61885475		FALSE	0	MAGOH	0	0
795	3.59748603	0.00148972	0.27797189	0	8	7	FALSE	CREG1	2.625	8	0	0	0.67531425		FALSE	0	CREG1	287250	0.14772727
796	4.5972067	0	0.21752339	0	1	8	FALSE	TBP	8	1	0	0	0.55034916		FALSE	0	TBP	0	0
798	4.06927374	2.87E-05	0.2457441	0	2	6	FALSE	IGF2R	11.5	2	0	0	0.61634078		FALSE	0	IGF2R	6492	0.5
800	2.78687151	9.61E-04	0.3588253	0	3	6	FALSE	RB1	682.6666667	3	0	0	0.77664106		FALSE	0	RB1	312944	0.33829611
802	2.81061453	5.30E-04	0.35579408	0	2	6	FALSE	RBL1	988.5	2	0	0	0.77367318		FALSE	0	RBL1	98826	0.50050684
804	4.5972067	0	0.21752339	0	1	8	FALSE	RBL2	8	1	0	0	0.55034916		FALSE	0	RBL2	0	0
806	3.0924581	0.00136788	0.32336736	0	7	5	FALSE	DAP	13.85714286	7	0	0	0.73844274		FALSE	0	DAP	109288	0.16483516
809	2.81173184	3.11E-04	0.35565269	0	2	6	FALSE	UNC5C	988	2	0	0	0.77353352	mRNAdown	FALSE	0	UNC5C	21904	0.5005071
811	3.03519553	0.00260769	0.32946807	0.04545455	13	5	FALSE	DCBLD2	18.66666667	13	0	1	0.74560056		FALSE	0	DCBLD2	224070	0.09677419
813	2.72849162	0.00195721	0.36650287	0	4	6	FALSE	TRAF6	532	4	0	0	0.78393855		FALSE	0	TRAF6	583976	0.25541126
816	2.7877095	3.06E-04	0.35871743	0	2	6	FALSE	CRKL	990.5	2	0	0	0.77653631		FALSE	0	CRKL	31152	0.50101266
818	3.06899441	0.00608083	0.32583963	0	21	5	FALSE	DCTN6	6	21	0	0	0.7413757		FALSE	0	DCTN6	663590	0.06329114
819	2.80810056	4.42E-04	0.3561126	0	2	6	FALSE	RPSA	995	2	0	0	0.77398743		FALSE	0	RPSA	63716	0.50176678
821	4.06871508	0	0.24577784	0	1	6	FALSE	DCTN5	21	1	0	0	0.61641061		FALSE	0	DCTN5	0	0
824	3.00335196	0.00992873	0.33296131	0.00647549	48	5	FALSE	DTL	6.44680851	48	0	1	0.74958101		FALSE	0	DTL	2391844	0.03228173
827	2.76731844	0.00147746	0.36136065	0.1	5	6	FALSE	YWHAE	423.6	5	0	0	0.7790852		FALSE	0	YWHAE	316226	0.20533981
829	3.98044693	2.01E-05	0.25122807	0	2	6	FALSE	CDT1	31.5	2	0	0	0.62744413		FALSE	0	CDT1	3366	0.51694915
832	2.67290503	0.00361228	0.37412478	0	6	6	FALSE	YWHAZ	381.5	6	0	0	0.79088687		FALSE	0	YWHAZ	1030682	0.1743813
835	2.4122905	0.02929616	0.41454377	0.00921053	98	5	FALSE	MSH6	24.14583333	98	0	2	0.82346369		FALSE	0	MSH6	1774554	0.0113989
837	4.00307263	0	0.24980811	0	1	6	FALSE	FBXO11	47	1	0	0	0.62461592		FALSE	0	FBXO11	0	0
839	2.78603352	0.00104888	0.35893323	0	3	6	FALSE	WDR5	685.6666667	3	0	0	0.77674581		FALSE	0	WDR5	581946	0.33877618
841	2.80195531	2.44E-04	0.35689363	0	2	6	FALSE	HLTF	1008	2	0	0	0.77475559		FALSE	0	HLTF	87500	0.50501505
843	2.70083799	0.00257693	0.37025546	0	5	6	FALSE	YWHAQ	442	5	0	0	0.78739525		FALSE	0	YWHAQ	735158	0.2069451
845	4.00307263	0	0.24980811	0	1	6	FALSE	SHPRH	47	1	0	0	0.62461592		FALSE	0	SHPRH	0	0
847	3.27653631	3.10E-04	0.30520034	0	4	6	FALSE	MDM2	75	4	0	0	0.71543296		FALSE	0	MDM2	40746	0.26428571
849	3.93407821	9.53E-05	0.25418915	0	3	6	FALSE	UBE2N	50	3	0	0	0.63324022		FALSE	0	UBE2N	14406	0.35
851	4.00307263	0	0.24980811	0	1	6	FALSE	TOB1	47	1	0	0	0.62461592		FALSE	0	TOB1	0	0
853	2.77932961	6.82E-04	0.35979899	0	3	6	FALSE	SFN	694.6666667	3	0	0	0.7775838	mRNAdown	FALSE	0	SFN	305248	0.34086814
856	4.00307263	0	0.24980811	0	1	6	FALSE	RAD18	47	1	0	0	0.62461592		FALSE	0	RAD18	0	0
858	4.00307263	0	0.24980811	0	1	6	FALSE	FBXO18	47	1	0	0	0.62461592		FALSE	0	FBXO18	0	0
860	4.00307263	0	0.24980811	0	1	6	FALSE	GRWD1	47	1	0	0	0.62461592		FALSE	0	GRWD1	0	0
863	2.69413408	0.00133354	0.37117678	0	4	6	FALSE	CUL4B	571	4	0	0	0.78823324		FALSE	0	CUL4B	773804	0.26425591
866	2.78631285	2.44E-04	0.35889724	0.66666667	3	6	FALSE	MSH2	704	3	0	0	0.77671089		FALSE	0	MSH2	87500	0.3432472
868	2.72374302	6.84E-04	0.36714183	0	3	6	FALSE	TUBG1	732.3333333	3	0	0	0.78453212		FALSE	0	TUBG1	484086	0.34759189
871	4.00307263	0	0.24980811	0	1	6	FALSE	AURKB	47	1	0	0	0.62461592		FALSE	0	AURKB	0	0
873	2.48659218	0.00854978	0.40215682	0.01904762	22	5	FALSE	ELMO1	98.85714286	22	0	1	0.81417598	mRNAup	FALSE	0	ELMO1	182516	0.04820405
874	3.48631285	0	0.28683599	0	1	6	FALSE	TTC19	21	1	0	0	0.68921089		FALSE	0	TTC19	0	0
877	3.48631285	0	0.28683599	0	1	6	FALSE	DOCK5	21	1	0	0	0.68921089		FALSE	0	DOCK5	0	0
879	2.8103352	0	0.35582944	1	2	6	FALSE	USP4	995	2	0	0	0.7737081		FALSE	0	USP4	0	0.50125945
881	3.48631285	0	0.28683599	0	1	6	FALSE	HCK	21	1	0	0	0.68921089	mRNAup	FALSE	0	HCK	0	0
883	3.48631285	0	0.28683599	0	1	6	FALSE	TRIM54	21	1	0	0	0.68921089		FALSE	0	TRIM54	0	0
885	3.48631285	0	0.28683599	0	1	6	FALSE	CALML3	21	1	0	0	0.68921089		FALSE	0	CALML3	0	0
887	3.31955307	2.87E-04	0.30124537	0	5	6	FALSE	RAC1	52	5	0	0	0.71005587		FALSE	0	RAC1	30220	0.21338912
889	2.8103352	0	0.35582944	1	2	6	FALSE	DOCK4	995	2	0	0	0.7737081		FALSE	0	DOCK4	0	0.50125945
891	3.48631285	0	0.28683599	0	1	6	FALSE	ELMO2	21	1	0	0	0.68921089		FALSE	0	ELMO2	0	0
893	3.48631285	0	0.28683599	0	1	6	FALSE	FGD1	21	1	0	0	0.68921089		FALSE	0	FGD1	0	0
895	3.48631285	0	0.28683599	0	1	6	FALSE	DOCK3	21	1	0	0	0.68921089		FALSE	0	DOCK3	0	0
897	3.48519553	2.68E-06	0.28692795	0	2	6	FALSE	RHOG	12	2	0	0	0.68935056		FALSE	0	RHOG	88	0.52380952
899	3.48631285	0	0.28683599	0	1	6	FALSE	ZNF398	21	1	0	0	0.68921089		FALSE	0	ZNF398	0	0
901	3.48631285	0	0.28683599	0	1	6	FALSE	MED31	21	1	0	0	0.68921089		FALSE	0	MED31	0	0
904	3.09860335	6.56E-04	0.32272604	0	3	5	FALSE	ELMOD2	26	3	0	0	0.73767458		FALSE	0	ELMOD2	19702	0.33783784
906	4.09832402	0	0.24400218	0	1	6	FALSE	HOXC4	3	1	0	0	0.6127095		FALSE	0	HOXC4	0	0
908	3.00670391	0.03077227	0.33259012	0	78	5	FALSE	EPS8	2.97435897	78	0	0	0.74916201		FALSE	0	EPS8	6218532	0.0224359
909	4.00642458	0	0.24959911	0	1	6	FALSE	TDP2	78	1	0	0	0.62419693		FALSE	0	TDP2	0	0
911	4.00642458	0	0.24959911	0	1	6	FALSE	SCRN3	78	1	0	0	0.62419693		FALSE	0	SCRN3	0	0
913	4.00642458	0	0.24959911	0	1	6	FALSE	CCDC85B	78	1	0	0	0.62419693		FALSE	0	CCDC85B	0	0
916	4.00642458	0	0.24959911	0	1	6	FALSE	MYO15A	78	1	0	0	0.62419693		FALSE	0	MYO15A	0	0
918	4.00642458	0	0.24959911	0	1	6	FALSE	HOOK2	78	1	0	0	0.62419693		FALSE	0	HOOK2	0	0
920	4.00642458	0	0.24959911	0	1	6	FALSE	GOLGA8EP	78	1	0	0	0.62419693		FALSE	0	GOLGA8EP	0	0
922	3.98519553	5.50E-05	0.25092872	0	2	6	FALSE	C17orf59	51	2	0	0	0.62685056		FALSE	0	C17orf59	8708	0.51020408
924	4.00642458	0	0.24959911	0	1	6	FALSE	RCAN3	78	1	0	0	0.62419693		FALSE	0	RCAN3	0	0
926	4.00642458	0	0.24959911	0	1	6	FALSE	DNALI1	78	1	0	0	0.62419693		FALSE	0	DNALI1	0	0
928	2.7801676	0.00140803	0.35969055	0	3	6	FALSE	ITGB1	683	3	0	0	0.77747905		FALSE	0	ITGB1	317152	0.33612617
930	2.59944134	0.00784334	0.38469804	0.06666667	10	6	FALSE	GRB2	253.7	10	0	0	0.80006983		FALSE	0	GRB2	1774256	0.10853345
932	4.00642458	0	0.24959911	0	1	6	FALSE	XAGE2	78	1	0	0	0.62419693		FALSE	0	XAGE2	0	0
934	2.78100559	9.31E-04	0.35958216	0	2	6	FALSE	HNRNPC	1023.5	2	0	0	0.7773743		FALSE	0	HNRNPC	279020	0.50419132
936	2.74273743	0.00566344	0.36459925	0.16666667	4	6	FALSE	XRCC6	543.25	4	0	0	0.78215782		FALSE	0	XRCC6	952414	0.25637695
940	4.00642458	0	0.24959911	0	1	6	FALSE	C6orf141	78	1	0	0	0.62419693		FALSE	0	C6orf141	0	0
942	4.00642458	0	0.24959911	0	1	6	FALSE	GULP1	78	1	0	0	0.62419693		FALSE	0	GULP1	0	0
944	4.00642458	0	0.24959911	0	1	6	FALSE	ITGB3	78	1	0	0	0.62419693		FALSE	0	ITGB3	0	0
946	4.00642458	0	0.24959911	0	1	6	FALSE	RSPH14	78	1	0	0	0.62419693		FALSE	0	RSPH14	0	0
948	2.68351955	0.00409751	0.37264495	0.0952381	7	6	FALSE	CBL	335.7142857	7	0	0	0.78956006		FALSE	0	CBL	1110394	0.15116953
950	4.00642458	0	0.24959911	0	1	6	FALSE	TEX28P2	78	1	0	0	0.62419693		FALSE	0	TEX28P2	0	0
952	2.78100559	9.31E-04	0.35958216	0	2	6	FALSE	AIMP2	1023.5	2	0	0	0.7773743		FALSE	0	AIMP2	279020	0.50419132
954	4.00642458	0	0.24959911	0	1	6	FALSE	PLDN	78	1	0	0	0.62419693		FALSE	0	PLDN	0	0
956	4.00642458	0	0.24959911	0	1	6	FALSE	ZZZ3	78	1	0	0	0.62419693		FALSE	0	ZZZ3	0	0
958	4.00642458	0	0.24959911	0	1	6	FALSE	NACC2	78	1	0	0	0.62419693		FALSE	0	NACC2	0	0
960	4.00642458	0	0.24959911	0	1	6	FALSE	CD3E	78	1	0	0	0.62419693	mRNAup	FALSE	0	CD3E	0	0
962	2.78100559	9.31E-04	0.35958216	0	2	6	FALSE	SLC27A4	1023.5	2	0	0	0.7773743		FALSE	0	SLC27A4	279020	0.50419132
964	4.00642458	0	0.24959911	0	1	6	FALSE	NFKB2	78	1	0	0	0.62419693		FALSE	0	NFKB2	0	0
966	4.00642458	0	0.24959911	0	1	6	FALSE	ITGB7	78	1	0	0	0.62419693		FALSE	0	ITGB7	0	0
968	4.00642458	0	0.24959911	0	1	6	FALSE	INPP5J	78	1	0	0	0.62419693		FALSE	0	INPP5J	0	0
970	4.00642458	0	0.24959911	0	1	6	FALSE	SERPINA5	78	1	0	0	0.62419693		FALSE	0	SERPINA5	0	0
972	4.00642458	0	0.24959911	0	1	6	FALSE	MRPL20	78	1	0	0	0.62419693		FALSE	0	MRPL20	0	0
974	4.00642458	0	0.24959911	0	1	6	FALSE	GOLGA8DP	78	1	0	0	0.62419693		FALSE	0	GOLGA8DP	0	0
976	4.00642458	0	0.24959911	0	1	6	FALSE	ITGB5	78	1	0	0	0.62419693		FALSE	0	ITGB5	0	0
978	4.00642458	0	0.24959911	0	1	6	FALSE	C19orf25	78	1	0	0	0.62419693		FALSE	0	C19orf25	0	0
980	3.98184358	6.18E-05	0.25113995	0	2	6	FALSE	MAP3K11	51	2	0	0	0.62726955		FALSE	0	MAP3K11	6558	0.50505051
983	4.00642458	0	0.24959911	0	1	6	FALSE	RFXAP	78	1	0	0	0.62419693		FALSE	0	RFXAP	0	0
985	4.00642458	0	0.24959911	0	1	6	FALSE	SMARCE1	78	1	0	0	0.62419693		FALSE	0	SMARCE1	0	0
988	2.77150838	0.00157275	0.36081435	0	3	6	FALSE	PCM1	690.3333333	3	0	0	0.77856145		FALSE	0	PCM1	378460	0.33708231
990	4.00642458	0	0.24959911	0	1	6	FALSE	FBXW5	78	1	0	0	0.62419693		FALSE	0	FBXW5	0	0
992	2.78100559	9.31E-04	0.35958216	0	2	6	FALSE	SF3B3	1023.5	2	0	0	0.7773743		FALSE	0	SF3B3	279020	0.50419132
994	4.00642458	0	0.24959911	0	1	6	FALSE	BLOC1S6	78	1	0	0	0.62419693		FALSE	0	BLOC1S6	0	0
996	3.09972067	0	0.32260971	0	1	5	FALSE	FAM108B1	75	1	0	0	0.73753492		FALSE	0	FAM108B1	0	0
998	4.33743017	0	0.23055126	0	1	7	FALSE	FAM47E	14	1	0	0	0.58282123		FALSE	0	FAM47E	0	0
1000	4.97458101	0.00111716	0.20102196	0	3	7	FALSE	FLRT2	2.33333333	3	0	0	0.50317737		FALSE	0	FLRT2	348654	0.33333333
1001	5.97430168	0	0.16738358	0	1	8	FALSE	B4DYC6	3	1	0	0	0.37821229		FALSE	0	B4DYC6	0	0
1003	3.08463687	3.70E-04	0.32418727	0	8	5	FALSE	FOXRED1	13.125	8	0	0	0.73942039		FALSE	0	FOXRED1	104160	0.16166667
1004	4.04944134	4.88E-06	0.24694764	0	2	6	FALSE	NDUFS5	30	2	0	0	0.61881983		FALSE	0	NDUFS5	528	0.51785714
1008	3.32178771	7.16E-04	0.30104272	0.02777778	10	6	FALSE	GAB3	10.11111111	10	0	1	0.70977654		FALSE	0	GAB3	49422	0.12785388
1010	2.80251397	2.53E-04	0.35682249	0	3	6	FALSE	PTPN11	660.6666667	3	0	0	0.77468575		FALSE	0	PTPN11	60984	0.33468628
1012	3.0226257	0.01903187	0.33083819	6.05E-04	59	5	FALSE	GRAP2	3.55172414	59	0	1	0.74717179		FALSE	0	GRAP2	3912358	0.02780868
1015	2.80307263	1.10E-04	0.35675137	0	2	6	FALSE	PIK3R1	989	2	0	0	0.77461592		FALSE	0	PIK3R1	9724	0.50126839
1018	2.79106145	6.43E-04	0.35828663	0.33333333	3	6	FALSE	ABL1	678.6666667	3	0	0	0.77611732		FALSE	0	ABL1	179288	0.33747927
1020	4.32150838	0	0.23140069	0	1	7	FALSE	CSF1	9	1	0	0	0.58481145		FALSE	0	CSF1	0	0
1022	2.78044693	9.02E-04	0.35965441	0	4	6	FALSE	LYN	513.25	4	0	0	0.77744413	mRNAup	FALSE	0	LYN	372712	0.25447094
1024	3.07067039	0.01060188	0.32566178	0	27	5	FALSE	GNA15	4.62962963	27	0	0	0.7411662		FALSE	0	GNA15	723632	0.04653371
1025	4.07039106	0	0.24567664	0	1	6	FALSE	CNR1	27	1	0	0	0.61620112		FALSE	0	CNR1	0	0
1028	4.01117318	4.92E-05	0.24930362	0	2	6	FALSE	CHRM2	53	2	0	0	0.62360335	mRNAdown	FALSE	0	CHRM2	5470	0.51485149
1031	3.44776536	3.32E-05	0.29004294	0	2	6	FALSE	ADRB2	30	2	0	0	0.69402933	mRNAup	FALSE	0	ADRB2	3752	0.50877193
1033	4.07039106	0	0.24567664	0	1	6	FALSE	A8K1F4	27	1	0	0	0.61620112		FALSE	0	A8K1F4	0	0
1035	1	1	1	0	3	1	FALSE	GPR20	1	3	0	0	1		FALSE	0	GPR20	6	0
1036	1.66666667	0	0.6	0	1	2	FALSE	JAM2	3	1	0	0	0.66666667		FALSE	0	JAM2	0	0
1038	1.66666667	0	0.6	0	1	2	FALSE	ZNRD1	3	1	0	0	0.66666667		FALSE	0	ZNRD1	0	0
1040	1.66666667	0	0.6	0	1	2	FALSE	RPL31	3	1	0	0	0.66666667		FALSE	0	RPL31	0	0
1042	4.02234637	0	0.24861111	0	1	6	FALSE	BLNK	58	1	0	0	0.6222067		FALSE	0	BLNK	0	0
1044	4.02234637	0	0.24861111	0	1	6	FALSE	SPRY2	58	1	0	0	0.6222067		FALSE	0	SPRY2	0	0
1046	4.02234637	0	0.24861111	0	1	6	FALSE	FYB	58	1	0	0	0.6222067	mRNAup	FALSE	0	FYB	0	0
1048	2.78379888	8.99E-04	0.35922135	0	3	6	FALSE	USP8	684.3333333	3	0	0	0.77702514		FALSE	0	USP8	243434	0.33794923
1050	2.79189944	5.33E-04	0.35817909	0	2	6	FALSE	CBLB	1013.5	2	0	0	0.77601257		FALSE	0	CBLB	169564	0.5044843
1052	4.02234637	0	0.24861111	0	1	6	FALSE	PRPH2	58	1	0	0	0.6222067		FALSE	0	PRPH2	0	0
1054	4.02234637	0	0.24861111	0	1	6	FALSE	ANAPC16	58	1	0	0	0.6222067		FALSE	0	ANAPC16	0	0
1056	4.02234637	0	0.24861111	0	1	6	FALSE	SNX18	58	1	0	0	0.6222067		FALSE	0	SNX18	0	0
1058	3.94916201	8.08E-05	0.25321828	0	2	6	FALSE	SHB	68	2	0	0	0.63135475		FALSE	0	SHB	15926	0.51538462
1060	2.76340782	0.00120132	0.36187203	0	3	6	FALSE	KHDRBS1	702	3	0	0	0.77957402		FALSE	0	KHDRBS1	417754	0.34045653
1062	4.02234637	0	0.24861111	0	1	6	FALSE	LAX1	58	1	0	0	0.6222067	mRNAup	FALSE	0	LAX1	0	0
1064	2.79189944	5.33E-04	0.35817909	0	2	6	FALSE	SOS2	1013.5	2	0	0	0.77601257		FALSE	0	SOS2	169564	0.5044843
1067	4.02234637	0	0.24861111	0	1	6	FALSE	ZSCAN21	58	1	0	0	0.6222067		FALSE	0	ZSCAN21	0	0
1069	3.40446927	4.75E-05	0.29373154	0	3	6	FALSE	KIT	48.33333333	3	0	0	0.69944134	mRNAdown	FALSE	0	KIT	7636	0.36692506
1071	3.95363128	1.34E-04	0.25293203	0	3	6	FALSE	ITCH	49.66666667	3	0	0	0.63079609		FALSE	0	ITCH	18212	0.34515366
1073	4.02234637	0	0.24861111	0	1	6	FALSE	BEND5	58	1	0	0	0.6222067		FALSE	0	BEND5	0	0
1075	4.02234637	0	0.24861111	0	1	6	FALSE	ANAPC2	58	1	0	0	0.6222067		FALSE	0	ANAPC2	0	0
1077	4.02234637	0	0.24861111	0	1	6	FALSE	TRIM68	58	1	0	0	0.6222067		FALSE	0	TRIM68	0	0
1079	4.02234637	0	0.24861111	0	1	6	FALSE	KRTAP4-12	58	1	0	0	0.6222067		FALSE	0	KRTAP4-12	0	0
1082	4.02234637	0	0.24861111	0	1	6	FALSE	STAMBP	58	1	0	0	0.6222067		FALSE	0	STAMBP	0	0
1084	2.79189944	5.33E-04	0.35817909	0	2	6	FALSE	ANAPC1	1013.5	2	0	0	0.77601257		FALSE	0	ANAPC1	169564	0.5044843
1086	4.02234637	0	0.24861111	0	1	6	FALSE	TNIP1	58	1	0	0	0.6222067		FALSE	0	TNIP1	0	0
1088	4.02234637	0	0.24861111	0	1	6	FALSE	CD28	58	1	0	0	0.6222067		FALSE	0	CD28	0	0
1091	2.77541899	5.95E-04	0.36030596	0.33333333	4	6	FALSE	GAB1	534.25	4	0	0	0.77807263		FALSE	0	GAB1	180754	0.25859564
1093	4.02234637	0	0.24861111	0	1	6	FALSE	ZBTB7B	58	1	0	0	0.6222067		FALSE	0	ZBTB7B	0	0
1095	4.02234637	0	0.24861111	0	1	6	FALSE	MAP4K1	58	1	0	0	0.6222067	mRNAup	FALSE	0	MAP4K1	0	0
1097	2.79189944	5.33E-04	0.35817909	0	2	6	FALSE	PTPN23	1013.5	2	0	0	0.77601257		FALSE	0	PTPN23	169564	0.5044843
1099	2.75810056	0.00154493	0.36256836	0	3	6	FALSE	SHC1	701.6666667	3	0	0	0.78023743		FALSE	0	SHC1	464510	0.33914166
1101	3.99385475	8.87E-05	0.25038467	0	2	6	FALSE	ANAPC5	53	2	0	0	0.62576816		FALSE	0	ANAPC5	6352	0.50485437
1103	2.79189944	5.33E-04	0.35817909	0	2	6	FALSE	GAREM	1013.5	2	0	0	0.77601257		FALSE	0	GAREM	169564	0.5044843
1105	4.02234637	0	0.24861111	0	1	6	FALSE	ANAPC7	58	1	0	0	0.6222067		FALSE	0	ANAPC7	0	0
1107	4.02178771	5.59E-04	0.24864565	0	2	6	FALSE	RBPMS	29.5	2	0	0	0.62227654		FALSE	0	RBPMS	97904	0.5
1109	2.79189944	5.33E-04	0.35817909	0	2	6	FALSE	CDC27	1013.5	2	0	0	0.77601257		FALSE	0	CDC27	169564	0.5044843
1113	3.95698324	1.47E-04	0.25271777	0	2	6	FALSE	CDC23	72.5	2	0	0	0.63037709		FALSE	0	CDC23	13636	0.50352113
1115	3.3301676	2.69E-04	0.30028519	0	5	6	FALSE	ERBB2	57.8	5	0	0	0.70872905		FALSE	0	ERBB2	53290	0.25244444
1117	4.02234637	0	0.24861111	0	1	6	FALSE	LCP2	58	1	0	0	0.6222067	mRNAup	FALSE	0	LCP2	0	0
1119	2.79189944	5.33E-04	0.35817909	0	2	6	FALSE	GNB2L1	1013.5	2	0	0	0.77601257		FALSE	0	GNB2L1	169564	0.5044843
1121	3.40670391	3.79E-05	0.29353887	0	2	6	FALSE	LAT	66.5	2	0	0	0.69916201	mRNAup	FALSE	0	LAT	6712	0.524
1123	4.02234637	0	0.24861111	0	1	6	FALSE	CSF1R	58	1	0	0	0.6222067		FALSE	0	CSF1R	0	0
1125	3.06843575	0.00362015	0.32589895	0	9	5	FALSE	HAPLN1	11.22222222	9	0	0	0.74144553	mRNAdown	FALSE	0	HAPLN1	178310	0.12939522
1128	3.09748603	0.00168762	0.32284246	0	5	5	FALSE	HCN1	16.4	5	0	0	0.73781425		FALSE	0	HCN1	69016	0.20810811
1129	4.0972067	0	0.24406872	0	1	6	FALSE	HCN4	5	1	0	0	0.61284916		FALSE	0	HCN4	0	0
1131	4.0972067	0	0.24406872	0	1	6	FALSE	HCN3	5	1	0	0	0.61284916		FALSE	0	HCN3	0	0
1133	4.0972067	0	0.24406872	0	1	6	FALSE	HCN2	5	1	0	0	0.61284916		FALSE	0	HCN2	0	0
1135	1	1	1	0	5	1	FALSE	HLA-DOB	1	5	0	0	1	mRNAup	FALSE	0	HLA-DOB	20	0
1136	1.8	0	0.55555556	0	1	2	FALSE	HLA-DMA	5	1	0	0	0.6	mRNAup	FALSE	0	HLA-DMA	0	0
1138	1.8	0	0.55555556	0	1	2	FALSE	HLA-DMB	5	1	0	0	0.6	mRNAup	FALSE	0	HLA-DMB	0	0
1140	3.77094972	0	0.26518519	0	1	7	FALSE	HTR1F	5	1	0	0	0.65363128	mRNAdown	FALSE	0	HTR1F	0	0
1141	2.77122905	0.00209615	0.36085072	0	5	6	FALSE	CAV1	417.4	5	0	0	0.77859637		FALSE	0	CAV1	443994	0.2037182
1143	3.0952514	8.98E-05	0.32307553	0	2	5	FALSE	IAH1	44.5	2	0	0	0.73809358		FALSE	0	IAH1	23284	0.55769231
1146	3.07793296	0.00642188	0.32489337	0	24	5	FALSE	IFT74	5.375	24	0	0	0.74025838		FALSE	0	IFT74	796096	0.05756579
1148	4.07765363	0	0.24523907	0	1	6	FALSE	GLI1	24	1	0	0	0.6152933		FALSE	0	GLI1	0	0
1151	3.48826816	0.00638513	0.28667521	0	21	7	FALSE	INO80B	2.23809524	21	0	0	0.68896648		FALSE	0	INO80B	1687792	0.07282913
1153	2.76899441	0.00192456	0.36114193	0.16666667	4	6	FALSE	ACTL6A	530.5	4	0	0	0.7788757		FALSE	0	ACTL6A	562608	0.25628627
1155	4.48798883	0	0.22281695	0	1	8	FALSE	IGFBP2	21	1	0	0	0.5640014		FALSE	0	IGFBP2	0	0
1157	4.48798883	0	0.22281695	0	1	8	FALSE	INO80D	21	1	0	0	0.5640014		FALSE	0	INO80D	0	0
1159	4.48798883	0	0.22281695	0	1	8	FALSE	NFRKB	21	1	0	0	0.5640014		FALSE	0	NFRKB	0	0
1161	4.48798883	0	0.22281695	0	1	8	FALSE	INO80C	21	1	0	0	0.5640014		FALSE	0	INO80C	0	0
1165	2.47597765	0.00724102	0.40388087	0.01904762	22	5	FALSE	IQGAP3	100.5238095	22	0	1	0.81550279		FALSE	0	IQGAP3	281746	0.04895089
1166	3.47039106	5.71E-06	0.28815196	0	2	6	FALSE	CDC42	17	2	0	0	0.69120112		FALSE	0	CDC42	874	0.53333333
1168	3.47569832	0	0.28771197	0	1	6	FALSE	CALM3	21	1	0	0	0.69053771		FALSE	0	CALM3	0	0
1171	3.38379888	6.30E-05	0.29552584	0	2	6	FALSE	MYH2	60.5	2	0	0	0.70202514		FALSE	0	MYH2	2812	0.50423729
1173	3.43044693	4.49E-05	0.29150721	0	2	6	FALSE	LRRK2	50	2	0	0	0.69619413		FALSE	0	LRRK2	4240	0.50515464
1175	3.47569832	0	0.28771197	0	1	6	FALSE	IST1	21	1	0	0	0.69053771		FALSE	0	IST1	0	0
1178	3.6972067	1.32E-06	0.27047446	0	2	7	FALSE	ITGA11	3	2	0	0	0.66284916	mRNAup	FALSE	0	ITGA11	320	0.5
1180	3.56368715	0.01027727	0.28060825	0	25	7	FALSE	ITGAM	1.48	25	0	0	0.67953911	mRNAup	FALSE	0	ITGAM	2050100	0.048
1181	4.56340782	0	0.21913448	0	1	8	FALSE	SHARPIN	25	1	0	0	0.55457402		FALSE	0	SHARPIN	0	0
1183	4.56340782	0	0.21913448	0	1	8	FALSE	THY1	25	1	0	0	0.55457402		FALSE	0	THY1	0	0
1185	4.03631285	1.60E-04	0.24775087	0	2	6	FALSE	ELANE	26.5	2	0	0	0.62046089		FALSE	0	ELANE	40244	0.5
1187	4.56340782	0	0.21913448	0	1	8	FALSE	CD14	25	1	0	0	0.55457402	mRNAup	FALSE	0	CD14	0	0
1189	4.56340782	0	0.21913448	0	1	8	FALSE	C3	25	1	0	0	0.55457402	mRNAup	FALSE	0	C3	0	0
1191	2.8027933	0.00273435	0.35678692	0	2	6	FALSE	BCAP31	997	2	0	0	0.77465084		FALSE	0	BCAP31	547366	0.50050251
1193	4.56340782	0	0.21913448	0	1	8	FALSE	ICAM4	25	1	0	0	0.55457402		FALSE	0	ICAM4	0	0
1195	3.05418994	0.01108497	0.32741906	0	39	5	FALSE	ITPR3	4.33333333	39	0	0	0.74322626	mRNAup	FALSE	0	ITPR3	2075924	0.03968254
1196	2.80027933	6.27E-04	0.35710723	0	3	6	FALSE	FLNA	670.6666667	3	0	0	0.77496508		FALSE	0	FLNA	179756	0.33584086
1198	4.00698324	1.45E-05	0.24956431	0	2	6	FALSE	TRPC7	41	2	0	0	0.62412709		FALSE	0	TRPC7	5160	0.54794521
1201	2.80083799	4.79E-04	0.357036	0	2	6	FALSE	HSP90B1	1004	2	0	0	0.77489525		FALSE	0	HSP90B1	124534	0.50300903
1203	2.78463687	0.00145312	0.35911325	0	4	6	FALSE	PPP1CA	513.5	4	0	0	0.77692039		FALSE	0	PPP1CA	469994	0.25358733
1207	2.76871508	0.00203436	0.36117837	0.16666667	4	6	FALSE	LRPPRC	523.25	4	0	0	0.77891061		FALSE	0	LRPPRC	361038	0.25437956
1209	4.05391061	0	0.24667539	0	1	6	FALSE	TRPC2	39	1	0	0	0.61826117		FALSE	0	TRPC2	0	0
1211	4.02374302	2.36E-05	0.24852482	0	2	6	FALSE	CAPZA2	30	2	0	0	0.62203212		FALSE	0	CAPZA2	2908	0.50877193
1213	4.05391061	0	0.24667539	0	1	6	FALSE	ITPR1	39	1	0	0	0.61826117		FALSE	0	ITPR1	0	0
1217	2.72206704	9.73E-04	0.36736788	0	3	6	FALSE	MYH9	729.6666667	3	0	0	0.78474162		FALSE	0	MYH9	528236	0.34599557
1219	3.0924581	0.00337978	0.32336736	0	13	5	FALSE	KCNA3	7.53846154	13	0	0	0.73844274	mRNAup	FALSE	0	KCNA3	277788	0.08717949
1220	4.09217877	0	0.2443686	0	1	6	FALSE	KCNA2	13	1	0	0	0.61347765		FALSE	0	KCNA2	0	0
1222	3.93128492	2.02E-05	0.25436976	0	2	6	FALSE	KCNA4	56.5	2	0	0	0.63358939	mRNAdown	FALSE	0	KCNA4	2808	0.51869159
1224	4.09217877	0	0.2443686	0	1	6	FALSE	KCNA1	13	1	0	0	0.61347765		FALSE	0	KCNA1	0	0
1227	3.93128492	2.02E-05	0.25436976	0	2	6	FALSE	KCNA5	56.5	2	0	0	0.63358939		FALSE	0	KCNA5	2808	0.51869159
1229	2.80977654	5.06E-04	0.35590019	0	2	6	FALSE	TFRC	991	2	0	0	0.77377793		FALSE	0	TFRC	51004	0.50075873
1231	4.09217877	0	0.2443686	0	1	6	FALSE	CD3D	13	1	0	0	0.61347765	mRNAup	FALSE	0	CD3D	0	0
1233	4.09217877	0	0.2443686	0	1	6	FALSE	IL16	13	1	0	0	0.61347765	mRNAup	FALSE	0	IL16	0	0
1236	4.02067039	1.92E-05	0.24871474	0	2	6	FALSE	BAX	39	2	0	0	0.6224162		FALSE	0	BAX	2050	0.51351351
1238	3.32206704	0.00946831	0.30101741	0	25	6	FALSE	KLHL2	2.04166667	25	0	1	0.70974162		FALSE	0	KLHL2	410150	0.04528986
1239	4.32178771	0	0.23138573	0	1	7	FALSE	ACTC1	24	1	0	0	0.58477654		FALSE	0	ACTC1	0	0
1241	4.32178771	0	0.23138573	0	1	7	FALSE	TXNDC12	24	1	0	0	0.58477654		FALSE	0	TXNDC12	0	0
1243	4.32178771	0	0.23138573	0	1	7	FALSE	ZNF114	24	1	0	0	0.58477654		FALSE	0	ZNF114	0	0
1245	4.32178771	0	0.23138573	0	1	7	FALSE	WNK2	24	1	0	0	0.58477654		FALSE	0	WNK2	0	0
1248	2.80335196	0.00192522	0.35671582	0	2	6	FALSE	TNPO2	996.5	2	0	0	0.77458101		FALSE	0	TNPO2	104998	0.50050277
1250	4.28240223	4.02E-05	0.2335138	0	2	7	FALSE	KEAP1	18.5	2	0	0	0.58969972		FALSE	0	KEAP1	3882	0.5
1252	4.32178771	0	0.23138573	0	1	7	FALSE	KLHL12	24	1	0	0	0.58477654		FALSE	0	KLHL12	0	0
1254	4.32178771	0	0.23138573	0	1	7	FALSE	WNK1	24	1	0	0	0.58477654		FALSE	0	WNK1	0	0
1256	4.32178771	0	0.23138573	0	1	7	FALSE	TMA16	24	1	0	0	0.58477654		FALSE	0	TMA16	0	0
1258	3.07625698	0.00315386	0.32507037	0	8	5	FALSE	WNK3	17.71428571	8	0	1	0.74046788		FALSE	0	WNK3	111660	0.16548798
1260	4.32178771	0	0.23138573	0	1	7	FALSE	CCDC43	24	1	0	0	0.58477654		FALSE	0	CCDC43	0	0
1262	4.32178771	0	0.23138573	0	1	7	FALSE	WNK4	24	1	0	0	0.58477654		FALSE	0	WNK4	0	0
1264	3.08184358	0.00702336	0.3244811	0	20	5	FALSE	LZTFL1	5.6	20	0	0	0.73976955		FALSE	0	LZTFL1	615094	0.06052632
1265	4.08156425	0	0.24500411	0	1	6	FALSE	BBS4	20	1	0	0	0.61480447		FALSE	0	BBS4	0	0
1267	4.08156425	0	0.24500411	0	1	6	FALSE	BBS2	20	1	0	0	0.61480447		FALSE	0	BBS2	0	0
1270	4.08156425	0	0.24500411	0	1	6	FALSE	TTC8	20	1	0	0	0.61480447		FALSE	0	TTC8	0	0
1272	4.08156425	0	0.24500411	0	1	6	FALSE	BBS7	20	1	0	0	0.61480447		FALSE	0	BBS7	0	0
1274	4.08156425	0	0.24500411	0	1	6	FALSE	BBS1	20	1	0	0	0.61480447		FALSE	0	BBS1	0	0
1276	4.08156425	0	0.24500411	0	1	6	FALSE	CEP250	20	1	0	0	0.61480447		FALSE	0	CEP250	0	0
1278	4.08156425	0	0.24500411	0	1	6	FALSE	WDYHV1	20	1	0	0	0.61480447		FALSE	0	WDYHV1	0	0
1280	2.80726257	6.84E-04	0.35621891	0	2	6	FALSE	SH3PXD2B	994.5	2	0	0	0.77409218		FALSE	0	SH3PXD2B	78722	0.50126135
1282	4.08156425	0	0.24500411	0	1	6	FALSE	BBS5	20	1	0	0	0.61480447		FALSE	0	BBS5	0	0
1284	2.80726257	6.84E-04	0.35621891	0	2	6	FALSE	UBXN7	994.5	2	0	0	0.77409218		FALSE	0	UBXN7	78722	0.50126135
1286	4.08156425	0	0.24500411	0	1	6	FALSE	BBS9	20	1	0	0	0.61480447		FALSE	0	BBS9	0	0
1288	2.45977654	0.01667565	0.40654099	0.01493506	57	5	FALSE	MAP2	39.23214286	57	0	1	0.81752793		FALSE	0	MAP2	717914	0.01891424
1289	2.80502793	0	0.35650269	1	2	6	FALSE	PSMD8	1012.5	2	0	0	0.77437151		FALSE	0	PSMD8	0	0.505997
1292	2.80502793	0	0.35650269	1	2	6	FALSE	PSMC5	1012.5	2	0	0	0.77437151		FALSE	0	PSMC5	0	0.505997
1297	2.80502793	0	0.35650269	1	2	6	FALSE	IGF2BP3	1012.5	2	0	0	0.77437151		FALSE	0	IGF2BP3	0	0.505997
1299	2.80502793	0	0.35650269	1	2	6	FALSE	DHX9	1012.5	2	0	0	0.77437151		FALSE	0	DHX9	0	0.505997
1301	2.80502793	0	0.35650269	1	2	6	FALSE	DYNC1I2	1012.5	2	0	0	0.77437151		FALSE	0	DYNC1I2	0	0.505997
1303	2.80502793	0	0.35650269	1	2	6	FALSE	HNRNPA0	1012.5	2	0	0	0.77437151		FALSE	0	HNRNPA0	0	0.505997
1306	2.7972067	4.10E-04	0.3574995	0.33333333	3	6	FALSE	NEDD4	683	3	0	0	0.77534916		FALSE	0	NEDD4	70886	0.33896061
1309	3.45949721	0	0.28905935	0	1	6	FALSE	RPL23A	56	1	0	0	0.69256285		FALSE	0	RPL23A	0	0
1311	2.80502793	0	0.35650269	1	2	6	FALSE	PSMD13	1012.5	2	0	0	0.77437151		FALSE	0	PSMD13	0	0.505997
1313	3.45949721	0	0.28905935	0	1	6	FALSE	APOE	56	1	0	0	0.69256285	mRNAup	FALSE	0	APOE	0	0
1315	3.40335196	0.0110773	0.29382797	0	35	7	FALSE	MEOX1	2.25714286	35	0	0	0.69958101		FALSE	0	MEOX1	4377640	0.040553
1316	4.40307263	0	0.22711413	0	1	8	FALSE	NEIL2	35	1	0	0	0.57461592		FALSE	0	NEIL2	0	0
1318	4.40307263	0	0.22711413	0	1	8	FALSE	CHMP1A	35	1	0	0	0.57461592		FALSE	0	CHMP1A	0	0
1321	4.40307263	0	0.22711413	0	1	8	FALSE	CIB3	35	1	0	0	0.57461592		FALSE	0	CIB3	0	0
1323	3.39078212	2.58E-04	0.29491721	0	2	6	FALSE	MORF4L1	65.5	2	0	0	0.70115223		FALSE	0	MORF4L1	59416	0.5
1325	2.80083799	9.93E-04	0.357036	0	2	6	FALSE	QRICH1	1002	2	0	0	0.77489525		FALSE	0	QRICH1	413776	0.50175439
1327	4.40307263	0	0.22711413	0	1	8	FALSE	UBXN2B	35	1	0	0	0.57461592		FALSE	0	UBXN2B	0	0
1329	2.73072626	0.00238557	0.36620295	0	3	6	FALSE	APPL1	701.3333333	3	0	0	0.78365922		FALSE	0	APPL1	759708	0.33734746
1332	4.40307263	0	0.22711413	0	1	8	FALSE	PAGE3	35	1	0	0	0.57461592		FALSE	0	PAGE3	0	0
1334	4.40307263	0	0.22711413	0	1	8	FALSE	UBE2R2	35	1	0	0	0.57461592		FALSE	0	UBE2R2	0	0
1336	4.40307263	0	0.22711413	0	1	8	FALSE	MAPK9	35	1	0	0	0.57461592		FALSE	0	MAPK9	0	0
1339	4.40307263	0	0.22711413	0	1	8	FALSE	MID1	35	1	0	0	0.57461592		FALSE	0	MID1	0	0
1341	2.79413408	0.00258207	0.35789263	0	3	6	FALSE	CWF19L2	672.3333333	3	0	0	0.77573324		FALSE	0	CWF19L2	647840	0.33466268
1343	4.40307263	0	0.22711413	0	1	8	FALSE	TCEANC	35	1	0	0	0.57461592		FALSE	0	TCEANC	0	0
1345	4.40307263	0	0.22711413	0	1	8	FALSE	A8KAD6	35	1	0	0	0.57461592		FALSE	0	A8KAD6	0	0
1347	3.95614525	2.43E-04	0.25277131	0	3	6	FALSE	TP53RK	61.66666667	3	0	0	0.63048184		FALSE	0	TP53RK	90456	0.35686275
1349	4.40307263	0	0.22711413	0	1	8	FALSE	PAX1	35	1	0	0	0.57461592		FALSE	0	PAX1	0	0
1351	4.40307263	0	0.22711413	0	1	8	FALSE	SYT17	35	1	0	0	0.57461592		FALSE	0	SYT17	0	0
1353	4.40307263	0	0.22711413	0	1	8	FALSE	MEOX2	35	1	0	0	0.57461592		FALSE	0	MEOX2	0	0
1355	2.80083799	9.93E-04	0.357036	0	2	6	FALSE	RANBP3	1002	2	0	0	0.77489525		FALSE	0	RANBP3	413776	0.50175439
1357	2.80083799	9.93E-04	0.357036	0	2	6	FALSE	TXLNA	1002	2	0	0	0.77489525		FALSE	0	TXLNA	413776	0.50175439
1359	3.95614525	2.43E-04	0.25277131	0	3	6	FALSE	NIF3L1	61.66666667	3	0	0	0.63048184		FALSE	0	NIF3L1	90456	0.35686275
1361	4.40307263	0	0.22711413	0	1	8	FALSE	CIAO1	35	1	0	0	0.57461592		FALSE	0	CIAO1	0	0
1363	3.06145251	0.00397845	0.32664234	0	17	5	FALSE	MRPL27	7.35294118	17	0	0	0.74231844		FALSE	0	MRPL27	480402	0.07747489
1365	4.06117318	0	0.24623427	0	1	6	FALSE	FOXB1	17	1	0	0	0.61735335		FALSE	0	FOXB1	0	0
1368	2.79273743	0	0.35807161	1	2	6	FALSE	FEN1	1032.5	2	0	0	0.77590782		FALSE	0	FEN1	0	0.50887137
1374	3.41201117	0	0.29308228	0	1	6	FALSE	CLSPN	96	1	0	0	0.6984986		FALSE	0	CLSPN	0	0
1378	3.41201117	0	0.29308228	0	1	6	FALSE	CHAF1A	96	1	0	0	0.6984986		FALSE	0	CHAF1A	0	0
1380	2.77094972	0.0036837	0.3608871	0.16666667	4	6	FALSE	RAD21	529.5	4	0	0	0.77863128		FALSE	0	RAD21	932520	0.25592646
1382	3.41201117	0	0.29308228	0	1	6	FALSE	ATM	96	1	0	0	0.6984986		FALSE	0	ATM	0	0
1384	2.78743017	1.45E-04	0.35875338	0.33333333	3	6	FALSE	XRCC5	696.3333333	3	0	0	0.77657123		FALSE	0	XRCC5	48214	0.34151129
1386	3.41201117	0	0.29308228	0	1	6	FALSE	AKR7A2	96	1	0	0	0.6984986		FALSE	0	AKR7A2	0	0
1388	2.79273743	0	0.35807161	1	2	6	FALSE	SAMHD1	1032.5	2	0	0	0.77590782		FALSE	0	SAMHD1	0	0.50887137
1390	2.79273743	0	0.35807161	1	2	6	FALSE	HDGF	1032.5	2	0	0	0.77590782		FALSE	0	HDGF	0	0.50887137
1392	3.41201117	0	0.29308228	0	1	6	FALSE	K7EK07	96	1	0	0	0.6984986		FALSE	0	K7EK07	0	0
1394	3.37569832	6.31E-05	0.296235	0	2	6	FALSE	HRAS	85.5	2	0	0	0.70303771		FALSE	0	HRAS	5750	0.51212121
1396	3.4	0	0.29411765	1	2	6	FALSE	ATR	71.5	2	0	0	0.7		FALSE	0	ATR	0	0.52962963
1398	3.38938547	7.13E-05	0.29503873	0	2	6	FALSE	BLM	69.5	2	0	0	0.70132682		FALSE	0	BLM	9418	0.50740741
1402	2.7650838	6.07E-04	0.36165269	0.16666667	4	6	FALSE	SUPT5H	540	4	0	0	0.77936453		FALSE	0	SUPT5H	268594	0.25974964
1404	3.37905028	4.58E-05	0.29594114	0	2	6	FALSE	ESR1	78.5	2	0	0	0.70261872		FALSE	0	ESR1	4994	0.51666667
1406	3.41201117	0	0.29308228	0	1	6	FALSE	BRINP1	96	1	0	0	0.6984986		FALSE	0	BRINP1	0	0
1408	2.79273743	0	0.35807161	1	2	6	FALSE	ANKRD17	1032.5	2	0	0	0.77590782		FALSE	0	ANKRD17	0	0.50887137
1410	3.4	0	0.29411765	1	2	6	FALSE	CHEK1	71.5	2	0	0	0.7		FALSE	0	CHEK1	0	0.52962963
1412	2.78631285	2.44E-04	0.35889724	0.66666667	3	6	FALSE	PCNA	704	3	0	0	0.77671089		FALSE	0	PCNA	87500	0.3432472
1414	2.79273743	0	0.35807161	1	2	6	FALSE	PMS1	1032.5	2	0	0	0.77590782		FALSE	0	PMS1	0	0.50887137
1416	2.79273743	0	0.35807161	1	2	6	FALSE	PRKDC	1032.5	2	0	0	0.77590782		FALSE	0	PRKDC	0	0.50887137
1418	3.41201117	0	0.29308228	0	1	6	FALSE	G3V167	96	1	0	0	0.6984986		FALSE	0	G3V167	0	0
1420	3.30949721	6.04E-05	0.3021607	0	2	6	FALSE	GABARAP	138.5	2	0	0	0.71131285		FALSE	0	GABARAP	16466	0.52083333
1422	2.79273743	0	0.35807161	1	2	6	FALSE	RFC1	1032.5	2	0	0	0.77590782		FALSE	0	RFC1	0	0.50887137
1424	2.77960894	7.83E-04	0.35976284	0.33333333	3	6	FALSE	SUPT16H	699.3333333	3	0	0	0.77754888		FALSE	0	SUPT16H	117756	0.34064327
1426	3.41201117	0	0.29308228	0	1	6	FALSE	MUTYH	96	1	0	0	0.6984986		FALSE	0	MUTYH	0	0
1428	2.79273743	0	0.35807161	1	2	6	FALSE	SMC1A	1032.5	2	0	0	0.77590782		FALSE	0	SMC1A	0	0.50887137
1430	3.37932961	2.61E-04	0.29591668	0	3	6	FALSE	YY1	52.66666667	3	0	0	0.7025838		FALSE	0	YY1	101212	0.34216336
1432	3.41201117	0	0.29308228	0	1	6	FALSE	AIM2	96	1	0	0	0.6984986	mRNAup	FALSE	0	AIM2	0	0
1435	3.41201117	0	0.29308228	0	1	6	FALSE	MCC	96	1	0	0	0.6984986		FALSE	0	MCC	0	0
1437	2.46843575	0.00848908	0.40511486	0.02651515	34	5	FALSE	MTHFD1L	64.45454545	34	0	1	0.81644553		FALSE	0	MTHFD1L	381656	0.03135873
1439	3.32178771	0.00105248	0.30104272	0	3	6	FALSE	ILK	81.33333333	3	0	0	0.70977654		FALSE	0	ILK	188910	0.34330484
1441	3.46815642	0	0.28833763	0	1	6	FALSE	FASTKD3	33	1	0	0	0.69148045		FALSE	0	FASTKD3	0	0
1443	2.81005587	0	0.35586481	1	2	6	FALSE	PSMD6	1001	2	0	0	0.77374302		FALSE	0	PSMD6	0	0.50377453
1446	2.81005587	0	0.35586481	1	2	6	FALSE	XPNPEP1	1001	2	0	0	0.77374302		FALSE	0	XPNPEP1	0	0.50377453
1448	3.46815642	0	0.28833763	0	1	6	FALSE	TSC22D1	33	1	0	0	0.69148045		FALSE	0	TSC22D1	0	0
1450	2.81005587	0	0.35586481	1	2	6	FALSE	PAPOLA	1001	2	0	0	0.77374302		FALSE	0	PAPOLA	0	0.50377453
1452	2.81005587	0	0.35586481	1	2	6	FALSE	NPM1	1001	2	0	0	0.77374302		FALSE	0	NPM1	0	0.50377453
1454	2.68994413	0.00244353	0.37175493	0.10714286	8	6	FALSE	MYC	294.5	8	0	0	0.78875698		FALSE	0	MYC	948978	0.13412409
1456	3.46815642	0	0.28833763	0	1	6	FALSE	PAPOLB	33	1	0	0	0.69148045		FALSE	0	PAPOLB	0	0
1459	3.03631285	0.01357634	0.32934683	0	43	5	FALSE	MX1	4.09302326	43	0	0	0.74546089		FALSE	0	MX1	1865844	0.03726534
1460	3.83882682	5.31E-04	0.26049625	0	4	6	FALSE	SIAH1	69	4	0	0	0.64514665		FALSE	0	SIAH1	65498	0.25757576
1462	4.03603352	0	0.24776801	0	1	6	FALSE	HMGXB4	43	1	0	0	0.62049581		FALSE	0	HMGXB4	0	0
1464	4.03603352	0	0.24776801	0	1	6	FALSE	GMEB1	43	1	0	0	0.62049581		FALSE	0	GMEB1	0	0
1466	4.03603352	0	0.24776801	0	1	6	FALSE	ZNF251	43	1	0	0	0.62049581		FALSE	0	ZNF251	0	0
1468	4.00698324	1.45E-05	0.24956431	0	2	6	FALSE	TRPC4	41	2	0	0	0.62412709		FALSE	0	TRPC4	5160	0.54794521
1470	2.70530726	0.00201374	0.36964378	0.1	5	6	FALSE	TUBA1A	452.4	5	0	0	0.78683659		FALSE	0	TUBA1A	620166	0.21023732
1472	2.79692737	7.98E-04	0.3575352	0	2	6	FALSE	SLC25A3	1006	2	0	0	0.77538408		FALSE	0	SLC25A3	143602	0.501998
1475	4.00363128	8.59E-05	0.24977325	0	2	6	FALSE	CHD3	42	2	0	0	0.62454609		FALSE	0	CHD3	44172	0.50617284
1477	4.01424581	3.17E-05	0.2491128	0	2	6	FALSE	ADRM1	29.5	2	0	0	0.62321927		FALSE	0	ADRM1	2420	0.50892857
1479	2.77793296	0.00152361	0.35997989	0	3	6	FALSE	PLRG1	686.6666667	3	0	0	0.77775838		FALSE	0	PLRG1	283660	0.33627595
1482	4.03603352	0	0.24776801	0	1	6	FALSE	BRD7	43	1	0	0	0.62049581		FALSE	0	BRD7	0	0
1484	4.03603352	0	0.24776801	0	1	6	FALSE	CASP8AP2	43	1	0	0	0.62049581		FALSE	0	CASP8AP2	0	0
1486	4.03603352	0	0.24776801	0	1	6	FALSE	ZNF623	43	1	0	0	0.62049581		FALSE	0	ZNF623	0	0
1489	2.79692737	7.98E-04	0.3575352	0	2	6	FALSE	EPM2AIP1	1006	2	0	0	0.77538408		FALSE	0	EPM2AIP1	143602	0.501998
1491	4.03603352	0	0.24776801	0	1	6	FALSE	PIAS1	43	1	0	0	0.62049581		FALSE	0	PIAS1	0	0
1493	4.00698324	1.45E-05	0.24956431	0	2	6	FALSE	TRPC6	41	2	0	0	0.62412709		FALSE	0	TRPC6	5160	0.54794521
1495	3.96256983	4.06E-05	0.25236148	0	2	6	FALSE	TDG	45	2	0	0	0.62967877		FALSE	0	TDG	4418	0.50574713
1498	4.03603352	0	0.24776801	0	1	6	FALSE	LRRC4B	43	1	0	0	0.62049581		FALSE	0	LRRC4B	0	0
1501	4.00698324	1.45E-05	0.24956431	0	2	6	FALSE	TRPC5	41	2	0	0	0.62412709		FALSE	0	TRPC5	5160	0.54794521
1503	4.00698324	1.45E-05	0.24956431	0	2	6	FALSE	TRPC1	41	2	0	0	0.62412709		FALSE	0	TRPC1	5160	0.54794521
1505	4.03603352	0	0.24776801	0	1	6	FALSE	ZBTB16	43	1	0	0	0.62049581		FALSE	0	ZBTB16	0	0
1508	4.00698324	1.45E-05	0.24956431	0	2	6	FALSE	TRPC3	41	2	0	0	0.62412709		FALSE	0	TRPC3	5160	0.54794521
1510	4.03603352	0	0.24776801	0	1	6	FALSE	ZCCHC12	43	1	0	0	0.62049581		FALSE	0	ZCCHC12	0	0
1513	4.03603352	0	0.24776801	0	1	6	FALSE	CBX4	43	1	0	0	0.62049581		FALSE	0	CBX4	0	0
1515	4.03603352	0	0.24776801	0	1	6	FALSE	CAB39L	43	1	0	0	0.62049581		FALSE	0	CAB39L	0	0
1517	2.78044693	0.0016431	0.35965441	0	3	6	FALSE	RELA	684.3333333	3	0	0	0.77744413		FALSE	0	RELA	637720	0.33645167
1519	2.79692737	7.98E-04	0.3575352	0	2	6	FALSE	KIF26B	1006	2	0	0	0.77538408		FALSE	0	KIF26B	143602	0.501998
1521	4.03603352	0	0.24776801	0	1	6	FALSE	C7orf25	43	1	0	0	0.62049581		FALSE	0	C7orf25	0	0
1523	4.03603352	0	0.24776801	0	1	6	FALSE	KLHL35	43	1	0	0	0.62049581		FALSE	0	KLHL35	0	0
1525	4.03603352	0	0.24776801	0	1	6	FALSE	PSD3	43	1	0	0	0.62049581		FALSE	0	PSD3	0	0
1527	3.09916201	1.01E-04	0.32266787	0	2	5	FALSE	MXRA5	38.5	2	0	0	0.73760475		FALSE	0	MXRA5	15040	0.50675676
1528	4.0472067	4.31E-06	0.24708399	0	2	6	FALSE	EIF1B	35	2	0	0	0.61909916		FALSE	0	EIF1B	208	0.50746269
1531	3.07234637	0.00828681	0.32548413	0	24	5	FALSE	NECAP1	5.25	24	0	0	0.7409567		FALSE	0	NECAP1	755152	0.05448718
1532	4.07206704	0	0.24557552	0	1	6	FALSE	DAB2	24	1	0	0	0.61599162		FALSE	0	DAB2	0	0
1534	4.07206704	0	0.24557552	0	1	6	FALSE	AMPH	24	1	0	0	0.61599162		FALSE	0	AMPH	0	0
1536	2.79748603	0.00118594	0.3574638	0	3	6	FALSE	CLTC	672.3333333	3	0	0	0.77531425		FALSE	0	CLTC	159362	0.33583458
1538	4.07206704	0	0.24557552	0	1	6	FALSE	UFC1	24	1	0	0	0.61599162		FALSE	0	UFC1	0	0
1540	4.07206704	0	0.24557552	0	1	6	FALSE	KIAA0907	24	1	0	0	0.61599162		FALSE	0	KIAA0907	0	0
1542	2.80530726	7.85E-04	0.35646719	0	2	6	FALSE	AP1G1	996.5	2	0	0	0.77433659		FALSE	0	AP1G1	89544	0.50125881
1544	2.80530726	7.85E-04	0.35646719	0	2	6	FALSE	HIP1	996.5	2	0	0	0.77433659		FALSE	0	HIP1	89544	0.50125881
1546	4.07206704	0	0.24557552	0	1	6	FALSE	SNAP91	24	1	0	0	0.61599162	mRNAdown	FALSE	0	SNAP91	0	0
1548	4.07206704	0	0.24557552	0	1	6	FALSE	RAB4B	24	1	0	0	0.61599162		FALSE	0	RAB4B	0	0
1550	2.80530726	7.85E-04	0.35646719	0	2	6	FALSE	PHGDH	996.5	2	0	0	0.77433659		FALSE	0	PHGDH	89544	0.50125881
1552	4.07206704	0	0.24557552	0	1	6	FALSE	PITPNA	24	1	0	0	0.61599162		FALSE	0	PITPNA	0	0
1558	4.07206704	0	0.24557552	0	1	6	FALSE	CARHSP1	24	1	0	0	0.61599162		FALSE	0	CARHSP1	0	0
1560	3.64050279	0.00328525	0.27468733	0	13	7	FALSE	NEU2	1.84615385	13	0	0	0.66993715		FALSE	0	NEU2	509356	0.09401709
1561	4.05698324	4.70E-05	0.24648857	0	2	6	FALSE	PEX5	19.5	2	0	0	0.61787709		FALSE	0	PEX5	15174	0.51388889
1563	4.02234637	1.05E-04	0.24861111	0	2	6	FALSE	KIAA1671	40.5	2	0	0	0.6222067		FALSE	0	KIAA1671	21856	0.5
1565	4.64022346	0	0.21550686	0	1	8	FALSE	TFAP4	13	1	0	0	0.54497207		FALSE	0	TFAP4	0	0
1567	3.87178771	5.00E-04	0.25827862	0	3	6	FALSE	PEX14	73.33333333	3	0	0	0.64102654		FALSE	0	PEX14	84770	0.33643411
1569	4.64022346	0	0.21550686	0	1	8	FALSE	ALKBH3	13	1	0	0	0.54497207		FALSE	0	ALKBH3	0	0
1572	4.64022346	0	0.21550686	0	1	8	FALSE	ZWINT	13	1	0	0	0.54497207		FALSE	0	ZWINT	0	0
1575	4.04441341	1.12E-04	0.24725464	0	3	6	FALSE	NOTCH2NL	16.66666667	3	0	0	0.61944832		FALSE	0	NOTCH2NL	24000	0.35606061
1577	2.80865922	0.00152363	0.35604177	0	2	6	FALSE	NOTCH3	991	2	0	0	0.7739176		FALSE	0	NOTCH3	222048	0.50025265
1579	4.64022346	0	0.21550686	0	1	8	FALSE	NOSIP	13	1	0	0	0.54497207		FALSE	0	NOSIP	0	0
1581	3.09189944	0.00497585	0.32342578	0	15	5	FALSE	NSMCE1	6.46666667	15	0	0	0.73851257		FALSE	0	NSMCE1	275442	0.07387387
1582	4.09162011	0	0.24440197	0	1	6	FALSE	FAM178A	15	1	0	0	0.61354749		FALSE	0	FAM178A	0	0
1585	2.80782123	0.00135957	0.35614803	0	2	6	FALSE	SMC6	992	2	0	0	0.77402235		FALSE	0	SMC6	70538	0.5002524
1588	4.09162011	0	0.24440197	0	1	6	FALSE	MAGEF1	15	1	0	0	0.61354749		FALSE	0	MAGEF1	0	0
1590	4.09162011	0	0.24440197	0	1	6	FALSE	NSMCE2	15	1	0	0	0.61354749		FALSE	0	NSMCE2	0	0
1592	3.88407821	1.07E-04	0.25746134	0	2	6	FALSE	SIMC1	98	2	0	0	0.63949022		FALSE	0	SIMC1	10640	0.50259067
1595	4.09162011	0	0.24440197	0	1	6	FALSE	SMC5	15	1	0	0	0.61354749		FALSE	0	SMC5	0	0
1598	1.81564246	0.79767847	0.55076923	8.10E-05	1981	5	FALSE	NTRK1	1.64093448	1981	0	12	0.89804469		FALSE	0	NTRK1	116842114	0.00146988
1599	2.81536313	0	0.35519397	0	1	6	FALSE	GGH	1969	1	0	0	0.77307961		FALSE	0	GGH	0	0
1601	2.81536313	0	0.35519397	0	1	6	FALSE	EIF4G2	1969	1	0	0	0.77307961		FALSE	0	EIF4G2	0	0
1604	2.81536313	0	0.35519397	0	1	6	FALSE	FLII	1969	1	0	0	0.77307961		FALSE	0	FLII	0	0
1606	2.81536313	0	0.35519397	0	1	6	FALSE	RIOK1	1969	1	0	0	0.77307961		FALSE	0	RIOK1	0	0
1609	2.81536313	0	0.35519397	0	1	6	FALSE	USP11	1969	1	0	0	0.77307961		FALSE	0	USP11	0	0
1611	2.81536313	0	0.35519397	0	1	6	FALSE	RDH11	1969	1	0	0	0.77307961		FALSE	0	RDH11	0	0
1613	2.81536313	0	0.35519397	0	1	6	FALSE	SRSF6	1969	1	0	0	0.77307961		FALSE	0	SRSF6	0	0
1615	2.81536313	0	0.35519397	0	1	6	FALSE	IRGQ	1969	1	0	0	0.77307961		FALSE	0	IRGQ	0	0
1617	2.81536313	0	0.35519397	0	1	6	FALSE	CDK5	1969	1	0	0	0.77307961		FALSE	0	CDK5	0	0
1619	2.81536313	0	0.35519397	0	1	6	FALSE	CCDC124	1969	1	0	0	0.77307961		FALSE	0	CCDC124	0	0
1621	2.81536313	0	0.35519397	0	1	6	FALSE	PSMC6	1969	1	0	0	0.77307961		FALSE	0	PSMC6	0	0
1623	2.81536313	0	0.35519397	0	1	6	FALSE	CAP1	1969	1	0	0	0.77307961		FALSE	0	CAP1	0	0
1625	2.81536313	0	0.35519397	0	1	6	FALSE	EIF4G3	1969	1	0	0	0.77307961		FALSE	0	EIF4G3	0	0
1627	2.81536313	0	0.35519397	0	1	6	FALSE	PFAS	1969	1	0	0	0.77307961		FALSE	0	PFAS	0	0
1629	2.81536313	0	0.35519397	0	1	6	FALSE	SSRP1	1969	1	0	0	0.77307961		FALSE	0	SSRP1	0	0
1631	2.81536313	0	0.35519397	0	1	6	FALSE	RPS2	1969	1	0	0	0.77307961		FALSE	0	RPS2	0	0
1633	2.81284916	0	0.35551142	1	2	6	FALSE	IFT122	991.5	2	0	0	0.77339385		FALSE	0	IFT122	0	0.50151745
1635	2.81536313	0	0.35519397	0	1	6	FALSE	ABCF2	1969	1	0	0	0.77307961		FALSE	0	ABCF2	0	0
1637	2.81536313	0	0.35519397	0	1	6	FALSE	ESYT2	1969	1	0	0	0.77307961		FALSE	0	ESYT2	0	0
1639	2.81536313	0	0.35519397	0	1	6	FALSE	HNRNPUL2	1969	1	0	0	0.77307961		FALSE	0	HNRNPUL2	0	0
1641	2.81536313	0	0.35519397	0	1	6	FALSE	RALY	1969	1	0	0	0.77307961		FALSE	0	RALY	0	0
1643	2.81536313	0	0.35519397	0	1	6	FALSE	PLEKHA6	1969	1	0	0	0.77307961		FALSE	0	PLEKHA6	0	0
1645	2.81536313	0	0.35519397	0	1	6	FALSE	USP10	1969	1	0	0	0.77307961		FALSE	0	USP10	0	0
1647	2.81536313	0	0.35519397	0	1	6	FALSE	YARS	1969	1	0	0	0.77307961		FALSE	0	YARS	0	0
1649	2.81536313	0	0.35519397	0	1	6	FALSE	CCT3	1969	1	0	0	0.77307961		FALSE	0	CCT3	0	0
1651	2.81536313	0	0.35519397	0	1	6	FALSE	RALGAPB	1969	1	0	0	0.77307961		FALSE	0	RALGAPB	0	0
1653	2.73603352	4.02E-04	0.3654926	0	2	6	FALSE	HDAC6	1075	2	0	0	0.78299581		FALSE	0	HDAC6	386604	0.51609803
1655	2.81536313	0	0.35519397	0	1	6	FALSE	SLC25A11	1969	1	0	0	0.77307961		FALSE	0	SLC25A11	0	0
1657	2.81536313	0	0.35519397	0	1	6	FALSE	GTPBP4	1969	1	0	0	0.77307961		FALSE	0	GTPBP4	0	0
1659	2.81536313	0	0.35519397	0	1	6	FALSE	GTPBP1	1969	1	0	0	0.77307961		FALSE	0	GTPBP1	0	0
1661	2.81536313	0	0.35519397	0	1	6	FALSE	AP2A2	1969	1	0	0	0.77307961		FALSE	0	AP2A2	0	0
1663	2.81536313	0	0.35519397	0	1	6	FALSE	ISYNA1	1969	1	0	0	0.77307961		FALSE	0	ISYNA1	0	0
1665	2.81536313	0	0.35519397	0	1	6	FALSE	FAM129B	1969	1	0	0	0.77307961		FALSE	0	FAM129B	0	0
1667	2.78826816	0.00141214	0.35864556	0	2	6	FALSE	YME1L1	1010.5	2	0	0	0.77646648		FALSE	0	YME1L1	219098	0.50198906
1669	2.81536313	0	0.35519397	0	1	6	FALSE	ECHS1	1969	1	0	0	0.77307961		FALSE	0	ECHS1	0	0
1671	2.81005587	1.29E-04	0.35586481	0	2	6	FALSE	EIF3D	996.5	2	0	0	0.77374302		FALSE	0	EIF3D	44222	0.50354072
1673	2.81536313	0	0.35519397	0	1	6	FALSE	L1CAM	1969	1	0	0	0.77307961		FALSE	0	L1CAM	0	0
1675	2.81005587	1.29E-04	0.35586481	0	2	6	FALSE	NAP1L1	996.5	2	0	0	0.77374302		FALSE	0	NAP1L1	44222	0.50354072
1677	2.81536313	0	0.35519397	0	1	6	FALSE	PAFAH1B3	1969	1	0	0	0.77307961		FALSE	0	PAFAH1B3	0	0
1679	2.81536313	0	0.35519397	0	1	6	FALSE	CDK11B	1969	1	0	0	0.77307961		FALSE	0	CDK11B	0	0
1681	2.81536313	0	0.35519397	0	1	6	FALSE	CPSF7	1969	1	0	0	0.77307961		FALSE	0	CPSF7	0	0
1683	2.81536313	0	0.35519397	0	1	6	FALSE	MARCKSL1	1969	1	0	0	0.77307961		FALSE	0	MARCKSL1	0	0
1685	2.81536313	0	0.35519397	0	1	6	FALSE	DPYSL2	1969	1	0	0	0.77307961		FALSE	0	DPYSL2	0	0
1687	2.81536313	0	0.35519397	0	1	6	FALSE	EIF5B	1969	1	0	0	0.77307961		FALSE	0	EIF5B	0	0
1689	2.81536313	0	0.35519397	0	1	6	FALSE	RRM2	1969	1	0	0	0.77307961		FALSE	0	RRM2	0	0
1691	2.81536313	0	0.35519397	0	1	6	FALSE	INTS4	1969	1	0	0	0.77307961		FALSE	0	INTS4	0	0
1693	2.80810056	4.42E-04	0.3561126	0	2	6	FALSE	CAPZB	995	2	0	0	0.77398743		FALSE	0	CAPZB	63716	0.50176678
1695	2.81536313	0	0.35519397	0	1	6	FALSE	EIF2S3	1969	1	0	0	0.77307961		FALSE	0	EIF2S3	0	0
1697	2.81536313	0	0.35519397	0	1	6	FALSE	NASP	1969	1	0	0	0.77307961		FALSE	0	NASP	0	0
1699	2.81536313	0	0.35519397	0	1	6	FALSE	RPL29	1969	1	0	0	0.77307961		FALSE	0	RPL29	0	0
1701	2.81536313	0	0.35519397	0	1	6	FALSE	RPL19	1969	1	0	0	0.77307961		FALSE	0	RPL19	0	0
1703	2.81536313	0	0.35519397	0	1	6	FALSE	AGK	1969	1	0	0	0.77307961		FALSE	0	AGK	0	0
1705	2.81536313	0	0.35519397	0	1	6	FALSE	ZC3H11A	1969	1	0	0	0.77307961		FALSE	0	ZC3H11A	0	0
1707	2.81536313	0	0.35519397	0	1	6	FALSE	PDCD11	1969	1	0	0	0.77307961		FALSE	0	PDCD11	0	0
1709	2.8103352	2.86E-04	0.35582944	0	2	6	FALSE	RPS8	993	2	0	0	0.7737081		FALSE	0	RPS8	41126	0.50177036
1711	2.81536313	0	0.35519397	0	1	6	FALSE	XPO4	1969	1	0	0	0.77307961		FALSE	0	XPO4	0	0
1713	2.81536313	0	0.35519397	0	1	6	FALSE	GET4	1969	1	0	0	0.77307961		FALSE	0	GET4	0	0
1715	2.78854749	0.0016845	0.35860964	0	3	6	FALSE	SRM	681.3333333	3	0	0	0.77643156		FALSE	0	SRM	355676	0.33796986
1717	2.81536313	0	0.35519397	0	1	6	FALSE	SEC16A	1969	1	0	0	0.77307961		FALSE	0	SEC16A	0	0
1719	2.81536313	0	0.35519397	0	1	6	FALSE	RBM15B	1969	1	0	0	0.77307961		FALSE	0	RBM15B	0	0
1721	2.81536313	0	0.35519397	0	1	6	FALSE	CEBPZ	1969	1	0	0	0.77307961		FALSE	0	CEBPZ	0	0
1723	2.79273743	0	0.35807161	1	2	6	FALSE	RAD50	1032.5	2	0	0	0.77590782		FALSE	0	RAD50	0	0.50887137
1725	2.73603352	4.02E-04	0.3654926	0	2	6	FALSE	PGK1	1075	2	0	0	0.78299581		FALSE	0	PGK1	386604	0.51609803
1727	2.81536313	0	0.35519397	0	1	6	FALSE	MRPL15	1969	1	0	0	0.77307961		FALSE	0	MRPL15	0	0
1729	2.81536313	0	0.35519397	0	1	6	FALSE	ACACA	1969	1	0	0	0.77307961		FALSE	0	ACACA	0	0
1731	2.81536313	0	0.35519397	0	1	6	FALSE	ACO2	1969	1	0	0	0.77307961		FALSE	0	ACO2	0	0
1733	2.74804469	0.00140395	0.3638951	0.33333333	4	6	FALSE	INSR	547	4	0	0	0.78149441		FALSE	0	INSR	465418	0.25949217
1735	2.81536313	0	0.35519397	0	1	6	FALSE	ESYT1	1969	1	0	0	0.77307961		FALSE	0	ESYT1	0	0
1737	2.81536313	0	0.35519397	0	1	6	FALSE	GLDC	1969	1	0	0	0.77307961		FALSE	0	GLDC	0	0
1739	2.81536313	0	0.35519397	0	1	6	FALSE	RPS9	1969	1	0	0	0.77307961		FALSE	0	RPS9	0	0
1741	2.81536313	0	0.35519397	0	1	6	FALSE	CAMSAP1	1969	1	0	0	0.77307961		FALSE	0	CAMSAP1	0	0
1743	2.81536313	0	0.35519397	0	1	6	FALSE	IRF2BP2	1969	1	0	0	0.77307961		FALSE	0	IRF2BP2	0	0
1745	2.81536313	0	0.35519397	0	1	6	FALSE	ORC3	1969	1	0	0	0.77307961		FALSE	0	ORC3	0	0
1747	2.81536313	0	0.35519397	0	1	6	FALSE	ZYG11B	1969	1	0	0	0.77307961		FALSE	0	ZYG11B	0	0
1750	2.81536313	0	0.35519397	0	1	6	FALSE	TBC1D10B	1969	1	0	0	0.77307961		FALSE	0	TBC1D10B	0	0
1752	2.81536313	0	0.35519397	0	1	6	FALSE	KIF13B	1969	1	0	0	0.77307961		FALSE	0	KIF13B	0	0
1754	2.81536313	0	0.35519397	0	1	6	FALSE	MCM6	1969	1	0	0	0.77307961		FALSE	0	MCM6	0	0
1757	2.81536313	0	0.35519397	0	1	6	FALSE	GARS	1969	1	0	0	0.77307961		FALSE	0	GARS	0	0
1759	2.7273743	0.00170676	0.36665301	0	3	6	FALSE	RUVBL1	723.6666667	3	0	0	0.78407821		FALSE	0	RUVBL1	720028	0.3446193
1761	2.81536313	0	0.35519397	0	1	6	FALSE	TLK2	1969	1	0	0	0.77307961		FALSE	0	TLK2	0	0
1763	2.81536313	0	0.35519397	0	1	6	FALSE	RAP1A	1969	1	0	0	0.77307961		FALSE	0	RAP1A	0	0
1765	2.81536313	0	0.35519397	0	1	6	FALSE	GTF2F1	1969	1	0	0	0.77307961		FALSE	0	GTF2F1	0	0
1768	2.81536313	0	0.35519397	0	1	6	FALSE	VPS35	1969	1	0	0	0.77307961		FALSE	0	VPS35	0	0
1770	2.81536313	0	0.35519397	0	1	6	FALSE	PABPC4	1969	1	0	0	0.77307961		FALSE	0	PABPC4	0	0
1772	2.80307263	6.44E-04	0.35675137	0	2	6	FALSE	FBL	998.5	2	0	0	0.77461592		FALSE	0	FBL	91318	0.50176056
1774	2.81536313	0	0.35519397	0	1	6	FALSE	SRPR	1969	1	0	0	0.77307961		FALSE	0	SRPR	0	0
1776	2.81536313	0	0.35519397	0	1	6	FALSE	RPL15	1969	1	0	0	0.77307961		FALSE	0	RPL15	0	0
1778	2.81536313	0	0.35519397	0	1	6	FALSE	OAT	1969	1	0	0	0.77307961		FALSE	0	OAT	0	0
1780	2.81536313	0	0.35519397	0	1	6	FALSE	ZC3HAV1	1969	1	0	0	0.77307961		FALSE	0	ZC3HAV1	0	0
1782	2.81536313	0	0.35519397	0	1	6	FALSE	UBE4A	1969	1	0	0	0.77307961		FALSE	0	UBE4A	0	0
1784	2.79022346	0.00332791	0.35839423	0	4	6	FALSE	HNRNPA1	508.25	4	0	0	0.77622207		FALSE	0	HNRNPA1	428062	0.25211233
1786	2.81536313	0	0.35519397	0	1	6	FALSE	RPS6KA3	1969	1	0	0	0.77307961		FALSE	0	RPS6KA3	0	0
1788	2.80558659	5.54E-04	0.3564317	0	2	6	FALSE	PAK2	996.5	2	0	0	0.77430168		FALSE	0	PAK2	80150	0.50125881
1790	2.81536313	0	0.35519397	0	1	6	FALSE	PPFIA1	1969	1	0	0	0.77307961		FALSE	0	PPFIA1	0	0
1792	2.81536313	0	0.35519397	0	1	6	FALSE	COPB1	1969	1	0	0	0.77307961		FALSE	0	COPB1	0	0
1794	2.81536313	0	0.35519397	0	1	6	FALSE	PUF60	1969	1	0	0	0.77307961		FALSE	0	PUF60	0	0
1796	2.81536313	0	0.35519397	0	1	6	FALSE	KIF1A	1969	1	0	0	0.77307961		FALSE	0	KIF1A	0	0
1798	2.81536313	0	0.35519397	0	1	6	FALSE	RPS13	1969	1	0	0	0.77307961		FALSE	0	RPS13	0	0
1800	2.81536313	0	0.35519397	0	1	6	FALSE	RPL14	1969	1	0	0	0.77307961		FALSE	0	RPL14	0	0
1802	2.81536313	0	0.35519397	0	1	6	FALSE	ARFGEF1	1969	1	0	0	0.77307961		FALSE	0	ARFGEF1	0	0
1804	2.81536313	0	0.35519397	0	1	6	FALSE	GNPAT	1969	1	0	0	0.77307961		FALSE	0	GNPAT	0	0
1806	2.71424581	0.00190006	0.36842647	0	4	6	FALSE	TUBB	551.5	4	0	0	0.78571927		FALSE	0	TUBB	602292	0.25954738
1808	2.81536313	0	0.35519397	0	1	6	FALSE	NAMPT	1969	1	0	0	0.77307961	mRNAup	FALSE	0	NAMPT	0	0
1810	2.81536313	0	0.35519397	0	1	6	FALSE	BLVRA	1969	1	0	0	0.77307961		FALSE	0	BLVRA	0	0
1812	2.81536313	0	0.35519397	0	1	6	FALSE	SEC31A	1969	1	0	0	0.77307961		FALSE	0	SEC31A	0	0
1814	2.81536313	0	0.35519397	0	1	6	FALSE	LIG1	1969	1	0	0	0.77307961		FALSE	0	LIG1	0	0
1816	2.81536313	0	0.35519397	0	1	6	FALSE	IGF1R	1969	1	0	0	0.77307961		FALSE	0	IGF1R	0	0
1818	2.81536313	0	0.35519397	0	1	6	FALSE	PARP1	1969	1	0	0	0.77307961		FALSE	0	PARP1	0	0
1820	2.81536313	0	0.35519397	0	1	6	FALSE	SCAMP3	1969	1	0	0	0.77307961		FALSE	0	SCAMP3	0	0
1822	2.81536313	0	0.35519397	0	1	6	FALSE	LARP7	1969	1	0	0	0.77307961		FALSE	0	LARP7	0	0
1824	2.81536313	0	0.35519397	0	1	6	FALSE	GYS1	1969	1	0	0	0.77307961		FALSE	0	GYS1	0	0
1826	2.81536313	0	0.35519397	0	1	6	FALSE	RPS5	1969	1	0	0	0.77307961		FALSE	0	RPS5	0	0
1828	2.81536313	0	0.35519397	0	1	6	FALSE	COG2	1969	1	0	0	0.77307961		FALSE	0	COG2	0	0
1830	2.81536313	0	0.35519397	0	1	6	FALSE	SRSF7	1969	1	0	0	0.77307961		FALSE	0	SRSF7	0	0
1832	2.81536313	0	0.35519397	0	1	6	FALSE	GCN1L1	1969	1	0	0	0.77307961		FALSE	0	GCN1L1	0	0
1834	2.76201117	0.00136331	0.36205502	0	2	6	FALSE	TMEM132A	1039	2	0	0	0.7797486		FALSE	0	TMEM132A	448854	0.50437318
1836	2.81536313	0	0.35519397	0	1	6	FALSE	UBAP2L	1969	1	0	0	0.77307961		FALSE	0	UBAP2L	0	0
1838	2.81536313	0	0.35519397	0	1	6	FALSE	MYCN	1969	1	0	0	0.77307961		FALSE	0	MYCN	0	0
1840	2.81536313	0	0.35519397	0	1	6	FALSE	BAG6	1969	1	0	0	0.77307961		FALSE	0	BAG6	0	0
1842	2.81536313	0	0.35519397	0	1	6	FALSE	ATL1	1969	1	0	0	0.77307961		FALSE	0	ATL1	0	0
1844	2.81536313	0	0.35519397	0	1	6	FALSE	FHOD1	1969	1	0	0	0.77307961		FALSE	0	FHOD1	0	0
1846	2.81284916	0	0.35551142	1	2	6	FALSE	ALYREF	991.5	2	0	0	0.77339385		FALSE	0	ALYREF	0	0.50151745
1848	2.81536313	0	0.35519397	0	1	6	FALSE	GAPVD1	1969	1	0	0	0.77307961		FALSE	0	GAPVD1	0	0
1850	2.81536313	0	0.35519397	0	1	6	FALSE	AGAP3	1969	1	0	0	0.77307961		FALSE	0	AGAP3	0	0
1852	2.81536313	0	0.35519397	0	1	6	FALSE	CHTF18	1969	1	0	0	0.77307961		FALSE	0	CHTF18	0	0
1854	2.81536313	0	0.35519397	0	1	6	FALSE	SMARCA4	1969	1	0	0	0.77307961		FALSE	0	SMARCA4	0	0
1856	2.81536313	0	0.35519397	0	1	6	FALSE	RAB11A	1969	1	0	0	0.77307961		FALSE	0	RAB11A	0	0
1858	2.73603352	4.02E-04	0.3654926	0	2	6	FALSE	CDK13	1075	2	0	0	0.78299581		FALSE	0	CDK13	386604	0.51609803
1860	2.81536313	0	0.35519397	0	1	6	FALSE	CPSF3	1969	1	0	0	0.77307961		FALSE	0	CPSF3	0	0
1862	2.81536313	0	0.35519397	0	1	6	FALSE	LTF	1969	1	0	0	0.77307961		FALSE	0	LTF	0	0
1864	2.81536313	0	0.35519397	0	1	6	FALSE	RABGEF1	1969	1	0	0	0.77307961		FALSE	0	RABGEF1	0	0
1866	2.81536313	0	0.35519397	0	1	6	FALSE	CHERP	1969	1	0	0	0.77307961		FALSE	0	CHERP	0	0
1868	2.81536313	0	0.35519397	0	1	6	FALSE	ACAT1	1969	1	0	0	0.77307961		FALSE	0	ACAT1	0	0
1870	2.81536313	0	0.35519397	0	1	6	FALSE	UBE4B	1969	1	0	0	0.77307961		FALSE	0	UBE4B	0	0
1872	2.81340782	8.45E-05	0.35544083	0	2	6	FALSE	EXOSC10	988.5	2	0	0	0.77332402		FALSE	0	EXOSC10	14568	0.50101471
1874	2.81536313	0	0.35519397	0	1	6	FALSE	U2SURP	1969	1	0	0	0.77307961		FALSE	0	U2SURP	0	0
1876	2.81145251	3.72E-04	0.35568803	0	2	6	FALSE	CLIC4	991	2	0	0	0.77356844		FALSE	0	CLIC4	163572	0.50151976
1878	2.81536313	0	0.35519397	0	1	6	FALSE	IPO8	1969	1	0	0	0.77307961		FALSE	0	IPO8	0	0
1880	2.81536313	0	0.35519397	0	1	6	FALSE	COPB2	1969	1	0	0	0.77307961		FALSE	0	COPB2	0	0
1882	2.81536313	0	0.35519397	0	1	6	FALSE	MRPS22	1969	1	0	0	0.77307961		FALSE	0	MRPS22	0	0
1884	2.81536313	0	0.35519397	0	1	6	FALSE	PHLDB1	1969	1	0	0	0.77307961		FALSE	0	PHLDB1	0	0
1886	2.81536313	0	0.35519397	0	1	6	FALSE	MED1	1969	1	0	0	0.77307961		FALSE	0	MED1	0	0
1888	2.81536313	0	0.35519397	0	1	6	FALSE	PSME2	1969	1	0	0	0.77307961		FALSE	0	PSME2	0	0
1890	2.81536313	0	0.35519397	0	1	6	FALSE	KIF2C	1969	1	0	0	0.77307961		FALSE	0	KIF2C	0	0
1892	2.81536313	0	0.35519397	0	1	6	FALSE	LRRC49	1969	1	0	0	0.77307961		FALSE	0	LRRC49	0	0
1895	2.81536313	0	0.35519397	0	1	6	FALSE	ZKSCAN1	1969	1	0	0	0.77307961		FALSE	0	ZKSCAN1	0	0
1897	2.81536313	0	0.35519397	0	1	6	FALSE	PLD3	1969	1	0	0	0.77307961		FALSE	0	PLD3	0	0
1899	2.81536313	0	0.35519397	0	1	6	FALSE	UQCRC1	1969	1	0	0	0.77307961		FALSE	0	UQCRC1	0	0
1901	2.81536313	0	0.35519397	0	1	6	FALSE	RRP12	1969	1	0	0	0.77307961		FALSE	0	RRP12	0	0
1903	2.8103352	2.86E-04	0.35582944	0	2	6	FALSE	MRPL37	993	2	0	0	0.7737081		FALSE	0	MRPL37	41126	0.50177036
1905	2.78687151	5.18E-04	0.3588253	0	2	6	FALSE	DPYSL4	1024	2	0	0	0.77664106		FALSE	0	DPYSL4	236884	0.50643564
1907	2.81536313	0	0.35519397	0	1	6	FALSE	VPS18	1969	1	0	0	0.77307961		FALSE	0	VPS18	0	0
1909	2.81536313	0	0.35519397	0	1	6	FALSE	USP48	1969	1	0	0	0.77307961		FALSE	0	USP48	0	0
1911	2.81536313	0	0.35519397	0	1	6	FALSE	CCDC132	1969	1	0	0	0.77307961		FALSE	0	CCDC132	0	0
1913	2.81536313	0	0.35519397	0	1	6	FALSE	UBTF	1969	1	0	0	0.77307961		FALSE	0	UBTF	0	0
1915	2.81536313	0	0.35519397	0	1	6	FALSE	ERCC6L	1969	1	0	0	0.77307961		FALSE	0	ERCC6L	0	0
1917	2.81536313	0	0.35519397	0	1	6	FALSE	PPP6R2	1969	1	0	0	0.77307961		FALSE	0	PPP6R2	0	0
1919	2.81536313	0	0.35519397	0	1	6	FALSE	ABI2	1969	1	0	0	0.77307961		FALSE	0	ABI2	0	0
1921	2.81536313	0	0.35519397	0	1	6	FALSE	RFC3	1969	1	0	0	0.77307961		FALSE	0	RFC3	0	0
1923	2.81536313	0	0.35519397	0	1	6	FALSE	RFC4	1969	1	0	0	0.77307961		FALSE	0	RFC4	0	0
1925	2.81536313	0	0.35519397	0	1	6	FALSE	TRIO	1969	1	0	0	0.77307961		FALSE	0	TRIO	0	0
1927	2.78687151	0.00150153	0.3588253	0	3	6	FALSE	ACAD9	676.3333333	3	0	0	0.77664106		FALSE	0	ACAD9	234194	0.33548601
1930	2.81536313	0	0.35519397	0	1	6	FALSE	RNPEP	1969	1	0	0	0.77307961		FALSE	0	RNPEP	0	0
1932	2.81536313	0	0.35519397	0	1	6	FALSE	HADH	1969	1	0	0	0.77307961		FALSE	0	HADH	0	0
1934	2.81536313	0	0.35519397	0	1	6	FALSE	TRMT6	1969	1	0	0	0.77307961		FALSE	0	TRMT6	0	0
1936	2.81536313	0	0.35519397	0	1	6	FALSE	LONP1	1969	1	0	0	0.77307961		FALSE	0	LONP1	0	0
1938	2.81536313	0	0.35519397	0	1	6	FALSE	AP1B1	1969	1	0	0	0.77307961		FALSE	0	AP1B1	0	0
1940	2.81536313	0	0.35519397	0	1	6	FALSE	TEX10	1969	1	0	0	0.77307961		FALSE	0	TEX10	0	0
1942	2.81536313	0	0.35519397	0	1	6	FALSE	GPD2	1969	1	0	0	0.77307961		FALSE	0	GPD2	0	0
1944	2.79273743	4.10E-04	0.35807161	0	2	6	FALSE	TJP1	1018.5	2	0	0	0.77590782		FALSE	0	TJP1	205482	0.50647088
1946	2.81536313	0	0.35519397	0	1	6	FALSE	ASCC2	1969	1	0	0	0.77307961		FALSE	0	ASCC2	0	0
1948	2.81536313	0	0.35519397	0	1	6	FALSE	LMNB2	1969	1	0	0	0.77307961		FALSE	0	LMNB2	0	0
1950	2.79189944	5.27E-05	0.35817909	0.66666667	3	6	FALSE	ABCF1	695.3333333	3	0	0	0.77601257		FALSE	0	ABCF1	3392	0.34068267
1952	2.81536313	0	0.35519397	0	1	6	FALSE	HSD17B11	1969	1	0	0	0.77307961		FALSE	0	HSD17B11	0	0
1954	2.73603352	4.02E-04	0.3654926	0	2	6	FALSE	EEF1A1	1075	2	0	0	0.78299581		FALSE	0	EEF1A1	386604	0.51609803
1956	2.81536313	0	0.35519397	0	1	6	FALSE	OCRL	1969	1	0	0	0.77307961		FALSE	0	OCRL	0	0
1958	2.81536313	0	0.35519397	0	1	6	FALSE	PAF1	1969	1	0	0	0.77307961		FALSE	0	PAF1	0	0
1960	2.81536313	0	0.35519397	0	1	6	FALSE	DCD	1969	1	0	0	0.77307961		FALSE	0	DCD	0	0
1962	2.81536313	0	0.35519397	0	1	6	FALSE	RNF20	1969	1	0	0	0.77307961		FALSE	0	RNF20	0	0
1964	2.81536313	0	0.35519397	0	1	6	FALSE	LSG1	1969	1	0	0	0.77307961		FALSE	0	LSG1	0	0
1966	2.81536313	0	0.35519397	0	1	6	FALSE	RANBP9	1969	1	0	0	0.77307961		FALSE	0	RANBP9	0	0
1968	2.81536313	0	0.35519397	0	1	6	FALSE	RINT1	1969	1	0	0	0.77307961		FALSE	0	RINT1	0	0
1970	2.79636872	6.59E-04	0.35760663	0	2	6	FALSE	DDX39B	1008.5	2	0	0	0.77545391		FALSE	0	DDX39B	135102	0.50249377
1972	2.81536313	0	0.35519397	0	1	6	FALSE	CLPX	1969	1	0	0	0.77307961		FALSE	0	CLPX	0	0
1974	2.81536313	0	0.35519397	0	1	6	FALSE	BSG	1969	1	0	0	0.77307961		FALSE	0	BSG	0	0
1976	2.81536313	0	0.35519397	0	1	6	FALSE	NUP107	1969	1	0	0	0.77307961		FALSE	0	NUP107	0	0
1978	2.81536313	0	0.35519397	0	1	6	FALSE	EIF3B	1969	1	0	0	0.77307961		FALSE	0	EIF3B	0	0
1980	2.81536313	0	0.35519397	0	1	6	FALSE	HNRNPM	1969	1	0	0	0.77307961		FALSE	0	HNRNPM	0	0
1982	2.81536313	0	0.35519397	0	1	6	FALSE	TTK	1969	1	0	0	0.77307961		FALSE	0	TTK	0	0
1984	2.81536313	0	0.35519397	0	1	6	FALSE	EEF2	1969	1	0	0	0.77307961		FALSE	0	EEF2	0	0
1986	2.81536313	0	0.35519397	0	1	6	FALSE	TRAPPC12	1969	1	0	0	0.77307961		FALSE	0	TRAPPC12	0	0
1988	2.81536313	0	0.35519397	0	1	6	FALSE	USP39	1969	1	0	0	0.77307961		FALSE	0	USP39	0	0
1990	2.81536313	0	0.35519397	0	1	6	FALSE	EHHADH	1969	1	0	0	0.77307961		FALSE	0	EHHADH	0	0
1992	2.81536313	0	0.35519397	0	1	6	FALSE	TOM1	1969	1	0	0	0.77307961		FALSE	0	TOM1	0	0
1995	2.80391061	4.65E-04	0.35664475	0	2	6	FALSE	ANXA11	1001	2	0	0	0.77451117		FALSE	0	ANXA11	103218	0.50301811
1997	2.81536313	0	0.35519397	0	1	6	FALSE	INA	1969	1	0	0	0.77307961		FALSE	0	INA	0	0
1999	2.81536313	0	0.35519397	0	1	6	FALSE	PSMD7	1969	1	0	0	0.77307961		FALSE	0	PSMD7	0	0
2001	2.81536313	0	0.35519397	0	1	6	FALSE	FARSB	1969	1	0	0	0.77307961		FALSE	0	FARSB	0	0
2003	2.81536313	0	0.35519397	0	1	6	FALSE	SRRM1	1969	1	0	0	0.77307961		FALSE	0	SRRM1	0	0
2005	2.81005587	1.29E-04	0.35586481	0	2	6	FALSE	NCL	996.5	2	0	0	0.77374302		FALSE	0	NCL	44222	0.50354072
2007	2.81536313	0	0.35519397	0	1	6	FALSE	ULK1	1969	1	0	0	0.77307961		FALSE	0	ULK1	0	0
2010	2.81536313	0	0.35519397	0	1	6	FALSE	SMARCA1	1969	1	0	0	0.77307961		FALSE	0	SMARCA1	0	0
2012	2.81536313	0	0.35519397	0	1	6	FALSE	PPWD1	1969	1	0	0	0.77307961		FALSE	0	PPWD1	0	0
2014	2.81536313	0	0.35519397	0	1	6	FALSE	XPO7	1969	1	0	0	0.77307961		FALSE	0	XPO7	0	0
2016	2.81536313	0	0.35519397	0	1	6	FALSE	PI4KA	1969	1	0	0	0.77307961		FALSE	0	PI4KA	0	0
2019	2.81536313	0	0.35519397	0	1	6	FALSE	RBM42	1969	1	0	0	0.77307961		FALSE	0	RBM42	0	0
2021	2.81536313	0	0.35519397	0	1	6	FALSE	HIST1H1B	1969	1	0	0	0.77307961		FALSE	0	HIST1H1B	0	0
2024	2.76201117	0.00136331	0.36205502	0	2	6	FALSE	PSMD11	1039	2	0	0	0.7797486		FALSE	0	PSMD11	448854	0.50437318
2026	2.81536313	0	0.35519397	0	1	6	FALSE	RNF214	1969	1	0	0	0.77307961		FALSE	0	RNF214	0	0
2028	2.81536313	0	0.35519397	0	1	6	FALSE	IDH3B	1969	1	0	0	0.77307961		FALSE	0	IDH3B	0	0
2030	2.81536313	0	0.35519397	0	1	6	FALSE	EXOC8	1969	1	0	0	0.77307961		FALSE	0	EXOC8	0	0
2032	2.81536313	0	0.35519397	0	1	6	FALSE	HNRNPUL1	1969	1	0	0	0.77307961		FALSE	0	HNRNPUL1	0	0
2034	2.81536313	0	0.35519397	0	1	6	FALSE	MTCH2	1969	1	0	0	0.77307961		FALSE	0	MTCH2	0	0
2036	2.80223464	0	0.35685805	1	2	6	FALSE	HIST2H4A	1015	2	0	0	0.77472067		FALSE	0	HIST2H4A	0	0.50522648
2038	2.81536313	0	0.35519397	0	1	6	FALSE	EIF5	1969	1	0	0	0.77307961		FALSE	0	EIF5	0	0
2040	2.81536313	0	0.35519397	0	1	6	FALSE	MCM2	1969	1	0	0	0.77307961		FALSE	0	MCM2	0	0
2042	2.81536313	0	0.35519397	0	1	6	FALSE	EIF3I	1969	1	0	0	0.77307961		FALSE	0	EIF3I	0	0
2044	2.79273743	4.10E-04	0.35807161	0	2	6	FALSE	MCM3	1018.5	2	0	0	0.77590782		FALSE	0	MCM3	205482	0.50647088
2046	2.81536313	0	0.35519397	0	1	6	FALSE	ATG2B	1969	1	0	0	0.77307961		FALSE	0	ATG2B	0	0
2048	2.81536313	0	0.35519397	0	1	6	FALSE	MCMBP	1969	1	0	0	0.77307961		FALSE	0	MCMBP	0	0
2050	2.81536313	0	0.35519397	0	1	6	FALSE	PRPF6	1969	1	0	0	0.77307961		FALSE	0	PRPF6	0	0
2052	2.81536313	0	0.35519397	0	1	6	FALSE	WDR6	1969	1	0	0	0.77307961		FALSE	0	WDR6	0	0
2054	2.81536313	0	0.35519397	0	1	6	FALSE	RECQL	1969	1	0	0	0.77307961		FALSE	0	RECQL	0	0
2056	2.81536313	0	0.35519397	0	1	6	FALSE	ZC3H18	1969	1	0	0	0.77307961		FALSE	0	ZC3H18	0	0
2058	2.81536313	0	0.35519397	0	1	6	FALSE	DDX5	1969	1	0	0	0.77307961		FALSE	0	DDX5	0	0
2061	2.81536313	0	0.35519397	0	1	6	FALSE	KIF5C	1969	1	0	0	0.77307961	mRNAdown	FALSE	0	KIF5C	0	0
2063	2.81005587	1.29E-04	0.35586481	0	2	6	FALSE	LEO1	996.5	2	0	0	0.77374302		FALSE	0	LEO1	44222	0.50354072
2065	2.81536313	0	0.35519397	0	1	6	FALSE	LUC7L3	1969	1	0	0	0.77307961		FALSE	0	LUC7L3	0	0
2068	2.81536313	0	0.35519397	0	1	6	FALSE	MAP1B	1969	1	0	0	0.77307961		FALSE	0	MAP1B	0	0
2070	2.74497207	0.00109806	0.36430243	0	2	6	FALSE	TSC2	1034.5	2	0	0	0.78187849		FALSE	0	TSC2	299696	0.50439239
2072	2.81536313	0	0.35519397	0	1	6	FALSE	NAT10	1969	1	0	0	0.77307961		FALSE	0	NAT10	0	0
2074	2.81536313	0	0.35519397	0	1	6	FALSE	SBF2	1969	1	0	0	0.77307961		FALSE	0	SBF2	0	0
2076	2.81536313	0	0.35519397	0	1	6	FALSE	GTF3C5	1969	1	0	0	0.77307961		FALSE	0	GTF3C5	0	0
2078	2.81536313	0	0.35519397	0	1	6	FALSE	NBAS	1969	1	0	0	0.77307961		FALSE	0	NBAS	0	0
2081	2.81536313	0	0.35519397	0	1	6	FALSE	KLHL22	1969	1	0	0	0.77307961		FALSE	0	KLHL22	0	0
2084	2.81536313	0	0.35519397	0	1	6	FALSE	NGFR	1969	1	0	0	0.77307961		FALSE	0	NGFR	0	0
2086	2.79162011	3.79E-04	0.35821493	0	2	6	FALSE	GRPEL1	1020	2	0	0	0.77604749		FALSE	0	GRPEL1	201164	0.50696517
2088	2.81536313	0	0.35519397	0	1	6	FALSE	NCBP1	1969	1	0	0	0.77307961		FALSE	0	NCBP1	0	0
2090	2.81536313	0	0.35519397	0	1	6	FALSE	SLC25A22	1969	1	0	0	0.77307961		FALSE	0	SLC25A22	0	0
2093	2.81536313	0	0.35519397	0	1	6	FALSE	SMPD4	1969	1	0	0	0.77307961		FALSE	0	SMPD4	0	0
2095	2.81536313	0	0.35519397	0	1	6	FALSE	SEC24B	1969	1	0	0	0.77307961		FALSE	0	SEC24B	0	0
2098	2.81536313	0	0.35519397	0	1	6	FALSE	HNRNPF	1969	1	0	0	0.77307961		FALSE	0	HNRNPF	0	0
2100	2.81536313	0	0.35519397	0	1	6	FALSE	HSD17B10	1969	1	0	0	0.77307961		FALSE	0	HSD17B10	0	0
2102	2.81536313	0	0.35519397	0	1	6	FALSE	RABEP1	1969	1	0	0	0.77307961		FALSE	0	RABEP1	0	0
2104	2.81536313	0	0.35519397	0	1	6	FALSE	AFTPH	1969	1	0	0	0.77307961		FALSE	0	AFTPH	0	0
2106	2.81536313	0	0.35519397	0	1	6	FALSE	RABEP2	1969	1	0	0	0.77307961		FALSE	0	RABEP2	0	0
2108	2.81536313	0	0.35519397	0	1	6	FALSE	TCEB3	1969	1	0	0	0.77307961		FALSE	0	TCEB3	0	0
2110	2.81536313	0	0.35519397	0	1	6	FALSE	SEC24D	1969	1	0	0	0.77307961		FALSE	0	SEC24D	0	0
2112	2.81536313	0	0.35519397	0	1	6	FALSE	ACIN1	1969	1	0	0	0.77307961		FALSE	0	ACIN1	0	0
2114	2.81536313	0	0.35519397	0	1	6	FALSE	DHX8	1969	1	0	0	0.77307961		FALSE	0	DHX8	0	0
2116	2.81536313	0	0.35519397	0	1	6	FALSE	LRCH3	1969	1	0	0	0.77307961		FALSE	0	LRCH3	0	0
2118	2.81536313	0	0.35519397	0	1	6	FALSE	HSD17B4	1969	1	0	0	0.77307961		FALSE	0	HSD17B4	0	0
2120	2.81536313	0	0.35519397	0	1	6	FALSE	MAPK8IP3	1969	1	0	0	0.77307961		FALSE	0	MAPK8IP3	0	0
2122	2.81536313	0	0.35519397	0	1	6	FALSE	WASF1	1969	1	0	0	0.77307961		FALSE	0	WASF1	0	0
2124	2.81536313	0	0.35519397	0	1	6	FALSE	EPRS	1969	1	0	0	0.77307961		FALSE	0	EPRS	0	0
2126	2.75083799	0.00138906	0.36352559	0.33333333	3	6	FALSE	JUP	717.6666667	3	0	0	0.78114525		FALSE	0	JUP	458416	0.34191293
2128	2.81536313	0	0.35519397	0	1	6	FALSE	DNAJC10	1969	1	0	0	0.77307961		FALSE	0	DNAJC10	0	0
2130	2.81536313	0	0.35519397	0	1	6	FALSE	ACAA2	1969	1	0	0	0.77307961		FALSE	0	ACAA2	0	0
2133	2.81536313	0	0.35519397	0	1	6	FALSE	MAP1S	1969	1	0	0	0.77307961		FALSE	0	MAP1S	0	0
2135	2.81536313	0	0.35519397	0	1	6	FALSE	OSBPL8	1969	1	0	0	0.77307961		FALSE	0	OSBPL8	0	0
2137	2.81536313	0	0.35519397	0	1	6	FALSE	DNAJA1	1969	1	0	0	0.77307961		FALSE	0	DNAJA1	0	0
2139	2.81536313	0	0.35519397	0	1	6	FALSE	LCMT2	1969	1	0	0	0.77307961		FALSE	0	LCMT2	0	0
2141	2.79804469	2.16E-06	0.35739243	0.66666667	3	6	FALSE	MAPK1	693	3	0	0	0.77524441		FALSE	0	MAPK1	756	0.34154756
2143	2.81536313	0	0.35519397	0	1	6	FALSE	KLC4	1969	1	0	0	0.77307961		FALSE	0	KLC4	0	0
2145	2.81536313	0	0.35519397	0	1	6	FALSE	BOP1	1969	1	0	0	0.77307961		FALSE	0	BOP1	0	0
2147	2.81536313	0	0.35519397	0	1	6	FALSE	MATR3	1969	1	0	0	0.77307961		FALSE	0	MATR3	0	0
2149	2.81536313	0	0.35519397	0	1	6	FALSE	ATP5B	1969	1	0	0	0.77307961		FALSE	0	ATP5B	0	0
2151	2.80810056	4.42E-04	0.3561126	0	2	6	FALSE	DCTN4	995	2	0	0	0.77398743		FALSE	0	DCTN4	63716	0.50176678
2153	2.81536313	0	0.35519397	0	1	6	FALSE	GOLIM4	1969	1	0	0	0.77307961		FALSE	0	GOLIM4	0	0
2155	2.81536313	0	0.35519397	0	1	6	FALSE	CTTNBP2NL	1969	1	0	0	0.77307961		FALSE	0	CTTNBP2NL	0	0
2157	2.81536313	0	0.35519397	0	1	6	FALSE	RPAP3	1969	1	0	0	0.77307961		FALSE	0	RPAP3	0	0
2159	2.81536313	0	0.35519397	0	1	6	FALSE	U2AF1	1969	1	0	0	0.77307961		FALSE	0	U2AF1	0	0
2161	2.81536313	0	0.35519397	0	1	6	FALSE	FDPS	1969	1	0	0	0.77307961		FALSE	0	FDPS	0	0
2163	2.81536313	0	0.35519397	0	1	6	FALSE	PRPF4B	1969	1	0	0	0.77307961		FALSE	0	PRPF4B	0	0
2165	2.81536313	0	0.35519397	0	1	6	FALSE	PDGFRA	1969	1	0	0	0.77307961		FALSE	0	PDGFRA	0	0
2167	2.81536313	0	0.35519397	0	1	6	FALSE	MEX3A	1969	1	0	0	0.77307961		FALSE	0	MEX3A	0	0
2169	2.81536313	0	0.35519397	0	1	6	FALSE	CLINT1	1969	1	0	0	0.77307961		FALSE	0	CLINT1	0	0
2171	2.79134078	4.52E-04	0.35825078	0	2	6	FALSE	CHUK	1017	2	0	0	0.7760824		FALSE	0	CHUK	193552	0.50547264
2173	2.81536313	0	0.35519397	0	1	6	FALSE	PHOX2A	1969	1	0	0	0.77307961		FALSE	0	PHOX2A	0	0
2175	2.81536313	0	0.35519397	0	1	6	FALSE	HEATR6	1969	1	0	0	0.77307961		FALSE	0	HEATR6	0	0
2177	2.81536313	0	0.35519397	0	1	6	FALSE	SLK	1969	1	0	0	0.77307961		FALSE	0	SLK	0	0
2179	2.81536313	0	0.35519397	0	1	6	FALSE	HP1BP3	1969	1	0	0	0.77307961		FALSE	0	HP1BP3	0	0
2181	2.81536313	0	0.35519397	0	1	6	FALSE	KPNA1	1969	1	0	0	0.77307961		FALSE	0	KPNA1	0	0
2183	2.81536313	0	0.35519397	0	1	6	FALSE	LSS	1969	1	0	0	0.77307961		FALSE	0	LSS	0	0
2185	2.81536313	0	0.35519397	0	1	6	FALSE	ARG1	1969	1	0	0	0.77307961		FALSE	0	ARG1	0	0
2187	2.81536313	0	0.35519397	0	1	6	FALSE	GBF1	1969	1	0	0	0.77307961		FALSE	0	GBF1	0	0
2189	2.81536313	0	0.35519397	0	1	6	FALSE	DNAAF5	1969	1	0	0	0.77307961		FALSE	0	DNAAF5	0	0
2191	2.81536313	0	0.35519397	0	1	6	FALSE	POLR3B	1969	1	0	0	0.77307961		FALSE	0	POLR3B	0	0
2193	2.81536313	0	0.35519397	0	1	6	FALSE	KIAA0196	1969	1	0	0	0.77307961		FALSE	0	KIAA0196	0	0
2195	2.81536313	0	0.35519397	0	1	6	FALSE	HERC4	1969	1	0	0	0.77307961		FALSE	0	HERC4	0	0
2197	2.81536313	0	0.35519397	0	1	6	FALSE	LEMD3	1969	1	0	0	0.77307961		FALSE	0	LEMD3	0	0
2199	2.81536313	0	0.35519397	0	1	6	FALSE	PIGT	1969	1	0	0	0.77307961		FALSE	0	PIGT	0	0
2202	2.81536313	0	0.35519397	0	1	6	FALSE	CCT6A	1969	1	0	0	0.77307961		FALSE	0	CCT6A	0	0
2204	2.81536313	0	0.35519397	0	1	6	FALSE	PSMC2	1969	1	0	0	0.77307961		FALSE	0	PSMC2	0	0
2206	2.81536313	0	0.35519397	0	1	6	FALSE	ANKFY1	1969	1	0	0	0.77307961		FALSE	0	ANKFY1	0	0
2208	2.81536313	0	0.35519397	0	1	6	FALSE	TIMM44	1969	1	0	0	0.77307961		FALSE	0	TIMM44	0	0
2210	2.81536313	0	0.35519397	0	1	6	FALSE	VPS33A	1969	1	0	0	0.77307961		FALSE	0	VPS33A	0	0
2212	2.81536313	0	0.35519397	0	1	6	FALSE	RPL10	1969	1	0	0	0.77307961		FALSE	0	RPL10	0	0
2214	2.81536313	0	0.35519397	0	1	6	FALSE	INTS1	1969	1	0	0	0.77307961		FALSE	0	INTS1	0	0
2216	2.79162011	3.79E-04	0.35821493	0	2	6	FALSE	EFTUD1	1020	2	0	0	0.77604749		FALSE	0	EFTUD1	201164	0.50696517
2218	2.81536313	0	0.35519397	0	1	6	FALSE	EIF2B1	1969	1	0	0	0.77307961		FALSE	0	EIF2B1	0	0
2220	2.81536313	0	0.35519397	0	1	6	FALSE	NDUFA10	1969	1	0	0	0.77307961		FALSE	0	NDUFA10	0	0
2222	2.80726257	3.87E-04	0.35621891	0	2	6	FALSE	DFFA	996.5	2	0	0	0.77409218		FALSE	0	DFFA	68908	0.50227043
2225	2.81536313	0	0.35519397	0	1	6	FALSE	GNL2	1969	1	0	0	0.77307961		FALSE	0	GNL2	0	0
2227	2.79273743	0	0.35807161	1	2	6	FALSE	SMC3	1032.5	2	0	0	0.77590782		FALSE	0	SMC3	0	0.50887137
2229	2.81536313	0	0.35519397	0	1	6	FALSE	NUP214	1969	1	0	0	0.77307961		FALSE	0	NUP214	0	0
2231	2.81536313	0	0.35519397	0	1	6	FALSE	ABL2	1969	1	0	0	0.77307961		FALSE	0	ABL2	0	0
2233	2.81536313	0	0.35519397	0	1	6	FALSE	CCAR1	1969	1	0	0	0.77307961		FALSE	0	CCAR1	0	0
2235	2.73603352	4.02E-04	0.3654926	0	2	6	FALSE	STXBP1	1075	2	0	0	0.78299581		FALSE	0	STXBP1	386604	0.51609803
2237	2.81536313	0	0.35519397	0	1	6	FALSE	GEMIN5	1969	1	0	0	0.77307961		FALSE	0	GEMIN5	0	0
2239	2.81536313	0	0.35519397	0	1	6	FALSE	TPP2	1969	1	0	0	0.77307961		FALSE	0	TPP2	0	0
2242	2.78687151	5.18E-04	0.3588253	0	2	6	FALSE	KIAA1279	1024	2	0	0	0.77664106		FALSE	0	KIAA1279	236884	0.50643564
2244	2.80726257	6.84E-04	0.35621891	0	2	6	FALSE	PSPC1	994.5	2	0	0	0.77409218		FALSE	0	PSPC1	78722	0.50126135
2246	2.81536313	0	0.35519397	0	1	6	FALSE	NOL9	1969	1	0	0	0.77307961		FALSE	0	NOL9	0	0
2248	2.81536313	0	0.35519397	0	1	6	FALSE	VPS51	1969	1	0	0	0.77307961		FALSE	0	VPS51	0	0
2250	2.73603352	4.02E-04	0.3654926	0	2	6	FALSE	MAGED2	1075	2	0	0	0.78299581		FALSE	0	MAGED2	386604	0.51609803
2252	2.81536313	0	0.35519397	0	1	6	FALSE	PPM1F	1969	1	0	0	0.77307961		FALSE	0	PPM1F	0	0
2254	2.81536313	0	0.35519397	0	1	6	FALSE	SKIV2L	1969	1	0	0	0.77307961		FALSE	0	SKIV2L	0	0
2256	2.81536313	0	0.35519397	0	1	6	FALSE	CNOT3	1969	1	0	0	0.77307961		FALSE	0	CNOT3	0	0
2258	2.81536313	0	0.35519397	0	1	6	FALSE	FAM21A	1969	1	0	0	0.77307961		FALSE	0	FAM21A	0	0
2260	2.81005587	1.29E-04	0.35586481	0	2	6	FALSE	EWSR1	996.5	2	0	0	0.77374302		FALSE	0	EWSR1	44222	0.50354072
2262	2.72653631	4.60E-04	0.3667657	0.33333333	3	6	FALSE	YBX1	735.3333333	3	0	0	0.78418296		FALSE	0	YBX1	398532	0.34817622
2264	2.81536313	0	0.35519397	0	1	6	FALSE	PRKAA1	1969	1	0	0	0.77307961		FALSE	0	PRKAA1	0	0
2268	2.80726257	3.87E-04	0.35621891	0	2	6	FALSE	MYO6	996.5	2	0	0	0.77409218		FALSE	0	MYO6	68908	0.50227043
2270	2.81536313	0	0.35519397	0	1	6	FALSE	RARS	1969	1	0	0	0.77307961		FALSE	0	RARS	0	0
2272	2.81536313	0	0.35519397	0	1	6	FALSE	TAOK1	1969	1	0	0	0.77307961		FALSE	0	TAOK1	0	0
2274	2.81536313	0	0.35519397	0	1	6	FALSE	KNTC1	1969	1	0	0	0.77307961		FALSE	0	KNTC1	0	0
2276	2.78687151	5.18E-04	0.3588253	0	2	6	FALSE	MTA1	1024	2	0	0	0.77664106		FALSE	0	MTA1	236884	0.50643564
2278	2.80865922	0	0.35604177	1	2	6	FALSE	NRCAM	1002	2	0	0	0.7739176		FALSE	0	NRCAM	0	0.50301205
2280	2.81536313	0	0.35519397	0	1	6	FALSE	EIF3J	1969	1	0	0	0.77307961		FALSE	0	EIF3J	0	0
2282	2.81536313	0	0.35519397	0	1	6	FALSE	GTF3C1	1969	1	0	0	0.77307961		FALSE	0	GTF3C1	0	0
2284	2.81536313	0	0.35519397	0	1	6	FALSE	ERCC2	1969	1	0	0	0.77307961		FALSE	0	ERCC2	0	0
2287	2.81536313	0	0.35519397	0	1	6	FALSE	CPD	1969	1	0	0	0.77307961		FALSE	0	CPD	0	0
2290	2.81536313	0	0.35519397	0	1	6	FALSE	AP2A1	1969	1	0	0	0.77307961		FALSE	0	AP2A1	0	0
2292	2.81536313	0	0.35519397	0	1	6	FALSE	METAP2	1969	1	0	0	0.77307961		FALSE	0	METAP2	0	0
2295	2.81536313	0	0.35519397	0	1	6	FALSE	AP3B2	1969	1	0	0	0.77307961		FALSE	0	AP3B2	0	0
2297	2.81536313	0	0.35519397	0	1	6	FALSE	NAP1L4	1969	1	0	0	0.77307961		FALSE	0	NAP1L4	0	0
2299	2.81536313	0	0.35519397	0	1	6	FALSE	MAT2A	1969	1	0	0	0.77307961		FALSE	0	MAT2A	0	0
2301	2.81536313	0	0.35519397	0	1	6	FALSE	SPAG9	1969	1	0	0	0.77307961		FALSE	0	SPAG9	0	0
2303	2.79273743	0	0.35807161	1	2	6	FALSE	DECR1	1032.5	2	0	0	0.77590782		FALSE	0	DECR1	0	0.50887137
2305	2.81536313	0	0.35519397	0	1	6	FALSE	NUP210	1969	1	0	0	0.77307961		FALSE	0	NUP210	0	0
2307	2.81536313	0	0.35519397	0	1	6	FALSE	LBR	1969	1	0	0	0.77307961		FALSE	0	LBR	0	0
2310	2.79273743	0	0.35807161	1	2	6	FALSE	HYOU1	1032.5	2	0	0	0.77590782		FALSE	0	HYOU1	0	0.50887137
2312	2.81536313	0	0.35519397	0	1	6	FALSE	PAK4	1969	1	0	0	0.77307961		FALSE	0	PAK4	0	0
2314	2.81536313	0	0.35519397	0	1	6	FALSE	ATP5C1	1969	1	0	0	0.77307961		FALSE	0	ATP5C1	0	0
2316	2.81089385	6.12E-04	0.35575872	0	2	6	FALSE	XRN1	990	2	0	0	0.77363827		FALSE	0	XRN1	45616	0.50075949
2318	2.81536313	0	0.35519397	0	1	6	FALSE	XRN2	1969	1	0	0	0.77307961		FALSE	0	XRN2	0	0
2320	2.81536313	0	0.35519397	0	1	6	FALSE	NCAPG	1969	1	0	0	0.77307961		FALSE	0	NCAPG	0	0
2322	2.80083799	4.79E-04	0.357036	0	2	6	FALSE	LIMA1	1004	2	0	0	0.77489525		FALSE	0	LIMA1	124534	0.50300903
2324	2.78687151	5.18E-04	0.3588253	0	2	6	FALSE	GPKOW	1024	2	0	0	0.77664106		FALSE	0	GPKOW	236884	0.50643564
2326	2.81536313	0	0.35519397	0	1	6	FALSE	MIOS	1969	1	0	0	0.77307961		FALSE	0	MIOS	0	0
2328	2.81536313	0	0.35519397	0	1	6	FALSE	HECTD3	1969	1	0	0	0.77307961		FALSE	0	HECTD3	0	0
2331	2.81536313	0	0.35519397	0	1	6	FALSE	SLC4A1AP	1969	1	0	0	0.77307961		FALSE	0	SLC4A1AP	0	0
2333	2.81536313	0	0.35519397	0	1	6	FALSE	MRPS35	1969	1	0	0	0.77307961		FALSE	0	MRPS35	0	0
2335	2.81536313	0	0.35519397	0	1	6	FALSE	HARS	1969	1	0	0	0.77307961		FALSE	0	HARS	0	0
2337	2.81536313	0	0.35519397	0	1	6	FALSE	MYEF2	1969	1	0	0	0.77307961		FALSE	0	MYEF2	0	0
2340	2.81536313	0	0.35519397	0	1	6	FALSE	HLA-A	1969	1	0	0	0.77307961		FALSE	0	HLA-A	0	0
2342	2.81536313	0	0.35519397	0	1	6	FALSE	IDH2	1969	1	0	0	0.77307961		FALSE	0	IDH2	0	0
2344	2.81536313	0	0.35519397	0	1	6	FALSE	ARHGEF1	1969	1	0	0	0.77307961		FALSE	0	ARHGEF1	0	0
2346	2.81536313	0	0.35519397	0	1	6	FALSE	MED23	1969	1	0	0	0.77307961		FALSE	0	MED23	0	0
2348	2.81536313	0	0.35519397	0	1	6	FALSE	DBH	1969	1	0	0	0.77307961		FALSE	0	DBH	0	0
2351	2.81536313	0	0.35519397	0	1	6	FALSE	LLGL1	1969	1	0	0	0.77307961		FALSE	0	LLGL1	0	0
2353	2.81536313	0	0.35519397	0	1	6	FALSE	PTPN1	1969	1	0	0	0.77307961		FALSE	0	PTPN1	0	0
2355	2.81536313	0	0.35519397	0	1	6	FALSE	FERMT2	1969	1	0	0	0.77307961		FALSE	0	FERMT2	0	0
2357	2.73603352	4.02E-04	0.3654926	0	2	6	FALSE	DDX39A	1075	2	0	0	0.78299581		FALSE	0	DDX39A	386604	0.51609803
2360	2.81536313	0	0.35519397	0	1	6	FALSE	OSBPL9	1969	1	0	0	0.77307961		FALSE	0	OSBPL9	0	0
2362	2.81536313	0	0.35519397	0	1	6	FALSE	MRPL38	1969	1	0	0	0.77307961		FALSE	0	MRPL38	0	0
2364	2.79134078	0.00100133	0.35825078	0	3	6	FALSE	ABCD1	678	3	0	0	0.7760824		FALSE	0	ABCD1	221920	0.33681592
2366	2.81536313	0	0.35519397	0	1	6	FALSE	DDX19A	1969	1	0	0	0.77307961		FALSE	0	DDX19A	0	0
2368	2.81536313	0	0.35519397	0	1	6	FALSE	RUFY3	1969	1	0	0	0.77307961		FALSE	0	RUFY3	0	0
2370	2.81536313	0	0.35519397	0	1	6	FALSE	CCNT1	1969	1	0	0	0.77307961		FALSE	0	CCNT1	0	0
2372	2.81536313	0	0.35519397	0	1	6	FALSE	QKI	1969	1	0	0	0.77307961		FALSE	0	QKI	0	0
2374	2.81536313	0	0.35519397	0	1	6	FALSE	CARM1	1969	1	0	0	0.77307961		FALSE	0	CARM1	0	0
2376	2.81536313	0	0.35519397	0	1	6	FALSE	SNRNP200	1969	1	0	0	0.77307961		FALSE	0	SNRNP200	0	0
2378	2.81536313	0	0.35519397	0	1	6	FALSE	ATXN1L	1969	1	0	0	0.77307961		FALSE	0	ATXN1L	0	0
2380	2.79636872	6.59E-04	0.35760663	0	2	6	FALSE	KIAA1429	1008.5	2	0	0	0.77545391		FALSE	0	KIAA1429	135102	0.50249377
2382	2.81536313	0	0.35519397	0	1	6	FALSE	TRMT1L	1969	1	0	0	0.77307961		FALSE	0	TRMT1L	0	0
2385	2.81536313	0	0.35519397	0	1	6	FALSE	U2AF2	1969	1	0	0	0.77307961		FALSE	0	U2AF2	0	0
2387	2.81536313	0	0.35519397	0	1	6	FALSE	PHB2	1969	1	0	0	0.77307961		FALSE	0	PHB2	0	0
2389	2.81536313	0	0.35519397	0	1	6	FALSE	USP5	1969	1	0	0	0.77307961		FALSE	0	USP5	0	0
2391	2.81536313	0	0.35519397	0	1	6	FALSE	KLC2	1969	1	0	0	0.77307961		FALSE	0	KLC2	0	0
2393	2.81536313	0	0.35519397	0	1	6	FALSE	ELAVL4	1969	1	0	0	0.77307961		FALSE	0	ELAVL4	0	0
2395	2.81536313	0	0.35519397	0	1	6	FALSE	DHX57	1969	1	0	0	0.77307961		FALSE	0	DHX57	0	0
2398	2.81536313	0	0.35519397	0	1	6	FALSE	PDXP	1969	1	0	0	0.77307961		FALSE	0	PDXP	0	0
2400	2.81536313	0	0.35519397	0	1	6	FALSE	SYT11	1969	1	0	0	0.77307961		FALSE	0	SYT11	0	0
2402	2.81536313	0	0.35519397	0	1	6	FALSE	KIAA1524	1969	1	0	0	0.77307961		FALSE	0	KIAA1524	0	0
2404	2.73603352	4.02E-04	0.3654926	0	2	6	FALSE	CAD	1075	2	0	0	0.78299581		FALSE	0	CAD	386604	0.51609803
2406	2.80949721	6.13E-04	0.35593557	0	2	6	FALSE	THOC2	988	2	0	0	0.77381285		FALSE	0	THOC2	38112	0.50025342
2408	2.81536313	0	0.35519397	0	1	6	FALSE	PCBP2	1969	1	0	0	0.77307961		FALSE	0	PCBP2	0	0
2410	2.78100559	9.31E-04	0.35958216	0	2	6	FALSE	CASK	1023.5	2	0	0	0.7773743		FALSE	0	CASK	279020	0.50419132
2412	2.81536313	0	0.35519397	0	1	6	FALSE	2-Sep	1969	1	0	0	0.77307961		FALSE	0	2-Sep	0	0
2414	2.81536313	0	0.35519397	0	1	6	FALSE	FXR1	1969	1	0	0	0.77307961		FALSE	0	FXR1	0	0
2416	2.81536313	0	0.35519397	0	1	6	FALSE	MRPS27	1969	1	0	0	0.77307961		FALSE	0	MRPS27	0	0
2418	2.81536313	0	0.35519397	0	1	6	FALSE	ZNF207	1969	1	0	0	0.77307961		FALSE	0	ZNF207	0	0
2420	2.81536313	0	0.35519397	0	1	6	FALSE	TECR	1969	1	0	0	0.77307961		FALSE	0	TECR	0	0
2422	2.81536313	0	0.35519397	0	1	6	FALSE	WDR48	1969	1	0	0	0.77307961		FALSE	0	WDR48	0	0
2424	2.81536313	0	0.35519397	0	1	6	FALSE	RSRC2	1969	1	0	0	0.77307961		FALSE	0	RSRC2	0	0
2426	2.81536313	0	0.35519397	0	1	6	FALSE	CKB	1969	1	0	0	0.77307961		FALSE	0	CKB	0	0
2428	2.81536313	0	0.35519397	0	1	6	FALSE	HMGB2	1969	1	0	0	0.77307961		FALSE	0	HMGB2	0	0
2430	2.81536313	0	0.35519397	0	1	6	FALSE	RANBP6	1969	1	0	0	0.77307961		FALSE	0	RANBP6	0	0
2432	2.81536313	0	0.35519397	0	1	6	FALSE	ERLIN1	1969	1	0	0	0.77307961		FALSE	0	ERLIN1	0	0
2434	2.81536313	0	0.35519397	0	1	6	FALSE	TANC1	1969	1	0	0	0.77307961		FALSE	0	TANC1	0	0
2436	2.81536313	0	0.35519397	0	1	6	FALSE	HNRNPL	1969	1	0	0	0.77307961		FALSE	0	HNRNPL	0	0
2438	2.81536313	0	0.35519397	0	1	6	FALSE	KIAA1033	1969	1	0	0	0.77307961		FALSE	0	KIAA1033	0	0
2440	2.81536313	0	0.35519397	0	1	6	FALSE	LPHN2	1969	1	0	0	0.77307961		FALSE	0	LPHN2	0	0
2442	2.81536313	0	0.35519397	0	1	6	FALSE	PABPC1	1969	1	0	0	0.77307961		FALSE	0	PABPC1	0	0
2444	2.81536313	0	0.35519397	0	1	6	FALSE	SMARCAL1	1969	1	0	0	0.77307961		FALSE	0	SMARCAL1	0	0
2446	2.81536313	0	0.35519397	0	1	6	FALSE	PTPN9	1969	1	0	0	0.77307961		FALSE	0	PTPN9	0	0
2448	2.81536313	0	0.35519397	0	1	6	FALSE	TROVE2	1969	1	0	0	0.77307961		FALSE	0	TROVE2	0	0
2450	2.81536313	0	0.35519397	0	1	6	FALSE	SLC12A2	1969	1	0	0	0.77307961		FALSE	0	SLC12A2	0	0
2453	2.81536313	0	0.35519397	0	1	6	FALSE	TIPRL	1969	1	0	0	0.77307961		FALSE	0	TIPRL	0	0
2455	2.81536313	0	0.35519397	0	1	6	FALSE	HNRNPH1	1969	1	0	0	0.77307961		FALSE	0	HNRNPH1	0	0
2457	2.78687151	5.18E-04	0.3588253	0	2	6	FALSE	NSUN2	1024	2	0	0	0.77664106		FALSE	0	NSUN2	236884	0.50643564
2459	2.73603352	4.02E-04	0.3654926	0	2	6	FALSE	TNPO1	1075	2	0	0	0.78299581		FALSE	0	TNPO1	386604	0.51609803
2461	2.81536313	0	0.35519397	0	1	6	FALSE	PREP	1969	1	0	0	0.77307961		FALSE	0	PREP	0	0
2464	2.81536313	0	0.35519397	0	1	6	FALSE	TGM1	1969	1	0	0	0.77307961		FALSE	0	TGM1	0	0
2467	2.81536313	0	0.35519397	0	1	6	FALSE	ELAC2	1969	1	0	0	0.77307961		FALSE	0	ELAC2	0	0
2470	2.81089385	6.12E-04	0.35575872	0	2	6	FALSE	HNRNPD	990	2	0	0	0.77363827		FALSE	0	HNRNPD	45616	0.50075949
2473	2.81536313	0	0.35519397	0	1	6	FALSE	MYO5A	1969	1	0	0	0.77307961		FALSE	0	MYO5A	0	0
2476	2.77709497	5.06E-04	0.36008851	0.33333333	3	6	FALSE	PPP1R12A	705	3	0	0	0.77786313		FALSE	0	PPP1R12A	209148	0.34173941
2478	2.81536313	0	0.35519397	0	1	6	FALSE	WRNIP1	1969	1	0	0	0.77307961		FALSE	0	WRNIP1	0	0
2480	2.81536313	0	0.35519397	0	1	6	FALSE	ABCF3	1969	1	0	0	0.77307961		FALSE	0	ABCF3	0	0
2482	2.81536313	0	0.35519397	0	1	6	FALSE	ACADM	1969	1	0	0	0.77307961		FALSE	0	ACADM	0	0
2484	2.81536313	0	0.35519397	0	1	6	FALSE	POLR1B	1969	1	0	0	0.77307961		FALSE	0	POLR1B	0	0
2486	2.81480447	5.59E-04	0.35526446	0	2	6	FALSE	TBC1D4	985	2	0	0	0.77314944		FALSE	0	TBC1D4	53314	0.5
2488	2.81536313	0	0.35519397	0	1	6	FALSE	IPO7	1969	1	0	0	0.77307961		FALSE	0	IPO7	0	0
2490	2.81536313	0	0.35519397	0	1	6	FALSE	AP3M1	1969	1	0	0	0.77307961		FALSE	0	AP3M1	0	0
2492	2.81536313	0	0.35519397	0	1	6	FALSE	DDX41	1969	1	0	0	0.77307961		FALSE	0	DDX41	0	0
2494	2.81536313	0	0.35519397	0	1	6	FALSE	MRPS34	1969	1	0	0	0.77307961		FALSE	0	MRPS34	0	0
2496	2.81536313	0	0.35519397	0	1	6	FALSE	LSM14B	1969	1	0	0	0.77307961		FALSE	0	LSM14B	0	0
2499	2.81536313	0	0.35519397	0	1	6	FALSE	CAT	1969	1	0	0	0.77307961		FALSE	0	CAT	0	0
2501	2.81536313	0	0.35519397	0	1	6	FALSE	SERPINB6	1969	1	0	0	0.77307961		FALSE	0	SERPINB6	0	0
2503	2.81536313	0	0.35519397	0	1	6	FALSE	KIAA1211	1969	1	0	0	0.77307961		FALSE	0	KIAA1211	0	0
2505	2.81536313	0	0.35519397	0	1	6	FALSE	SENP3	1969	1	0	0	0.77307961		FALSE	0	SENP3	0	0
2507	2.81536313	0	0.35519397	0	1	6	FALSE	TMX3	1969	1	0	0	0.77307961		FALSE	0	TMX3	0	0
2509	2.81536313	0	0.35519397	0	1	6	FALSE	ATP1A1	1969	1	0	0	0.77307961		FALSE	0	ATP1A1	0	0
2511	2.81536313	0	0.35519397	0	1	6	FALSE	PPID	1969	1	0	0	0.77307961		FALSE	0	PPID	0	0
2513	2.81536313	0	0.35519397	0	1	6	FALSE	DNMT1	1969	1	0	0	0.77307961		FALSE	0	DNMT1	0	0
2515	2.80586592	4.89E-04	0.35639622	0	2	6	FALSE	PRKCSH	997.5	2	0	0	0.77426676		FALSE	0	PRKCSH	94000	0.50226815
2517	2.81536313	0	0.35519397	0	1	6	FALSE	RARS2	1969	1	0	0	0.77307961		FALSE	0	RARS2	0	0
2519	2.81536313	0	0.35519397	0	1	6	FALSE	XRCC1	1969	1	0	0	0.77307961		FALSE	0	XRCC1	0	0
2521	2.80083799	0	0.357036	1	2	6	FALSE	CTNND1	1022	2	0	0	0.77489525		FALSE	0	CTNND1	0	0.50594059
2523	2.81536313	0	0.35519397	0	1	6	FALSE	GNAI3	1969	1	0	0	0.77307961		FALSE	0	GNAI3	0	0
2525	2.81536313	0	0.35519397	0	1	6	FALSE	IDE	1969	1	0	0	0.77307961		FALSE	0	IDE	0	0
2527	2.81536313	0	0.35519397	0	1	6	FALSE	AP3B1	1969	1	0	0	0.77307961		FALSE	0	AP3B1	0	0
2529	2.81536313	0	0.35519397	0	1	6	FALSE	COG1	1969	1	0	0	0.77307961		FALSE	0	COG1	0	0
2531	2.81536313	0	0.35519397	0	1	6	FALSE	COG3	1969	1	0	0	0.77307961		FALSE	0	COG3	0	0
2533	2.81536313	0	0.35519397	0	1	6	FALSE	DYNC1H1	1969	1	0	0	0.77307961		FALSE	0	DYNC1H1	0	0
2535	2.81536313	0	0.35519397	0	1	6	FALSE	COPG2	1969	1	0	0	0.77307961		FALSE	0	COPG2	0	0
2537	2.79273743	4.10E-04	0.35807161	0	2	6	FALSE	PGAM5	1018.5	2	0	0	0.77590782		FALSE	0	PGAM5	205482	0.50647088
2539	2.81536313	0	0.35519397	0	1	6	FALSE	PFKP	1969	1	0	0	0.77307961		FALSE	0	PFKP	0	0
2541	2.81536313	0	0.35519397	0	1	6	FALSE	HSP90AB2P	1969	1	0	0	0.77307961		FALSE	0	HSP90AB2P	0	0
2543	2.81536313	0	0.35519397	0	1	6	FALSE	DDX24	1969	1	0	0	0.77307961		FALSE	0	DDX24	0	0
2545	2.81536313	0	0.35519397	0	1	6	FALSE	TRA2B	1969	1	0	0	0.77307961		FALSE	0	TRA2B	0	0
2547	2.81536313	0	0.35519397	0	1	6	FALSE	EXOC4	1969	1	0	0	0.77307961		FALSE	0	EXOC4	0	0
2549	2.81536313	0	0.35519397	0	1	6	FALSE	DLAT	1969	1	0	0	0.77307961		FALSE	0	DLAT	0	0
2551	2.81536313	0	0.35519397	0	1	6	FALSE	RPS3A	1969	1	0	0	0.77307961		FALSE	0	RPS3A	0	0
2553	2.44329609	0.02359667	0.40928318	0.01092896	62	5	FALSE	TBL1XR1	35.7704918	62	0	1	0.81958799		FALSE	0	TBL1XR1	1002730	0.01719626
2556	2.81536313	0	0.35519397	0	1	6	FALSE	GOLGA3	1969	1	0	0	0.77307961		FALSE	0	GOLGA3	0	0
2558	2.81536313	0	0.35519397	0	1	6	FALSE	DDX56	1969	1	0	0	0.77307961		FALSE	0	DDX56	0	0
2560	2.81536313	0	0.35519397	0	1	6	FALSE	DDX55	1969	1	0	0	0.77307961		FALSE	0	DDX55	0	0
2562	2.81536313	0	0.35519397	0	1	6	FALSE	RALA	1969	1	0	0	0.77307961		FALSE	0	RALA	0	0
2564	2.80670391	3.41E-04	0.35628981	0	2	6	FALSE	AMFR	997.5	2	0	0	0.77416201		FALSE	0	AMFR	70338	0.50226815
2566	2.79162011	3.79E-04	0.35821493	0	2	6	FALSE	ZPR1	1020	2	0	0	0.77604749		FALSE	0	ZPR1	201164	0.50696517
2569	2.81536313	0	0.35519397	0	1	6	FALSE	SRRT	1969	1	0	0	0.77307961		FALSE	0	SRRT	0	0
2571	2.81536313	0	0.35519397	0	1	6	FALSE	KPNA2	1969	1	0	0	0.77307961		FALSE	0	KPNA2	0	0
2573	2.81536313	0	0.35519397	0	1	6	FALSE	GAREML	1969	1	0	0	0.77307961		FALSE	0	GAREML	0	0
2575	2.79832402	7.59E-04	0.35735676	0	2	6	FALSE	PPP2CA	1005	2	0	0	0.7752095		FALSE	0	PPP2CA	449946	0.5025025
2577	2.81536313	0	0.35519397	0	1	6	FALSE	TRAPPC8	1969	1	0	0	0.77307961		FALSE	0	TRAPPC8	0	0
2579	2.81536313	0	0.35519397	0	1	6	FALSE	DBNL	1969	1	0	0	0.77307961		FALSE	0	DBNL	0	0
2582	2.81536313	0	0.35519397	0	1	6	FALSE	STT3A	1969	1	0	0	0.77307961		FALSE	0	STT3A	0	0
2584	2.81536313	0	0.35519397	0	1	6	FALSE	DDX10	1969	1	0	0	0.77307961		FALSE	0	DDX10	0	0
2586	2.81536313	0	0.35519397	0	1	6	FALSE	MAP7D1	1969	1	0	0	0.77307961		FALSE	0	MAP7D1	0	0
2588	2.81536313	0	0.35519397	0	1	6	FALSE	DARS2	1969	1	0	0	0.77307961		FALSE	0	DARS2	0	0
2590	2.81536313	0	0.35519397	0	1	6	FALSE	CCDC6	1969	1	0	0	0.77307961		FALSE	0	CCDC6	0	0
2592	2.81536313	0	0.35519397	0	1	6	FALSE	SCFD1	1969	1	0	0	0.77307961		FALSE	0	SCFD1	0	0
2594	2.81536313	0	0.35519397	0	1	6	FALSE	SNX2	1969	1	0	0	0.77307961		FALSE	0	SNX2	0	0
2596	2.81536313	0	0.35519397	0	1	6	FALSE	RTCB	1969	1	0	0	0.77307961		FALSE	0	RTCB	0	0
2598	2.81536313	0	0.35519397	0	1	6	FALSE	IPO11	1969	1	0	0	0.77307961		FALSE	0	IPO11	0	0
2600	2.81536313	0	0.35519397	0	1	6	FALSE	HIST1H2BL	1969	1	0	0	0.77307961		FALSE	0	HIST1H2BL	0	0
2603	2.81536313	0	0.35519397	0	1	6	FALSE	HAT1	1969	1	0	0	0.77307961		FALSE	0	HAT1	0	0
2605	2.81536313	0	0.35519397	0	1	6	FALSE	LUC7L2	1969	1	0	0	0.77307961		FALSE	0	LUC7L2	0	0
2608	2.81536313	0	0.35519397	0	1	6	FALSE	ARHGEF11	1969	1	0	0	0.77307961		FALSE	0	ARHGEF11	0	0
2610	2.81536313	0	0.35519397	0	1	6	FALSE	NELFA	1969	1	0	0	0.77307961		FALSE	0	NELFA	0	0
2612	2.81536313	0	0.35519397	0	1	6	FALSE	ASNS	1969	1	0	0	0.77307961		FALSE	0	ASNS	0	0
2614	2.81536313	0	0.35519397	0	1	6	FALSE	ZC3H7A	1969	1	0	0	0.77307961		FALSE	0	ZC3H7A	0	0
2616	2.74804469	0.00140395	0.3638951	0.33333333	4	6	FALSE	CDH2	547	4	0	0	0.78149441		FALSE	0	CDH2	465418	0.25949217
2618	2.81536313	0	0.35519397	0	1	6	FALSE	WBP11	1969	1	0	0	0.77307961		FALSE	0	WBP11	0	0
2620	2.81536313	0	0.35519397	0	1	6	FALSE	FANCI	1969	1	0	0	0.77307961		FALSE	0	FANCI	0	0
2624	2.79553073	9.13E-04	0.35771383	0	2	6	FALSE	GOLGA2	1007.5	2	0	0	0.77555866		FALSE	0	GOLGA2	170522	0.50224551
2626	2.79273743	0	0.35807161	1	2	6	FALSE	PRDX1	1032.5	2	0	0	0.77590782		FALSE	0	PRDX1	0	0.50887137
2628	2.81536313	0	0.35519397	0	1	6	FALSE	PICALM	1969	1	0	0	0.77307961		FALSE	0	PICALM	0	0
2632	2.78296089	0.00276034	0.35932952	0	3	6	FALSE	PML	685.3333333	3	0	0	0.77712989		FALSE	0	PML	405644	0.33760895
2634	2.81536313	0	0.35519397	0	1	6	FALSE	ADAR	1969	1	0	0	0.77307961		FALSE	0	ADAR	0	0
2636	2.81536313	0	0.35519397	0	1	6	FALSE	PDHB	1969	1	0	0	0.77307961		FALSE	0	PDHB	0	0
2638	2.81536313	0	0.35519397	0	1	6	FALSE	MDH2	1969	1	0	0	0.77307961		FALSE	0	MDH2	0	0
2640	2.81536313	0	0.35519397	0	1	6	FALSE	CLPTM1L	1969	1	0	0	0.77307961		FALSE	0	CLPTM1L	0	0
2642	2.81536313	0	0.35519397	0	1	6	FALSE	TRIM46	1969	1	0	0	0.77307961		FALSE	0	TRIM46	0	0
2644	2.79832402	7.59E-04	0.35735676	0	2	6	FALSE	TCF4	1005	2	0	0	0.7752095		FALSE	0	TCF4	449946	0.5025025
2646	2.81536313	0	0.35519397	0	1	6	FALSE	ATP13A1	1969	1	0	0	0.77307961		FALSE	0	ATP13A1	0	0
2648	2.81536313	0	0.35519397	0	1	6	FALSE	STRAP	1969	1	0	0	0.77307961		FALSE	0	STRAP	0	0
2651	2.80083799	4.79E-04	0.357036	0	2	6	FALSE	ATP2A2	1004	2	0	0	0.77489525		FALSE	0	ATP2A2	124534	0.50300903
2653	2.80335196	0.00291016	0.35671582	0	2	6	FALSE	RPL17	996.5	2	0	0	0.77458101		FALSE	0	RPL17	114040	0.50025126
2655	2.81536313	0	0.35519397	0	1	6	FALSE	NUP85	1969	1	0	0	0.77307961		FALSE	0	NUP85	0	0
2657	2.81536313	0	0.35519397	0	1	6	FALSE	LIMCH1	1969	1	0	0	0.77307961		FALSE	0	LIMCH1	0	0
2659	2.81536313	0	0.35519397	0	1	6	FALSE	MPP6	1969	1	0	0	0.77307961	mRNAdown	FALSE	0	MPP6	0	0
2661	2.81536313	0	0.35519397	0	1	6	FALSE	MCM7	1969	1	0	0	0.77307961		FALSE	0	MCM7	0	0
2663	2.81536313	0	0.35519397	0	1	6	FALSE	DBR1	1969	1	0	0	0.77307961		FALSE	0	DBR1	0	0
2665	2.80726257	3.87E-04	0.35621891	0	2	6	FALSE	UBA2	996.5	2	0	0	0.77409218		FALSE	0	UBA2	68908	0.50227043
2667	2.81536313	0	0.35519397	0	1	6	FALSE	HSPA4L	1969	1	0	0	0.77307961		FALSE	0	HSPA4L	0	0
2669	2.81536313	0	0.35519397	0	1	6	FALSE	OGFR	1969	1	0	0	0.77307961		FALSE	0	OGFR	0	0
2671	2.81536313	0	0.35519397	0	1	6	FALSE	BCCIP	1969	1	0	0	0.77307961		FALSE	0	BCCIP	0	0
2673	2.81536313	0	0.35519397	0	1	6	FALSE	SH2B2	1969	1	0	0	0.77307961		FALSE	0	SH2B2	0	0
2675	2.81536313	0	0.35519397	0	1	6	FALSE	EFTUD2	1969	1	0	0	0.77307961		FALSE	0	EFTUD2	0	0
2677	2.73603352	4.02E-04	0.3654926	0	2	6	FALSE	TUBB3	1075	2	0	0	0.78299581		FALSE	0	TUBB3	386604	0.51609803
2679	2.81452514	2.19E-04	0.35529972	0	2	6	FALSE	VAPB	986	2	0	0	0.77318436		FALSE	0	VAPB	46306	0.50025394
2681	2.81536313	0	0.35519397	0	1	6	FALSE	G3BP1	1969	1	0	0	0.77307961		FALSE	0	G3BP1	0	0
2683	2.81536313	0	0.35519397	0	1	6	FALSE	CCAR2	1969	1	0	0	0.77307961		FALSE	0	CCAR2	0	0
2686	2.78826816	0.00141214	0.35864556	0	2	6	FALSE	NDUFS2	1010.5	2	0	0	0.77646648		FALSE	0	NDUFS2	219098	0.50198906
2688	2.81536313	0	0.35519397	0	1	6	FALSE	STRA6	1969	1	0	0	0.77307961		FALSE	0	STRA6	0	0
2690	2.81536313	0	0.35519397	0	1	6	FALSE	UGGT1	1969	1	0	0	0.77307961		FALSE	0	UGGT1	0	0
2692	2.81536313	0	0.35519397	0	1	6	FALSE	SGPL1	1969	1	0	0	0.77307961		FALSE	0	SGPL1	0	0
2696	2.80726257	3.87E-04	0.35621891	0	2	6	FALSE	SIN3A	996.5	2	0	0	0.77409218		FALSE	0	SIN3A	68908	0.50227043
2698	2.81536313	0	0.35519397	0	1	6	FALSE	STK11IP	1969	1	0	0	0.77307961		FALSE	0	STK11IP	0	0
2700	2.81536313	0	0.35519397	0	1	6	FALSE	NUP93	1969	1	0	0	0.77307961		FALSE	0	NUP93	0	0
2702	2.81536313	0	0.35519397	0	1	6	FALSE	HAUS5	1969	1	0	0	0.77307961		FALSE	0	HAUS5	0	0
2704	2.81536313	0	0.35519397	0	1	6	FALSE	CSE1L	1969	1	0	0	0.77307961		FALSE	0	CSE1L	0	0
2706	2.81536313	0	0.35519397	0	1	6	FALSE	FIP1L1	1969	1	0	0	0.77307961		FALSE	0	FIP1L1	0	0
2708	2.81536313	0	0.35519397	0	1	6	FALSE	PLXNA4	1969	1	0	0	0.77307961		FALSE	0	PLXNA4	0	0
2710	2.81536313	0	0.35519397	0	1	6	FALSE	SORD	1969	1	0	0	0.77307961		FALSE	0	SORD	0	0
2712	2.81536313	0	0.35519397	0	1	6	FALSE	TGM3	1969	1	0	0	0.77307961		FALSE	0	TGM3	0	0
2716	2.81536313	0	0.35519397	0	1	6	FALSE	BZW1	1969	1	0	0	0.77307961		FALSE	0	BZW1	0	0
2718	2.81536313	0	0.35519397	0	1	6	FALSE	RSBN1L	1969	1	0	0	0.77307961		FALSE	0	RSBN1L	0	0
2720	2.81536313	0	0.35519397	0	1	6	FALSE	MON2	1969	1	0	0	0.77307961		FALSE	0	MON2	0	0
2722	2.81536313	0	0.35519397	0	1	6	FALSE	IPO4	1969	1	0	0	0.77307961		FALSE	0	IPO4	0	0
2724	2.81536313	0	0.35519397	0	1	6	FALSE	ALDOC	1969	1	0	0	0.77307961		FALSE	0	ALDOC	0	0
2726	2.81536313	0	0.35519397	0	1	6	FALSE	ALDOA	1969	1	0	0	0.77307961		FALSE	0	ALDOA	0	0
2728	2.81536313	0	0.35519397	0	1	6	FALSE	PSMA6	1969	1	0	0	0.77307961		FALSE	0	PSMA6	0	0
2731	2.81536313	0	0.35519397	0	1	6	FALSE	ATP1A3	1969	1	0	0	0.77307961		FALSE	0	ATP1A3	0	0
2733	2.81536313	0	0.35519397	0	1	6	FALSE	NRD1	1969	1	0	0	0.77307961		FALSE	0	NRD1	0	0
2735	2.81536313	0	0.35519397	0	1	6	FALSE	DSC1	1969	1	0	0	0.77307961		FALSE	0	DSC1	0	0
2737	2.64804469	0.00593567	0.37763713	0.08333333	9	6	FALSE	CUL3	273.3333333	9	0	0	0.79399441		FALSE	0	CUL3	1423330	0.12059141
2740	2.70558659	0.00103243	0.36960562	0	3	6	FALSE	CUL2	745.6666667	3	0	0	0.78680168		FALSE	0	CUL2	671678	0.34862672
2742	2.81536313	0	0.35519397	0	1	6	FALSE	CWC22	1969	1	0	0	0.77307961		FALSE	0	CWC22	0	0
2744	2.81536313	0	0.35519397	0	1	6	FALSE	DFNA5	1969	1	0	0	0.77307961		FALSE	0	DFNA5	0	0
2746	2.81536313	0	0.35519397	0	1	6	FALSE	ZC3H15	1969	1	0	0	0.77307961		FALSE	0	ZC3H15	0	0
2748	2.79636872	0.00162659	0.35760663	0	2	6	FALSE	STAM	992.5	2	0	0	0.77545391		FALSE	0	STAM	67728	0.50025227
2750	2.81536313	0	0.35519397	0	1	6	FALSE	DPYSL5	1969	1	0	0	0.77307961		FALSE	0	DPYSL5	0	0
2752	2.81340782	4.57E-04	0.35544083	0	2	6	FALSE	HSP90AA1	987.5	2	0	0	0.77332402		FALSE	0	HSP90AA1	141096	0.50050736
2754	2.81536313	0	0.35519397	0	1	6	FALSE	VPS16	1969	1	0	0	0.77307961		FALSE	0	VPS16	0	0
2756	2.81536313	0	0.35519397	0	1	6	FALSE	SEC23A	1969	1	0	0	0.77307961		FALSE	0	SEC23A	0	0
2758	2.81536313	0	0.35519397	0	1	6	FALSE	THOP1	1969	1	0	0	0.77307961		FALSE	0	THOP1	0	0
2760	2.81536313	0	0.35519397	0	1	6	FALSE	RUFY1	1969	1	0	0	0.77307961		FALSE	0	RUFY1	0	0
2762	2.81536313	0	0.35519397	0	1	6	FALSE	TBC1D15	1969	1	0	0	0.77307961		FALSE	0	TBC1D15	0	0
2764	2.81536313	0	0.35519397	0	1	6	FALSE	RPS4X	1969	1	0	0	0.77307961		FALSE	0	RPS4X	0	0
2766	2.81536313	0	0.35519397	0	1	6	FALSE	NAA16	1969	1	0	0	0.77307961		FALSE	0	NAA16	0	0
2768	2.81536313	0	0.35519397	0	1	6	FALSE	AKR1B1	1969	1	0	0	0.77307961		FALSE	0	AKR1B1	0	0
2770	2.81536313	0	0.35519397	0	1	6	FALSE	EXOC2	1969	1	0	0	0.77307961		FALSE	0	EXOC2	0	0
2772	2.81536313	0	0.35519397	0	1	6	FALSE	TMOD1	1969	1	0	0	0.77307961		FALSE	0	TMOD1	0	0
2774	2.81536313	0	0.35519397	0	1	6	FALSE	AHSA1	1969	1	0	0	0.77307961		FALSE	0	AHSA1	0	0
2776	2.81536313	0	0.35519397	0	1	6	FALSE	ALDH16A1	1969	1	0	0	0.77307961		FALSE	0	ALDH16A1	0	0
2778	2.81536313	0	0.35519397	0	1	6	FALSE	NAA15	1969	1	0	0	0.77307961		FALSE	0	NAA15	0	0
2781	2.81536313	0	0.35519397	0	1	6	FALSE	NAA10	1969	1	0	0	0.77307961		FALSE	0	NAA10	0	0
2783	2.81536313	0	0.35519397	0	1	6	FALSE	H1FX	1969	1	0	0	0.77307961		FALSE	0	H1FX	0	0
2785	2.81536313	0	0.35519397	0	1	6	FALSE	GNB1	1969	1	0	0	0.77307961		FALSE	0	GNB1	0	0
2787	2.81536313	0	0.35519397	0	1	6	FALSE	XAB2	1969	1	0	0	0.77307961		FALSE	0	XAB2	0	0
2789	2.81536313	0	0.35519397	0	1	6	FALSE	KIAA0020	1969	1	0	0	0.77307961		FALSE	0	KIAA0020	0	0
2791	2.81536313	0	0.35519397	0	1	6	FALSE	IARS	1969	1	0	0	0.77307961		FALSE	0	IARS	0	0
2794	2.80502793	0	0.35650269	1	2	6	FALSE	PAFAH1B1	1012.5	2	0	0	0.77437151		FALSE	0	PAFAH1B1	0	0.505997
2796	2.73603352	4.02E-04	0.3654926	0	2	6	FALSE	ENO2	1075	2	0	0	0.78299581		FALSE	0	ENO2	386604	0.51609803
2798	2.81536313	0	0.35519397	0	1	6	FALSE	ENO1	1969	1	0	0	0.77307961		FALSE	0	ENO1	0	0
2801	2.81536313	0	0.35519397	0	1	6	FALSE	NUP155	1969	1	0	0	0.77307961		FALSE	0	NUP155	0	0
2803	2.81536313	0	0.35519397	0	1	6	FALSE	ARHGEF7	1969	1	0	0	0.77307961		FALSE	0	ARHGEF7	0	0
2805	2.81536313	0	0.35519397	0	1	6	FALSE	THYN1	1969	1	0	0	0.77307961		FALSE	0	THYN1	0	0
2807	2.81536313	0	0.35519397	0	1	6	FALSE	PRMT3	1969	1	0	0	0.77307961		FALSE	0	PRMT3	0	0
2809	2.81536313	0	0.35519397	0	1	6	FALSE	CMTR1	1969	1	0	0	0.77307961		FALSE	0	CMTR1	0	0
2811	2.80558659	5.54E-04	0.3564317	0	2	6	FALSE	MAP4K3	996.5	2	0	0	0.77430168		FALSE	0	MAP4K3	80150	0.50125881
2813	2.81536313	0	0.35519397	0	1	6	FALSE	DNAJC13	1969	1	0	0	0.77307961		FALSE	0	DNAJC13	0	0
2815	2.81536313	0	0.35519397	0	1	6	FALSE	NAA25	1969	1	0	0	0.77307961		FALSE	0	NAA25	0	0
2817	2.81536313	0	0.35519397	0	1	6	FALSE	MMS19	1969	1	0	0	0.77307961		FALSE	0	MMS19	0	0
2819	2.81536313	0	0.35519397	0	1	6	FALSE	TALDO1	1969	1	0	0	0.77307961		FALSE	0	TALDO1	0	0
2821	2.71368715	8.92E-04	0.36850232	0	3	6	FALSE	POLR2B	740.3333333	3	0	0	0.78578911		FALSE	0	POLR2B	615974	0.34874214
2823	2.80223464	0	0.35685805	1	2	6	FALSE	CD2BP2	1015	2	0	0	0.77472067		FALSE	0	CD2BP2	0	0.50522648
2825	2.79357542	4.92E-04	0.3579642	0.33333333	4	6	FALSE	DCTN1	519.25	4	0	0	0.77580307		FALSE	0	DCTN1	67526	0.25591716
2827	2.81536313	0	0.35519397	0	1	6	FALSE	PRRC2A	1969	1	0	0	0.77307961		FALSE	0	PRRC2A	0	0
2829	2.81536313	0	0.35519397	0	1	6	FALSE	CDK4	1969	1	0	0	0.77307961		FALSE	0	CDK4	0	0
2831	2.81536313	0	0.35519397	0	1	6	FALSE	LARS2	1969	1	0	0	0.77307961		FALSE	0	LARS2	0	0
2833	2.81536313	0	0.35519397	0	1	6	FALSE	CLGN	1969	1	0	0	0.77307961	mRNAdown	FALSE	0	CLGN	0	0
2835	2.81536313	0	0.35519397	0	1	6	FALSE	C1QBP	1969	1	0	0	0.77307961		FALSE	0	C1QBP	0	0
2837	2.81536313	0	0.35519397	0	1	6	FALSE	ZC3H4	1969	1	0	0	0.77307961		FALSE	0	ZC3H4	0	0
2839	2.81536313	0	0.35519397	0	1	6	FALSE	C7	1969	1	0	0	0.77307961		FALSE	0	C7	0	0
2841	2.81536313	0	0.35519397	0	1	6	FALSE	SF3A3	1969	1	0	0	0.77307961		FALSE	0	SF3A3	0	0
2843	2.81536313	0	0.35519397	0	1	6	FALSE	REPS1	1969	1	0	0	0.77307961		FALSE	0	REPS1	0	0
2845	2.81536313	0	0.35519397	0	1	6	FALSE	MRPL19	1969	1	0	0	0.77307961		FALSE	0	MRPL19	0	0
2847	2.81536313	0	0.35519397	0	1	6	FALSE	RAN	1969	1	0	0	0.77307961		FALSE	0	RAN	0	0
2849	2.81536313	0	0.35519397	0	1	6	FALSE	NAA35	1969	1	0	0	0.77307961		FALSE	0	NAA35	0	0
2851	2.81536313	0	0.35519397	0	1	6	FALSE	ATP5A1	1969	1	0	0	0.77307961		FALSE	0	ATP5A1	0	0
2853	2.81536313	0	0.35519397	0	1	6	FALSE	PDIA3	1969	1	0	0	0.77307961		FALSE	0	PDIA3	0	0
2855	2.81536313	0	0.35519397	0	1	6	FALSE	GATAD2B	1969	1	0	0	0.77307961		FALSE	0	GATAD2B	0	0
2857	2.81536313	0	0.35519397	0	1	6	FALSE	C9orf64	1969	1	0	0	0.77307961		FALSE	0	C9orf64	0	0
2859	2.81536313	0	0.35519397	0	1	6	FALSE	PDIA4	1969	1	0	0	0.77307961		FALSE	0	PDIA4	0	0
2861	2.8	0.00224392	0.35714286	0	2	6	FALSE	DBN1	998.5	2	0	0	0.775		FALSE	0	DBN1	141666	0.50050176
2863	2.81536313	0	0.35519397	0	1	6	FALSE	PDIA6	1969	1	0	0	0.77307961		FALSE	0	PDIA6	0	0
2865	2.81536313	0	0.35519397	0	1	6	FALSE	HEATR1	1969	1	0	0	0.77307961		FALSE	0	HEATR1	0	0
2867	2.81536313	0	0.35519397	0	1	6	FALSE	TBL3	1969	1	0	0	0.77307961		FALSE	0	TBL3	0	0
2869	2.81536313	0	0.35519397	0	1	6	FALSE	VPS45	1969	1	0	0	0.77307961		FALSE	0	VPS45	0	0
2872	2.79273743	4.10E-04	0.35807161	0	2	6	FALSE	CTNNA1	1018.5	2	0	0	0.77590782		FALSE	0	CTNNA1	205482	0.50647088
2874	2.81536313	0	0.35519397	0	1	6	FALSE	MOGS	1969	1	0	0	0.77307961		FALSE	0	MOGS	0	0
2876	2.81536313	0	0.35519397	0	1	6	FALSE	DRG1	1969	1	0	0	0.77307961		FALSE	0	DRG1	0	0
2878	2.81536313	0	0.35519397	0	1	6	FALSE	TRIM33	1969	1	0	0	0.77307961		FALSE	0	TRIM33	0	0
2880	2.81536313	0	0.35519397	0	1	6	FALSE	ENAH	1969	1	0	0	0.77307961		FALSE	0	ENAH	0	0
2883	2.81536313	0	0.35519397	0	1	6	FALSE	RPS3	1969	1	0	0	0.77307961		FALSE	0	RPS3	0	0
2885	2.81536313	0	0.35519397	0	1	6	FALSE	PGM1	1969	1	0	0	0.77307961		FALSE	0	PGM1	0	0
2887	2.81536313	0	0.35519397	0	1	6	FALSE	PPFIBP1	1969	1	0	0	0.77307961		FALSE	0	PPFIBP1	0	0
2889	2.81536313	0	0.35519397	0	1	6	FALSE	PGLS	1969	1	0	0	0.77307961		FALSE	0	PGLS	0	0
2891	2.81536313	0	0.35519397	0	1	6	FALSE	CIC	1969	1	0	0	0.77307961		FALSE	0	CIC	0	0
2893	2.81536313	0	0.35519397	0	1	6	FALSE	DCP1A	1969	1	0	0	0.77307961		FALSE	0	DCP1A	0	0
2895	2.81536313	0	0.35519397	0	1	6	FALSE	SLC25A10	1969	1	0	0	0.77307961		FALSE	0	SLC25A10	0	0
2898	2.81536313	0	0.35519397	0	1	6	FALSE	EIF3F	1969	1	0	0	0.77307961		FALSE	0	EIF3F	0	0
2900	2.80223464	0	0.35685805	1	2	6	FALSE	EMD	1015	2	0	0	0.77472067		FALSE	0	EMD	0	0.50522648
2902	2.81536313	0	0.35519397	0	1	6	FALSE	TRAPPC11	1969	1	0	0	0.77307961		FALSE	0	TRAPPC11	0	0
2904	2.81536313	0	0.35519397	0	1	6	FALSE	LRRN3	1969	1	0	0	0.77307961	mRNAdown	FALSE	0	LRRN3	0	0
2906	2.81536313	0	0.35519397	0	1	6	FALSE	S100A9	1969	1	0	0	0.77307961	mRNAup	FALSE	0	S100A9	0	0
2908	2.81536313	0	0.35519397	0	1	6	FALSE	UPF2	1969	1	0	0	0.77307961		FALSE	0	UPF2	0	0
2910	2.65642458	0.00291915	0.37644585	0.2	6	6	FALSE	CTNNB1	405	6	0	0	0.79294693		FALSE	0	CTNNB1	1011108	0.17921464
2912	2.81536313	0	0.35519397	0	1	6	FALSE	TNPO3	1969	1	0	0	0.77307961		FALSE	0	TNPO3	0	0
2914	2.81536313	0	0.35519397	0	1	6	FALSE	NUDT5	1969	1	0	0	0.77307961		FALSE	0	NUDT5	0	0
2916	2.81536313	0	0.35519397	0	1	6	FALSE	ACVR1B	1969	1	0	0	0.77307961		FALSE	0	ACVR1B	0	0
2918	2.81536313	0	0.35519397	0	1	6	FALSE	CLCN5	1969	1	0	0	0.77307961		FALSE	0	CLCN5	0	0
2920	2.79972067	0.00312484	0.35717849	0	3	6	FALSE	AUP1	667.6666667	3	0	0	0.77503492		FALSE	0	AUP1	609034	0.33416876
2922	2.81536313	0	0.35519397	0	1	6	FALSE	CANX	1969	1	0	0	0.77307961		FALSE	0	CANX	0	0
2924	2.80083799	0	0.357036	1	2	6	FALSE	PLCG1	1022	2	0	0	0.77489525		FALSE	0	PLCG1	0	0.50594059
2926	2.81536313	0	0.35519397	0	1	6	FALSE	KIF21A	1969	1	0	0	0.77307961		FALSE	0	KIF21A	0	0
2928	2.81536313	0	0.35519397	0	1	6	FALSE	POP1	1969	1	0	0	0.77307961		FALSE	0	POP1	0	0
2931	2.81536313	0	0.35519397	0	1	6	FALSE	PTPRF	1969	1	0	0	0.77307961		FALSE	0	PTPRF	0	0
2933	2.81536313	0	0.35519397	0	1	6	FALSE	EEF1B2	1969	1	0	0	0.77307961		FALSE	0	EEF1B2	0	0
2935	2.81536313	0	0.35519397	0	1	6	FALSE	CCDC93	1969	1	0	0	0.77307961		FALSE	0	CCDC93	0	0
2937	2.81536313	0	0.35519397	0	1	6	FALSE	ILVBL	1969	1	0	0	0.77307961		FALSE	0	ILVBL	0	0
2939	2.79189944	5.33E-04	0.35817909	0	2	6	FALSE	ASAP1	1013.5	2	0	0	0.77601257		FALSE	0	ASAP1	169564	0.5044843
2941	2.81536313	0	0.35519397	0	1	6	FALSE	PSMA1	1969	1	0	0	0.77307961		FALSE	0	PSMA1	0	0
2943	2.81536313	0	0.35519397	0	1	6	FALSE	PIK3R2	1969	1	0	0	0.77307961		FALSE	0	PIK3R2	0	0
2945	2.81536313	0	0.35519397	0	1	6	FALSE	EIF4E	1969	1	0	0	0.77307961		FALSE	0	EIF4E	0	0
2947	2.81536313	0	0.35519397	0	1	6	FALSE	CCT8	1969	1	0	0	0.77307961		FALSE	0	CCT8	0	0
2949	2.81536313	0	0.35519397	0	1	6	FALSE	CPSF2	1969	1	0	0	0.77307961		FALSE	0	CPSF2	0	0
2951	2.73603352	4.02E-04	0.3654926	0	2	6	FALSE	TCP1	1075	2	0	0	0.78299581		FALSE	0	TCP1	386604	0.51609803
2953	2.81536313	0	0.35519397	0	1	6	FALSE	CCT7	1969	1	0	0	0.77307961		FALSE	0	CCT7	0	0
2955	2.81536313	0	0.35519397	0	1	6	FALSE	CLUH	1969	1	0	0	0.77307961		FALSE	0	CLUH	0	0
2957	2.81536313	0	0.35519397	0	1	6	FALSE	CCT4	1969	1	0	0	0.77307961		FALSE	0	CCT4	0	0
2959	2.81536313	0	0.35519397	0	1	6	FALSE	HSD17B12	1969	1	0	0	0.77307961		FALSE	0	HSD17B12	0	0
2961	2.81536313	0	0.35519397	0	1	6	FALSE	PTPRS	1969	1	0	0	0.77307961		FALSE	0	PTPRS	0	0
2963	2.71620112	0.00185169	0.36816125	0	4	6	FALSE	PLK1	551	4	0	0	0.78547486		FALSE	0	PLK1	592776	0.25992439
2968	2.81536313	0	0.35519397	0	1	6	FALSE	WDR7	1969	1	0	0	0.77307961		FALSE	0	WDR7	0	0
2970	2.81536313	0	0.35519397	0	1	6	FALSE	MSI2	1969	1	0	0	0.77307961		FALSE	0	MSI2	0	0
2972	2.81536313	0	0.35519397	0	1	6	FALSE	RBM12	1969	1	0	0	0.77307961		FALSE	0	RBM12	0	0
2975	2.81536313	0	0.35519397	0	1	6	FALSE	TXNDC5	1969	1	0	0	0.77307961		FALSE	0	TXNDC5	0	0
2978	2.80586592	4.89E-04	0.35639622	0	2	6	FALSE	SDHA	997.5	2	0	0	0.77426676		FALSE	0	SDHA	94000	0.50226815
2980	2.79273743	0	0.35807161	1	2	6	FALSE	POLE	1032.5	2	0	0	0.77590782		FALSE	0	POLE	0	0.50887137
2982	2.81536313	0	0.35519397	0	1	6	FALSE	TARDBP	1969	1	0	0	0.77307961		FALSE	0	TARDBP	0	0
2984	2.81536313	0	0.35519397	0	1	6	FALSE	PARG	1969	1	0	0	0.77307961		FALSE	0	PARG	0	0
2987	2.81536313	0	0.35519397	0	1	6	FALSE	MCCC1	1969	1	0	0	0.77307961		FALSE	0	MCCC1	0	0
2989	2.81536313	0	0.35519397	0	1	6	FALSE	RQCD1	1969	1	0	0	0.77307961		FALSE	0	RQCD1	0	0
2991	2.81536313	0	0.35519397	0	1	6	FALSE	FUBP3	1969	1	0	0	0.77307961		FALSE	0	FUBP3	0	0
2993	2.81536313	0	0.35519397	0	1	6	FALSE	GTF3C4	1969	1	0	0	0.77307961		FALSE	0	GTF3C4	0	0
2995	2.81536313	0	0.35519397	0	1	6	FALSE	ETFA	1969	1	0	0	0.77307961		FALSE	0	ETFA	0	0
2997	2.81536313	0	0.35519397	0	1	6	FALSE	ACTR1A	1969	1	0	0	0.77307961		FALSE	0	ACTR1A	0	0
2999	2.81536313	0	0.35519397	0	1	6	FALSE	METTL13	1969	1	0	0	0.77307961		FALSE	0	METTL13	0	0
3001	2.81536313	0	0.35519397	0	1	6	FALSE	ATP1B1	1969	1	0	0	0.77307961	mRNAdown	FALSE	0	ATP1B1	0	0
3003	2.81536313	0	0.35519397	0	1	6	FALSE	TUBGCP3	1969	1	0	0	0.77307961		FALSE	0	TUBGCP3	0	0
3005	2.81536313	0	0.35519397	0	1	6	FALSE	GNA13	1969	1	0	0	0.77307961		FALSE	0	GNA13	0	0
3007	2.81536313	0	0.35519397	0	1	6	FALSE	RBM28	1969	1	0	0	0.77307961		FALSE	0	RBM28	0	0
3009	2.81424581	0.00111701	0.35533499	0	2	6	FALSE	OXSR1	985.5	2	0	0	0.77321927		FALSE	0	OXSR1	106624	0.5
3011	2.81536313	0	0.35519397	0	1	6	FALSE	RBM26	1969	1	0	0	0.77307961		FALSE	0	RBM26	0	0
3013	2.81536313	0	0.35519397	0	1	6	FALSE	RBM25	1969	1	0	0	0.77307961		FALSE	0	RBM25	0	0
3015	2.81536313	0	0.35519397	0	1	6	FALSE	DNAJC9	1969	1	0	0	0.77307961		FALSE	0	DNAJC9	0	0
3017	2.81536313	0	0.35519397	0	1	6	FALSE	AP2B1	1969	1	0	0	0.77307961		FALSE	0	AP2B1	0	0
3019	2.81536313	0	0.35519397	0	1	6	FALSE	DICER1	1969	1	0	0	0.77307961		FALSE	0	DICER1	0	0
3021	2.81536313	0	0.35519397	0	1	6	FALSE	PDCD4	1969	1	0	0	0.77307961		FALSE	0	PDCD4	0	0
3023	2.81536313	0	0.35519397	0	1	6	FALSE	NUP205	1969	1	0	0	0.77307961		FALSE	0	NUP205	0	0
3025	2.81536313	0	0.35519397	0	1	6	FALSE	ATXN2L	1969	1	0	0	0.77307961		FALSE	0	ATXN2L	0	0
3027	2.81536313	0	0.35519397	0	1	6	FALSE	LARP4	1969	1	0	0	0.77307961		FALSE	0	LARP4	0	0
3029	2.81536313	0	0.35519397	0	1	6	FALSE	CSTF3	1969	1	0	0	0.77307961		FALSE	0	CSTF3	0	0
3031	2.80223464	0	0.35685805	1	2	6	FALSE	SMARCD2	1015	2	0	0	0.77472067		FALSE	0	SMARCD2	0	0.50522648
3033	2.81536313	0	0.35519397	0	1	6	FALSE	MAP4K4	1969	1	0	0	0.77307961		FALSE	0	MAP4K4	0	0
3035	2.81536313	0	0.35519397	0	1	6	FALSE	STT3B	1969	1	0	0	0.77307961		FALSE	0	STT3B	0	0
3037	2.81536313	0	0.35519397	0	1	6	FALSE	SMEK2	1969	1	0	0	0.77307961		FALSE	0	SMEK2	0	0
3039	2.81536313	0	0.35519397	0	1	6	FALSE	PNPT1	1969	1	0	0	0.77307961		FALSE	0	PNPT1	0	0
3041	2.81536313	0	0.35519397	0	1	6	FALSE	TMEM59	1969	1	0	0	0.77307961		FALSE	0	TMEM59	0	0
3043	2.81536313	0	0.35519397	0	1	6	FALSE	CNP	1969	1	0	0	0.77307961		FALSE	0	CNP	0	0
3045	2.81536313	0	0.35519397	0	1	6	FALSE	IMPDH1	1969	1	0	0	0.77307961		FALSE	0	IMPDH1	0	0
3047	2.81536313	0	0.35519397	0	1	6	FALSE	LAS1L	1969	1	0	0	0.77307961		FALSE	0	LAS1L	0	0
3049	2.81536313	0	0.35519397	0	1	6	FALSE	IMPDH2	1969	1	0	0	0.77307961		FALSE	0	IMPDH2	0	0
3051	2.81536313	0	0.35519397	0	1	6	FALSE	ARAP1	1969	1	0	0	0.77307961		FALSE	0	ARAP1	0	0
3053	2.81536313	0	0.35519397	0	1	6	FALSE	RASA4	1969	1	0	0	0.77307961		FALSE	0	RASA4	0	0
3055	2.78882682	8.15E-04	0.35857372	0	3	6	FALSE	SRPK1	683.3333333	3	0	0	0.77639665		FALSE	0	SRPK1	388268	0.33862696
3057	2.73603352	4.02E-04	0.3654926	0	2	6	FALSE	PRPS1	1075	2	0	0	0.78299581		FALSE	0	PRPS1	386604	0.51609803
3059	2.79162011	3.79E-04	0.35821493	0	2	6	FALSE	RPRD2	1020	2	0	0	0.77604749		FALSE	0	RPRD2	201164	0.50696517
3061	2.81536313	0	0.35519397	0	1	6	FALSE	DVL3	1969	1	0	0	0.77307961		FALSE	0	DVL3	0	0
3063	2.81536313	0	0.35519397	0	1	6	FALSE	PPP6C	1969	1	0	0	0.77307961		FALSE	0	PPP6C	0	0
3065	2.81536313	0	0.35519397	0	1	6	FALSE	ACBD3	1969	1	0	0	0.77307961		FALSE	0	ACBD3	0	0
3067	2.81536313	0	0.35519397	0	1	6	FALSE	AHCY	1969	1	0	0	0.77307961		FALSE	0	AHCY	0	0
3069	2.81536313	0	0.35519397	0	1	6	FALSE	NCAPG2	1969	1	0	0	0.77307961		FALSE	0	NCAPG2	0	0
3071	2.81536313	0	0.35519397	0	1	6	FALSE	USO1	1969	1	0	0	0.77307961		FALSE	0	USO1	0	0
3073	2.81536313	0	0.35519397	0	1	6	FALSE	SORT1	1969	1	0	0	0.77307961		FALSE	0	SORT1	0	0
3075	2.81536313	0	0.35519397	0	1	6	FALSE	MARS	1969	1	0	0	0.77307961		FALSE	0	MARS	0	0
3077	2.7273743	0.00170676	0.36665301	0	3	6	FALSE	RUVBL2	723.6666667	3	0	0	0.78407821		FALSE	0	RUVBL2	720028	0.3446193
3079	2.81536313	0	0.35519397	0	1	6	FALSE	RPAP1	1969	1	0	0	0.77307961		FALSE	0	RPAP1	0	0
3082	2.81536313	0	0.35519397	0	1	6	FALSE	PPP4R1	1969	1	0	0	0.77307961		FALSE	0	PPP4R1	0	0
3084	2.81536313	0	0.35519397	0	1	6	FALSE	GRN	1969	1	0	0	0.77307961		FALSE	0	GRN	0	0
3086	2.73044693	0.00438498	0.36624041	0.04545455	12	6	FALSE	ELAVL1	181.8333333	12	0	0	0.78369413		FALSE	0	ELAVL1	670820	0.08614677
3088	2.81536313	0	0.35519397	0	1	6	FALSE	WASL	1969	1	0	0	0.77307961		FALSE	0	WASL	0	0
3090	2.80391061	4.65E-04	0.35664475	0	2	6	FALSE	GSTO1	1001	2	0	0	0.77451117		FALSE	0	GSTO1	103218	0.50301811
3092	2.81536313	0	0.35519397	0	1	6	FALSE	SEL1L	1969	1	0	0	0.77307961		FALSE	0	SEL1L	0	0
3094	2.81536313	0	0.35519397	0	1	6	FALSE	HCFC1	1969	1	0	0	0.77307961		FALSE	0	HCFC1	0	0
3096	2.81536313	0	0.35519397	0	1	6	FALSE	CBR1	1969	1	0	0	0.77307961		FALSE	0	CBR1	0	0
3099	2.81536313	0	0.35519397	0	1	6	FALSE	WARS	1969	1	0	0	0.77307961	mRNAup	FALSE	0	WARS	0	0
3101	2.81536313	0	0.35519397	0	1	6	FALSE	HOOK3	1969	1	0	0	0.77307961		FALSE	0	HOOK3	0	0
3103	2.81536313	0	0.35519397	0	1	6	FALSE	AMPD2	1969	1	0	0	0.77307961		FALSE	0	AMPD2	0	0
3105	2.81536313	0	0.35519397	0	1	6	FALSE	EXOC6B	1969	1	0	0	0.77307961		FALSE	0	EXOC6B	0	0
3107	2.81536313	0	0.35519397	0	1	6	FALSE	FASTKD5	1969	1	0	0	0.77307961		FALSE	0	FASTKD5	0	0
3109	2.81536313	0	0.35519397	0	1	6	FALSE	DHX40	1969	1	0	0	0.77307961		FALSE	0	DHX40	0	0
3111	2.81536313	0	0.35519397	0	1	6	FALSE	LRRC41	1969	1	0	0	0.77307961		FALSE	0	LRRC41	0	0
3113	2.79162011	3.79E-04	0.35821493	0	2	6	FALSE	PPME1	1020	2	0	0	0.77604749		FALSE	0	PPME1	201164	0.50696517
3115	2.81536313	0	0.35519397	0	1	6	FALSE	SRP68	1969	1	0	0	0.77307961		FALSE	0	SRP68	0	0
3117	2.81536313	0	0.35519397	0	1	6	FALSE	ATP6V0A1	1969	1	0	0	0.77307961		FALSE	0	ATP6V0A1	0	0
3120	2.81536313	0	0.35519397	0	1	6	FALSE	SLC25A6	1969	1	0	0	0.77307961		FALSE	0	SLC25A6	0	0
3123	2.81536313	0	0.35519397	0	1	6	FALSE	RBFOX2	1969	1	0	0	0.77307961		FALSE	0	RBFOX2	0	0
3126	2.81536313	0	0.35519397	0	1	6	FALSE	FABP3	1969	1	0	0	0.77307961		FALSE	0	FABP3	0	0
3128	2.81536313	0	0.35519397	0	1	6	FALSE	PRKACB	1969	1	0	0	0.77307961		FALSE	0	PRKACB	0	0
3130	2.81536313	0	0.35519397	0	1	6	FALSE	EIF3A	1969	1	0	0	0.77307961		FALSE	0	EIF3A	0	0
3132	2.81536313	0	0.35519397	0	1	6	FALSE	SUCLA2	1969	1	0	0	0.77307961		FALSE	0	SUCLA2	0	0
3134	2.81536313	0	0.35519397	0	1	6	FALSE	GNL1	1969	1	0	0	0.77307961		FALSE	0	GNL1	0	0
3136	2.81536313	0	0.35519397	0	1	6	FALSE	HK1	1969	1	0	0	0.77307961		FALSE	0	HK1	0	0
3138	2.81536313	0	0.35519397	0	1	6	FALSE	DHX36	1969	1	0	0	0.77307961		FALSE	0	DHX36	0	0
3140	2.81536313	0	0.35519397	0	1	6	FALSE	AVL9	1969	1	0	0	0.77307961		FALSE	0	AVL9	0	0
3142	2.81536313	0	0.35519397	0	1	6	FALSE	HNRNPR	1969	1	0	0	0.77307961		FALSE	0	HNRNPR	0	0
3144	2.81536313	0	0.35519397	0	1	6	FALSE	AGPS	1969	1	0	0	0.77307961		FALSE	0	AGPS	0	0
3147	2.81536313	0	0.35519397	0	1	6	FALSE	HNRNPU	1969	1	0	0	0.77307961		FALSE	0	HNRNPU	0	0
3149	2.81536313	0	0.35519397	0	1	6	FALSE	LDHA	1969	1	0	0	0.77307961		FALSE	0	LDHA	0	0
3151	2.81536313	0	0.35519397	0	1	6	FALSE	FARSA	1969	1	0	0	0.77307961		FALSE	0	FARSA	0	0
3153	2.81536313	0	0.35519397	0	1	6	FALSE	HSDL1	1969	1	0	0	0.77307961		FALSE	0	HSDL1	0	0
3155	2.81536313	0	0.35519397	0	1	6	FALSE	JAK1	1969	1	0	0	0.77307961		FALSE	0	JAK1	0	0
3157	2.8	0.00224392	0.35714286	0	2	6	FALSE	MLLT4	998.5	2	0	0	0.775		FALSE	0	MLLT4	141666	0.50050176
3159	2.73603352	4.02E-04	0.3654926	0	2	6	FALSE	RTN4	1075	2	0	0	0.78299581		FALSE	0	RTN4	386604	0.51609803
3162	2.81536313	0	0.35519397	0	1	6	FALSE	PRRT4	1969	1	0	0	0.77307961		FALSE	0	PRRT4	0	0
3166	2.81536313	0	0.35519397	0	1	6	FALSE	KHSRP	1969	1	0	0	0.77307961		FALSE	0	KHSRP	0	0
3168	2.81536313	0	0.35519397	0	1	6	FALSE	ADD1	1969	1	0	0	0.77307961		FALSE	0	ADD1	0	0
3170	2.81536313	0	0.35519397	0	1	6	FALSE	SRP72	1969	1	0	0	0.77307961		FALSE	0	SRP72	0	0
3173	2.81536313	0	0.35519397	0	1	6	FALSE	LEKR1	1969	1	0	0	0.77307961		FALSE	0	LEKR1	0	0
3175	2.81536313	0	0.35519397	0	1	6	FALSE	DDX42	1969	1	0	0	0.77307961		FALSE	0	DDX42	0	0
3178	2.78296089	5.50E-04	0.35932952	0	2	6	FALSE	VPRBP	1028	2	0	0	0.77712989		FALSE	0	VPRBP	253944	0.50641026
3180	2.81536313	0	0.35519397	0	1	6	FALSE	MIB1	1969	1	0	0	0.77307961		FALSE	0	MIB1	0	0
3183	2.81536313	0	0.35519397	0	1	6	FALSE	LIG3	1969	1	0	0	0.77307961		FALSE	0	LIG3	0	0
3185	2.81536313	0	0.35519397	0	1	6	FALSE	CUX1	1969	1	0	0	0.77307961		FALSE	0	CUX1	0	0
3188	2.81536313	0	0.35519397	0	1	6	FALSE	PDPR	1969	1	0	0	0.77307961		FALSE	0	PDPR	0	0
3190	2.81536313	0	0.35519397	0	1	6	FALSE	RTF1	1969	1	0	0	0.77307961		FALSE	0	RTF1	0	0
3192	2.81536313	0	0.35519397	0	1	6	FALSE	COG4	1969	1	0	0	0.77307961		FALSE	0	COG4	0	0
3194	2.81536313	0	0.35519397	0	1	6	FALSE	PHF6	1969	1	0	0	0.77307961		FALSE	0	PHF6	0	0
3196	2.81536313	0	0.35519397	0	1	6	FALSE	COG5	1969	1	0	0	0.77307961		FALSE	0	COG5	0	0
3198	2.81536313	0	0.35519397	0	1	6	FALSE	ESD	1969	1	0	0	0.77307961		FALSE	0	ESD	0	0
3200	2.80251397	0.00145141	0.35682249	0	2	6	FALSE	PRKCA	998	2	0	0	0.77468575		FALSE	0	PRKCA	116148	0.50075339
3202	2.81536313	0	0.35519397	0	1	6	FALSE	RDX	1969	1	0	0	0.77307961		FALSE	0	RDX	0	0
3204	2.81536313	0	0.35519397	0	1	6	FALSE	DDOST	1969	1	0	0	0.77307961		FALSE	0	DDOST	0	0
3206	2.81536313	0	0.35519397	0	1	6	FALSE	WDR11	1969	1	0	0	0.77307961		FALSE	0	WDR11	0	0
3208	2.81536313	0	0.35519397	0	1	6	FALSE	SLC1A5	1969	1	0	0	0.77307961		FALSE	0	SLC1A5	0	0
3210	2.81536313	0	0.35519397	0	1	6	FALSE	EML4	1969	1	0	0	0.77307961		FALSE	0	EML4	0	0
3212	2.81536313	0	0.35519397	0	1	6	FALSE	DLD	1969	1	0	0	0.77307961		FALSE	0	DLD	0	0
3214	2.81536313	0	0.35519397	0	1	6	FALSE	RPL7	1969	1	0	0	0.77307961		FALSE	0	RPL7	0	0
3217	2.81536313	0	0.35519397	0	1	6	FALSE	DDX46	1969	1	0	0	0.77307961		FALSE	0	DDX46	0	0
3219	2.81536313	0	0.35519397	0	1	6	FALSE	DPP3	1969	1	0	0	0.77307961		FALSE	0	DPP3	0	0
3221	2.81536313	0	0.35519397	0	1	6	FALSE	MAPK7	1969	1	0	0	0.77307961		FALSE	0	MAPK7	0	0
3223	2.81536313	0	0.35519397	0	1	6	FALSE	LMAN2	1969	1	0	0	0.77307961		FALSE	0	LMAN2	0	0
3225	2.76648045	9.27E-04	0.36147011	0	3	6	FALSE	CALU	706.3333333	3	0	0	0.77918994		FALSE	0	CALU	448758	0.34306096
3227	2.76061453	0.00203479	0.36223819	0.16666667	4	6	FALSE	HGS	530.5	4	0	0	0.77992318		FALSE	0	HGS	449424	0.25603865
3229	2.81536313	0	0.35519397	0	1	6	FALSE	TOP3A	1969	1	0	0	0.77307961		FALSE	0	TOP3A	0	0
3231	2.81536313	0	0.35519397	0	1	6	FALSE	EXOC3	1969	1	0	0	0.77307961		FALSE	0	EXOC3	0	0
3233	2.81536313	0	0.35519397	0	1	6	FALSE	POLRMT	1969	1	0	0	0.77307961		FALSE	0	POLRMT	0	0
3235	2.81536313	0	0.35519397	0	1	6	FALSE	EXOC5	1969	1	0	0	0.77307961		FALSE	0	EXOC5	0	0
3237	2.81536313	0	0.35519397	0	1	6	FALSE	AAAS	1969	1	0	0	0.77307961		FALSE	0	AAAS	0	0
3239	2.81536313	0	0.35519397	0	1	6	FALSE	DDX27	1969	1	0	0	0.77307961		FALSE	0	DDX27	0	0
3241	2.77681564	5.64E-04	0.36012474	0.33333333	3	6	FALSE	SQSTM1	703	3	0	0	0.77789804		FALSE	0	SQSTM1	201610	0.34076948
3243	2.81536313	0	0.35519397	0	1	6	FALSE	TCF12	1969	1	0	0	0.77307961		FALSE	0	TCF12	0	0
3245	2.81536313	0	0.35519397	0	1	6	FALSE	KPNA3	1969	1	0	0	0.77307961		FALSE	0	KPNA3	0	0
3247	2.81536313	0	0.35519397	0	1	6	FALSE	LRRC59	1969	1	0	0	0.77307961		FALSE	0	LRRC59	0	0
3249	2.81536313	0	0.35519397	0	1	6	FALSE	WDR81	1969	1	0	0	0.77307961		FALSE	0	WDR81	0	0
3251	2.81536313	0	0.35519397	0	1	6	FALSE	TRMT10C	1969	1	0	0	0.77307961		FALSE	0	TRMT10C	0	0
3253	2.81536313	0	0.35519397	0	1	6	FALSE	EXOC7	1969	1	0	0	0.77307961		FALSE	0	EXOC7	0	0
3255	2.81536313	0	0.35519397	0	1	6	FALSE	SPATA5	1969	1	0	0	0.77307961		FALSE	0	SPATA5	0	0
3257	2.78296089	7.61E-04	0.35932952	0	3	6	FALSE	HUWE1	688.6666667	3	0	0	0.77712989		FALSE	0	HUWE1	275636	0.33942086
3259	2.81536313	0	0.35519397	0	1	6	FALSE	SEC61A1	1969	1	0	0	0.77307961		FALSE	0	SEC61A1	0	0
3261	2.81536313	0	0.35519397	0	1	6	FALSE	CCBL2	1969	1	0	0	0.77307961		FALSE	0	CCBL2	0	0
3263	2.77709497	0.00112918	0.36008851	0	3	6	FALSE	PDCD6IP	690.6666667	3	0	0	0.77786313		FALSE	0	PDCD6IP	321978	0.33840366
3265	2.81536313	0	0.35519397	0	1	6	FALSE	SF1	1969	1	0	0	0.77307961		FALSE	0	SF1	0	0
3267	2.81536313	0	0.35519397	0	1	6	FALSE	DARS	1969	1	0	0	0.77307961		FALSE	0	DARS	0	0
3269	2.81536313	0	0.35519397	0	1	6	FALSE	DDX18	1969	1	0	0	0.77307961		FALSE	0	DDX18	0	0
3272	2.81536313	0	0.35519397	0	1	6	FALSE	ZCCHC8	1969	1	0	0	0.77307961		FALSE	0	ZCCHC8	0	0
3274	2.80083799	0	0.357036	1	2	6	FALSE	DDX17	1022	2	0	0	0.77489525		FALSE	0	DDX17	0	0.50594059
3276	2.81536313	0	0.35519397	0	1	6	FALSE	AARS2	1969	1	0	0	0.77307961		FALSE	0	AARS2	0	0
3278	2.81536313	0	0.35519397	0	1	6	FALSE	NUP188	1969	1	0	0	0.77307961		FALSE	0	NUP188	0	0
3280	2.81536313	0	0.35519397	0	1	6	FALSE	GIT1	1969	1	0	0	0.77307961		FALSE	0	GIT1	0	0
3282	2.81536313	0	0.35519397	0	1	6	FALSE	SUGT1	1969	1	0	0	0.77307961		FALSE	0	SUGT1	0	0
3285	2.81536313	0	0.35519397	0	1	6	FALSE	KDM3B	1969	1	0	0	0.77307961		FALSE	0	KDM3B	0	0
3287	2.81536313	0	0.35519397	0	1	6	FALSE	SNX1	1969	1	0	0	0.77307961		FALSE	0	SNX1	0	0
3289	2.81536313	0	0.35519397	0	1	6	FALSE	SRBD1	1969	1	0	0	0.77307961		FALSE	0	SRBD1	0	0
3291	2.81536313	0	0.35519397	0	1	6	FALSE	APMAP	1969	1	0	0	0.77307961		FALSE	0	APMAP	0	0
3293	2.81536313	0	0.35519397	0	1	6	FALSE	SMG8	1969	1	0	0	0.77307961		FALSE	0	SMG8	0	0
3295	2.76201117	0.00136331	0.36205502	0	2	6	FALSE	GLG1	1039	2	0	0	0.7797486		FALSE	0	GLG1	448854	0.50437318
3297	2.81536313	0	0.35519397	0	1	6	FALSE	TACC3	1969	1	0	0	0.77307961	mRNAup	FALSE	0	TACC3	0	0
3299	2.81536313	0	0.35519397	0	1	6	FALSE	OGDH	1969	1	0	0	0.77307961		FALSE	0	OGDH	0	0
3301	2.81536313	0	0.35519397	0	1	6	FALSE	PUM2	1969	1	0	0	0.77307961		FALSE	0	PUM2	0	0
3303	2.81536313	0	0.35519397	0	1	6	FALSE	NELFE	1969	1	0	0	0.77307961		FALSE	0	NELFE	0	0
3305	2.81312849	0.00223276	0.35547612	0	2	6	FALSE	TFG	986.5	2	0	0	0.77335894		FALSE	0	TFG	213232	0.5
3307	2.81536313	0	0.35519397	0	1	6	FALSE	ERGIC1	1969	1	0	0	0.77307961		FALSE	0	ERGIC1	0	0
3309	2.81536313	0	0.35519397	0	1	6	FALSE	SFXN1	1969	1	0	0	0.77307961		FALSE	0	SFXN1	0	0
3311	2.77597765	0.00609426	0.36023345	0	4	6	FALSE	UBQLN1	513.75	4	0	0	0.77800279		FALSE	0	UBQLN1	806720	0.25184185
3313	2.81536313	0	0.35519397	0	1	6	FALSE	DYNC1LI1	1969	1	0	0	0.77307961		FALSE	0	DYNC1LI1	0	0
3315	2.81536313	0	0.35519397	0	1	6	FALSE	STAG2	1969	1	0	0	0.77307961		FALSE	0	STAG2	0	0
3317	2.81536313	0	0.35519397	0	1	6	FALSE	PHB	1969	1	0	0	0.77307961		FALSE	0	PHB	0	0
3320	2.81536313	0	0.35519397	0	1	6	FALSE	MADD	1969	1	0	0	0.77307961		FALSE	0	MADD	0	0
3322	2.81536313	0	0.35519397	0	1	6	FALSE	POLA1	1969	1	0	0	0.77307961		FALSE	0	POLA1	0	0
3324	2.81536313	0	0.35519397	0	1	6	FALSE	VPS52	1969	1	0	0	0.77307961		FALSE	0	VPS52	0	0
3326	2.78687151	5.18E-04	0.3588253	0	2	6	FALSE	ARPC2	1024	2	0	0	0.77664106		FALSE	0	ARPC2	236884	0.50643564
3328	2.81536313	0	0.35519397	0	1	6	FALSE	RAP1GDS1	1969	1	0	0	0.77307961		FALSE	0	RAP1GDS1	0	0
3330	2.81536313	0	0.35519397	0	1	6	FALSE	RSL1D1	1969	1	0	0	0.77307961		FALSE	0	RSL1D1	0	0
3332	2.81536313	0	0.35519397	0	1	6	FALSE	HADHB	1969	1	0	0	0.77307961		FALSE	0	HADHB	0	0
3334	2.81536313	0	0.35519397	0	1	6	FALSE	UGP2	1969	1	0	0	0.77307961		FALSE	0	UGP2	0	0
3336	2.81536313	0	0.35519397	0	1	6	FALSE	HADHA	1969	1	0	0	0.77307961		FALSE	0	HADHA	0	0
3338	2.81536313	0	0.35519397	0	1	6	FALSE	ZNF574	1969	1	0	0	0.77307961		FALSE	0	ZNF574	0	0
3340	2.81536313	0	0.35519397	0	1	6	FALSE	ANKRD44	1969	1	0	0	0.77307961		FALSE	0	ANKRD44	0	0
3343	2.78687151	5.18E-04	0.3588253	0	2	6	FALSE	LAP3	1024	2	0	0	0.77664106		FALSE	0	LAP3	236884	0.50643564
3345	2.81536313	0	0.35519397	0	1	6	FALSE	AARS	1969	1	0	0	0.77307961		FALSE	0	AARS	0	0
3347	2.8122905	3.05E-04	0.35558204	0	2	6	FALSE	FBXL18	989	2	0	0	0.77346369		FALSE	0	FBXL18	26346	0.50076026
3349	2.78826816	0.00141214	0.35864556	0	2	6	FALSE	NDUFA9	1010.5	2	0	0	0.77646648		FALSE	0	NDUFA9	219098	0.50198906
3352	2.81536313	0	0.35519397	0	1	6	FALSE	INTS3	1969	1	0	0	0.77307961		FALSE	0	INTS3	0	0
3354	2.81536313	0	0.35519397	0	1	6	FALSE	MCM4	1969	1	0	0	0.77307961		FALSE	0	MCM4	0	0
3356	2.81536313	0	0.35519397	0	1	6	FALSE	INTS6	1969	1	0	0	0.77307961		FALSE	0	INTS6	0	0
3358	2.81536313	0	0.35519397	0	1	6	FALSE	ANK2	1969	1	0	0	0.77307961		FALSE	0	ANK2	0	0
3360	2.81536313	0	0.35519397	0	1	6	FALSE	CTBP1	1969	1	0	0	0.77307961		FALSE	0	CTBP1	0	0
3362	2.81536313	0	0.35519397	0	1	6	FALSE	CPNE3	1969	1	0	0	0.77307961		FALSE	0	CPNE3	0	0
3364	2.81536313	0	0.35519397	0	1	6	FALSE	RTL1	1969	1	0	0	0.77307961		FALSE	0	RTL1	0	0
3366	2.81536313	0	0.35519397	0	1	6	FALSE	VWA8	1969	1	0	0	0.77307961		FALSE	0	VWA8	0	0
3368	2.81536313	0	0.35519397	0	1	6	FALSE	PDE12	1969	1	0	0	0.77307961		FALSE	0	PDE12	0	0
3370	2.81536313	0	0.35519397	0	1	6	FALSE	KIF15	1969	1	0	0	0.77307961		FALSE	0	KIF15	0	0
3373	2.81536313	0	0.35519397	0	1	6	FALSE	VPS39	1969	1	0	0	0.77307961		FALSE	0	VPS39	0	0
3375	2.81536313	0	0.35519397	0	1	6	FALSE	ATP2B1	1969	1	0	0	0.77307961		FALSE	0	ATP2B1	0	0
3377	2.81536313	0	0.35519397	0	1	6	FALSE	CPNE1	1969	1	0	0	0.77307961		FALSE	0	CPNE1	0	0
3380	2.81536313	0	0.35519397	0	1	6	FALSE	HAUS6	1969	1	0	0	0.77307961		FALSE	0	HAUS6	0	0
3382	2.80083799	0	0.357036	1	2	6	FALSE	RASA1	1022	2	0	0	0.77489525		FALSE	0	RASA1	0	0.50594059
3385	2.81536313	0	0.35519397	0	1	6	FALSE	RIC8A	1969	1	0	0	0.77307961		FALSE	0	RIC8A	0	0
3387	2.81536313	0	0.35519397	0	1	6	FALSE	VDAC3	1969	1	0	0	0.77307961		FALSE	0	VDAC3	0	0
3389	2.81536313	0	0.35519397	0	1	6	FALSE	CNOT1	1969	1	0	0	0.77307961		FALSE	0	CNOT1	0	0
3391	2.78100559	9.31E-04	0.35958216	0	2	6	FALSE	ANKRD28	1023.5	2	0	0	0.7773743		FALSE	0	ANKRD28	279020	0.50419132
3393	2.81536313	0	0.35519397	0	1	6	FALSE	PIK3R4	1969	1	0	0	0.77307961		FALSE	0	PIK3R4	0	0
3395	2.73603352	4.02E-04	0.3654926	0	2	6	FALSE	VDAC1	1075	2	0	0	0.78299581		FALSE	0	VDAC1	386604	0.51609803
3397	2.81536313	0	0.35519397	0	1	6	FALSE	FTSJ3	1969	1	0	0	0.77307961		FALSE	0	FTSJ3	0	0
3399	2.73603352	4.02E-04	0.3654926	0	2	6	FALSE	ILF3	1075	2	0	0	0.78299581		FALSE	0	ILF3	386604	0.51609803
3401	2.81536313	0	0.35519397	0	1	6	FALSE	MAP4	1969	1	0	0	0.77307961		FALSE	0	MAP4	0	0
3403	2.81536313	0	0.35519397	0	1	6	FALSE	NEMF	1969	1	0	0	0.77307961		FALSE	0	NEMF	0	0
3406	2.81536313	0	0.35519397	0	1	6	FALSE	PDS5B	1969	1	0	0	0.77307961		FALSE	0	PDS5B	0	0
3408	2.81536313	0	0.35519397	0	1	6	FALSE	GSR	1969	1	0	0	0.77307961		FALSE	0	GSR	0	0
3410	2.81536313	0	0.35519397	0	1	6	FALSE	UFL1	1969	1	0	0	0.77307961		FALSE	0	UFL1	0	0
3412	2.81536313	0	0.35519397	0	1	6	FALSE	PDS5A	1969	1	0	0	0.77307961		FALSE	0	PDS5A	0	0
3414	2.81536313	0	0.35519397	0	1	6	FALSE	DCPS	1969	1	0	0	0.77307961		FALSE	0	DCPS	0	0
3416	2.81536313	0	0.35519397	0	1	6	FALSE	SRGAP2	1969	1	0	0	0.77307961		FALSE	0	SRGAP2	0	0
3418	2.81536313	0	0.35519397	0	1	6	FALSE	PCF11	1969	1	0	0	0.77307961		FALSE	0	PCF11	0	0
3420	2.81536313	0	0.35519397	0	1	6	FALSE	PCK2	1969	1	0	0	0.77307961		FALSE	0	PCK2	0	0
3422	2.81536313	0	0.35519397	0	1	6	FALSE	NPEPPS	1969	1	0	0	0.77307961		FALSE	0	NPEPPS	0	0
3424	2.81536313	0	0.35519397	0	1	6	FALSE	PTPN12	1969	1	0	0	0.77307961		FALSE	0	PTPN12	0	0
3427	2.81536313	0	0.35519397	0	1	6	FALSE	FMNL2	1969	1	0	0	0.77307961		FALSE	0	FMNL2	0	0
3429	2.73603352	4.02E-04	0.3654926	0	2	6	FALSE	PRPF8	1075	2	0	0	0.78299581		FALSE	0	PRPF8	386604	0.51609803
3431	2.81536313	0	0.35519397	0	1	6	FALSE	DIAPH1	1969	1	0	0	0.77307961		FALSE	0	DIAPH1	0	0
3433	2.81536313	0	0.35519397	0	1	6	FALSE	PRPF4	1969	1	0	0	0.77307961		FALSE	0	PRPF4	0	0
3435	2.81536313	0	0.35519397	0	1	6	FALSE	HIP1R	1969	1	0	0	0.77307961		FALSE	0	HIP1R	0	0
3437	2.81536313	0	0.35519397	0	1	6	FALSE	PAPSS1	1969	1	0	0	0.77307961		FALSE	0	PAPSS1	0	0
3439	2.81536313	0	0.35519397	0	1	6	FALSE	AQR	1969	1	0	0	0.77307961		FALSE	0	AQR	0	0
3441	2.81536313	0	0.35519397	0	1	6	FALSE	PAICS	1969	1	0	0	0.77307961		FALSE	0	PAICS	0	0
3443	2.81536313	0	0.35519397	0	1	6	FALSE	PNKP	1969	1	0	0	0.77307961		FALSE	0	PNKP	0	0
3445	2.81536313	0	0.35519397	0	1	6	FALSE	GTF3C3	1969	1	0	0	0.77307961		FALSE	0	GTF3C3	0	0
3447	2.81536313	0	0.35519397	0	1	6	FALSE	APPL2	1969	1	0	0	0.77307961		FALSE	0	APPL2	0	0
3449	2.81536313	0	0.35519397	0	1	6	FALSE	FANCD2	1969	1	0	0	0.77307961		FALSE	0	FANCD2	0	0
3452	2.81536313	0	0.35519397	0	1	6	FALSE	NELFCD	1969	1	0	0	0.77307961		FALSE	0	NELFCD	0	0
3454	2.81536313	0	0.35519397	0	1	6	FALSE	COPG1	1969	1	0	0	0.77307961		FALSE	0	COPG1	0	0
3456	2.68156425	0.00201808	0.37291667	0.3	5	6	FALSE	SNW1	481.4	5	0	0	0.78980447		FALSE	0	SNW1	746838	0.21395556
3458	2.81536313	0	0.35519397	0	1	6	FALSE	TRA2A	1969	1	0	0	0.77307961		FALSE	0	TRA2A	0	0
3460	2.81536313	0	0.35519397	0	1	6	FALSE	RRM1	1969	1	0	0	0.77307961		FALSE	0	RRM1	0	0
3462	2.81536313	0	0.35519397	0	1	6	FALSE	ACOT7	1969	1	0	0	0.77307961		FALSE	0	ACOT7	0	0
3464	2.81536313	0	0.35519397	0	1	6	FALSE	ADSL	1969	1	0	0	0.77307961		FALSE	0	ADSL	0	0
3466	2.81536313	0	0.35519397	0	1	6	FALSE	ACOT1	1969	1	0	0	0.77307961		FALSE	0	ACOT1	0	0
3468	2.81536313	0	0.35519397	0	1	6	FALSE	HNRNPA3	1969	1	0	0	0.77307961		FALSE	0	HNRNPA3	0	0
3470	2.81536313	0	0.35519397	0	1	6	FALSE	PANK4	1969	1	0	0	0.77307961		FALSE	0	PANK4	0	0
3472	2.81340782	4.57E-04	0.35544083	0	2	6	FALSE	HSP90AB1	987.5	2	0	0	0.77332402		FALSE	0	HSP90AB1	141096	0.50050736
3474	2.81536313	0	0.35519397	0	1	6	FALSE	NIPSNAP1	1969	1	0	0	0.77307961		FALSE	0	NIPSNAP1	0	0
3476	2.81536313	0	0.35519397	0	1	6	FALSE	HIST1H1C	1969	1	0	0	0.77307961		FALSE	0	HIST1H1C	0	0
3478	2.81536313	0	0.35519397	0	1	6	FALSE	ASCC3	1969	1	0	0	0.77307961		FALSE	0	ASCC3	0	0
3480	2.81536313	0	0.35519397	0	1	6	FALSE	PSMD14	1969	1	0	0	0.77307961		FALSE	0	PSMD14	0	0
3482	2.81536313	0	0.35519397	0	1	6	FALSE	NONO	1969	1	0	0	0.77307961		FALSE	0	NONO	0	0
3484	2.81536313	0	0.35519397	0	1	6	FALSE	ACAT2	1969	1	0	0	0.77307961		FALSE	0	ACAT2	0	0
3487	2.79273743	4.10E-04	0.35807161	0	2	6	FALSE	PUS7	1018.5	2	0	0	0.77590782		FALSE	0	PUS7	205482	0.50647088
3489	2.81536313	0	0.35519397	0	1	6	FALSE	DLGAP5	1969	1	0	0	0.77307961		FALSE	0	DLGAP5	0	0
3491	2.81536313	0	0.35519397	0	1	6	FALSE	CCDC47	1969	1	0	0	0.77307961		FALSE	0	CCDC47	0	0
3493	2.81536313	0	0.35519397	0	1	6	FALSE	CAPZA1	1969	1	0	0	0.77307961		FALSE	0	CAPZA1	0	0
3495	2.81536313	0	0.35519397	0	1	6	FALSE	MRI1	1969	1	0	0	0.77307961		FALSE	0	MRI1	0	0
3497	2.81536313	0	0.35519397	0	1	6	FALSE	SSB	1969	1	0	0	0.77307961		FALSE	0	SSB	0	0
3499	2.81536313	0	0.35519397	0	1	6	FALSE	SF3B1	1969	1	0	0	0.77307961		FALSE	0	SF3B1	0	0
3502	2.81536313	0	0.35519397	0	1	6	FALSE	SMEK1	1969	1	0	0	0.77307961		FALSE	0	SMEK1	0	0
3504	2.81536313	0	0.35519397	0	1	6	FALSE	HSPA9	1969	1	0	0	0.77307961		FALSE	0	HSPA9	0	0
3506	2.81536313	0	0.35519397	0	1	6	FALSE	EEF1G	1969	1	0	0	0.77307961		FALSE	0	EEF1G	0	0
3508	2.77122905	8.13E-04	0.36085072	0	3	6	FALSE	DDB1	701	3	0	0	0.77859637		FALSE	0	DDB1	346088	0.34146341
3510	2.78826816	0.00141214	0.35864556	0	2	6	FALSE	ABCD3	1010.5	2	0	0	0.77646648		FALSE	0	ABCD3	219098	0.50198906
3512	2.81536313	0	0.35519397	0	1	6	FALSE	C7orf50	1969	1	0	0	0.77307961		FALSE	0	C7orf50	0	0
3514	2.81536313	0	0.35519397	0	1	6	FALSE	EHD4	1969	1	0	0	0.77307961		FALSE	0	EHD4	0	0
3516	2.8103352	2.86E-04	0.35582944	0	2	6	FALSE	MRPL39	993	2	0	0	0.7737081		FALSE	0	MRPL39	41126	0.50177036
3518	2.81536313	0	0.35519397	0	1	6	FALSE	ABCD2	1969	1	0	0	0.77307961		FALSE	0	ABCD2	0	0
3520	2.81536313	0	0.35519397	0	1	6	FALSE	GTF2I	1969	1	0	0	0.77307961		FALSE	0	GTF2I	0	0
3522	2.81536313	0	0.35519397	0	1	6	FALSE	RAB3GAP2	1969	1	0	0	0.77307961		FALSE	0	RAB3GAP2	0	0
3524	2.81536313	0	0.35519397	0	1	6	FALSE	PIK3CB	1969	1	0	0	0.77307961		FALSE	0	PIK3CB	0	0
3526	2.81536313	0	0.35519397	0	1	6	FALSE	GART	1969	1	0	0	0.77307961		FALSE	0	GART	0	0
3528	2.81536313	0	0.35519397	0	1	6	FALSE	ZNF316	1969	1	0	0	0.77307961		FALSE	0	ZNF316	0	0
3530	2.81536313	0	0.35519397	0	1	6	FALSE	RAB3GAP1	1969	1	0	0	0.77307961		FALSE	0	RAB3GAP1	0	0
3532	2.81536313	0	0.35519397	0	1	6	FALSE	RPL7A	1969	1	0	0	0.77307961		FALSE	0	RPL7A	0	0
3534	2.73603352	4.02E-04	0.3654926	0	2	6	FALSE	STAU1	1075	2	0	0	0.78299581		FALSE	0	STAU1	386604	0.51609803
3536	2.81536313	0	0.35519397	0	1	6	FALSE	PYGB	1969	1	0	0	0.77307961		FALSE	0	PYGB	0	0
3538	2.81536313	0	0.35519397	0	1	6	FALSE	ALDH2	1969	1	0	0	0.77307961		FALSE	0	ALDH2	0	0
3541	2.81536313	0	0.35519397	0	1	6	FALSE	ELAVL3	1969	1	0	0	0.77307961		FALSE	0	ELAVL3	0	0
3543	2.81536313	0	0.35519397	0	1	6	FALSE	TCOF1	1969	1	0	0	0.77307961		FALSE	0	TCOF1	0	0
3545	2.67569832	0.0032608	0.37373421	0	8	6	FALSE	MOV10	291.5	8	0	0	0.79053771		FALSE	0	MOV10	1007574	0.13289113
3547	2.79162011	3.79E-04	0.35821493	0	2	6	FALSE	NPLOC4	1020	2	0	0	0.77604749		FALSE	0	NPLOC4	201164	0.50696517
3549	2.81536313	0	0.35519397	0	1	6	FALSE	FSD1	1969	1	0	0	0.77307961		FALSE	0	FSD1	0	0
3551	2.81536313	0	0.35519397	0	1	6	FALSE	SND1	1969	1	0	0	0.77307961		FALSE	0	SND1	0	0
3553	2.81536313	0	0.35519397	0	1	6	FALSE	INPP4A	1969	1	0	0	0.77307961		FALSE	0	INPP4A	0	0
3555	2.79888268	7.40E-04	0.35728543	0	3	6	FALSE	MAP3K1	673	3	0	0	0.77513966		FALSE	0	MAP3K1	140256	0.33650476
3557	2.7273743	9.18E-04	0.36665301	0	3	6	FALSE	HSPA1A	726	3	0	0	0.78407821		FALSE	0	HSPA1A	683044	0.34589695
3559	2.8103352	2.86E-04	0.35582944	0	2	6	FALSE	MRPL28	993	2	0	0	0.7737081		FALSE	0	MRPL28	41126	0.50177036
3561	2.81536313	0	0.35519397	0	1	6	FALSE	NUP54	1969	1	0	0	0.77307961		FALSE	0	NUP54	0	0
3563	2.81536313	0	0.35519397	0	1	6	FALSE	STRN3	1969	1	0	0	0.77307961		FALSE	0	STRN3	0	0
3565	2.81536313	0	0.35519397	0	1	6	FALSE	WDR36	1969	1	0	0	0.77307961		FALSE	0	WDR36	0	0
3567	2.81536313	0	0.35519397	0	1	6	FALSE	ABCB1	1969	1	0	0	0.77307961		FALSE	0	ABCB1	0	0
3569	2.81536313	0	0.35519397	0	1	6	FALSE	CTNNA2	1969	1	0	0	0.77307961		FALSE	0	CTNNA2	0	0
3571	2.81536313	0	0.35519397	0	1	6	FALSE	PROX1	1969	1	0	0	0.77307961	mRNAup	FALSE	0	PROX1	0	0
3573	2.81536313	0	0.35519397	0	1	6	FALSE	ADNP	1969	1	0	0	0.77307961		FALSE	0	ADNP	0	0
3575	2.81536313	0	0.35519397	0	1	6	FALSE	SAP30BP	1969	1	0	0	0.77307961		FALSE	0	SAP30BP	0	0
3577	2.79832402	7.59E-04	0.35735676	0	2	6	FALSE	MTA2	1005	2	0	0	0.7752095		FALSE	0	MTA2	449946	0.5025025
3579	2.80391061	4.65E-04	0.35664475	0	2	6	FALSE	PGM2	1001	2	0	0	0.77451117		FALSE	0	PGM2	103218	0.50301811
3581	2.81536313	0	0.35519397	0	1	6	FALSE	PSMC3	1969	1	0	0	0.77307961		FALSE	0	PSMC3	0	0
3583	2.81536313	0	0.35519397	0	1	6	FALSE	HNRNPLL	1969	1	0	0	0.77307961		FALSE	0	HNRNPLL	0	0
3585	2.81536313	0	0.35519397	0	1	6	FALSE	EIF4G1	1969	1	0	0	0.77307961		FALSE	0	EIF4G1	0	0
3588	2.80502793	0	0.35650269	1	2	6	FALSE	MARK3	1012.5	2	0	0	0.77437151		FALSE	0	MARK3	0	0.505997
3590	2.80670391	3.41E-04	0.35628981	0	2	6	FALSE	WWP2	997.5	2	0	0	0.77416201		FALSE	0	WWP2	70338	0.50226815
3592	2.81536313	0	0.35519397	0	1	6	FALSE	EXOSC9	1969	1	0	0	0.77307961		FALSE	0	EXOSC9	0	0
3594	2.74497207	0.00109806	0.36430243	0	2	6	FALSE	TTN	1034.5	2	0	0	0.78187849		FALSE	0	TTN	299696	0.50439239
3596	2.81536313	0	0.35519397	0	1	6	FALSE	SYT4	1969	1	0	0	0.77307961		FALSE	0	SYT4	0	0
3598	2.81536313	0	0.35519397	0	1	6	FALSE	SRSF1	1969	1	0	0	0.77307961		FALSE	0	SRSF1	0	0
3602	2.81536313	0	0.35519397	0	1	6	FALSE	ABCC1	1969	1	0	0	0.77307961		FALSE	0	ABCC1	0	0
3604	2.81536313	0	0.35519397	0	1	6	FALSE	DYRK1A	1969	1	0	0	0.77307961		FALSE	0	DYRK1A	0	0
3607	2.81536313	0	0.35519397	0	1	6	FALSE	EPHA2	1969	1	0	0	0.77307961		FALSE	0	EPHA2	0	0
3609	2.81536313	0	0.35519397	0	1	6	FALSE	SPTBN1	1969	1	0	0	0.77307961		FALSE	0	SPTBN1	0	0
3611	2.81536313	0	0.35519397	0	1	6	FALSE	SRSF9	1969	1	0	0	0.77307961		FALSE	0	SRSF9	0	0
3613	2.81536313	0	0.35519397	0	1	6	FALSE	XPR1	1969	1	0	0	0.77307961		FALSE	0	XPR1	0	0
3615	2.81536313	0	0.35519397	0	1	6	FALSE	ZNF629	1969	1	0	0	0.77307961		FALSE	0	ZNF629	0	0
3617	2.81536313	0	0.35519397	0	1	6	FALSE	VPS33B	1969	1	0	0	0.77307961		FALSE	0	VPS33B	0	0
3619	2.81536313	0	0.35519397	0	1	6	FALSE	LTA4H	1969	1	0	0	0.77307961		FALSE	0	LTA4H	0	0
3621	2.81536313	0	0.35519397	0	1	6	FALSE	GPATCH4	1969	1	0	0	0.77307961		FALSE	0	GPATCH4	0	0
3623	2.78156425	6.73E-04	0.35950994	0	3	6	FALSE	GTF2F2	690.6666667	3	0	0	0.77730447		FALSE	0	GTF2F2	284918	0.33990471
3625	2.81536313	0	0.35519397	0	1	6	FALSE	PIAS2	1969	1	0	0	0.77307961		FALSE	0	PIAS2	0	0
3627	2.81536313	0	0.35519397	0	1	6	FALSE	ASAP2	1969	1	0	0	0.77307961		FALSE	0	ASAP2	0	0
3629	2.81536313	0	0.35519397	0	1	6	FALSE	URGCP	1969	1	0	0	0.77307961		FALSE	0	URGCP	0	0
3631	2.81536313	0	0.35519397	0	1	6	FALSE	EIF4B	1969	1	0	0	0.77307961		FALSE	0	EIF4B	0	0
3633	2.81536313	0	0.35519397	0	1	6	FALSE	UBE3C	1969	1	0	0	0.77307961		FALSE	0	UBE3C	0	0
3635	2.74497207	0.00109806	0.36430243	0	2	6	FALSE	SYNPO2	1034.5	2	0	0	0.78187849		FALSE	0	SYNPO2	299696	0.50439239
3637	2.81536313	0	0.35519397	0	1	6	FALSE	PPM1G	1969	1	0	0	0.77307961		FALSE	0	PPM1G	0	0
3639	2.81536313	0	0.35519397	0	1	6	FALSE	CERK	1969	1	0	0	0.77307961		FALSE	0	CERK	0	0
3641	2.81536313	0	0.35519397	0	1	6	FALSE	AKAP1	1969	1	0	0	0.77307961		FALSE	0	AKAP1	0	0
3643	2.81536313	0	0.35519397	0	1	6	FALSE	NUMA1	1969	1	0	0	0.77307961		FALSE	0	NUMA1	0	0
3645	2.81536313	0	0.35519397	0	1	6	FALSE	DCK	1969	1	0	0	0.77307961		FALSE	0	DCK	0	0
3647	2.81536313	0	0.35519397	0	1	6	FALSE	RBM14	1969	1	0	0	0.77307961		FALSE	0	RBM14	0	0
3649	2.81536313	0	0.35519397	0	1	6	FALSE	RBM15	1969	1	0	0	0.77307961		FALSE	0	RBM15	0	0
3651	2.81536313	0	0.35519397	0	1	6	FALSE	TRAPPC9	1969	1	0	0	0.77307961		FALSE	0	TRAPPC9	0	0
3653	2.81536313	0	0.35519397	0	1	6	FALSE	SLC16A1	1969	1	0	0	0.77307961		FALSE	0	SLC16A1	0	0
3655	2.81536313	0	0.35519397	0	1	6	FALSE	C16orf62	1969	1	0	0	0.77307961		FALSE	0	C16orf62	0	0
3657	2.81536313	0	0.35519397	0	1	6	FALSE	LTN1	1969	1	0	0	0.77307961		FALSE	0	LTN1	0	0
3659	2.73603352	4.02E-04	0.3654926	0	2	6	FALSE	TXNRD1	1075	2	0	0	0.78299581		FALSE	0	TXNRD1	386604	0.51609803
3661	2.81536313	0	0.35519397	0	1	6	FALSE	MYO1B	1969	1	0	0	0.77307961		FALSE	0	MYO1B	0	0
3663	2.81536313	0	0.35519397	0	1	6	FALSE	CLTA	1969	1	0	0	0.77307961		FALSE	0	CLTA	0	0
3665	2.73603352	4.02E-04	0.3654926	0	2	6	FALSE	DNAJB11	1075	2	0	0	0.78299581		FALSE	0	DNAJB11	386604	0.51609803
3667	2.81536313	0	0.35519397	0	1	6	FALSE	MRPS2	1969	1	0	0	0.77307961		FALSE	0	MRPS2	0	0
3669	2.71424581	9.24E-04	0.36842647	0	3	6	FALSE	EPB41	739.3333333	3	0	0	0.78571927		FALSE	0	EPB41	625062	0.34810624
3671	2.81536313	0	0.35519397	0	1	6	FALSE	NCAPD2	1969	1	0	0	0.77307961		FALSE	0	NCAPD2	0	0
3673	2.81536313	0	0.35519397	0	1	6	FALSE	DNAJC7	1969	1	0	0	0.77307961		FALSE	0	DNAJC7	0	0
3675	2.81536313	0	0.35519397	0	1	6	FALSE	VCPIP1	1969	1	0	0	0.77307961		FALSE	0	VCPIP1	0	0
3677	2.81536313	0	0.35519397	0	1	6	FALSE	MRPS5	1969	1	0	0	0.77307961		FALSE	0	MRPS5	0	0
3679	2.81536313	0	0.35519397	0	1	6	FALSE	FSCN1	1969	1	0	0	0.77307961		FALSE	0	FSCN1	0	0
3681	2.81536313	0	0.35519397	0	1	6	FALSE	EIF3L	1969	1	0	0	0.77307961		FALSE	0	EIF3L	0	0
3683	2.81536313	0	0.35519397	0	1	6	FALSE	MRPS9	1969	1	0	0	0.77307961		FALSE	0	MRPS9	0	0
3686	2.81536313	0	0.35519397	0	1	6	FALSE	UBR1	1969	1	0	0	0.77307961		FALSE	0	UBR1	0	0
3688	2.81536313	0	0.35519397	0	1	6	FALSE	UNC45A	1969	1	0	0	0.77307961		FALSE	0	UNC45A	0	0
3691	2.81536313	0	0.35519397	0	1	6	FALSE	ETFB	1969	1	0	0	0.77307961		FALSE	0	ETFB	0	0
3693	2.81536313	0	0.35519397	0	1	6	FALSE	PLS3	1969	1	0	0	0.77307961		FALSE	0	PLS3	0	0
3695	2.81536313	0	0.35519397	0	1	6	FALSE	ST13	1969	1	0	0	0.77307961		FALSE	0	ST13	0	0
3697	2.81536313	0	0.35519397	0	1	6	FALSE	ANXA2	1969	1	0	0	0.77307961		FALSE	0	ANXA2	0	0
3699	2.73603352	4.02E-04	0.3654926	0	2	6	FALSE	TUBGCP2	1075	2	0	0	0.78299581		FALSE	0	TUBGCP2	386604	0.51609803
3701	2.81536313	0	0.35519397	0	1	6	FALSE	RPLP0	1969	1	0	0	0.77307961		FALSE	0	RPLP0	0	0
3703	2.81536313	0	0.35519397	0	1	6	FALSE	RPN1	1969	1	0	0	0.77307961		FALSE	0	RPN1	0	0
3705	2.81536313	0	0.35519397	0	1	6	FALSE	GFM1	1969	1	0	0	0.77307961		FALSE	0	GFM1	0	0
3707	2.81536313	0	0.35519397	0	1	6	FALSE	PDXDC1	1969	1	0	0	0.77307961		FALSE	0	PDXDC1	0	0
3709	2.81536313	0	0.35519397	0	1	6	FALSE	OPA1	1969	1	0	0	0.77307961		FALSE	0	OPA1	0	0
3711	2.79162011	3.79E-04	0.35821493	0	2	6	FALSE	STAT5B	1020	2	0	0	0.77604749		FALSE	0	STAT5B	201164	0.50696517
3713	2.76201117	0.00136331	0.36205502	0	2	6	FALSE	LAMB1	1039	2	0	0	0.7797486		FALSE	0	LAMB1	448854	0.50437318
3716	2.81536313	0	0.35519397	0	1	6	FALSE	HNRNPDL	1969	1	0	0	0.77307961		FALSE	0	HNRNPDL	0	0
3718	2.81536313	0	0.35519397	0	1	6	FALSE	RNMT	1969	1	0	0	0.77307961		FALSE	0	RNMT	0	0
3720	2.81536313	0	0.35519397	0	1	6	FALSE	SYNE1	1969	1	0	0	0.77307961		FALSE	0	SYNE1	0	0
3722	2.81536313	0	0.35519397	0	1	6	FALSE	PCDHGC3	1969	1	0	0	0.77307961		FALSE	0	PCDHGC3	0	0
3725	2.81536313	0	0.35519397	0	1	6	FALSE	GNAS	1969	1	0	0	0.77307961		FALSE	0	GNAS	0	0
3727	2.81536313	0	0.35519397	0	1	6	FALSE	GDAP1	1969	1	0	0	0.77307961		FALSE	0	GDAP1	0	0
3729	2.81536313	0	0.35519397	0	1	6	FALSE	IDH1	1969	1	0	0	0.77307961		FALSE	0	IDH1	0	0
3731	2.81536313	0	0.35519397	0	1	6	FALSE	RBM39	1969	1	0	0	0.77307961		FALSE	0	RBM39	0	0
3733	2.81536313	0	0.35519397	0	1	6	FALSE	GFPT1	1969	1	0	0	0.77307961		FALSE	0	GFPT1	0	0
3735	2.81536313	0	0.35519397	0	1	6	FALSE	FAM171A1	1969	1	0	0	0.77307961		FALSE	0	FAM171A1	0	0
3737	2.81536313	0	0.35519397	0	1	6	FALSE	TLN1	1969	1	0	0	0.77307961		FALSE	0	TLN1	0	0
3739	2.81536313	0	0.35519397	0	1	6	FALSE	TPR	1969	1	0	0	0.77307961		FALSE	0	TPR	0	0
3741	2.79189944	5.33E-04	0.35817909	0	2	6	FALSE	GAB2	1013.5	2	0	0	0.77601257		FALSE	0	GAB2	169564	0.5044843
3743	2.81536313	0	0.35519397	0	1	6	FALSE	UCHL1	1969	1	0	0	0.77307961		FALSE	0	UCHL1	0	0
3745	2.81536313	0	0.35519397	0	1	6	FALSE	VAT1	1969	1	0	0	0.77307961		FALSE	0	VAT1	0	0
3747	2.81536313	0	0.35519397	0	1	6	FALSE	KCNH2	1969	1	0	0	0.77307961		FALSE	0	KCNH2	0	0
3749	2.81536313	0	0.35519397	0	1	6	FALSE	OSBP	1969	1	0	0	0.77307961		FALSE	0	OSBP	0	0
3751	2.81536313	0	0.35519397	0	1	6	FALSE	TTI1	1969	1	0	0	0.77307961		FALSE	0	TTI1	0	0
3753	2.81536313	0	0.35519397	0	1	6	FALSE	RHOT2	1969	1	0	0	0.77307961		FALSE	0	RHOT2	0	0
3755	2.81536313	0	0.35519397	0	1	6	FALSE	AIFM1	1969	1	0	0	0.77307961		FALSE	0	AIFM1	0	0
3757	2.81536313	0	0.35519397	0	1	6	FALSE	ZNF497	1969	1	0	0	0.77307961		FALSE	0	ZNF497	0	0
3759	2.81536313	0	0.35519397	0	1	6	FALSE	PCDHB3	1969	1	0	0	0.77307961		FALSE	0	PCDHB3	0	0
3761	2.81536313	0	0.35519397	0	1	6	FALSE	ARAP3	1969	1	0	0	0.77307961		FALSE	0	ARAP3	0	0
3763	2.81536313	0	0.35519397	0	1	6	FALSE	NAE1	1969	1	0	0	0.77307961		FALSE	0	NAE1	0	0
3765	2.81536313	0	0.35519397	0	1	6	FALSE	SPTAN1	1969	1	0	0	0.77307961		FALSE	0	SPTAN1	0	0
3767	2.79134078	4.52E-04	0.35825078	0	2	6	FALSE	ARHGDIA	1017	2	0	0	0.7760824		FALSE	0	ARHGDIA	193552	0.50547264
3769	2.81536313	0	0.35519397	0	1	6	FALSE	SEZ6L2	1969	1	0	0	0.77307961		FALSE	0	SEZ6L2	0	0
3771	2.81536313	0	0.35519397	0	1	6	FALSE	TBCD	1969	1	0	0	0.77307961		FALSE	0	TBCD	0	0
3773	2.81480447	1.35E-04	0.35526446	0	2	6	FALSE	LGALS3BP	986.5	2	0	0	0.77314944		FALSE	0	LGALS3BP	50236	0.5007622
3775	2.81536313	0	0.35519397	0	1	6	FALSE	ARIH2	1969	1	0	0	0.77307961		FALSE	0	ARIH2	0	0
3777	2.81536313	0	0.35519397	0	1	6	FALSE	KLC1	1969	1	0	0	0.77307961		FALSE	0	KLC1	0	0
3780	2.81536313	0	0.35519397	0	1	6	FALSE	MEPCE	1969	1	0	0	0.77307961		FALSE	0	MEPCE	0	0
3782	2.81536313	0	0.35519397	0	1	6	FALSE	SBNO1	1969	1	0	0	0.77307961		FALSE	0	SBNO1	0	0
3784	2.81536313	0	0.35519397	0	1	6	FALSE	LCN1	1969	1	0	0	0.77307961		FALSE	0	LCN1	0	0
3787	2.81536313	0	0.35519397	0	1	6	FALSE	CLPB	1969	1	0	0	0.77307961		FALSE	0	CLPB	0	0
3789	2.81536313	0	0.35519397	0	1	6	FALSE	WDR70	1969	1	0	0	0.77307961		FALSE	0	WDR70	0	0
3791	2.81536313	0	0.35519397	0	1	6	FALSE	MGEA5	1969	1	0	0	0.77307961		FALSE	0	MGEA5	0	0
3793	2.81536313	0	0.35519397	0	1	6	FALSE	WAPAL	1969	1	0	0	0.77307961		FALSE	0	WAPAL	0	0
3795	2.81536313	0	0.35519397	0	1	6	FALSE	RHOT1	1969	1	0	0	0.77307961		FALSE	0	RHOT1	0	0
3797	2.81536313	0	0.35519397	0	1	6	FALSE	PATL1	1969	1	0	0	0.77307961		FALSE	0	PATL1	0	0
3800	2.74804469	0.00140395	0.3638951	0.33333333	4	6	FALSE	NSF	547	4	0	0	0.78149441		FALSE	0	NSF	465418	0.25949217
3802	2.81536313	0	0.35519397	0	1	6	FALSE	IK	1969	1	0	0	0.77307961		FALSE	0	IK	0	0
3805	2.79273743	4.10E-04	0.35807161	0	2	6	FALSE	LRRC47	1018.5	2	0	0	0.77590782		FALSE	0	LRRC47	205482	0.50647088
3807	2.81536313	0	0.35519397	0	1	6	FALSE	PHKB	1969	1	0	0	0.77307961		FALSE	0	PHKB	0	0
3810	2.81284916	0	0.35551142	1	2	6	FALSE	KIF2A	991.5	2	0	0	0.77339385		FALSE	0	KIF2A	0	0.50151745
3812	2.80502793	0	0.35650269	1	2	6	FALSE	PA2G4	1012.5	2	0	0	0.77437151		FALSE	0	PA2G4	0	0.505997
3814	2.71312849	0.00108865	0.36857819	0	3	6	FALSE	HNRNPK	736	3	0	0	0.78585894		FALSE	0	HNRNPK	582970	0.34686173
3816	2.81536313	0	0.35519397	0	1	6	FALSE	EPN1	1969	1	0	0	0.77307961		FALSE	0	EPN1	0	0
3818	2.79134078	4.52E-04	0.35825078	0	2	6	FALSE	CSNK1E	1017	2	0	0	0.7760824		FALSE	0	CSNK1E	193552	0.50547264
3820	2.76201117	0.00136331	0.36205502	0	2	6	FALSE	PXDN	1039	2	0	0	0.7797486	mRNAup	FALSE	0	PXDN	448854	0.50437318
3822	2.81536313	0	0.35519397	0	1	6	FALSE	WDR59	1969	1	0	0	0.77307961		FALSE	0	WDR59	0	0
3824	2.81536313	0	0.35519397	0	1	6	FALSE	NACA	1969	1	0	0	0.77307961		FALSE	0	NACA	0	0
3826	2.79273743	4.10E-04	0.35807161	0	2	6	FALSE	SAFB	1018.5	2	0	0	0.77590782		FALSE	0	SAFB	205482	0.50647088
3828	2.81536313	0	0.35519397	0	1	6	FALSE	CAPN7	1969	1	0	0	0.77307961		FALSE	0	CAPN7	0	0
3830	2.81536313	0	0.35519397	0	1	6	FALSE	RPS25	1969	1	0	0	0.77307961		FALSE	0	RPS25	0	0
3832	2.81536313	0	0.35519397	0	1	6	FALSE	GNL3	1969	1	0	0	0.77307961		FALSE	0	GNL3	0	0
3834	2.78687151	5.18E-04	0.3588253	0	2	6	FALSE	DNM2	1024	2	0	0	0.77664106		FALSE	0	DNM2	236884	0.50643564
3836	2.81536313	0	0.35519397	0	1	6	FALSE	HK2	1969	1	0	0	0.77307961		FALSE	0	HK2	0	0
3838	2.81536313	0	0.35519397	0	1	6	FALSE	SMC4	1969	1	0	0	0.77307961		FALSE	0	SMC4	0	0
3840	2.81536313	0	0.35519397	0	1	6	FALSE	SMC2	1969	1	0	0	0.77307961		FALSE	0	SMC2	0	0
3842	2.81536313	0	0.35519397	0	1	6	FALSE	HNRNPH3	1969	1	0	0	0.77307961		FALSE	0	HNRNPH3	0	0
3844	2.71424581	9.24E-04	0.36842647	0	3	6	FALSE	SRRM2	739.3333333	3	0	0	0.78571927		FALSE	0	SRRM2	625062	0.34810624
3846	2.81536313	0	0.35519397	0	1	6	FALSE	SRP54	1969	1	0	0	0.77307961		FALSE	0	SRP54	0	0
3848	2.81536313	0	0.35519397	0	1	6	FALSE	RANBP1	1969	1	0	0	0.77307961		FALSE	0	RANBP1	0	0
3850	2.81536313	0	0.35519397	0	1	6	FALSE	ME2	1969	1	0	0	0.77307961		FALSE	0	ME2	0	0
3852	2.81536313	0	0.35519397	0	1	6	FALSE	CDC73	1969	1	0	0	0.77307961		FALSE	0	CDC73	0	0
3855	2.81536313	0	0.35519397	0	1	6	FALSE	CLNS1A	1969	1	0	0	0.77307961		FALSE	0	CLNS1A	0	0
3857	2.81536313	0	0.35519397	0	1	6	FALSE	GBA	1969	1	0	0	0.77307961		FALSE	0	GBA	0	0
3859	2.81536313	0	0.35519397	0	1	6	FALSE	RHOBTB3	1969	1	0	0	0.77307961		FALSE	0	RHOBTB3	0	0
3861	2.81536313	0	0.35519397	0	1	6	FALSE	COLGALT1	1969	1	0	0	0.77307961		FALSE	0	COLGALT1	0	0
3864	2.81536313	0	0.35519397	0	1	6	FALSE	ARGLU1	1969	1	0	0	0.77307961		FALSE	0	ARGLU1	0	0
3866	2.81536313	0	0.35519397	0	1	6	FALSE	KIF4A	1969	1	0	0	0.77307961		FALSE	0	KIF4A	0	0
3868	2.81536313	0	0.35519397	0	1	6	FALSE	ACSL3	1969	1	0	0	0.77307961		FALSE	0	ACSL3	0	0
3870	2.81536313	0	0.35519397	0	1	6	FALSE	IPO5	1969	1	0	0	0.77307961		FALSE	0	IPO5	0	0
3872	2.81536313	0	0.35519397	0	1	6	FALSE	SARS	1969	1	0	0	0.77307961		FALSE	0	SARS	0	0
3874	2.81536313	0	0.35519397	0	1	6	FALSE	TXLNG	1969	1	0	0	0.77307961		FALSE	0	TXLNG	0	0
3876	2.81536313	0	0.35519397	0	1	6	FALSE	RPL3	1969	1	0	0	0.77307961		FALSE	0	RPL3	0	0
3878	2.81536313	0	0.35519397	0	1	6	FALSE	EIF6	1969	1	0	0	0.77307961		FALSE	0	EIF6	0	0
3880	2.81536313	0	0.35519397	0	1	6	FALSE	PLAA	1969	1	0	0	0.77307961		FALSE	0	PLAA	0	0
3882	2.81536313	0	0.35519397	0	1	6	FALSE	PPP2R5D	1969	1	0	0	0.77307961		FALSE	0	PPP2R5D	0	0
3884	2.73603352	4.02E-04	0.3654926	0	2	6	FALSE	PKM	1075	2	0	0	0.78299581		FALSE	0	PKM	386604	0.51609803
3886	2.81536313	0	0.35519397	0	1	6	FALSE	TNKS1BP1	1969	1	0	0	0.77307961		FALSE	0	TNKS1BP1	0	0
3888	2.81536313	0	0.35519397	0	1	6	FALSE	FASN	1969	1	0	0	0.77307961		FALSE	0	FASN	0	0
3890	2.81536313	0	0.35519397	0	1	6	FALSE	NOC2L	1969	1	0	0	0.77307961		FALSE	0	NOC2L	0	0
3892	2.81536313	0	0.35519397	0	1	6	FALSE	STRN	1969	1	0	0	0.77307961		FALSE	0	STRN	0	0
3894	2.81536313	0	0.35519397	0	1	6	FALSE	SLC3A2	1969	1	0	0	0.77307961		FALSE	0	SLC3A2	0	0
3896	2.81536313	0	0.35519397	0	1	6	FALSE	BCLAF1	1969	1	0	0	0.77307961		FALSE	0	BCLAF1	0	0
3898	2.81536313	0	0.35519397	0	1	6	FALSE	ELP3	1969	1	0	0	0.77307961		FALSE	0	ELP3	0	0
3900	2.81536313	0	0.35519397	0	1	6	FALSE	ATL2	1969	1	0	0	0.77307961		FALSE	0	ATL2	0	0
3902	2.81536313	0	0.35519397	0	1	6	FALSE	KIF5B	1969	1	0	0	0.77307961		FALSE	0	KIF5B	0	0
3904	2.81536313	0	0.35519397	0	1	6	FALSE	UQCRC2	1969	1	0	0	0.77307961		FALSE	0	UQCRC2	0	0
3906	2.81536313	0	0.35519397	0	1	6	FALSE	MFN2	1969	1	0	0	0.77307961		FALSE	0	MFN2	0	0
3908	2.81536313	0	0.35519397	0	1	6	FALSE	DPYSL3	1969	1	0	0	0.77307961		FALSE	0	DPYSL3	0	0
3910	2.81536313	0	0.35519397	0	1	6	FALSE	CEP97	1969	1	0	0	0.77307961		FALSE	0	CEP97	0	0
3912	2.79162011	3.79E-04	0.35821493	0	2	6	FALSE	SAE1	1020	2	0	0	0.77604749		FALSE	0	SAE1	201164	0.50696517
3914	2.79162011	3.79E-04	0.35821493	0	2	6	FALSE	DPP9	1020	2	0	0	0.77604749		FALSE	0	DPP9	201164	0.50696517
3916	2.81536313	0	0.35519397	0	1	6	FALSE	RPL9	1969	1	0	0	0.77307961		FALSE	0	RPL9	0	0
3918	2.81536313	0	0.35519397	0	1	6	FALSE	TMEM131	1969	1	0	0	0.77307961		FALSE	0	TMEM131	0	0
3920	2.81536313	0	0.35519397	0	1	6	FALSE	NOC3L	1969	1	0	0	0.77307961		FALSE	0	NOC3L	0	0
3922	2.81536313	0	0.35519397	0	1	6	FALSE	PRIM2	1969	1	0	0	0.77307961		FALSE	0	PRIM2	0	0
3924	2.81536313	0	0.35519397	0	1	6	FALSE	NCAM1	1969	1	0	0	0.77307961		FALSE	0	NCAM1	0	0
3926	2.73603352	4.02E-04	0.3654926	0	2	6	FALSE	MAP1A	1075	2	0	0	0.78299581		FALSE	0	MAP1A	386604	0.51609803
3928	2.81536313	0	0.35519397	0	1	6	FALSE	EML5	1969	1	0	0	0.77307961		FALSE	0	EML5	0	0
3930	2.81536313	0	0.35519397	0	1	6	FALSE	DDX23	1969	1	0	0	0.77307961		FALSE	0	DDX23	0	0
3932	2.81536313	0	0.35519397	0	1	6	FALSE	DHX15	1969	1	0	0	0.77307961		FALSE	0	DHX15	0	0
3934	2.81536313	0	0.35519397	0	1	6	FALSE	DDX21	1969	1	0	0	0.77307961		FALSE	0	DDX21	0	0
3936	2.81536313	0	0.35519397	0	1	6	FALSE	DHX16	1969	1	0	0	0.77307961		FALSE	0	DHX16	0	0
3938	2.81536313	0	0.35519397	0	1	6	FALSE	LETM1	1969	1	0	0	0.77307961		FALSE	0	LETM1	0	0
3940	2.81536313	0	0.35519397	0	1	6	FALSE	VAV2	1969	1	0	0	0.77307961		FALSE	0	VAV2	0	0
3943	2.81536313	0	0.35519397	0	1	6	FALSE	LANCL1	1969	1	0	0	0.77307961		FALSE	0	LANCL1	0	0
3945	2.81536313	0	0.35519397	0	1	6	FALSE	EXOC1	1969	1	0	0	0.77307961		FALSE	0	EXOC1	0	0
3947	2.81536313	0	0.35519397	0	1	6	FALSE	DDX20	1969	1	0	0	0.77307961		FALSE	0	DDX20	0	0
3949	2.81536313	0	0.35519397	0	1	6	FALSE	EXD2	1969	1	0	0	0.77307961		FALSE	0	EXD2	0	0
3951	2.81536313	0	0.35519397	0	1	6	FALSE	LARS	1969	1	0	0	0.77307961		FALSE	0	LARS	0	0
3954	2.81536313	0	0.35519397	0	1	6	FALSE	EXOC6	1969	1	0	0	0.77307961		FALSE	0	EXOC6	0	0
3956	2.81536313	0	0.35519397	0	1	6	FALSE	MED12	1969	1	0	0	0.77307961		FALSE	0	MED12	0	0
3958	2.81536313	0	0.35519397	0	1	6	FALSE	NES	1969	1	0	0	0.77307961		FALSE	0	NES	0	0
3960	2.79832402	7.59E-04	0.35735676	0	2	6	FALSE	HDAC2	1005	2	0	0	0.7752095		FALSE	0	HDAC2	449946	0.5025025
3962	2.81536313	0	0.35519397	0	1	6	FALSE	SNX9	1969	1	0	0	0.77307961		FALSE	0	SNX9	0	0
3964	2.81536313	0	0.35519397	0	1	6	FALSE	CDC42BPB	1969	1	0	0	0.77307961		FALSE	0	CDC42BPB	0	0
3966	2.81536313	0	0.35519397	0	1	6	FALSE	ANP32A	1969	1	0	0	0.77307961		FALSE	0	ANP32A	0	0
3968	2.78687151	5.18E-04	0.3588253	0	2	6	FALSE	PRMT1	1024	2	0	0	0.77664106		FALSE	0	PRMT1	236884	0.50643564
3970	2.81536313	0	0.35519397	0	1	6	FALSE	TXN	1969	1	0	0	0.77307961		FALSE	0	TXN	0	0
3972	2.81536313	0	0.35519397	0	1	6	FALSE	NCAPH2	1969	1	0	0	0.77307961		FALSE	0	NCAPH2	0	0
3974	2.81536313	0	0.35519397	0	1	6	FALSE	MED16	1969	1	0	0	0.77307961		FALSE	0	MED16	0	0
3976	2.81536313	0	0.35519397	0	1	6	FALSE	MED17	1969	1	0	0	0.77307961		FALSE	0	MED17	0	0
3978	2.74497207	0.00109806	0.36430243	0	2	6	FALSE	MED14	1034.5	2	0	0	0.78187849		FALSE	0	MED14	299696	0.50439239
3980	2.81536313	0	0.35519397	0	1	6	FALSE	AP3D1	1969	1	0	0	0.77307961		FALSE	0	AP3D1	0	0
3982	2.81536313	0	0.35519397	0	1	6	FALSE	LRRFIP1	1969	1	0	0	0.77307961		FALSE	0	LRRFIP1	0	0
3985	2.81536313	0	0.35519397	0	1	6	FALSE	ALCAM	1969	1	0	0	0.77307961		FALSE	0	ALCAM	0	0
3987	2.81536313	0	0.35519397	0	1	6	FALSE	SRSF10	1969	1	0	0	0.77307961		FALSE	0	SRSF10	0	0
3990	2.81536313	0	0.35519397	0	1	6	FALSE	PRUNE	1969	1	0	0	0.77307961		FALSE	0	PRUNE	0	0
3992	2.81536313	0	0.35519397	0	1	6	FALSE	NUP88	1969	1	0	0	0.77307961		FALSE	0	NUP88	0	0
3994	2.81536313	0	0.35519397	0	1	6	FALSE	NELFB	1969	1	0	0	0.77307961		FALSE	0	NELFB	0	0
3996	2.81536313	0	0.35519397	0	1	6	FALSE	CTR9	1969	1	0	0	0.77307961		FALSE	0	CTR9	0	0
3998	2.81536313	0	0.35519397	0	1	6	FALSE	SFXN3	1969	1	0	0	0.77307961		FALSE	0	SFXN3	0	0
4002	2.81536313	0	0.35519397	0	1	6	FALSE	KANK2	1969	1	0	0	0.77307961		FALSE	0	KANK2	0	0
4004	2.81173184	3.11E-04	0.35565269	0	2	6	FALSE	UNC5B	988	2	0	0	0.77353352		FALSE	0	UNC5B	21904	0.5005071
4006	2.79273743	4.10E-04	0.35807161	0	2	6	FALSE	PLOD1	1018.5	2	0	0	0.77590782		FALSE	0	PLOD1	205482	0.50647088
4008	2.81536313	0	0.35519397	0	1	6	FALSE	SOGA1	1969	1	0	0	0.77307961		FALSE	0	SOGA1	0	0
4010	2.81536313	0	0.35519397	0	1	6	FALSE	COPE	1969	1	0	0	0.77307961		FALSE	0	COPE	0	0
4012	2.79273743	4.10E-04	0.35807161	0	2	6	FALSE	SCRIB	1018.5	2	0	0	0.77590782		FALSE	0	SCRIB	205482	0.50647088
4014	2.81536313	0	0.35519397	0	1	6	FALSE	LARP4B	1969	1	0	0	0.77307961		FALSE	0	LARP4B	0	0
4016	2.81536313	0	0.35519397	0	1	6	FALSE	NNT	1969	1	0	0	0.77307961		FALSE	0	NNT	0	0
4018	2.79273743	0	0.35807161	1	2	6	FALSE	SMARCAD1	1032.5	2	0	0	0.77590782		FALSE	0	SMARCAD1	0	0.50887137
4020	2.73156425	4.30E-04	0.3660906	0.33333333	3	6	FALSE	MAGED1	727.6666667	3	0	0	0.78355447		FALSE	0	MAGED1	391824	0.3468447
4022	2.81536313	0	0.35519397	0	1	6	FALSE	ARCN1	1969	1	0	0	0.77307961		FALSE	0	ARCN1	0	0
4025	2.81536313	0	0.35519397	0	1	6	FALSE	EPB41L5	1969	1	0	0	0.77307961		FALSE	0	EPB41L5	0	0
4027	2.67486034	0.00151438	0.37385129	0.2	6	6	FALSE	CDC5L	400.5	6	0	0	0.79064246		FALSE	0	CDC5L	687976	0.17968867
4029	2.81536313	0	0.35519397	0	1	6	FALSE	CHD1	1969	1	0	0	0.77307961		FALSE	0	CHD1	0	0
4031	2.81536313	0	0.35519397	0	1	6	FALSE	IARS2	1969	1	0	0	0.77307961		FALSE	0	IARS2	0	0
4033	2.81536313	0	0.35519397	0	1	6	FALSE	OAS3	1969	1	0	0	0.77307961		FALSE	0	OAS3	0	0
4035	2.81536313	0	0.35519397	0	1	6	FALSE	BRAT1	1969	1	0	0	0.77307961		FALSE	0	BRAT1	0	0
4037	2.78603352	8.16E-04	0.35893323	0.33333333	3	6	FALSE	CHD4	690.3333333	3	0	0	0.77674581		FALSE	0	CHD4	492214	0.3388998
4039	2.81536313	0	0.35519397	0	1	6	FALSE	HEATR5B	1969	1	0	0	0.77307961		FALSE	0	HEATR5B	0	0
4041	2.81536313	0	0.35519397	0	1	6	FALSE	NCKAP1	1969	1	0	0	0.77307961		FALSE	0	NCKAP1	0	0
4044	2.81536313	0	0.35519397	0	1	6	FALSE	SLC25A5	1969	1	0	0	0.77307961		FALSE	0	SLC25A5	0	0
4046	2.81536313	0	0.35519397	0	1	6	FALSE	SUN2	1969	1	0	0	0.77307961		FALSE	0	SUN2	0	0
4048	2.69413408	0.00133354	0.37117678	0	4	6	FALSE	COPS6	571	4	0	0	0.78823324		FALSE	0	COPS6	773804	0.26425591
4050	2.8103352	2.86E-04	0.35582944	0	2	6	FALSE	RPL13	993	2	0	0	0.7737081		FALSE	0	RPL13	41126	0.50177036
4052	2.81536313	0	0.35519397	0	1	6	FALSE	RPH3A	1969	1	0	0	0.77307961		FALSE	0	RPH3A	0	0
4054	2.81536313	0	0.35519397	0	1	6	FALSE	NOP58	1969	1	0	0	0.77307961		FALSE	0	NOP58	0	0
4056	2.81536313	0	0.35519397	0	1	6	FALSE	INTS5	1969	1	0	0	0.77307961		FALSE	0	INTS5	0	0
4058	2.81536313	0	0.35519397	0	1	6	FALSE	MCM5	1969	1	0	0	0.77307961		FALSE	0	MCM5	0	0
4060	2.81536313	0	0.35519397	0	1	6	FALSE	BRD3	1969	1	0	0	0.77307961		FALSE	0	BRD3	0	0
4062	2.81536313	0	0.35519397	0	1	6	FALSE	C4orf27	1969	1	0	0	0.77307961		FALSE	0	C4orf27	0	0
4064	2.79832402	7.59E-04	0.35735676	0	2	6	FALSE	G3BP2	1005	2	0	0	0.7752095		FALSE	0	G3BP2	449946	0.5025025
4066	2.81536313	0	0.35519397	0	1	6	FALSE	GEMIN4	1969	1	0	0	0.77307961		FALSE	0	GEMIN4	0	0
4068	2.81536313	0	0.35519397	0	1	6	FALSE	NHLRC2	1969	1	0	0	0.77307961		FALSE	0	NHLRC2	0	0
4070	2.81536313	0	0.35519397	0	1	6	FALSE	PIK3C2A	1969	1	0	0	0.77307961		FALSE	0	PIK3C2A	0	0
4073	2.81536313	0	0.35519397	0	1	6	FALSE	PIK3C2B	1969	1	0	0	0.77307961	mRNAup	FALSE	0	PIK3C2B	0	0
4075	2.78296089	5.50E-04	0.35932952	0	2	6	FALSE	CTTN	1028	2	0	0	0.77712989		FALSE	0	CTTN	253944	0.50641026
4077	2.81536313	0	0.35519397	0	1	6	FALSE	PRPF40A	1969	1	0	0	0.77307961		FALSE	0	PRPF40A	0	0
4079	2.81536313	0	0.35519397	0	1	6	FALSE	UBAP2	1969	1	0	0	0.77307961		FALSE	0	UBAP2	0	0
4082	2.81536313	0	0.35519397	0	1	6	FALSE	CKAP4	1969	1	0	0	0.77307961		FALSE	0	CKAP4	0	0
4084	2.81536313	0	0.35519397	0	1	6	FALSE	PFN1	1969	1	0	0	0.77307961		FALSE	0	PFN1	0	0
4086	2.81536313	0	0.35519397	0	1	6	FALSE	CKAP5	1969	1	0	0	0.77307961		FALSE	0	CKAP5	0	0
4088	2.81536313	0	0.35519397	0	1	6	FALSE	CLPTM1	1969	1	0	0	0.77307961		FALSE	0	CLPTM1	0	0
4090	2.81536313	0	0.35519397	0	1	6	FALSE	VDAC2	1969	1	0	0	0.77307961		FALSE	0	VDAC2	0	0
4092	2.81536313	0	0.35519397	0	1	6	FALSE	KIF3B	1969	1	0	0	0.77307961		FALSE	0	KIF3B	0	0
4094	2.81536313	0	0.35519397	0	1	6	FALSE	UHRF1	1969	1	0	0	0.77307961		FALSE	0	UHRF1	0	0
4097	2.81536313	0	0.35519397	0	1	6	FALSE	CCDC88A	1969	1	0	0	0.77307961		FALSE	0	CCDC88A	0	0
4099	2.81536313	0	0.35519397	0	1	6	FALSE	NKRF	1969	1	0	0	0.77307961		FALSE	0	NKRF	0	0
4101	2.81536313	0	0.35519397	0	1	6	FALSE	ARHGEF40	1969	1	0	0	0.77307961		FALSE	0	ARHGEF40	0	0
4103	2.81536313	0	0.35519397	0	1	6	FALSE	SEC24A	1969	1	0	0	0.77307961		FALSE	0	SEC24A	0	0
4105	2.81536313	0	0.35519397	0	1	6	FALSE	ERCC4	1969	1	0	0	0.77307961		FALSE	0	ERCC4	0	0
4107	2.81536313	0	0.35519397	0	1	6	FALSE	IRF2BP1	1969	1	0	0	0.77307961		FALSE	0	IRF2BP1	0	0
4109	2.81536313	0	0.35519397	0	1	6	FALSE	PURA	1969	1	0	0	0.77307961		FALSE	0	PURA	0	0
4111	2.81536313	0	0.35519397	0	1	6	FALSE	VANGL2	1969	1	0	0	0.77307961		FALSE	0	VANGL2	0	0
4113	2.81536313	0	0.35519397	0	1	6	FALSE	LTV1	1969	1	0	0	0.77307961		FALSE	0	LTV1	0	0
4115	2.81340782	4.57E-04	0.35544083	0	2	6	FALSE	STIP1	987.5	2	0	0	0.77332402		FALSE	0	STIP1	141096	0.50050736
4117	2.81536313	0	0.35519397	0	1	6	FALSE	RNF40	1969	1	0	0	0.77307961		FALSE	0	RNF40	0	0
4119	2.81536313	0	0.35519397	0	1	6	FALSE	SCCPDH	1969	1	0	0	0.77307961		FALSE	0	SCCPDH	0	0
4121	2.81536313	0	0.35519397	0	1	6	FALSE	GLUD1	1969	1	0	0	0.77307961		FALSE	0	GLUD1	0	0
4123	2.81536313	0	0.35519397	0	1	6	FALSE	PSMA7	1969	1	0	0	0.77307961		FALSE	0	PSMA7	0	0
4125	2.81536313	0	0.35519397	0	1	6	FALSE	NUP133	1969	1	0	0	0.77307961		FALSE	0	NUP133	0	0
4127	2.81536313	0	0.35519397	0	1	6	FALSE	PRPF19	1969	1	0	0	0.77307961		FALSE	0	PRPF19	0	0
4129	2.81536313	0	0.35519397	0	1	6	FALSE	WASF2	1969	1	0	0	0.77307961		FALSE	0	WASF2	0	0
4131	2.81536313	0	0.35519397	0	1	6	FALSE	TBK1	1969	1	0	0	0.77307961		FALSE	0	TBK1	0	0
4133	2.81536313	0	0.35519397	0	1	6	FALSE	PRPF3	1969	1	0	0	0.77307961		FALSE	0	PRPF3	0	0
4136	2.81536313	0	0.35519397	0	1	6	FALSE	NT5DC2	1969	1	0	0	0.77307961		FALSE	0	NT5DC2	0	0
4138	2.81536313	0	0.35519397	0	1	6	FALSE	DDX1	1969	1	0	0	0.77307961		FALSE	0	DDX1	0	0
4140	2.81536313	0	0.35519397	0	1	6	FALSE	SKIV2L2	1969	1	0	0	0.77307961		FALSE	0	SKIV2L2	0	0
4142	2.81536313	0	0.35519397	0	1	6	FALSE	SEC23B	1969	1	0	0	0.77307961		FALSE	0	SEC23B	0	0
4144	2.81536313	0	0.35519397	0	1	6	FALSE	HNRNPAB	1969	1	0	0	0.77307961		FALSE	0	HNRNPAB	0	0
4146	2.81536313	0	0.35519397	0	1	6	FALSE	PFKM	1969	1	0	0	0.77307961		FALSE	0	PFKM	0	0
4148	2.81536313	0	0.35519397	0	1	6	FALSE	MCCC2	1969	1	0	0	0.77307961		FALSE	0	MCCC2	0	0
4150	2.81536313	0	0.35519397	0	1	6	FALSE	PFKL	1969	1	0	0	0.77307961		FALSE	0	PFKL	0	0
4152	2.81536313	0	0.35519397	0	1	6	FALSE	PGAM1	1969	1	0	0	0.77307961		FALSE	0	PGAM1	0	0
4154	2.81536313	0	0.35519397	0	1	6	FALSE	DDR2	1969	1	0	0	0.77307961		FALSE	0	DDR2	0	0
4156	2.81536313	0	0.35519397	0	1	6	FALSE	PNPLA6	1969	1	0	0	0.77307961		FALSE	0	PNPLA6	0	0
4158	2.81536313	0	0.35519397	0	1	6	FALSE	SBF1	1969	1	0	0	0.77307961		FALSE	0	SBF1	0	0
4160	2.81536313	0	0.35519397	0	1	6	FALSE	USP47	1969	1	0	0	0.77307961		FALSE	0	USP47	0	0
4162	2.81536313	0	0.35519397	0	1	6	FALSE	GBAS	1969	1	0	0	0.77307961		FALSE	0	GBAS	0	0
4164	2.81536313	0	0.35519397	0	1	6	FALSE	ATP7A	1969	1	0	0	0.77307961		FALSE	0	ATP7A	0	0
4166	2.81536313	0	0.35519397	0	1	6	FALSE	SV2A	1969	1	0	0	0.77307961		FALSE	0	SV2A	0	0
4168	2.81536313	0	0.35519397	0	1	6	FALSE	ATP12A	1969	1	0	0	0.77307961		FALSE	0	ATP12A	0	0
4170	2.81536313	0	0.35519397	0	1	6	FALSE	SDAD1	1969	1	0	0	0.77307961		FALSE	0	SDAD1	0	0
4172	2.81536313	0	0.35519397	0	1	6	FALSE	ARHGAP35	1969	1	0	0	0.77307961		FALSE	0	ARHGAP35	0	0
4174	2.81536313	0	0.35519397	0	1	6	FALSE	CDK2	1969	1	0	0	0.77307961		FALSE	0	CDK2	0	0
4176	2.81536313	0	0.35519397	0	1	6	FALSE	LPIN1	1969	1	0	0	0.77307961		FALSE	0	LPIN1	0	0
4178	2.80055866	8.91E-04	0.35707161	0	3	6	FALSE	CDK1	669.3333333	3	0	0	0.77493017		FALSE	0	CDK1	118376	0.33534036
4180	2.78687151	5.18E-04	0.3588253	0	2	6	FALSE	DNM1L	1024	2	0	0	0.77664106		FALSE	0	DNM1L	236884	0.50643564
4182	2.81536313	0	0.35519397	0	1	6	FALSE	PCBP1	1969	1	0	0	0.77307961		FALSE	0	PCBP1	0	0
4186	2.81536313	0	0.35519397	0	1	6	FALSE	SUMO4	1969	1	0	0	0.77307961		FALSE	0	SUMO4	0	0
4189	2.81536313	0	0.35519397	0	1	6	FALSE	ZSWIM8	1969	1	0	0	0.77307961		FALSE	0	ZSWIM8	0	0
4191	2.81536313	0	0.35519397	0	1	6	FALSE	SFSWAP	1969	1	0	0	0.77307961		FALSE	0	SFSWAP	0	0
4193	2.81536313	0	0.35519397	0	1	6	FALSE	FUS	1969	1	0	0	0.77307961		FALSE	0	FUS	0	0
4196	2.81536313	0	0.35519397	0	1	6	FALSE	VPS26B	1969	1	0	0	0.77307961		FALSE	0	VPS26B	0	0
4198	2.81536313	0	0.35519397	0	1	6	FALSE	HDGFRP2	1969	1	0	0	0.77307961		FALSE	0	HDGFRP2	0	0
4200	2.79273743	0	0.35807161	1	2	6	FALSE	GANAB	1032.5	2	0	0	0.77590782		FALSE	0	GANAB	0	0.50887137
4203	2.81536313	0	0.35519397	0	1	6	FALSE	DNAJC11	1969	1	0	0	0.77307961		FALSE	0	DNAJC11	0	0
4205	2.81536313	0	0.35519397	0	1	6	FALSE	MFAP1	1969	1	0	0	0.77307961		FALSE	0	MFAP1	0	0
4207	2.81536313	0	0.35519397	0	1	6	FALSE	STOML2	1969	1	0	0	0.77307961		FALSE	0	STOML2	0	0
4209	2.81536313	0	0.35519397	0	1	6	FALSE	PIK3C3	1969	1	0	0	0.77307961		FALSE	0	PIK3C3	0	0
4211	2.81536313	0	0.35519397	0	1	6	FALSE	CFL1	1969	1	0	0	0.77307961		FALSE	0	CFL1	0	0
4213	2.80614525	4.24E-04	0.35636074	0	2	6	FALSE	HSPA8	998.5	2	0	0	0.77423184		FALSE	0	HSPA8	240498	0.50277218
4215	2.73603352	4.02E-04	0.3654926	0	2	6	FALSE	HSPA5	1075	2	0	0	0.78299581		FALSE	0	HSPA5	386604	0.51609803
4217	2.81536313	0	0.35519397	0	1	6	FALSE	ARVCF	1969	1	0	0	0.77307961		FALSE	0	ARVCF	0	0
4219	2.78743017	5.19E-04	0.35875338	0	3	6	FALSE	POLR2A	688	3	0	0	0.77657123		FALSE	0	POLR2A	247914	0.34060486
4221	2.81536313	0	0.35519397	0	1	6	FALSE	HSPA4	1969	1	0	0	0.77307961		FALSE	0	HSPA4	0	0
4223	2.81536313	0	0.35519397	0	1	6	FALSE	TOMM70A	1969	1	0	0	0.77307961		FALSE	0	TOMM70A	0	0
4225	2.81536313	0	0.35519397	0	1	6	FALSE	DHX30	1969	1	0	0	0.77307961		FALSE	0	DHX30	0	0
4227	2.81536313	0	0.35519397	0	1	6	FALSE	PIK3CA	1969	1	0	0	0.77307961		FALSE	0	PIK3CA	0	0
4229	2.80391061	4.65E-04	0.35664475	0	2	6	FALSE	PPA1	1001	2	0	0	0.77451117		FALSE	0	PPA1	103218	0.50301811
4231	2.79162011	3.79E-04	0.35821493	0	2	6	FALSE	ABCE1	1020	2	0	0	0.77604749		FALSE	0	ABCE1	201164	0.50696517
4233	2.81536313	0	0.35519397	0	1	6	FALSE	CORO7	1969	1	0	0	0.77307961		FALSE	0	CORO7	0	0
4236	2.81536313	0	0.35519397	0	1	6	FALSE	SF3A1	1969	1	0	0	0.77307961		FALSE	0	SF3A1	0	0
4238	2.81536313	0	0.35519397	0	1	6	FALSE	EARS2	1969	1	0	0	0.77307961		FALSE	0	EARS2	0	0
4240	2.81536313	0	0.35519397	0	1	6	FALSE	YTHDF2	1969	1	0	0	0.77307961		FALSE	0	YTHDF2	0	0
4242	2.80223464	0	0.35685805	1	2	6	FALSE	EIF2A	1015	2	0	0	0.77472067		FALSE	0	EIF2A	0	0.50522648
4244	2.80083799	9.93E-04	0.357036	0	2	6	FALSE	FMR1	1002	2	0	0	0.77489525		FALSE	0	FMR1	413776	0.50175439
4246	2.81536313	0	0.35519397	0	1	6	FALSE	FKBP4	1969	1	0	0	0.77307961		FALSE	0	FKBP4	0	0
4248	2.81536313	0	0.35519397	0	1	6	FALSE	HERC5	1969	1	0	0	0.77307961		FALSE	0	HERC5	0	0
4250	2.81536313	0	0.35519397	0	1	6	FALSE	GSE1	1969	1	0	0	0.77307961		FALSE	0	GSE1	0	0
4252	2.81536313	0	0.35519397	0	1	6	FALSE	SORBS1	1969	1	0	0	0.77307961		FALSE	0	SORBS1	0	0
4254	2.81536313	0	0.35519397	0	1	6	FALSE	NACAD	1969	1	0	0	0.77307961		FALSE	0	NACAD	0	0
4256	2.81536313	0	0.35519397	0	1	6	FALSE	EXOSC4	1969	1	0	0	0.77307961		FALSE	0	EXOSC4	0	0
4258	2.81536313	0	0.35519397	0	1	6	FALSE	POLR3A	1969	1	0	0	0.77307961		FALSE	0	POLR3A	0	0
4260	2.81536313	0	0.35519397	0	1	6	FALSE	EDC4	1969	1	0	0	0.77307961		FALSE	0	EDC4	0	0
4262	2.81536313	0	0.35519397	0	1	6	FALSE	TBRG4	1969	1	0	0	0.77307961		FALSE	0	TBRG4	0	0
[truncated: 1,600 more rows]
