# Supplementary material for: The Genetic and Epigenetic Mechanisms Involved in Irreversible Pulp Neural Inflammation
Source: Dis Markers. 2021 Mar 8;2021:8831948. doi: 10.1155/2021/8831948 (PMC7968449; doi:10.1155/2021/8831948)
Supplement: Supplementary 6 — File S6: the topological characteristics of all nodes in the ceRNA network. [file 8831948.f6.txt]

SUID	AverageShortestPathLength	BetweennessCentrality	ClosenessCentrality	ClusteringCoefficient	Degree	Eccentricity	IsSingleNode	name	NeighborhoodConnectivity	NumberOfDirectedEdges	NumberOfUndirectedEdges	PartnerOfMultiEdgedNodePairs	Radiality	regulate	selected	SelfLoops	shared name	Stress	TopologicalCoefficient
100	4.73584906	0	0.21115538	0	1	7	FALSE	BATF	17	1	0	0	0.53301887	mRNAup	FALSE	0	BATF	0	0
101	3.73899371	0.06134578	0.26745164	0	17	6	FALSE	MIR155HG	3.11764706	17	0	0	0.65762579	lincRNAup	FALSE	0	MIR155HG	86224	0.09207161
103	4.73584906	0	0.21115538	0	1	7	FALSE	BID	17	1	0	0	0.53301887	mRNAup	FALSE	0	BID	0	0
105	4.73584906	0	0.21115538	0	1	7	FALSE	CD44	17	1	0	0	0.53301887	up	FALSE	0	CD44	0	0
107	4.73584906	0	0.21115538	0	1	7	FALSE	KPNA2	17	1	0	0	0.53301887	mRNAup	FALSE	0	KPNA2	0	0
109	4.73584906	0	0.21115538	0	1	7	FALSE	ENST00000538290	17	1	0	0	0.53301887	mRNAup	FALSE	0	ENST00000538290	0	0
111	3.40880503	0.01905647	0.29335793	0	11	6	FALSE	EZH2	10.09090909	11	0	0	0.69889937	mRNAup	FALSE	0	EZH2	45996	0.27548209
113	4.73584906	0	0.21115538	0	1	7	FALSE	ENST00000252725	17	1	0	0	0.53301887	mRNAup	FALSE	0	ENST00000252725	0	0
115	4.73584906	0	0.21115538	0	1	7	FALSE	MPZL2	17	1	0	0	0.53301887	up	FALSE	0	MPZL2	0	0
117	3.54716981	0.00332031	0.28191489	0	2	6	FALSE	IL13RA1	11.5	2	0	0	0.68160377	mRNAup	FALSE	0	IL13RA1	5126	0.5
119	4.73584906	0	0.21115538	0	1	7	FALSE	IBSP	17	1	0	0	0.53301887	up	FALSE	0	IBSP	0	0
121	3.33333333	0.01967274	0.3	0	9	6	FALSE	SRGN	11.55555556	9	0	0	0.70833333	up	FALSE	0	SRGN	40834	0.23989899
123	4.4591195	0.00691056	0.22425952	0	4	7	FALSE	hsa-miR-331-3p	2.25	4	0	0	0.56761006		FALSE	0	hsa-miR-331-3p	7876	0.25
124	3.79245283	0.00204056	0.26368159	0	2	6	FALSE	APMAP	4	2	0	0	0.6509434	mRNAup	FALSE	0	APMAP	2732	0.5
126	3.61006289	0.00892399	0.27700348	0	4	6	FALSE	SOD2	10	4	0	0	0.67374214	up	FALSE	0	SOD2	10308	0.34615385
128	3.68238994	0.00305729	0.27156277	0	2	6	FALSE	UBAC2	7	2	0	0	0.66470126	mRNAup	FALSE	0	UBAC2	3142	0.5
130	4.09433962	0.01571808	0.24423963	0	6	5	FALSE	hsa-miR-149-5p	3.5	6	0	0	0.61320755		FALSE	0	hsa-miR-149-5p	34486	0.17857143
131	5.09119497	0	0.19641754	0	1	6	FALSE	KBTBD11-OT1	6	1	0	0	0.48860063	lincRNAdown	FALSE	0	KBTBD11-OT1	0	0
133	4.15408805	0.01957716	0.24072672	0	8	7	FALSE	hsa-miR-542-3p	3.375	8	0	0	0.60573899		FALSE	0	hsa-miR-542-3p	53220	0.13194444
134	4.67924528	7.63E-04	0.21370968	0	2	6	FALSE	SLC2A3	7.5	2	0	0	0.54009434	up	FALSE	0	SLC2A3	816	0.54166667
136	3.52515723	0.0116972	0.28367529	0	8	6	FALSE	UCP2	8.5	8	0	0	0.68435535	up	FALSE	0	UCP2	29166	0.3
138	3.61320755	0.00219192	0.2767624	0	2	6	FALSE	NUSAP1	9	2	0	0	0.67334906	up	FALSE	0	NUSAP1	5908	0.5
140	3.90566038	0.00672437	0.25603865	0	4	7	FALSE	hsa-miR-485-3p	8.5	4	0	0	0.63679245		FALSE	0	hsa-miR-485-3p	8776	0.27777778
141	3.50314465	0.00762723	0.28545781	0	5	6	FALSE	PEX5	5.6	5	0	0	0.68710692	mRNAup	FALSE	0	PEX5	12638	0.25555556
143	5.1509434	0	0.19413919	0	1	8	FALSE	ALDH1A2	8	1	0	0	0.48113208	mRNAup	FALSE	0	ALDH1A2	0	0
145	5.1509434	0	0.19413919	0	1	8	FALSE	MYO19	8	1	0	0	0.48113208	mRNAup	FALSE	0	MYO19	0	0
147	3.49056604	0.00544671	0.28648649	0	3	6	FALSE	NR1D2	8.66666667	3	0	0	0.68867925	down	FALSE	0	NR1D2	10290	0.34848485
149	3.38050314	0.01216973	0.29581395	0	5	4	FALSE	H2AFY	11.6	5	0	0	0.70243711	mRNAup	FALSE	0	H2AFY	24188	0.25238095
151	3.66352201	0.0027436	0.27296137	0	3	6	FALSE	HIF1A	5	3	0	0	0.66705975	mRNAup	FALSE	0	HIF1A	8924	0.4
153	3.46226415	0.01590906	0.28882834	0	11	6	FALSE	NR4A1	9.36363636	11	0	0	0.69221698	up	FALSE	0	NR4A1	47496	0.30976431
155	3.8490566	0.00862483	0.25980392	0	5	7	FALSE	hsa-miR-539-3p	7.6	5	0	0	0.64386792		FALSE	0	hsa-miR-539-3p	10440	0.23571429
157	3.31132075	0.01689268	0.3019943	0	8	6	FALSE	POM121C	9.125	8	0	0	0.71108491	mRNAdown	FALSE	0	POM121C	26550	0.17663043
159	3.52830189	0.01053802	0.28342246	0	4	6	FALSE	ABRACL	5.25	4	0	0	0.68396226	mRNAup	FALSE	0	ABRACL	5428	0.28333333
162	5.09119497	0	0.19641754	0	1	6	FALSE	SYK	6	1	0	0	0.48860063	up	FALSE	0	SYK	0	0
164	3.6509434	0.00155085	0.27390181	0	2	6	FALSE	ZNF142	8	2	0	0	0.66863208	mRNAup	FALSE	0	ZNF142	4308	0.53846154
166	2.77672956	0.00996074	0.3601359	0	10	5	FALSE	hsa-miR-34c-5p	15	10	0	0	0.77790881		FALSE	0	hsa-miR-34c-5p	19848	0.14736842
167	3.64779874	0.00120571	0.27413793	0	5	6	FALSE	TAGLN	11.4	5	0	0	0.66902516	up	FALSE	0	TAGLN	1204	0.45217391
169	2.77044025	0.01309547	0.36095346	0	11	5	FALSE	hsa-miR-34a-5p	13.81818182	11	0	0	0.77869497		FALSE	0	hsa-miR-34a-5p	22338	0.13492823
170	3.39937107	0.00580736	0.29417206	0	10	6	FALSE	SYT1	10.9	10	0	0	0.70007862	down	FALSE	0	SYT1	9718	0.23023256
172	3.74213836	0.01908092	0.26722689	0	10	5	FALSE	hsa-miR-625-5p	3.5	10	0	0	0.6572327		FALSE	0	hsa-miR-625-5p	42454	0.10869565
173	3.60691824	0.00130789	0.27724499	0	2	6	FALSE	EFHD2	10	2	0	0	0.67413522	up	FALSE	0	EFHD2	2792	0.5
175	2.77672956	0.00996074	0.3601359	0	10	5	FALSE	hsa-miR-449b-5p	15	10	0	0	0.77790881		FALSE	0	hsa-miR-449b-5p	19848	0.14736842
176	3.74842767	1.57E-05	0.26677852	0	4	6	FALSE	BIRC5	10.5	4	0	0	0.65644654	mRNAup	FALSE	0	BIRC5	20	0.95
178	2.77044025	0.01309547	0.36095346	0	11	5	FALSE	hsa-miR-449a	13.81818182	11	0	0	0.77869497		FALSE	0	hsa-miR-449a	22338	0.13492823
179	3.74842767	1.57E-05	0.26677852	0	4	6	FALSE	SAT1	10.5	4	0	0	0.65644654	mRNAup	FALSE	0	SAT1	20	0.95
182	4.73899371	0	0.21101526	0	1	6	FALSE	ARRB2	10	1	0	0	0.53262579	up	FALSE	0	ARRB2	0	0
185	3.5754717	0.00230624	0.27968338	0	3	6	FALSE	CDC42EP1	10.33333333	3	0	0	0.67806604	mRNAup	FALSE	0	CDC42EP1	5246	0.35897436
187	3.63207547	3.52E-04	0.27532468	0	6	6	FALSE	LGR4	10.66666667	6	0	0	0.67099057	down	FALSE	0	LGR4	1434	0.56862745
190	3.76100629	1.80E-06	0.26588629	0	2	6	FALSE	IRF4	11	2	0	0	0.65487421	up	FALSE	0	IRF4	2	1
192	3.59433962	0.00179546	0.27821522	0	3	6	FALSE	THRA	9.33333333	3	0	0	0.67570755	down	FALSE	0	THRA	5020	0.36231884
194	3.71698113	4.44E-04	0.26903553	0	5	6	FALSE	CRABP2	9.6	5	0	0	0.66037736	mRNAdown	FALSE	0	CRABP2	376	0.61428571
197	3.61949686	0.00192402	0.27628149	0	3	6	FALSE	NR1D1	8.33333333	3	0	0	0.67256289	down	FALSE	0	NR1D1	5516	0.34920635
199	3.60062893	9.82E-04	0.27772926	0	8	6	FALSE	NR4A2	9.875	8	0	0	0.67492138	up	FALSE	0	NR4A2	2766	0.44375
201	3.59433962	0.00120583	0.27821522	0	8	6	FALSE	XBP1	10	8	0	0	0.67570755	mRNAup	FALSE	0	XBP1	2946	0.42857143
214	4.73899371	0	0.21101526	0	1	6	FALSE	MXD1	10	1	0	0	0.53262579	up	FALSE	0	MXD1	0	0
219	3.39308176	0.01062788	0.29471733	0	7	6	FALSE	ZNF385A	10.28571429	7	0	0	0.70086478	up	FALSE	0	ZNF385A	19886	0.20186335
230	4.23899371	6.52E-04	0.23590504	0	2	7	FALSE	hsa-miR-487a-3p	10.5	2	0	0	0.59512579		FALSE	0	hsa-miR-487a-3p	318	0.55882353
232	3.90251572	0.02256392	0.25624496	0	7	5	FALSE	hsa-miR-194-5p	4.71428571	7	0	0	0.63718553		FALSE	0	hsa-miR-194-5p	22666	0.1547619
233	3.47484277	0.00324498	0.28778281	0	2	6	FALSE	EFEMP1	14	2	0	0	0.69064465	mRNAdown	FALSE	0	EFEMP1	4606	0.5
235	4.89937107	0	0.20410783	0	1	6	FALSE	ITGA2	7	1	0	0	0.51257862	down	FALSE	0	ITGA2	0	0
237	4.12264151	0.00693187	0.24256293	0	3	7	FALSE	hsa-miR-802	9.33333333	3	0	0	0.60966981		FALSE	0	hsa-miR-802	8554	0.34722222
238	3.47169811	0.01238998	0.28804348	0	9	6	FALSE	BTG2	9.44444444	9	0	0	0.69103774	up	FALSE	0	BTG2	19420	0.33777778
240	4.72955975	2.56E-04	0.21143617	0	2	6	FALSE	CYR61	5	2	0	0	0.53380503	up	FALSE	0	CYR61	494	0.57142857
243	4.23899371	6.52E-04	0.23590504	0	2	7	FALSE	hsa-miR-154-3p	10.5	2	0	0	0.59512579		FALSE	0	hsa-miR-154-3p	318	0.55882353
247	3.37106918	0.0191573	0.29664179	0	6	6	FALSE	SLC7A5	10.5	6	0	0	0.70361635	up	FALSE	0	SLC7A5	20130	0.24358974
249	2.73584906	0.0093016	0.36551724	0	9	5	FALSE	hsa-miR-15a-5p	16.55555556	9	0	0	0.78301887		FALSE	0	hsa-miR-15a-5p	18382	0.16203704
250	3.48427673	0.00183816	0.28700361	0	6	6	FALSE	KIF5C	11.5	6	0	0	0.68946541	down	FALSE	0	KIF5C	2100	0.35
252	3.68238994	2.22E-04	0.27156277	0	6	6	FALSE	MT1G	8.33333333	6	0	0	0.66470126	up	FALSE	0	MT1G	190	0.66666667
254	2.83333333	0.00635851	0.35294118	0	4	5	FALSE	hsa-miR-3150a-3p	26.75	4	0	0	0.77083333		FALSE	0	hsa-miR-3150a-3p	5410	0.27393617
255	3.71069182	1.90E-04	0.26949153	0	2	6	FALSE	MSH5-SAPCD1	9.5	2	0	0	0.66116352	mRNAdown	FALSE	0	MSH5-SAPCD1	102	0.53125
257	2.73584906	0.0093016	0.36551724	0	9	5	FALSE	hsa-miR-16-5p	16.55555556	9	0	0	0.78301887		FALSE	0	hsa-miR-16-5p	18382	0.16203704
259	2.73899371	0.02362926	0.36509759	0	10	5	FALSE	hsa-miR-212-3p	12.3	10	0	0	0.78262579		FALSE	0	hsa-miR-212-3p	25370	0.11649485
260	3.72327044	3.64E-06	0.26858108	0	2	6	FALSE	IL1A	10.5	2	0	0	0.65959119	up	FALSE	0	IL1A	4	0.95
262	2.68238994	0.01024206	0.37280188	0	10	5	FALSE	hsa-let-7e-5p	18.1	10	0	0	0.78970126		FALSE	0	hsa-let-7e-5p	26034	0.178125
264	2.77044025	0.02400688	0.36095346	0	11	5	FALSE	hsa-miR-3121-3p	11.72727273	11	0	0	0.77869497		FALSE	0	hsa-miR-3121-3p	22676	0.11291866
265	3.53144654	3.75E-04	0.28317008	0	2	6	FALSE	B4GALT6	16	2	0	0	0.68356918	down	FALSE	0	B4GALT6	452	0.55555556
267	2.68867925	0.00813407	0.37192982	0	9	5	FALSE	hsa-let-7a-5p	19.77777778	9	0	0	0.78891509		FALSE	0	hsa-let-7a-5p	24036	0.19560185
268	3.61006289	4.17E-04	0.27700348	0	11	6	FALSE	RGS16	8.36363636	11	0	0	0.67374214	mRNAup	FALSE	0	RGS16	1166	0.73636364
270	3.7672956	0	0.2654424	0	1	6	FALSE	PTGS2	11	1	0	0	0.65408805	up	FALSE	0	PTGS2	0	0
272	2.78930818	0.01080659	0.35851184	0	4	5	FALSE	hsa-miR-4428	26.75	4	0	0	0.77633648		FALSE	0	hsa-miR-4428	10698	0.26822917
274	2.75157233	0.02751162	0.36342857	0	14	5	FALSE	hsa-miR-27a-3p	9.78571429	14	0	0	0.78105346		FALSE	0	hsa-miR-27a-3p	29096	0.0924812
275	3.74213836	1.42E-06	0.26722689	0	2	6	FALSE	ROR1	14	2	0	0	0.6572327	down	FALSE	0	ROR1	2	1
278	2.58490566	0.07287356	0.38686131	0	21	5	FALSE	hsa-miR-340-5p	7.66666667	21	0	0	0.80188679		FALSE	0	hsa-miR-340-5p	59100	0.06802721
279	3.44025157	0.0012574	0.29067642	0	3	6	FALSE	SOCS3	15	3	0	0	0.69496855	up	FALSE	0	SOCS3	1590	0.35897436
281	2.80188679	0.01898859	0.35690236	0	6	5	FALSE	hsa-miR-122-5p	17.83333333	6	0	0	0.77476415		FALSE	0	hsa-miR-122-5p	11934	0.17719298
283	2.73584906	0.0093016	0.36551724	0	9	5	FALSE	hsa-miR-195-5p	16.55555556	9	0	0	0.78301887		FALSE	0	hsa-miR-195-5p	18382	0.16203704
284	3.68867925	4.85E-05	0.27109974	0	5	6	FALSE	MYO1G	9.6	5	0	0	0.66391509	up	FALSE	0	MYO1G	44	0.78181818
286	3.68867925	4.85E-05	0.27109974	0	5	6	FALSE	COL12A1	9.6	5	0	0	0.66391509	up	FALSE	0	COL12A1	44	0.78181818
288	2.72327044	0.02835696	0.36720554	0	13	5	FALSE	hsa-miR-362-3p	10.30769231	13	0	0	0.78459119		FALSE	0	hsa-miR-362-3p	26222	0.09797571
289	3.58805031	0.00138661	0.27870289	0	3	6	FALSE	MCAM	14	3	0	0	0.67649371	up	FALSE	0	MCAM	1236	0.5
291	2.7327044	0.05609297	0.36593786	0	15	5	FALSE	hsa-miR-4731-5p	8.46666667	15	0	0	0.78341195		FALSE	0	hsa-miR-4731-5p	37334	0.07777778
292	3.72955975	0	0.26812816	0	1	6	FALSE	PER1	15	1	0	0	0.65880503	down	FALSE	0	PER1	0	0
294	2.68867925	0.00813407	0.37192982	0	9	5	FALSE	hsa-let-7f-5p	19.77777778	9	0	0	0.78891509		FALSE	0	hsa-let-7f-5p	24036	0.19560185
296	3.6163522	2.27E-04	0.27652174	0	10	6	FALSE	UTY	8.8	10	0	0	0.67295597	mRNAup	FALSE	0	UTY	636	0.78
298	2.68867925	0.00813407	0.37192982	0	9	5	FALSE	hsa-let-7d-5p	19.77777778	9	0	0	0.78891509		FALSE	0	hsa-let-7d-5p	24036	0.19560185
299	3.55345912	0.00105202	0.28141593	0	11	6	FALSE	BCAT1	9	11	0	0	0.68081761	mRNAup	FALSE	0	BCAT1	2256	0.44444444
301	2.75157233	0.02751162	0.36342857	0	14	5	FALSE	hsa-miR-27b-3p	9.78571429	14	0	0	0.78105346		FALSE	0	hsa-miR-27b-3p	29096	0.0924812
302	3.4245283	0.00218524	0.29201102	0	4	6	FALSE	EPDR1	15	4	0	0	0.69693396	mRNAup	FALSE	0	EPDR1	2660	0.36842105
305	3.61320755	4.81E-04	0.2767624	0	3	6	FALSE	PGF	11.33333333	3	0	0	0.67334906	mRNAup	FALSE	0	PGF	662	0.51666667
307	2.82075472	0.01206535	0.35451505	0	6	5	FALSE	hsa-miR-129-2-3p	18.16666667	6	0	0	0.77240566		FALSE	0	hsa-miR-129-2-3p	9582	0.18262411
308	3.6572327	6.03E-04	0.27343078	0	5	6	FALSE	TPD52	5.6	5	0	0	0.66784591	mRNAup	FALSE	0	TPD52	552	0.2875
310	2.71069182	0.03529256	0.36890951	0	15	5	FALSE	hsa-miR-5590-3p	9.66666667	15	0	0	0.78616352		FALSE	0	hsa-miR-5590-3p	31522	0.09122807
311	3.49371069	8.93E-04	0.28622862	0	3	6	FALSE	KIT	15	3	0	0	0.68828616	down	FALSE	0	KIT	1028	0.4375
315	3.61006289	4.17E-04	0.27700348	0	11	6	FALSE	PTAFR	8.36363636	11	0	0	0.67374214	up	FALSE	0	PTAFR	1166	0.73636364
317	3.61006289	4.78E-04	0.27700348	0	2	6	FALSE	ZNF704	10.5	2	0	0	0.67374214	down	FALSE	0	ZNF704	388	0.52777778
320	2.78930818	0.02388441	0.35851184	0	8	5	FALSE	hsa-miR-377-3p	14.25	8	0	0	0.77633648		FALSE	0	hsa-miR-377-3p	16224	0.13947368
321	3.78616352	0	0.2641196	0	1	6	FALSE	PLAUR	8	1	0	0	0.65172956	up	FALSE	0	PLAUR	0	0
323	3.74213836	1.42E-06	0.26722689	0	2	6	FALSE	RGS2	14	2	0	0	0.6572327	mRNAup	FALSE	0	RGS2	2	1
325	3.74213836	1.42E-06	0.26722689	0	2	6	FALSE	ABCA1	14	2	0	0	0.6572327	up	FALSE	0	ABCA1	2	1
327	2.68867925	0.00813407	0.37192982	0	9	5	FALSE	hsa-let-7c-5p	19.77777778	9	0	0	0.78891509		FALSE	0	hsa-let-7c-5p	24036	0.19560185
330	2.81446541	0.01369387	0.35530726	0	7	5	FALSE	hsa-miR-374c-5p	17.14285714	7	0	0	0.77319182		FALSE	0	hsa-miR-374c-5p	12664	0.17173252
331	3.41823899	0.00566315	0.2925483	0	10	6	FALSE	TM4SF1	8.3	10	0	0	0.69772013	up	FALSE	0	TM4SF1	6192	0.20277778
333	3.79874214	0	0.26324503	0	1	6	FALSE	STXBP2	6	1	0	0	0.65015723	up	FALSE	0	STXBP2	0	0
340	2.68867925	0.00821078	0.37192982	0	9	5	FALSE	hsa-let-7i-5p	19.11111111	9	0	0	0.78891509		FALSE	0	hsa-let-7i-5p	19874	0.18865741
342	2.71698113	0.02811	0.36805556	0	12	5	FALSE	hsa-miR-424-5p	12.66666667	12	0	0	0.78537736		FALSE	0	hsa-miR-424-5p	24400	0.12152778
344	3.38679245	0.00262444	0.29526462	0	4	6	FALSE	THBS1	13.75	4	0	0	0.70165094	mRNAup	FALSE	0	THBS1	2544	0.28977273
347	2.79559748	0.01048565	0.35770529	0	10	5	FALSE	hsa-miR-429	15.1	10	0	0	0.77555031		FALSE	0	hsa-miR-429	18992	0.15
348	3.61320755	0.00125676	0.2767624	0	6	6	FALSE	NAMPT	9.66666667	6	0	0	0.67334906	up	FALSE	0	NAMPT	1676	0.36111111
350	2.76100629	0.0141119	0.36218679	0	5	5	FALSE	hsa-miR-3179	22	5	0	0	0.77987421		FALSE	0	hsa-miR-3179	13368	0.21649485
353	3.45597484	0.00183254	0.28935396	0	4	6	FALSE	EGR1	13.25	4	0	0	0.69300314	up	FALSE	0	EGR1	2148	0.35
355	2.72327044	0.02462859	0.36720554	0	12	5	FALSE	hsa-miR-2682-5p	13.08333333	12	0	0	0.78459119		FALSE	0	hsa-miR-2682-5p	27832	0.12457045
356	3.48113208	0.00373839	0.28726287	0	7	6	FALSE	SLC25A37	11.85714286	7	0	0	0.68985849	up	FALSE	0	SLC25A37	5088	0.27142857
359	2.7327044	0.01887345	0.36593786	0	6	5	FALSE	hsa-miR-370-3p	18.33333333	6	0	0	0.78341195		FALSE	0	hsa-miR-370-3p	12978	0.18245614
362	3.50628931	0.00238243	0.28520179	0	6	6	FALSE	UNC119B	10.33333333	6	0	0	0.68671384	mRNAdown	FALSE	0	UNC119B	2840	0.2745098
364	3.38050314	0.00331914	0.29581395	0	6	6	FALSE	CD69	10.5	6	0	0	0.70243711	up	FALSE	0	CD69	3316	0.22093023
368	2.77987421	0.0068075	0.35972851	0	5	5	FALSE	hsa-miR-23c	23.2	5	0	0	0.77751572		FALSE	0	hsa-miR-23c	9500	0.23125
369	3.7327044	2.13E-04	0.26790227	0	6	6	FALSE	LMNB1	4.16666667	6	0	0	0.65841195	up	FALSE	0	LMNB1	260	0.52777778
371	3.78616352	0	0.2641196	0	1	6	FALSE	PXDN	4	1	0	0	0.65172956	up	FALSE	0	PXDN	0	0
373	3.62264151	1.19E-04	0.27604167	0	9	6	FALSE	PARVG	9.22222222	9	0	0	0.67216981	mRNAup	FALSE	0	PARVG	164	0.82222222
375	3.73899371	1.28E-04	0.26745164	0	3	6	FALSE	TRIB1	5.33333333	3	0	0	0.65762579	up	FALSE	0	TRIB1	132	0.54166667
377	2.7327044	0.02642775	0.36593786	0	11	5	FALSE	hsa-miR-132-3p	11.45454545	11	0	0	0.78341195		FALSE	0	hsa-miR-132-3p	28126	0.10777882
378	3.72327044	3.64E-06	0.26858108	0	2	6	FALSE	PKIB	10.5	2	0	0	0.65959119	mRNAup	FALSE	0	PKIB	4	0.95
380	3.62578616	6.45E-04	0.27580225	0	3	6	FALSE	ADM	12.66666667	3	0	0	0.67177673	up	FALSE	0	ADM	692	0.53030303
382	3.66666667	3.48E-05	0.27272727	0	3	6	FALSE	C3	7.66666667	3	0	0	0.66666667	up	FALSE	0	C3	104	0.74074074
384	3.69496855	1.13E-04	0.2706383	0	3	6	FALSE	SH3GL2	10.33333333	3	0	0	0.66312893	down	FALSE	0	SH3GL2	92	0.66666667
387	3.72327044	2.32E-04	0.26858108	0	2	6	FALSE	EDIL3	9.5	2	0	0	0.65959119	down	FALSE	0	EDIL3	130	0.53125
389	3.43081761	0.00202014	0.29147571	0	4	6	FALSE	FAM136A	15.5	4	0	0	0.6961478	mRNAdown	FALSE	0	FAM136A	2602	0.3625
391	2.79559748	0.01048565	0.35770529	0	10	5	FALSE	hsa-miR-200c-3p	15.1	10	0	0	0.77555031		FALSE	0	hsa-miR-200c-3p	18992	0.15
392	3.68553459	6.90E-04	0.27133106	0	5	6	FALSE	HOOK1	9	5	0	0	0.66430818	mRNAup	FALSE	0	HOOK1	810	0.42105263
394	3.70754717	2.77E-06	0.2697201	0	2	6	FALSE	JUNB	13.5	2	0	0	0.6615566	up	FALSE	0	JUNB	4	0.96153846
396	2.80188679	0.01327658	0.35690236	0	9	5	FALSE	hsa-miR-142-5p	13.88888889	9	0	0	0.77476415		FALSE	0	hsa-miR-142-5p	14094	0.13711584
397	3.70125786	1.67E-05	0.27017842	0	2	6	FALSE	SEL1L3	12	2	0	0	0.66234277	up	FALSE	0	SEL1L3	22	0.78571429
399	2.68238994	0.01024206	0.37280188	0	10	5	FALSE	hsa-let-7b-5p	18.1	10	0	0	0.78970126		FALSE	0	hsa-let-7b-5p	26034	0.178125
400	3.62264151	2.23E-04	0.27604167	0	3	6	FALSE	PMAIP1	9.66666667	3	0	0	0.67216981	mRNAup	FALSE	0	PMAIP1	606	0.54166667
405	3.72327044	8.01E-04	0.26858108	0	9	6	FALSE	VLDLR	6	9	0	0	0.65959119	down	FALSE	0	VLDLR	758	0.41666667
407	3.68867925	4.85E-05	0.27109974	0	5	6	FALSE	ACSL4	9.6	5	0	0	0.66391509	mRNAup	FALSE	0	ACSL4	44	0.78181818
409	3.75786164	0	0.26610879	0	1	6	FALSE	NRM	5	1	0	0	0.6552673	mRNAdown	FALSE	0	NRM	0	0
413	3.6918239	3.93E-04	0.27086882	0	3	6	FALSE	LRBA	12.33333333	3	0	0	0.66352201	mRNAup	FALSE	0	LRBA	454	0.56666667
415	3.51886792	0.00175677	0.28418231	0	4	6	FALSE	TOP2A	9.5	4	0	0	0.68514151	up	FALSE	0	TOP2A	1340	0.27419355
417	2.67924528	0.04164415	0.37323944	0	11	5	FALSE	hsa-miR-342-3p	12.09090909	11	0	0	0.79009434		FALSE	0	hsa-miR-342-3p	32254	0.11202938
419	2.79559748	0.01048565	0.35770529	0	10	5	FALSE	hsa-miR-200b-3p	15.1	10	0	0	0.77555031		FALSE	0	hsa-miR-200b-3p	18992	0.15
420	3.71069182	0.0012642	0.26949153	0	13	6	FALSE	LCP1	4.61538462	13	0	0	0.66116352	up	FALSE	0	LCP1	946	0.36153846
423	2.73584906	0.0093016	0.36551724	0	9	5	FALSE	hsa-miR-15b-5p	16.55555556	9	0	0	0.78301887		FALSE	0	hsa-miR-15b-5p	18382	0.16203704
426	3.77987421	5.95E-06	0.26455907	0	3	6	FALSE	LYN	10	3	0	0	0.65251572	up	FALSE	0	LYN	6	1
431	2.68238994	0.01047669	0.37280188	0	10	5	FALSE	hsa-let-7g-5p	18.1	10	0	0	0.78970126		FALSE	0	hsa-let-7g-5p	25870	0.178125
434	3.59433962	9.91E-04	0.27821522	0	3	6	FALSE	NF1	13.33333333	3	0	0	0.67570755	mRNAup	FALSE	0	NF1	970	0.53623188
437	2.84591195	4.39E-04	0.35138122	0	2	5	FALSE	hsa-miR-1278	52.5	2	0	0	0.76926101		FALSE	0	hsa-miR-1278	1096	0.54787234
439	2.81446541	0.02734138	0.35530726	0	7	5	FALSE	hsa-miR-140-3p	15.28571429	7	0	0	0.77319182		FALSE	0	hsa-miR-140-3p	12500	0.15197568
440	3.81132075	0	0.26237624	0	1	6	FALSE	GPNMB	7	1	0	0	0.64858491	up	FALSE	0	GPNMB	0	0
446	3.50628931	7.94E-04	0.28520179	0	3	6	FALSE	ZFP36	16.33333333	3	0	0	0.68671384	up	FALSE	0	ZFP36	1298	0.51111111
449	3.7672956	1.14E-04	0.2654424	0	2	6	FALSE	PDE7A	6	2	0	0	0.65408805	mRNAup	FALSE	0	PDE7A	60	0.55555556
452	3.67610063	2.58E-04	0.27202737	0	2	6	FALSE	SORL1	9.5	2	0	0	0.66548742	up	FALSE	0	SORL1	180	0.53125
458	2.82075472	0.01666645	0.35451505	0	4	5	FALSE	hsa-miR-574-5p	25	4	0	0	0.77240566		FALSE	0	hsa-miR-574-5p	8968	0.25263158
459	3.6918239	2.71E-04	0.27086882	0	2	6	FALSE	WAS	7	2	0	0	0.66352201	up	FALSE	0	WAS	198	0.54545455
461	3.72327044	3.64E-06	0.26858108	0	2	6	FALSE	PKN3	10.5	2	0	0	0.65959119	up	FALSE	0	PKN3	4	0.95
466	3.59433962	0.00114759	0.27821522	0	4	6	FALSE	MCL1	13	4	0	0	0.67570755	mRNAup	FALSE	0	MCL1	1404	0.46153846
470	2.72641509	0.03531491	0.36678201	0	10	5	FALSE	hsa-miR-491-5p	13.2	10	0	0	0.78419811		FALSE	0	hsa-miR-491-5p	33526	0.1257732
472	3.5754717	8.13E-04	0.27968338	0	4	6	FALSE	OSBPL3	8.25	4	0	0	0.67806604	up	FALSE	0	OSBPL3	786	0.27884615
474	3.6572327	3.03E-04	0.27343078	0	2	6	FALSE	TGM2	10	2	0	0	0.66784591	up	FALSE	0	TGM2	212	0.52941176
476	2.84591195	0.00304689	0.35138122	0	2	5	FALSE	hsa-miR-219a-5p	48.5	2	0	0	0.76926101		FALSE	0	hsa-miR-219a-5p	2214	0.50531915
477	3.81132075	4.13E-05	0.26237624	0	2	6	FALSE	SLCO5A1	4	2	0	0	0.64858491	mRNAup	FALSE	0	SLCO5A1	10	0.6
479	2.84591195	0.00113257	0.35138122	0	2	5	FALSE	hsa-miR-4661-5p	49.5	2	0	0	0.76926101		FALSE	0	hsa-miR-4661-5p	1350	0.51595745
481	2.71698113	0.03095743	0.36805556	0	14	5	FALSE	hsa-miR-329-3p	9.85714286	14	0	0	0.78537736		FALSE	0	hsa-miR-329-3p	28628	0.09323308
482	3.70754717	2.77E-06	0.2697201	0	2	6	FALSE	CBX7	13.5	2	0	0	0.6615566	mRNAup	FALSE	0	CBX7	4	0.96153846
484	2.83962264	0.00742107	0.35215947	0	3	5	FALSE	hsa-miR-144-5p	33.33333333	3	0	0	0.77004717		FALSE	0	hsa-miR-144-5p	3768	0.34397163
485	3.59433962	7.09E-04	0.27821522	0	4	6	FALSE	ZNF711	7.5	4	0	0	0.67570755	down	FALSE	0	ZNF711	470	0.29545455
490	3.72955975	0	0.26812816	0	1	6	FALSE	SULF2	6	1	0	0	0.65880503	up	FALSE	0	SULF2	0	0
493	3.6918239	6.81E-04	0.27086882	0	4	6	FALSE	G2E3	8.75	4	0	0	0.66352201	mRNAdown	FALSE	0	G2E3	506	0.35227273
495	3.70440252	7.81E-04	0.26994907	0	5	6	FALSE	MCM10	10.2	5	0	0	0.66194969	mRNAup	FALSE	0	MCM10	1010	0.48421053
498	3.59433962	8.05E-04	0.27821522	0	4	6	FALSE	RAB31	9.5	4	0	0	0.67570755	mRNAup	FALSE	0	RAB31	986	0.38636364
500	3.72327044	3.64E-06	0.26858108	0	2	6	FALSE	SNAP91	10.5	2	0	0	0.65959119	down	FALSE	0	SNAP91	4	0.95
503	3.64779874	4.81E-04	0.27413793	0	4	6	FALSE	COL4A1	7.25	4	0	0	0.66902516	up	FALSE	0	COL4A1	512	0.41666667
507	3.68867925	1.44E-04	0.27109974	0	2	6	FALSE	WARS	7	2	0	0	0.66391509	up	FALSE	0	WARS	90	0.54545455
511	3.76100629	7.60E-05	0.26588629	0	3	6	FALSE	LTBP1	7.66666667	3	0	0	0.65487421	mRNAdown	FALSE	0	LTBP1	72	0.55555556
516	2.79559748	0.02044661	0.35770529	0	10	5	FALSE	hsa-miR-369-3p	13.1	10	0	0	0.77555031		FALSE	0	hsa-miR-369-3p	20352	0.1287234
519	3.72955975	0	0.26812816	0	1	6	FALSE	GK	15	1	0	0	0.65880503	up	FALSE	0	GK	0	0
525	3.70125786	1.67E-05	0.27017842	0	2	6	FALSE	ERBB4	12	2	0	0	0.66234277	down	FALSE	0	ERBB4	22	0.78571429
527	2.83333333	0.00980032	0.35294118	0	4	5	FALSE	hsa-miR-137	26.75	4	0	0	0.77083333		FALSE	0	hsa-miR-137	6556	0.27393617
528	3.83018868	0	0.26108374	0	1	6	FALSE	SIK1	4	1	0	0	0.64622642	up	FALSE	0	SIK1	0	0
530	3.70754717	2.77E-06	0.2697201	0	2	6	FALSE	SKA3	13.5	2	0	0	0.6615566	mRNAup	FALSE	0	SKA3	4	0.96153846
534	3.66666667	5.70E-04	0.27272727	0	3	6	FALSE	ATF3	9	3	0	0	0.66666667	up	FALSE	0	ATF3	414	0.36363636
537	3.71383648	0	0.26926334	0	1	6	FALSE	PSD4	12	1	0	0	0.66077044	up	FALSE	0	PSD4	0	0
540	3.66352201	2.98E-04	0.27296137	0	2	6	FALSE	PER3	10.5	2	0	0	0.66705975	down	FALSE	0	PER3	228	0.52777778
545	3.72955975	0	0.26812816	0	1	6	FALSE	CENPP	15	1	0	0	0.65880503	mRNAdown	FALSE	0	CENPP	0	0
550	2.82075472	0.00556257	0.35451505	0	3	5	FALSE	hsa-miR-500a-3p	33.33333333	3	0	0	0.77240566		FALSE	0	hsa-miR-500a-3p	5272	0.34035088
553	3.74213836	1.42E-06	0.26722689	0	2	6	FALSE	ICAM2	14	2	0	0	0.6572327	up	FALSE	0	ICAM2	2	1
555	3.58176101	0	0.27919227	0	1	6	FALSE	OSMR	21	1	0	0	0.67727987	up	FALSE	0	OSMR	0	0
563	3.81132075	0	0.26237624	0	1	6	FALSE	KIAA0040	7	1	0	0	0.64858491	mRNAup	FALSE	0	KIAA0040	0	0
573	3.76100629	7.60E-05	0.26588629	0	3	6	FALSE	NABP1	7.66666667	3	0	0	0.65487421	up	FALSE	0	NABP1	72	0.55555556
575	3.77987421	5.95E-06	0.26455907	0	3	6	FALSE	TSPAN13	10	3	0	0	0.65251572	mRNAup	FALSE	0	TSPAN13	6	1
577	2.75471698	0.01039674	0.3630137	0	10	5	FALSE	hsa-miR-34b-5p	15.3	10	0	0	0.78066038		FALSE	0	hsa-miR-34b-5p	18862	0.15052632
582	3.66981132	4.61E-04	0.27249357	0	3	6	FALSE	ATP1B1	10	3	0	0	0.66627358	down	FALSE	0	ATP1B1	276	0.5
592	3.79874214	0	0.26324503	0	1	6	FALSE	SEMA4D	6	1	0	0	0.65015723	up	FALSE	0	SEMA4D	0	0
594	3.70754717	2.77E-06	0.2697201	0	2	6	FALSE	ZKSCAN2	13.5	2	0	0	0.6615566	mRNAup	FALSE	0	ZKSCAN2	4	0.96153846
596	3.54402516	0.00168888	0.28216504	0	4	6	FALSE	MFHAS1	11.5	4	0	0	0.68199686	up	FALSE	0	MFHAS1	1564	0.38888889
604	2.83333333	0.00921992	0.35294118	0	4	5	FALSE	hsa-miR-136-5p	26	4	0	0	0.77083333		FALSE	0	hsa-miR-136-5p	6530	0.26595745
605	3.75471698	2.12E-04	0.26633166	0	3	6	FALSE	TAP2	8.33333333	3	0	0	0.65566038	mRNAup	FALSE	0	TAP2	118	0.56410256
607	2.78301887	0.02610732	0.35932203	0	12	5	FALSE	hsa-miR-515-5p	10.66666667	12	0	0	0.77712264		FALSE	0	hsa-miR-515-5p	23878	0.10283688
610	3.47484277	0.00227648	0.28778281	0	4	6	FALSE	STAG2	12.25	4	0	0	0.69064465	mRNAup	FALSE	0	STAG2	1936	0.33088235
613	3.62893082	8.57E-04	0.27556326	0	6	6	FALSE	PCDH10	7.33333333	6	0	0	0.67138365	up	FALSE	0	PCDH10	1114	0.39583333
615	3.77358491	7.72E-06	0.265	0	2	6	FALSE	MSH2	10.5	2	0	0	0.65330189	mRNAup	FALSE	0	MSH2	8	0.86363636
617	3.67610063	0	0.27202737	0	1	6	FALSE	SGK1	11	1	0	0	0.66548742	mRNAup	FALSE	0	SGK1	0	0
620	3.77358491	7.72E-06	0.265	0	2	6	FALSE	SHCBP1	10.5	2	0	0	0.65330189	mRNAup	FALSE	0	SHCBP1	8	0.86363636
624	3.77987421	0	0.26455907	0	1	6	FALSE	PNP	12	1	0	0	0.65251572	up	FALSE	0	PNP	0	0
626	3.69496855	2.98E-05	0.2706383	0	3	6	FALSE	OLFM2	11.33333333	3	0	0	0.66312893	down	FALSE	0	OLFM2	54	0.79487179
628	3.61320755	5.93E-04	0.2767624	0	3	6	FALSE	BUB1B	10.66666667	3	0	0	0.67334906	mRNAup	FALSE	0	BUB1B	736	0.48333333
632	3.74213836	1.42E-06	0.26722689	0	2	6	FALSE	PDE8B	14	2	0	0	0.6572327	mRNAdown	FALSE	0	PDE8B	2	1
637	3.81132075	0	0.26237624	0	1	6	FALSE	TACSTD2	7	1	0	0	0.64858491	mRNAup	FALSE	0	TACSTD2	0	0
641	2.8081761	0.00452279	0.35610302	0	3	5	FALSE	hsa-miR-153-3p	34.66666667	3	0	0	0.77397799		FALSE	0	hsa-miR-153-3p	7000	0.35438596
651	2.82704403	0.00907552	0.35372636	0	5	5	FALSE	hsa-miR-129-1-3p	21.4	5	0	0	0.7716195		FALSE	0	hsa-miR-129-1-3p	7802	0.21702128
652	3.81132075	7.27E-06	0.26237624	0	2	6	FALSE	GFRA1	5.5	2	0	0	0.64858491	down	FALSE	0	GFRA1	4	0.9
654	3.72327044	0	0.26858108	0	1	6	FALSE	ATP2A3	10	1	0	0	0.65959119	up	FALSE	0	ATP2A3	0	0
657	2.70440252	0.04407579	0.36976744	0	12	5	FALSE	hsa-miR-766-5p	11.91666667	12	0	0	0.78694969		FALSE	0	hsa-miR-766-5p	32162	0.11139456
661	2.83333333	0.00203478	0.35294118	0	4	5	FALSE	hsa-miR-518d-5p	30.75	4	0	0	0.77083333		FALSE	0	hsa-miR-518d-5p	6022	0.31648936
664	3.58176101	0	0.27919227	0	1	6	FALSE	HAS2	21	1	0	0	0.67727987	up	FALSE	0	HAS2	0	0
667	2.84591195	0.00628931	0.35138122	0	2	5	FALSE	hsa-miR-4677-3p	48	2	0	0	0.76926101		FALSE	0	hsa-miR-4677-3p	2232	0.5
668	3.8427673	0	0.26022913	0	1	6	FALSE	EFNA5	2	1	0	0	0.64465409	down	FALSE	0	EFNA5	0	0
670	3.83647799	0	0.26065574	0	1	6	FALSE	PPARGC1A	3	1	0	0	0.64544025	mRNAup	FALSE	0	PPARGC1A	0	0
674	3.58176101	0	0.27919227	0	1	6	FALSE	MAP3K8	21	1	0	0	0.67727987	up	FALSE	0	MAP3K8	0	0
677	3.53144654	0.00209817	0.28317008	0	5	6	FALSE	FOS	12.2	5	0	0	0.68356918	up	FALSE	0	FOS	2164	0.29473684
682	2.83333333	0.00203478	0.35294118	0	4	5	FALSE	hsa-miR-519c-5p	30.75	4	0	0	0.77083333		FALSE	0	hsa-miR-519c-5p	6022	0.31648936
686	3.70754717	2.77E-06	0.2697201	0	2	6	FALSE	PROX1	13.5	2	0	0	0.6615566	up	FALSE	0	PROX1	4	0.96153846
688	2.80188679	0.01572167	0.35690236	0	9	5	FALSE	hsa-miR-519e-5p	13.33333333	9	0	0	0.77476415		FALSE	0	hsa-miR-519e-5p	16394	0.13120567
691	3.72012579	0	0.26880811	0	1	6	FALSE	DSP	12	1	0	0	0.65998428	mRNAup	FALSE	0	DSP	0	0
694	3.69496855	2.98E-05	0.2706383	0	3	6	FALSE	TPBG	11.33333333	3	0	0	0.66312893	mRNAup	FALSE	0	TPBG	54	0.79487179
701	3.58805031	8.75E-04	0.27870289	0	4	6	FALSE	PIM1	11.5	4	0	0	0.67649371	up	FALSE	0	PIM1	1130	0.45652174
705	2.82704403	0.00193954	0.35372636	0	5	5	FALSE	hsa-miR-4458	27.6	5	0	0	0.7716195		FALSE	0	hsa-miR-4458	5536	0.28297872
707	3.63836478	6.28E-04	0.27484875	0	4	6	FALSE	SPCS3	9.25	4	0	0	0.6702044	mRNAup	FALSE	0	SPCS3	544	0.375
712	3.72327044	0	0.26858108	0	1	6	FALSE	ARHGDIB	10	1	0	0	0.65959119	up	FALSE	0	ARHGDIB	0	0
716	2.84591195	4.34E-04	0.35138122	0	2	5	FALSE	hsa-miR-518e-5p	54	2	0	0	0.76926101		FALSE	0	hsa-miR-518e-5p	2086	0.56382979
719	3.67610063	2.53E-04	0.27202737	0	2	6	FALSE	ADAMTS1	8	2	0	0	0.66548742	up	FALSE	0	ADAMTS1	172	0.53846154
722	2.83333333	0.00320824	0.35294118	0	4	5	FALSE	hsa-miR-892c-5p	27.5	4	0	0	0.77083333		FALSE	0	hsa-miR-892c-5p	4762	0.28191489
726	3.70754717	2.77E-06	0.2697201	0	2	6	FALSE	PLAU	13.5	2	0	0	0.6615566	up	FALSE	0	PLAU	4	0.96153846
729	2.83333333	0.00203478	0.35294118	0	4	5	FALSE	hsa-miR-519b-5p	30.75	4	0	0	0.77083333		FALSE	0	hsa-miR-519b-5p	6022	0.31648936
737	2.6918239	0.03068129	0.37149533	0	11	5	FALSE	hsa-miR-942-5p	13.18181818	11	0	0	0.78852201		FALSE	0	hsa-miR-942-5p	27454	0.12558575
738	3.68867925	0	0.27109974	0	1	6	FALSE	OSR2	11	1	0	0	0.66391509	down	FALSE	0	OSR2	0	0
741	2.83333333	0.00203478	0.35294118	0	4	5	FALSE	hsa-miR-520c-5p	30.75	4	0	0	0.77083333		FALSE	0	hsa-miR-520c-5p	6022	0.31648936
746	3.65408805	6.15E-04	0.27366609	0	3	6	FALSE	DHFR	10.66666667	3	0	0	0.66823899	mRNAup	FALSE	0	DHFR	668	0.48333333
749	3.67610063	0	0.27202737	0	1	6	FALSE	SAMSN1	11	1	0	0	0.66548742	mRNAup	FALSE	0	SAMSN1	0	0
753	2.83962264	0.00182604	0.35215947	0	3	5	FALSE	hsa-miR-3924	35.66666667	3	0	0	0.77004717		FALSE	0	hsa-miR-3924	3030	0.36879433
755	3.67610063	0	0.27202737	0	1	6	FALSE	ZNF607	11	1	0	0	0.66548742	down	FALSE	0	ZNF607	0	0
758	2.84591195	0.00628931	0.35138122	0	2	5	FALSE	hsa-miR-409-5p	48	2	0	0	0.76926101		FALSE	0	hsa-miR-409-5p	2232	0.5
759	3.8427673	0	0.26022913	0	1	6	FALSE	FAM129A	2	1	0	0	0.64465409	up	FALSE	0	FAM129A	0	0
763	2.72327044	0.01602592	0.36720554	0	12	5	FALSE	hsa-miR-449c-5p	13.66666667	12	0	0	0.78459119		FALSE	0	hsa-miR-449c-5p	28086	0.13058419
766	2.84591195	0.00299201	0.35138122	0	2	5	FALSE	hsa-miR-520h	48.5	2	0	0	0.76926101		FALSE	0	hsa-miR-520h	2208	0.50531915
767	3.83018868	1.17E-05	0.26108374	0	2	6	FALSE	PRCP	2.5	2	0	0	0.64622642	mRNAup	FALSE	0	PRCP	4	0.75
769	3.76100629	1.75E-04	0.26588629	0	2	6	FALSE	PAPPA	8	2	0	0	0.65487421	down	FALSE	0	PAPPA	86	0.53846154
772	2.83333333	0.00273927	0.35294118	0	4	5	FALSE	hsa-miR-4500	30	4	0	0	0.77083333		FALSE	0	hsa-miR-4500	4202	0.30851064
778	3.79245283	0	0.26368159	0	1	6	FALSE	FOSB	10	1	0	0	0.6509434	up	FALSE	0	FOSB	0	0
789	3.81132075	0	0.26237624	0	1	6	FALSE	PRKAA2	7	1	0	0	0.64858491	down	FALSE	0	PRKAA2	0	0
792	3.62578616	8.14E-04	0.27580225	0	3	6	FALSE	IL6R	11	3	0	0	0.67177673	up	FALSE	0	IL6R	692	0.47619048
801	2.84591195	0.00308016	0.35138122	0	2	5	FALSE	hsa-miR-3909	48.5	2	0	0	0.76926101		FALSE	0	hsa-miR-3909	2224	0.50531915
802	3.83018868	1.65E-05	0.26108374	0	2	6	FALSE	ICAM1	2.5	2	0	0	0.64622642	up	FALSE	0	ICAM1	4	0.75
812	2.84591195	0.00313473	0.35138122	0	2	5	FALSE	hsa-miR-5586-5p	48.5	2	0	0	0.76926101		FALSE	0	hsa-miR-5586-5p	2228	0.50531915
813	3.83647799	9.92E-06	0.26065574	0	2	6	FALSE	MAP7D2	2	2	0	0	0.64544025	down	FALSE	0	MAP7D2	2	1
816	3.58805031	4.91E-04	0.27870289	0	2	6	FALSE	RRM2	13	2	0	0	0.67649371	mRNAup	FALSE	0	RRM2	492	0.52173913
821	3.69496855	6.95E-05	0.2706383	0	2	6	FALSE	STRIP2	9.5	2	0	0	0.66312893	mRNAup	FALSE	0	STRIP2	50	0.56666667
823	3.70754717	0	0.2697201	0	1	6	FALSE	TFPI2	15	1	0	0	0.6615566	up	FALSE	0	TFPI2	0	0
826	2.72955975	0.03199119	0.36635945	0	13	5	FALSE	hsa-miR-494-3p	11.15384615	13	0	0	0.78380503		FALSE	0	hsa-miR-494-3p	28694	0.10576923
828	3.72641509	0	0.26835443	0	1	6	FALSE	SFN	13	1	0	0	0.65919811	down	FALSE	0	SFN	0	0
835	3.81761006	0	0.26194399	0	1	6	FALSE	SHANK3	4	1	0	0	0.64779874	up	FALSE	0	SHANK3	0	0
837	2.71069182	0.04072362	0.36890951	0	10	5	FALSE	hsa-miR-665	11.6	10	0	0	0.78616352		FALSE	0	hsa-miR-665	23680	0.10927835
840	3.72955975	0	0.26812816	0	1	6	FALSE	LYPD6	15	1	0	0	0.65880503	mRNAdown	FALSE	0	LYPD6	0	0
843	3.72955975	0	0.26812816	0	1	6	FALSE	KLF2	15	1	0	0	0.65880503	up	FALSE	0	KLF2	0	0
846	2.77987421	0.00664217	0.35972851	0	4	5	FALSE	hsa-miR-4761-3p	26.5	4	0	0	0.77751572		FALSE	0	hsa-miR-4761-3p	7548	0.26842105
850	3.78616352	0	0.2641196	0	1	6	FALSE	DUSP1	8	1	0	0	0.65172956	up	FALSE	0	DUSP1	0	0
854	2.82075472	0.02018983	0.35451505	0	6	5	FALSE	hsa-miR-599	17.33333333	6	0	0	0.77240566		FALSE	0	hsa-miR-599	10768	0.17375887
856	3.81761006	0	0.26194399	0	1	6	FALSE	CMBL	6	1	0	0	0.64779874	mRNAdown	FALSE	0	CMBL	0	0
860	3.81761006	0	0.26194399	0	1	6	FALSE	NETO2	6	1	0	0	0.64779874	up	FALSE	0	NETO2	0	0
862	3.69496855	1.12E-04	0.2706383	0	2	6	FALSE	CD109	6.5	2	0	0	0.66312893	up	FALSE	0	CD109	54	0.55
867	2.84591195	0.00313473	0.35138122	0	2	5	FALSE	hsa-miR-615-3p	48.5	2	0	0	0.76926101		FALSE	0	hsa-miR-615-3p	2228	0.50531915
869	2.83962264	0.00295304	0.35215947	0	3	5	FALSE	hsa-miR-3200-5p	34	3	0	0	0.77004717		FALSE	0	hsa-miR-3200-5p	3702	0.35106383
872	2.83962264	0.00371796	0.35215947	0	3	5	FALSE	hsa-miR-520g-3p	35.66666667	3	0	0	0.77004717		FALSE	0	hsa-miR-520g-3p	3560	0.36879433
875	2.84591195	4.34E-04	0.35138122	0	2	5	FALSE	hsa-miR-522-5p	54	2	0	0	0.76926101		FALSE	0	hsa-miR-522-5p	2086	0.56382979
877	3.71383648	0	0.26926334	0	1	6	FALSE	CD37	12	1	0	0	0.66077044	up	FALSE	0	CD37	0	0
879	2.7672956	0.0063446	0.36136364	0	4	5	FALSE	hsa-miR-425-5p	27.25	4	0	0	0.77908805		FALSE	0	hsa-miR-425-5p	9482	0.27061856
885	3.83018868	0	0.26108374	0	1	6	FALSE	ASPM	4	1	0	0	0.64622642	mRNAup	FALSE	0	ASPM	0	0
888	3.81132075	0	0.26237624	0	1	6	FALSE	SLC27A1	7	1	0	0	0.64858491	mRNAdown	FALSE	0	SLC27A1	0	0
894	2.82075472	0.0073622	0.35451505	0	6	5	FALSE	hsa-miR-655-3p	19.16666667	6	0	0	0.77240566		FALSE	0	hsa-miR-655-3p	9894	0.19326241
900	3.70125786	0	0.27017842	0	1	6	FALSE	HAMP	12	1	0	0	0.66234277	up	FALSE	0	HAMP	0	0
912	3.72641509	0	0.26835443	0	1	6	FALSE	FGFR2	13	1	0	0	0.65919811	down	FALSE	0	FGFR2	0	0
916	2.80188679	0.01285352	0.35690236	0	9	5	FALSE	hsa-miR-873-5p	14.44444444	9	0	0	0.77476415		FALSE	0	hsa-miR-873-5p	16354	0.143026
925	3.61320755	5.12E-04	0.2767624	0	3	6	FALSE	FIGNL1	7.66666667	3	0	0	0.67334906	down	FALSE	0	FIGNL1	482	0.37037037
927	3.70754717	0	0.2697201	0	1	6	FALSE	TBC1D3H	10	1	0	0	0.6615566	mRNAup	FALSE	0	TBC1D3H	0	0
933	2.84591195	8.55E-04	0.35138122	0	2	5	FALSE	hsa-miR-6838-5p	50.5	2	0	0	0.76926101		FALSE	0	hsa-miR-6838-5p	1576	0.52659574
935	3.56918239	2.37E-04	0.28017621	0	2	6	FALSE	L3MBTL3	12	2	0	0	0.6788522	mRNAup	FALSE	0	L3MBTL3	160	0.52380952
937	3.58176101	0	0.27919227	0	1	6	FALSE	MPP6	21	1	0	0	0.67727987	down	FALSE	0	MPP6	0	0
942	2.84591195	8.40E-04	0.35138122	0	2	5	FALSE	hsa-miR-6893-3p	50.5	2	0	0	0.76926101		FALSE	0	hsa-miR-6893-3p	1496	0.52659574
944	3.58176101	0	0.27919227	0	1	6	FALSE	SNRPF	21	1	0	0	0.67727987	mRNAdown	FALSE	0	SNRPF	0	0
950	3.71383648	0	0.26926334	0	1	6	FALSE	NUAK2	12	1	0	0	0.66077044	up	FALSE	0	NUAK2	0	0
958	3.67610063	0	0.27202737	0	1	6	FALSE	PIK3CD	11	1	0	0	0.66548742	up	FALSE	0	PIK3CD	0	0
961	3.68867925	0	0.27109974	0	1	6	FALSE	PDPN	11	1	0	0	0.66391509	mRNAup	FALSE	0	PDPN	0	0
966	2.83962264	0.00540726	0.35215947	0	3	5	FALSE	hsa-miR-526b-5p	33	3	0	0	0.77004717		FALSE	0	hsa-miR-526b-5p	3634	0.34042553
971	3.70125786	0	0.27017842	0	1	6	FALSE	ABCC3	12	1	0	0	0.66234277	up	FALSE	0	ABCC3	0	0
978	2.69496855	0.00607551	0.37106184	0	8	5	FALSE	hsa-miR-98-5p	21.125	8	0	0	0.78812893		FALSE	0	hsa-miR-98-5p	18170	0.20963542
982	2.84591195	4.34E-04	0.35138122	0	2	5	FALSE	hsa-miR-518f-5p	54	2	0	0	0.76926101		FALSE	0	hsa-miR-518f-5p	2086	0.56382979
988	2.84591195	4.34E-04	0.35138122	0	2	5	FALSE	hsa-miR-519a-5p	54	2	0	0	0.76926101		FALSE	0	hsa-miR-519a-5p	2086	0.56382979
991	3.70125786	0	0.27017842	0	1	6	FALSE	PIM2	12	1	0	0	0.66234277	up	FALSE	0	PIM2	0	0
1004	3.70754717	0	0.2697201	0	1	6	FALSE	NEURL1B	10	1	0	0	0.6615566	mRNAdown	FALSE	0	NEURL1B	0	0
1006	3.81132075	7.27E-06	0.26237624	0	2	6	FALSE	ITPR3	5.5	2	0	0	0.64858491	up	FALSE	0	ITPR3	4	0.9
1008	3.72012579	0	0.26880811	0	1	6	FALSE	AQP1	12	1	0	0	0.65998428	up	FALSE	0	AQP1	0	0
1014	2.80188679	0.00650152	0.35690236	0	4	5	FALSE	hsa-miR-448	26.75	4	0	0	0.77476415		FALSE	0	hsa-miR-448	8700	0.27105263
1018	3.68867925	0	0.27109974	0	1	6	FALSE	PEG10	11	1	0	0	0.66391509	down	FALSE	0	PEG10	0	0
1021	2.83333333	0.00203478	0.35294118	0	4	5	FALSE	hsa-miR-526a	30.75	4	0	0	0.77083333		FALSE	0	hsa-miR-526a	6022	0.31648936
1038	2.84591195	4.34E-04	0.35138122	0	2	5	FALSE	hsa-miR-523-5p	54	2	0	0	0.76926101		FALSE	0	hsa-miR-523-5p	2086	0.56382979
1042	5.45597484	0	0.1832853	0	1	8	FALSE	GATA3-AS1	4	1	0	0	0.44300314	lincRNAdown	FALSE	0	GATA3-AS1	0	0
1044	4.46855346	0.00413058	0.22378607	0	4	6	FALSE	LINC00630	5.75	4	0	0	0.56643082	lincRNAup	FALSE	0	LINC00630	3800	0.296875
1049	3.61949686	0.00306576	0.27628149	0	5	6	FALSE	LINC01132	10.4	5	0	0	0.67256289	lincRNAup	FALSE	0	LINC01132	11828	0.49473684
1061	1.85534591	0.78103311	0.53898305	0	95	4	FALSE	XIST	7.11578947	95	0	0	0.89308176	lincRNAdown	FALSE	0	XIST	683380	0.03168803
2217								Node 1							FALSE		Node 1
2219								Node 2							FALSE		Node 2
2221								Node 3							FALSE		Node 3
2223								Node 4							FALSE		Node 4
2225								Node 5							FALSE		Node 5
